# Supplementary material
Source: Research Square preprint supplement (doi:10.21203/rs.3.rs-9927563/v1)
Supplement: Supplementary file 2 [file bc00c5f150097851a596be16.xlsx]

## Sheet: Supplementary Fig. 1a
moox-2					moox-0
degree	Raw data	Calculated line	Difference	Bragg position	degree	Raw data	Calculated line	Difference	Bragg position
10.0185	167.88				10.354	496.93
10.0515	168.69				10.387	470.27
10.0845	167.79				10.42	468.05
10.1175	166.31				10.453	502.73
10.1505	170.12				10.486	470.68
10.1835	166.13				10.519	460.55
10.2165	166.65				10.552	488.73
10.2495	168.95				10.585	473.63
10.2825	161				10.618	463.89
10.3155	163.81				10.651	478.11
10.3485	164.81				10.684	499.27
10.3815	173.89				10.717	468.33
10.4145	158.19				10.75	441.73
10.4475	168.77				10.783	444.71
10.4805	172.5				10.816	466.64
10.5135	163.15				10.849	467.75
10.5465	165.5				10.882	503.01
10.5795	164.79				10.915	464.74
10.6125	163.1				10.948	421.78
10.6455	173.77				10.981	432.82
10.6785	161.78				11.014	474.23
10.7115	162.37				11.047	474.21
10.7445	157.45				11.08	501.87
10.7775	163				11.113	457.06
10.8105	168.28				11.146	454.97
10.8435	154.37				11.179	447.53
10.8765	155.44				11.212	431.91
10.9095	164.77				11.245	456.43
10.9425	161.08				11.278	447
10.9755	152.21				11.311	460.71
11.0085	160.57				11.344	474.13
11.0415	167.25				11.377	474.22
11.0745	166.35				11.41	448.69
11.1075	160.16				11.443	443.88
11.1405	160.86				11.476	450.14
11.1735	146.36				11.509	436.24
11.2065	159.29				11.542	431.38
11.2395	159.23				11.575	420.56
11.2725	153.83				11.608	436.72
11.3055	162.65				11.641	438.04
11.3385	158.13				11.674	404.56
11.3715	167.91				11.707	423.57
11.4045	158.95				11.74	447.87
11.4375	162.17				11.773	425.4
11.4705	165.43				11.806	421.73
11.5035	167.77				11.839	439.13
11.5365	174.13				11.872	436.32
11.5695	171.66				11.905	434.41
11.6025	173.66				11.938	437.37
11.6355	171.01				11.971	456.32
11.6685	175.04				12.004	468.41
11.7015	162.29				12.037	455.23
11.7345	161.31				12.07	457.23
11.7675	170.87				12.103	444.97
11.8005	174.75				12.136	456.53
11.8335	177.45				12.169	439.52
11.8665	178.85				12.202	464.83
11.8995	183.13				12.235	479.07
11.9325	185.85				12.268	486.61
11.9655	188.52				12.301	478.42
11.9985	189.4				12.334	504.08
12.0315	204.96				12.367	530.16
12.0645	207.14				12.4	558.65
12.0975	213.27				12.433	606.47
12.1305	233.61				12.466	595
12.1635	243.31				12.499	639.7
12.1965	258.08				12.532	737.41
12.2295	271.05				12.565	795.95
12.2625	291.31				12.598	899.43
12.2955	331.26				12.631	989.09
12.3285	366.74				12.664	1145.28
12.3615	400.24				12.697	1275.95
12.3945	446.37				12.73	1441.99
12.4275	502.48				12.763	1751.01
12.4605	569.11				12.796	1913.2
12.4935	664.67				12.829	1918.23
12.5265	755.96				12.862	1955.5
12.5595	835.13				12.895	1912.11
12.5925	970.9				12.928	1609.68
12.6255	1162.32				12.961	1289.85
12.6585	1315.61				12.994	988.71
12.6915	1383.87				13.027	811.83
12.7245	1453.46				13.06	697.89
12.7575	1397.68				13.093	609.16
12.7905	1253.4				13.126	519.41
12.8235	1111.39				13.159	497.3
12.8565	946.94				13.192	474.03
12.8895	768.31				13.225	390.76
12.9225	612.61				13.258	398.91
12.9555	477.81				13.291	421.18
12.9885	401.24				13.324	462.91
13.0215	327.27				13.357	407.65
13.0545	270.6				13.39	385.25
13.0875	228.94				13.423	361.5
13.1205	212.47				13.456	389.57
13.1535	189.73				13.489	352.12
13.1865	175.26				13.522	370.98
13.2195	168.21				13.555	356.49
13.2525	157.02				13.588	342.36
13.2855	144.44				13.621	354.27
13.3185	131.46				13.654	341.28
13.3515	134.36				13.687	353.87
13.3845	133.9				13.72	353.87
13.4175	137.81				13.753	350.3
13.4505	123.99				13.786	349.31
13.4835	128.78				13.819	351.7
13.5165	124.63				13.852	374.86
13.5495	109.85				13.885	373.65
13.5825	117.34				13.918	350.43
13.6155	124.95				13.951	327.89
13.6485	111.78				13.984	349.98
13.6815	109.65				14.017	369
13.7145	114.68				14.05	342.6
13.7475	111.04				14.083	337.2
13.7805	117.15				14.116	361.59
13.8135	124.1				14.149	364.22
13.8465	117.68				14.182	372.54
13.8795	109.98				14.215	385.48
13.9125	101.2				14.248	407.47
13.9455	117.43				14.281	437.97
13.9785	106.55				14.314	447.97
14.0115	109.43				14.347	447.58
14.0445	105.14				14.38	417.47
14.0775	106.87				14.413	372.81
14.1105	101.64				14.446	354.22
14.1435	98.7				14.479	337.87
14.1765	98.09				14.512	330.14
14.2095	104.11				14.545	354.88
14.2425	104.9				14.578	364.4
14.2755	104.05				14.611	334.31
14.3085	109.26				14.644	319.77
14.3415	103.6				14.677	306.03
14.3745	104.4				14.71	285.66
14.4075	105.84				14.743	279.82
14.4405	106.47				14.776	291.85
14.4735	99.65				14.809	308.72
14.5065	100.14				14.842	335.32
14.5395	100.52				14.875	327.08
14.5725	96.64				14.908	322.26
14.6055	96.41				14.941	297.79
14.6385	97.89				14.974	293.79
14.6715	100.47				15.007	305.42
14.7045	105.02				15.04	309.65
14.7375	100.66				15.073	299.03
14.7705	93.42				15.106	321.82
14.8035	99.57				15.139	314.03
14.8365	105.05				15.172	319.14
14.8695	101.92				15.205	294.73
14.9025	98.67				15.238	302.11
14.9355	94.56				15.271	287.75
14.9685	93.88				15.304	319.39
15.0015	93.14				15.337	291.24
15.0345	96.09				15.37	310.57
15.0675	100.27				15.403	283.07
15.1005	92.62				15.436	281.5
15.1335	94.03				15.469	240.5
15.1665	92.68				15.502	275.21
15.1995	93.68				15.535	313.79
15.2325	95.44				15.568	302.13
15.2655	95.56				15.601	326.81
15.2985	91.51				15.634	311.32
15.3315	97.43				15.667	259.74
15.3645	87.91				15.7	285.68
15.3975	84.66				15.733	239.91
15.4305	91.51				15.766	261.16
15.4635	90.9				15.799	288.66
15.4965	92.9				15.832	310.89
15.5295	91.03				15.865	275.57
15.5625	95.8				15.898	263.97
15.5955	97.96				15.931	263
15.6285	90.7				15.964	273.24
15.6615	85.24				15.997	260.71
15.6945	87.57				16.03	295.26
15.7275	88.59				16.063	289.14
15.7605	102.65				16.096	270.75
15.7935	96.81				16.129	281.22
15.8265	83.85				16.162	274.89
15.8595	90.99				16.195	281.18
15.8925	87.99				16.228	250.9
15.9255	93.13				16.261	248.13
15.9585	89.42				16.294	250.27
15.9915	97.66				16.327	265
16.0245	90.12				16.36	264.69
16.0575	84.79				16.393	267.51
16.0905	89.64				16.426	256.47
16.1235	95.16				16.459	261.95
16.1565	88.33				16.492	261.49
16.1895	83.12				16.525	275.88
16.2225	93.32				16.558	272.23
16.2555	82.91				16.591	273.2
16.2885	87.13				16.624	275.4
16.3215	90.07				16.657	272.41
16.3545	90.3				16.69	259.92
16.3875	82.18				16.723	253.81
16.4205	82.43				16.756	265.35
16.4535	80.78				16.789	257.96
16.4865	89.17				16.822	250.77
16.5195	85.64				16.855	243.2
16.5525	76.57				16.888	239.49
16.5855	76.04				16.921	253.84
16.6185	82.21				16.954	251.47
16.6515	80.6				16.987	252.61
16.6845	83.34				17.02	264.55
16.7175	76.57				17.053	254.41
16.7505	82.11				17.086	253.86
16.7835	86.26				17.119	251.92
16.8165	87.82				17.152	245.91
16.8495	80.19				17.185	266.75
16.8825	82.41				17.218	249.39
16.9155	83.98				17.251	246.8
16.9485	83.18				17.284	241.66
16.9815	82.25				17.317	232.7
17.0145	78.25				17.35	251.8
17.0475	79.21				17.383	255.33
17.0805	83.92				17.416	236.89
17.1135	84.89				17.449	239
17.1465	80.77				17.482	240.63
17.1795	81.49				17.515	239.82
17.2125	80.22				17.548	234.37
17.2455	78.88				17.581	253.88
17.2785	76.91				17.614	226.43
17.3115	72.1				17.647	228.95
17.3445	76.81				17.68	210.51
17.3775	86.36				17.713	229
17.4105	85.39				17.746	231.22
17.4435	78.98				17.779	243.11
17.4765	80.98				17.812	246.82
17.5095	88.83				17.845	236.26
17.5425	86.41				17.878	250.52
17.5755	82.16				17.911	244.74
17.6085	81.64				17.944	226.19
17.6415	76.18				17.977	228.33
17.6745	77.84				18.01	231.1
17.7075	77.88				18.043	219.74
17.7405	76.74				18.076	232.75
17.7735	76.91				18.109	247.48
17.8065	73.56				18.142	201.53
17.8395	72.11				18.175	229.14
17.8725	75.67				18.208	251.85
17.9055	78.1				18.241	247.09
17.9385	76.44				18.274	220.85
17.9715	76.05				18.307	198.02
18.0045	73.62				18.34	216.8
18.0375	69.6				18.373	219.86
18.0705	81.26				18.406	226.42
18.1035	86.25				18.439	224.28
18.1365	74.12				18.472	238.28
18.1695	71.65				18.505	220.64
18.2025	66.04				18.538	237.08
18.2355	75.84				18.571	231.45
18.2685	70.88				18.604	223.26
18.3015	73.59				18.637	225.32
18.3345	82.02				18.67	212.12
18.3675	74.46				18.703	239.55
18.4005	74.06				18.736	227.22
18.4335	75.14				18.769	231.34
18.4665	72.01				18.802	226.34
18.4995	77.5				18.835	228.52
18.5325	75.47				18.868	205.55
18.5655	78.64				18.901	235.59
18.5985	82.52				18.934	222.81
18.6315	80.85				18.967	207.78
18.6645	80.84				19	222.57
18.6975	80.07				19.033	223.22
18.7305	70.05				19.066	217.34
18.7635	77.91				19.099	224.48
18.7965	68.89				19.132	220.04
18.8295	77.64				19.165	205.59
18.8625	71.11				19.198	209.83
18.8955	78.53				19.231	215.4
18.9285	70.74				19.264	221.48
18.9615	67.46				19.297	226.58
18.9945	70.64				19.33	227.56
19.0275	74.44				19.363	216.43
19.0605	65.78				19.396	205.92
19.0935	67.99				19.429	212.36
19.1265	77.16				19.462	213.87
19.1595	74.1				19.495	213
19.1925	71.15				19.528	217
19.2255	72.39				19.561	214.15
19.2585	71.69				19.594	223.95
19.2915	82.87				19.627	232.7
19.3245	71.87				19.66	209.25
19.3575	65.7				19.693	194.95
19.3905	66.66				19.726	207.12
19.4235	73.58				19.759	210.2
19.4565	76.2				19.792	211.42
19.4895	75.56				19.825	215.51
19.5225	70.17				19.858	210.17
19.5555	73.6				19.891	212.95
19.5885	70				19.924	205.28
19.6215	67.31				19.957	205.33
19.6545	71.81				19.99	228.69
19.6875	66.28				20.023	222.03
19.7205	65.91				20.056	199.43
19.7535	74.3				20.089	179.64
19.7865	73.5				20.122	191.29
19.8195	73.99				20.155	220.92
19.8525	69.53				20.188	238.36
19.8855	68.3				20.221	203.89
19.9185	74.58				20.254	191.53
19.9515	74.6				20.287	189.94
19.9845	73.17				20.32	206.18
20.0175	74.38				20.353	203.91
20.0505	68.22				20.386	195.69
20.0835	64.75				20.419	224.11
20.1165	67.63				20.452	187.62
20.1495	69.82				20.485	208.45
20.1825	69.55				20.518	190.22
20.2155	61.07				20.551	195.07
20.2485	61.25				20.584	223.33
20.2815	66.22				20.617	215.72
20.3145	63.8				20.65	210.84
20.3475	68.74				20.683	191.27
20.3805	76.91				20.716	176.56
20.4135	72.57				20.749	193.04
20.4465	72.09				20.782	195.05
20.4795	71.38				20.815	200.97
20.5125	68.87				20.848	213.77
20.5455	61.67				20.881	218.85
20.5785	63.39				20.914	190.29
20.6115	62.41				20.947	180.5
20.6445	72.97				20.98	190.25
20.6775	76.92				21.013	192.84
20.7105	70.05				21.046	200.25
20.7435	63				21.079	193.85
20.7765	64.79				21.112	204.45
20.8095	63.97				21.145	191.24
20.8425	68.88				21.178	196.7
20.8755	61.02				21.211	213.18
20.9085	61.43				21.244	201.05
20.9415	61.74				21.277	189
20.9745	67.42				21.31	197.47
21.0075	60.41				21.343	206.34
21.0405	64.78				21.376	200.2
21.0735	67.83				21.409	169.61
21.1065	67.64				21.442	182.89
21.1395	71.9				21.475	174.42
21.1725	65.08				21.508	193.07
21.2055	69.88				21.541	203.43
21.2385	60.51				21.574	181.47
21.2715	69.22				21.607	201.04
21.3045	65.42				21.64	197.71
21.3375	62.31				21.673	202.66
21.3705	64.37				21.706	195.93
21.4035	67.12				21.739	186.44
21.4365	68.88				21.772	187.51
21.4695	67.96				21.805	166.84
21.5025	71.49				21.838	184.36
21.5355	70.14				21.871	202.64
21.5685	70.95				21.904	203.89
21.6015	67.6				21.937	187.92
21.6345	66.58				21.97	183.94
21.6675	68.63				22.003	188.76
21.7005	68.35				22.036	196.54
21.7335	67.36				22.069	183.36
21.7665	71.57				22.102	186.59
21.7995	64.42				22.135	184.58
21.8325	70.55				22.168	174.16
21.8655	72.73				22.201	195.32
21.8985	65.14				22.234	195.29
21.9315	70.8				22.267	193.75
21.9645	65.48				22.3	199.41
21.9975	64.04				22.333	206.89
22.0305	63.38				22.366	208.19
22.0635	68.03				22.399	200.51
22.0965	61.11				22.432	199.51
22.1295	67.83				22.465	216.8
22.1625	70.07				22.498	222.8
22.1955	74.79				22.531	204.03
22.2285	76.32				22.564	208.32
22.2615	80.54				22.597	208.06
22.2945	76.91				22.63	204.8
22.3275	75.96				22.663	211.47
22.3605	77.7				22.696	230.34
22.3935	88.88				22.729	215.38
22.4265	96.19				22.762	216.72
22.4595	95.5				22.795	244.65
22.4925	92.68				22.828	250.89
22.5255	89.32				22.861	251.04
22.5585	93.56				22.894	248.33
22.5915	103.95				22.927	287.95
22.6245	107.79				22.96	323.7
22.6575	107.09				22.993	369.52
22.6905	106.8				23.026	369.81
22.7235	112.21				23.059	394.38
22.7565	120.18				23.092	455.97
22.7895	116.13				23.125	525.2
22.8225	116.98				23.158	637.82
22.8555	130.21				23.191	775.82
22.8885	137.7				23.224	894.6
22.9215	148.58				23.257	1069.23
22.9545	170.75				23.29	1272.63
22.9875	182.6				23.323	1476.4
23.0205	193.15				23.356	1687.05
23.0535	236.26				23.389	1735.84
23.0865	276.28				23.422	1829.64
23.1195	328.29				23.455	1828.03
23.1525	422.2				23.488	1726.06
23.1855	524.18				23.521	1567.77
23.2185	664.14				23.554	1335
23.2515	790.07				23.587	1194.19
23.2845	968.42				23.62	1032.23
23.3175	1183.06				23.653	914.62
23.3505	1374.84				23.686	796.6
23.3835	1532.56				23.719	714.29
23.4165	1544.35				23.752	666.73
23.4495	1481.5				23.785	581.29
23.4825	1256.6				23.818	541.82
23.5155	1059.53				23.851	500.4
23.5485	865.86				23.884	461.05
23.5815	731.98				23.917	420.13
23.6145	600				23.95	407.24
23.6475	548.8				23.983	382.56
23.6805	503.43				24.016	342.95
23.7135	446.65				24.049	368.53
23.7465	437.27				24.082	358.44
23.7795	355.98				24.115	330.54
23.8125	304.76				24.148	322.28
23.8455	246.6				24.181	298.72
23.8785	223.05				24.214	309.09
23.9115	212.16				24.247	309.84
23.9445	183.82				24.28	296.66
23.9775	164.79				24.313	286.76
24.0105	153.61				24.346	276.29
24.0435	152.96				24.379	270.11
24.0765	150.3				24.412	278.87
24.1095	145.25				24.445	268.08
24.1425	139.09				24.478	252.27
24.1755	144.01				24.511	261.74
24.2085	128.87				24.544	282.33
24.2415	127.67				24.577	280.48
24.2745	128.97				24.61	281.74
24.3075	130.35				24.643	296.87
24.3405	123.15				24.676	266.38
24.3735	128.51				24.709	247.6
24.4065	135.59				24.742	266.43
24.4395	149.57				24.775	281.95
24.4725	140.63				24.808	294.53
24.5055	132.89				24.841	282.69
24.5385	141.57				24.874	275.6
24.5715	143.49				24.907	279.73
24.6045	147.32				24.94	283.12
24.6375	149.01				24.973	287.56
24.6705	146.08				25.006	275
24.7035	151.33				25.039	277.26
24.7365	148.66				25.072	293.01
24.7695	150.83				25.105	316.11
24.8025	168.4				25.138	323.39
24.8355	161.81				25.171	336.85
24.8685	163.58				25.204	346.61
24.9015	164.28				25.237	360.47
24.9345	172.73				25.27	404.34
24.9675	183.79				25.303	382.41
25.0005	191.12				25.336	402.41
25.0335	194.66				25.369	439.01
25.0665	207.07				25.402	480.85
25.0995	225.23				25.435	511.82
25.1325	236.77				25.468	603.99
25.1655	262.14				25.501	707.94
25.1985	293.89				25.534	890.52
25.2315	330.09				25.567	1019.31
25.2645	377.78				25.6	1318.21
25.2975	433.34				25.633	1721.67
25.3305	498.6				25.666	1992.9
25.3635	557.8				25.699	2321.21
25.3965	649.67				25.732	2671.14
25.4295	778.74				25.765	2969.77
25.4625	938.93				25.798	2971.74
25.4955	1167.3				25.831	2786.29
25.5285	1407.77				25.864	2346.96
25.5615	1646.54				25.897	2127.63
25.5945	1851.96				25.93	1766
25.6275	2012.95				25.963	1295.48
25.6605	2038.03				25.996	1013.67
25.6935	1927.12				26.029	883.34
25.7265	1768.13				26.062	732.33
25.7595	1511.36				26.095	580.29
25.7925	1235.8				26.128	528.03
25.8255	984.72				26.161	480.55
25.8585	763				26.194	426.62
25.8915	637.4				26.227	376.92
25.9245	545.07				26.26	354.82
25.9575	436.9				26.293	340.45
25.9905	373				26.326	324.86
26.0235	331.62				26.359	322.13
26.0565	299.85				26.392	323.72
26.0895	284.58				26.425	311.31
26.1225	250.19				26.458	299
26.1555	244.58				26.491	319.97
26.1885	212.91				26.524	285.42
26.2215	203.74				26.557	293.49
26.2545	208.96				26.59	299.57
26.2875	187.15				26.623	296.15
26.3205	166.96				26.656	296.51
26.3535	196.45				26.689	288.81
26.3865	195.87				26.722	264.04
26.4195	167.37				26.755	297
26.4525	168.75				26.788	317.24
26.4855	170.23				26.821	329.41
26.5185	175.76				26.854	341.49
26.5515	180.59				26.887	323.6
26.5845	169.56				26.92	371.39
26.6175	163.61				26.953	403.93
26.6505	170.18				26.986	406.26
26.6835	183.72				27.019	452.74
26.7165	182.16				27.052	485.84
26.7495	191.04				27.085	533.46
26.7825	209.96				27.118	651.61
26.8155	211.12				27.151	820.57
26.8485	237.07				27.184	1055.27
26.8815	266.09				27.217	1384.53
26.9145	335.14				27.25	1938.29
26.9475	374.26				27.283	2681.85
26.9805	489.78				27.316	3516.45
27.0135	587.91				27.349	4389.84
27.0465	698.74				27.382	4981.39
27.0795	840.58				27.415	4904.85
27.1125	1032.17				27.448	4157.95
27.1455	1325.17				27.481	3213.37
27.1785	1704.5				27.514	2333.05
27.2115	2143.5				27.547	1554.13
27.2445	2601.25				27.58	1084.77
27.2775	2815.99				27.613	813.37
27.3105	2772.56				27.646	651.98
27.3435	2405.8				27.679	548.15
27.3765	1858.82				27.712	445.96
27.4095	1362.42				27.745	402.5
27.4425	951.92				27.778	373.23
27.4755	659.65				27.811	337.87
27.5085	465.75				27.844	325.55
27.5415	336.78				27.877	332.29
27.5745	273.24				27.91	299.91
27.6075	234.53				27.943	273.96
27.6405	200.75				27.976	251.28
27.6735	179.74				28.009	262.7
27.7065	163.52				28.042	246.29
27.7395	154.8				28.075	237.85
27.7725	149.54				28.108	242
27.8055	135.62				28.141	248.82
27.8385	121.93				28.174	253.09
27.8715	117.08				28.207	221.54
27.9045	110.67				28.24	249.4
27.9375	106.76				28.273	246.96
27.9705	109.87				28.306	255.5
28.0035	105.45				28.339	268.61
28.0365	102.86				28.372	238.69
28.0695	105.99				28.405	280.48
28.1025	102.11				28.438	275.3
28.1355	101.73				28.471	277.58
28.1685	99.78				28.504	254.82
28.2015	94.63				28.537	231.96
28.2345	100.26				28.57	231
28.2675	92.86				28.603	231.28
28.3005	84.79				28.636	255.97
28.3335	90.98				28.669	202.75
28.3665	93.81				28.702	206.87
28.3995	89.93				28.735	237.74
28.4325	91.04				28.768	232.36
28.4655	84.25				28.801	227.32
28.4985	89.53				28.834	253.76
28.5315	92.65				28.867	243.26
28.5645	87.2				28.9	247.39
28.5975	88.17				28.933	246.23
28.6305	87.37				28.966	273.91
28.6635	89.87				28.999	244.48
28.6965	91.06				29.032	238.15
28.7295	90.72				29.065	241.34
28.7625	87.87				29.098	240.36
28.7955	89.56				29.131	236.76
28.8285	87.59				29.164	237.59
28.8615	90.69				29.197	245.05
28.8945	90.61				29.23	285.56
28.9275	87.58				29.263	265.9
28.9605	92.55				29.296	279.12
28.9935	98.52				29.329	262.07
29.0265	96.2				29.362	275.34
29.0595	101.74				29.395	279.75
29.0925	99.07				29.428	294.69
29.1255	99.75				29.461	309.51
29.1585	100.1				29.494	302.28
29.1915	101.48				29.527	301.6
29.2245	100.14				29.56	311.09
29.2575	106.5				29.593	273.92
29.2905	119.38				29.626	259.29
29.3235	132.51				29.659	274.1
29.3565	117.83				29.692	263.96
29.3895	139.84				29.725	264.63
29.4225	130.15				29.758	258.21
29.4555	144				29.791	220.86
29.4885	176.22				29.824	217.39
29.5215	164.33				29.857	221.38
29.5545	177.73				29.89	212
29.5875	183.52				29.923	203.4
29.6205	189.57				29.956	172.82
29.6535	185.36				29.989	148.56
29.6865	193.03				30.022	157.29
29.7195	174.14				30.055	164.9
29.7525	180.24				30.088	151.59
29.7855	155.03				30.121	141.86
29.8185	140.72				30.154	144.67
29.8515	144.86				30.187	144.98
29.8845	128.05				30.22	142
29.9175	118.02				30.253	144.28
29.9505	96.91				30.286	141.77
29.9835	87				30.319	132.42
30.0165	83.63				30.352	131.25
30.0495	88.01				30.385	128.27
30.0825	74.5				30.418	136.68
30.1155	67.89				30.451	139.64
30.1485	59.74				30.484	141.6
30.1815	59.86				30.517	122.11
30.2145	63.91				30.55	123.68
30.2475	61.4				30.583	147.66
30.2805	58.3				30.616	124.68
30.3135	54.86				30.649	128.64
30.3465	52.47				30.682	124
30.3795	54.94				30.715	121.78
30.4125	61.04				30.748	113.57
30.4455	62.63				30.781	117.24
30.4785	57.79				30.814	121.52
30.5115	56.45				30.847	116.27
30.5445	56.15				30.88	128.72
30.5775	52.91				30.913	125.1
30.6105	56.19				30.946	113.93
30.6435	62.76				30.979	126.88
30.6765	62.26				31.012	109.33
30.7095	59.08				31.045	123.08
30.7425	58.54				31.078	122.8
30.7755	54.92				31.111	105.66
30.8085	54.54				31.144	118.8
30.8415	57.61				31.177	138.22
30.8745	54.75				31.21	108.49
30.9075	55.78				31.243	147
30.9405	54.31				31.276	107.51
30.9735	55.1				31.309	115.77
31.0065	51.35				31.342	123.7
31.0395	52.96				31.375	131.59
31.0725	57.66				31.408	140.43
31.1055	55.09				31.441	145.62
31.1385	49.82				31.474	125.04
31.1715	54.28				31.507	137.38
31.2045	53.5				31.54	112.42
31.2375	56.31				31.573	121.23
31.2705	60.53				31.606	128.17
31.3035	50.55				31.639	113.73
31.3365	54.07				31.672	137.74
31.3695	59.83				31.705	130.66
31.4025	56.57				31.738	125.57
31.4355	50.78				31.771	102.67
31.4685	59.42				31.804	119.77
31.5015	50				31.837	115.96
31.5345	44.59				31.87	120.6
31.5675	55.86				31.903	123
31.6005	46.5				31.936	119.33
31.6335	55.86				31.969	113.67
31.6665	53.13				32.002	122.64
31.6995	51.4				32.035	127.7
31.7325	49.8				32.068	124.58
31.7655	57.04				32.101	139.78
31.7985	52.9				32.134	123.63
31.8315	45.34				32.167	120.04
31.8645	58.64				32.2	130.7
31.8975	56.82				32.233	131.52
31.9305	59				32.266	132.43
31.9635	55.91				32.299	141.14
31.9965	59.48				32.332	133.18
32.0295	51.03				32.365	127.42
32.0625	50.67				32.398	136.13
32.0955	53.2				32.431	140.46
32.1285	49.33				32.464	143.73
32.1615	54.3				32.497	135.57
32.1945	49.15				32.53	141.22
32.2275	52.57				32.563	141.68
32.2605	56.11				32.596	132.74
32.2935	52.23				32.629	140.94
32.3265	51.38				32.662	141.09
32.3595	52.8				32.695	137.78
32.3925	55.86				32.728	145.78
32.4255	57.49				32.761	156.65
32.4585	59.81				32.794	153.62
32.4915	60.04				32.827	156
32.5245	58.36				32.86	156.76
32.5575	62.88				32.893	151.75
32.5905	62.22				32.926	151.3
32.6235	65.61				32.959	171.03
32.6565	66.28				32.992	172.67
32.6895	65.9				33.025	183.1
32.7225	62.6				33.058	219.49
32.7555	63.6				33.091	254.13
32.7885	71.63				33.124	281.29
32.8215	72.26				33.157	320.2
32.8545	68.57				33.19	359.82
32.8875	71.35				33.223	430.79
32.9205	82.22				33.256	460.71
32.9535	88.74				33.289	428.59
32.9865	96.18				33.322	431.69
33.0195	110.57				33.355	408.72
33.0525	128.27				33.388	416.71
33.0855	143.8				33.421	426.62
33.1185	159.25				33.454	465.35
33.1515	180.78				33.487	498.09
33.1845	190.16				33.52	520.19
33.2175	192				33.553	550.16
33.2505	190.18				33.586	620.78
33.2835	180.47				33.619	694.11
33.3165	182.42				33.652	752.01
33.3495	181.72				33.685	829.73
33.3825	177.43				33.718	920.25
33.4155	181.87				33.751	1051.04
33.4485	200.95				33.784	1002.71
33.4815	216.74				33.817	990.34
33.5145	254.38				33.85	871.9
33.5475	285.79				33.883	789.95
33.5805	331.24				33.916	655.3
33.6135	402.25				33.949	520.03
33.6465	471.63				33.982	455.11
33.6795	545.93				34.015	311.3
33.7125	649.49				34.048	276.09
33.7455	725.24				34.081	211.94
33.7785	724.25				34.114	196.1
33.8115	651.82				34.147	180.8
33.8445	554.12				34.18	141.38
33.8775	452.89				34.213	141.17
33.9105	359.21				34.246	141.15
33.9435	275.44				34.279	160.25
33.9765	207.24				34.312	126.91
34.0095	163.7				34.345	126.3
34.0425	127.1				34.378	132.79
34.0755	98.68				34.411	122.21
34.1085	94.12				34.444	119.77
34.1415	79.13				34.477	113.91
34.1745	82.18				34.51	123.97
34.2075	73.22				34.543	129.47
34.2405	73.36				34.576	125.66
34.2735	58.79				34.609	126.13
34.3065	66.74				34.642	122.81
34.3395	62.98				34.675	112.78
34.3725	61.58				34.708	119.09
34.4055	51.9				34.741	123.34
34.4385	55.9				34.774	120.41
34.4715	66.8				34.807	117.73
34.5045	57.54				34.84	115.76
34.5375	63.62				34.873	113.78
34.5705	66.32				34.906	117.18
34.6035	68.1				34.939	116.5
34.6365	60.99				34.972	126
34.6695	56.16				35.005	135.56
34.7025	66.99				35.038	132.18
34.7355	54.7				35.071	124.2
34.7685	59.94				35.104	128.85
34.8015	60.66				35.137	122.77
34.8345	73.26				35.17	133.28
34.8675	65.99				35.203	147.38
34.9005	63.98				35.236	143.99
34.9335	62.12				35.269	154.83
34.9665	66.21				35.302	177.91
34.9995	69.42				35.335	197.95
35.0325	75.77				35.368	208.46
35.0655	81.83				35.401	251.09
35.0985	86.6				35.434	303.21
35.1315	89.34				35.467	352.63
35.1645	83.59				35.5	385.3
35.1975	99.59				35.533	430.69
35.2305	114.05				35.566	467.53
35.2635	130.55				35.599	473.18
35.2965	147.99				35.632	415.73
35.3295	164.33				35.665	395.57
35.3625	202.29				35.698	336.35
35.3955	228.17				35.731	271.32
35.4285	235.75				35.764	222.25
35.4615	229.19				35.797	209.7
35.4945	220.55				35.83	187.71
35.5275	201.5				35.863	140.69
35.5605	172.05				35.896	136.7
35.5935	143.55				35.929	113.39
35.6265	114.12				35.962	110.62
35.6595	98.51				35.995	110.61
35.6925	87.39				36.028	118
35.7255	73.61				36.061	117.23
35.7585	70.83				36.094	109.89
35.7915	67.41				36.127	91.64
35.8245	59.49				36.16	95.54
35.8575	56.46				36.193	92.93
35.8905	57.2				36.226	100.73
35.9235	57.26				36.259	99.02
35.9565	56.22				36.292	110.54
35.9895	53.34				36.325	105.7
36.0225	53.08				36.358	134.87
36.0555	53.54				36.391	107.42
36.0885	49.06				36.424	87.2
36.1215	51.69				36.457	100.02
36.1545	51.17				36.49	106.93
36.1875	49.9				36.523	87.46
36.2205	42.58				36.556	93.75
36.2535	46.97				36.589	100.66
36.2865	51.37				36.622	116.97
36.3195	49.2				36.655	88.35
36.3525	51.71				36.688	99.71
36.3855	52.34				36.721	98.3
36.4185	53.85				36.754	96.22
36.4515	51.03				36.787	97.75
36.4845	57.02				36.82	85.91
36.5175	43.31				36.853	89.1
36.5505	44.18				36.886	94.19
36.5835	57.58				36.919	85.92
36.6165	51.65				36.952	92.13
36.6495	45				36.985	100.4
36.6825	49.47				37.018	98.06
36.7155	55.87				37.051	108.62
36.7485	57.62				37.084	108.19
36.7815	56.35				37.117	94.26
36.8145	56.12				37.15	93.68
36.8475	52.81				37.183	92.83
36.8805	51.89				37.216	110.5
36.9135	46.2				37.249	99.13
36.9465	57.73				37.282	105.41
36.9795	56.69				37.315	106.61
37.0125	52.88				37.348	109.95
37.0455	45.32				37.381	104.57
37.0785	49.88				37.414	110.17
37.1115	46.05				37.447	99.17
37.1445	55.07				37.48	110.37
37.1775	60.52				37.513	127.59
37.2105	45.84				37.546	112.44
37.2435	61.51				37.579	109.73
37.2765	55.87				37.612	112.52
37.3095	57.41				37.645	115.57
37.3425	57.14				37.678	114.58
37.3755	57.65				37.711	108.48
37.4085	51.29				37.744	111.06
37.4415	58.73				37.777	115.99
37.4745	63.4				37.81	113.64
37.5075	60.96				37.843	121.73
37.5405	61.86				37.876	135.08
37.5735	57.68				37.909	126.41
37.6065	56.62				37.942	118.73
37.6395	62.48				37.975	132.79
37.6725	64.14				38.008	140.43
37.7055	66.08				38.041	137.1
37.7385	71.09				38.074	137.21
37.7715	64.47				38.107	124.63
37.8045	67.4				38.14	141.72
37.8375	74.84				38.173	151.63
37.8705	73.52				38.206	163.35
37.9035	78.34				38.239	157.2
37.9365	77.89				38.272	176.28
37.9695	77.79				38.305	209.3
38.0025	82.53				38.338	222.28
38.0355	93.51				38.371	229.73
38.0685	99.81				38.404	243.9
38.1015	102.11				38.437	242.24
38.1345	101.64				38.47	278.39
38.1675	110.08				38.503	297.59
38.2005	122.99				38.536	314
38.2335	132.91				38.569	323.28
38.2665	151.83				38.602	366.52
38.2995	174.61				38.635	397.76
38.3325	194.13				38.668	453.18
38.3655	222.27				38.701	473.28
38.3985	241.07				38.734	524.3
38.4315	260.58				38.767	548.63
38.4645	300.91				38.8	679.53
38.4975	341.77				38.833	801.18
38.5305	374.28				38.866	880.46
38.5635	406.34				38.899	1107.32
38.5965	462.18				38.932	1303.58
38.6295	493.7				38.965	1502.45
38.6625	531.37				38.998	1840.39
38.6955	595.79				39.031	2021.31
38.7285	695.14				39.064	2039.9
38.7615	814.8				39.097	2014.23
38.7945	935.51				39.13	1969.97
38.8275	1056.22				39.163	1763.29
38.8605	1135.76				39.196	1491.98
38.8935	1207.32				39.229	1234.47
38.9265	1217.31				39.262	1094.67
38.9595	1182.42				39.295	841.55
38.9925	1132.72				39.328	738.67
39.0255	1055.79				39.361	674.82
39.0585	943.8				39.394	612.73
39.0915	786.12				39.427	577.33
39.1245	665.18				39.46	520.18
39.1575	582.01				39.493	451.41
39.1905	468				39.526	422.64
39.2235	402.79				39.559	427.14
39.2565	357.58				39.592	406.56
39.2895	334.3				39.625	404.94
39.3225	319.12				39.658	467.32
39.3555	296.57				39.691	440.72
39.3885	284.62				39.724	408.98
39.4215	289				39.757	395.62
39.4545	282.99				39.79	382.12
39.4875	287.4				39.823	368.73
39.5205	312.11				39.856	367.8
39.5535	320.85				39.889	344.24
39.5865	334.54				39.922	341.78
39.6195	322.1				39.955	333.42
39.6525	329.54				39.988	322.45
39.6855	309.05				40.021	293.88
39.7185	290.31				40.054	307.1
39.7515	283.52				40.087	316.66
39.7845	238.92				40.12	270.06
39.8175	237.15				40.153	265.46
39.8505	218.95				40.186	263.06
39.8835	199.84				40.219	225.99
39.9165	182.99				40.252	205.26
39.9495	173.37				40.285	211.58
39.9825	150.4				40.318	213.77
40.0155	139				40.351	193.17
40.0485	132.04				40.384	179.99
40.0815	123.48				40.417	179.09
40.1145	119.27				40.45	182.15
40.1475	111.18				40.483	184.4
40.1805	97.77				40.516	179
40.2135	104.4				40.549	162.04
40.2465	89.55				40.582	138.31
40.2795	85.46				40.615	141.32
40.3125	80.76				40.648	146.22
40.3455	79.75				40.681	138.93
40.3785	78.43				40.714	134.74
40.4115	73.84				40.747	124.15
40.4445	69.02				40.78	116.85
40.4775	68.25				40.813	134.32
40.5105	71.11				40.846	133.05
40.5435	67.98				40.879	151.27
40.5765	62.82				40.912	111.56
40.6095	59.96				40.945	102.7
40.6425	57.26				40.978	117.28
40.6755	57.85				41.011	135.46
40.7085	54.32				41.044	110.45
40.7415	49.57				41.077	116.6
40.7745	50.38				41.11	108.7
40.8075	52.93				41.143	99.07
40.8405	50.6				41.176	104.08
40.8735	51.54				41.209	94.55
40.9065	51.46				41.242	109.89
40.9395	51.52				41.275	127.75
40.9725	54.82				41.308	122.44
41.0055	52.45				41.341	130.34
41.0385	48.39				41.374	123.15
41.0715	48.86				41.407	100.09
41.1045	54.09				41.44	85.12
41.1375	52.14				41.473	96.32
41.1705	43				41.506	100.07
41.2035	39.29				41.539	100.61
41.2365	44.06				41.572	94.17
41.2695	45.42				41.605	98.24
41.3025	49				41.638	105.67
41.3355	49.94				41.671	87.05
41.3685	49.77				41.704	96.92
41.4015	45.5				41.737	107.78
41.4345	45.92				41.77	105.1
41.4675	46.7				41.803	123.13
41.5005	43.82				41.836	86.33
41.5335	41.17				41.869	94.22
41.5665	51.37				41.902	106.91
41.5995	50.79				41.935	97.15
41.6325	50.65				41.968	80.85
41.6655	41.36				42.001	91.3
41.6985	40.87				42.034	105.99
41.7315	44.23				42.067	90.08
41.7645	45.14				42.1	84.48
41.7975	33.49				42.133	93.94
41.8305	44.15				42.166	91.11
41.8635	44.64				42.199	96.42
41.8965	44.63				42.232	87.73
41.9295	36.64				42.265	79.56
41.9625	44.22				42.298	95.59
41.9955	41.97				42.331	101.75
42.0285	41.89				42.364	102
42.0615	45.11				42.397	92.55
42.0945	44.16				42.43	99.71
42.1275	37.94				42.463	99.09
42.1605	42.3				42.496	102.51
42.1935	39.59				42.529	90.12
42.2265	45.81				42.562	88.97
42.2595	41.73				42.595	84.19
42.2925	51.82				42.628	79.36
42.3255	43.45				42.661	79.63
42.3585	44.04				42.694	100.84
42.3915	44.75				42.727	86.98
42.4245	40.62				42.76	77.23
42.4575	42.78				42.793	76.1
42.4905	43.36				42.826	75.5
42.5235	41.24				42.859	84.5
42.5565	38.52				42.892	85.24
42.5895	40.84				42.925	85.67
42.6225	43.95				42.958	81.32
42.6555	40.1				42.991	81.99
42.6885	43.77				43.024	82.21
42.7215	39.17				43.057	79.21
42.7545	42.79				43.09	87.31
42.7875	41.65				43.123	98.53
42.8205	40.41				43.156	97.23
42.8535	35.24				43.189	82.85
42.8865	45.01				43.222	87.7
42.9195	43.39				43.255	89.42
42.9525	42.05				43.288	80.15
42.9855	43.58				43.321	76.24
43.0185	38.54				43.354	81.8
43.0515	38.66				43.387	87.09
43.0845	39.43				43.42	89.66
43.1175	42.17				43.453	85.39
43.1505	42.85				43.486	83.24
43.1835	38.62				43.519	86
43.2165	38.55				43.552	84.58
43.2495	43.48				43.585	80.18
43.2825	43.79				43.618	80.85
43.3155	41.74				43.651	93.19
43.3485	38.34				43.684	102.03
43.3815	37.01				43.717	87.23
43.4145	40.06				43.75	83.71
43.4475	41.08				43.783	93.02
43.4805	39.17				43.816	87.53
43.5135	39.38				43.849	81.51
43.5465	39.75				43.882	86.84
43.5795	39.85				43.915	97.64
43.6125	38.52				43.948	74.26
43.6455	35.7				43.981	89.12
43.6785	38.46				44.014	90.75
43.7115	38.58				44.047	97.38
43.7445	36.98				44.08	98.62
43.7775	38.08				44.113	73.67
43.8105	34.06				44.146	96.11
43.8435	35.74				44.179	98.18
43.8765	35.64				44.212	101.78
43.9095	34.67				44.245	95.06
43.9425	35.47				44.278	98.01
43.9755	38.08				44.311	99.99
44.0085	42.61				44.344	91.17
44.0415	38.83				44.377	69.7
44.0745	34.3				44.41	79.51
44.1075	39.84				44.443	85.66
44.1405	41.78				44.476	90.65
44.1735	43.59				44.509	79.07
44.2065	41.07				44.542	99.72
44.2395	46.67				44.575	91.29
44.2725	41.24				44.608	93.52
44.3055	42.14				44.641	101.8
44.3385	40.98				44.674	88.47
44.3715	40.03				44.707	100.31
44.4045	41.24				44.74	94.71
44.4375	35.91				44.773	75.85
44.4705	39.06				44.806	94.51
44.5035	39.04				44.839	91.3
44.5365	44.93				44.872	76.54
44.5695	39.61				44.905	76.83
44.6025	33.89				44.938	90.05
44.6355	37.05				44.971	92.52
44.6685	36.6				45.004	94.18
44.7015	39.79				45.037	98.58
44.7345	37.77				45.07	92.97
44.7675	47.1				45.103	92.07
44.8005	39.9				45.136	98.42
44.8335	39.9				45.169	108.31
44.8665	48.15				45.202	98.3
44.8995	46.94				45.235	88.44
44.9325	41.54				45.268	89.51
44.9655	47.91				45.301	98.99
44.9985	47				45.334	110.62
45.0315	40.79				45.367	100.86
45.0645	43.74				45.4	96.19
45.0975	48.79				45.433	100
45.1305	51.82				45.466	104.41
45.1635	45.46				45.499	115
45.1965	46.85				45.532	128.89
45.2295	51.68				45.565	129.84
45.2625	53.08				45.598	143.52
45.2955	52.34				45.631	166.42
45.3285	46.23				45.664	176.18
45.3615	44.52				45.697	197.8
45.3945	51				45.73	243.8
45.4275	50.16				45.763	308.3
45.4605	57.8				45.796	381.67
45.4935	65.22				45.829	474.09
45.5265	67.62				45.862	537
45.5595	69.66				45.895	528.88
45.5925	75.77				45.928	498.42
45.6255	86.52				45.961	466.47
45.6585	106.22				45.994	440.37
45.6915	120.51				46.027	398.66
45.7245	137.39				46.06	370.44
45.7575	172.36				46.093	315.76
45.7905	225.33				46.126	306.74
45.8235	269.86				46.159	297.71
45.8565	301.79				46.192	333.29
45.8895	318.35				46.225	396.25
45.9225	325.49				46.258	436.04
45.9555	326.52				46.291	504.41
45.9885	315.87				46.324	517.45
46.0215	300.79				46.357	558.96
46.0545	291.03				46.39	599.27
46.0875	284.45				46.423	588.12
46.1205	289.48				46.456	615.41
46.1535	302.81				46.489	565.72
46.1865	322.51				46.522	517.75
46.2195	329.03				46.555	485.77
46.2525	326.36				46.588	428.57
46.2855	334.66				46.621	351.15
46.3185	325.34				46.654	330.43
46.3515	292.56				46.687	276.58
46.3845	257.18				46.72	259.23
46.4175	248.1				46.753	235.42
46.4505	227.53				46.786	225.09
46.4835	198.57				46.819	205.71
46.5165	180.95				46.852	196.01
46.5495	165.77				46.885	148.12
46.5825	147.17				46.918	163.92
46.6155	153.21				46.951	178.73
46.6485	154.84				46.984	159.61
46.6815	149.69				47.017	139.86
46.7145	141.61				47.05	177.72
46.7475	131.55				47.083	145.53
46.7805	122.24				47.116	124.62
46.8135	115.25				47.149	141.13
46.8465	92.07				47.182	133.17
46.8795	83.49				47.215	134.64
46.9125	92.81				47.248	135.87
46.9455	92.97				47.281	117.17
46.9785	78.27				47.314	122.43
47.0115	69.19				47.347	115.7
47.0445	66.74				47.38	117.27
47.0775	57.42				47.413	97.87
47.1105	64.83				47.446	88.24
47.1435	53.31				47.479	90.9
47.1765	56.1				47.512	93.53
47.2095	49.32				47.545	101.55
47.2425	70.87				47.578	110.68
47.2755	58.98				47.611	101.33
47.3085	50.7				47.644	93.42
47.3415	49.91				47.677	84.26
47.3745	55.93				47.71	100.36
47.4075	52.8				47.743	112.39
47.4405	47.62				47.776	102.01
47.4735	45.88				47.809	92.08
47.5065	45.51				47.842	91.92
47.5395	47.85				47.875	99.28
47.5725	48.28				47.908	111
47.6055	44.71				47.941	99.72
47.6385	45.42				47.974	90.18
47.6715	38.83				48.007	106.02
47.7045	40.97				48.04	128.3
47.7375	41.92				48.073	126.51
47.7705	50.52				48.106	122.32
47.8035	50				48.139	126
47.8365	52.06				48.172	131.14
47.8695	64.73				48.205	130.48
47.9025	56.02				48.238	131.36
47.9355	56.94				48.271	141.81
47.9685	49.14				48.304	139.51
48.0015	51				48.337	133.35
48.0345	56.18				48.37	132.37
48.0675	62.43				48.403	137.52
48.1005	67.43				48.436	151.07
48.1335	73.71				48.469	149.19
48.1665	68.31				48.502	141.61
48.1995	57.3				48.535	143.25
48.2325	58.75				48.568	146.64
48.2655	63.99				48.601	140.05
48.2985	67.55				48.634	134.4
48.3315	62.87				48.667	139.8
48.3645	60.07				48.7	126.5
48.3975	61.52				48.733	124.29
48.4305	64.24				48.766	136.3
48.4635	63.97				48.799	140.69
48.4965	67.35				48.832	125.05
48.5295	65.08				48.865	131.24
48.5625	69.38				48.898	142.42
48.5955	69.01				48.931	140.29
48.6285	70.14				48.964	121.01
48.6615	81.89				48.997	140.96
48.6945	88.58				49.03	162.11
48.7275	95.06				49.063	170.81
48.7605	101.99				49.096	193.97
48.7935	108.95				49.129	218.82
48.8265	117.57				49.162	234.57
48.8595	118.85				49.195	390.03
48.8925	120.09				49.228	490.1
48.9255	130.88				49.261	680.54
48.9585	148.01				49.294	868.77
48.9915	171.69				49.327	931.28
49.0245	204.59				49.36	785.05
49.0575	241.33				49.393	655.5
49.0905	284.45				49.426	583.12
49.1235	359.91				49.459	555.24
49.1565	426.47				49.492	427.98
49.1895	435.93				49.525	312.46
49.2225	427.71				49.558	227.42
49.2555	387.77				49.591	195.9
49.2885	343.4				49.624	189.25
49.3215	289.12				49.657	149.29
49.3545	248.66				49.69	142.34
49.3875	205.26				49.723	129.12
49.4205	160.18				49.756	128.91
49.4535	130.06				49.789	123.63
49.4865	108.91				49.822	126.53
49.5195	90.52				49.855	127
49.5525	72.82				49.888	116.72
49.5855	70.18				49.921	137.8
49.6185	65.65				49.954	122.04
49.6515	71.32				49.987	126.19
49.6845	66.32				50.02	118.32
49.7175	63.43				50.053	107.27
49.7505	65.96				50.086	113.59
49.7835	61.19				50.119	109.85
49.8165	57.82				50.152	108.76
49.8495	62.2				50.185	97.85
49.8825	61.13				50.218	99.84
49.9155	64.53				50.251	114.92
49.9485	60.66				50.284	106.6
49.9815	73.02				50.317	92.69
50.0145	67.09				50.35	105.32
50.0475	56.38				50.383	109
50.0805	60.14				50.416	117.48
50.1135	53.74				50.449	110.16
50.1465	58.59				50.482	99.22
50.1795	58.8				50.515	109.34
50.2125	61.42				50.548	100.69
50.2455	59.34				50.581	98.87
50.2785	59.47				50.614	108.47
50.3115	60.44				50.647	95.71
50.3445	62.41				50.68	92.86
50.3775	55.94				50.713	96.75
50.4105	64.56				50.746	94.53
50.4435	62.89				50.779	97.58
50.4765	61.43				50.812	106.54
50.5095	60.96				50.845	109.08
50.5425	65.99				50.878	103.09
50.5755	61.91				50.911	108.91
50.6085	70.96				50.944	115.29
50.6415	67.38				50.977	127.39
50.6745	67.57				51.01	139.31
50.7075	63.04				51.043	138.12
50.7405	64.84				51.076	152.21
50.7735	59.1				51.109	162.17
50.8065	61.3				51.142	178.39
50.8395	73.79				51.175	185.09
50.8725	74.11				51.208	176.46
50.9055	77.95				51.241	165.47
50.9385	83.61				51.274	176.13
50.9715	82.35				51.307	162.43
51.0045	87.25				51.34	155.69
51.0375	83.43				51.373	150.31
51.0705	91.89				51.406	152.42
51.1035	91.74				51.439	141.69
51.1365	86.36				51.472	139
51.1695	87.4				51.505	141.29
51.2025	85.52				51.538	138.33
51.2355	83.08				51.571	136
51.2685	85.19				51.604	133.4
51.3015	85.51				51.637	124.12
51.3345	84				51.67	124.99
51.3675	84.52				51.703	116.03
51.4005	87.55				51.736	163.68
51.4335	86.24				51.769	140.77
51.4665	76.59				51.802	150.51
51.4995	79.23				51.835	141.44
51.5325	92.15				51.868	152.51
51.5655	95.11				51.901	148.26
51.5985	92.95				51.934	151.95
51.6315	87.23				51.967	164.06
51.6645	84.55				52	164.09
51.6975	86.34				52.033	145.96
51.7305	82.89				52.066	145.11
51.7635	84.58				52.099	150.15
51.7965	82.75				52.132	164.96
51.8295	80.99				52.165	158.11
51.8625	83.29				52.198	180.36
51.8955	81.76				52.231	178.12
51.9285	83.13				52.264	179.89
51.9615	80.39				52.297	181.87
51.9945	81.21				52.33	215.17
52.0275	86.25				52.363	255.26
52.0605	81.3				52.396	259
52.0935	78.05				52.429	296.11
52.1265	77.84				52.462	303.61
52.1595	80.43				52.495	322.02
52.1925	91.64				52.528	353.75
52.2255	76.73				52.561	347.34
52.2585	88.73				52.594	331.87
52.2915	103.79				52.627	357.27
52.3245	105.35				52.66	319.48
52.3575	110.55				52.693	311.13
52.3905	133.59				52.726	308.15
52.4235	144.24				52.759	275.2
52.4565	134.33				52.792	278.4
52.4895	142.36				52.825	288.85
52.5225	146.44				52.858	275.18
52.5555	149.36				52.891	257.69
52.5885	156.16				52.924	250.92
52.6215	158.42				52.957	234.33
52.6545	147.02				52.99	229.01
52.6875	145.27				53.023	218.85
52.7205	140.48				53.056	228.44
52.7535	146.74				53.089	239.52
52.7865	150.32				53.122	230.49
52.8195	140.02				53.155	212.5
52.8525	140.91				53.188	186.03
52.8855	143.6				53.221	197.37
52.9185	148.25				53.254	207.05
52.9515	148.75				53.287	192.12
52.9845	139.9				53.32	182.29
53.0175	115.74				53.353	204.89
53.0505	124.75				53.386	205.29
53.0835	128.8				53.419	195.09
53.1165	127.42				53.452	208.44
53.1495	135.83				53.485	207.21
53.1825	117.27				53.518	212.73
53.2155	113.37				53.551	217.29
53.2485	110.24				53.584	197.41
53.2815	111.32				53.617	188.28
53.3145	125.57				53.65	194
53.3475	123.53				53.683	208.92
53.3805	124.63				53.716	219.28
53.4135	110.39				53.749	206.67
53.4465	108.09				53.782	207.23
53.4795	105.84				53.815	192
53.5125	101.14				53.848	205.6
53.5455	112.17				53.881	226.76
53.5785	108.5				53.914	213.8
53.6115	101.13				53.947	199.94
53.6445	100.75				53.98	185.37
53.6775	108.16				54.013	205.15
53.7105	112.91				54.046	202.27
53.7435	117.73				54.079	174.56
53.7765	124.09				54.112	205.28
53.8095	114.48				54.145	200.29
53.8425	110.71				54.178	190.15
53.8755	119.96				54.211	180.77
53.9085	120.82				54.244	160.89
53.9415	125.74				54.277	172.69
53.9745	127.48				54.31	136.66
54.0075	121.95				54.343	173.14
54.0405	124.96				54.376	156.17
54.0735	134.28				54.409	151
54.1065	145.35				54.442	152.12
54.1395	146.14				54.475	158.61
54.1725	141.17				54.508	135
54.2055	138.93				54.541	114.67
54.2385	140.28				54.574	123.49
54.2715	145.33				54.607	130.85
54.3045	140.03				54.64	127.49
54.3375	129.74				54.673	114.31
54.3705	130.05				54.706	126.91
54.4035	130.64				54.739	119.01
54.4365	114.82				54.772	117.03
54.4695	110.29				54.805	96.56
54.5025	111.29				54.838	108.49
54.5355	105.66				54.871	108.05
54.5685	93.23				54.904	136.06
54.6015	89.9				54.937	129.7
54.6345	101.49				54.97	138.1
54.6675	106.49				55.003	177.59
54.7005	96.85				55.036	197.93
54.7335	97.39				55.069	211.34
54.7665	108.5				55.102	262.85
54.7995	119.06				55.135	319.27
54.8325	121.48				55.168	349.69
54.8655	132.99				55.201	411.51
54.8985	137.43				55.234	458.79
54.9315	143.88				55.267	502.84
54.9645	166.95				55.3	483
54.9975	197.22				55.333	444.93
55.0305	226.43				55.366	426.9
55.0635	256.69				55.399	403.12
55.0965	276.02				55.432	359.34
55.1295	285.38				55.465	320.78
55.1625	301.05				55.498	298.26
55.1955	301.76				55.531	242.25
55.2285	276.38				55.564	219.32
55.2615	239.05				55.597	190.19
55.2945	239.05				55.63	175.34
55.3275	203.92				55.663	179.51
55.3605	176.4				55.696	176.94
55.3935	153.09				55.729	151.7
55.4265	130.92				55.762	133.15
55.4595	109.77				55.795	130.59
55.4925	99.54				55.828	133.33
55.5255	98.39				55.861	134.43
55.5585	85.32				55.894	137.89
55.5915	93.13				55.927	137.2
55.6245	89.08				55.96	145.68
55.6575	81.37				55.993	151.85
55.6905	76.35				56.026	157.61
55.7235	75.6				56.059	158.62
55.7565	88.93				56.092	156.24
55.7895	84.51				56.125	155.99
55.8225	91.94				56.158	154.37
55.8555	91.53				56.191	162.44
55.8885	95.7				56.224	182.77
55.9215	98.35				56.257	206.91
55.9545	100.76				56.29	235.95
55.9875	94.93				56.323	292.4
56.0205	102.08				56.356	318
56.0535	114.34				56.389	370.08
56.0865	120.58				56.422	422.98
56.1195	136.13				56.455	410.29
56.1525	153.06				56.488	420.14
56.1855	157.75				56.521	436.57
56.2185	178.56				56.554	399.75
56.2515	205.74				56.587	359.73
56.2845	222.13				56.62	333.66
56.3175	231.38				56.653	300.06
56.3505	228.18				56.686	256.89
56.3835	209.88				56.719	221
56.4165	184.09				56.752	197.68
56.4495	169.94				56.785	183.21
56.4825	157.92				56.818	186.63
56.5155	144.75				56.851	192.07
56.5485	127.04				56.884	174.71
56.5815	106.83				56.917	191.51
56.6145	101.95				56.95	190.97
56.6475	104.61				56.983	203.25
56.6805	97.37				57.016	205.7
56.7135	94.22				57.049	172.98
56.7465	97.37				57.082	205.41
56.7795	89.68				57.115	218
56.8125	89.41				57.148	216.41
56.8455	95.55				57.181	197.57
56.8785	102.57				57.214	207.61
56.9115	107.13				57.247	238.98
56.9445	109.89				57.28	263.07
56.9775	108.69				57.313	227.51
57.0105	118.94				57.346	267.99
57.0435	130.94				57.379	272.94
57.0765	136.4				57.412	288.59
57.1095	144.61				57.445	286.11
57.1425	150.28				57.478	262.27
57.1755	154.19				57.511	315.33
57.2085	173.33				57.544	302.37
57.2415	175.72				57.577	342.01
57.2745	187.4				57.61	328.92
57.3075	188.2				57.643	334.09
57.3405	209.85				57.676	327.14
57.3735	212.91				57.709	334.61
57.4065	238.48				57.742	311.4
57.4395	231.23				57.775	373.01
57.4725	238.18				57.808	362.96
57.5055	268.63				57.841	321.54
57.5385	260.74				57.874	328.95
57.5715	272.97				57.907	338.49
57.6045	273.45				57.94	323.01
57.6375	256.35				57.973	299.01
57.6705	261.15				58.006	301.96
57.7035	257.44				58.039	291.05
57.7365	254.52				58.072	293.22
57.7695	241.78				58.105	277.56
57.8025	214.27				58.138	271.39
57.8355	216.77				58.171	276.79
57.8685	200.21				58.204	267.59
57.9015	205.04				58.237	273.85
57.9345	196.9				58.27	265.14
57.9675	168.38				58.303	274.73
58.0005	172.96				58.336	278.79
58.0335	169.31				58.369	264.06
58.0665	157.07				58.402	250.45
58.0995	167.92				58.435	250.66
58.1325	157.71				58.468	256.28
58.1655	149.62				58.501	252.43
58.1985	154.87				58.534	272.51
58.2315	169.93				58.567	281.83
58.2645	166.85				58.6	297.97
58.2975	167.36				58.633	326.05
58.3305	180.34				58.666	329.51
58.3635	184.47				58.699	359.34
58.3965	192.35				58.732	422.48
58.4295	212.96				58.765	465.21
58.4625	224.55				58.798	519.36
58.4955	242.96				58.831	597.41
58.5285	262.29				58.864	644.99
58.5615	290.74				58.897	706.51
58.5945	329.11				58.93	746.24
58.6275	368.4				58.963	721.58
58.6605	357.04				58.996	718.21
58.6935	376.45				59.029	693.24
58.7265	395.31				59.062	629.7
58.7595	421.04				59.095	593.82
58.7925	421.17				59.128	525.35
58.8255	407.64				59.161	417.16
58.8585	372.64				59.194	360.91
58.8915	343.19				59.227	336.2
58.9245	312.13				59.26	282.27
58.9575	265.5				59.293	232.65
58.9905	238.15				59.326	210.14
59.0235	224.02				59.359	197.09
59.0565	197.57				59.392	187.73
59.0895	166.69				59.425	161.34
59.1225	137.08				59.458	149.29
59.1555	117.35				59.491	156.51
59.1885	105.24				59.524	145.83
59.2215	90.55				59.557	146.03
59.2545	84.27				59.59	124.28
59.2875	81.43				59.623	124.72
59.3205	75.99				59.656	116.92
59.3535	74.84				59.689	123.9
59.3865	74.73				59.722	122.64
59.4195	74.24				59.755	118.85
59.4525	67.61				59.788	116.16
59.4855	63.25				59.821	104.88
59.5185	64.18				59.854	119.75
59.5515	59.83				59.887	89.79
59.5845	57.35				59.92	118.77
59.6175	56.68				59.953	102.01
59.6505	59.63				59.986	108.92
59.6835	57.22				60.019	98.27
59.7165	64.44				60.052	116.3
59.7495	62.91				60.085	96.09
59.7825	59.49				60.118	102.5
59.8155	59.4				60.151	122.43
59.8485	67.21				60.184	106.66
59.8815	56.11				60.217	105
59.9145	53.09				60.25	100.56
59.9475	57.18				60.283	114
59.9805	55.29				60.316	93.59
60.0135	56.83				60.349	99.34
60.0465	58.92				60.382	106.02
60.0795	64.56				60.415	107
60.1125	55.39				60.448	99.7
60.1455	63.9				60.481	109.18
60.1785	60.31				60.514	122.22
60.2115	59.1				60.547	112.62
60.2445	63.76				60.58	112.04
60.2775	53.38				60.613	98.78
60.3105	47.43				60.646	110.92
60.3435	50.09				60.679	95.31
60.3765	50.91				60.712	84.87
60.4095	54.5				60.745	93.77
60.4425	51.2				60.778	97.31
60.4755	57.73				60.811	95.66
60.5085	51.17				60.844	98.3
60.5415	48.36				60.877	93.53
60.5745	60.79				60.91	93.17
60.6075	49.59				60.943	101.84
60.6405	49.66				60.976	110.26
60.6735	52.62				61.009	112.4
60.7065	52.53				61.042	107.33
60.7395	46.19				61.075	110.86
60.7725	47.37				61.108	112.09
60.8055	61.4				61.141	101.36
60.8385	53.68				61.174	93.93
60.8715	49.77				61.207	100.81
60.9045	49.94				61.24	113.08
60.9375	50.05				61.273	113.05
60.9705	49.77				61.306	101.24
61.0035	57.54				61.339	109.52
61.0365	48.75				61.372	121.97
61.0695	54.8				61.405	117.78
61.1025	53.93				61.438	118.7
61.1355	52.59				61.471	117
61.1685	54.56				61.504	111.71
61.2015	61.13				61.537	107.94
61.2345	57.87				61.57	110.18
61.2675	55.16				61.603	107.69
61.3005	59.51				61.636	111.15
61.3335	63.01				61.669	108.75
61.3665	66.94				61.702	114.33
61.3995	63.83				61.735	112.77
61.4325	65.7				61.768	101.58
61.4655	66.07				61.801	93.45
61.4985	64.54				61.834	109.84
61.5315	69				61.867	111.2
61.5645	78.86				61.9	105.43
61.5975	78.24				61.933	104.95
61.6305	75.77				61.966	130.25
61.6635	76.23				61.999	115.56
61.6965	81.03				62.032	128.32
61.7295	87.21				62.065	114.19
61.7625	84.27				62.098	118.77
61.7955	87.63				62.131	132.67
61.8285	87.58				62.164	118.93
61.8615	81.1				62.197	132.6
61.8945	82.47				62.23	118.26
61.9275	88.15				62.263	118.03
61.9605	90.89				62.296	106.21
61.9935	82.58				62.329	133.27
62.0265	85.01				62.362	125.37
62.0595	88.31				62.395	118.79
62.0925	87.16				62.428	129.84
62.1255	89.83				62.461	127
62.1585	82.78				62.494	127.14
62.1915	81.21				62.527	131.83
62.2245	76.41				62.56	121.01
62.2575	76.18				62.593	124.96
62.2905	71.88				62.626	116.21
62.3235	73.93				62.659	115.04
62.3565	70.18				62.692	138.8
62.3895	66				62.725	141.88
62.4225	69				62.758	139.22
62.4555	66.98				62.791	128.95
62.4885	73.2				62.824	124.39
62.5215	74.09				62.857	124.89
62.5545	70.65				62.89	121.5
62.5875	64.78				62.923	122.73
62.6205	70.44				62.956	121.3
62.6535	74.66				62.989	123.51
62.6865	69.4				63.022	125.65
62.7195	66.6				63.055	125.19
62.7525	69.66				63.088	115.4
62.7855	71.73				63.121	124.81
62.8185	69.79				63.154	118.7
62.8515	75.39				63.187	112.19
62.8845	59.33				63.22	128.24
62.9175	58.27				63.253	125.89
62.9505	69.91				63.286	119.38
62.9835	62.31				63.319	115.15
63.0165	62.8				63.352	115.4
63.0495	67.7				63.385	124.24
63.0825	55.71				63.418	103.07
63.1155	72.3				63.451	106.87
63.1485	70.05				63.484	121.48
63.1815	69.32				63.517	116.1
63.2145	69.3				63.55	114.12
63.2475	61.4				63.583	112.95
63.2805	61.22				63.616	125.95
63.3135	73.1				63.649	133.07
63.3465	72.3				63.682	128.71
63.3795	72.72				63.715	127
63.4125	64.51				63.748	133.57
63.4455	69.1				63.781	128.84
63.4785	70.3				63.814	133.05
63.5115	70.35				63.847	146.53
63.5445	77.58				63.88	142.04
63.5775	78.82				63.913	144.23
63.6105	76.23				63.946	144.51
63.6435	85.26				63.979	143.26
63.6765	83.5				64.012	144.97
63.7095	76.64				64.045	140.2
63.7425	78.05				64.078	140.27
63.7755	87.11				64.111	142.84
63.8085	87.92				64.144	163.56
63.8415	86.4				64.177	165.55
63.8745	90.51				64.21	165.18
63.9075	86.38				64.243	175.79
63.9405	95.46				64.276	182.45
63.9735	91.41				64.309	191.33
64.0065	87.59				64.342	220.94
64.0395	100.46				64.375	257.11
64.0725	110.07				64.408	240.79
64.1055	117.86				64.441	299.2
64.1385	122.43				64.474	321.19
64.1715	141.12				64.507	343.64
64.2045	141.75				64.54	389.26
64.2375	143.85				64.573	484.62
64.2705	171.41				64.606	491.04
64.3035	198.9				64.639	467.44
64.3365	218.09				64.672	491.88
64.3695	232.71				64.705	454.21
64.4025	243.58				64.738	431.62
64.4355	259.87				64.771	403.14
64.4685	273.46				64.804	392.14
64.5015	269.92				64.837	386.61
64.5345	268.32				64.87	376.13
64.5675	262.7				64.903	317.84
64.6005	246.93				64.936	322.97
64.6335	246.59				64.969	299.58
64.6665	241.98				65.002	264.01
64.6995	228.87				65.035	319.35
64.7325	232.09				65.068	306.3
64.7655	234.3				65.101	267.03
64.7985	224.63				65.134	268.47
64.8315	220.26				65.167	296.99
64.8645	209.76				65.2	293.04
64.8975	212.33				65.233	312.57
64.9305	200.79				65.266	274.37
64.9635	195.95				65.299	285.39
64.9965	194.19				65.332	243.68
65.0295	190.17				65.365	251.21
65.0625	183.68				65.398	197.09
65.0955	178.45				65.431	223.59
65.1285	165.36				65.464	214.54
65.1615	146.88				65.497	188.44
65.1945	127.58				65.53	198.83
65.2275	131.95				65.563	198.44
65.2605	125.6				65.596	198
65.2935	111.11				65.629	168.24
65.3265	114.88				65.662	134.32
65.3595	98.33				65.695	156.05
65.3925	95.4				65.728	135.39
65.4255	91.37				65.761	152.06
65.4585	88.81				65.794	159
65.4915	90.5				65.827	154.5
65.5245	81.35				65.86	171.45
65.5575	87.85				65.893	148.25
65.5905	81.96				65.926	119.89
65.6235	83.3				65.959	130.51
65.6565	83.26				65.992	122.19
65.6895	81.14				66.025	131.87
65.7225	69.39				66.058	140
65.7555	69.99				66.091	130.9
65.7885	61.88				66.124	126.64
65.8215	62.94				66.157	134.49
65.8545	64.32				66.19	134.72
65.8875	63.1				66.223	123.01
65.9205	66.21				66.256	115.83
65.9535	59.86				66.289	109.84
65.9865	57.9				66.322	97.58
66.0195	70.97				66.355	93.19
66.0525	58.56				66.388	105.18
66.0855	67.1				66.421	101.44
66.1185	65.42				66.454	95.62
66.1515	59.82				66.487	102.49
66.1845	63.08				66.52	98.66
66.2175	60.96				66.553	89.69
66.2505	56.05				66.586	85.54
66.2835	57.13				66.619	91.71
66.3165	58.29				66.652	95.65
66.3495	68.72				66.685	99.29
66.3825	58.38				66.718	99.72
66.4155	62.96				66.751	82.79
66.4485	65.75				66.784	85.92
66.4815	62.75				66.817	90.49
66.5145	63.53				66.85	91.92
66.5475	64.16				66.883	91.38
66.5805	67.53				66.916	93.67
66.6135	67.93				66.949	92.68
66.6465	65.86				66.982	95.08
66.6795	67.07				67.015	103.48
66.7125	62.89				67.048	103.89
66.7455	68.96				67.081	94.11
66.7785	68.05				67.114	93.38
66.8115	64.01				67.147	104.53
66.8445	63.57				67.18	102.56
66.8775	69.77				67.213	113.64
66.9105	73.34				67.246	115.13
66.9435	75.26				67.279	87.14
66.9765	77.5				67.312	100.18
67.0095	79.45				67.345	119
67.0425	85.32				67.378	119.63
67.0755	92.18				67.411	127.46
67.1085	91.11				67.444	154.66
67.1415	96.48				67.477	159.95
67.1745	115.53				67.51	167.85
67.2075	122.19				67.543	178.36
67.2405	127.8				67.576	211.73
67.2735	141.23				67.609	220.95
67.3065	152.09				67.642	233.67
67.3395	151.65				67.675	229.67
67.3725	152.48				67.708	266.73
67.4055	164.66				67.741	257.81
67.4385	171				67.774	246.86
67.4715	160.12				67.807	219.22
67.5045	162.96				67.84	179.82
67.5375	158.85				67.873	196.41
67.5705	152.12				67.906	171.23
67.6035	143.85				67.939	143.63
67.6365	142.22				67.972	155.94
67.6695	132.55				68.005	146
67.7025	116.27				68.038	132.35
67.7355	112.28				68.071	118.52
67.7685	105.83				68.104	104.7
67.8015	88.55				68.137	92.61
67.8345	76.31				68.17	96.12
67.8675	78.2				68.203	106.25
67.9005	70.11				68.236	88.96
67.9335	60.06				68.269	85.82
67.9665	62.19				68.302	94.03
67.9995	54.81				68.335	81.78
68.0325	55.52				68.368	74.89
68.0655	47.72				68.401	80.88
68.0985	39.4				68.434	69.46
68.1315	45.48				68.467	62.78
68.1645	44.99				68.5	73.63
68.1975	42.43				68.533	66.57
68.2305	43.85				68.566	78.13
68.2635	36.05				68.599	71.22
68.2965	36.01				68.632	59.59
68.3295	29.79				68.665	72.26
68.3625	40.74				68.698	71.54
68.3955	49.08				68.731	78.49
68.4285	39.99				68.764	86.25
68.4615	43.51				68.797	77.81
68.4945	41.8				68.83	69
68.5275	35.55				68.863	64.65
68.5605	44.5				68.896	67.03
68.5935	35.51				68.929	62.69
68.6265	34.3				68.962	63.6
68.6595	38.85				68.995	65.78
68.6925	37.16				69.028	63.52
68.7255	38.81				69.061	70.14
68.7585	42.39				69.094	68.51
68.7915	39.62				69.127	62.46
68.8245	34.07				69.16	68.74
68.8575	34.56				69.193	68
68.8905	33.91				69.226	67.28
68.9235	31.19				69.259	73.69
68.9565	34.93				69.292	80.04
68.9895	34.59				69.325	99.63
69.0225	42.1				69.358	106.43
69.0555	38.64				69.391	108.79
69.0885	34.82				69.424	117.05
69.1215	37.92				69.457	126.13
69.1545	40.5				69.49	174.21
69.1875	47				69.523	176.63
69.2205	48.45				69.556	178.43
69.2535	47.82				69.589	215.79
69.2865	48.61				69.622	219.62
69.3195	58.24				69.655	204.62
69.3525	61.94				69.688	179.1
69.3855	66.73				69.721	173.22
69.4185	82.35				69.754	166.81
69.4515	96.57				69.787	158.91
69.4845	108.48				69.82	168.37
69.5175	120.86				69.853	136.87
69.5505	124.33				69.886	112.85
69.5835	116.21				69.919	134.04
69.6165	106.4				69.952	106.58
69.6495	107.16				69.985	120.84
69.6825	109.67				70.018	104.15
69.7155	109.37				70.051	104.07
69.7485	102.08				70.084	99.2
69.7815	96.99				70.117	106.61
69.8145	101.59				70.15	94.91
69.8475	93.1				70.183	96.13
69.8805	88.06				70.216	118.82
69.9135	82.37				70.249	102.32
69.9465	78.44				70.282	90.65
69.9795	73.39				70.315	83.47
70.0125	63.01				70.348	98
70.0455	70.13				70.381	97.95
70.0785	69.43				70.414	90.05
70.1115	58.89				70.447	96.87
70.1445	56.73				70.48	105.71
70.1775	57.85				70.513	89.75
70.2105	55.97				70.546	91.83
70.2435	54.49				70.579	96.65
70.2765	54.07				70.612	97.92
70.3095	55.06				70.645	93.47
70.3425	52.03				70.678	109.06
70.3755	59.54				70.711	83.73
70.4085	56.02				70.744	91.27
70.4415	52.19				70.777	95.56
70.4745	53.18				70.81	76.64
70.5075	50.15				70.843	78.8
70.5405	52.4				70.876	72.65
70.5735	50.49				70.909	82.25
70.6065	43.57				70.942	95.29
70.6395	54.23				70.975	87.88
70.6725	47.9				71.008	90.36
70.7055	44.68				71.041	68.65
70.7385	50.8				71.074	67.67
70.7715	46.72				71.107	89.66
70.8045	43.86				71.14	69.82
70.8375	46.27				71.173	85.7
70.8705	48.22				71.206	92.17
70.9035	44.13				71.239	79.16
70.9365	47.93				71.272	85.97
70.9695	44.86				71.305	92.65
71.0025	44.8				71.338	94.28
71.0355	46.81				71.371	101.27
71.0685	41.61				71.404	105
71.1015	50.43				71.437	108.61
71.1345	51.74				71.47	108.06
71.1675	51.8				71.503	95.05
71.2005	49.92				71.536	104.47
71.2335	48.47				71.569	118.55
71.2665	44.35				71.602	109.85
71.2995	53.93				71.635	104.1
71.3325	53.88				71.668	107.03
71.3655	51.81				71.701	118.01
71.3985	48.3				71.734	111.41
71.4315	47.6				71.767	86.87
71.4645	47.88				71.8	91.95
71.4975	56.14				71.833	112.85
71.5305	55.5				71.866	116.06
71.5635	47.73				71.899	109.73
71.5965	46.54				71.932	99.35
71.6295	49.71				71.965	92.99
71.6625	45.23				71.998	102.39
71.6955	41.33				72.031	111.23
71.7285	41.81				72.064	119.94
71.7615	44.01				72.097	107.51
71.7945	45.73				72.13	98.31
71.8275	46.2				72.163	90.41
71.8605	46.2				72.196	91.53
71.8935	44.88				72.229	106.3
71.9265	47.76				72.262	109.86
71.9595	46.88				72.295	116.18
71.9925	47.69				72.328	114.52
72.0255	49.5				72.361	110.8
72.0585	50.54				72.394	97.58
72.0915	49.32				72.427	106.22
72.1245	49.49				72.46	105.74
72.1575	48.33				72.493	103.96
72.1905	47.47				72.526	118.03
72.2235	50.05				72.559	129.23
72.2565	48.53				72.592	132.84
72.2895	49.69				72.625	98.52
72.3225	57.15				72.658	118.33
72.3555	57.74				72.691	112.79
72.3885	52.21				72.724	106.71
72.4215	53.78				72.757	127.75
72.4545	58.66				72.79	115.42
72.4875	55.51				72.823	109.21
72.5205	57.21				72.856	112.06
72.5535	64.62				72.889	112.5
72.5865	60.14				72.922	102.23
72.6195	63.82				72.955	108.56
72.6525	68.43				72.988	87.21
72.6855	60.74				73.021	114.85
72.7185	63.07				73.054	96.34
72.7515	61.63				73.087	114.42
72.7845	62.85				73.12	126.48
72.8175	62.18				73.153	127.94
72.8505	62.88				73.186	106.57
72.8835	60.29				73.219	103.16
72.9165	58.34				73.252	103
72.9495	55.77				73.285	102.11
72.9825	60				73.318	105.52
73.0155	61.8				73.351	106.87
73.0485	67.11				73.384	118.12
73.0815	68.13				73.417	104.82
73.1145	67.77				73.45	100.34
73.1475	66.16				73.483	97.55
73.1805	50				73.516	108.27
73.2135	49.44				73.549	106.25
73.2465	49.41				73.582	105
73.2795	63.95				73.615	99.63
73.3125	62.29				73.648	91.96
73.3455	54.8				73.681	93.71
73.3785	57.65				73.714	97.19
73.4115	61.27				73.747	92.27
73.4445	54.6				73.78	106.19
73.4775	54.55				73.813	105.4
73.5105	52.14				73.846	94.53
73.5435	50.76				73.879	102.32
73.5765	51.44				73.912	99.51
73.6095	66.74				73.945	95.64
73.6425	53.12				73.978	102.28
73.6755	48.86				74.011	100.46
73.7085	60.4				74.044	104.23
73.7415	59.32				74.077	97.79
73.7745	55.66				74.11	85.96
73.8075	51.85				74.143	101.08
73.8405	50.21				74.176	115
73.8735	52.18				74.209	107.98
73.9065	48.3				74.242	104.64
73.9395	54.69				74.275	104.43
73.9725	65.31				74.308	107.02
74.0055	54.87				74.341	102.71
74.0385	57.79				74.374	99.19
74.0715	58.87				74.407	112.03
74.1045	53.88				74.44	103.66
74.1375	51.69				74.473	92.02
74.1705	58.33				74.506	99.3
74.2035	57.17				74.539	96.17
74.2365	48.58				74.572	93.8
74.2695	50.62				74.605	99.37
74.3025	52.25				74.638	112.13
74.3355	48.51				74.671	113.64
74.3685	54.75				74.704	110.55
74.4015	59.15				74.737	104.65
74.4345	53.77				74.77	101.35
74.4675	50.97				74.803	98.13
74.5005	50.44				74.836	101.49
74.5335	49.4				74.869	115.85
74.5665	51.75				74.902	109.37
74.5995	46.1				74.935	107.51
74.6325	44.8				74.968	92.5
74.6655	49.98				75.001	98.96
74.6985	56.06				75.034	112.09
74.7315	54.96				75.067	104.11
74.7645	52.95				75.1	110.02
74.7975	52.98				75.133	103.3
74.8305	51.45				75.166	108.65
74.8635	52.99				75.199	108.12
74.8965	54.27				75.232	112.67
74.9295	56.18				75.265	101.76
74.9625	52.62				75.298	82.84
74.9955	50.54				75.331	95.89
75.0285	55.91				75.364	94.61
75.0615	52.01				75.397	92.78
75.0945	51.88				75.43	110.56
75.1275	54.15				75.463	92.47
75.1605	56.94				75.496	98.83
75.1935	59.85				75.529	75
75.2265	50.42				75.562	75.36
75.2595	50.03				75.595	92.18
75.2925	50.46				75.628	112.92
75.3255	54.33				75.661	107.1
75.3585	50.61				75.694	69.14
75.3915	48.85				75.727	88.12
75.4245	49.45				75.76	76.71
75.4575	51.26				75.793	95.59
75.4905	57.05				75.826	82.28
75.5235	60.83				75.859	90.98
75.5565	59.34				75.892	74.1
75.5895	59.02				75.925	87.88
75.6225	59.57				75.958	92.61
75.6555	57.14				75.991	90.43
75.6885	50.23				76.024	92.53
75.7215	43.83				76.057	87.18
75.7545	41.59				76.09	81.9
75.7875	48.01				76.123	80.19
75.8205	52.59				76.156	92.7
75.8535	50.75				76.189	88.97
75.8865	49.75				76.222	88.54
75.9195	40.75				76.255	87.49
[truncated: 4,613 more rows]

## Sheet: Supplementary Fig. 1b
moox-0		moox-2		moox-5		moox-10		moox-15
10.354	496.93	10.0185	167.88	10.264	460	5.01651	1046	5.01651	1218
10.387	470.27	10.0515	168.69	10.297	472	5.04951	1095.37	5.04951	1195.29
10.42	468.05	10.0845	167.79	10.33	430	5.08251	1093.08	5.08251	1201.82
10.453	502.73	10.1175	166.31	10.363	468	5.11551	1056.44	5.11551	1206.81
10.486	470.68	10.1505	170.12	10.396	455	5.14851	1060.7	5.14851	1218.39
10.519	460.55	10.1835	166.13	10.429	484	5.18151	1041.33	5.18151	1186.21
10.552	488.73	10.2165	166.65	10.462	448	5.21451	1143.5	5.21451	1229.28
10.585	473.63	10.2495	168.95	10.495	440	5.24751	1069.96	5.24751	1173.75
10.618	463.89	10.2825	161	10.528	441	5.28051	1037.73	5.28051	1121.26
10.651	478.11	10.3155	163.81	10.561	422	5.31351	1074.88	5.31351	1166.51
10.684	499.27	10.3485	164.81	10.594	499	5.34651	1061.65	5.34651	1091.76
10.717	468.33	10.3815	173.89	10.627	460	5.37951	991.847	5.37951	1112.72
10.75	441.73	10.4145	158.19	10.66	404	5.41251	1029.35	5.41251	1162.96
10.783	444.71	10.4475	168.77	10.693	439	5.44551	1037.16	5.44551	1163.48
10.816	466.64	10.4805	172.5	10.726	436	5.47851	1009.02	5.47851	1110.15
10.849	467.75	10.5135	163.15	10.759	426	5.51151	948.706	5.51151	1113.59
10.882	503.01	10.5465	165.5	10.792	433	5.54451	951.954	5.54451	1152.1
10.915	464.74	10.5795	164.79	10.825	430	5.57751	987.403	5.57751	1139.02
10.948	421.78	10.6125	163.1	10.858	439	5.61051	976.689	5.61051	1107.51
10.981	432.82	10.6455	173.77	10.891	399	5.64351	982.397	5.64351	1055.93
11.014	474.23	10.6785	161.78	10.924	408	5.67651	985.253	5.67651	1093.55
11.047	474.21	10.7115	162.37	10.957	439	5.70951	923.301	5.70951	1133.04
11.08	501.87	10.7445	157.45	10.99	450	5.74251	988.346	5.74251	1130.89
11.113	457.06	10.7775	163	11.023	439	5.77551	929.091	5.77551	1077.35
11.146	454.97	10.8105	168.28	11.056	408	5.80851	925.829	5.80851	1031.23
11.179	447.53	10.8435	154.37	11.089	405	5.84151	947.839	5.84151	1040.52
11.212	431.91	10.8765	155.44	11.122	411	5.87451	932.204	5.87451	1071.48
11.245	456.43	10.9095	164.77	11.155	404	5.90751	917.731	5.90751	1053.68
11.278	447	10.9425	161.08	11.188	430	5.94051	887.867	5.94051	1015.74
11.311	460.71	10.9755	152.21	11.221	418	5.97351	920.503	5.97351	1020.73
11.344	474.13	11.0085	160.57	11.254	403	6.00651	903.928	6.00651	1027.9
11.377	474.22	11.0415	167.25	11.287	423	6.03951	870.919	6.03951	1010.8
11.41	448.69	11.0745	166.35	11.32	425	6.07251	902.727	6.07251	1037.92
11.443	443.88	11.1075	160.16	11.353	421	6.10551	911.847	6.10551	1023.95
11.476	450.14	11.1405	160.86	11.386	400	6.13851	885.035	6.13851	998.851
11.509	436.24	11.1735	146.36	11.419	423	6.17151	867.982	6.17151	1008.25
11.542	431.38	11.2065	159.29	11.452	401	6.20451	869.994	6.20451	1011.28
11.575	420.56	11.2395	159.23	11.485	395	6.23751	878.726	6.23751	996.226
11.608	436.72	11.2725	153.83	11.518	419	6.27051	896.029	6.27051	977.726
11.641	438.04	11.3055	162.65	11.551	398	6.30351	892.778	6.30351	957.819
11.674	404.56	11.3385	158.13	11.584	380	6.33651	862.171	6.33651	934.62
11.707	423.57	11.3715	167.91	11.617	404	6.36951	854.707	6.36951	956.753
11.74	447.87	11.4045	158.95	11.65	415	6.40251	877.071	6.40251	984.027
11.773	425.4	11.4375	162.17	11.683	397	6.43551	874.745	6.43551	966.785
11.806	421.73	11.4705	165.43	11.716	394	6.46851	864.537	6.46851	941.913
11.839	439.13	11.5035	167.77	11.749	408	6.50151	869.516	6.50151	923.431
11.872	436.32	11.5365	174.13	11.782	414	6.53451	845.702	6.53451	910.609
11.905	434.41	11.5695	171.66	11.815	391	6.56751	796.723	6.56751	911.885
11.938	437.37	11.6025	173.66	11.848	377	6.60051	784.565	6.60051	966.556
11.971	456.32	11.6355	171.01	11.881	375	6.63351	834.912	6.63351	950.824
12.004	468.41	11.6685	175.04	11.914	383	6.66651	825	6.66651	867.622
12.037	455.23	11.7015	162.29	11.947	384	6.69951	814.343	6.69951	891.789
12.07	457.23	11.7345	161.31	11.98	362	6.73251	815.556	6.73251	910.546
12.103	444.97	11.7675	170.87	12.013	393	6.76551	842.132	6.76551	901.34
12.136	456.53	11.8005	174.75	12.046	438	6.79851	822.029	6.79851	894.288
12.169	439.52	11.8335	177.45	12.079	408	6.83151	821.899	6.83151	897.538
12.202	464.83	11.8665	178.85	12.112	384	6.86451	788.204	6.86451	902.921
12.235	479.07	11.8995	183.13	12.145	377	6.89751	786.264	6.89751	838.661
12.268	486.61	11.9325	185.85	12.178	391	6.93051	798.598	6.93051	860.733
12.301	478.42	11.9655	188.52	12.211	405	6.96351	786.336	6.96351	842.975
12.334	504.08	11.9985	189.4	12.244	397	6.99651	796.688	6.99651	802.176
12.367	530.16	12.0315	204.96	12.277	433	7.02951	793.958	7.02951	827.568
12.4	558.65	12.0645	207.14	12.31	441	7.06251	828.462	7.06251	828.538
12.433	606.47	12.0975	213.27	12.343	437	7.09551	789.513	7.09551	872.575
12.466	595	12.1305	233.61	12.376	436	7.12851	811.564	7.12851	850.965
12.499	639.7	12.1635	243.31	12.409	458	7.16151	788.979	7.16151	789.239
12.532	737.41	12.1965	258.08	12.442	467	7.19451	744.713	7.19451	824.459
12.565	795.95	12.2295	271.05	12.475	529	7.22751	719.931	7.22751	852.717
12.598	899.43	12.2625	291.31	12.508	515	7.26051	778.703	7.26051	827.597
12.631	989.09	12.2955	331.26	12.541	557	7.29351	741.405	7.29351	820.532
12.664	1145.28	12.3285	366.74	12.574	603	7.32651	792.345	7.32651	824.788
12.697	1275.95	12.3615	400.24	12.607	679	7.35951	786.706	7.35951	777.41
12.73	1441.99	12.3945	446.37	12.64	711	7.39251	715.436	7.39251	784.411
12.763	1751.01	12.4275	502.48	12.673	739	7.42551	731.619	7.42551	818.46
12.796	1913.2	12.4605	569.11	12.706	740	7.45851	750.291	7.45851	808.905
12.829	1918.23	12.4935	664.67	12.739	859	7.49151	740	7.49151	767.576
12.862	1955.5	12.5265	755.96	12.772	810	7.52451	739.765	7.52451	828.768
12.895	1912.11	12.5595	835.13	12.805	796	7.55751	734.61	7.55751	725
12.928	1609.68	12.5925	970.9	12.838	804	7.59051	756.875	7.59051	725.584
12.961	1289.85	12.6255	1162.32	12.871	649	7.62351	748.036	7.62351	766.96
12.994	988.71	12.6585	1315.61	12.904	615	7.65651	776.67	7.65651	735.364
13.027	811.83	12.6915	1383.87	12.937	542	7.68951	705.754	7.68951	777.943
13.06	697.89	12.7245	1453.46	12.97	484	7.72251	756.02	7.72251	709.64
13.093	609.16	12.7575	1397.68	13.003	398	7.75551	721.874	7.75551	724.112
13.126	519.41	12.7905	1253.4	13.036	435	7.78851	665.593	7.78851	799.106
13.159	497.3	12.8235	1111.39	13.069	374	7.82151	705.494	7.82151	766.984
13.192	474.03	12.8565	946.94	13.102	378	7.85451	705.349	7.85451	758.523
13.225	390.76	12.8895	768.31	13.135	333	7.88751	676.196	7.88751	753.499
13.258	398.91	12.9225	612.61	13.168	378	7.92051	700.512	7.92051	719.276
13.291	421.18	12.9555	477.81	13.201	355	7.95351	710.124	7.95351	708.876
13.324	462.91	12.9885	401.24	13.234	354	7.98651	682.548	7.98651	704.551
13.357	407.65	13.0215	327.27	13.267	333	8.01951	683.947	8.01951	749.876
13.39	385.25	13.0545	270.6	13.3	343	8.05251	708.433	8.05251	737.914
13.423	361.5	13.0875	228.94	13.333	321	8.08551	693.218	8.08551	683.72
13.456	389.57	13.1205	212.47	13.366	315	8.11851	715.784	8.11851	715.204
13.489	352.12	13.1535	189.73	13.399	335	8.15151	686.845	8.15151	726.598
13.522	370.98	13.1865	175.26	13.432	350	8.18451	666.205	8.18451	730.145
13.555	356.49	13.2195	168.21	13.465	344	8.21751	667.642	8.21751	710.884
13.588	342.36	13.2525	157.02	13.498	312	8.25051	639.319	8.25051	705.761
13.621	354.27	13.2855	144.44	13.531	336	8.28351	633.742	8.28351	697.019
13.654	341.28	13.3185	131.46	13.564	283	8.31651	615.87	8.31651	688.85
13.687	353.87	13.3515	134.36	13.597	294	8.34951	635.033	8.34951	690.616
13.72	353.87	13.3845	133.9	13.63	299	8.38251	652.815	8.38251	679.211
13.753	350.3	13.4175	137.81	13.663	277	8.41551	642.043	8.41551	646.086
13.786	349.31	13.4505	123.99	13.696	296	8.44851	661.352	8.44851	636.056
13.819	351.7	13.4835	128.78	13.729	313	8.48151	664.257	8.48151	661.212
13.852	374.86	13.5165	124.63	13.762	324	8.51451	667.919	8.51451	706.656
13.885	373.65	13.5495	109.85	13.795	313	8.54751	646.756	8.54751	670.276
13.918	350.43	13.5825	117.34	13.828	314	8.58051	666.001	8.58051	632.115
13.951	327.89	13.6155	124.95	13.861	318	8.61351	654.523	8.61351	626.378
13.984	349.98	13.6485	111.78	13.894	318	8.64651	617.11	8.64651	642.452
14.017	369	13.6815	109.65	13.927	306	8.67951	637.819	8.67951	639.276
14.05	342.6	13.7145	114.68	13.96	299	8.71251	654.159	8.71251	666.212
14.083	337.2	13.7475	111.04	13.993	303	8.74551	630	8.74551	660.001
14.116	361.59	13.7805	117.15	14.026	303	8.77851	646.292	8.77851	617.002
14.149	364.22	13.8135	124.1	14.059	307	8.81151	626.763	8.81151	611.83
14.182	372.54	13.8465	117.68	14.092	297	8.84451	616.141	8.84451	619.467
14.215	385.48	13.8795	109.98	14.125	291	8.87751	634.833	8.87751	632.542
14.248	407.47	13.9125	101.2	14.158	293	8.91051	626.934	8.91051	629.754
14.281	437.97	13.9455	117.43	14.191	287	8.94351	602.186	8.94351	620.451
14.314	447.97	13.9785	106.55	14.224	283	8.97651	597.902	8.97651	625.517
14.347	447.58	14.0115	109.43	14.257	286	9.00951	608.476	9.00951	629.233
14.38	417.47	14.0445	105.14	14.29	280	9.04251	592.22	9.04251	639.034
14.413	372.81	14.0775	106.87	14.323	286	9.07551	595.46	9.07551	638.77
14.446	354.22	14.1105	101.64	14.356	301	9.10851	601.488	9.10851	619.759
14.479	337.87	14.1435	98.7	14.389	293	9.14151	577.248	9.14151	613.814
14.512	330.14	14.1765	98.09	14.422	290	9.17451	577.69	9.17451	612.16
14.545	354.88	14.2095	104.11	14.455	288	9.20751	610.677	9.20751	586.478
14.578	364.4	14.2425	104.9	14.488	296	9.24051	613.31	9.24051	587.163
14.611	334.31	14.2755	104.05	14.521	302	9.27351	600.799	9.27351	581.697
14.644	319.77	14.3085	109.26	14.554	290	9.30651	620.052	9.30651	563.043
14.677	306.03	14.3415	103.6	14.587	296	9.33951	626.59	9.33951	589.937
14.71	285.66	14.3745	104.4	14.62	291	9.37251	595.701	9.37251	600.573
14.743	279.82	14.4075	105.84	14.653	269	9.40551	587.549	9.40551	617.257
14.776	291.85	14.4405	106.47	14.686	280	9.43851	593.306	9.43851	587.553
14.809	308.72	14.4735	99.65	14.719	261	9.47151	577.283	9.47151	579.36
14.842	335.32	14.5065	100.14	14.752	283	9.50451	542.052	9.50451	583.665
14.875	327.08	14.5395	100.52	14.785	300	9.53751	558.484	9.53751	617.7
14.908	322.26	14.5725	96.64	14.818	299	9.57051	568.255	9.57051	613.528
14.941	297.79	14.6055	96.41	14.851	266	9.60351	580.408	9.60351	553.097
14.974	293.79	14.6385	97.89	14.884	262	9.63651	610.708	9.63651	568.54
15.007	305.42	14.6715	100.47	14.917	300	9.66951	592.783	9.66951	565.261
15.04	309.65	14.7045	105.02	14.95	272	9.70251	595.277	9.70251	568.011
15.073	299.03	14.7375	100.66	14.983	272	9.73551	598.008	9.73551	602.424
15.106	321.82	14.7705	93.42	15.016	283	9.76851	550.974	9.76851	594.435
15.139	314.03	14.8035	99.57	15.049	294	9.80151	534.007	9.80151	568.166
15.172	319.14	14.8365	105.05	15.082	282	9.83451	558.756	9.83451	568.935
15.205	294.73	14.8695	101.92	15.115	291	9.86751	538.353	9.86751	589.063
15.238	302.11	14.9025	98.67	15.148	238	9.90051	583.327	9.90051	552.415
15.271	287.75	14.9355	94.56	15.181	262	9.93351	542.093	9.93351	585.162
15.304	319.39	14.9685	93.88	15.214	281	9.96651	516.89	9.96651	552.683
15.337	291.24	15.0015	93.14	15.247	289	9.99951	497.554	9.99951	526.912
15.37	310.57	15.0345	96.09	15.28	265	10.0325	571.824	10.0325	553.727
15.403	283.07	15.0675	100.27	15.313	269	10.0655	554.319	10.0655	526.803
15.436	281.5	15.1005	92.62	15.346	256	10.0985	502.902	10.0985	525.433
15.469	240.5	15.1335	94.03	15.379	279	10.1315	519.566	10.1315	550.798
15.502	275.21	15.1665	92.68	15.412	243	10.1645	532.639	10.1645	545.166
15.535	313.79	15.1995	93.68	15.445	249	10.1975	519.955	10.1975	516.985
15.568	302.13	15.2325	95.44	15.478	251	10.2305	517.008	10.2305	580.859
15.601	326.81	15.2655	95.56	15.511	261	10.2635	519.97	10.2635	525.567
15.634	311.32	15.2985	91.51	15.544	236	10.2965	525.863	10.2965	527.932
15.667	259.74	15.3315	97.43	15.577	253	10.3295	514.425	10.3295	507.744
15.7	285.68	15.3645	87.91	15.61	258	10.3625	501.625	10.3625	547.934
15.733	239.91	15.3975	84.66	15.643	263	10.3955	489.728	10.3955	472.038
15.766	261.16	15.4305	91.51	15.676	243	10.4285	494.56	10.4285	518.893
15.799	288.66	15.4635	90.9	15.709	239	10.4615	533.389	10.4615	527.57
15.832	310.89	15.4965	92.9	15.742	256	10.4945	547.817	10.4945	526.197
15.865	275.57	15.5295	91.03	15.775	248	10.5275	472.569	10.5275	497.56
15.898	263.97	15.5625	95.8	15.808	266	10.5605	517.318	10.5605	503.637
15.931	263	15.5955	97.96	15.841	248	10.5935	499.96	10.5935	476.506
15.964	273.24	15.6285	90.7	15.874	250	10.6265	477.282	10.6265	511.988
15.997	260.71	15.6615	85.24	15.907	231	10.6595	494.116	10.6595	510.618
16.03	295.26	15.6945	87.57	15.94	236	10.6925	483.966	10.6925	463.596
16.063	289.14	15.7275	88.59	15.973	254	10.7255	472.871	10.7255	494.644
16.096	270.75	15.7605	102.65	16.006	237	10.7585	523.816	10.7585	512.002
16.129	281.22	15.7935	96.81	16.039	244	10.7915	494.47	10.7915	482.496
16.162	274.89	15.8265	83.85	16.072	247	10.8245	486.1	10.8245	484.074
16.195	281.18	15.8595	90.99	16.105	250	10.8575	473.278	10.8575	533.501
16.228	250.9	15.8925	87.99	16.138	244	10.8905	479.495	10.8905	493.274
16.261	248.13	15.9255	93.13	16.171	237	10.9235	463.837	10.9235	511.114
16.294	250.27	15.9585	89.42	16.204	237	10.9565	467.141	10.9565	494.3
16.327	265	15.9915	97.66	16.237	238	10.9895	464.594	10.9895	503.641
16.36	264.69	16.0245	90.12	16.27	237	11.0225	471.088	11.0225	495.921
16.393	267.51	16.0575	84.79	16.303	225	11.0555	485.983	11.0555	492.432
16.426	256.47	16.0905	89.64	16.336	228	11.0885	468.09	11.0885	479.176
16.459	261.95	16.1235	95.16	16.369	242	11.1215	486.092	11.1215	486.546
16.492	261.49	16.1565	88.33	16.402	235	11.1545	476.356	11.1545	475.193
16.525	275.88	16.1895	83.12	16.435	231	11.1875	455.369	11.1875	460.549
16.558	272.23	16.2225	93.32	16.468	235	11.2205	457.232	11.2205	458.623
16.591	273.2	16.2555	82.91	16.501	221	11.2535	466.495	11.2535	467.548
16.624	275.4	16.2885	87.13	16.534	216	11.2865	465.216	11.2865	490.341
16.657	272.41	16.3215	90.07	16.567	237	11.3195	473.121	11.3195	480.343
16.69	259.92	16.3545	90.3	16.6	222	11.3525	478.137	11.3525	443.238
16.723	253.81	16.3875	82.18	16.633	220	11.3855	447.998	11.3855	462.282
16.756	265.35	16.4205	82.43	16.666	246	11.4185	428.737	11.4185	479.6
16.789	257.96	16.4535	80.78	16.699	247	11.4515	437.952	11.4515	472.07
16.822	250.77	16.4865	89.17	16.732	255	11.4845	448.699	11.4845	478.743
16.855	243.2	16.5195	85.64	16.765	247	11.5175	449.943	11.5175	464.131
16.888	239.49	16.5525	76.57	16.798	223	11.5505	464.886	11.5505	446.49
16.921	253.84	16.5855	76.04	16.831	209	11.5835	454.918	11.5835	463.01
16.954	251.47	16.6185	82.21	16.864	217	11.6165	435.374	11.6165	461.553
16.987	252.61	16.6515	80.6	16.897	229	11.6495	435.528	11.6495	459.438
17.02	264.55	16.6845	83.34	16.93	221	11.6825	419.322	11.6825	479.554
17.053	254.41	16.7175	76.57	16.963	224	11.7155	444.185	11.7155	481.602
17.086	253.86	16.7505	82.11	16.996	220	11.7485	464.161	11.7485	488.368
17.119	251.92	16.7835	86.26	17.029	220	11.7815	441.408	11.7815	458.701
17.152	245.91	16.8165	87.82	17.062	219	11.8145	445.561	11.8145	410.978
17.185	266.75	16.8495	80.19	17.095	204	11.8475	439.126	11.8475	419.363
17.218	249.39	16.8825	82.41	17.128	209	11.8805	414.814	11.8805	435.408
17.251	246.8	16.9155	83.98	17.161	221	11.9135	418.164	11.9135	450.862
17.284	241.66	16.9485	83.18	17.194	224	11.9465	428.611	11.9465	472.566
17.317	232.7	16.9815	82.25	17.227	209	11.9795	404.673	11.9795	489.039
17.35	251.8	17.0145	78.25	17.26	206	12.0125	407.996	12.0125	454.522
17.383	255.33	17.0475	79.21	17.293	214	12.0455	424.386	12.0455	436.706
17.416	236.89	17.0805	83.92	17.326	222	12.0785	430.953	12.0785	428.309
17.449	239	17.1135	84.89	17.359	209	12.1115	434.777	12.1115	455.537
17.482	240.63	17.1465	80.77	17.392	213	12.1445	413.233	12.1445	451.499
17.515	239.82	17.1795	81.49	17.425	199	12.1775	458.46	12.1775	434.805
17.548	234.37	17.2125	80.22	17.458	201	12.2105	442.289	12.2105	451.434
17.581	253.88	17.2455	78.88	17.491	187	12.2435	410.627	12.2435	403.246
17.614	226.43	17.2785	76.91	17.524	208	12.2765	429.499	12.2765	423.125
17.647	228.95	17.3115	72.1	17.557	224	12.3095	443.442	12.3095	421.03
17.68	210.51	17.3445	76.81	17.59	235	12.3425	431.98	12.3425	418.618
17.713	229	17.3775	86.36	17.623	212	12.3755	364.435	12.3755	397.965
17.746	231.22	17.4105	85.39	17.656	190	12.4085	391.096	12.4085	431.725
17.779	243.11	17.4435	78.98	17.689	195	12.4415	442.424	12.4415	458.625
17.812	246.82	17.4765	80.98	17.722	211	12.4745	424.428	12.4745	424.286
17.845	236.26	17.5095	88.83	17.755	199	12.5075	423.105	12.5075	424.568
17.878	250.52	17.5425	86.41	17.788	195	12.5405	364.876	12.5405	410.18
17.911	244.74	17.5755	82.16	17.821	192	12.5735	424	12.5735	377.462
17.944	226.19	17.6085	81.64	17.854	213	12.6065	423.262	12.6065	406.908
17.977	228.33	17.6415	76.18	17.887	216	12.6395	415.602	12.6395	407.911
18.01	231.1	17.6745	77.84	17.92	213	12.6725	410.598	12.6725	427.856
18.043	219.74	17.7075	77.88	17.953	223	12.7055	404.837	12.7055	401.532
18.076	232.75	17.7405	76.74	17.986	213	12.7385	402.542	12.7385	461.791
18.109	247.48	17.7735	76.91	18.019	204	12.7715	414.68	12.7715	433.07
18.142	201.53	17.8065	73.56	18.052	204	12.8045	404.361	12.8045	402.706
18.175	229.14	17.8395	72.11	18.085	190	12.8375	425.823	12.8375	444.672
18.208	251.85	17.8725	75.67	18.118	232	12.8705	379.417	12.8705	358.772
18.241	247.09	17.9055	78.1	18.151	218	12.9035	397.591	12.9035	412.795
18.274	220.85	17.9385	76.44	18.184	190	12.9365	381.581	12.9365	402.41
18.307	198.02	17.9715	76.05	18.217	211	12.9695	421.035	12.9695	434.409
18.34	216.8	18.0045	73.62	18.25	212	13.0025	404.189	13.0025	437.881
18.373	219.86	18.0375	69.6	18.283	187	13.0355	377.018	13.0355	402.739
18.406	226.42	18.0705	81.26	18.316	185	13.0685	391.475	13.0685	400
18.439	224.28	18.1035	86.25	18.349	184	13.1015	370.434	13.1015	402.708
18.472	238.28	18.1365	74.12	18.382	197	13.1345	368.89	13.1345	376.3
18.505	220.64	18.1695	71.65	18.415	194	13.1675	383.038	13.1675	396.688
18.538	237.08	18.2025	66.04	18.448	176	13.2005	389.324	13.2005	398.271
18.571	231.45	18.2355	75.84	18.481	180	13.2335	376.367	13.2335	382.663
18.604	223.26	18.2685	70.88	18.514	196	13.2665	363.087	13.2665	426.168
18.637	225.32	18.3015	73.59	18.547	204	13.2995	370.095	13.2995	381.259
18.67	212.12	18.3345	82.02	18.58	192	13.3325	336.992	13.3325	387.097
18.703	239.55	18.3675	74.46	18.613	178	13.3655	379.494	13.3655	403.824
18.736	227.22	18.4005	74.06	18.646	229	13.3985	382.534	13.3985	373.868
18.769	231.34	18.4335	75.14	18.679	202	13.4315	341.966	13.4315	377.419
18.802	226.34	18.4665	72.01	18.712	193	13.4645	348.562	13.4645	400.853
18.835	228.52	18.4995	77.5	18.745	203	13.4975	351.747	13.4975	393.483
18.868	205.55	18.5325	75.47	18.778	192	13.5305	377.578	13.5305	397.121
18.901	235.59	18.5655	78.64	18.811	179	13.5635	357.974	13.5635	387.664
18.934	222.81	18.5985	82.52	18.844	169	13.5965	373.381	13.5965	388.704
18.967	207.78	18.6315	80.85	18.877	196	13.6295	365.09	13.6295	376.993
19	222.57	18.6645	80.84	18.91	203	13.6625	349.435	13.6625	384.067
19.033	223.22	18.6975	80.07	18.943	203	13.6955	367.602	13.6955	397.426
19.066	217.34	18.7305	70.05	18.976	188	13.7285	350.84	13.7285	375.828
19.099	224.48	18.7635	77.91	19.009	175	13.7615	349.346	13.7615	380.544
19.132	220.04	18.7965	68.89	19.042	200	13.7945	357.911	13.7945	375.983
19.165	205.59	18.8295	77.64	19.075	191	13.8275	353.379	13.8275	395.478
19.198	209.83	18.8625	71.11	19.108	189	13.8605	344.493	13.8605	402.21
19.231	215.4	18.8955	78.53	19.141	179	13.8935	344.595	13.8935	381.02
19.264	221.48	18.9285	70.74	19.174	177	13.9265	341.721	13.9265	366.894
19.297	226.58	18.9615	67.46	19.207	191	13.9595	333.409	13.9595	381.218
19.33	227.56	18.9945	70.64	19.24	203	13.9925	338.419	13.9925	403.542
19.363	216.43	19.0275	74.44	19.273	202	14.0255	343.903	14.0255	414.841
19.396	205.92	19.0605	65.78	19.306	191	14.0585	348.896	14.0585	432.472
19.429	212.36	19.0935	67.99	19.339	190	14.0915	351.907	14.0915	459.654
19.462	213.87	19.1265	77.16	19.372	184	14.1245	365.832	14.1245	487.3
19.495	213	19.1595	74.1	19.405	183	14.1575	359.583	14.1575	497.513
19.528	217	19.1925	71.15	19.438	183	14.1905	340.427	14.1905	490.602
19.561	214.15	19.2255	72.39	19.471	175	14.2235	348.201	14.2235	468.561
19.594	223.95	19.2585	71.69	19.504	172	14.2565	350.319	14.2565	454.442
19.627	232.7	19.2915	82.87	19.537	175	14.2895	346.895	14.2895	434.254
19.66	209.25	19.3245	71.87	19.57	186	14.3225	339.303	14.3225	393.477
19.693	194.95	19.3575	65.7	19.603	180	14.3555	330.956	14.3555	375.289
19.726	207.12	19.3905	66.66	19.636	162	14.3885	341.553	14.3885	377.974
19.759	210.2	19.4235	73.58	19.669	166	14.4215	349.015	14.4215	375.993
19.792	211.42	19.4565	76.2	19.702	172	14.4545	340.235	14.4545	339.153
19.825	215.51	19.4895	75.56	19.735	170	14.4875	336.203	14.4875	344.717
19.858	210.17	19.5225	70.17	19.768	174	14.5205	354.693	14.5205	349.564
19.891	212.95	19.5555	73.6	19.801	185	14.5535	361.262	14.5535	342.151
19.924	205.28	19.5885	70	19.834	196	14.5865	337.663	14.5865	344.681
19.957	205.33	19.6215	67.31	19.867	184	14.6195	329.073	14.6195	365.431
19.99	228.69	19.6545	71.81	19.9	183	14.6525	324.075	14.6525	364.01
20.023	222.03	19.6875	66.28	19.933	167	14.6855	324.662	14.6855	371.817
20.056	199.43	19.7205	65.91	19.966	176	14.7185	326.469	14.7185	359.939
20.089	179.64	19.7535	74.3	19.999	195	14.7515	316.894	14.7515	333.213
20.122	191.29	19.7865	73.5	20.032	211	14.7845	314.522	14.7845	316.553
20.155	220.92	19.8195	73.99	20.065	168	14.8175	300.112	14.8175	304.867
20.188	238.36	19.8525	69.53	20.098	153	14.8505	318.279	14.8505	330.652
20.221	203.89	19.8855	68.3	20.131	165	14.8835	311.279	14.8835	341.821
20.254	191.53	19.9185	74.58	20.164	160	14.9165	330.207	14.9165	327.415
20.287	189.94	19.9515	74.6	20.197	168	14.9495	329.637	14.9495	331.141
20.32	206.18	19.9845	73.17	20.23	176	14.9825	323.818	14.9825	337.088
20.353	203.91	20.0175	74.38	20.263	162	15.0155	326.218	15.0155	327.049
20.386	195.69	20.0505	68.22	20.296	181	15.0485	339.179	15.0485	340.276
20.419	224.11	20.0835	64.75	20.329	177	15.0815	321.262	15.0815	331.288
20.452	187.62	20.1165	67.63	20.362	164	15.1145	307.498	15.1145	336.812
20.485	208.45	20.1495	69.82	20.395	173	15.1475	325.069	15.1475	360.218
20.518	190.22	20.1825	69.55	20.428	185	15.1805	329.072	15.1805	342.859
20.551	195.07	20.2155	61.07	20.461	174	15.2135	300.209	15.2135	309.029
20.584	223.33	20.2485	61.25	20.494	185	15.2465	338.573	15.2465	318.434
20.617	215.72	20.2815	66.22	20.527	161	15.2795	311.409	15.2795	314.525
20.65	210.84	20.3145	63.8	20.56	166	15.3125	317.667	15.3125	347.61
20.683	191.27	20.3475	68.74	20.593	183	15.3455	329.215	15.3455	325.074
20.716	176.56	20.3805	76.91	20.626	160	15.3785	333.818	15.3785	348.515
20.749	193.04	20.4135	72.57	20.659	176	15.4115	327.7	15.4115	333
20.782	195.05	20.4465	72.09	20.692	185	15.4445	311.005	15.4445	332.804
20.815	200.97	20.4795	71.38	20.725	164	15.4775	311.992	15.4775	294.297
20.848	213.77	20.5125	68.87	20.758	180	15.5105	319.838	15.5105	303.797
20.881	218.85	20.5455	61.67	20.791	179	15.5435	292.921	15.5435	318.507
20.914	190.29	20.5785	63.39	20.824	153	15.5765	329.224	15.5765	369.586
20.947	180.5	20.6115	62.41	20.857	177	15.6095	333.825	15.6095	331.502
20.98	190.25	20.6445	72.97	20.89	172	15.6425	345.15	15.6425	332.717
21.013	192.84	20.6775	76.92	20.923	176	15.6755	296.507	15.6755	300.921
21.046	200.25	20.7105	70.05	20.956	180	15.7085	310.982	15.7085	317.886
21.079	193.85	20.7435	63	20.989	166	15.7415	312.109	15.7415	324.456
21.112	204.45	20.7765	64.79	21.022	170	15.7745	296.185	15.7745	334.665
21.145	191.24	20.8095	63.97	21.055	159	15.8075	302.66	15.8075	307.423
21.178	196.7	20.8425	68.88	21.088	166	15.8405	324.48	15.8405	325.186
21.211	213.18	20.8755	61.02	21.121	188	15.8735	323.797	15.8735	307.983
21.244	201.05	20.9085	61.43	21.154	195	15.9065	309.751	15.9065	340.434
21.277	189	20.9415	61.74	21.187	165	15.9395	325.754	15.9395	337.4
21.31	197.47	20.9745	67.42	21.22	157	15.9725	314.748	15.9725	308.509
21.343	206.34	21.0075	60.41	21.253	192	16.0055	299.938	16.0055	312.271
21.376	200.2	21.0405	64.78	21.286	170	16.0385	306.33	16.0385	320.442
21.409	169.61	21.0735	67.83	21.319	151	16.0715	294.468	16.0715	319.706
21.442	182.89	21.1065	67.64	21.352	174	16.1045	292.257	16.1045	301.7
21.475	174.42	21.1395	71.9	21.385	193	16.1375	321.103	16.1375	296
21.508	193.07	21.1725	65.08	21.418	186	16.1705	317.916	16.1705	325.803
21.541	203.43	21.2055	69.88	21.451	168	16.2035	312.286	16.2035	314.858
21.574	181.47	21.2385	60.51	21.484	176	16.2365	316.911	16.2365	308.105
21.607	201.04	21.2715	69.22	21.517	185	16.2695	294.886	16.2695	280.063
21.64	197.71	21.3045	65.42	21.55	177	16.3025	289.411	16.3025	273.087
21.673	202.66	21.3375	62.31	21.583	161	16.3355	325.848	16.3355	296.574
21.706	195.93	21.3705	64.37	21.616	165	16.3685	329.328	16.3685	324.578
21.739	186.44	21.4035	67.12	21.649	173	16.4015	313.062	16.4015	324.424
21.772	187.51	21.4365	68.88	21.682	188	16.4345	294.859	16.4345	310.239
21.805	166.84	21.4695	67.96	21.715	173	16.4675	312.751	16.4675	300.095
21.838	184.36	21.5025	71.49	21.748	159	16.5005	336.206	16.5005	315.014
21.871	202.64	21.5355	70.14	21.781	157	16.5335	328.068	16.5335	298.784
21.904	203.89	21.5685	70.95	21.814	170	16.5665	323.602	16.5665	297.981
21.937	187.92	21.6015	67.6	21.847	167	16.5995	346.127	16.5995	290.061
21.97	183.94	21.6345	66.58	21.88	173	16.6325	340.653	16.6325	290.597
22.003	188.76	21.6675	68.63	21.913	191	16.6655	324	16.6655	281.898
22.036	196.54	21.7005	68.35	21.946	201	16.6985	308.261	16.6985	282.985
22.069	183.36	21.7335	67.36	21.979	185	16.7315	310.383	16.7315	309.168
22.102	186.59	21.7665	71.57	22.012	183	16.7645	313.517	16.7645	314.003
22.135	184.58	21.7995	64.42	22.045	188	16.7975	313.167	16.7975	298.372
22.168	174.16	21.8325	70.55	22.078	189	16.8305	325.526	16.8305	284
22.201	195.32	21.8655	72.73	22.111	192	16.8635	332.844	16.8635	292.305
22.234	195.29	21.8985	65.14	22.144	182	16.8965	318.664	16.8965	292.127
22.267	193.75	21.9315	70.8	22.177	186	16.9295	295.67	16.9295	290.467
22.3	199.41	21.9645	65.48	22.21	185	16.9625	302.153	16.9625	295.954
22.333	206.89	21.9975	64.04	22.243	180	16.9955	306.752	16.9955	285
22.366	208.19	22.0305	63.38	22.276	201	17.0285	305.841	17.0285	293.362
22.399	200.51	22.0635	68.03	22.309	213	17.0615	285.831	17.0615	302.144
22.432	199.51	22.0965	61.11	22.342	199	17.0945	287.933	17.0945	303.831
22.465	216.8	22.1295	67.83	22.375	185	17.1275	293.949	17.1275	320.242
22.498	222.8	22.1625	70.07	22.408	196	17.1605	283.601	17.1605	311.399
22.531	204.03	22.1955	74.79	22.441	199	17.1935	321.72	17.1935	295.39
22.564	208.32	22.2285	76.32	22.474	193	17.2265	320.758	17.2265	309.941
22.597	208.06	22.2615	80.54	22.507	195	17.2595	282.052	17.2595	286.496
22.63	204.8	22.2945	76.91	22.54	198	17.2925	301.188	17.2925	280.318
22.663	211.47	22.3275	75.96	22.573	200	17.3255	313.101	17.3255	296.303
22.696	230.34	22.3605	77.7	22.606	187	17.3585	335.456	17.3585	294.338
22.729	215.38	22.3935	88.88	22.639	216	17.3915	323.635	17.3915	314.777
22.762	216.72	22.4265	96.19	22.672	197	17.4245	304.846	17.4245	318.972
22.795	244.65	22.4595	95.5	22.705	215	17.4575	330.984	17.4575	318.452
22.828	250.89	22.4925	92.68	22.738	212	17.4905	298.488	17.4905	293.903
22.861	251.04	22.5255	89.32	22.771	211	17.5235	273.134	17.5235	284.46
22.894	248.33	22.5585	93.56	22.804	219	17.5565	304.784	17.5565	289.02
22.927	287.95	22.5915	103.95	22.837	217	17.5895	304.701	17.5895	288.666
22.96	323.7	22.6245	107.79	22.87	229	17.6225	296.143	17.6225	303.635
22.993	369.52	22.6575	107.09	22.903	243	17.6555	320.628	17.6555	293.05
23.026	369.81	22.6905	106.8	22.936	251	17.6885	293.744	17.6885	276.361
23.059	394.38	22.7235	112.21	22.969	260	17.7215	302.806	17.7215	302.664
23.092	455.97	22.7565	120.18	23.002	270	17.7545	295.6	17.7545	308.321
23.125	525.2	22.7895	116.13	23.035	280	17.7875	301.934	17.7875	315.851
23.158	637.82	22.8225	116.98	23.068	324	17.8205	316.104	17.8205	297.81
23.191	775.82	22.8555	130.21	23.101	378	17.8535	298.164	17.8535	298.136
23.224	894.6	22.8885	137.7	23.134	409	17.8865	301.529	17.8865	319.428
23.257	1069.23	22.9215	148.58	23.167	451	17.9195	320.579	17.9195	284.033
23.29	1272.63	22.9545	170.75	23.2	494	17.9525	298.194	17.9525	268.221
23.323	1476.4	22.9875	182.6	23.233	559	17.9855	324.347	17.9855	273.758
23.356	1687.05	23.0205	193.15	23.266	591	18.0185	334.754	18.0185	297.208
23.389	1735.84	23.0535	236.26	23.299	716	18.0515	322	18.0515	307.881
23.422	1829.64	23.0865	276.28	23.332	764	18.0845	322	18.0845	289.121
23.455	1828.03	23.1195	328.29	23.365	880	18.1175	318.076	18.1175	304.696
23.488	1726.06	23.1525	422.2	23.398	951	18.1505	282.171	18.1505	280.791
23.521	1567.77	23.1855	524.18	23.431	1010	18.1835	309.672	18.1835	259.93
23.554	1335	23.2185	664.14	23.464	1085	18.2165	319.488	18.2165	285.406
23.587	1194.19	23.2515	790.07	23.497	1209	18.2495	306.043	18.2495	276.765
23.62	1032.23	23.2845	968.42	23.53	1084	18.2825	317.849	18.2825	292.52
23.653	914.62	23.3175	1183.06	23.563	1045	18.3155	311.759	18.3155	282.233
23.686	796.6	23.3505	1374.84	23.596	1036	18.3485	299.397	18.3485	262.257
23.719	714.29	23.3835	1532.56	23.629	1041	18.3815	284.802	18.3815	282.877
23.752	666.73	23.4165	1544.35	23.662	1031	18.4145	307.282	18.4145	263.452
23.785	581.29	23.4495	1481.5	23.695	1015	18.4475	313.564	18.4475	285.637
23.818	541.82	23.4825	1256.6	23.728	968	18.4805	304.739	18.4805	295.052
23.851	500.4	23.5155	1059.53	23.761	932	18.5135	321.245	18.5135	295.171
23.884	461.05	23.5485	865.86	23.794	840	18.5465	326.633	18.5465	286.833
23.917	420.13	23.5815	731.98	23.827	735	18.5795	317.352	18.5795	301.08
23.95	407.24	23.6145	600	23.86	616	18.6125	304.712	18.6125	264.64
23.983	382.56	23.6475	548.8	23.893	549	18.6455	333.149	18.6455	267.238
24.016	342.95	23.6805	503.43	23.926	415	18.6785	321.316	18.6785	272.532
24.049	368.53	23.7135	446.65	23.959	353	18.7115	305.959	18.7115	273
24.082	358.44	23.7465	437.27	23.992	320	18.7445	317.816	18.7445	315.226
24.115	330.54	23.7795	355.98	24.025	316	18.7775	318.631	18.7775	300.874
24.148	322.28	23.8125	304.76	24.058	305	18.8105	314.138	18.8105	289.284
24.181	298.72	23.8455	246.6	24.091	276	18.8435	324.246	18.8435	284.08
24.214	309.09	23.8785	223.05	24.124	275	18.8765	324.168	18.8765	282
24.247	309.84	23.9115	212.16	24.157	263	18.9095	322.678	18.9095	303.683
24.28	296.66	23.9445	183.82	24.19	273	18.9425	324.995	18.9425	310.675
24.313	286.76	23.9775	164.79	24.223	257	18.9755	331.218	18.9755	288.779
24.346	276.29	24.0105	153.61	24.256	258	19.0085	310.332	19.0085	283.757
24.379	270.11	24.0435	152.96	24.289	263	19.0415	315.811	19.0415	276.968
24.412	278.87	24.0765	150.3	24.322	246	19.0745	313.484	19.0745	292.503
24.445	268.08	24.1095	145.25	24.355	249	19.1075	312.823	19.1075	293.965
24.478	252.27	24.1425	139.09	24.388	250	19.1405	326.836	19.1405	286.589
24.511	261.74	24.1755	144.01	24.421	244	19.1735	325.506	19.1735	287
24.544	282.33	24.2085	128.87	24.454	232	19.2065	321.128	19.2065	271.777
24.577	280.48	24.2415	127.67	24.487	227	19.2395	335.779	19.2395	271.574
24.61	281.74	24.2745	128.97	24.52	220	19.2725	331.383	19.2725	281
24.643	296.87	24.3075	130.35	24.553	239	19.3055	313.267	19.3055	283.629
24.676	266.38	24.3405	123.15	24.586	256	19.3385	317.212	19.3385	280.868
24.709	247.6	24.3735	128.51	24.619	257	19.3715	332.008	19.3715	267.49
24.742	266.43	24.4065	135.59	24.652	258	19.4045	315.09	19.4045	280.47
24.775	281.95	24.4395	149.57	24.685	242	19.4375	296.179	19.4375	283.512
24.808	294.53	24.4725	140.63	24.718	213	19.4705	320.581	19.4705	277.731
24.841	282.69	24.5055	132.89	24.751	211	19.5035	326.149	19.5035	290.15
24.874	275.6	24.5385	141.57	24.784	235	19.5365	308.437	19.5365	279.064
24.907	279.73	24.5715	143.49	24.817	242	19.5695	320.893	19.5695	271.452
24.94	283.12	24.6045	147.32	24.85	247	19.6025	337.412	19.6025	268.824
24.973	287.56	24.6375	149.01	24.883	239	19.6355	328.812	19.6355	270.799
25.006	275	24.6705	146.08	24.916	240	19.6685	321.963	19.6685	275.481
25.039	277.26	24.7035	151.33	24.949	265	19.7015	319.156	19.7015	278.755
25.072	293.01	24.7365	148.66	24.982	256	19.7345	311.184	19.7345	278.615
25.105	316.11	24.7695	150.83	25.015	277	19.7675	323.696	19.7675	283.256
25.138	323.39	24.8025	168.4	25.048	277	19.8005	312.131	19.8005	282.017
25.171	336.85	24.8355	161.81	25.081	293	19.8335	334.233	19.8335	284.058
25.204	346.61	24.8685	163.58	25.114	311	19.8665	325.463	19.8665	278.756
25.237	360.47	24.9015	164.28	25.147	316	19.8995	336.63	19.8995	287.336
25.27	404.34	24.9345	172.73	25.18	347	19.9325	325.428	19.9325	304.287
25.303	382.41	24.9675	183.79	25.213	370	19.9655	331.457	19.9655	280.819
25.336	402.41	25.0005	191.12	25.246	388	19.9985	324.46	19.9985	277.532
25.369	439.01	25.0335	194.66	25.279	452	20.0315	304.086	20.0315	269.433
25.402	480.85	25.0665	207.07	25.312	486	20.0645	358.53	20.0645	295.762
25.435	511.82	25.0995	225.23	25.345	469	20.0975	349.881	20.0975	296.432
25.468	603.99	25.1325	236.77	25.378	548	20.1305	329.196	20.1305	272.576
25.501	707.94	25.1655	262.14	25.411	616	20.1635	342.239	20.1635	323.958
25.534	890.52	25.1985	293.89	25.444	585	20.1965	321.958	20.1965	281.03
25.567	1019.31	25.2315	330.09	25.477	647	20.2295	295.924	20.2295	285.359
25.6	1318.21	25.2645	377.78	25.51	661	20.2625	362.363	20.2625	272.555
25.633	1721.67	25.2975	433.34	25.543	714	20.2955	354.162	20.2955	317.282
25.666	1992.9	25.3305	498.6	25.576	782	20.3285	329.081	20.3285	281.455
25.699	2321.21	25.3635	557.8	25.609	868	20.3615	348.879	20.3615	266.092
25.732	2671.14	25.3965	649.67	25.642	881	20.3945	346.044	20.3945	277.043
25.765	2969.77	25.4295	778.74	25.675	945	20.4275	329.424	20.4275	299.503
25.798	2971.74	25.4625	938.93	25.708	940	20.4605	328.587	20.4605	275.833
25.831	2786.29	25.4955	1167.3	25.741	975	20.4935	377.585	20.4935	274.495
25.864	2346.96	25.5285	1407.77	25.774	884	20.5265	358.186	20.5265	282.162
25.897	2127.63	25.5615	1646.54	25.807	774	20.5595	345.318	20.5595	300.227
25.93	1766	25.5945	1851.96	25.84	725	20.5925	351.015	20.5925	283.836
25.963	1295.48	25.6275	2012.95	25.873	550	20.6255	322.646	20.6255	279.525
25.996	1013.67	25.6605	2038.03	25.906	469	20.6585	353.819	20.6585	304.781
26.029	883.34	25.6935	1927.12	25.939	471	20.6915	330.122	20.6915	276.148
26.062	732.33	25.7265	1768.13	25.972	389	20.7245	367.326	20.7245	273.053
26.095	580.29	25.7595	1511.36	26.005	355	20.7575	380.605	20.7575	314.694
26.128	528.03	25.7925	1235.8	26.038	325	20.7905	373.344	20.7905	318.871
26.161	480.55	25.8255	984.72	26.071	317	20.8235	341.837	20.8235	272.728
26.194	426.62	25.8585	763	26.104	294	20.8565	404.287	20.8565	294.224
26.227	376.92	25.8915	637.4	26.137	327	20.8895	344.666	20.8895	305.191
26.26	354.82	25.9245	545.07	26.17	304	20.9225	360.754	20.9225	274.276
26.293	340.45	25.9575	436.9	26.203	284	20.9555	363	20.9555	287.088
26.326	324.86	25.9905	373	26.236	280	20.9885	330.398	20.9885	282.832
26.359	322.13	26.0235	331.62	26.269	294	21.0215	400.689	21.0215	305.449
26.392	323.72	26.0565	299.85	26.302	274	21.0545	381.19	21.0545	306.432
26.425	311.31	26.0895	284.58	26.335	303	21.0875	387.805	21.0875	302.627
26.458	299	26.1225	250.19	26.368	283	21.1205	364.253	21.1205	311.967
26.491	319.97	26.1555	244.58	26.401	292	21.1535	359.818	21.1535	300.095
26.524	285.42	26.1885	212.91	26.434	276	21.1865	332.621	21.1865	310.69
26.557	293.49	26.2215	203.74	26.467	291	21.2195	350.571	21.2195	275.161
26.59	299.57	26.2545	208.96	26.5	306	21.2525	341.4	21.2525	292.299
26.623	296.15	26.2875	187.15	26.533	279	21.2855	351.58	21.2855	298.465
26.656	296.51	26.3205	166.96	26.566	286	21.3185	365.811	21.3185	305.547
26.689	288.81	26.3535	196.45	26.599	277	21.3515	383.841	21.3515	293.901
26.722	264.04	26.3865	195.87	26.632	278	21.3845	410.882	21.3845	300.671
26.755	297	26.4195	167.37	26.665	290	21.4175	393.913	21.4175	322.919
26.788	317.24	26.4525	168.75	26.698	320	21.4505	414.278	21.4505	303.243
26.821	329.41	26.4855	170.23	26.731	306	21.4835	393.809	21.4835	320.351
26.854	341.49	26.5185	175.76	26.764	293	21.5165	384.431	21.5165	312.635
26.887	323.6	26.5515	180.59	26.797	311	21.5495	408.985	21.5495	312.993
26.92	371.39	26.5845	169.56	26.83	337	21.5825	410.85	21.5825	301.661
26.953	403.93	26.6175	163.61	26.863	368	21.6155	381.004	21.6155	316.073
26.986	406.26	26.6505	170.18	26.896	400	21.6485	387.733	21.6485	320.204
27.019	452.74	26.6835	183.72	26.929	457	21.6815	391.381	21.6815	308.228
27.052	485.84	26.7165	182.16	26.962	497	21.7145	399.266	21.7145	317.869
27.085	533.46	26.7495	191.04	26.995	605	21.7475	411.542	21.7475	314.603
27.118	651.61	26.7825	209.96	27.028	739	21.7805	396.669	21.7805	304.845
27.151	820.57	26.8155	211.12	27.061	885	21.8135	382.305	21.8135	310.781
27.184	1055.27	26.8485	237.07	27.094	1022	21.8465	362.218	21.8465	312.133
27.217	1384.53	26.8815	266.09	27.127	1115	21.8795	361.574	21.8795	310.619
27.25	1938.29	26.9145	335.14	27.16	1217	21.9125	361.876	21.9125	318.326
27.283	2681.85	26.9475	374.26	27.193	1325	21.9455	376.725	21.9455	317.312
27.316	3516.45	26.9805	489.78	27.226	1461	21.9785	382.933	21.9785	324.048
27.349	4389.84	27.0135	587.91	27.259	1660	22.0115	363.532	22.0115	322.324
27.382	4981.39	27.0465	698.74	27.292	1908	22.0445	381.539	22.0445	301.281
27.415	4904.85	27.0795	840.58	27.325	2060	22.0775	396.505	22.0775	295
27.448	4157.95	27.1125	1032.17	27.358	2026	22.1105	396.221	22.1105	290.036
27.481	3213.37	27.1455	1325.17	27.391	1813	22.1435	404.123	22.1435	287.07
27.514	2333.05	27.1785	1704.5	27.424	1497	22.1765	410.242	22.1765	293.13
27.547	1554.13	27.2115	2143.5	27.457	1181	22.2095	421.24	22.2095	314.188
27.58	1084.77	27.2445	2601.25	27.49	852	22.2425	412.982	22.2425	331.585
27.613	813.37	27.2775	2815.99	27.523	635	22.2755	401.493	22.2755	320.94
27.646	651.98	27.3105	2772.56	27.556	512	22.3085	414.884	22.3085	321.747
27.679	548.15	27.3435	2405.8	27.589	426	22.3415	410.586	22.3415	325.981
27.712	445.96	27.3765	1858.82	27.622	356	22.3745	385.952	22.3745	327.045
27.745	402.5	27.4095	1362.42	27.655	286	22.4075	406.45	22.4075	298.95
27.778	373.23	27.4425	951.92	27.688	276	22.4405	415.254	22.4405	299.122
27.811	337.87	27.4755	659.65	27.721	275	22.4735	401.244	22.4735	320.059
27.844	325.55	27.5085	465.75	27.754	245	22.5065	424.287	22.5065	335.591
27.877	332.29	27.5415	336.78	27.787	242	22.5395	446.861	22.5395	345.261
27.91	299.91	27.5745	273.24	27.82	258	22.5725	451.194	22.5725	339.777
27.943	273.96	27.6075	234.53	27.853	231	22.6055	449.15	22.6055	358.29
27.976	251.28	27.6405	200.75	27.886	216	22.6385	425.755	22.6385	336.783
28.009	262.7	27.6735	179.74	27.919	207	22.6715	431.455	22.6715	312.709
28.042	246.29	27.7065	163.52	27.952	204	22.7045	447.682	22.7045	320.146
28.075	237.85	27.7395	154.8	27.985	188	22.7375	402.433	22.7375	335.678
28.108	242	27.7725	149.54	28.018	207	22.7705	424.358	22.7705	326.008
28.141	248.82	27.8055	135.62	28.051	203	22.8035	450.273	22.8035	324.601
28.174	253.09	27.8385	121.93	28.084	189	22.8365	465.017	22.8365	332.883
28.207	221.54	27.8715	117.08	28.117	218	22.8695	445.037	22.8695	329.396
28.24	249.4	27.9045	110.67	28.15	187	22.9025	439.113	22.9025	377.614
28.273	246.96	27.9375	106.76	28.183	195	22.9355	434.811	22.9355	313.893
28.306	255.5	27.9705	109.87	28.216	175	22.9685	443.923	22.9685	331.149
28.339	268.61	28.0035	105.45	28.249	178	23.0015	467.272	23.0015	367.12
28.372	238.69	28.0365	102.86	28.282	192	23.0345	430.46	23.0345	360
28.405	280.48	28.0695	105.99	28.315	198	23.0675	441.799	23.0675	358.984
28.438	275.3	28.1025	102.11	28.348	174	23.1005	420.016	23.1005	347.208
28.471	277.58	28.1355	101.73	28.381	186	23.1335	445.228	23.1335	337.653
28.504	254.82	28.1685	99.78	28.414	179	23.1665	433.841	23.1665	347.533
28.537	231.96	28.2015	94.63	28.447	180	23.1995	450.455	23.1995	338.818
28.57	231	28.2345	100.26	28.48	166	23.2325	435.751	23.2325	361.035
28.603	231.28	28.2675	92.86	28.513	197	23.2655	469.604	23.2655	317.123
28.636	255.97	28.3005	84.79	28.546	217	23.2985	425.173	23.2985	330.946
28.669	202.75	28.3335	90.98	28.579	172	23.3315	499.748	23.3315	328.049
28.702	206.87	28.3665	93.81	28.612	169	23.3645	462.165	23.3645	320.233
28.735	237.74	28.3995	89.93	28.645	204	23.3975	450.459	23.3975	326.708
28.768	232.36	28.4325	91.04	28.678	176	23.4305	428.251	23.4305	360.096
28.801	227.32	28.4655	84.25	28.711	180	23.4635	468.05	23.4635	334.944
28.834	253.76	28.4985	89.53	28.744	171	23.4965	459.036	23.4965	324.717
28.867	243.26	28.5315	92.65	28.777	180	23.5295	423.509	23.5295	338.523
28.9	247.39	28.5645	87.2	28.81	183	23.5625	452.221	23.5625	345.37
28.933	246.23	28.5975	88.17	28.843	173	23.5955	456.882	23.5955	330.117
28.966	273.91	28.6305	87.37	28.876	178	23.6285	481.353	23.6285	353.222
28.999	244.48	28.6635	89.87	28.909	218	23.6615	479	23.6615	330.43
29.032	238.15	28.6965	91.06	28.942	192	23.6945	473.778	23.6945	324.311
29.065	241.34	28.7295	90.72	28.975	186	23.7275	455.532	23.7275	378.9
29.098	240.36	28.7625	87.87	29.008	184	23.7605	496.235	23.7605	364.606
29.131	236.76	28.7955	89.56	29.041	191	23.7935	501.967	23.7935	363.839
29.164	237.59	28.8285	87.59	29.074	201	23.8265	460.512	23.8265	359.443
29.197	245.05	28.8615	90.69	29.107	223	23.8595	491.406	23.8595	366.594
29.23	285.56	28.8945	90.61	29.14	212	23.8925	475.33	23.8925	377.455
29.263	265.9	28.9275	87.58	29.173	229	23.9255	477.583	23.9255	348.25
29.296	279.12	28.9605	92.55	29.206	211	23.9585	492.893	23.9585	352.123
29.329	262.07	28.9935	98.52	29.239	213	23.9915	486.04	23.9915	346.04
29.362	275.34	29.0265	96.2	29.272	231	24.0245	497.797	24.0245	372.875
29.395	279.75	29.0595	101.74	29.305	227	24.0575	496.241	24.0575	368.776
29.428	294.69	29.0925	99.07	29.338	223	24.0905	522.788	24.0905	366.849
29.461	309.51	29.1255	99.75	29.371	226	24.1235	501.315	24.1235	340.436
29.494	302.28	29.1585	100.1	29.404	220	24.1565	520.376	24.1565	336.344
29.527	301.6	29.1915	101.48	29.437	199	24.1895	544.548	24.1895	352.132
29.56	311.09	29.2245	100.14	29.47	217	24.2225	544.147	24.2225	363.78
29.593	273.92	29.2575	106.5	29.503	225	24.2555	530.668	24.2555	353.78
29.626	259.29	29.2905	119.38	29.536	231	24.2885	534.487	24.2885	356.487
29.659	274.1	29.3235	132.51	29.569	243	24.3215	543.417	24.3215	366.021
29.692	263.96	29.3565	117.83	29.602	243	24.3545	556.241	24.3545	341.969
29.725	264.63	29.3895	139.84	29.635	251	24.3875	570.369	24.3875	358.738
29.758	258.21	29.4225	130.15	29.668	242	24.4205	568.77	24.4205	365.311
29.791	220.86	29.4555	144	29.701	249	24.4535	555.695	24.4535	338.265
29.824	217.39	29.4885	176.22	29.734	265	24.4865	565.772	24.4865	330.705
29.857	221.38	29.5215	164.33	29.767	263	24.5195	593.21	24.5195	341.983
29.89	212	29.5545	177.73	29.8	266	24.5525	586.949	24.5525	352.063
29.923	203.4	29.5875	183.52	29.833	255	24.5855	572.516	24.5855	369.093
29.956	172.82	29.6205	189.57	29.866	243	24.6185	569.605	24.6185	370.757
29.989	148.56	29.6535	185.36	29.899	247	24.6515	580.246	24.6515	353.655
30.022	157.29	29.6865	193.03	29.932	252	24.6845	594.279	24.6845	356.513
30.055	164.9	29.7195	174.14	29.965	234	24.7175	585.475	24.7175	350.424
30.088	151.59	29.7525	180.24	29.998	199	24.7505	586.599	24.7505	344.558
30.121	141.86	29.7855	155.03	30.031	184	24.7835	599.7	24.7835	369.963
30.154	144.67	29.8185	140.72	30.064	177	24.8165	630.048	24.8165	396.365
30.187	144.98	29.8515	144.86	30.097	171	24.8495	657.166	24.8495	400.951
30.22	142	29.8845	128.05	30.13	170	24.8825	643.496	24.8825	384.832
30.253	144.28	29.9175	118.02	30.163	161	24.9155	651.184	24.9155	390.91
30.286	141.77	29.9505	96.91	30.196	150	24.9485	664.991	24.9485	399.995
30.319	132.42	29.9835	87	30.229	140	24.9815	656.271	24.9815	401.434
30.352	131.25	30.0165	83.63	30.262	147	25.0145	678.195	25.0145	402.094
30.385	128.27	30.0495	88.01	30.295	148	25.0475	697.108	25.0475	379.849
30.418	136.68	30.0825	74.5	30.328	177	25.0805	685.746	25.0805	407.793
30.451	139.64	30.1155	67.89	30.361	165	25.1135	678.487	25.1135	426.568
30.484	141.6	30.1485	59.74	30.394	151	25.1465	691.344	25.1465	404.323
30.517	122.11	30.1815	59.86	30.427	144	25.1795	747.898	25.1795	417.204
30.55	123.68	30.2145	63.91	30.46	134	25.2125	750.784	25.2125	417.742
30.583	147.66	30.2475	61.4	30.493	153	25.2455	767.25	25.2455	403
30.616	124.68	30.2805	58.3	30.526	154	25.2785	772.04	25.2785	406.327
30.649	128.64	30.3135	54.86	30.559	155	25.3115	797.824	25.3115	415.2
30.682	124	30.3465	52.47	30.592	144	25.3445	834.78	25.3445	410.911
30.715	121.78	30.3795	54.94	30.625	142	25.3775	822.977	25.3775	420.396
30.748	113.57	30.4125	61.04	30.658	145	25.4105	880.755	25.4105	419.151
30.781	117.24	30.4455	62.63	30.691	137	25.4435	868.907	25.4435	375.837
30.814	121.52	30.4785	57.79	30.724	134	25.4765	869.839	25.4765	394.324
30.847	116.27	30.5115	56.45	30.757	116	25.5095	928.833	25.5095	404.948
30.88	128.72	30.5445	56.15	30.79	126	25.5425	948.003	25.5425	454.772
30.913	125.1	30.5775	52.91	30.823	130	25.5755	968.981	25.5755	441.799
30.946	113.93	30.6105	56.19	30.856	130	25.6085	996.011	25.6085	406.557
30.979	126.88	30.6435	62.76	30.889	122	25.6415	1099.21	25.6415	423.139
31.012	109.33	30.6765	62.26	30.922	130	25.6745	1092.6	25.6745	457.993
31.045	123.08	30.7095	59.08	30.955	126	25.7075	1111.53	25.7075	426.293
31.078	122.8	30.7425	58.54	30.988	128	25.7405	1267.03	25.7405	430.243
31.111	105.66	30.7755	54.92	31.021	125	25.7735	1229.93	25.7735	435.728
31.144	118.8	30.8085	54.54	31.054	116	25.8065	1408.17	25.8065	469.965
31.177	138.22	30.8415	57.61	31.087	106	25.8395	1441.52	25.8395	469.568
31.21	108.49	30.8745	54.75	31.12	105	25.8725	1508.02	25.8725	493.799
31.243	147	30.9075	55.78	31.153	117	25.9055	1607.74	25.9055	474.052
31.276	107.51	30.9405	54.31	31.186	121	25.9385	1701.55	25.9385	444.457
31.309	115.77	30.9735	55.1	31.219	111	25.9715	1802.16	25.9715	467.331
31.342	123.7	31.0065	51.35	31.252	119	26.0045	1934.53	26.0045	468.959
31.375	131.59	31.0395	52.96	31.285	101	26.0375	2001.55	26.0375	485.096
31.408	140.43	31.0725	57.66	31.318	115	26.0705	2083.47	26.0705	453.303
31.441	145.62	31.1055	55.09	31.351	111	26.1035	2089.92	26.1035	472.196
31.474	125.04	31.1385	49.82	31.384	138	26.1365	2120.9	26.1365	468.546
31.507	137.38	31.1715	54.28	31.417	118	26.1695	1979.7	26.1695	426.771
31.54	112.42	31.2045	53.5	31.45	116	26.2025	1858.73	26.2025	446.742
31.573	121.23	31.2375	56.31	31.483	116	26.2355	1657.74	26.2355	422.128
31.606	128.17	31.2705	60.53	31.516	125	26.2685	1671.2	26.2685	431.734
31.639	113.73	31.3035	50.55	31.549	134	26.3015	1501.25	26.3015	431.463
31.672	137.74	31.3365	54.07	31.582	123	26.3345	1393.19	26.3345	421.836
31.705	130.66	31.3695	59.83	31.615	103	26.3675	1287.75	26.3675	398.669
31.738	125.57	31.4025	56.57	31.648	126	26.4005	1212.26	26.4005	437.62
31.771	102.67	31.4355	50.78	31.681	98	26.4335	1147.32	26.4335	386.774
31.804	119.77	31.4685	59.42	31.714	119	26.4665	1103.48	26.4665	368.652
31.837	115.96	31.5015	50	31.747	111	26.4995	1009.55	26.4995	373.389
31.87	120.6	31.5345	44.59	31.78	120	26.5325	973.399	26.5325	354.555
31.903	123	31.5675	55.86	31.813	119	26.5655	924.581	26.5655	367.359
31.936	119.33	31.6005	46.5	31.846	108	26.5985	867.28	26.5985	384.979
31.969	113.67	31.6335	55.86	31.879	108	26.6315	841.93	26.6315	371.737
32.002	122.64	31.6665	53.13	31.912	109	26.6645	804.788	26.6645	372.773
32.035	127.7	31.6995	51.4	31.945	121	26.6975	761.158	26.6975	372.53
32.068	124.58	31.7325	49.8	31.978	113	26.7305	794.333	26.7305	356.01
32.101	139.78	31.7655	57.04	32.011	116	26.7635	761.834	26.7635	334.288
32.134	123.63	31.7985	52.9	32.044	118	26.7965	757.307	26.7965	354.555
32.167	120.04	31.8315	45.34	32.077	111	26.8295	732.324	26.8295	347.123
32.2	130.7	31.8645	58.64	32.11	115	26.8625	693.076	26.8625	346.985
32.233	131.52	31.8975	56.82	32.143	120	26.8955	670.255	26.8955	369.454
32.266	132.43	31.9305	59	32.176	118	26.9285	646.046	26.9285	370.523
32.299	141.14	31.9635	55.91	32.209	119	26.9615	653.379	26.9615	334.764
32.332	133.18	31.9965	59.48	32.242	124	26.9945	632.927	26.9945	339.53
32.365	127.42	32.0295	51.03	32.275	111	27.0275	608.432	27.0275	364.811
32.398	136.13	32.0625	50.67	32.308	102	27.0605	632.972	27.0605	347.802
32.431	140.46	32.0955	53.2	32.341	115	27.0935	624.258	27.0935	344.642
32.464	143.73	32.1285	49.33	32.374	115	27.1265	610.063	27.1265	345.348
32.497	135.57	32.1615	54.3	32.407	109	27.1595	615.898	27.1595	317.939
32.53	141.22	32.1945	49.15	32.44	105	27.1925	578.198	27.1925	302.504
32.563	141.68	32.2275	52.57	32.473	104	27.2255	567.111	27.2255	293.165
32.596	132.74	32.2605	56.11	32.506	108	27.2585	610.163	27.2585	305.996
32.629	140.94	32.2935	52.23	32.539	108	27.2915	617.007	27.2915	325.869
32.662	141.09	32.3265	51.38	32.572	111	27.3245	597.823	27.3245	304.571
32.695	137.78	32.3595	52.8	32.605	112	27.3575	598.853	27.3575	295.705
32.728	145.78	32.3925	55.86	32.638	110	27.3905	606.286	27.3905	307.571
32.761	156.65	32.4255	57.49	32.671	118	27.4235	608	27.4235	301.594
32.794	153.62	32.4585	59.81	32.704	116	27.4565	610.823	27.4565	291.177
32.827	156	32.4915	60.04	32.737	121	27.4895	585.315	27.4895	294.812
32.86	156.76	32.5245	58.36	32.77	132	27.5225	543.913	27.5225	311.157
32.893	151.75	32.5575	62.88	32.803	117	27.5555	555.288	27.5555	318.365
32.926	151.3	32.5905	62.22	32.836	115	27.5885	550.067	27.5885	318.647
32.959	171.03	32.6235	65.61	32.869	119	27.6215	544.961	27.6215	307.459
32.992	172.67	32.6565	66.28	32.902	115	27.6545	573.345	27.6545	300.75
33.025	183.1	32.6895	65.9	32.935	108	27.6875	564.446	27.6875	322.391
33.058	219.49	32.7225	62.6	32.968	134	27.7205	543.469	27.7205	312.834
33.091	254.13	32.7555	63.6	33.001	124	27.7535	535.605	27.7535	311.264
33.124	281.29	32.7885	71.63	33.034	137	27.7865	546.706	27.7865	283.875
33.157	320.2	32.8215	72.26	33.067	144	27.8195	551.075	27.8195	296.113
33.19	359.82	32.8545	68.57	33.1	161	27.8525	529.252	27.8525	299.988
33.223	430.79	32.8875	71.35	33.133	174	27.8855	531.911	27.8855	295.433
33.256	460.71	32.9205	82.22	33.166	195	27.9185	538.905	27.9185	301.81
33.289	428.59	32.9535	88.74	33.199	182	27.9515	540.505	27.9515	308.214
33.322	431.69	32.9865	96.18	33.232	199	27.9845	536.407	27.9845	309.402
33.355	408.72	33.0195	110.57	33.265	212	28.0175	543.318	28.0175	310.058
33.388	416.71	33.0525	128.27	33.298	210	28.0505	546.716	28.0505	307.932
33.421	426.62	33.0855	143.8	33.331	221	28.0835	534.207	28.0835	313.576
33.454	465.35	33.1185	159.25	33.364	189	28.1165	525	28.1165	295.699
33.487	498.09	33.1515	180.78	33.397	205	28.1495	516.322	28.1495	296.755
33.52	520.19	33.1845	190.16	33.43	232	28.1825	469.006	28.1825	316.752
33.553	550.16	33.2175	192	33.463	267	28.2155	514.064	28.2155	337.125
33.586	620.78	33.2505	190.18	33.496	266	28.2485	484.797	28.2485	343.405
33.619	694.11	33.2835	180.47	33.529	297	28.2815	502.918	28.2815	322.528
33.652	752.01	33.3165	182.42	33.562	397	28.3145	519.795	28.3145	348.329
33.685	829.73	33.3495	181.72	33.595	398	28.3475	483.775	28.3475	337.339
33.718	920.25	33.3825	177.43	33.628	488	28.3805	540.064	28.3805	297.739
33.751	1051.04	33.4155	181.87	33.661	528	28.4135	522.476	28.4135	312.037
33.784	1002.71	33.4485	200.95	33.694	601	28.4465	533.059	28.4465	312.233
33.817	990.34	33.4815	216.74	33.727	700	28.4795	454.215	28.4795	280.842
33.85	871.9	33.5145	254.38	33.76	645	28.5125	472.975	28.5125	267.019
33.883	789.95	33.5475	285.79	33.793	683	28.5455	484.832	28.5455	262.07
33.916	655.3	33.5805	331.24	33.826	682	28.5785	501.548	28.5785	256.16
33.949	520.03	33.6135	402.25	33.859	705	28.6115	513.529	28.6115	293.469
33.982	455.11	33.6465	471.63	33.892	753	28.6445	501.675	28.6445	321.547
34.015	311.3	33.6795	545.93	33.925	671	28.6775	475.742	28.6775	293.065
34.048	276.09	33.7125	649.49	33.958	645	28.7105	453.698	28.7105	279.003
34.081	211.94	33.7455	725.24	33.991	480	28.7435	519.353	28.7435	288.012
34.114	196.1	33.7785	724.25	34.024	389	28.7765	467.66	28.7765	263.869
34.147	180.8	33.8115	651.82	34.057	333	28.8095	489.317	28.8095	274.273
34.18	141.38	33.8445	554.12	34.09	288	28.8425	501.723	28.8425	288.212
34.213	141.17	33.8775	452.89	34.123	207	28.8755	452.283	28.8755	259.054
34.246	141.15	33.9105	359.21	34.156	182	28.9085	459.245	28.9085	283.644
34.279	160.25	33.9435	275.44	34.189	181	28.9415	489.533	28.9415	270.645
34.312	126.91	33.9765	207.24	34.222	181	28.9745	468.706	28.9745	253.853
34.345	126.3	34.0095	163.7	34.255	174	29.0075	464.618	29.0075	260.709
34.378	132.79	34.0425	127.1	34.288	169	29.0405	446.683	29.0405	275.742
34.411	122.21	34.0755	98.68	34.321	172	29.0735	467.864	29.0735	282.919
34.444	119.77	34.1085	94.12	34.354	164	29.1065	442.613	29.1065	284
34.477	113.91	34.1415	79.13	34.387	145	29.1395	475.475	29.1395	268.072
34.51	123.97	34.1745	82.18	34.42	144	29.1725	448.725	29.1725	247.338
34.543	129.47	34.2075	73.22	34.453	149	29.2055	443.798	29.2055	250.065
34.576	125.66	34.2405	73.36	34.486	157	29.2385	457.088	29.2385	276.778
34.609	126.13	34.2735	58.79	34.519	137	29.2715	423.481	29.2715	254.144
34.642	122.81	34.3065	66.74	34.552	136	29.3045	446.239	29.3045	241.695
34.675	112.78	34.3395	62.98	34.585	145	29.3375	443.204	29.3375	247.461
34.708	119.09	34.3725	61.58	34.618	142	29.3705	459.459	29.3705	248.66
34.741	123.34	34.4055	51.9	34.651	139	29.4035	433.875	29.4035	249.315
34.774	120.41	34.4385	55.9	34.684	133	29.4365	428.183	29.4365	268.696
34.807	117.73	34.4715	66.8	34.717	122	29.4695	422.727	29.4695	255.614
34.84	115.76	34.5045	57.54	34.75	132	29.5025	395.179	29.5025	258.724
34.873	113.78	34.5375	63.62	34.783	127	29.5355	417.586	29.5355	256.865
34.906	117.18	34.5705	66.32	34.816	133	29.5685	434.653	29.5685	247.812
34.939	116.5	34.6035	68.1	34.849	140	29.6015	399.018	29.6015	234.789
34.972	126	34.6365	60.99	34.882	127	29.6345	397.616	29.6345	241.928
35.005	135.56	34.6695	56.16	34.915	126	29.6675	421.787	29.6675	256.225
35.038	132.18	34.7025	66.99	34.948	138	29.7005	428.544	29.7005	264.523
35.071	124.2	34.7355	54.7	34.981	143	29.7335	433.778	29.7335	253.542
35.104	128.85	34.7685	59.94	35.014	134	29.7665	410.532	29.7665	233.299
35.137	122.77	34.8015	60.66	35.047	144	29.7995	384.494	29.7995	226.483
35.17	133.28	34.8345	73.26	35.08	149	29.8325	410.128	29.8325	233.874
35.203	147.38	34.8675	65.99	35.113	149	29.8655	417.786	29.8655	233.873
35.236	143.99	34.9005	63.98	35.146	157	29.8985	386.243	29.8985	244.111
35.269	154.83	34.9335	62.12	35.179	154	29.9315	403.579	29.9315	253.348
35.302	177.91	34.9665	66.21	35.212	158	29.9645	428.382	29.9645	241.424
35.335	197.95	34.9995	69.42	35.245	174	29.9975	410.272	29.9975	256.455
35.368	208.46	35.0325	75.77	35.278	182	30.0305	410.674	30.0305	249.812
35.401	251.09	35.0655	81.83	35.311	177	30.0635	416.764	30.0635	230.685
35.434	303.21	35.0985	86.6	35.344	188	30.0965	408.473	30.0965	232.596
35.467	352.63	35.1315	89.34	35.377	225	30.1295	396.174	30.1295	218.379
35.5	385.3	35.1645	83.59	35.41	251	30.1625	383.9	30.1625	234.762
35.533	430.69	35.1975	99.59	35.443	234	30.1955	389.078	30.1955	256.691
35.566	467.53	35.2305	114.05	35.476	235	30.2285	399.611	30.2285	235.055
35.599	473.18	35.2635	130.55	35.509	245	30.2615	388.427	30.2615	216.272
35.632	415.73	35.2965	147.99	35.542	223	30.2945	375.316	30.2945	234.796
35.665	395.57	35.3295	164.33	35.575	189	30.3275	380.854	30.3275	256.607
35.698	336.35	35.3625	202.29	35.608	179	30.3605	395.779	30.3605	255.965
35.731	271.32	35.3955	228.17	35.641	167	30.3935	397.492	30.3935	251.278
35.764	222.25	35.4285	235.75	35.674	155	30.4265	389.944	30.4265	247.222
35.797	209.7	35.4615	229.19	35.707	153	30.4595	412.889	30.4595	235.011
35.83	187.71	35.4945	220.55	35.74	134	30.4925	383.961	30.4925	234.158
35.863	140.69	35.5275	201.5	35.773	131	30.5255	375.853	30.5255	219.043
35.896	136.7	35.5605	172.05	35.806	141	30.5585	353.04	30.5585	221.462
35.929	113.39	35.5935	143.55	35.839	131	30.5915	408	30.5915	257.496
35.962	110.62	35.6265	114.12	35.872	115	30.6245	398.142	30.6245	223.223
35.995	110.61	35.6595	98.51	35.905	119	30.6575	362.546	30.6575	234.523
36.028	118	35.6925	87.39	35.938	99	30.6905	389.55	30.6905	225.629
36.061	117.23	35.7255	73.61	35.971	108	30.7235	368.664	30.7235	241.275
36.094	109.89	35.7585	70.83	36.004	96	30.7565	353.197	30.7565	253.444
36.127	91.64	35.7915	67.41	36.037	94	30.7895	369.462	30.7895	245.072
36.16	95.54	35.8245	59.49	36.07	98	30.8225	349.208	30.8225	213.615
36.193	92.93	35.8575	56.46	36.103	115	30.8555	381.191	30.8555	234.809
36.226	100.73	35.8905	57.2	36.136	96	30.8885	374.796	30.8885	239.878
36.259	99.02	35.9235	57.26	36.169	93	30.9215	381.029	30.9215	219.743
36.292	110.54	35.9565	56.22	36.202	87	30.9545	359.336	30.9545	242.263
36.325	105.7	35.9895	53.34	36.235	98	30.9875	393.747	30.9875	260.394
36.358	134.87	36.0225	53.08	36.268	106	31.0205	388.773	31.0205	247.751
36.391	107.42	36.0555	53.54	36.301	111	31.0535	382.798	31.0535	215.975
36.424	87.2	36.0885	49.06	36.334	116	31.0865	374.711	31.0865	215.176
36.457	100.02	36.1215	51.69	36.367	98	31.1195	352.001	31.1195	228.999
36.49	106.93	36.1545	51.17	36.4	104	31.1525	397.416	31.1525	235.911
36.523	87.46	36.1875	49.9	36.433	94	31.1855	382.406	31.1855	236.975
36.556	93.75	36.2205	42.58	36.466	101	31.2185	352.178	31.2185	239.886
36.589	100.66	36.2535	46.97	36.499	97	31.2515	398.468	31.2515	236.203
36.622	116.97	36.2865	51.37	36.532	87	31.2845	386.012	31.2845	199.468
36.655	88.35	36.3195	49.2	36.565	123	31.3175	360.05	31.3175	239.508
36.688	99.71	36.3525	51.71	36.598	99	31.3505	368.026	31.3505	204.72
36.721	98.3	36.3855	52.34	36.631	102	31.3835	392.369	31.3835	209.988
36.754	96.22	36.4185	53.85	36.664	91	31.4165	399.431	31.4165	211.886
36.787	97.75	36.4515	51.03	36.697	107	31.4495	380.783	31.4495	242.573
36.82	85.91	36.4845	57.02	36.73	122	31.4825	375.417	31.4825	222.035
36.853	89.1	36.5175	43.31	36.763	117	31.5155	356.339	31.5155	218.848
36.886	94.19	36.5505	44.18	36.796	96	31.5485	353	31.5485	224.849
36.919	85.92	36.5835	57.58	36.829	119	31.5815	390.032	31.5815	232.584
36.952	92.13	36.6165	51.65	36.862	108	31.6145	367.209	31.6145	227.518
36.985	100.4	36.6495	45	36.895	111	31.6475	363.191	31.6475	203.666
37.018	98.06	36.6825	49.47	36.928	92	31.6805	363.215	31.6805	183.87
37.051	108.62	36.7155	55.87	36.961	99	31.7135	391.578	31.7135	226.342
37.084	108.19	36.7485	57.62	36.994	105	31.7465	355.936	31.7465	236.961
37.117	94.26	36.7815	56.35	37.027	112	31.7795	341.253	31.7795	218.817
37.15	93.68	36.8145	56.12	37.06	101	31.8125	350.548	31.8125	228.423
37.183	92.83	36.8475	52.81	37.093	94	31.8455	359.053	31.8455	232.556
37.216	110.5	36.8805	51.89	37.126	125	31.8785	343.98	31.8785	241.219
37.249	99.13	36.9135	46.2	37.159	114	31.9115	346.055	31.9115	248.483
37.282	105.41	36.9465	57.73	37.192	102	31.9445	341.793	31.9445	247.948
37.315	106.61	36.9795	56.69	37.225	109	31.9775	341.356	31.9775	228.205
37.348	109.95	37.0125	52.88	37.258	127	32.0105	352.22	32.0105	219.659
37.381	104.57	37.0455	45.32	37.291	117	32.0435	340.205	32.0435	236.149
37.414	110.17	37.0785	49.88	37.324	135	32.0765	334.8	32.0765	220.301
37.447	99.17	37.1115	46.05	37.357	138	32.1095	348.793	32.1095	212.827
37.48	110.37	37.1445	55.07	37.39	137	32.1425	335.935	32.1425	218.216
37.513	127.59	37.1775	60.52	37.423	131	32.1755	349.197	32.1755	225.549
37.546	112.44	37.2105	45.84	37.456	126	32.2085	358.842	32.2085	225.338
37.579	109.73	37.2435	61.51	37.489	137	32.2415	355.28	32.2415	240.243
37.612	112.52	37.2765	55.87	37.522	142	32.2745	350.311	32.2745	235.047
37.645	115.57	37.3095	57.41	37.555	133	32.3075	336.283	32.3075	236.889
37.678	114.58	37.3425	57.14	37.588	121	32.3405	331.129	32.3405	240.357
37.711	108.48	37.3755	57.65	37.621	132	32.3735	356.898	32.3735	222.688
37.744	111.06	37.4085	51.29	37.654	144	32.4065	362.273	32.4065	215
37.777	115.99	37.4415	58.73	37.687	130	32.4395	340.069	32.4395	228.839
37.81	113.64	37.4745	63.4	37.72	114	32.4725	335.926	32.4725	229.034
37.843	121.73	37.5075	60.96	37.753	123	32.5055	321.117	32.5055	221.034
37.876	135.08	37.5405	61.86	37.786	134	32.5385	322.534	32.5385	234.476
37.909	126.41	37.5735	57.68	37.819	140	32.5715	336.352	32.5715	230.795
37.942	118.73	37.6065	56.62	37.852	147	32.6045	330.759	32.6045	212.397
37.975	132.79	37.6395	62.48	37.885	132	32.6375	341.837	32.6375	202.071
38.008	140.43	37.6725	64.14	37.918	132	32.6705	337.32	32.6705	211.795
38.041	137.1	37.7055	66.08	37.951	157	32.7035	327.428	32.7035	233.966
38.074	137.21	37.7385	71.09	37.984	170	32.7365	337.555	32.7365	228.249
38.107	124.63	37.7715	64.47	38.017	161	32.7695	347.701	32.7695	222.46
38.14	141.72	37.8045	67.4	38.05	149	32.8025	339.59	32.8025	237
38.173	151.63	37.8375	74.84	38.083	168	32.8355	348.094	32.8355	228.437
38.206	163.35	37.8705	73.52	38.116	178	32.8685	327.041	32.8685	215.959
38.239	157.2	37.9035	78.34	38.149	180	32.9015	323.759	32.9015	224
38.272	176.28	37.9365	77.89	38.182	195	32.9345	340.092	32.9345	224.609
38.305	209.3	37.9695	77.79	38.215	205	32.9675	352.832	32.9675	225.124
38.338	222.28	38.0025	82.53	38.248	241	33.0005	349.162	33.0005	221.883
38.371	229.73	38.0355	93.51	38.281	274	33.0335	351.8	33.0335	217.933
38.404	243.9	38.0685	99.81	38.314	269	33.0665	359.919	33.0665	223.383
38.437	242.24	38.1015	102.11	38.347	311	33.0995	352.001	33.0995	244.862
38.47	278.39	38.1345	101.64	38.38	328	33.1325	363.248	33.1325	231.111
38.503	297.59	38.1675	110.08	38.413	327	33.1655	331.106	33.1655	219.297
38.536	314	38.2005	122.99	38.446	361	33.1985	357.394	33.1985	225.221
38.569	323.28	38.2335	132.91	38.479	397	33.2315	401.046	33.2315	226.947
38.602	366.52	38.2665	151.83	38.512	410	33.2645	404.84	33.2645	215.425
38.635	397.76	38.2995	174.61	38.545	445	33.2975	440.503	33.2975	220.51
38.668	453.18	38.3325	194.13	38.578	447	33.3305	442.74	33.3305	213.765
38.701	473.28	38.3655	222.27	38.611	464	33.3635	466.335	33.3635	216.177
38.734	524.3	38.3985	241.07	38.644	468	33.3965	453.573	33.3965	208.063
38.767	548.63	38.4315	260.58	38.677	480	33.4295	484.669	33.4295	229.69
38.8	679.53	38.4645	300.91	38.71	513	33.4625	533.749	33.4625	232.749
38.833	801.18	38.4975	341.77	38.743	488	33.4955	515.973	33.4955	214.166
38.866	880.46	38.5305	374.28	38.776	519	33.5285	540.161	33.5285	226.385
38.899	1107.32	38.5635	406.34	38.809	562	33.5615	586.78	33.5615	230.227
38.932	1303.58	38.5965	462.18	38.842	558	33.5945	542.95	33.5945	219.414
38.965	1502.45	38.6295	493.7	38.875	610	33.6275	595.553	33.6275	226.452
38.998	1840.39	38.6625	531.37	38.908	672	33.6605	561.059	33.6605	213.715
39.031	2021.31	38.6955	595.79	38.941	728	33.6935	599.294	33.6935	239.709
39.064	2039.9	38.7285	695.14	38.974	694	33.7265	548.982	33.7265	218.987
39.097	2014.23	38.7615	814.8	39.007	664	33.7595	534.172	33.7595	208.126
39.13	1969.97	38.7945	935.51	39.04	584	33.7925	485.205	33.7925	224.59
39.163	1763.29	38.8275	1056.22	39.073	558	33.8255	484	33.8255	233.669
39.196	1491.98	38.8605	1135.76	39.106	486	33.8585	455.481	33.8585	208.333
39.229	1234.47	38.8935	1207.32	39.139	501	33.8915	442.744	33.8915	232.326
39.262	1094.67	38.9265	1217.31	39.172	414	33.9245	425.344	33.9245	219.195
39.295	841.55	38.9595	1182.42	39.205	368	33.9575	428.563	33.9575	221.651
39.328	738.67	38.9925	1132.72	39.238	349	33.9905	398.398	33.9905	220.2
39.361	674.82	39.0255	1055.79	39.271	309	34.0235	412.748	34.0235	235.973
39.394	612.73	39.0585	943.8	39.304	297	34.0565	415	34.0565	255.495
39.427	577.33	39.0915	786.12	39.337	311	34.0895	396.033	34.0895	220.066
39.46	520.18	39.1245	665.18	39.37	304	34.1225	391.301	34.1225	211.452
39.493	451.41	39.1575	582.01	39.403	294	34.1555	354.179	34.1555	227.737
39.526	422.64	39.1905	468	39.436	240	34.1885	350.297	34.1885	221.934
39.559	427.14	39.2235	402.79	39.469	265	34.2215	373.724	34.2215	213.508
39.592	406.56	39.2565	357.58	39.502	292	34.2545	376.603	34.2545	229.576
39.625	404.94	39.2895	334.3	39.535	328	34.2875	384.649	34.2875	222.992
39.658	467.32	39.3225	319.12	39.568	344	34.3205	378.49	34.3205	251.719
39.691	440.72	39.3555	296.57	39.601	338	34.3535	352.409	34.3535	238.17
39.724	408.98	39.3885	284.62	39.634	334	34.3865	339.013	34.3865	230.252
39.757	395.62	39.4215	289	39.667	325	34.4195	338.471	34.4195	220.436
39.79	382.12	39.4545	282.99	39.7	293	34.4525	328.154	34.4525	207.6
39.823	368.73	39.4875	287.4	39.733	289	34.4855	319.027	34.4855	228.154
39.856	367.8	39.5205	312.11	39.766	260	34.5185	320.489	34.5185	219.16
39.889	344.24	39.5535	320.85	39.799	243	34.5515	334.332	34.5515	239.776
39.922	341.78	39.5865	334.54	39.832	222	34.5845	348.742	34.5845	246.275
39.955	333.42	39.6195	322.1	39.865	216	34.6175	306.151	34.6175	243
39.988	322.45	39.6525	329.54	39.898	207	34.6505	329.893	34.6505	215.17
40.021	293.88	39.6855	309.05	39.931	201	34.6835	323.637	34.6835	226.017
40.054	307.1	39.7185	290.31	39.964	180	34.7165	318.682	34.7165	226.074
40.087	316.66	39.7515	283.52	39.997	175	34.7495	334.311	34.7495	232.841
40.12	270.06	39.7845	238.92	40.03	192	34.7825	324.681	34.7825	227.487
40.153	265.46	39.8175	237.15	40.063	179	34.8155	300.984	34.8155	221.672
40.186	263.06	39.8505	218.95	40.096	148	34.8485	309.283	34.8485	235.284
40.219	225.99	39.8835	199.84	40.129	147	34.8815	311.267	34.8815	252.498
40.252	205.26	39.9165	182.99	40.162	150	34.9145	317.29	34.9145	256.724
40.285	211.58	39.9495	173.37	40.195	141	34.9475	333.201	34.9475	234.263
40.318	213.77	39.9825	150.4	40.228	141	34.9805	330.792	34.9805	227.937
40.351	193.17	40.0155	139	40.261	147	35.0135	320.41	35.0135	242.065
40.384	179.99	40.0485	132.04	40.294	140	35.0465	321.937	35.0465	252.937
40.417	179.09	40.0815	123.48	40.327	141	35.0795	318.86	35.0795	262.414
40.45	182.15	40.1145	119.27	40.36	138	35.1125	332.451	35.1125	259.828
40.483	184.4	40.1475	111.18	40.393	137	35.1455	359.542	35.1455	256.288
40.516	179	40.1805	97.77	40.426	150	35.1785	334.084	35.1785	262.559
40.549	162.04	40.2135	104.4	40.459	139	35.2115	324.182	35.2115	263.974
40.582	138.31	40.2465	89.55	40.492	124	35.2445	346.125	35.2445	255.384
40.615	141.32	40.2795	85.46	40.525	124	35.2775	333.523	35.2775	258.768
40.648	146.22	40.3125	80.76	40.558	120	35.3105	332.127	35.3105	280.493
40.681	138.93	40.3455	79.75	40.591	109	35.3435	346.871	35.3435	278.64
40.714	134.74	40.3785	78.43	40.624	106	35.3765	341.761	35.3765	262.536
40.747	124.15	40.4115	73.84	40.657	113	35.4095	315.426	35.4095	275.564
40.78	116.85	40.4445	69.02	40.69	110	35.4425	329.001	35.4425	279.25
40.813	134.32	40.4775	68.25	40.723	102	35.4755	346.026	35.4755	279.298
40.846	133.05	40.5105	71.11	40.756	94	35.5085	332.904	35.5085	288.089
40.879	151.27	40.5435	67.98	40.789	96	35.5415	347.081	35.5415	291.035
40.912	111.56	40.5765	62.82	40.822	111	35.5745	395.496	35.5745	308.466
40.945	102.7	40.6095	59.96	40.855	92	35.6075	370.791	35.6075	305.827
40.978	117.28	40.6425	57.26	40.888	80	35.6405	359.196	35.6405	290.268
41.011	135.46	40.6755	57.85	40.921	96	35.6735	356.745	35.6735	292.276
41.044	110.45	40.7085	54.32	40.954	84	35.7065	355.515	35.7065	290.176
41.077	116.6	40.7415	49.57	40.987	90	35.7395	358.6	35.7395	278.9
41.11	108.7	40.7745	50.38	41.02	87	35.7725	373.348	35.7725	316.999
41.143	99.07	40.8075	52.93	41.053	101	35.8055	373.661	35.8055	353.393
41.176	104.08	40.8405	50.6	41.086	91	35.8385	388.034	35.8385	292.107
41.209	94.55	40.8735	51.54	41.119	99	35.8715	398.54	35.8715	322.359
41.242	109.89	40.9065	51.46	41.152	92	35.9045	375.672	35.9045	329.671
41.275	127.75	40.9395	51.52	41.185	91	35.9375	407.304	35.9375	360.467
41.308	122.44	40.9725	54.82	41.218	91	35.9705	401.113	35.9705	371.028
41.341	130.34	41.0055	52.45	41.251	79	36.0035	426.83	36.0035	358.67
41.374	123.15	41.0385	48.39	41.284	86	36.0365	472.651	36.0365	390.026
41.407	100.09	41.0715	48.86	41.317	97	36.0695	473.522	36.0695	339.59
41.44	85.12	41.1045	54.09	41.35	101	36.1025	503.727	36.1025	363.728
41.473	96.32	41.1375	52.14	41.383	74	36.1355	503.271	36.1355	382.018
41.506	100.07	41.1705	43	41.416	83	36.1685	528.227	36.1685	393.672
41.539	100.61	41.2035	39.29	41.449	80	36.2015	505.28	36.2015	390.803
41.572	94.17	41.2365	44.06	41.482	71	36.2345	546.646	36.2345	421.385
41.605	98.24	41.2695	45.42	41.515	87	36.2675	563.248	36.2675	383.943
41.638	105.67	41.3025	49	41.548	90	36.3005	606.94	36.3005	417.03
41.671	87.05	41.3355	49.94	41.581	74	36.3335	603.061	36.3335	419.127
41.704	96.92	41.3685	49.77	41.614	79	36.3665	627.745	36.3665	470.47
41.737	107.78	41.4015	45.5	41.647	94	36.3995	696.402	36.3995	426.05
41.77	105.1	41.4345	45.92	41.68	97	36.4325	686.426	36.4325	477.084
41.803	123.13	41.4675	46.7	41.713	59	36.4655	804.985	36.4655	457.107
41.836	86.33	41.5005	43.82	41.746	78	36.4985	842.934	36.4985	467.271
41.869	94.22	41.5335	41.17	41.779	87	36.5315	877.431	36.5315	468
41.902	106.91	41.5665	51.37	41.812	104	36.5645	932.095	36.5645	472.57
41.935	97.15	41.5995	50.79	41.845	73	36.5975	949.618	36.5975	474.803
41.968	80.85	41.6325	50.65	41.878	84	36.6305	1018.54	36.6305	454.561
42.001	91.3	41.6655	41.36	41.911	89	36.6635	1036.64	36.6635	431.851
42.034	105.99	41.6985	40.87	41.944	71	36.6965	1060.45	36.6965	457.492
42.067	90.08	41.7315	44.23	41.977	73	36.7295	1104.84	36.7295	446.687
42.1	84.48	41.7645	45.14	42.01	68	36.7625	1073.45	36.7625	446.514
42.133	93.94	41.7975	33.49	42.043	82	36.7955	1089.94	36.7955	432.142
42.166	91.11	41.8305	44.15	42.076	84	36.8285	1032.41	36.8285	400.551
42.199	96.42	41.8635	44.64	42.109	76	36.8615	1022	36.8615	393.2
42.232	87.73	41.8965	44.63	42.142	88	36.8945	992.286	36.8945	411.113
42.265	79.56	41.9295	36.64	42.175	83	36.9275	970.052	36.9275	374.156
42.298	95.59	41.9625	44.22	42.208	81	36.9605	957.615	36.9605	342.944
42.331	101.75	41.9955	41.97	42.241	73	36.9935	898.78	36.9935	348.244
42.364	102	42.0285	41.89	42.274	79	37.0265	855.68	37.0265	364.528
42.397	92.55	42.0615	45.11	42.307	87	37.0595	850.622	37.0595	379.14
42.43	99.71	42.0945	44.16	42.34	80	37.0925	835.631	37.0925	361.65
42.463	99.09	42.1275	37.94	42.373	84	37.1255	852.767	37.1255	353
42.496	102.51	42.1605	42.3	42.406	90	37.1585	856.136	37.1585	339.959
42.529	90.12	42.1935	39.59	42.439	84	37.1915	805.164	37.1915	347.475
42.562	88.97	42.2265	45.81	42.472	76	37.2245	765.472	37.2245	328.878
42.595	84.19	42.2595	41.73	42.505	74	37.2575	734.304	37.2575	302.382
42.628	79.36	42.2925	51.82	42.538	78	37.2905	737.26	37.2905	293.093
42.661	79.63	42.3255	43.45	42.571	69	37.3235	749.739	37.3235	285.145
42.694	100.84	42.3585	44.04	42.604	69	37.3565	702.546	37.3565	295.653
42.727	86.98	42.3915	44.75	42.637	77	37.3895	657.846	37.3895	312.773
42.76	77.23	42.4245	40.62	42.67	77	37.4225	627.346	37.4225	316.244
42.793	76.1	42.4575	42.78	42.703	75	37.4555	622.307	37.4555	294.959
42.826	75.5	42.4905	43.36	42.736	77	37.4885	580.163	37.4885	281.68
42.859	84.5	42.5235	41.24	42.769	85	37.5215	558.515	37.5215	289.568
42.892	85.24	42.5565	38.52	42.802	84	37.5545	525.948	37.5545	299.812
42.925	85.67	42.5895	40.84	42.835	91	37.5875	501.705	37.5875	297.735
42.958	81.32	42.6225	43.95	42.868	90	37.6205	477.267	37.6205	288.944
42.991	81.99	42.6555	40.1	42.901	74	37.6535	444.464	37.6535	273.084
43.024	82.21	42.6885	43.77	42.934	82	37.6865	432.088	37.6865	274.039
43.057	79.21	42.7215	39.17	42.967	93	37.7195	395.555	37.7195	290.414
43.09	87.31	42.7545	42.79	43	81	37.7525	398.942	37.7525	278.694
43.123	98.53	42.7875	41.65	43.033	74	37.7855	416.184	37.7855	265.231
43.156	97.23	42.8205	40.41	43.066	79	37.8185	414.405	37.8185	266.699
43.189	82.85	42.8535	35.24	43.099	85	37.8515	414.11	37.8515	246.059
43.222	87.7	42.8865	45.01	43.132	87	37.8845	395.817	37.8845	240.821
43.255	89.42	42.9195	43.39	43.165	78	37.9175	393.044	37.9175	252.801
43.288	80.15	42.9525	42.05	43.198	75	37.9505	375.511	37.9505	241.085
43.321	76.24	42.9855	43.58	43.231	68	37.9835	369.591	37.9835	249.224
43.354	81.8	43.0185	38.54	43.264	67	38.0165	373.831	38.0165	230.446
43.387	87.09	43.0515	38.66	43.297	71	38.0495	338.169	38.0495	249.965
43.42	89.66	43.0845	39.43	43.33	84	38.0825	336.978	38.0825	242.681
43.453	85.39	43.1175	42.17	43.363	86	38.1155	360.355	38.1155	225.924
43.486	83.24	43.1505	42.85	43.396	88	38.1485	382.45	38.1485	214.843
43.519	86	43.1835	38.62	43.429	90	38.1815	392.583	38.1815	214.288
43.552	84.58	43.2165	38.55	43.462	89	38.2145	383.973	38.2145	201.027
43.585	80.18	43.2495	43.48	43.495	76	38.2475	387.923	38.2475	203.268
43.618	80.85	43.2825	43.79	43.528	66	38.2805	381.921	38.2805	230.697
43.651	93.19	43.3155	41.74	43.561	68	38.3135	366.658	38.3135	237.877
43.684	102.03	43.3485	38.34	43.594	70	38.3465	350.7	38.3465	191.463
43.717	87.23	43.3815	37.01	43.627	80	38.3795	363.437	38.3795	195.842
43.75	83.71	43.4145	40.06	43.66	82	38.4125	361.086	38.4125	201.674
43.783	93.02	43.4475	41.08	43.693	73	38.4455	348.513	38.4455	185
43.816	87.53	43.4805	39.17	43.726	85	38.4785	359	38.4785	186.807
43.849	81.51	43.5135	39.38	43.759	91	38.5115	353.958	38.5115	197.185
43.882	86.84	43.5465	39.75	43.792	83	38.5445	329	38.5445	209.243
43.915	97.64	43.5795	39.85	43.825	75	38.5775	330.285	38.5775	210.86
43.948	74.26	43.6125	38.52	43.858	87	38.6105	343.596	38.6105	181.431
43.981	89.12	43.6455	35.7	43.891	73	38.6435	373.246	38.6435	189.943
44.014	90.75	43.6785	38.46	43.924	57	38.6765	314.895	38.6765	180.532
44.047	97.38	43.7115	38.58	43.957	77	38.7095	316.951	38.7095	171.965
44.08	98.62	43.7445	36.98	43.99	69	38.7425	346.398	38.7425	207.181
44.113	73.67	43.7775	38.08	44.023	84	38.7755	350.063	38.7755	165.141
44.146	96.11	43.8105	34.06	44.056	73	38.8085	336.24	38.8085	194.349
44.179	98.18	43.8435	35.74	44.089	93	38.8415	323.5	38.8415	183.291
44.212	101.78	43.8765	35.64	44.122	81	38.8745	334.652	38.8745	189.13
44.245	95.06	43.9095	34.67	44.155	68	38.9075	322.313	38.9075	160.147
44.278	98.01	43.9425	35.47	44.188	69	38.9405	281.122	38.9405	168.955
44.311	99.99	43.9755	38.08	44.221	79	38.9735	313.705	38.9735	157.107
44.344	91.17	44.0085	42.61	44.254	75	39.0065	297.367	39.0065	193.202
44.377	69.7	44.0415	38.83	44.287	85	39.0395	294.103	39.0395	173.719
44.41	79.51	44.0745	34.3	44.32	85	39.0725	308.297	39.0725	186.344
44.443	85.66	44.1075	39.84	44.353	83	39.1055	286.428	39.1055	159.726
44.476	90.65	44.1405	41.78	44.386	81	39.1385	289.639	39.1385	171.918
44.509	79.07	44.1735	43.59	44.419	81	39.1715	279.017	39.1715	151.035
44.542	99.72	44.2065	41.07	44.452	92	39.2045	303.272	39.2045	170.662
44.575	91.29	44.2395	46.67	44.485	76	39.2375	308.67	39.2375	148.082
44.608	93.52	44.2725	41.24	44.518	82	39.2705	268.645	39.2705	162.546
44.641	101.8	44.3055	42.14	44.551	80	39.3035	274.24	39.3035	171.053
44.674	88.47	44.3385	40.98	44.584	86	39.3365	291.336	39.3365	175.408
44.707	100.31	44.3715	40.03	44.617	98	39.3695	264.622	39.3695	165.928
44.74	94.71	44.4045	41.24	44.65	83	39.4025	268.921	39.4025	173.094
44.773	75.85	44.4375	35.91	44.683	86	39.4355	273.442	39.4355	169.301
44.806	94.51	44.4705	39.06	44.716	74	39.4685	272.397	39.4685	169.603
44.839	91.3	44.5035	39.04	44.749	75	39.5015	276.733	39.5015	173.944
44.872	76.54	44.5365	44.93	44.782	81	39.5345	258.596	39.5345	164.91
44.905	76.83	44.5695	39.61	44.815	96	39.5675	247.655	39.5675	170.399
44.938	90.05	44.6025	33.89	44.848	89	39.6005	238.491	39.6005	160.986
44.971	92.52	44.6355	37.05	44.881	86	39.6335	232.309	39.6335	177.67
45.004	94.18	44.6685	36.6	44.914	84	39.6665	245.512	39.6665	174.842
45.037	98.58	44.7015	39.79	44.947	82	39.6995	252.426	39.6995	166.009
45.07	92.97	44.7345	37.77	44.98	79	39.7325	225.689	39.7325	145.092
45.103	92.07	44.7675	47.1	45.013	84	39.7655	233.942	39.7655	150.065
45.136	98.42	44.8005	39.9	45.046	83	39.7985	232.875	39.7985	157.35
45.169	108.31	44.8335	39.9	45.079	75	39.8315	241.91	39.8315	158
45.202	98.3	44.8665	48.15	45.112	73	39.8645	256.797	39.8645	166.446
45.235	88.44	44.8995	46.94	45.145	75	39.8975	256.54	39.8975	176.097
45.268	89.51	44.9325	41.54	45.178	70	39.9305	228.398	39.9305	186.493
45.301	98.99	44.9655	47.91	45.211	83	39.9635	214.224	39.9635	181.823
45.334	110.62	44.9985	47	45.244	75	39.9965	219.194	39.9965	164.616
45.367	100.86	45.0315	40.79	45.277	76	40.0295	222.587	40.0295	168.144
45.4	96.19	45.0645	43.74	45.31	97	40.0625	231.034	40.0625	170.835
45.433	100	45.0975	48.79	45.343	104	40.0955	229.704	40.0955	164.755
45.466	104.41	45.1305	51.82	45.376	104	40.1285	213.577	40.1285	174.52
45.499	115	45.1635	45.46	45.409	99	40.1615	215.719	40.1615	180.784
45.532	128.89	45.1965	46.85	45.442	111	40.1945	230.756	40.1945	179.57
45.565	129.84	45.2295	51.68	45.475	119	40.2275	240.596	40.2275	163.638
45.598	143.52	45.2625	53.08	45.508	109	40.2605	217.111	40.2605	158.952
45.631	166.42	45.2955	52.34	45.541	112	40.2935	203.076	40.2935	166.146
45.664	176.18	45.3285	46.23	45.574	125	40.3265	232.655	40.3265	165.727
45.697	197.8	45.3615	44.52	45.607	135	40.3595	247.16	40.3595	155.817
45.73	243.8	45.3945	51	45.64	137	40.3925	236.946	40.3925	143.817
45.763	308.3	45.4275	50.16	45.673	140	40.4255	225.696	40.4255	154.044
45.796	381.67	45.4605	57.8	45.706	150	40.4585	226.533	40.4585	171.931
45.829	474.09	45.4935	65.22	45.739	176	40.4915	225.086	40.4915	191.41
45.862	537	45.5265	67.62	45.772	203	40.5245	231.494	40.5245	184.062
45.895	528.88	45.5595	69.66	45.805	233	40.5575	237.783	40.5575	163.931
45.928	498.42	45.5925	75.77	45.838	278	40.5905	222.06	40.5905	171.809
45.961	466.47	45.6255	86.52	45.871	313	40.6235	227.18	40.6235	194.796
45.994	440.37	45.6585	106.22	45.904	332	40.6565	215	40.6565	171.268
46.027	398.66	45.6915	120.51	45.937	366	40.6895	220.339	40.6895	169.001
46.06	370.44	45.7245	137.39	45.97	408	40.7225	230.037	40.7225	178.384
46.093	315.76	45.7575	172.36	46.003	419	40.7555	228	40.7555	187.832
46.126	306.74	45.7905	225.33	46.036	371	40.7885	232.436	40.7885	171.043
46.159	297.71	45.8235	269.86	46.069	352	40.8215	243.566	40.8215	174.475
46.192	333.29	45.8565	301.79	46.102	328	40.8545	246.082	40.8545	202.893
46.225	396.25	45.8895	318.35	46.135	334	40.8875	251.32	40.8875	202.07
46.258	436.04	45.9225	325.49	46.168	326	40.9205	259.471	40.9205	188.678
46.291	504.41	45.9555	326.52	46.201	342	40.9535	257.257	40.9535	201.86
46.324	517.45	45.9885	315.87	46.234	328	40.9865	242.696	40.9865	205.581
46.357	558.96	46.0215	300.79	46.267	328	41.0195	273.316	41.0195	200.523
46.39	599.27	46.0545	291.03	46.3	315	41.0525	284.832	41.0525	214
46.423	588.12	46.0875	284.45	46.333	332	41.0855	273.267	41.0855	215.092
46.456	615.41	46.1205	289.48	46.366	315	41.1185	248.418	41.1185	216.614
46.489	565.72	46.1535	302.81	46.399	306	41.1515	276.723	41.1515	204.857
46.522	517.75	46.1865	322.51	46.432	274	41.1845	288.305	41.1845	230.856
46.555	485.77	46.2195	329.03	46.465	285	41.2175	299.635	41.2175	231.708
46.588	428.57	46.2525	326.36	46.498	270	41.2505	286.137	41.2505	241.456
46.621	351.15	46.2855	334.66	46.531	252	41.2835	301.363	41.2835	230
46.654	330.43	46.3185	325.34	46.564	241	41.3165	300.299	41.3165	228.692
46.687	276.58	46.3515	292.56	46.597	246	41.3495	336.827	41.3495	217.131
46.72	259.23	46.3845	257.18	46.63	252	41.3825	279.704	41.3825	230.409
46.753	235.42	46.4175	248.1	46.663	263	41.4155	304.555	41.4155	234.889
46.786	225.09	46.4505	227.53	46.696	251	41.4485	330.314	41.4485	215.914
46.819	205.71	46.4835	198.57	46.729	239	41.4815	314.909	41.4815	214.424
46.852	196.01	46.5165	180.95	46.762	292	41.5145	311.26	41.5145	227.947
46.885	148.12	46.5495	165.77	46.795	283	41.5475	270.149	41.5475	224.901
46.918	163.92	46.5825	147.17	46.828	243	41.5805	299.77	41.5805	205.154
46.951	178.73	46.6155	153.21	46.861	256	41.6135	314.695	41.6135	202.061
46.984	159.61	46.6485	154.84	46.894	220	41.6465	318.868	41.6465	213.604
47.017	139.86	46.6815	149.69	46.927	158	41.6795	290.368	41.6795	211.137
47.05	177.72	46.7145	141.61	46.96	180	41.7125	297.476	41.7125	185.573
47.083	145.53	46.7475	131.55	46.993	179	41.7455	270.127	41.7455	182.142
47.116	124.62	46.7805	122.24	47.026	162	41.7785	272.582	41.7785	190.248
47.149	141.13	46.8135	115.25	47.059	144	41.8115	242.27	41.8115	170.212
47.182	133.17	46.8465	92.07	47.092	162	41.8445	258.606	41.8445	183.15
47.215	134.64	46.8795	83.49	47.125	161	41.8775	253.972	41.8775	171.822
47.248	135.87	46.9125	92.81	47.158	150	41.9105	253.866	41.9105	170
47.281	117.17	46.9455	92.97	47.191	144	41.9435	253.147	41.9435	177.679
47.314	122.43	46.9785	78.27	47.224	157	41.9765	247.956	41.9765	169.753
47.347	115.7	47.0115	69.19	47.257	162	42.0095	226.301	42.0095	177.936
47.38	117.27	47.0445	66.74	47.29	148	42.0425	255.429	42.0425	183.261
47.413	97.87	47.0775	57.42	47.323	152	42.0755	242.933	42.0755	182.395
47.446	88.24	47.1105	64.83	47.356	167	42.1085	247.481	42.1085	162.249
47.479	90.9	47.1435	53.31	47.389	166	42.1415	250.777	42.1415	152.336
47.512	93.53	47.1765	56.1	47.422	167	42.1745	243.352	42.1745	147.176
47.545	101.55	47.2095	49.32	47.455	152	42.2075	247.769	42.2075	149.761
47.578	110.68	47.2425	70.87	47.488	150	42.2405	222.639	42.2405	152.479
47.611	101.33	47.2755	58.98	47.521	150	42.2735	203.551	42.2735	150.093
47.644	93.42	47.3085	50.7	47.554	144	42.3065	222.854	42.3065	158.285
47.677	84.26	47.3415	49.91	47.587	118	42.3395	239.016	42.3395	136.744
47.71	100.36	47.3745	55.93	47.62	154	42.3725	219.266	42.3725	148.045
47.743	112.39	47.4075	52.8	47.653	163	42.4055	215.763	42.4055	171.525
47.776	102.01	47.4405	47.62	47.686	145	42.4385	210.373	42.4385	172.027
47.809	92.08	47.4735	45.88	47.719	138	42.4715	202.745	42.4715	161.839
47.842	91.92	47.5065	45.51	47.752	146	42.5045	212.49	42.5045	154.17
47.875	99.28	47.5395	47.85	47.785	150	42.5375	200.229	42.5375	144.492
47.908	111	47.5725	48.28	47.818	136	42.5705	214.748	42.5705	145.518
47.941	99.72	47.6055	44.71	47.851	130	42.6035	219.592	42.6035	150.201
47.974	90.18	47.6385	45.42	47.884	148	42.6365	197.306	42.6365	145.71
48.007	106.02	47.6715	38.83	47.917	143	42.6695	180.674	42.6695	169.031
48.04	128.3	47.7045	40.97	47.95	132	42.7025	196.812	42.7025	155.813
48.073	126.51	47.7375	41.92	47.983	147	42.7355	203.653	42.7355	133.849
48.106	122.32	47.7705	50.52	48.016	146	42.7685	197.074	42.7685	142.909
48.139	126	47.8035	50	48.049	137	42.8015	202.721	42.8015	148.525
48.172	131.14	47.8365	52.06	48.082	134	42.8345	208.024	42.8345	134.154
48.205	130.48	47.8695	64.73	48.115	134	42.8675	195.02	42.8675	135.977
48.238	131.36	47.9025	56.02	48.148	146	42.9005	186.353	42.9005	152.487
48.271	141.81	47.9355	56.94	48.181	150	42.9335	183.942	42.9335	152.052
48.304	139.51	47.9685	49.14	48.214	145	42.9665	181.459	42.9665	153.307
48.337	133.35	48.0015	51	48.247	134	42.9995	196.179	42.9995	151.962
48.37	132.37	48.0345	56.18	48.28	130	43.0325	202.82	43.0325	150.052
48.403	137.52	48.0675	62.43	48.313	145	43.0655	191.955	43.0655	150.613
48.436	151.07	48.1005	67.43	48.346	152	43.0985	186.34	43.0985	147.232
48.469	149.19	48.1335	73.71	48.379	155	43.1315	200.768	43.1315	144.62
48.502	141.61	48.1665	68.31	48.412	160	43.1645	201.748	43.1645	139.542
48.535	143.25	48.1995	57.3	48.445	170	43.1975	195.203	43.1975	132.679
48.568	146.64	48.2325	58.75	48.478	154	43.2305	202.516	43.2305	123.844
48.601	140.05	48.2655	63.99	48.511	148	43.2635	191	43.2635	136.695
48.634	134.4	48.2985	67.55	48.544	171	43.2965	188.321	43.2965	145.033
48.667	139.8	48.3315	62.87	48.577	148	43.3295	183.967	43.3295	148.687
48.7	126.5	48.3645	60.07	48.61	155	43.3625	188.167	43.3625	131.025
48.733	124.29	48.3975	61.52	48.643	159	43.3955	194.188	43.3955	138.515
48.766	136.3	48.4305	64.24	48.676	141	43.4285	192.735	43.4285	140.971
48.799	140.69	48.4635	63.97	48.709	148	43.4615	176.566	43.4615	150.294
48.832	125.05	48.4965	67.35	48.742	167	43.4945	169.254	43.4945	137.85
48.865	131.24	48.5295	65.08	48.775	173	43.5275	183.1	43.5275	141.811
48.898	142.42	48.5625	69.38	48.808	192	43.5605	171.351	43.5605	127.831
48.931	140.29	48.5955	69.01	48.841	204	43.5935	196.693	43.5935	128.644
48.964	121.01	48.6285	70.14	48.874	242	43.6265	178.834	43.6265	138.953
48.997	140.96	48.6615	81.89	48.907	284	43.6595	182.588	43.6595	117.959
49.03	162.11	48.6945	88.58	48.94	260	43.6925	180.969	43.6925	129.481
49.063	170.81	48.7275	95.06	48.973	271	43.7255	164.365	43.7255	143.635
49.096	193.97	48.7605	101.99	49.006	254	43.7585	173.369	43.7585	140.475
49.129	218.82	48.7935	108.95	49.039	272	43.7915	189.051	43.7915	157.547
49.162	234.57	48.8265	117.57	49.072	318	43.8245	205.408	43.8245	146.48
49.195	390.03	48.8595	118.85	49.105	297	43.8575	193.92	43.8575	130.84
49.228	490.1	48.8925	120.09	49.138	319	43.8905	185.248	43.8905	136.893
49.261	680.54	48.9255	130.88	49.171	377	43.9235	178.621	43.9235	135.242
49.294	868.77	48.9585	148.01	49.204	413	43.9565	175.575	43.9565	130.38
49.327	931.28	48.9915	171.69	49.237	487	43.9895	183.805	43.9895	154.986
49.36	785.05	49.0245	204.59	49.27	439	44.0225	207.886	44.0225	127.716
49.393	655.5	49.0575	241.33	49.303	425	44.0555	206.353	44.0555	124.015
49.426	583.12	49.0905	284.45	49.336	384	44.0885	213.244	44.0885	145.275
49.459	555.24	49.1235	359.91	49.369	356	44.1215	189.717	44.1215	123.226
49.492	427.98	49.1565	426.47	49.402	303	44.1545	175.037	44.1545	135.019
49.525	312.46	49.1895	435.93	49.435	279	44.1875	180.962	44.1875	137.981
49.558	227.42	49.2225	427.71	49.468	187	44.2205	176.095	44.2205	149.771
49.591	195.9	49.2555	387.77	49.501	181	44.2535	189.556	44.2535	135.476
49.624	189.25	49.2885	343.4	49.534	162	44.2865	189.044	44.2865	132.133
49.657	149.29	49.3215	289.12	49.567	139	44.3195	181.456	44.3195	151.803
49.69	142.34	49.3545	248.66	49.6	127	44.3525	194.025	44.3525	135.323
49.723	129.12	49.3875	205.26	49.633	120	44.3855	195.918	44.3855	134.918
49.756	128.91	49.4205	160.18	49.666	112	44.4185	205.051	44.4185	129.569
49.789	123.63	49.4535	130.06	49.699	108	44.4515	189.044	44.4515	141.494
49.822	126.53	49.4865	108.91	49.732	107	44.4845	180.841	44.4845	130.683
49.855	127	49.5195	90.52	49.765	111	44.5175	166.125	44.5175	117.727
49.888	116.72	49.5525	72.82	49.798	108	44.5505	170.836	44.5505	133.945
49.921	137.8	49.5855	70.18	49.831	119	44.5835	174.526	44.5835	135.316
49.954	122.04	49.6185	65.65	49.864	113	44.6165	187.438	44.6165	149.926
49.987	126.19	49.6515	71.32	49.897	111	44.6495	178.568	44.6495	130.135
50.02	118.32	49.6845	66.32	49.93	105	44.6825	170.372	44.6825	135.451
50.053	107.27	49.7175	63.43	49.963	106	44.7155	165.835	44.7155	134.835
50.086	113.59	49.7505	65.96	49.996	93	44.7485	200.819	44.7485	136.336
50.119	109.85	49.7835	61.19	50.029	87	44.7815	181.891	44.7815	146.958
50.152	108.76	49.8165	57.82	50.062	98	44.8145	182.041	44.8145	140.206
50.185	97.85	49.8495	62.2	50.095	103	44.8475	191.667	44.8475	145.148
50.218	99.84	49.8825	61.13	50.128	95	44.8805	196.912	44.8805	124.701
50.251	114.92	49.9155	64.53	50.161	84	44.9135	200.146	44.9135	126.732
50.284	106.6	49.9485	60.66	50.194	89	44.9465	186.944	44.9465	139.434
50.317	92.69	49.9815	73.02	50.227	105	44.9795	187.212	44.9795	126.436
50.35	105.32	50.0145	67.09	50.26	99	45.0125	191.355	45.0125	122.388
50.383	109	50.0475	56.38	50.293	100	45.0455	191.335	45.0455	138.627
50.416	117.48	50.0805	60.14	50.326	102	45.0785	189.696	45.0785	145.348
50.449	110.16	50.1135	53.74	50.359	92	45.1115	185.162	45.1115	124.533
50.482	99.22	50.1465	58.59	50.392	94	45.1445	171.715	45.1445	133.063
50.515	109.34	50.1795	58.8	50.425	101	45.1775	171.143	45.1775	137.014
50.548	100.69	50.2125	61.42	50.458	115	45.2105	205.084	45.2105	143.432
50.581	98.87	50.2455	59.34	50.491	116	45.2435	210.274	45.2435	138.041
50.614	108.47	50.2785	59.47	50.524	109	45.2765	198.847	45.2765	130.729
50.647	95.71	50.3115	60.44	50.557	109	45.3095	199.127	45.3095	134.255
50.68	92.86	50.3445	62.41	50.59	116	45.3425	195.591	45.3425	139.307
50.713	96.75	50.3775	55.94	50.623	111	45.3755	185	45.3755	132.308
50.746	94.53	50.4105	64.56	50.656	106	45.4085	186.361	45.4085	124
50.779	97.58	50.4435	62.89	50.689	111	45.4415	199.671	45.4415	138.369
50.812	106.54	50.4765	61.43	50.722	109	45.4745	199.493	45.4745	141.989
50.845	109.08	50.5095	60.96	50.755	111	45.5075	190.073	45.5075	136.391
50.878	103.09	50.5425	65.99	50.788	124	45.5405	189.851	45.5405	144.802
50.911	108.91	50.5755	61.91	50.821	130	45.5735	182.36	45.5735	150.85
50.944	115.29	50.6085	70.96	50.854	122	45.6065	175.4	45.6065	144.451
50.977	127.39	50.6415	67.38	50.887	113	45.6395	188.997	45.6395	133.125
51.01	139.31	50.6745	67.57	50.92	123	45.6725	194.603	45.6725	136.247
51.043	138.12	50.7075	63.04	50.953	135	45.7055	203.185	45.7055	140.352
51.076	152.21	50.7405	64.84	50.986	127	45.7385	193.643	45.7385	141.195
51.109	162.17	50.7735	59.1	51.019	131	45.7715	163.376	45.7715	147.547
51.142	178.39	50.8065	61.3	51.052	137	45.8045	187.489	45.8045	147.381
51.175	185.09	50.8395	73.79	51.085	124	45.8375	194.277	45.8375	135.048
51.208	176.46	50.8725	74.11	51.118	136	45.8705	185.675	45.8705	127.279
51.241	165.47	50.9055	77.95	51.151	129	45.9035	172.672	45.9035	139
51.274	176.13	50.9385	83.61	51.184	137	45.9365	174.647	45.9365	131.235
51.307	162.43	50.9715	82.35	51.217	133	45.9695	182.218	45.9695	128.369
51.34	155.69	51.0045	87.25	51.25	122	46.0025	197.491	46.0025	152.631
51.373	150.31	51.0375	83.43	51.283	117	46.0355	199.286	46.0355	146.855
51.406	152.42	51.0705	91.89	51.316	117	46.0685	198.822	46.0685	157.449
51.439	141.69	51.1035	91.74	51.349	120	46.1015	205.876	46.1015	140.521
51.472	139	51.1365	86.36	51.382	127	46.1345	190.312	46.1345	135.808
51.505	141.29	51.1695	87.4	51.415	115	46.1675	176.346	46.1675	121.466
51.538	138.33	51.2025	85.52	51.448	119	46.2005	192.33	46.2005	138.446
51.571	136	51.2355	83.08	51.481	119	46.2335	184.39	46.2335	143.224
51.604	133.4	51.2685	85.19	51.514	115	46.2665	213.437	46.2665	128.014
51.637	124.12	51.3015	85.51	51.547	115	46.2995	208.35	46.2995	125.291
51.67	124.99	51.3345	84	51.58	101	46.3325	226.845	46.3325	131.859
51.703	116.03	51.3675	84.52	51.613	125	46.3655	202.955	46.3655	137.592
51.736	163.68	51.4005	87.55	51.646	107	46.3985	208.733	46.3985	147.026
51.769	140.77	51.4335	86.24	51.679	120	46.4315	208.983	46.4315	150.188
51.802	150.51	51.4665	76.59	51.712	102	46.4645	190.518	46.4645	136.487
51.835	141.44	51.4995	79.23	51.745	103	46.4975	241.416	46.4975	168.348
51.868	152.51	51.5325	92.15	51.778	108	46.5305	214.304	46.5305	162.328
51.901	148.26	51.5655	95.11	51.811	121	46.5635	234.083	46.5635	156.417
51.934	151.95	51.5985	92.95	51.844	127	46.5965	213.141	46.5965	159.233
51.967	164.06	51.6315	87.23	51.877	118	46.6295	213.897	46.6295	136.639
52	164.09	51.6645	84.55	51.91	118	46.6625	197.226	46.6625	147.681
52.033	145.96	51.6975	86.34	51.943	107	46.6955	223.852	46.6955	161.508
52.066	145.11	51.7305	82.89	51.976	97	46.7285	248.658	46.7285	146.819
52.099	150.15	51.7635	84.58	52.009	118	46.7615	232.112	46.7615	138.135
52.132	164.96	51.7965	82.75	52.042	123	46.7945	246.923	46.7945	155.907
52.165	158.11	51.8295	80.99	52.075	117	46.8275	266.644	46.8275	143.231
52.198	180.36	51.8625	83.29	52.108	119	46.8605	279.604	46.8605	143
52.231	178.12	51.8955	81.76	52.141	116	46.8935	272.345	46.8935	135.345
52.264	179.89	51.9285	83.13	52.174	118	46.9265	281.443	46.9265	123.669
52.297	181.87	51.9615	80.39	52.207	126	46.9595	299.701	46.9595	157.47
52.33	215.17	51.9945	81.21	52.24	134	46.9925	280.782	46.9925	151.729
52.363	255.26	52.0275	86.25	52.273	132	47.0255	303.471	47.0255	167.314
52.396	259	52.0605	81.3	52.306	160	47.0585	358.728	47.0585	160.957
52.429	296.11	52.0935	78.05	52.339	153	47.0915	350.903	47.0915	158.238
52.462	303.61	52.1265	77.84	52.372	163	47.1245	362.895	47.1245	163.21
52.495	322.02	52.1595	80.43	52.405	182	47.1575	382.971	47.1575	138.327
52.528	353.75	52.1925	91.64	52.438	170	47.1905	375.882	47.1905	155.921
52.561	347.34	52.2255	76.73	52.471	189	47.2235	361.543	47.2235	170.796
52.594	331.87	52.2585	88.73	52.504	215	47.2565	379.446	47.2565	170.546
52.627	357.27	52.2915	103.79	52.537	199	47.2895	404.13	47.2895	158.727
52.66	319.48	52.3245	105.35	52.57	205	47.3225	428.022	47.3225	136.186
52.693	311.13	52.3575	110.55	52.603	206	47.3555	390.884	47.3555	162.197
52.726	308.15	52.3905	133.59	52.636	206	47.3885	397.415	47.3885	152.585
52.759	275.2	52.4235	144.24	52.669	214	47.4215	393.19	47.4215	140.963
52.792	278.4	52.4565	134.33	52.702	225	47.4545	402.614	47.4545	162.002
52.825	288.85	52.4895	142.36	52.735	205	47.4875	407.729	47.4875	172.188
52.858	275.18	52.5225	146.44	52.768	194	47.5205	405.133	47.5205	155.799
52.891	257.69	52.5555	149.36	52.801	181	47.5535	394.143	47.5535	156.745
52.924	250.92	52.5885	156.16	52.834	175	47.5865	364.417	47.5865	151.703
52.957	234.33	52.6215	158.42	52.867	159	47.6195	348.249	47.6195	157.503
52.99	229.01	52.6545	147.02	52.9	171	47.6525	371.979	47.6525	144.014
53.023	218.85	52.6875	145.27	52.933	159	47.6855	366.702	47.6855	148.723
53.056	228.44	52.7205	140.48	52.966	167	47.7185	333.288	47.7185	157.282
53.089	239.52	52.7535	146.74	52.999	188	47.7515	321.256	47.7515	141.666
53.122	230.49	52.7865	150.32	53.032	163	47.7845	297.993	47.7845	144.311
53.155	212.5	52.8195	140.02	53.065	154	47.8175	281.794	47.8175	154.412
53.188	186.03	52.8525	140.91	53.098	159	47.8505	265.062	47.8505	160.132
53.221	197.37	52.8855	143.6	53.131	143	47.8835	272.485	47.8835	165.888
53.254	207.05	52.9185	148.25	53.164	145	47.9165	273.57	47.9165	166.305
53.287	192.12	52.9515	148.75	53.197	159	47.9495	277.809	47.9495	169.971
53.32	182.29	52.9845	139.9	53.23	144	47.9825	267.951	47.9825	183.715
53.353	204.89	53.0175	115.74	53.263	129	48.0155	244.729	48.0155	175.661
53.386	205.29	53.0505	124.75	53.296	145	48.0485	241.543	48.0485	147.625
53.419	195.09	53.0835	128.8	53.329	162	48.0815	249.523	48.0815	155.573
53.452	208.44	53.1165	127.42	53.362	165	48.1145	248.174	48.1145	166.217
53.485	207.21	53.1495	135.83	53.395	156	48.1475	250.007	48.1475	156.477
53.518	212.73	53.1825	117.27	53.428	144	48.1805	243.837	48.1805	155.145
53.551	217.29	53.2155	113.37	53.461	148	48.2135	228.512	48.2135	157.963
53.584	197.41	53.2485	110.24	53.494	158	48.2465	223.036	48.2465	159.614
53.617	188.28	53.2815	111.32	53.527	151	48.2795	218.371	48.2795	159.537
53.65	194	53.3145	125.57	53.56	156	48.3125	224.387	48.3125	155.014
53.683	208.92	53.3475	123.53	53.593	171	48.3455	218.205	48.3455	138.401
53.716	219.28	53.3805	124.63	53.626	163	48.3785	227.268	48.3785	143.656
53.749	206.67	53.4135	110.39	53.659	170	48.4115	230.246	48.4115	152.126
53.782	207.23	53.4465	108.09	53.692	179	48.4445	213.481	48.4445	165.244
53.815	192	53.4795	105.84	53.725	185	48.4775	205.853	48.4775	179.399
53.848	205.6	53.5125	101.14	53.758	181	48.5105	225.663	48.5105	167.313
53.881	226.76	53.5455	112.17	53.791	186	48.5435	223.051	48.5435	160.102
53.914	213.8	53.5785	108.5	53.824	205	48.5765	223.994	48.5765	154.809
53.947	199.94	53.6115	101.13	53.857	215	48.6095	231.106	48.6095	161
53.98	185.37	53.6445	100.75	53.89	212	48.6425	221.139	48.6425	165.877
54.013	205.15	53.6775	108.16	53.923	205	48.6755	221.468	48.6755	175.258
54.046	202.27	53.7105	112.91	53.956	210	48.7085	228.785	48.7085	165.384
54.079	174.56	53.7435	117.73	53.989	200	48.7415	229.257	48.7415	154.266
54.112	205.28	53.7765	124.09	54.022	184	48.7745	224.473	48.7745	144.182
54.145	200.29	53.8095	114.48	54.055	196	48.8075	228.46	48.8075	148.895
54.178	190.15	53.8425	110.71	54.088	205	48.8405	237.422	48.8405	149.046
54.211	180.77	53.8755	119.96	54.121	213	48.8735	234.041	48.8735	143.356
54.244	160.89	53.9085	120.82	54.154	202	48.9065	224.03	48.9065	167.786
54.277	172.69	53.9415	125.74	54.187	188	48.9395	261.423	48.9395	178.442
54.31	136.66	53.9745	127.48	54.22	188	48.9725	237.702	48.9725	172.925
54.343	173.14	54.0075	121.95	54.253	200	49.0055	271.792	49.0055	182.261
54.376	156.17	54.0405	124.96	54.286	193	49.0385	233.026	49.0385	177.595
54.409	151	54.0735	134.28	54.319	212	49.0715	218.533	49.0715	171.937
54.442	152.12	54.1065	145.35	54.352	206	49.1045	248.363	49.1045	154.505
54.475	158.61	54.1395	146.14	54.385	204	49.1375	232.445	49.1375	187.597
54.508	135	54.1725	141.17	54.418	215	49.1705	280.124	49.1705	154.9
54.541	114.67	54.2055	138.93	54.451	206	49.2035	247.561	49.2035	145.015
54.574	123.49	54.2385	140.28	54.484	189	49.2365	227.517	49.2365	170.466
54.607	130.85	54.2715	145.33	54.517	217	49.2695	205.213	49.2695	161.767
54.64	127.49	54.3045	140.03	54.55	169	49.3025	229.285	49.3025	157.136
54.673	114.31	54.3375	129.74	54.583	200	49.3355	208.957	49.3355	160.893
54.706	126.91	54.3705	130.05	54.616	212	49.3685	207.341	49.3685	156.166
54.739	119.01	54.4035	130.64	54.649	226	49.4015	245.848	49.4015	174.926
54.772	117.03	54.4365	114.82	54.682	227	49.4345	231.248	49.4345	178.934
54.805	96.56	54.4695	110.29	54.715	241	49.4675	219.35	49.4675	195.504
54.838	108.49	54.5025	111.29	54.748	254	49.5005	227.624	49.5005	182.586
54.871	108.05	54.5355	105.66	54.781	272	49.5335	219.49	49.5335	169.708
54.904	136.06	54.5685	93.23	54.814	276	49.5665	236.725	49.5665	167.134
54.937	129.7	54.6015	89.9	54.847	312	49.5995	229.718	49.5995	179.883
54.97	138.1	54.6345	101.49	54.88	315	49.6325	205.402	49.6325	190.076
55.003	177.59	54.6675	106.49	54.913	329	49.6655	212.845	49.6655	177.576
55.036	197.93	54.7005	96.85	54.946	339	49.6985	228.999	49.6985	187.47
55.069	211.34	54.7335	97.39	54.979	366	49.7315	226.652	49.7315	181.173
55.102	262.85	54.7665	108.5	55.012	353	49.7645	232.856	49.7645	187.713
55.135	319.27	54.7995	119.06	55.045	357	49.7975	238.222	49.7975	180.556
55.168	349.69	54.8325	121.48	55.078	353	49.8305	233.178	49.8305	189.813
55.201	411.51	54.8655	132.99	55.111	384	49.8635	223.809	49.8635	184.628
55.234	458.79	54.8985	137.43	55.144	393	49.8965	235.71	49.8965	212.839
55.267	502.84	54.9315	143.88	55.177	396	49.9295	217.567	49.9295	185.072
55.3	483	54.9645	166.95	55.21	384	49.9625	229.186	49.9625	184.593
55.333	444.93	54.9975	197.22	55.243	370	49.9955	222.472	49.9955	196.991
55.366	426.9	55.0305	226.43	55.276	352	50.0285	221.268	50.0285	187.906
55.399	403.12	55.0635	256.69	55.309	328	50.0615	219.77	50.0615	169.135
55.432	359.34	55.0965	276.02	55.342	326	50.0945	202.196	50.0945	171.306
55.465	320.78	55.1295	285.38	55.375	291	50.1275	211.795	50.1275	167.538
55.498	298.26	55.1625	301.05	55.408	270	50.1605	227.875	50.1605	192.508
55.531	242.25	55.1955	301.76	55.441	260	50.1935	199.444	50.1935	193.61
55.564	219.32	55.2285	276.38	55.474	219	50.2265	199.961	50.2265	189
55.597	190.19	55.2615	239.05	55.507	209	50.2595	220.348	50.2595	170.313
55.63	175.34	55.2945	239.05	55.54	193	50.2925	219.798	50.2925	183.916
55.663	179.51	55.3275	203.92	55.573	176	50.3255	229.484	50.3255	179.305
55.696	176.94	55.3605	176.4	55.606	162	50.3585	216.857	50.3585	178.183
55.729	151.7	55.3935	153.09	55.639	160	50.3915	207.467	50.3915	177.449
55.762	133.15	55.4265	130.92	55.672	168	50.4245	198.729	50.4245	177.625
55.795	130.59	55.4595	109.77	55.705	169	50.4575	215.07	50.4575	182.958
55.828	133.33	55.4925	99.54	55.738	166	50.4905	222.316	50.4905	175.159
55.861	134.43	55.5255	98.39	55.771	167	50.5235	214.867	50.5235	178.193
55.894	137.89	55.5585	85.32	55.804	181	50.5565	220.643	50.5565	189.875
55.927	137.2	55.5915	93.13	55.837	185	50.5895	214.64	50.5895	201.115
55.96	145.68	55.6245	89.08	55.87	183	50.6225	205.528	50.6225	196.905
55.993	151.85	55.6575	81.37	55.903	175	50.6555	201.359	50.6555	204.018
56.026	157.61	55.6905	76.35	55.936	174	50.6885	214.607	50.6885	200.884
56.059	158.62	55.7235	75.6	55.969	178	50.7215	227.586	50.7215	192.299
56.092	156.24	55.7565	88.93	56.002	174	50.7545	220.133	50.7545	196.789
56.125	155.99	55.7895	84.51	56.035	160	50.7875	214.674	50.7875	187.674
56.158	154.37	55.8225	91.94	56.068	161	50.8205	212.905	50.8205	180.023
56.191	162.44	55.8555	91.53	56.101	171	50.8535	214.44	50.8535	182.797
56.224	182.77	55.8885	95.7	56.134	177	50.8865	209.446	50.8865	196.99
56.257	206.91	55.9215	98.35	56.167	180	50.9195	206.146	50.9195	205.975
56.29	235.95	55.9545	100.76	56.2	187	50.9525	205.168	50.9525	213.402
56.323	292.4	55.9875	94.93	56.233	213	50.9855	195.779	50.9855	206.993
56.356	318	56.0205	102.08	56.266	213	51.0185	201.143	51.0185	198.636
56.389	370.08	56.0535	114.34	56.299	234	51.0515	213.46	51.0515	200.088
56.422	422.98	56.0865	120.58	56.332	262	51.0845	213.162	51.0845	192.189
56.455	410.29	56.1195	136.13	56.365	253	51.1175	203.129	51.1175	200.887
56.488	420.14	56.1525	153.06	56.398	237	51.1505	221.608	51.1505	220.827
56.521	436.57	56.1855	157.75	56.431	232	51.1835	223.866	51.1835	207.567
56.554	399.75	56.2185	178.56	56.464	240	51.2165	217.902	51.2165	204.383
56.587	359.73	56.2515	205.74	56.497	224	51.2495	233.542	51.2495	197.356
56.62	333.66	56.2845	222.13	56.53	215	51.2825	258.735	51.2825	210.837
56.653	300.06	56.3175	231.38	56.563	188	51.3155	232.532	51.3155	198.308
56.686	256.89	56.3505	228.18	56.596	173	51.3485	225.004	51.3485	220.003
56.719	221	56.3835	209.88	56.629	180	51.3815	232.398	51.3815	225.348
56.752	197.68	56.4165	184.09	56.662	178	51.4145	206.875	51.4145	213.671
56.785	183.21	56.4495	169.94	56.695	145	51.4475	207.882	51.4475	239.995
56.818	186.63	56.4825	157.92	56.728	150	51.4805	239.575	51.4805	214
56.851	192.07	56.5155	144.75	56.761	148	51.5135	285.024	51.5135	218.675
56.884	174.71	56.5485	127.04	56.794	175	51.5465	245.477	51.5465	234.816
56.917	191.51	56.5815	106.83	56.827	151	51.5795	243	51.5795	220.66
56.95	190.97	56.6145	101.95	56.86	166	51.6125	244.193	51.6125	247.615
56.983	203.25	56.6475	104.61	56.893	182	51.6455	252.91	51.6455	232.636
57.016	205.7	56.6805	97.37	56.926	187	51.6785	259.801	51.6785	223.876
57.049	172.98	56.7135	94.22	56.959	197	51.7115	223.333	51.7115	228.112
57.082	205.41	56.7465	97.37	56.992	200	51.7445	227.97	51.7445	261.514
57.115	218	56.7795	89.68	57.025	238	51.7775	245.485	51.7775	197.464
57.148	216.41	56.8125	89.41	57.058	208	51.8105	240.586	51.8105	246.977
57.181	197.57	56.8455	95.55	57.091	223	51.8435	249.272	51.8435	270.486
57.214	207.61	56.8785	102.57	57.124	255	51.8765	268.952	51.8765	246.233
57.247	238.98	56.9115	107.13	57.157	274	51.9095	267.859	51.9095	231.423
57.28	263.07	56.9445	109.89	57.19	293	51.9425	264.725	51.9425	243.317
57.313	227.51	56.9775	108.69	57.223	276	51.9755	295.71	51.9755	256.73
57.346	267.99	57.0105	118.94	57.256	279	52.0085	267.077	52.0085	230.071
57.379	272.94	57.0435	130.94	57.289	270	52.0415	271.924	52.0415	284.159
57.412	288.59	57.0765	136.4	57.322	270	52.0745	262.279	52.0745	220.843
57.445	286.11	57.1095	144.61	57.355	274	52.1075	287.905	52.1075	246.823
57.478	262.27	57.1425	150.28	57.388	278	52.1405	331.605	52.1405	247.053
57.511	315.33	57.1755	154.19	57.421	286	52.1735	290.095	52.1735	257.276
57.544	302.37	57.2085	173.33	57.454	299	52.2065	289.765	52.2065	250.628
57.577	342.01	57.2415	175.72	57.487	284	52.2395	287.273	52.2395	249.091
57.61	328.92	57.2745	187.4	57.52	269	52.2725	340.773	52.2725	274.99
57.643	334.09	57.3075	188.2	57.553	321	52.3055	303.705	52.3055	279.767
57.676	327.14	57.3405	209.85	57.586	276	52.3385	305.838	52.3385	273.903
57.709	334.61	57.3735	212.91	57.619	279	52.3715	296.701	52.3715	272.142
57.742	311.4	57.4065	238.48	57.652	264	52.4045	338.128	52.4045	272
57.775	373.01	57.4395	231.23	57.685	274	52.4375	352.664	52.4375	293.658
57.808	362.96	57.4725	238.18	57.718	241	52.4705	354	52.4705	282.413
57.841	321.54	57.5055	268.63	57.751	235	52.5035	353.192	52.5035	284.654
57.874	328.95	57.5385	260.74	57.784	239	52.5365	376.852	52.5365	309.057
57.907	338.49	57.5715	272.97	57.817	257	52.5695	415.862	52.5695	283.703
57.94	323.01	57.6045	273.45	57.85	256	52.6025	436.547	52.6025	313.49
57.973	299.01	57.6375	256.35	57.883	270	52.6355	461.2	52.6355	332.572
58.006	301.96	57.6705	261.15	57.916	248	52.6685	443.431	52.6685	302.242
58.039	291.05	57.7035	257.44	57.949	255	52.7015	451.101	52.7015	326.13
58.072	293.22	57.7365	254.52	57.982	250	52.7345	491.523	52.7345	313.108
58.105	277.56	57.7695	241.78	58.015	247	52.7675	511.359	52.7675	329.144
58.138	271.39	57.8025	214.27	58.048	254	52.8005	536.206	52.8005	328.897
58.171	276.79	57.8355	216.77	58.081	260	52.8335	576.658	52.8335	345.802
58.204	267.59	57.8685	200.21	58.114	271	52.8665	570.94	52.8665	351.988
58.237	273.85	57.9015	205.04	58.147	235	52.8995	601.673	52.8995	369.68
58.27	265.14	57.9345	196.9	58.18	220	52.9325	630.72	52.9325	377.427
58.303	274.73	57.9675	168.38	58.213	246	52.9655	641.938	52.9655	392.399
58.336	278.79	58.0005	172.96	58.246	236	52.9985	673.814	52.9985	387.784
58.369	264.06	58.0335	169.31	58.279	242	53.0315	729.748	53.0315	394.136
58.402	250.45	58.0665	157.07	58.312	242	53.0645	773.377	53.0645	431.862
58.435	250.66	58.0995	167.92	58.345	230	53.0975	827.772	53.0975	436.496
58.468	256.28	58.1325	157.71	58.378	241	53.1305	896.024	53.1305	437.918
58.501	252.43	58.1655	149.62	58.411	262	53.1635	924.445	53.1635	447.555
58.534	272.51	58.1985	154.87	58.444	248	53.1965	953.281	53.1965	464.267
58.567	281.83	58.2315	169.93	58.477	239	53.2295	1013.48	53.2295	469.527
58.6	297.97	58.2645	166.85	58.51	255	53.2625	1040.86	53.2625	480.093
58.633	326.05	58.2975	167.36	58.543	254	53.2955	1035.99	53.2955	506.582
58.666	329.51	58.3305	180.34	58.576	255	53.3285	1057.62	53.3285	514.033
58.699	359.34	58.3635	184.47	58.609	263	53.3615	1113.09	53.3615	512.958
58.732	422.48	58.3965	192.35	58.642	291	53.3945	1154.06	53.3945	520.996
58.765	465.21	58.4295	212.96	58.675	310	53.4275	1144.21	53.4275	522.648
58.798	519.36	58.4625	224.55	58.708	310	53.4605	1130.18	53.4605	529.556
58.831	597.41	58.4955	242.96	58.741	310	53.4935	1116.58	53.4935	554.427
58.864	644.99	58.5285	262.29	58.774	299	53.5265	1081.76	53.5265	548.447
58.897	706.51	58.5615	290.74	58.807	316	53.5595	1067.36	53.5595	525.984
58.93	746.24	58.5945	329.11	58.84	327	53.5925	1046.11	53.5925	547.603
58.963	721.58	58.6275	368.4	58.873	306	53.6255	1034.69	53.6255	587.134
58.996	718.21	58.6605	357.04	58.906	276	53.6585	1048.63	53.6585	568.912
59.029	693.24	58.6935	376.45	58.939	266	53.6915	1042.71	53.6915	523.422
59.062	629.7	58.7265	395.31	58.972	237	53.7245	1011.24	53.7245	504.68
59.095	593.82	58.7595	421.04	59.005	245	53.7575	948.052	53.7575	488.98
59.128	525.35	58.7925	421.17	59.038	232	53.7905	912.552	53.7905	470.048
59.161	417.16	58.8255	407.64	59.071	184	53.8235	901.213	53.8235	501.074
59.194	360.91	58.8585	372.64	59.104	191	53.8565	817.611	53.8565	478.399
59.227	336.2	58.8915	343.19	59.137	171	53.8895	769.17	53.8895	445.83
59.26	282.27	58.9245	312.13	59.17	138	53.9225	743.495	53.9225	440.341
59.293	232.65	58.9575	265.5	59.203	132	53.9555	678.503	53.9555	419.754
59.326	210.14	58.9905	238.15	59.236	126	53.9885	678.089	53.9885	420.089
59.359	197.09	59.0235	224.02	59.269	126	54.0215	666.572	54.0215	411.06
59.392	187.73	59.0565	197.57	59.302	113	54.0545	639.245	54.0545	397.37
59.425	161.34	59.0895	166.69	59.335	107	54.0875	602.982	54.0875	385.607
59.458	149.29	59.1225	137.08	59.368	98	54.1205	583.235	54.1205	384.847
59.491	156.51	59.1555	117.35	59.401	124	54.1535	564.893	54.1535	356.283
59.524	145.83	59.1885	105.24	59.434	116	54.1865	544.244	54.1865	361.948
59.557	146.03	59.2215	90.55	59.467	101	54.2195	483.137	54.2195	331.34
59.59	124.28	59.2545	84.27	59.5	98	54.2525	449.312	54.2525	306.79
59.623	124.72	59.2875	81.43	59.533	111	54.2855	445.5	54.2855	319
59.656	116.92	59.3205	75.99	59.566	101	54.3185	451.473	54.3185	325.775
59.689	123.9	59.3535	74.84	59.599	98	54.3515	468.606	54.3515	320.708
59.722	122.64	59.3865	74.73	59.632	114	54.3845	445.868	54.3845	292.829
59.755	118.85	59.4195	74.24	59.665	110	54.4175	431.096	54.4175	309.245
59.788	116.16	59.4525	67.61	59.698	101	54.4505	397.473	54.4505	276.978
59.821	104.88	59.4855	63.25	59.731	115	54.4835	430.967	54.4835	305.672
59.854	119.75	59.5185	64.18	59.764	116	54.5165	354.937	54.5165	279.452
59.887	89.79	59.5515	59.83	59.797	113	54.5495	405.904	54.5495	264.952
59.92	118.77	59.5845	57.35	59.83	126	54.5825	401.809	54.5825	263.304
59.953	102.01	59.6175	56.68	59.863	95	54.6155	385.024	54.6155	289.963
59.986	108.92	59.6505	59.63	59.896	107	54.6485	382.042	54.6485	274.224
60.019	98.27	59.6835	57.22	59.929	105	54.6815	379.08	54.6815	236.04
60.052	116.3	59.7165	64.44	59.962	91	54.7145	394.371	54.7145	244.607
60.085	96.09	59.7495	62.91	59.995	111	54.7475	381.727	54.7475	241.208
60.118	102.5	59.7825	59.49	60.028	107	54.7805	376.323	54.7805	242.871
60.151	122.43	59.8155	59.4	60.061	111	54.8135	367.695	54.8135	236.541
60.184	106.66	59.8485	67.21	60.094	107	54.8465	355.168	54.8465	251.472
60.217	105	59.8815	56.11	60.127	98	54.8795	357.59	54.8795	241.333
60.25	100.56	59.9145	53.09	60.16	100	54.9125	366.848	54.9125	232.036
60.283	114	59.9475	57.18	60.193	90	54.9455	344.451	54.9455	254.549
60.316	93.59	59.9805	55.29	60.226	116	54.9785	341	54.9785	228.775
60.349	99.34	60.0135	56.83	60.259	109	55.0115	319.827	55.0115	235.857
60.382	106.02	60.0465	58.92	60.292	99	55.0445	323.508	55.0445	215.475
60.415	107	60.0795	64.56	60.325	101	55.0775	308.568	55.0775	206.892
60.448	99.7	60.1125	55.39	60.358	117	55.1105	304.191	55.1105	193.056
60.481	109.18	60.1455	63.9	60.391	123	55.1435	296.037	55.1435	209.112
60.514	122.22	60.1785	60.31	60.424	110	55.1765	310.458	55.1765	215.567
60.547	112.62	60.2115	59.1	60.457	99	55.2095	313.458	55.2095	205.205
60.58	112.04	60.2445	63.76	60.49	101	55.2425	293.281	55.2425	186.073
60.613	98.78	60.2775	53.38	60.523	99	55.2755	302.661	55.2755	198.153
60.646	110.92	60.3105	47.43	60.556	108	55.3085	313.132	55.3085	196.669
60.679	95.31	60.3435	50.09	60.589	98	55.3415	294.106	55.3415	188.236
60.712	84.87	60.3765	50.91	60.622	93	55.3745	296.618	55.3745	198.033
60.745	93.77	60.4095	54.5	60.655	83	55.4075	266.24	55.4075	193.962
60.778	97.31	60.4425	51.2	60.688	83	55.4405	268.064	55.4405	200.238
60.811	95.66	60.4755	57.73	60.721	96	55.4735	292.748	55.4735	207.68
60.844	98.3	60.5085	51.17	60.754	98	55.5065	268.794	55.5065	203.742
60.877	93.53	60.5415	48.36	60.787	81	55.5395	273.273	55.5395	186.174
60.91	93.17	60.5745	60.79	60.82	93	55.5725	267.936	55.5725	179.264
60.943	101.84	60.6075	49.59	60.853	102	55.6055	267.91	55.6055	180.619
60.976	110.26	60.6405	49.66	60.886	97	55.6385	276.427	55.6385	177.966
61.009	112.4	60.6735	52.62	60.919	104	55.6715	275.03	55.6715	180.752
61.042	107.33	60.7065	52.53	60.952	103	55.7045	270.093	55.7045	197.954
61.075	110.86	60.7395	46.19	60.985	102	55.7375	273.688	55.7375	186.387
61.108	112.09	60.7725	47.37	61.018	99	55.7705	270.214	55.7705	171.112
61.141	101.36	60.8055	61.4	61.051	100	55.8035	264	55.8035	167.109
61.174	93.93	60.8385	53.68	61.084	102	55.8365	266.654	55.8365	172.555
61.207	100.81	60.8715	49.77	61.117	100	55.8695	280.401	55.8695	181
61.24	113.08	60.9045	49.94	61.15	100	55.9025	274.822	55.9025	182.517
61.273	113.05	60.9375	50.05	61.183	94	55.9355	256.535	55.9355	176.606
61.306	101.24	60.9705	49.77	61.216	97	55.9685	240.552	55.9685	180.527
61.339	109.52	61.0035	57.54	61.249	101	56.0015	246.108	56.0015	191.129
61.372	121.97	61.0365	48.75	61.282	99	56.0345	269.91	56.0345	180.355
61.405	117.78	61.0695	54.8	61.315	110	56.0675	274.981	56.0675	159.384
61.438	118.7	61.1025	53.93	61.348	105	56.1005	276.133	56.1005	164.478
61.471	117	61.1355	52.59	61.381	86	56.1335	262.242	56.1335	189
61.504	111.71	61.1685	54.56	61.414	85	56.1665	246.765	56.1665	191.427
61.537	107.94	61.2015	61.13	61.447	94	56.1995	245.526	56.1995	185.597
61.57	110.18	61.2345	57.87	61.48	107	56.2325	257.445	56.2325	171
61.603	107.69	61.2675	55.16	61.513	117	56.2655	265.801	56.2655	161.471
61.636	111.15	61.3005	59.51	61.546	115	56.2985	268.016	56.2985	147.123
61.669	108.75	61.3335	63.01	61.579	101	56.3315	260.574	56.3315	156.459
61.702	114.33	61.3665	66.94	61.612	95	56.3645	220.4	56.3645	171.6
61.735	112.77	61.3995	63.83	61.645	109	56.3975	225.217	56.3975	177.209
61.768	101.58	61.4325	65.7	61.678	106	56.4305	256.303	56.4305	164.451
61.801	93.45	61.4655	66.07	61.711	108	56.4635	261.941	56.4635	153.709
61.834	109.84	61.4985	64.54	61.744	112	56.4965	275.112	56.4965	158.56
61.867	111.2	61.5315	69	61.777	117	56.5295	273.489	56.5295	174.327
61.9	105.43	61.5645	78.86	61.81	116	56.5625	252.155	56.5625	176.736
61.933	104.95	61.5975	78.24	61.843	112	56.5955	236.083	56.5955	171.8
61.966	130.25	61.6305	75.77	61.876	123	56.6285	263.451	56.6285	163.906
61.999	115.56	61.6635	76.23	61.909	130	56.6615	249.289	56.6615	152.792
62.032	128.32	61.6965	81.03	61.942	130	56.6945	246.52	56.6945	167.245
62.065	114.19	61.7295	87.21	61.975	134	56.7275	228.749	56.7275	179.452
62.098	118.77	61.7625	84.27	62.008	144	56.7605	274.225	56.7605	159.469
62.131	132.67	61.7955	87.63	62.041	155	56.7935	249.701	56.7935	154.372
62.164	118.93	61.8285	87.58	62.074	133	56.8265	236.636	56.8265	142.819
62.197	132.6	61.8615	81.1	62.107	124	56.8595	237.753	56.8595	156.196
62.23	118.26	61.8945	82.47	62.14	140	56.8925	287.075	56.8925	170.064
62.263	118.03	61.9275	88.15	62.173	122	56.9255	249.931	56.9255	131.5
62.296	106.21	61.9605	90.89	62.206	138	56.9585	230.747	56.9585	153.02
62.329	133.27	61.9935	82.58	62.239	125	56.9915	273.088	56.9915	171
62.362	125.37	62.0265	85.01	62.272	139	57.0245	274	57.0245	169.334
62.395	118.79	62.0595	88.31	62.305	118	57.0575	271.981	57.0575	149.252
62.428	129.84	62.0925	87.16	62.338	124	57.0905	243.513	57.0905	153.353
62.461	127	62.1255	89.83	62.371	117	57.1235	271.433	57.1235	159.66
62.494	127.14	62.1585	82.78	62.404	125	57.1565	257.83	57.1565	151.075
62.527	131.83	62.1915	81.21	62.437	117	57.1895	289.725	57.1895	153.962
62.56	121.01	62.2245	76.41	62.47	109	57.2225	268.003	57.2225	151
62.593	124.96	62.2575	76.18	62.503	123	57.2555	295.642	57.2555	150.013
62.626	116.21	62.2905	71.88	62.536	123	57.2885	271.635	57.2885	139.28
62.659	115.04	62.3235	73.93	62.569	107	57.3215	263.304	57.3215	145.734
62.692	138.8	62.3565	70.18	62.602	130	57.3545	283.885	57.3545	142.203
62.725	141.88	62.3895	66	62.635	121	57.3875	297.177	57.3875	131.697
62.758	139.22	62.4225	69	62.668	114	57.4205	260.115	57.4205	142.088
62.791	128.95	62.4555	66.98	62.701	105	57.4535	270.671	57.4535	170.341
62.824	124.39	62.4885	73.2	62.734	117	57.4865	268.405	57.4865	154.127
62.857	124.89	62.5215	74.09	62.767	105	57.5195	262.683	57.5195	142.253
62.89	121.5	62.5545	70.65	62.8	99	57.5525	271.608	57.5525	142.747
62.923	122.73	62.5875	64.78	62.833	114	57.5855	260.949	57.5855	146.443
62.956	121.3	62.6205	70.44	62.866	119	57.6185	275.115	57.6185	154.633
62.989	123.51	62.6535	74.66	62.899	120	57.6515	266.303	57.6515	159.342
63.022	125.65	62.6865	69.4	62.932	127	57.6845	248.365	57.6845	169.052
63.055	125.19	62.7195	66.6	62.965	107	57.7175	253.913	57.7175	150.744
63.088	115.4	62.7525	69.66	62.998	119	57.7505	244.834	57.7505	153.976
63.121	124.81	62.7855	71.73	63.031	111	57.7835	249.85	57.7835	150.505
63.154	118.7	62.8185	69.79	63.064	116	57.8165	239.643	57.8165	149
63.187	112.19	62.8515	75.39	63.097	107	57.8495	260.309	57.8495	145.961
63.22	128.24	62.8845	59.33	63.13	118	57.8825	245.589	57.8825	143.506
63.253	125.89	62.9175	58.27	63.163	116	57.9155	252.688	57.9155	143
63.286	119.38	62.9505	69.91	63.196	115	57.9485	227.687	57.9485	148.774
63.319	115.15	62.9835	62.31	63.229	123	57.9815	245.782	57.9815	136.818
63.352	115.4	63.0165	62.8	63.262	124	58.0145	262.179	58.0145	142.143
63.385	124.24	63.0495	67.7	63.295	123	58.0475	241.434	58.0475	153.838
63.418	103.07	63.0825	55.71	63.328	128	58.0805	228.986	58.0805	136.865
63.451	106.87	63.1155	72.3	63.361	114	58.1135	248.414	58.1135	133.585
63.484	121.48	63.1485	70.05	63.394	112	58.1465	241.561	58.1465	149.272
63.517	116.1	63.1815	69.32	63.427	115	58.1795	237.066	58.1795	157.9
63.55	114.12	63.2145	69.3	63.46	120	58.2125	239.379	58.2125	144.106
63.583	112.95	63.2475	61.4	63.493	109	58.2455	229.881	58.2455	138.648
63.616	125.95	63.2805	61.22	63.526	91	58.2785	247.217	58.2785	148.739
63.649	133.07	63.3135	73.1	63.559	117	58.3115	256.008	58.3115	149.921
63.682	128.71	63.3465	72.3	63.592	118	58.3445	258.98	58.3445	156.121
63.715	127	63.3795	72.72	63.625	121	58.3775	243.262	58.3775	147.393
63.748	133.57	63.4125	64.51	63.658	135	58.4105	233.626	58.4105	142.082
63.781	128.84	63.4455	69.1	63.691	133	58.4435	237.872	58.4435	149.596
63.814	133.05	63.4785	70.3	63.724	134	58.4765	239.117	58.4765	148.403
63.847	146.53	63.5115	70.35	63.757	137	58.5095	232.37	58.5095	146
63.88	142.04	63.5445	77.58	63.79	132	58.5425	239.308	58.5425	144.517
63.913	144.23	63.5775	78.82	63.823	144	58.5755	230.479	58.5755	144.445
63.946	144.51	63.6105	76.23	63.856	167	58.6085	213.316	58.6085	142.718
63.979	143.26	63.6435	85.26	63.889	165	58.6415	225.456	58.6415	144.475
64.012	144.97	63.6765	83.5	63.922	150	58.6745	222.451	58.6745	143.459
64.045	140.2	63.7095	76.64	63.955	134	58.7075	221.879	58.7075	130.552
64.078	140.27	63.7425	78.05	63.988	133	58.7405	220.307	58.7405	123.49
64.111	142.84	63.7755	87.11	64.021	149	58.7735	220.736	58.7735	132.982
64.144	163.56	63.8085	87.92	64.054	157	58.8065	220.457	58.8065	150.821
64.177	165.55	63.8415	86.4	64.087	168	58.8395	203.706	58.8395	146.718
64.21	165.18	63.8745	90.51	64.12	170	58.8725	225.871	58.8725	146.31
64.243	175.79	63.9075	86.38	64.153	166	58.9055	248.71	58.9055	140.281
64.276	182.45	63.9405	95.46	64.186	170	58.9385	234.931	58.9385	136.466
64.309	191.33	63.9735	91.41	64.219	183	58.9715	207.979	58.9715	160.435
64.342	220.94	64.0065	87.59	64.252	206	59.0045	208.828	59.0045	138.78
64.375	257.11	64.0395	100.46	64.285	204	59.0375	212.05	59.0375	136.436
64.408	240.79	64.0725	110.07	64.318	213	59.0705	229.162	59.0705	145.211
64.441	299.2	64.1055	117.86	64.351	241	59.1035	218.91	59.1035	147.136
64.474	321.19	64.1385	122.43	64.384	254	59.1365	227.4	59.1365	133.333
64.507	343.64	64.1715	141.12	64.417	259	59.1695	228.841	59.1695	135.222
64.54	389.26	64.2045	141.75	64.45	297	59.2025	239.243	59.2025	133.137
64.573	484.62	64.2375	143.85	64.483	304	59.2355	220.744	59.2355	141.857
64.606	491.04	64.2705	171.41	64.516	306	59.2685	235.833	59.2685	140.16
64.639	467.44	64.3035	198.9	64.549	309	59.3015	260.661	59.3015	148.203
64.672	491.88	64.3365	218.09	64.582	303	59.3345	268.896	59.3345	150.335
64.705	454.21	64.3695	232.71	64.615	305	59.3675	238.369	59.3675	154.931
64.738	431.62	64.4025	243.58	64.648	288	59.4005	218.986	59.4005	150.331
64.771	403.14	64.4355	259.87	64.681	263	59.4335	228.847	59.4335	149.86
64.804	392.14	64.4685	273.46	64.714	277	59.4665	231.925	59.4665	136.878
64.837	386.61	64.5015	269.92	64.747	247	59.4995	252.684	59.4995	132.296
64.87	376.13	64.5345	268.32	64.78	231	59.5325	234.941	59.5325	149.724
64.903	317.84	64.5675	262.7	64.813	242	59.5655	269.114	59.5655	160.034
64.936	322.97	64.6005	246.93	64.846	207	59.5985	234.373	59.5985	135.703
64.969	299.58	64.6335	246.59	64.879	201	59.6315	228.847	59.6315	152.923
65.002	264.01	64.6665	241.98	64.912	195	59.6645	240.802	59.6645	150.971
65.035	319.35	64.6995	228.87	64.945	191	59.6975	266.483	59.6975	135.742
65.068	306.3	64.7325	232.09	64.978	190	59.7305	257.156	59.7305	130.609
65.101	267.03	64.7655	234.3	65.011	199	59.7635	260.525	59.7635	121.396
65.134	268.47	64.7985	224.63	65.044	180	59.7965	243.234	59.7965	136.151
65.167	296.99	64.8315	220.26	65.077	172	59.8295	259.997	59.8295	146.985
65.2	293.04	64.8645	209.76	65.11	159	59.8625	257.035	59.8625	134.15
65.233	312.57	64.8975	212.33	65.143	165	59.8955	271.638	59.8955	141.807
65.266	274.37	64.9305	200.79	65.176	154	59.9285	268.147	59.9285	142.963
65.299	285.39	64.9635	195.95	65.209	162	59.9615	261.346	59.9615	144.901
65.332	243.68	64.9965	194.19	65.242	151	59.9945	266.628	59.9945	149.69
65.365	251.21	65.0295	190.17	65.275	146	60.0275	260.523	60.0275	127.793
65.398	197.09	65.0625	183.68	65.308	131	60.0605	292.855	60.0605	125.087
65.431	223.59	65.0955	178.45	65.341	135	60.0935	248.3	60.0935	157.4
65.464	214.54	65.1285	165.36	65.374	134	60.1265	266.071	60.1265	145.028
65.497	188.44	65.1615	146.88	65.407	138	60.1595	276.872	60.1595	137.752
65.53	198.83	65.1945	127.58	65.44	142	60.1925	293.517	60.1925	157.69
65.563	198.44	65.2275	131.95	65.473	127	60.2255	284.108	60.2255	144.861
65.596	198	65.2605	125.6	65.506	142	60.2585	321.329	60.2585	149.531
65.629	168.24	65.2935	111.11	65.539	114	60.2915	306.748	60.2915	150.176
65.662	134.32	65.3265	114.88	65.572	113	60.3245	329.591	60.3245	150.811
65.695	156.05	65.3595	98.33	65.605	117	60.3575	328.011	60.3575	142.213
65.728	135.39	65.3925	95.4	65.638	110	60.3905	337.007	60.3905	135.283
65.761	152.06	65.4255	91.37	65.671	120	60.4235	346.189	60.4235	137.868
65.794	159	65.4585	88.81	65.704	112	60.4565	363.219	60.4565	145.848
65.827	154.5	65.4915	90.5	65.737	113	60.4895	323.851	60.4895	142.014
65.86	171.45	65.5245	81.35	65.77	109	60.5225	330.334	60.5225	137.793
65.893	148.25	65.5575	87.85	65.803	97	60.5555	348.845	60.5555	140.615
65.926	119.89	65.5905	81.96	65.836	106	60.5885	370.759	60.5885	141.29
65.959	130.51	65.6235	83.3	65.869	111	60.6215	411.49	60.6215	143.791
65.992	122.19	65.6565	83.26	65.902	99	60.6545	398.597	60.6545	140.204
66.025	131.87	65.6895	81.14	65.935	112	60.6875	398.776	60.6875	145.397
66.058	140	65.7225	69.39	65.968	107	60.7205	399.722	60.7205	133.825
66.091	130.9	65.7555	69.99	66.001	110	60.7535	399.589	60.7535	128.589
66.124	126.64	65.7885	61.88	66.034	115	60.7865	381.33	60.7865	140.787
66.157	134.49	65.8215	62.94	66.067	105	60.8195	369.378	60.8195	128.966
66.19	134.72	65.8545	64.32	66.1	116	60.8525	381.794	60.8525	126.529
66.223	123.01	65.8875	63.1	66.133	106	60.8855	364.944	60.8855	123.051
66.256	115.83	65.9205	66.21	66.166	99	60.9185	331.65	60.9185	129.847
66.289	109.84	65.9535	59.86	66.199	107	60.9515	313.716	60.9515	131.573
66.322	97.58	65.9865	57.9	66.232	113	60.9845	301.738	60.9845	128.793
66.355	93.19	66.0195	70.97	66.265	108	61.0175	299.822	61.0175	132.638
66.388	105.18	66.0525	58.56	66.298	99	61.0505	291.799	61.0505	144.134
66.421	101.44	66.0855	67.1	66.331	99	61.0835	284.604	61.0835	153.521
66.454	95.62	66.1185	65.42	66.364	97	61.1165	270.233	61.1165	139.266
66.487	102.49	66.1515	59.82	66.397	97	61.1495	268.368	61.1495	123.018
66.52	98.66	66.1845	63.08	66.43	94	61.1825	276.724	61.1825	131.139
66.553	89.69	66.2175	60.96	66.463	96	61.2155	260.597	61.2155	127.425
66.586	85.54	66.2505	56.05	66.496	95	61.2485	260.523	61.2485	117.863
66.619	91.71	66.2835	57.13	66.529	85	61.2815	270.776	61.2815	126.89
66.652	95.65	66.3165	58.29	66.562	93	61.3145	255.033	61.3145	131.458
66.685	99.29	66.3495	68.72	66.595	101	61.3475	230.028	61.3475	135.58
66.718	99.72	66.3825	58.38	66.628	102	61.3805	225.918	61.3805	140.29
66.751	82.79	66.4155	62.96	66.661	105	61.4135	217.862	61.4135	140.114
66.784	85.92	66.4485	65.75	66.694	96	61.4465	208.32	61.4465	135.251
66.817	90.49	66.4815	62.75	66.727	95	61.4795	226.93	61.4795	141.465
66.85	91.92	66.5145	63.53	66.76	105	61.5125	203.367	61.5125	134.495
66.883	91.38	66.5475	64.16	66.793	91	61.5455	207.031	61.5455	141.75
66.916	93.67	66.5805	67.53	66.826	97	61.5785	232.98	61.5785	146.338
66.949	92.68	66.6135	67.93	66.859	91	61.6115	233.905	61.6115	138.631
66.982	95.08	66.6465	65.86	66.892	93	61.6445	217.19	61.6445	124.694
67.015	103.48	66.6795	67.07	66.925	90	61.6775	201.655	61.6775	121.068
67.048	103.89	66.7125	62.89	66.958	86	61.7105	201.61	61.7105	120.732
67.081	94.11	66.7455	68.96	66.991	88	61.7435	216.268	61.7435	139.875
67.114	93.38	66.7785	68.05	67.024	75	61.7765	214.448	61.7765	133.004
67.147	104.53	66.8115	64.01	67.057	87	61.8095	216.704	61.8095	101.154
67.18	102.56	66.8445	63.57	67.09	97	61.8425	234.353	61.8425	115.369
67.213	113.64	66.8775	69.77	67.123	103	61.8755	196.346	61.8755	127.175
67.246	115.13	66.9105	73.34	67.156	101	61.9085	212.819	61.9085	118.842
67.279	87.14	66.9435	75.26	67.189	112	61.9415	213.504	61.9415	126.96
67.312	100.18	66.9765	77.5	67.222	116	61.9745	200.489	61.9745	129.565
67.345	119	67.0095	79.45	67.255	124	62.0075	189.167	62.0075	121.833
67.378	119.63	67.0425	85.32	67.288	117	62.0405	189.384	62.0405	117.387
67.411	127.46	67.0755	92.18	67.321	120	62.0735	190.102	62.0735	125.707
67.444	154.66	67.1085	91.11	67.354	135	62.1065	213.197	62.1065	129.742
67.477	159.95	67.1415	96.48	67.387	126	62.1395	203.788	62.1395	127.535
67.51	167.85	67.1745	115.53	67.42	141	62.1725	221.998	62.1725	126.588
67.543	178.36	67.2075	122.19	67.453	130	62.2055	197.091	62.2055	145.274
67.576	211.73	67.2405	127.8	67.486	119	62.2385	211.834	62.2385	109.565
67.609	220.95	67.2735	141.23	67.519	121	62.2715	254.573	62.2715	128.262
67.642	233.67	67.3065	152.09	67.552	133	62.3045	219.788	62.3045	131.735
67.675	229.67	67.3395	151.65	67.585	150	62.3375	216.524	62.3375	126.597
67.708	266.73	67.3725	152.48	67.618	113	62.3705	228.447	62.3705	117
67.741	257.81	67.4055	164.66	67.651	134	62.4035	209.316	62.4035	117.271
67.774	246.86	67.4385	171	67.684	106	62.4365	230.031	62.4365	134.967
67.807	219.22	67.4715	160.12	67.717	118	62.4695	242.867	62.4695	121.144
67.84	179.82	67.5045	162.96	67.75	111	62.5025	213.687	62.5025	134.679
67.873	196.41	67.5375	158.85	67.783	96	62.5355	212.036	62.5355	116.675
67.906	171.23	67.5705	152.12	67.816	96	62.5685	217.711	62.5685	100.771
67.939	143.63	67.6035	143.85	67.849	101	62.6015	209.547	62.6015	119.723
67.972	155.94	67.6365	142.22	67.882	83	62.6345	205.294	62.6345	103.396
68.005	146	67.6695	132.55	67.915	90	62.6675	207.742	62.6675	110.225
68.038	132.35	67.7025	116.27	67.948	90	62.7005	239.544	62.7005	137.136
68.071	118.52	67.7355	112.28	67.981	75	62.7335	212.787	62.7335	126.671
68.104	104.7	67.7685	105.83	68.014	74	62.7665	242.287	62.7665	121.496
68.137	92.61	67.8015	88.55	68.047	66	62.7995	221.964	62.7995	110.64
68.17	96.12	67.8345	76.31	68.08	71	62.8325	207.792	62.8325	121.76
68.203	106.25	67.8675	78.2	68.113	69	62.8655	186.725	62.8655	108.077
68.236	88.96	67.9005	70.11	68.146	66	62.8985	188.778	62.8985	123.984
68.269	85.82	67.9335	60.06	68.179	71	62.9315	222.51	62.9315	130.438
68.302	94.03	67.9665	62.19	68.212	65	62.9645	221.199	62.9645	117.398
68.335	81.78	67.9995	54.81	68.245	73	62.9975	211.125	62.9975	116.362
68.368	74.89	68.0325	55.52	68.278	86	63.0305	198.927	63.0305	117
68.401	80.88	68.0655	47.72	68.311	84	63.0635	205.908	63.0635	127.671
68.434	69.46	68.0985	39.4	68.344	77	63.0965	214.996	63.0965	122.755
68.467	62.78	68.1315	45.48	68.377	76	63.1295	205.947	63.1295	107.473
68.5	73.63	68.1645	44.99	68.41	64	63.1625	211.415	63.1625	115.312
68.533	66.57	68.1975	42.43	68.443	68	63.1955	193.652	63.1955	114.307
68.566	78.13	68.2305	43.85	68.476	65	63.2285	204.571	63.2285	114.796
68.599	71.22	68.2635	36.05	68.509	77	63.2615	216.432	63.2615	122.177
68.632	59.59	68.2965	36.01	68.542	82	63.2945	216.653	63.2945	124.326
68.665	72.26	68.3295	29.79	68.575	59	63.3275	229.221	63.3275	132.594
68.698	71.54	68.3625	40.74	68.608	54	63.3605	213.954	63.3605	128.571
68.731	78.49	68.3955	49.08	68.641	59	63.3935	210.901	63.3935	122.093
68.764	86.25	68.4285	39.99	68.674	67	63.4265	218.492	63.4265	130.97
68.797	77.81	68.4615	43.51	68.707	73	63.4595	226.105	63.4595	132.116
68.83	69	68.4945	41.8	68.74	67	63.4925	206.087	63.4925	121.228
68.863	64.65	68.5275	35.55	68.773	66	63.5255	192.926	63.5255	120.682
68.896	67.03	68.5605	44.5	68.806	75	63.5585	212.176	63.5585	118.847
68.929	62.69	68.5935	35.51	68.839	70	63.5915	223.32	63.5915	109.961
68.962	63.6	68.6265	34.3	68.872	64	63.6245	213.791	63.6245	113.114
68.995	65.78	68.6595	38.85	68.905	72	63.6575	208.069	63.6575	120.069
69.028	63.52	68.6925	37.16	68.938	80	63.6905	214.742	63.6905	111.604
69.061	70.14	68.7255	38.81	68.971	80	63.7235	208.795	63.7235	112.168
69.094	68.51	68.7585	42.39	69.004	75	63.7565	198	63.7565	122.49
69.127	62.46	68.7915	39.62	69.037	73	63.7895	205.261	63.7895	124
69.16	68.74	68.8245	34.07	69.07	69	63.8225	212.057	63.8225	124.943
69.193	68	68.8575	34.56	69.103	70	63.8555	209.624	63.8555	122.33
69.226	67.28	68.8905	33.91	69.136	75	63.8885	210.677	63.8885	131.384
69.259	73.69	68.9235	31.19	69.169	75	63.9215	214.433	63.9215	139.33
69.292	80.04	68.9565	34.93	69.202	77	63.9545	199.429	63.9545	125.054
69.325	99.63	68.9895	34.59	69.235	74	63.9875	187.389	63.9875	124.674
69.358	106.43	69.0225	42.1	69.268	76	64.0205	191.902	64.0205	123.671
69.391	108.79	69.0555	38.64	69.301	90	64.0535	184.127	64.0535	122.807
69.424	117.05	69.0885	34.82	69.334	107	64.0865	192.149	64.0865	134.778
69.457	126.13	69.1215	37.92	69.367	103	64.1195	188.285	64.1195	125.636
69.49	174.21	69.1545	40.5	69.4	97	64.1525	188.035	64.1525	117.38
69.523	176.63	69.1875	47	69.433	111	64.1855	195.982	64.1855	122.991
69.556	178.43	69.2205	48.45	69.466	113	64.2185	198.729	64.2185	122.286
69.589	215.79	69.2535	47.82	69.499	136	64.2515	185.448	64.2515	116.598
69.622	219.62	69.2865	48.61	69.532	140	64.2845	203.533	64.2845	130.112
69.655	204.62	69.3195	58.24	69.565	164	64.3175	201.574	64.3175	117.409
69.688	179.1	69.3525	61.94	69.598	164	64.3505	183.343	64.3505	122.346
69.721	173.22	69.3855	66.73	69.631	166	64.3835	203.179	64.3835	129.847
69.754	166.81	69.4185	82.35	69.664	168	64.4165	190.367	64.4165	134.172
69.787	158.91	69.4515	96.57	69.697	168	64.4495	178.081	64.4495	118.318
69.82	168.37	69.4845	108.48	69.73	159	64.4825	189.371	64.4825	136
69.853	136.87	69.5175	120.86	69.763	150	64.5155	206.853	64.5155	136
69.886	112.85	69.5505	124.33	69.796	171	64.5485	207.042	64.5485	133.874
69.919	134.04	69.5835	116.21	69.829	187	64.5815	185.045	64.5815	130.238
69.952	106.58	69.6165	106.4	69.862	159	64.6145	213.472	64.6145	149.632
69.985	120.84	69.6495	107.16	69.895	149	64.6475	194.446	64.6475	128
70.018	104.15	69.6825	109.67	69.928	150	64.6805	184.145	64.6805	126.43
70.051	104.07	69.7155	109.37	69.961	119	64.7135	174.301	64.7135	118.041
70.084	99.2	69.7485	102.08	69.994	123	64.7465	182.061	64.7465	126.879
70.117	106.61	69.7815	96.99	70.027	134	64.7795	175.733	64.7795	143.305
70.15	94.91	69.8145	101.59	70.06	113	64.8125	184.304	64.8125	158.854
70.183	96.13	69.8475	93.1	70.093	109	64.8455	206.523	64.8455	119.113
70.216	118.82	69.8805	88.06	70.126	107	64.8785	200.064	64.8785	131.933
70.249	102.32	69.9135	82.37	70.159	106	64.9115	186.512	64.9115	132.735
70.282	90.65	69.9465	78.44	70.192	116	64.9445	178.54	64.9445	161.67
70.315	83.47	69.9795	73.39	70.225	112	64.9775	191.608	64.9775	130.971
70.348	98	70.0125	63.01	70.258	89	65.0105	212.228	65.0105	130
70.381	97.95	70.0455	70.13	70.291	101	65.0435	225.883	65.0435	130.12
70.414	90.05	70.0785	69.43	70.324	81	65.0765	194.288	65.0765	162.703
70.447	96.87	70.1115	58.89	70.357	78	65.1095	194.978	65.1095	127.779
70.48	105.71	70.1445	56.73	70.39	94	65.1425	201.76	65.1425	144.383
70.513	89.75	70.1775	57.85	70.423	72	65.1755	217.249	65.1755	158.343
70.546	91.83	70.2105	55.97	70.456	71	65.2085	202.013	65.2085	168.404
70.579	96.65	70.2435	54.49	70.489	83	65.2415	195.433	65.2415	146.733
70.612	97.92	70.2765	54.07	70.522	68	65.2745	190.424	65.2745	187.097
70.645	93.47	70.3095	55.06	70.555	83	65.3075	192.708	65.3075	172.047
70.678	109.06	70.3425	52.03	70.588	91	65.3405	168.084	65.3405	153.093
70.711	83.73	70.3755	59.54	70.621	78	65.3735	193.071	65.3735	184.334
70.744	91.27	70.4085	56.02	70.654	78	65.4065	191.813	65.4065	175.167
70.777	95.56	70.4415	52.19	70.687	99	65.4395	208.039	65.4395	183.223
70.81	76.64	70.4745	53.18	70.72	100	65.4725	226.947	65.4725	186.679
70.843	78.8	70.5075	50.15	70.753	87	65.5055	230	65.5055	209.32
70.876	72.65	70.5405	52.4	70.786	98	65.5385	240.582	65.5385	185.51
70.909	82.25	70.5735	50.49	70.819	92	65.5715	218.959	65.5715	183.808
70.942	95.29	70.6065	43.57	70.852	84	65.6045	212.211	65.6045	173.958
70.975	87.88	70.6395	54.23	70.885	85	65.6375	248.476	65.6375	189.626
71.008	90.36	70.6725	47.9	70.918	69	65.6705	254.419	65.6705	202.634
71.041	68.65	70.7055	44.68	70.951	85	65.7035	240.987	65.7035	216.262
71.074	67.67	70.7385	50.8	70.984	86	65.7365	236.262	65.7365	184.568
71.107	89.66	70.7715	46.72	71.017	83	65.7695	249.059	65.7695	177.079
71.14	69.82	70.8045	43.86	71.05	70	65.8025	220.495	65.8025	180.426
71.173	85.7	70.8375	46.27	71.083	87	65.8355	223.105	65.8355	202.007
71.206	92.17	70.8705	48.22	71.116	81	65.8685	232.75	65.8685	202.061
71.239	79.16	70.9035	44.13	71.149	78	65.9015	240.075	65.9015	188.551
71.272	85.97	70.9365	47.93	71.182	81	65.9345	235.715	65.9345	209.168
71.305	92.65	70.9695	44.86	71.215	89	65.9675	235.248	65.9675	209.656
71.338	94.28	71.0025	44.8	71.248	82	66.0005	229.356	66.0005	190.26
71.371	101.27	71.0355	46.81	71.281	73	66.0335	218.132	66.0335	191.741
71.404	105	71.0685	41.61	71.314	79	66.0665	251.928	66.0665	196.388
71.437	108.61	71.1015	50.43	71.347	83	66.0995	266.415	66.0995	189.41
71.47	108.06	71.1345	51.74	71.38	82	66.1325	252.376	66.1325	194.97
71.503	95.05	71.1675	51.8	71.413	93	66.1655	256.181	66.1655	198.557
71.536	104.47	71.2005	49.92	71.446	96	66.1985	242.798	66.1985	179.726
71.569	118.55	71.2335	48.47	71.479	82	66.2315	248.941	66.2315	187.844
71.602	109.85	71.2665	44.35	71.512	85	66.2645	261.105	66.2645	193.211
71.635	104.1	71.2995	53.93	71.545	96	66.2975	256	66.2975	176.721
71.668	107.03	71.3325	53.88	71.578	90	66.3305	265.701	66.3305	164.873
71.701	118.01	71.3655	51.81	71.611	81	66.3635	273.008	66.3635	165.473
71.734	111.41	71.3985	48.3	71.644	79	66.3965	271.485	66.3965	178.794
71.767	86.87	71.4315	47.6	71.677	80	66.4295	268.219	66.4295	178.91
71.8	91.95	71.4645	47.88	71.71	91	66.4625	277.341	66.4625	179.28
71.833	112.85	71.4975	56.14	71.743	93	66.4955	286.737	66.4955	178.263
71.866	116.06	71.5305	55.5	71.776	93	66.5285	295.52	66.5285	168.478
71.899	109.73	71.5635	47.73	71.809	91	66.5615	319.111	66.5615	176.799
71.932	99.35	71.5965	46.54	71.842	79	66.5945	326.913	66.5945	167.669
71.965	92.99	71.6295	49.71	71.875	81	66.6275	336.778	66.6275	145.413
71.998	102.39	71.6625	45.23	71.908	69	66.6605	326.017	66.6605	141.847
72.031	111.23	71.6955	41.33	71.941	69	66.6935	321.32	66.6935	134.427
72.064	119.94	71.7285	41.81	71.974	69	66.7265	361.537	66.7265	128.589
72.097	107.51	71.7615	44.01	72.007	76	66.7595	362.535	66.7595	144.349
72.13	98.31	71.7945	45.73	72.04	80	66.7925	346.339	66.7925	153.66
72.163	90.41	71.8275	46.2	72.073	77	66.8255	359.395	66.8255	141.493
72.196	91.53	71.8605	46.2	72.106	66	66.8585	349.525	66.8585	146.375
72.229	106.3	71.8935	44.88	72.139	72	66.8915	334.409	66.8915	132.452
72.262	109.86	71.9265	47.76	72.172	82	66.9245	338.095	66.9245	128.812
72.295	116.18	71.9595	46.88	72.205	87	66.9575	351	66.9575	138.026
72.328	114.52	71.9925	47.69	72.238	83	66.9905	353.577	66.9905	129.227
72.361	110.8	72.0255	49.5	72.271	76	67.0235	343.352	67.0235	129.206
72.394	97.58	72.0585	50.54	72.304	74	67.0565	293.649	67.0565	130.421
72.427	106.22	72.0915	49.32	72.337	67	67.0895	316.034	67.0895	113.759
72.46	105.74	72.1245	49.49	72.37	76	67.1225	336.649	67.1225	118.55
72.493	103.96	72.1575	48.33	72.403	68	67.1555	316.304	67.1555	115.334
72.526	118.03	72.1905	47.47	72.436	65	67.1885	301.546	67.1885	127.547
72.559	129.23	72.2235	50.05	72.469	72	67.2215	294.353	67.2215	135.784
72.592	132.84	72.2565	48.53	72.502	76	67.2545	247.626	67.2545	116.555
72.625	98.52	72.2895	49.69	72.535	70	67.2875	249.704	67.2875	99.8716
72.658	118.33	72.3225	57.15	72.568	71	67.3205	246.071	67.3205	115.202
72.691	112.79	72.3555	57.74	72.601	62	67.3535	267.659	67.3535	139.558
72.724	106.71	72.3885	52.21	72.634	73	67.3865	232.242	67.3865	116.121
72.757	127.75	72.4215	53.78	72.667	68	67.4195	264.544	67.4195	133.626
72.79	115.42	72.4545	58.66	72.7	74	67.4525	229.223	67.4525	130.727
72.823	109.21	72.4875	55.51	72.733	75	67.4855	209.613	67.4855	137.57
72.856	112.06	72.5205	57.21	72.766	74	67.5185	217.889	67.5185	118.333
72.889	112.5	72.5535	64.62	72.799	74	67.5515	215.572	67.5515	122.33
72.922	102.23	72.5865	60.14	72.832	90	67.5845	206.513	67.5845	86.3283
72.955	108.56	72.6195	63.82	72.865	63	67.6175	222.14	67.6175	128.702
72.988	87.21	72.6525	68.43	72.898	73	67.6505	174.054	67.6505	112.074
73.021	114.85	72.6855	60.74	72.931	67	67.6835	184.915	67.6835	126.884
73.054	96.34	72.7185	63.07	72.964	68	67.7165	192.837	67.7165	118.183
73.087	114.42	72.7515	61.63	72.997	85	67.7495	182.363	67.7495	100.594
73.12	126.48	72.7845	62.85	73.03	100	67.7825	209.676	67.7825	129.584
73.153	127.94	72.8175	62.18	73.063	80	67.8155	188.399	67.8155	114.991
73.186	106.57	72.8505	62.88	73.096	86	67.8485	188.858	67.8485	139.084
73.219	103.16	72.8835	60.29	73.129	76	67.8815	158.759	67.8815	113.508
73.252	103	72.9165	58.34	73.162	90	67.9145	173.172	67.9145	113.711
73.285	102.11	72.9495	55.77	73.195	77	67.9475	175.891	67.9475	114
73.318	105.52	72.9825	60	73.228	80	67.9805	180.392	67.9805	106.972
73.351	106.87	73.0155	61.8	73.261	79	68.0135	180.134	68.0135	107.732
73.384	118.12	73.0485	67.11	73.294	88	68.0465	170.615	68.0465	114.826
73.417	104.82	73.0815	68.13	73.327	92	68.0795	176.565	68.0795	109.276
73.45	100.34	73.1145	67.77	73.36	95	68.1125	197.042	68.1125	104.688
73.483	97.55	73.1475	66.16	73.393	93	68.1455	180.618	68.1455	112.968
73.516	108.27	73.1805	50	73.426	91	68.1785	184.829	68.1785	101.355
73.549	106.25	73.2135	49.44	73.459	91	68.2115	171.99	68.2115	87.7302
73.582	105	73.2465	49.41	73.492	76	68.2445	176.551	68.2445	98.9921
73.615	99.63	73.2795	63.95	73.525	95	68.2775	167.53	68.2775	106.059
73.648	91.96	73.3125	62.29	73.558	95	68.3105	166.256	68.3105	116.025
73.681	93.71	73.3455	54.8	73.591	79	68.3435	172.176	68.3435	118.261
73.714	97.19	73.3785	57.65	73.624	87	68.3765	158.738	68.3765	102.738
73.747	92.27	73.4115	61.27	73.657	85	68.4095	177.28	68.4095	118.424
73.78	106.19	73.4445	54.6	73.69	67	68.4425	169.463	68.4425	122.791
73.813	105.4	73.4775	54.55	73.723	68	68.4755	175.777	68.4755	111.356
73.846	94.53	73.5105	52.14	73.756	74	68.5085	151.571	68.5085	99.5618
73.879	102.32	73.5435	50.76	73.789	81	68.5415	157.57	68.5415	99.9814
73.912	99.51	73.5765	51.44	73.822	78	68.5745	166.047	68.5745	123.48
73.945	95.64	73.6095	66.74	73.855	85	68.6075	180.319	68.6075	118.405
73.978	102.28	73.6425	53.12	73.888	73	68.6405	187.749	68.6405	102.118
74.011	100.46	73.6755	48.86	73.921	61	68.6735	163.706	68.6735	104.743
74.044	104.23	73.7085	60.4	73.954	70	68.7065	165.209	68.7065	109
74.077	97.79	73.7415	59.32	73.987	78	68.7395	174.825	68.7395	112.526
74.11	85.96	73.7745	55.66	74.02	85	68.7725	179.176	68.7725	109.249
74.143	101.08	73.8075	51.85	74.053	86	68.8055	176.813	68.8055	110.624
74.176	115	73.8405	50.21	74.086	90	68.8385	176.948	68.8385	108.952
74.209	107.98	73.8735	52.18	74.119	88	68.8715	176.166	68.8715	104
74.242	104.64	73.9065	48.3	74.152	93	68.9045	194.029	68.9045	110.294
74.275	104.43	73.9395	54.69	74.185	93	68.9375	209.393	68.9375	109.346
74.308	107.02	73.9725	65.31	74.218	88	68.9705	200.008	68.9705	102.501
74.341	102.71	74.0055	54.87	74.251	92	69.0035	201.812	69.0035	110.272
74.374	99.19	74.0385	57.79	74.284	84	69.0365	187.673	69.0365	114.261
74.407	112.03	74.0715	58.87	74.317	83	69.0695	181.529	69.0695	111.306
74.44	103.66	74.1045	53.88	74.35	88	69.1025	196.168	69.1025	107.719
74.473	92.02	74.1375	51.69	74.383	85	69.1355	194.668	69.1355	99.128
74.506	99.3	74.1705	58.33	74.416	91	69.1685	218.088	69.1685	99.2701
74.539	96.17	74.2035	57.17	74.449	86	69.2015	234.661	69.2015	105.518
74.572	93.8	74.2365	48.58	74.482	87	69.2345	225.806	69.2345	109.213
74.605	99.37	74.2695	50.62	74.515	90	69.2675	220.146	69.2675	99.604
74.638	112.13	74.3025	52.25	74.548	80	69.3005	213.254	69.3005	95.8462
74.671	113.64	74.3355	48.51	74.581	84	69.3335	209.119	69.3335	102.559
74.704	110.55	74.3685	54.75	74.614	85	69.3665	200.525	69.3665	104.865
74.737	104.65	74.4015	59.15	74.647	80	69.3995	210.408	69.3995	113.33
74.77	101.35	74.4345	53.77	74.68	78	69.4325	229.467	69.4325	107.167
74.803	98.13	74.4675	50.97	74.713	92	69.4655	192.951	69.4655	98.8575
74.836	101.49	74.5005	50.44	74.746	93	69.4985	187.174	69.4985	104.485
74.869	115.85	74.5335	49.4	74.779	91	69.5315	207.471	69.5315	108
74.902	109.37	74.5665	51.75	74.812	100	69.5645	189.803	69.5645	108.272
74.935	107.51	74.5995	46.1	74.845	95	69.5975	190.417	69.5975	104.856
74.968	92.5	74.6325	44.8	74.878	116	69.6305	168.42	69.6305	93.2464
75.001	98.96	74.6655	49.98	74.911	89	69.6635	182.429	69.6635	95.4023
75.034	112.09	74.6985	56.06	74.944	90	69.6965	171.126	69.6965	100.884
75.067	104.11	74.7315	54.96	74.977	109	69.7295	160.375	69.7295	106.501
75.1	110.02	74.7645	52.95	75.01	88	69.7625	161.329	69.7625	107.385
75.133	103.3	74.7975	52.98	75.043	90	69.7955	175.916	69.7955	76.2125
75.166	108.65	74.8305	51.45	75.076	87	69.8285	181.194	69.8285	94.4885
75.199	108.12	74.8635	52.99	75.109	107	69.8615	185.579	69.8615	95.631
75.232	112.67	74.8965	54.27	75.142	94	69.8945	181.195	69.8945	114.419
75.265	101.76	74.9295	56.18	75.175	84	69.9275	193.238	69.9275	110.072
75.298	82.84	74.9625	52.62	75.208	80	69.9605	151.639	69.9605	105.199
75.331	95.89	74.9955	50.54	75.241	80	69.9935	170.678	69.9935	113.249
75.364	94.61	75.0285	55.91	75.274	94	70.0265	166.012	70.0265	104.539
75.397	92.78	75.0615	52.01	75.307	92	70.0595	149.214	70.0595	82.5583
75.43	110.56	75.0945	51.88	75.34	102	70.0925	173.168	70.0925	99.5838
75.463	92.47	75.1275	54.15	75.373	86	70.1255	162.567	70.1255	94.2269
75.496	98.83	75.1605	56.94	75.406	93	70.1585	171.956	70.1585	97.471
75.529	75	75.1935	59.85	75.439	105	70.1915	170.906	70.1915	86.566
75.562	75.36	75.2265	50.42	75.472	87	70.2245	167.605	70.2245	103.887
75.595	92.18	75.2595	50.03	75.505	100	70.2575	147.062	70.2575	98.0185
75.628	112.92	75.2925	50.46	75.538	72	70.2905	156.935	70.2905	100.981
75.661	107.1	75.3255	54.33	75.571	109	70.3235	161.904	70.3235	107.866
75.694	69.14	75.3585	50.61	75.604	86	70.3565	151.349	70.3565	73.1436
75.727	88.12	75.3915	48.85	75.637	103	70.3895	155.778	70.3895	92.0674
75.76	76.71	75.4245	49.45	75.67	119	70.4225	141.856	70.4225	95.8289
75.793	95.59	75.4575	51.26	75.703	96	70.4555	160.536	70.4555	99.7212
75.826	82.28	75.4905	57.05	75.736	104	70.4885	171.177	70.4885	92.6587
75.859	90.98	75.5235	60.83	75.769	88	70.5215	127.654	70.5215	96.5251
75.892	74.1	75.5565	59.34	75.802	102	70.5545	147.987	70.5545	92.5381
75.925	87.88	75.5895	59.02	75.835	91	70.5875	158.038	70.5875	99.9176
75.958	92.61	75.6225	59.57	75.868	85	70.6205	144.259	70.6205	105.335
75.991	90.43	75.6555	57.14	75.901	108	70.6535	142.854	70.6535	108.563
76.024	92.53	75.6885	50.23	75.934	95	70.6865	146.367	70.6865	97.2147
76.057	87.18	75.7215	43.83	75.967	75	70.7195	154.463	70.7195	106.608
76.09	81.9	75.7545	41.59	76	74	70.7525	164.982	70.7525	107.367
76.123	80.19	75.7875	48.01	76.033	81	70.7855	131.629	70.7855	112.627
76.156	92.7	75.8205	52.59	76.066	86	70.8185	138.825	70.8185	106.088
76.189	88.97	75.8535	50.75	76.099	77	70.8515	133.657	70.8515	93.0996
76.222	88.54	75.8865	49.75	76.132	79	70.8845	153.213	70.8845	112.979
76.255	87.49	75.9195	40.75	76.165	84	70.9175	144.18	70.9175	101.167
76.288	100.38	75.9525	42.12	76.198	91	70.9505	145.666	70.9505	106.851
[truncated: 5,934 more rows]

## Sheet: Supplementary Fig. 2
moox-0		moox-2		moox-5		moox-10		moox-15
1201.71	10471.9	1201	2995.36	1201.11	1421.86	1201.82	1846.88	1201.82	2107.09
1200	10478.7	1199.3	3126.39	1199.41	1375.47	1200.11	1825.01	1200.11	2137.11
1198.29	10464.4	1197.59	3084.4	1197.71	1373.08	1198.41	1811.08	1198.41	2157.03
1196.59	10380.4	1195.89	3021	1196	1344.51	1196.71	1764.88	1196.71	2105.12
1194.88	10469	1194.18	3089.21	1194.29	1380.87	1195	1711.41	1195	2210.76
1193.18	10321.4	1192.48	3126.79	1192.59	1386.86	1193.29	1791.19	1193.29	2131.01
1191.47	10279.9	1190.77	3120.01	1190.88	1380.28	1191.59	1815.78	1191.59	2089.85
1189.76	10380.6	1189.06	3151.45	1189.18	1393.59	1189.88	1802.91	1189.88	2093.69
1188.05	10317.9	1187.36	3095.75	1187.47	1393.29	1188.18	1793.17	1188.18	2095.38
1186.35	10451.8	1185.65	3194.44	1185.76	1371.03	1186.47	1758.47	1186.47	2136.69
1184.64	10374	1183.94	3105.13	1184.05	1389.56	1184.76	1780.97	1184.76	2115.9
1182.93	9987.62	1182.23	3131.97	1182.35	1383	1183.05	1813.85	1183.05	2120.8
1181.22	10245.6	1180.52	3099.22	1180.64	1402.56	1181.35	1790.6	1181.35	2112.86
1179.51	10198	1178.81	3057.33	1178.93	1413.75	1179.64	1746.58	1179.64	2101.71
1177.8	10180.7	1177.11	2951.33	1177.22	1452.11	1177.93	1777.37	1177.93	2098.05
1176.09	10269.2	1175.39	3114.03	1175.51	1384.95	1176.22	1765.57	1176.22	2188.48
1174.38	10146.2	1173.69	3055.38	1173.8	1400.32	1174.51	1788.04	1174.51	2099.3
1172.67	9854.02	1171.97	3050.15	1172.09	1400.02	1172.8	1758.59	1172.8	2096.71
1170.96	10220.4	1170.26	3110.52	1170.38	1428.95	1171.09	1794.54	1171.09	2022.55
1169.25	10151.8	1168.55	3086.98	1168.67	1418.21	1169.38	1830.48	1169.38	2087.27
1167.54	10276.4	1166.84	3010.08	1166.96	1415.82	1167.67	1768.88	1167.67	2059.06
1165.83	10096.1	1165.13	3067.37	1165.25	1424.91	1165.96	1795.47	1165.96	2044.74
1164.11	9988.37	1163.42	3030.13	1163.54	1406.87	1164.25	1782.64	1164.25	2049.64
1162.4	10028.5	1161.7	2992.91	1161.83	1406.57	1162.54	1804.03	1162.54	2056.68
1160.69	9941.89	1159.99	3121.78	1160.11	1419.82	1160.83	1757	1160.83	2040.23
1158.97	9969.92	1158.28	3075.41	1158.4	1399.72	1159.11	1763.88	1159.11	2063.27
1157.26	10190.9	1156.56	3053.44	1156.69	1397.34	1157.4	1765.58	1157.4	2055.36
1155.54	9941.56	1154.85	3019.29	1154.97	1430.38	1155.69	1792.14	1155.69	2075.19
1153.83	9891.21	1153.13	3085.62	1153.26	1399.87	1153.97	1794.86	1153.97	2073.68
1152.12	9880.07	1151.42	2983	1151.54	1408.94	1152.26	1821.4	1152.26	2054.05
1150.4	10094.9	1149.71	3063.01	1149.83	1422.17	1150.54	1739.23	1150.54	2069.6
1148.68	9866.81	1147.99	2952.82	1148.12	1330.27	1148.83	1732.65	1148.83	2015.88
1146.97	9831.59	1146.27	3035.84	1146.4	1502.74	1147.12	1789.19	1147.12	2100.67
1145.25	9615.74	1144.56	3029.11	1144.68	1438.95	1145.4	1839.51	1145.4	2033.13
1143.53	9580.58	1142.84	3011.74	1142.97	1433.44	1143.68	1798.77	1143.68	2095.52
1141.82	9635.71	1141.12	3033.9	1141.25	1431.06	1141.97	1790.12	1141.97	2088.68
1140.1	9591.53	1139.4	3144.19	1139.53	1402.68	1140.25	1768.02	1140.25	2015.86
1138.38	9857.2	1137.69	3069.07	1137.82	1462.67	1138.53	1795.55	1138.53	2021.82
1136.66	9704.72	1135.97	3010.69	1136.1	1411.43	1136.82	1826.18	1136.82	2006.49
1134.94	9588.4	1134.25	3067.76	1134.38	1422.56	1135.1	1742.09	1135.1	2057.12
1133.22	9628.43	1132.53	3036.74	1132.66	1404.6	1133.38	1807.83	1133.38	2071.57
1131.51	9482.12	1130.81	3066.45	1130.94	1425.07	1131.66	1817.78	1131.66	2076.44
1129.79	9699.44	1129.09	3043.03	1129.22	1414.38	1129.94	1835.98	1129.94	2033.48
1128.06	9454.04	1127.37	2969.54	1127.51	1443.15	1128.22	1786.03	1128.22	2006.47
1126.34	9554.14	1125.65	3018.97	1125.79	1408.59	1126.51	1766.04	1126.51	2032.61
1124.62	9579.12	1123.93	3007.71	1124.06	1446.69	1124.79	1769.79	1124.79	2026.86
1122.9	9468.99	1122.21	2966.12	1122.34	1436	1123.06	1774.57	1123.06	1985.01
1121.18	9397.94	1120.49	2954.88	1120.62	1456.44	1121.34	1732.93	1121.34	2000.51
1119.46	9410.93	1118.77	3031.55	1118.9	1405.31	1119.62	1778.97	1119.62	2066.97
1117.74	9513.93	1117.04	3006.66	1117.18	1461	1117.9	1788.9	1117.9	2064.4
1116.01	9439.91	1115.32	2924.2	1115.46	1382.94	1116.18	1770.99	1116.18	1989.68
1114.29	9323.93	1113.6	2959.93	1113.74	1455.2	1114.46	1810.81	1114.46	2024.27
1112.57	9498.84	1111.88	2922.95	1112.01	1392.71	1112.74	1790.84	1112.74	2049.29
1110.84	9313.95	1110.15	3049.51	1110.29	1483.58	1111.01	1798.7	1111.01	2007.49
1109.12	9299.97	1108.43	2988.31	1108.57	1462.55	1109.29	1695.32	1109.29	2073.86
1107.39	9570.65	1106.7	2969.51	1106.84	1444.63	1107.57	1766.01	1107.57	1992.86
1105.67	9460.76	1104.98	2991.57	1105.12	1392.56	1105.84	1797.55	1105.84	1994.55
1103.94	9464.73	1103.25	2957.65	1103.39	1410.89	1104.12	1726.14	1104.12	2059.82
1102.22	9226.14	1101.53	3032.64	1101.67	1411.62	1102.39	1802.95	1102.39	1998.99
1100.49	9278.05	1099.8	2969.99	1099.94	1447.54	1100.67	1790.22	1100.67	2040.93
1098.77	9261.1	1098.08	2925.51	1098.22	1425.5	1098.94	1797.04	1098.94	2035.2
1097.04	9217.22	1096.35	2958.14	1096.49	1409.68	1097.22	1839.85	1097.22	1975.48
1095.31	9322.96	1094.62	2966.57	1094.77	1502.45	1095.49	1778.79	1095.49	2063.97
1093.58	9300.03	1092.89	2964.43	1093.04	1431.83	1093.77	1768.13	1093.77	2005.32
1091.86	9351.87	1091.17	2933.58	1091.31	1443.92	1092.04	1747.2	1092.04	1965.75
1090.13	9176.45	1089.44	3031.12	1089.58	1457.05	1090.31	1778.68	1090.31	2003.41
1088.4	9258.19	1087.71	3024.43	1087.86	1456.74	1088.58	1788.57	1088.58	2004.04
1086.67	9205.4	1085.98	2978.5	1086.13	1449.19	1086.86	1809.76	1086.86	1987.75
1084.94	9272.16	1084.25	2943.15	1084.4	1430.29	1085.13	1784.72	1085.13	1982.04
1083.21	9243.28	1082.52	2996.84	1082.67	1485.74	1083.4	1777.16	1083.4	1979.5
1081.48	9477.27	1080.79	2978.1	1080.94	1432.78	1081.67	1718.27	1081.67	2047.76
1079.75	9299.05	1079.06	2989.52	1079.21	1467.56	1079.94	1777.42	1079.94	2046.26
1078.02	9025.37	1077.33	2940.63	1077.48	1511.62	1078.21	1806.8	1078.21	1986.68
1076.29	9220.45	1075.6	2977.69	1075.75	1440.11	1076.48	1796.15	1076.48	2015.82
1074.55	9093.13	1073.87	2949.92	1074.02	1436.71	1074.75	1791.66	1074.75	1957.32
1072.82	9207.55	1072.14	2952.3	1072.29	1453.93	1073.02	1783.08	1073.02	2012.85
1071.09	9369.64	1070.4	2987.83	1070.55	1457.74	1071.29	1755.02	1071.29	1982.87
1069.36	9322.9	1068.67	2990.2	1068.82	1444.03	1069.55	1708.52	1069.55	1996.16
1067.62	9374.57	1066.94	2941.37	1067.09	1443.72	1067.82	1765.54	1067.82	2014.72
1065.89	9104.26	1065.21	3031.08	1065.36	1450.63	1066.09	1821.51	1066.09	1987.92
1064.16	9221.53	1063.47	3056.03	1063.62	1440.01	1064.36	1764.78	1064.36	2036
1062.42	9127.18	1061.74	2942.49	1061.89	1435.59	1062.62	1806.39	1062.62	1983.91
1060.69	9113.31	1060	2872.64	1060.16	1505.29	1060.89	1772.22	1060.89	1989.81
1058.95	8941.58	1058.27	3046.54	1058.42	1458.65	1059.16	1720.66	1059.16	1959.88
1057.22	9070.69	1056.53	3080.48	1056.69	1488.18	1057.42	1797.04	1057.42	1964.72
1055.48	9259.29	1054.8	3025.69	1054.95	1450.82	1055.69	1808.93	1055.69	1952.72
1053.75	9013.22	1053.06	2999.48	1053.22	1414.5	1053.95	1724.67	1053.95	2003.9
1052.01	9029.15	1051.32	2979.29	1051.48	1435.8	1052.22	1762.14	1052.22	1975.04
1050.27	9178.96	1049.59	2915.54	1049.75	1409.78	1050.48	1797.55	1050.48	1923.04
1048.54	8933.06	1047.85	2952.47	1048.01	1438.27	1048.75	1775.69	1048.75	1966.83
1046.8	8975.76	1046.11	3001.41	1046.27	1442.07	1047.01	1780.42	1047.01	1944.31
1045.06	8872.73	1044.38	2909.15	1044.54	1467.45	1045.27	1766.76	1045.27	1934.43
1043.32	8965.96	1042.64	2941.57	1042.8	1471.25	1043.54	1769.44	1043.54	2008.68
1041.58	8836.24	1040.9	2985.97	1041.06	1469.9	1041.8	1800.73	1041.8	1940.96
1039.84	8941.31	1039.16	2980.83	1039.32	1481.91	1040.06	1764.6	1040.06	1992.05
1038.11	8980.99	1037.42	2950.18	1037.58	1522.67	1038.32	1808.12	1038.32	1980.06
1036.37	8881.04	1035.68	2996.05	1035.84	1523.37	1036.58	1800.59	1036.58	2008.01
1034.62	8879.14	1033.94	3040.41	1034.11	1492.25	1034.84	1792.04	1034.84	1966.61
1032.88	8927.71	1032.2	3021.76	1032.37	1497.06	1033.11	1814.1	1033.11	1990.34
1031.14	8893.14	1030.46	3025.61	1030.62	1544.95	1031.37	1842.27	1031.37	2048.72
1029.4	8914.97	1028.72	2988.98	1028.88	1528.21	1029.62	1827.6	1029.62	2018.89
1027.66	8740.97	1026.98	3048.29	1027.14	1495.07	1027.88	1807.84	1027.88	2052.04
1025.92	8762.82	1025.23	3025.16	1025.4	1523.46	1026.14	1851.28	1026.14	1967.65
1024.18	9024.9	1023.49	3069.45	1023.66	1531.33	1024.4	1914.08	1024.4	2027.03
1022.43	8922.14	1021.75	3097.25	1021.92	1512.55	1022.66	1864.75	1022.66	1995.13
1020.69	8917.26	1020.01	3148.99	1020.18	1560.38	1020.92	1850.09	1020.92	2006.23
1018.95	8918.31	1018.26	3209.7	1018.43	1590.78	1019.18	1853.77	1019.18	2067.66
1017.2	8892.69	1016.52	3328.75	1016.69	1592.48	1017.43	1921.6	1017.43	2082.94
1015.46	9077.43	1014.78	3441.76	1014.95	1675.08	1015.69	1981.25	1015.69	2151.67
1013.71	9336.13	1013.03	3635.51	1013.2	1743.3	1013.95	2038.85	1013.95	2143.87
1011.97	9378.54	1011.29	3808.24	1011.46	1864.72	1012.2	2065.89	1012.2	2252.36
1010.22	9412.06	1009.54	4158.85	1009.71	1932.87	1010.46	2240.45	1010.46	2264.45
1008.48	9907.33	1007.79	4564.64	1007.97	2073.63	1008.71	2297.95	1008.71	2327.84
1006.73	10929.2	1006.05	5128.69	1006.22	2404.57	1006.97	2463.23	1006.97	2466.58
1004.98	13370.8	1004.3	5891.28	1004.48	2669.92	1005.22	2721.99	1005.22	2648.18
1003.24	19056.4	1002.56	7133.16	1002.73	3017.97	1003.48	3161.59	1003.48	2999.23
1001.49	25073.8	1000.81	9708.51	1000.98	3845.24	1001.73	3623.35	1001.73	3538.46
999.742	25033	999.061	14355.8	999.236	5308.81	999.982	4717.98	999.982	4323.27
997.994	19079.6	997.314	18448.5	997.488	8472.86	998.236	7078	998.236	6416.06
996.244	13099.3	995.564	17931	995.742	12788.8	996.488	12352.1	996.488	10672.3
994.496	10667.5	993.816	13009.2	993.994	15212.5	994.742	19169.5	994.742	16181.2
992.746	9843.86	992.068	8364.02	992.244	12903.8	992.994	21477.2	992.994	17777.8
990.998	9815.16	990.318	6070.63	990.496	8315.52	991.244	16855	991.244	14139.8
989.248	9585.67	988.568	5080.39	988.746	5045.8	989.496	10246.8	989.496	8801.5
987.496	9497.98	986.818	4630.42	986.998	3508.04	987.746	6103.97	987.746	5544.01
985.746	9256.85	985.068	4370	985.248	2850.3	985.998	4354.84	985.998	4048.52
983.994	9552.92	983.316	4117.14	983.496	2596.75	984.248	3610.5	984.248	3448.38
982.244	9515.46	981.564	3941.89	981.746	2323.93	982.496	3201.1	982.496	3142.85
980.492	9239.07	979.814	3793.53	979.994	2228.61	980.746	2927.71	980.746	2931.38
978.74	9269.53	978.062	3689.93	978.244	2168	978.994	2769.98	978.994	2812.85
976.986	9249.84	976.309	3639.99	976.492	1989.2	977.244	2566.72	977.244	2660.99
975.234	9094.56	974.557	3630.27	974.74	1966.35	975.492	2472.97	975.492	2637.48
973.48	9431.54	972.803	3508.9	972.986	1977.13	973.74	2436.98	973.74	2478.42
971.727	9005.19	971.049	3412.89	971.234	1908.48	971.986	2335.19	971.986	2378.86
969.973	9103.42	969.295	3461.26	969.48	1843.92	970.234	2261.79	970.234	2386.68
968.219	8986.58	967.541	3365.3	967.727	1741.73	968.48	2195.51	968.48	2383.04
966.463	8860.97	965.787	3386.89	965.973	1795.29	966.727	2173.79	966.727	2325.23
964.707	8803.12	964.031	3302.88	964.219	1680.94	964.973	2134.87	964.973	2282.03
962.953	8901.3	962.275	3284.33	962.463	1684.65	963.219	2092.94	963.219	2297.16
961.195	8628.64	960.52	3231.59	960.707	1742.26	961.463	2058.1	961.463	2218.58
959.439	8776.84	958.764	3241.3	958.953	1683.93	959.707	2044.51	959.707	2270.15
957.684	8801.42	957.008	3292.61	957.195	1701.86	957.953	2017.79	957.953	2189.53
955.926	8823.05	955.25	3275.56	955.439	1687.27	956.195	2018.37	956.195	2217.15
954.168	8782.93	953.492	3270.39	953.684	1652.35	954.439	1994.69	954.439	2220.83
952.41	8701.66	951.736	3256.33	951.926	1708.89	952.684	2039.72	952.684	2194.35
950.652	8855.56	949.977	3286.8	950.168	1658.75	950.926	2020.09	950.926	2186.6
948.895	8888.91	948.219	3352.88	948.41	1703.08	949.168	2036.82	949.168	2247.46
947.135	8740.11	946.461	3344.74	946.652	1713.88	947.41	1975.81	947.41	2207.49
945.375	8661.86	944.701	3257.97	944.895	1720.62	945.652	2087.43	945.652	2230.91
943.615	8806.82	942.941	3353.68	943.135	1735.47	943.895	2010.28	943.895	2205.5
941.855	8702.16	941.182	3378.17	941.375	1695.52	942.135	2087.54	942.135	2225.79
940.094	8870.53	939.42	3417.47	939.615	1726.61	940.375	2059.85	940.375	2223.24
938.334	8636.78	937.66	3354.48	937.855	1691.75	938.615	2135.05	938.615	2280.9
936.572	8661.33	935.898	3420.44	936.094	1783.66	936.855	2057.95	936.855	2299.09
934.811	8559.72	934.137	3387.11	934.334	1783.28	935.094	2107.91	935.094	2233.21
933.049	8769.04	932.375	3427.86	932.572	1766.67	933.334	2110.48	933.334	2317.81
931.285	8828.72	930.613	3440.45	930.811	1779.47	931.572	2093.91	931.572	2279.97
929.523	8604.02	928.85	3464.88	929.049	1812.52	929.811	2107.56	929.811	2296.07
927.76	8807.33	927.088	3475.97	927.285	1791.87	928.049	2150.41	928.049	2321.49
925.996	8471.38	925.324	3621.75	925.523	1816.8	926.285	2119.74	926.285	2286.79
924.232	8689.27	923.561	3609.13	923.76	1834.63	924.523	2132.37	924.523	2323.6
922.469	8702.04	921.797	3618.71	921.996	1875.74	922.76	2197.34	922.76	2336.57
920.703	8729.45	920.031	3520.31	920.232	1902.66	920.996	2120.38	920.996	2346.43
918.938	8601.67	918.266	3596.45	918.469	1865.82	919.232	2187.34	919.232	2398.74
917.172	8699.34	916.502	3663.68	916.703	1906.9	917.469	2226.09	917.469	2354.73
915.406	8419.45	914.736	3730.88	914.938	1867.04	915.703	2184.38	915.703	2389.43
913.641	8569.77	912.969	3611.85	913.172	1869.67	913.938	2228.15	913.938	2325.77
911.873	8643.98	911.203	3673.13	911.406	1967.33	912.172	2164.34	912.172	2407.02
910.107	8536.83	909.436	3676.77	909.641	1854.71	910.406	2211.11	910.406	2434.44
908.34	8467.73	907.668	3780.83	907.873	1960.42	908.641	2318.15	908.641	2467.01
906.572	8878.09	905.9	3892.23	906.107	1982.22	906.873	2300.57	906.873	2415.8
904.803	8513.76	904.133	3984.4	904.34	2045.43	905.107	2302.08	905.107	2409.08
903.035	8640.49	902.365	3980.59	902.572	2020.75	903.34	2312.63	903.34	2470.58
901.266	8591.88	900.596	3919.23	900.803	2024.35	901.572	2322.17	901.572	2481.42
899.496	8721.46	898.826	4055.58	899.035	2115.77	899.803	2397.95	899.803	2468.48
897.727	8646.57	897.057	4004.56	897.266	2152.66	898.035	2368.33	898.035	2522.7
895.957	8635.95	895.287	4052.35	895.496	2196.59	896.266	2385.88	896.266	2541.78
894.186	8502.73	893.518	4125.2	893.727	2139.62	894.496	2420.47	894.496	2536.07
892.416	8608.87	891.746	4252.54	891.957	2190.6	892.727	2523.25	892.727	2514.87
890.645	8764.56	889.975	4230.99	890.186	2276.84	890.957	2511.67	890.957	2593.8
888.873	8721.83	888.205	4305.22	888.416	2282.4	889.186	2545.21	889.186	2627.3
887.102	8594.54	886.432	4391.2	886.645	2275.86	887.416	2573.73	887.416	2694.82
885.328	8750.13	884.66	4385.83	884.873	2477.91	885.645	2590.21	885.645	2672.58
883.555	8722.01	882.887	4582.19	883.102	2442.12	883.873	2659.77	883.873	2714.28
881.783	8938.71	881.115	4575.31	881.328	2540.3	882.102	2694.25	882.102	2709.57
880.01	8890.15	879.342	4709.73	879.555	2549.82	880.328	2805.82	880.328	2745.07
878.234	8958.15	877.568	4866.16	877.783	2606.66	878.555	2757.16	878.555	2736.23
876.461	8886.31	875.793	4882.76	876.01	2613.14	876.783	2969.77	876.783	2910.8
874.686	8881.47	874.02	4909.65	874.234	2747.43	875.01	2897.07	875.01	2915.32
872.91	9106.64	872.244	5011.52	872.461	2751.87	873.234	3023.51	873.234	2885.85
871.135	9168.7	870.469	5248.61	870.686	2939.38	871.461	3039.86	871.461	3018.06
869.359	9038.68	868.693	5235.72	868.91	3058.43	869.686	3167.21	869.686	3034.91
867.584	9374.22	866.918	5512.33	867.135	3125.14	867.91	3178.52	867.91	3073.36
865.807	9229.66	865.141	5683.04	865.359	3185.79	866.135	3366.77	866.135	3203.39
864.029	9405.06	863.363	5825.77	863.584	3348.92	864.359	3428	864.359	3302.49
862.252	9725.76	861.586	6084.45	861.807	3488.88	862.584	3597.13	862.584	3389.2
860.475	9744.01	859.809	6347.43	860.029	3723.21	860.807	3729.21	860.807	3467.66
858.697	10044.2	858.031	6514.87	858.252	3854.99	859.029	3910.18	859.029	3561.49
856.918	10047.8	856.252	6925.87	856.475	4053.99	857.252	4148.99	857.252	3773.5
855.139	10408.7	854.475	7286.8	854.697	4365.36	855.475	4319.8	855.475	3892.93
853.359	10766.6	852.695	7744.4	852.918	4634.43	853.697	4640.26	853.697	4139.71
851.58	10773	850.916	8354.34	851.139	4987.68	851.918	4973.56	851.918	4408.98
849.801	11235.2	849.135	8889.23	849.359	5414.02	850.139	5327.66	850.139	4613.43
848.02	11845.2	847.355	9533.84	847.58	5831.16	848.359	5712.53	848.359	4917.4
846.238	12434.6	845.574	10296.9	845.801	6458.71	846.58	6112.19	846.58	5273.58
844.457	13157.2	843.793	11446.5	844.02	7227.38	844.801	6775.89	844.801	5764.07
842.676	14456.8	842.012	12667.4	842.238	8006.74	843.02	7494.13	843.02	6274.87
840.895	15346.8	840.23	14318.4	840.457	8942.12	841.238	8275.84	841.238	6821.35
839.111	16700.4	838.447	16119.5	838.676	10171.7	839.457	9330.23	839.457	7635.3
837.328	19027.4	836.666	18608.1	836.895	11717.3	837.676	10500.7	837.676	8521.71
835.545	22193.8	834.883	21328.2	835.111	13484.6	835.895	12162.7	835.895	9719.42
833.762	26772.8	833.1	24902	833.328	15814.9	834.111	13986.2	834.111	11065.2
831.979	34452.4	831.314	29434	831.545	18613.7	832.328	16397.4	832.328	12949.5
830.193	44509.4	829.531	33937.7	829.762	22371.3	830.545	19561.9	830.545	15204.9
828.41	57880.4	827.746	38680.8	827.979	26213.3	828.762	23300.2	828.762	18185.6
826.625	70235.2	825.961	42494.8	826.193	30355.7	826.979	27777.1	826.979	21340.1
824.838	77623.7	824.176	45079	824.41	34318.4	825.193	32648	825.193	25143.4
823.053	75439.5	822.391	45371.8	822.625	37153.2	823.41	37083.1	823.41	28303.3
821.266	66208.6	820.605	44036.6	820.838	38133	821.625	40374.9	821.625	30668.5
819.48	53308.3	818.818	40811.4	819.053	37178	819.838	41594.8	819.838	31479.5
817.693	41735.1	817.031	36877.7	817.266	34986.2	818.053	40388.2	818.053	30459.8
815.906	32433.7	815.244	32788	815.48	31362.5	816.266	36918.8	816.266	28006.7
814.117	26446	813.457	28895.7	813.693	27869.1	814.48	32958.2	814.48	24918.5
812.33	22284.5	811.668	25621.1	811.906	24486.2	812.693	28770.8	812.693	21761.1
810.541	19381.7	809.881	22540.6	810.117	21501.2	810.906	24837.5	810.906	18808.5
808.752	17242.7	808.092	20298.9	808.33	18616.3	809.117	21382.4	809.117	16345.7
806.963	15561	806.303	18348.5	806.541	16319.5	807.33	18447.8	807.33	14322.3
805.174	14264	804.514	16703.7	804.752	14562.6	805.541	16027.6	805.541	12551
803.383	13392	802.723	15233.2	802.963	12924.2	803.752	14264.2	803.752	11029.6
801.592	12497.3	800.932	14304.2	801.174	11661.6	801.963	12694.9	801.963	9927.57
799.801	11931.9	799.143	13327.5	799.383	10576	800.174	11599.3	800.174	9107.74
798.01	11580.2	797.352	12600.4	797.592	9703.31	798.383	10639.1	798.383	8303.57
796.219	11185.4	795.559	11812.4	795.801	9013.39	796.592	9529.6	796.592	7708.93
794.426	10839.8	793.768	11139.8	794.01	8449.34	794.801	8874.46	794.801	7237.99
792.633	10736.6	791.975	10761.7	792.219	7857.63	793.01	8289.95	793.01	6808.05
790.842	10443.1	790.182	10123.1	790.426	7357.83	791.219	7733.43	791.219	6439.47
789.047	10132.5	788.389	9803.55	788.633	7086.33	789.426	7398.99	789.426	6116.93
787.254	9948.76	786.596	9456.52	786.842	6741.25	787.633	7008.25	787.633	5789.44
785.461	9966.76	784.803	9060.16	785.047	6303.74	785.842	6684.01	785.842	5523.23
783.666	9817.72	783.008	8937.46	783.254	6116.25	784.047	6404.45	784.047	5356.98
781.871	9657.23	781.213	8487.58	781.461	5804.45	782.254	6021.11	782.254	5173.49
780.076	9764.52	779.418	8263.27	779.666	5556.46	780.461	5831.84	780.461	4988.04
778.279	9575.32	777.623	8068.13	777.871	5427.93	778.666	5678.26	778.666	4775.18
776.484	9423.61	775.826	7942.83	776.076	5028.97	776.871	5456.51	776.871	4623.48
774.688	9315.12	774.031	7590.91	774.279	4947.34	775.076	5145.88	775.076	4513.58
772.891	9246.95	772.234	7420.74	772.484	4815.06	773.279	5089.41	773.279	4287.74
771.094	9193.18	770.438	7241.93	770.688	4631.15	771.484	4866.94	771.484	4195.25
769.297	9251.55	768.641	7079.17	768.891	4556.62	769.688	4726.58	769.688	4134.33
767.498	9071.33	766.842	7006.49	767.094	4439.4	767.891	4668.26	767.891	4057.17
765.699	8988.9	765.043	6768.37	765.297	4259.67	766.094	4454.92	766.094	3899.73
763.9	9119.1	763.246	6835.11	763.498	4246.82	764.297	4299.92	764.297	3888.72
762.102	9030.95	761.447	6859.74	761.699	4117.84	762.498	4231.86	762.498	3764.92
760.303	8813.6	759.646	6645.01	759.9	3955.16	760.699	4210.22	760.699	3766.13
758.502	8808.81	757.848	6383.97	758.102	3947.36	758.9	4057.35	758.9	3678.97
756.703	8924.59	756.047	6349.24	756.303	3890.94	757.102	3991.36	757.102	3514.68
754.902	8842.29	754.246	6217.39	754.502	3716.52	755.303	3957.94	755.303	3538.28
753.102	8734.2	752.445	6172.56	752.703	3729.59	753.502	3917.64	753.502	3491.83
751.299	8603.21	750.645	6119.05	750.902	3633.61	751.703	3821.16	751.703	3377.41
749.498	8721.79	748.844	6009.07	749.102	3637.77	749.902	3762.17	749.902	3417.26
747.695	8754.31	747.041	5894.79	747.299	3531.93	748.102	3748.54	748.102	3415.5
745.893	8617.66	745.238	5886.27	745.498	3414.25	746.299	3653.15	746.299	3304.21
744.09	8684.57	743.436	5805.36	743.695	3431.34	744.498	3645.46	744.498	3254.82
742.287	8645.43	741.633	5708.57	741.893	3407.81	742.695	3558.01	742.695	3246
740.482	8569.06	739.828	5723.25	740.09	3335.78	740.893	3519.82	740.893	3189.55
738.678	8481.26	738.025	5684.38	738.287	3315.26	739.09	3458.02	739.09	3212.17
736.873	8608.28	736.221	5636.86	736.482	3243.28	737.287	3499.59	737.287	3094.96
735.068	8569.19	734.416	5473.66	734.678	3203.98	735.482	3416.18	735.482	3130.75
733.264	8421.34	732.611	5460.9	732.873	3180.53	733.678	3343.62	733.678	3106.78
731.457	8602.66	730.805	5381.66	731.068	3148.19	731.873	3313.39	731.873	3037.26
729.652	8134.41	728.998	5455.64	729.264	3155.41	730.068	3253.67	730.068	3028.5
727.846	8604.63	727.193	5360.53	727.457	3113.2	728.264	3190.05	728.264	2982.3
726.037	8402.56	725.387	5392.59	725.652	3081.88	726.457	3267	726.457	2996.83
724.23	8483.65	723.578	5329.31	723.846	2963.62	724.652	3197.5	724.652	2896.03
722.422	8338.87	721.771	5224.18	722.037	3053.87	722.846	3129.02	722.846	2907.54
720.615	8342.77	719.963	5182.62	720.23	2941.58	721.037	3117.53	721.037	2981.73
718.807	8320.95	718.154	5257.99	718.422	2978.47	719.23	3020.62	719.23	2926.49
716.998	8310.56	716.346	5274.16	716.615	2961.03	717.422	3135.81	717.422	2910.69
715.188	8502.97	714.537	5192.22	714.807	2998.89	715.615	3155.74	715.615	2874.69
713.379	8372.62	712.727	5212.72	712.998	2926.19	713.807	3105.98	713.807	2834.67
711.568	8322.26	710.918	5153.91	711.188	2924.56	711.998	3052.32	711.998	2847.18
709.758	8397.51	709.107	5181.62	709.379	2969.3	710.188	3110.51	710.188	2792.03
707.947	8461.32	707.297	5196.34	707.568	2861.15	708.379	3011.76	708.379	2882.28
706.135	8242.64	705.486	5111.63	705.758	2883.21	706.568	3049.35	706.568	2911.93
704.324	8303.59	703.674	5159.5	703.947	2861.88	704.758	3034.96	704.758	2865.89
702.512	8370.23	701.861	5184.3	702.135	2874.07	702.947	3095.06	702.947	2844.08
700.699	8428.28	700.049	5273.9	700.324	2965.08	701.135	3069.89	701.135	2823.28
698.887	8318.11	698.236	5292.91	698.512	2973.3	699.324	3092.73	699.324	2932.59
697.072	8587.05	696.424	5160.76	696.699	2947.05	697.512	3052.88	697.512	2903.72
695.26	8570.93	694.611	5297.8	694.887	2978.9	695.699	3146.22	695.699	2856.72
693.445	8589	692.797	5300.96	693.072	2946.74	693.887	3102.46	693.887	2999.2
691.631	8524.47	690.982	5416.33	691.26	3014.02	692.072	3222.17	692.072	3031.8
689.816	8830.14	689.168	5405.08	689.445	3105.87	690.26	3254.74	690.26	2970.69
688	9147.06	687.354	5523.25	687.631	3061.9	688.445	3344.04	688.445	3064.72
686.186	9142.22	685.537	5716.13	685.816	3253.05	686.631	3371.67	686.631	3076.13
684.369	9330.88	683.721	5842.8	684	3274.96	684.816	3432.55	684.816	3205.32
682.553	9610.5	681.904	6018.28	682.186	3384.37	683	3529.57	683	3240.86
680.736	10282.5	680.088	6251.15	680.369	3468.17	681.186	3787.84	681.186	3325.68
678.918	10812.1	678.271	6402.05	678.553	3665.95	679.369	3865.2	679.369	3437.63
677.102	11657	676.453	6677.81	676.736	3876.41	677.553	4123.28	677.553	3691.35
675.283	12822.7	674.637	7074.06	674.918	4089.73	675.736	4333.38	675.736	3964.07
673.465	13601.4	672.818	7319.42	673.102	4358.93	673.918	4627.38	673.918	4098.93
671.646	14149.7	671	7551.75	671.283	4700.69	672.102	4969.1	672.102	4302.08
669.826	14166.5	669.18	7705.06	669.465	4952.95	670.283	5433.68	670.283	4765.42
668.008	13513	667.361	7798.06	667.646	5064.75	668.465	5647.22	668.465	4908.06
666.188	12817.2	665.541	7988.54	665.826	5325.66	666.646	6126.08	666.646	5219.39
664.367	11778.3	663.721	7780.31	664.008	5258.76	664.826	6187.18	664.826	5484.38
662.545	11199.5	661.9	7486.16	662.188	5281.15	663.008	6202.41	663.008	5339.6
660.725	10317.4	660.08	7222.24	660.367	5188.79	661.188	5999.19	661.188	5217.97
658.902	9713.75	658.258	7057.3	658.545	4926.86	659.367	5879.91	659.367	5150.59
657.08	9399.63	656.436	6633.13	656.725	4663.07	657.545	5602.78	657.545	4819.35
655.258	9255.79	654.613	6416.83	654.902	4377.84	655.725	5234.16	655.725	4569.51
653.436	8961.75	652.791	6224.97	653.08	4082.94	653.902	4855.96	653.902	4295.7
651.613	8611.15	650.969	5964.47	651.258	3987.02	652.08	4562.67	652.08	4007.98
649.789	8589.43	649.145	5762.77	649.436	3719.75	650.258	4289.96	650.258	3797.57
647.965	8550.72	647.32	5724.3	647.613	3631.79	648.436	4082.6	648.436	3588.26
646.141	8356.23	645.496	5730.2	645.789	3452.83	646.613	3924.01	646.613	3533.36
644.316	8419.54	643.672	5361.33	643.965	3312.11	644.789	3826.8	644.789	3359.27
642.49	8426.19	641.848	5268.62	642.141	3232.12	642.965	3544.75	642.965	3285.41
640.666	8356.41	640.021	5135.93	640.316	3108.15	641.141	3430.16	641.141	3180.55
638.84	8060.24	638.195	5169.11	638.49	3033.13	639.316	3380.78	639.316	3074.72
637.014	8253.72	636.369	5012.2	636.666	2978.68	637.49	3246.82	637.49	2982.96
635.186	8079.35	634.543	4913.94	634.84	2943.81	635.666	3264.58	635.666	2967.3
633.359	7995.56	632.717	4811.43	633.014	2890.38	633.84	3168.62	633.84	2948.64
631.531	8030.57	630.889	4856.09	631.186	2825.25	632.014	3107.67	632.014	2911.98
629.703	8107.97	629.061	4902.15	629.359	2792.39	630.186	3073.96	630.186	2857.34
627.875	8032.71	627.232	4826.83	627.531	2727.31	628.359	3042.21	628.359	2876.71
626.047	8059.21	625.404	4723.01	625.703	2664.21	626.531	3037.65	626.531	2825.09
624.217	7820.13	623.574	4731.97	623.875	2696.82	624.703	2988.44	624.703	2769.51
622.387	7829.71	621.746	4683.85	622.047	2668.9	622.875	2901.4	622.875	2776.89
620.557	7912.72	619.916	4677.12	620.217	2676.12	621.047	2893	621.047	2765.3
618.727	7744.41	618.086	4639.02	618.387	2613.09	619.217	2922.45	619.217	2749.71
616.896	7694.72	616.256	4424.14	616.557	2623.25	617.387	2824.8	617.387	2665.23
615.064	7851.08	614.424	4484.46	614.727	2585.61	615.557	2804.78	615.557	2641.68
613.232	7804.21	612.594	4459.25	612.896	2549.94	613.727	2793.5	613.727	2649.09
611.4	7847.64	610.762	4520.97	611.064	2517.21	611.896	2716.31	611.896	2614.58
609.568	7803.61	608.93	4460.15	609.232	2520.56	610.064	2765.14	610.064	2556.14
607.736	7728.59	607.096	4379.41	607.4	2475.18	608.232	2740.31	608.232	2557.57
605.902	7712.8	605.264	4285.9	605.568	2438.59	606.4	2700.96	606.4	2585.93
604.068	7620.93	603.43	4317.7	603.736	2430.26	604.568	2680.03	604.568	2585.37
602.234	7720.69	601.596	4268.37	601.902	2452.13	602.736	2680.41	602.736	2525.99
600.4	7642.94	599.762	4280.24	600.068	2415.56	600.902	2712.74	600.902	2510.48
598.566	7570.85	597.928	4240.89	598.234	2351.76	599.068	2636.65	599.068	2482.03
596.73	7614.25	596.092	4282.63	596.4	2420.35	597.234	2614.78	597.234	2503.41
594.895	7682.96	594.256	4184.99	594.566	2383.81	595.4	2583.25	595.4	2469.99
593.059	7557.43	592.42	4178.39	592.73	2369.67	593.566	2591.38	593.566	2436.59
591.223	7519.19	590.584	4161.84	590.895	2335.11	591.73	2539.56	591.73	2468.91
589.387	7691.97	588.748	4125.4	589.059	2318.07	589.895	2517.73	589.895	2481.3
587.549	7614.34	586.91	4194.11	587.223	2285.48	588.059	2562.61	588.059	2458.87
585.711	7545.18	585.074	4126.43	585.387	2278.18	586.223	2587.18	586.223	2469.27
583.873	7498.53	583.236	4107.06	583.549	2292.25	584.387	2490.95	584.387	2446.85
582.035	7685.23	581.396	4162.95	581.711	2298.55	582.549	2497.17	582.549	2479.13
580.195	7380.02	579.559	4062.67	579.873	2275.71	580.711	2462.82	580.711	2411.97
578.357	7496.41	577.719	4070.3	578.035	2234.42	578.873	2523.11	578.873	2344.85
576.518	7424.54	575.881	4048.12	576.195	2241.7	577.035	2475.25	577.035	2439.73
574.678	7448.18	574.041	3980.56	574.357	2248.97	575.195	2469.89	575.195	2376.6
572.836	7480.24	572.199	3983.94	572.518	2230.04	573.357	2467.41	573.357	2420.78
570.996	7512.29	570.359	3957.54	570.678	2154.85	571.518	2418.63	571.518	2366.62
569.154	7409.6	568.518	3972.27	568.836	2216.45	569.678	2422.93	569.678	2355.18
567.312	7528.63	566.678	4006.83	566.996	2226.63	567.836	2406	567.836	2335.8
565.471	7636.39	564.836	3983.28	565.154	2171.85	565.996	2437.29	565.996	2390.87
563.629	7323.38	562.992	3959.73	563.312	2186.88	564.154	2433.86	564.154	2343.71
561.785	7436.74	561.15	3954.62	561.471	2164.11	562.312	2360.09	562.312	2390.81
559.941	7289.32	559.307	3962.24	559.629	2190.77	560.471	2384.62	560.471	2312.92
558.098	7352.19	557.463	3908.99	557.785	2169.94	558.629	2404.32	558.629	2347.12
556.254	7300.13	555.619	3809.05	555.941	2192.71	556.785	2412.46	556.785	2326.78
554.41	7329.35	553.775	3860.57	554.098	2146.72	554.941	2392.68	554.941	2304.46
552.564	7380.96	551.93	3888.02	552.254	2166.58	553.098	2360.38	553.098	2322.78
550.719	7387.74	550.086	3963.55	550.41	2124.48	551.254	2378.15	551.254	2291.56
548.873	7212.52	548.24	3836.81	548.564	2192.72	549.41	2317.01	549.41	2258.37
547.027	7367.7	546.395	3828.9	546.719	2119.68	547.564	2348.25	547.564	2307.39
545.182	7458.43	544.547	3902.98	544.873	2117.28	545.719	2343.88	545.719	2290.05
543.334	7190.98	542.701	3820.15	543.027	2138.09	543.873	2382.79	543.873	2238.08
541.486	7329.27	540.854	3798.12	541.182	2138.58	542.027	2375.54	542.027	2291.02
539.639	7380.8	539.006	3913.12	539.334	2084.95	540.182	2296.2	540.182	2296.46
537.791	7250.55	537.158	3862.83	537.486	2088.36	538.334	2337.98	538.334	2259.35
535.943	7349.6	535.311	3743.37	535.639	2089.83	536.486	2329.78	536.486	2250.94
534.094	7336.8	533.461	3844.19	533.791	2101.93	534.639	2326.39	534.639	2291.98
532.244	7268.12	531.611	3843.34	531.943	2128.51	532.791	2277.86	532.791	2276.64
530.395	7210.65	529.762	3807.22	530.094	2114.52	530.943	2306.16	530.943	2272.19
528.545	7301.24	527.912	3939	528.244	2114.06	529.094	2307.57	529.094	2218.33
526.693	7282.88	526.062	3822.47	526.395	2154.13	527.244	2310.91	527.244	2276.13
524.842	7365.03	524.211	3886.5	524.545	2062.95	525.395	2357.41	525.395	2326
522.99	7140.11	522.359	3781.31	522.693	2063.46	523.545	2305.09	523.545	2290.93
521.139	7266.91	520.508	3788.94	520.842	2113.16	521.693	2328.56	521.693	2289.44
519.287	7189.98	518.656	3797.97	518.99	2062.56	519.842	2313.67	519.842	2220.83
517.434	7157.71	516.805	3935.21	517.139	2112.23	517.99	2303.57	517.99	2260.8
515.582	7340.2	514.951	3873.77	515.287	2041.41	516.139	2368.24	516.139	2273.13
513.729	7126.68	513.098	3863.06	513.434	2058.3	514.287	2253.69	514.287	2281.51
511.875	7058.21	511.244	3777.73	511.582	2088.68	512.434	2269.48	512.434	2231.7
510.02	7293.55	509.391	3789.57	509.729	2059.32	510.582	2268.02	510.582	2335.71
508.166	7160.98	507.535	3823.92	507.875	2061.76	508.729	2279.01	508.729	2254.37
506.311	7131.55	505.682	3778.05	506.02	2095	506.875	2391.48	506.875	2282.45
504.455	7316.58	503.826	3872.88	504.166	2114.76	505.02	2344.05	505.02	2257.32
502.6	7292.69	501.969	3860.77	502.311	2184.54	503.166	2339.71	503.166	2259.78
500.742	7068.37	500.113	3921.8	500.455	2142.69	501.311	2311.45	501.311	2300.64
498.887	7334.01	498.258	3897.03	498.6	2142.22	499.455	2334.85	499.455	2326.72
497.029	7056.91	496.4	3956.61	496.742	2121.55	497.6	2349.64	497.6	2319.32
495.172	7330.78	494.543	3957.15	494.887	2151.85	495.742	2404.58	495.742	2356.21
493.312	7426.52	492.686	4084.12	493.029	2183.1	493.887	2393.53	493.887	2336.99
491.455	7397.07	490.826	4045.3	491.172	2293.14	492.029	2451.3	492.029	2410.26
489.596	7473.29	488.969	4058.45	489.312	2254.2	490.172	2425.92	490.172	2418.58
487.736	7388.25	487.109	4056.15	487.455	2246.02	488.312	2462.64	488.312	2383.63
485.877	7411.64	485.25	4202.64	485.596	2278.18	486.455	2510.8	486.455	2493.22
484.018	7546.14	483.391	4253.64	483.736	2323.77	484.596	2577.09	484.596	2512.33
482.156	7530.59	481.529	4339.69	481.877	2358.78	482.736	2629.02	482.736	2506.86
480.297	7776.1	479.67	4293.85	480.018	2366.9	480.877	2621.76	480.877	2560.34
478.436	7749.4	477.809	4344.79	478.156	2410.52	479.018	2735.69	479.018	2612.82
476.574	7800.43	475.947	4454.6	476.297	2486.74	477.156	2783.74	477.156	2604.39
474.711	7770.96	474.086	4511.1	474.436	2503.45	475.297	2798.39	475.297	2670.58
472.85	7766.47	472.223	4529.72	472.574	2518.24	473.436	2825.42	473.436	2636.62
470.986	7845.2	470.359	4556.75	470.711	2528.24	471.574	2876.28	471.574	2753.8
469.123	7854.57	468.496	4655.21	468.85	2581.36	469.711	2778.43	469.711	2664.89
467.26	7420.26	466.633	4600.96	466.986	2645.95	467.85	2822.6	467.85	2718.25
465.395	7654.27	464.77	4576.14	465.123	2542.85	465.986	2865.8	465.986	2705.89
463.531	7347.7	462.906	4727.73	463.26	2553.78	464.123	2876.6	464.123	2699.41
461.666	7576.07	461.041	4721.08	461.395	2630.79	462.26	2849.3	462.26	2715.47
459.801	7272.42	459.176	4753.63	459.531	2615.85	460.395	2793.45	460.395	2722.72
457.934	7309.59	457.311	4836.52	457.666	2585.6	458.531	2862.32	458.531	2659.4
456.068	7280.29	455.443	4734.74	455.801	2531.43	456.666	2810.3	456.666	2617.67
454.201	7314.67	453.578	4715.52	453.934	2527.05	454.801	2776.38	454.801	2667.04
452.334	7340.74	451.711	4755.02	452.068	2519.79	452.934	2805.26	452.934	2639.04
450.467	7197.98	449.844	4714.83	450.201	2533.58	451.068	2757.08	451.068	2581.67
448.6	7149.36	447.977	4708.2	448.334	2511.99	449.201	2696.57	449.201	2608.51
446.73	7228	446.107	4682.01	446.467	2483.71	447.334	2693.13	447.334	2606.95
444.863	7157.26	444.24	4736.86	444.6	2489.85	445.467	2635.51	445.467	2489.95
442.994	7114.21	442.371	4551.46	442.73	2452.99	443.6	2680.53	443.6	2565.7
441.125	7165.16	440.502	4648.19	440.863	2459.13	441.73	2677.09	441.73	2542.64
439.254	7182.92	438.631	4627.62	438.994	2396.5	439.863	2605.27	439.863	2570.43
437.385	7095.68	436.762	4548.45	437.125	2457.09	437.994	2573.35	437.994	2566.93
435.514	7088.58	434.891	4458.14	435.254	2426	436.125	2628.8	436.125	2497.95
433.643	7045.59	433.02	4500.4	433.385	2477.01	434.254	2612.08	434.254	2503.26
431.771	7160	431.148	4489.64	431.514	2324.72	432.385	2664.65	432.385	2566.21
429.898	7020.39	429.277	4520.72	429.643	2392.9	430.514	2521.75	430.514	2518.76
428.025	7239.64	427.404	4493.23	427.771	2335.14	428.643	2491.79	428.643	2588.51
426.154	6984.17	425.533	4518.72	425.898	2343.21	426.771	2582.27	426.771	2605.51
424.281	7139.88	423.66	4480.1	424.025	2395.13	424.898	2648.07	424.898	2566.87
422.406	7207.26	421.785	4438.71	422.154	2326.92	423.025	2587.77	423.025	2585.82
420.533	7087.09	419.912	4401.51	420.281	2328.31	421.154	2600.46	421.154	2555.98
418.658	7231.64	418.037	4468.77	418.406	2424.99	419.281	2564.83	419.281	2579.8
416.783	7122.54	416.164	4466.39	416.533	2343.48	417.406	2607.84	417.406	2535.34
414.908	6939.08	414.289	4450.09	414.658	2433.44	415.533	2562.75	415.533	2605.95
413.033	7224.09	412.412	4397.62	412.783	2389.1	413.658	2622.78	413.658	2631.69
411.156	7272.07	410.537	4513.52	410.908	2425.7	411.783	2634.51	411.783	2637.93
409.279	7174.08	408.66	4447.14	409.033	2398.51	409.908	2571.46	409.908	2652.94
407.402	7175.24	406.783	4574.1	407.156	2470.3	408.033	2555.75	408.033	2629.95
405.525	7242.47	404.906	4546.67	405.279	2455.48	406.156	2634.65	406.156	2602.1
403.648	7213.35	403.029	4630.46	403.402	2461.6	404.279	2652.04	404.279	2661.89
401.77	7203.5	401.15	4676.69	401.525	2450.59	402.402	2691.17	402.402	2649.62
399.891	7210.16	399.273	4683.99	399.648	2508.05	400.525	2771.88	400.525	2686.99
398.012	7277.32	397.395	4755.19	397.77	2568.33	398.648	2808.12	398.648	2715.58
396.133	7575.42	395.516	4802.75	395.891	2638.08	396.77	2836.8	396.77	2768.48
394.254	7686.46	393.635	4972.48	394.012	2650.8	394.891	2921.2	394.891	2795.1
392.373	7728.73	391.756	5074.11	392.133	2773.7	393.012	2944.16	393.012	2842.12
390.492	8001.81	389.875	5326.99	390.254	2851.91	391.133	3078.55	391.133	2893.99
388.611	8442.35	387.994	5556.16	388.373	3012.69	389.254	3200.61	389.254	3033.3
386.73	9324.9	386.113	5872.63	386.492	3175.29	387.373	3434.94	387.373	3243.49
384.848	9753.96	384.23	6201.44	384.611	3530.49	385.492	3689.92	385.492	3413.75
382.965	9787.49	382.35	6591.13	382.73	3776.4	383.611	4035.37	383.611	3741.28
381.082	9573.97	380.467	6797.63	380.848	4099.05	381.73	4529.71	381.73	3970.58
379.199	9086.12	378.584	6866.82	378.965	4287.83	379.848	5062.49	379.848	4445.41
377.316	8850.9	376.699	6708.7	377.082	4357.99	377.965	5244.29	377.965	4589.04
375.432	8508.81	374.816	6511.86	375.199	4336.17	376.082	5223.33	376.082	4629.75
373.547	8380.77	372.932	6518.72	373.316	4189.25	374.199	5011.06	374.199	4429.84
371.662	8403.59	371.047	6306.78	371.432	4167.48	372.316	4796.06	372.316	4267.85
369.777	8256.45	369.162	6356.61	369.547	4033.92	370.432	4518.04	370.432	4100.1
367.893	8240.91	367.277	6373.19	367.662	3983.77	368.547	4393.66	368.547	4041.99
366.006	8332.24	365.391	6273.52	365.777	4022.66	366.662	4284.4	366.662	3797.8
364.119	8086.59	363.504	6265.21	363.893	3937.51	364.777	4164.83	364.777	3786.29
362.232	8183.4	361.617	6230.62	362.006	3885.52	362.893	4124.37	362.893	3734.1
360.346	8337.66	359.73	6216.79	360.119	3809.9	361.006	4022.77	361.006	3667.41
358.457	8333.07	357.844	6151.81	358.232	3682.28	359.119	3873.23	359.119	3520.36
356.568	8186.16	355.955	6252.74	356.346	3634.17	357.232	3807.48	357.232	3466.32
354.68	8055.74	354.066	6316.32	354.457	3527.44	355.346	3774.66	355.346	3415.21
352.791	8302.9	352.178	6334.26	352.568	3588.12	353.457	3762.54	353.457	3360.26
350.902	8673.04	350.289	6827.44	350.68	3684.68	351.568	3725.99	351.568	3357.58
349.012	9483.26	348.398	7280.34	348.791	3833.19	349.68	3752.41	349.68	3485.5
347.121	11323.8	346.51	8257.78	346.902	4266.03	347.791	4013.71	347.791	3535.98
345.23	14270.5	344.619	9407.36	345.012	4843.2	345.902	4319.98	345.902	3833.02
343.34	16202.1	342.729	11172	343.121	5706.29	344.012	5004.58	344.012	4305.88
341.449	15053.7	340.836	12410.2	341.23	6992	342.121	5994.03	342.121	5101.34
339.557	12458.2	338.945	12393.6	339.34	8436.69	340.23	7507.77	340.23	6221.13
337.664	9964.92	337.053	11359.1	337.449	9077.55	338.34	8857.54	338.34	7199.38
335.771	8687.68	335.16	10043.7	335.557	8666.01	336.449	9323.78	336.449	7535.84
333.879	8374.57	333.268	8781.29	333.664	7473.53	334.557	8632.22	334.557	7016.57
331.984	8127.1	331.373	7999.14	331.771	6291.01	332.664	7440.14	332.664	6141.27
330.09	8141.66	329.479	7509.5	329.879	5401.33	330.771	6143.58	330.771	5171.77
328.195	7801.6	327.586	7192.31	327.984	4880.67	328.879	5415.68	328.879	4538.53
326.301	7870.78	325.691	6832.55	326.09	4484.66	326.984	4796.83	326.984	4162.21
324.406	7904.47	323.795	6789.72	324.195	4244.31	325.09	4477.18	325.09	3890.23
322.51	7829.12	321.9	6796.47	322.301	4158.57	323.195	4301.93	323.195	3784.25
320.613	7680.2	320.004	6766.05	320.406	4006	321.301	4138.94	321.301	3642.64
318.717	7836.54	318.107	6647.56	318.51	3889.28	319.406	4145.51	319.406	3629.3
316.82	7981.9	316.211	6633.7	316.613	3949.61	317.51	4105.27	317.51	3566.81
314.924	7966.51	314.314	6683.13	314.717	3963.8	315.613	3948.04	315.613	3522.66
313.025	8204.36	312.416	6794.42	312.82	3967.62	313.717	4099.7	313.717	3635.55
311.127	8229.76	310.518	6874.04	310.924	4028.84	311.82	4098.79	311.82	3579.84
309.229	8524.6	308.619	7089.73	309.025	4085.32	309.924	4096.94	309.924	3736.96
307.33	9056.06	306.721	7233.85	307.127	4227.36	308.025	4296.16	308.025	3745.76
305.43	9736.91	304.82	7579.9	305.229	4377.8	306.127	4432.64	306.127	3946.08
303.529	11146.4	302.922	8100.29	303.33	4640.04	304.229	4710.21	304.229	4083.76
301.629	13920.4	301.021	8772.9	301.43	4989.57	302.33	5056.82	302.33	4381.09
299.729	17122.7	299.121	9824.23	299.529	5430.08	300.43	5506.98	300.43	4804.27
297.828	20565.5	297.219	11068.7	297.629	6182.28	298.529	6124.14	298.529	5259.97
295.926	22669.7	295.318	13037.3	295.729	7261.93	296.629	7093.13	296.629	5951.96
294.023	22026.2	293.416	15226	293.828	8560.83	294.729	8320.31	294.729	6978.13
292.121	20141.6	291.514	16707.2	291.926	10247.8	292.828	10057.6	292.828	8480.48
290.219	18760.3	289.611	18562.2	290.023	12104.8	290.926	12364.3	290.926	10128.2
288.314	17249.2	287.709	19524.9	288.121	13593.2	289.023	14533.8	289.023	11661.8
286.41	15423.9	285.805	20171.8	286.219	15020	287.121	16031.6	287.121	12797.2
284.508	13971.2	283.9	20183.8	284.314	15938.6	285.219	16791.9	285.219	13440.5
282.602	12644	281.996	19185.7	282.41	16525.8	283.314	17222.7	283.314	13611.3
280.697	11670.1	280.092	17409.7	280.508	16329	281.41	17200.2	281.41	13422.1
278.791	11106.1	278.186	15478.4	278.602	14996.3	279.508	16136.6	279.508	12668.8
276.887	10252.2	276.281	13476.7	276.697	13161.8	277.602	14539.6	277.602	11394.9
274.98	9892.06	274.375	12089.4	274.791	11221.4	275.697	12437.4	275.697	9808.08
273.072	9385.74	272.467	10664.3	272.887	9348.26	273.791	10540.1	273.791	8268.9
271.166	8944.68	270.561	9724.42	270.98	7972.35	271.887	8816.81	271.887	7069.76
269.258	8492.98	268.652	9080.49	269.072	6914.45	269.98	7563.56	269.98	6273.67
267.35	8136.28	266.746	8490.2	267.166	6233.32	268.072	6690.64	268.072	5598.67
265.441	8231.95	264.838	8151.84	265.258	5709.72	266.166	6093.57	266.166	5068.62
263.533	8249.06	262.928	7888.84	263.35	5224.71	264.258	5472.57	264.258	4613.52
261.623	8536.84	261.02	7668.34	261.441	4991.55	262.35	5206.25	262.35	4391.3
259.713	8694.6	259.109	7554.55	259.533	4774.4	260.441	4909.35	260.441	4236.19
257.803	9417.72	257.199	7503.67	257.623	4544.25	258.533	4669.31	258.533	4060.09
255.893	10305.5	255.289	7394.06	255.713	4489.96	256.623	4589.26	256.623	3979.76
253.982	11430.9	253.379	7478.47	253.803	4456.24	254.713	4640.28	254.713	3860.25
252.07	12547.7	251.467	7550.54	251.893	4434.69	252.803	4513.81	252.803	3969.38
250.158	12755.7	249.557	7800.08	249.982	4581.31	250.893	4642.85	250.893	4005.79
248.246	12115.1	247.645	8053.6	248.07	4702.64	248.982	4754.2	248.982	4155
246.334	10956	245.732	8392.98	246.158	4888.35	247.07	5030.77	247.07	4279.29
244.42	10005.4	243.818	8882.3	244.246	5232.68	245.158	5424.18	245.158	4527.75
242.508	9417.14	241.904	8974.44	242.334	5526.46	243.246	5868.47	243.246	4912.73
240.594	8696.83	239.992	8908.34	240.42	5626.01	241.334	6229.97	241.334	5294.67
238.68	8171.2	238.078	8553.21	238.508	5908.37	239.42	6482.77	239.42	5444.37
236.764	7805.03	236.162	8372.72	236.594	5657.08	237.508	6707.63	237.508	5480.4
234.85	7897.73	234.248	7825.7	234.68	5526.19	235.594	6460.41	235.594	5260.58
232.934	8001.18	232.332	7436.98	232.764	5162.28	233.68	6052.9	233.68	5075.22
231.018	7867.24	230.416	7101.56	230.85	4868.45	231.764	5533.43	231.764	4731.55
229.1	8229.5	228.5	6842.56	228.934	4529.08	229.85	5106.86	229.85	4325.08
227.184	8408.28	226.584	6655.85	227.018	4297.94	227.934	4821.29	227.934	4216.34
225.266	8468.39	224.666	6643.47	225.1	4255.06	226.018	4577.54	226.018	3960.82
223.348	8396.44	222.748	6776.73	223.184	4153.53	224.1	4432.06	224.1	3846.49
221.43	8133.25	220.83	6900.41	221.266	4160.05	222.184	4345.89	222.184	3852.31
219.512	7654.7	218.912	7037.63	219.348	4221.49	220.266	4345.84	220.266	3882.89
217.592	7262.53	216.992	7027.9	217.43	4400.17	218.348	4457.78	218.348	3926.8
215.672	6881.3	215.074	6928.42	215.512	4639.24	216.43	4632.57	216.43	4042.12
213.752	6995.51	213.154	6667.2	213.592	4687.51	214.512	4720.34	214.512	4175.48
211.832	6727.53	211.234	6268.82	211.672	4527.43	212.592	4739.63	212.592	4149.8
209.912	6758.32	209.312	6180.44	209.752	4188.89	210.672	4517.59	210.672	3931.86
207.99	7176.42	207.393	6157.33	207.832	3973.21	208.752	4232.8	208.752	3874.84
206.068	7166.75	205.471	6241.52	205.912	3862.65	206.832	3976.77	206.832	3717.95
204.146	7651.78	203.549	6620.38	203.99	3852.49	204.912	3867.78	204.912	3522.13
202.225	7972.63	201.627	7224.44	202.068	4073.66	202.99	3911.26	202.99	3616.44
200.301	7530.12	199.703	7909.68	200.146	4602.17	201.068	4241.94	201.068	3702.15

## Sheet: Supplementary Fig. 7a
moox-0		moox-2		moox-5		moox-10		moox-15
3460	-8.28544	3460	39.5314	3460	62.6354	3460	6.5977	3460	20.4515
3460.1	12.0629	3460.1	77.4808	3460.1	93.6299	3460.1	2.61391	3460.1	112.897
3460.2	7.33066	3460.2	97.3272	3460.2	99.8183	3460.2	-33.8773	3460.2	118.133
3460.29	2.15804	3460.29	-55.429	3460.29	-62.8978	3460.29	-55.8742	3460.29	-71.4384
3460.39	-21.4149	3460.39	73.0134	3460.39	18.783	3460.39	-53.2747	3460.39	-64.8141
3460.49	-15.3078	3460.49	130.755	3460.49	101.963	3460.49	-55.8767	3460.49	5.40848
3460.59	-8.38076	3460.59	268.697	3460.59	25.5431	3460.59	23.5221	3460.59	113.532
3460.68	17.6065	3460.68	100.841	3460.68	114.526	3460.68	113.824	3460.68	-119.441
3460.78	40.8742	3460.78	129.186	3460.78	16.4126	3460.78	33.9307	3460.78	-14.7073
3460.88	9.60228	3460.88	-5.7657	3460.88	137.805	3460.88	101.944	3460.88	-43.1654
3460.98	3.41098	3460.98	-5.11393	3460.98	11.8038	3460.98	93.6658	3460.98	-70.0134
3461.08	26.8403	3461.08	-165.758	3461.08	-72.2899	3461.08	182.297	3461.08	2.44998
3461.17	39.6504	3461.17	-65.2985	3461.17	-194.876	3461.17	83.2369	3461.17	19.4255
3461.27	37.5611	3461.27	101.865	3461.27	-273.454	3461.27	5.38714	3461.27	-86.3867
3461.37	45.9926	3461.37	243.733	3461.37	-158.024	3461.37	-38.1533	3461.37	8.11273
3461.47	-2.45543	3461.47	261.105	3461.47	-59.7873	3461.47	-2.68522	3461.47	-25.8772
3461.56	-30.9829	3461.56	158.68	3461.56	-4.94478	3461.56	-4.20994	3461.56	-69.8581
3461.66	-1.06994	3461.66	94.7566	3461.66	59.6023	3461.66	-40.5291	3461.66	54.768
3461.76	5.72326	3461.76	153.235	3461.76	-17.4477	3461.76	137.755	3461.76	208.099
3461.86	-3.60342	3461.86	-42.5856	3461.86	-55.3964	3461.86	161.142	3461.86	-58.3687
3461.96	-26.8501	3461.96	32.2933	3461.96	175.354	3461.96	-38.273	3461.96	-185.137
3462.05	-49.0771	3462.05	-79.4289	3462.05	235.303	3462.05	-69.9903	3462.05	-33.1085
3462.15	-14.8844	3462.15	45.5468	3462.15	168.347	3462.15	49.8875	3462.15	209.414
3462.25	-14.7721	3462.25	88.4196	3462.25	143.587	3462.25	146.659	3462.25	236.728
3462.35	-25.9205	3462.35	139.189	3462.35	147.119	3462.35	64.0215	3462.35	91.3312
3462.44	0.73052	3462.44	98.3543	3462.44	54.3438	3462.44	-33.425	3462.44	138.923
3462.54	4.52078	3462.54	178.515	3462.54	-1.7396	3462.54	-79.6816	3462.54	-26.1976
3462.64	-23.0897	3462.64	159.072	3462.64	137.069	3462.64	43.9515	3462.64	-93.9313
3462.74	-10.5609	3462.74	57.8244	3462.74	90.8686	3462.74	90.0745	3462.74	96.6225
3462.83	-15.0128	3462.83	132.073	3462.83	63.0609	3462.83	14.8881	3462.83	39.5644
3462.93	-47.3652	3462.93	17.0176	3462.93	39.8465	3462.93	-92.5066	3462.93	37.596
3463.03	6.00182	3463.03	-75.9405	3463.03	-126.673	3463.03	30.6919	3463.03	81.9192
3463.13	-2.23149	3463.13	81.0994	3463.13	-48.7972	3463.13	141.386	3463.13	75.8363
3463.23	7.47501	3463.23	179.938	3463.23	-79.9235	3463.23	154.976	3463.23	-66.6503
3463.32	9.08145	3463.32	-12.6236	3463.32	18.9498	3463.32	2.86636	3463.32	117.062
3463.42	-3.03199	3463.42	85.8153	3463.42	109.424	3463.42	-16.242	3463.42	-21.5232
3463.52	5.17482	3463.52	15.1559	3463.52	146.402	3463.52	1.85319	3463.52	-132.104
3463.62	18.842	3463.62	-66.6012	3463.62	76.9837	3463.62	-52.646	3463.62	-159.878
3463.71	18.5898	3463.71	-158.655	3463.71	-75.9284	3463.71	38.9622	3463.71	155.157
3463.81	54.4181	3463.81	190.095	3463.81	46.0665	3463.81	-55.9211	3463.81	51.703
3463.91	46.6671	3463.91	11.8483	3463.91	197.169	3463.91	138.105	3463.91	58.1608
3464.01	26.2169	3464.01	-11.2937	3464.01	254.28	3464.01	85.4414	3464.01	-142.569
3464.11	-18.9726	3464.11	76.5685	3464.11	-30.7013	3464.11	-143.512	3464.11	73.9138
3464.2	-23.3415	3464.2	-28.0652	3464.2	-57.7747	3464.2	221.143	3464.2	81.9084
3464.3	-15.1898	3464.3	61.1047	3464.3	52.6588	3464.3	345.407	3464.3	-125.086
3464.4	-11.8775	3464.4	-28.2223	3464.4	-99.9019	3464.4	386.179	3464.4	-5.67218
3464.5	-26.6048	3464.5	-51.8471	3464.5	-115.458	3464.5	404.956	3464.5	-37.8511
3464.59	-12.1719	3464.59	-133.87	3464.59	-155.611	3464.59	204.136	3464.59	-99.1256
3464.69	-7.81892	3464.69	113.107	3464.69	-102.864	3464.69	62.4178	3464.69	-15.6984
3464.79	-9.50597	3464.79	150.684	3464.79	18.9835	3464.79	-10.8012	3464.79	-43.5721
3464.89	3.50677	3464.89	-28.74	3464.89	207.128	3464.89	-21.5231	3464.89	-238.949
3464.99	-7.70084	3464.99	48.6337	3464.99	244.869	3464.99	110.65	3464.99	-306.033
3465.08	17.1911	3465.08	-10.6954	3465.08	-156.596	3465.08	-42.1835	3465.08	-70.425
3465.18	-15.7376	3465.18	226.572	3465.18	-50.867	3465.18	-41.2252	3465.18	167.773
3465.28	-12.0069	3465.28	56.0354	3465.28	160.754	3465.28	-89.8762	3465.28	7.05908
3465.38	49.383	3465.38	-166.005	3465.38	189.467	3465.38	-117.137	3465.38	-193.467
3465.47	19.1322	3465.47	-128.05	3465.47	-59.2277	3465.47	69.3921	3465.47	-124.806
3465.57	25.4008	3465.57	38.2005	3465.57	-95.6306	3465.57	46.6115	3465.57	13.8437
3465.67	47.6687	3465.67	33.2475	3465.67	-50.0408	3465.67	-22.378	3465.67	-57.9182
3465.77	38.9761	3465.77	-7.00873	3465.77	17.7428	3465.77	-136.675	3465.77	29.7103
3465.86	-1.57702	3465.86	97.0324	3465.86	128.921	3465.86	40.2215	3465.86	86.2312
3465.96	28.6496	3465.96	-2.52821	3465.96	89.4966	3465.96	90.6139	3465.96	58.9467
3466.06	8.13605	3466.06	-4.68978	3466.06	-69.23	3466.06	112.004	3466.06	125.46
3466.16	37.3825	3466.16	-79.2513	3466.16	30.1434	3466.16	132.695	3466.16	134.072
3466.26	21.9691	3466.26	19.3881	3466.26	-116.781	3466.26	14.2871	3466.26	57.0882
3466.35	12.4961	3466.35	189.929	3466.35	-58.1026	3466.35	-31.116	3466.35	-3.09065
3466.45	19.8035	3466.45	193.673	3466.45	-8.71868	3466.45	-20.3128	3466.45	-1.8617
3466.55	6.4714	3466.55	203.621	3466.55	29.3716	3466.55	-203.402	3466.55	-201.423
3466.65	32.32	3466.65	-55.3283	3466.65	78.4693	3466.65	-31.7816	3466.65	-28.0727
3466.74	39.8493	3466.74	165.127	3466.74	-46.2249	3466.74	-112.452	3466.74	-72.9101
3466.84	-12.6806	3466.84	52.8869	3466.84	-67.7108	3466.84	-98.8111	3466.84	-4.73456
3466.94	42.2501	3466.94	-72.149	3466.94	-221.888	3466.94	303.24	3466.94	-44.4463
3467.04	13.0416	3467.04	95.5192	3467.04	-111.758	3467.04	91.4998	3467.04	230.654
3467.14	13.1937	3467.14	72.6911	3467.14	-30.7207	3467.14	99.6686	3467.14	81.3651
3467.23	-1.41373	3467.23	-74.034	3467.23	-150.078	3467.23	127.045	3467.23	-21.3148
3467.33	-20.3208	3467.33	41.3433	3467.33	-97.4301	3467.33	-41.3739	3467.33	33.712
3467.43	-34.3675	3467.43	-9.47801	3467.43	-78.6798	3467.43	-100.289	3467.43	-11.0569
3467.53	23.2658	3467.53	-83.4988	3467.53	77.2715	3467.53	28.8971	3467.53	29.0757
3467.62	25.7791	3467.62	-23.1199	3467.62	-97.0779	3467.62	2.58234	3467.62	40.6073
3467.72	43.5921	3467.72	-21.3424	3467.72	7.4702	3467.72	-57.9355	3467.72	3.13495
3467.82	32.6048	3467.82	15.933	3467.82	92.8142	3467.82	154.242	3467.82	17.8563
3467.92	10.5569	3467.92	121.506	3467.92	128.353	3467.92	136.212	3467.92	-139.531
3468.02	1.32854	3468.02	-8.62544	3468.02	136.084	3468.02	-57.026	3468.02	-88.3281
3468.11	8.15949	3468.11	-30.6603	3468.11	228.609	3468.11	-12.973	3468.11	-54.3369
3468.21	7.38974	3468.21	-42.6993	3468.21	158.825	3468.21	-5.92969	3468.21	25.4422
3468.31	-4.1407	3468.31	-35.4425	3468.31	-36.7661	3468.31	29.1038	3468.31	-41.7909
3468.41	14.0682	3468.41	37.0104	3468.41	-112.365	3468.41	3.72801	3468.41	-42.1356
3468.5	36.2365	3468.5	63.1597	3468.5	-168.971	3468.5	255.044	3468.5	-160.791
3468.6	6.90423	3468.6	-91.5941	3468.6	-85.3828	3468.6	316.552	3468.6	-61.8553
3468.7	21.0116	3468.7	54.9497	3468.7	40.1009	3468.7	-58.1447	3468.7	52.3735
3468.8	13.7187	3468.8	143.992	3468.8	-69.8182	3468.8	-25.8452	3468.8	-188.502
3468.9	8.32573	3468.9	-56.0662	3468.9	-36.7385	3468.9	-33.7472	3468.9	-102.98
3468.99	-17.5472	3468.99	-58.4241	3468.99	-71.0581	3468.99	-28.3483	3468.99	-77.8561
3469.09	-19.7599	3469.09	20.2193	3469.09	-120.775	3469.09	6.85349	3469.09	70.6712
3469.19	3.80774	3469.19	79.8648	3469.19	73.3116	3469.19	236.16	3469.19	277.805
3469.29	9.05589	3469.29	201.013	3469.29	-43.1958	3469.29	122.674	3469.29	0.04721
3469.38	-12.9954	3469.38	167.965	3469.38	-197.996	3469.38	198.597	3469.38	-3.39978
3469.48	-23.8859	3469.48	128.222	3469.48	39.0111	3469.48	127.529	3469.48	-34.0346
3469.58	3.0643	3469.58	178.382	3469.58	243.027	3469.58	-76.2286	3469.58	-4.95637
3469.68	11.5353	3469.68	56.1476	3469.68	137.552	3469.68	-208.175	3469.68	65.1353
3469.78	-14.173	3469.78	105.017	3469.78	62.085	3469.78	-125.211	3469.78	-224.26
3469.87	-14.1806	3469.87	174.991	3469.87	84.9263	3469.87	-8.13756	3469.87	-113.643
3469.97	-11.2675	3469.97	38.4691	3469.97	304.975	3469.97	91.045	3469.97	117.986
3470.07	-18.6139	3470.07	157.75	3470.07	-24.8711	3470.07	14.9347	3470.07	-184.577
3470.17	-17	3470.17	-52.8671	3470.17	104.688	3470.17	129.03	3470.17	-114.133
3470.26	-5.76576	3470.26	149.117	3470.26	322.849	3470.26	77.9284	3470.26	-44.3852
3470.36	28.1485	3470.36	0.00245	3470.36	-32.3887	3470.36	-59.372	3470.36	124.664
3470.46	1.12274	3470.46	168.987	3470.46	61.3728	3470.46	-72.3733	3470.46	7.51268
3470.56	-19.3233	3470.56	64.0702	3470.56	137.832	3470.56	-179.178	3470.56	-125.143
3470.66	-14.0097	3470.66	51.3512	3470.66	-185.014	3470.66	-204.088	3470.66	34.1948
3470.75	8.36346	3470.75	81.5293	3470.75	29.7355	3470.75	-57.5042	3470.75	23.6241
3470.85	30.096	3470.85	123.404	3470.85	43.578	3470.85	-158.329	3470.85	-74.1569
3470.95	49.9479	3470.95	3.17463	3470.95	160.813	3470.95	142.937	3470.95	-10.3492
3471.05	3.89909	3471.05	-30.1587	3471.05	2.44036	3471.05	-45.8062	3471.05	6.84657
3471.14	-30.6104	3471.14	-72.2961	3471.14	148.76	3471.14	-29.2591	3471.14	-123.87
3471.24	-27.3405	3471.24	-11.1373	3471.24	124.772	3471.24	170.079	3471.24	134.603
3471.34	6.6288	3471.34	-63.7819	3471.34	-120.622	3471.34	135.109	3471.34	34.8657
3471.44	-5.04236	3471.44	-138.129	3471.44	90.7784	3471.44	85.6325	3471.44	-101.88
3471.53	18.4061	3471.53	24.4212	3471.53	-18.4252	3471.53	76.6511	3471.53	64.7683
3471.63	14.1344	3471.63	-127.33	3471.63	0.16891	3471.63	171.267	3471.63	-116.987
3471.73	4.34264	3471.73	-115.281	3471.73	170.062	3471.73	110.982	3471.73	80.3569
3471.83	-24.609	3471.83	-102.331	3471.83	74.2574	3471.83	147.699	3471.83	133.203
3471.93	6.49962	3471.93	-15.4795	3471.93	-190.045	3471.93	124.319	3471.93	150.853
3472.02	17.8887	3472.02	-101.926	3472.02	-147.042	3472.02	36.6458	3472.02	42.7116
3472.12	-6.06172	3472.12	-131.868	3472.12	-27.7325	3472.12	303.98	3472.12	156.18
3472.22	24.6086	3472.22	20.2927	3472.22	-61.5158	3472.22	23.1238	3472.22	120.959
3472.32	0.97958	3472.32	70.2583	3472.32	-132.791	3472.32	-34.0222	3472.32	14.9516
3472.41	-40.6286	3472.41	70.2286	3472.41	-22.2562	3472.41	-46.357	3472.41	-95.7419
3472.51	-18.136	3472.51	9.40372	3472.51	-85.0127	3472.51	-149.48	3472.51	90.9788
3472.61	-8.10255	3472.61	76.7836	3472.61	-14.4602	3472.61	-103.193	3472.61	33.5132
3472.71	-19.0484	3472.71	58.8677	3472.71	9.90055	3472.71	10.1048	3472.71	-99.7396
3472.81	-28.6336	3472.81	-60.2442	3472.81	103.769	3472.81	-18.6884	3472.81	65.0188
3472.9	-27.8783	3472.9	-30.153	3472.9	76.3428	3472.9	30.7258	3472.9	161.487
3473	-36.8826	3473	38.3405	3473	68.8214	3473	134.145	3473	109.361
3473.1	-18.1466	3473.1	27.6354	3473.1	202.603	3473.1	228.969	3473.1	-0.45998
3473.2	3.06944	3473.2	-148.669	3473.2	124.785	3473.2	213.593	3473.2	55.6203
3473.29	18.8854	3473.29	10.3259	3473.29	199.766	3473.29	1.2158	3473.29	87.0991
3473.39	28.0611	3473.39	200.619	3473.39	-7.55492	3473.39	123.736	3473.39	-56.9262
3473.49	25.9565	3473.49	113.111	3473.49	143.02	3473.49	226.05	3473.49	21.642
3473.59	-5.72866	3473.59	46.7992	3473.59	53.1884	3473.59	24.3578	3473.59	-131.098
3473.69	20.4656	3473.69	-74.7159	3473.69	-15.9494	3473.69	-13.4426	3473.69	-62.0489
3473.78	21.9593	3473.78	120.165	3473.78	-248.495	3473.78	-174.752	3473.78	62.7892
3473.88	44.6522	3473.88	43.2424	3473.88	-19.5472	3473.88	-122.671	3473.88	188.516
3473.98	-8.79549	3473.98	115.316	3473.98	76.5926	3473.98	-119.499	3473.98	226.031
3474.08	-29.5638	3474.08	10.8851	3474.08	73.0254	3474.08	-115.736	3474.08	243.635
3474.17	-14.0526	3474.17	-33.3485	3474.17	247.452	3474.17	167.02	3474.17	167.03
3474.27	-10.1219	3474.27	135.315	3474.27	208.874	3474.27	26.37	3474.27	-50.9831
3474.37	-18.7115	3474.37	39.7773	3474.37	226.292	3474.37	52.5158	3474.37	-63.601
3474.47	1.63878	3474.47	-78.5615	3474.47	165.609	3474.47	66.4595	3474.47	5.77867
3474.56	24.2491	3474.56	-87.8002	3474.56	167.326	3474.56	-52.7966	3474.56	161.559
3474.66	27.7196	3474.66	96.8621	3474.66	-29.9546	3474.66	-247.25	3474.66	75.8418
3474.76	24.4104	3474.76	30.6266	3474.76	65.8685	3474.76	-36.6986	3474.76	-39.3689
3474.86	-6.83827	3474.86	-12.406	3474.86	234.297	3474.86	174.26	3474.86	-6.37097
3474.96	1.49369	3474.96	0.56521	3474.96	175.133	3474.96	6.92693	3474.96	164.938
3475.05	12.2064	3475.05	4.74076	3475.05	302.677	3475.05	-45.6956	3475.05	82.5598
3475.15	37.0599	3475.15	-61.4788	3475.15	-25.269	3475.15	101.493	3475.15	-150.204
3475.25	13.3143	3475.25	-178.093	3475.25	69.5943	3475.25	167.494	3475.25	74.247
3475.35	-14.7905	3475.35	-194.503	3475.35	-23.6326	3475.35	85.607	3475.35	69.6131
3475.44	19.3656	3475.44	54.2929	3475.44	105.75	3475.44	-50.6683	3475.44	-68.5061
3475.54	5.68243	3475.54	136.093	3475.54	154.341	3475.54	-135.433	3475.54	-96.4118
3475.64	-15.3201	3475.64	-160.503	3475.64	1.64049	3475.64	-247.488	3475.64	10.4943
3475.74	-6.80198	3475.74	-140.795	3475.74	67.8459	3475.74	-97.8354	3475.74	-139.29
3475.84	30.5565	3475.84	-77.585	3475.84	-40.444	3475.84	56.923	3475.84	-158.767
3475.93	46.4952	3475.93	84.9265	3475.93	-44.7311	3475.93	78.8849	3475.93	-37.3396
3476.03	2.43408	3476.03	268.238	3476.03	66.8828	3476.03	1.548	3476.03	19.6893
3476.13	-1.68717	3476.13	285.25	3476.13	-105.804	3476.13	57.1101	3476.13	63.1169
3476.23	-8.38865	3476.23	-27.0398	3476.23	-13.8937	3476.23	202.169	3476.23	-7.85959
3476.32	-11.0505	3476.32	-12.8318	3476.32	-107.188	3476.32	188.622	3476.32	259.257
3476.42	3.36715	3476.42	11.8733	3476.42	20.8131	3476.42	175.069	3476.42	238.066
3476.52	-19.3358	3476.52	100.475	3476.52	-79.3928	3476.52	43.4079	3476.52	178.664
3476.62	-33.1793	3476.62	-113.527	3476.62	-104.606	3476.62	-91.5622	3476.62	209.452
3476.72	-16.9635	3476.72	-137.333	3476.72	-18.7264	3476.72	-289.141	3476.72	-55.5724
3476.81	-21.1084	3476.81	35.857	3476.81	-107.354	3476.81	-109.929	3476.81	-219.807
3476.91	-26.6138	3476.91	-42.4562	3476.91	49.8117	3476.91	-174.025	3476.91	-116.952
3477.01	15.2803	3477.01	-42.8723	3477.01	257.172	3477.01	178.072	3477.01	-89.3062
3477.11	36.9941	3477.11	2.50939	3477.11	267.828	3477.11	309.663	3477.11	76.8337
3477.2	6.76756	3477.2	-79.5103	3477.2	157.381	3477.2	-93.8479	3477.2	-158.031
3477.3	29.121	3477.3	-85.9304	3477.3	38.1338	3477.3	-84.5602	3477.3	-37.896
3477.4	3.23451	3477.4	25.4501	3477.4	119.988	3477.4	186.529	3477.4	-51.7597
3477.5	3.72831	3477.5	32.7322	3477.5	-76.2557	3477.5	120.322	3477.5	155.481
3477.6	-6.53745	3477.6	155.717	3477.6	-43.4939	3477.6	91.3206	3477.6	-78.5699
3477.69	-0.30263	3477.69	37.4051	3477.69	121.875	3477.69	-56.8721	3477.69	-55.0108
3477.79	35.3129	3477.79	132.498	3477.79	33.3513	3477.79	34.6452	3477.79	-2.33914
3477.89	24.8293	3477.89	156.995	3477.89	-15.3626	3477.89	-134.126	3477.89	-10.5529
3477.99	9.00659	3477.99	88.3979	3477.99	121.434	3477.99	-177.984	3477.99	148.549
3478.08	0.12482	3478.08	30.5064	3478.08	-153.359	3478.08	91.0705	3478.08	66.4674
3478.18	23.224	3478.18	-24.6796	3478.18	25.8587	3478.18	212.538	3478.18	15.6023
3478.28	49.4441	3478.28	-78.9601	3478.28	196.087	3478.28	103.519	3478.28	181.753
3478.38	15.785	3478.38	-93.2357	3478.38	114.724	3478.38	-12.2889	3478.38	174.818
3478.48	3.0666	3478.48	-43.807	3478.48	96.1702	3478.48	102.414	3478.48	-19.0038
3478.57	29.2488	3478.57	152.825	3478.57	-64.5771	3478.57	-168.876	3478.57	151.285
3478.67	30.9315	3478.67	324.56	3478.67	-61.8194	3478.67	-30.4587	3478.67	95.281
3478.77	5.19448	3478.77	80.1969	3478.77	-35.6585	3478.77	137.962	3478.77	187.882
3478.87	37.0776	3478.87	81.3342	3478.87	-82.9963	3478.87	141.685	3478.87	202.285
3478.96	17.0606	3478.96	-75.2289	3478.96	-78.1348	3478.96	149.306	3478.96	44.7872
3479.06	-17.5366	3479.06	94.0067	3479.06	-17.4758	3479.06	167.325	3479.06	184.685
3479.16	-31.9142	3479.16	201.44	3479.16	212.679	3479.16	145.338	3479.16	72.0774
3479.26	-11.7322	3479.26	133.771	3479.26	355.029	3479.26	172.345	3479.26	-17.8388
3479.35	0.78918	3479.35	41.0984	3479.35	103.572	3479.35	25.8448	3479.35	90.6353
3479.45	-26.17	3479.45	-190.778	3479.45	26.3085	3479.45	330.136	3479.45	126.599
3479.55	-14.1098	3479.55	-87.6577	3479.55	-13.7621	3479.55	348.918	3479.55	-9.5484
3479.65	-6.73021	3479.65	10.759	3479.65	-12.5393	3479.65	136.792	3479.65	104.294
3479.75	12.3889	3479.75	30.0725	3479.75	131.478	3479.75	103.659	3479.75	125.728
3479.84	45.5475	3479.84	-9.41647	3479.84	161.79	3479.84	114.619	3479.84	131.353
3479.94	19.3259	3479.94	74.3928	3479.94	105.198	3479.94	114.476	3479.94	237.274
3480.04	-11.3359	3480.04	-51.2988	3480.04	-150.995	3480.04	110.231	3480.04	227.193
3480.14	14.3824	3480.14	-56.3902	3480.14	-148.487	3480.14	-0.61432	3480.14	-50.1885
3480.23	-5.55918	3480.23	150.62	3480.23	110.722	3480.23	-163.556	3480.23	-68.8661
3480.33	-5.30033	3480.33	35.4318	3480.33	96.2365	3480.33	1.30703	3480.33	189.963
3480.43	19.5791	3480.43	-35.4528	3480.43	49.857	3480.43	109.978	3480.43	88.7022
3480.53	35.0192	3480.53	-50.3331	3480.53	38.7856	3480.53	-10.1405	3480.53	12.4537
3480.63	19.0002	3480.63	71.4917	3480.63	-171.976	3480.63	-167.547	3480.63	-35.6799
3480.72	-25.0579	3480.72	-11.6778	3480.72	-32.0269	3480.72	77.6591	3480.72	113.703
3480.82	-16.4349	3480.82	-111.741	3480.82	4.834	3480.82	132.38	3480.82	93.2043
3480.92	17.6091	3480.92	98.2017	3480.92	112.707	3480.92	8.71561	3480.92	23.4239
3481.02	5.07414	3481.02	72.1509	3481.02	102.392	3481.02	-136.934	3481.02	-55.1382
3481.11	9.54022	3481.11	28.106	3481.11	-65.2119	3481.11	-232.77	3481.11	9.71745
3481.21	-13.2528	3481.21	51.1667	3481.21	95.895	3481.21	136.508	3481.21	-139.011
3481.31	11.1951	3481.31	50.2323	3481.31	115.411	3481.31	157.997	3481.31	-127.825
3481.41	11.1235	3481.41	114.602	3481.41	50.4348	3481.41	31.795	3481.41	72.7731
3481.51	27.5326	3481.51	39.6744	3481.51	146.464	3481.51	-45.2996	3481.51	110.38
3481.6	52.6219	3481.6	84.049	3481.6	146.298	3481.6	46.6105	3481.6	163.192
3481.7	26.7514	3481.7	38.9245	3481.7	151.333	3481.7	214.323	3481.7	83.9078
3481.8	33.6209	3481.8	131.5	3481.8	80.4681	3481.8	115.635	3481.8	37.023
3481.9	4.49019	3481.9	179.574	3481.9	83.1012	3481.9	45.2446	3481.9	-46.5649
3481.99	19.8392	3481.99	179.347	3481.99	-92.9694	3481.99	246.55	3481.99	67.0416
3482.09	21.7678	3482.09	102.817	3482.09	53.5552	3482.09	-19.1509	3482.09	29.2407
3482.19	32.8558	3482.19	-29.4162	3482.19	40.7741	3482.19	-83.0587	3482.19	20.8309
3482.29	25.9833	3482.29	-32.0525	3482.29	160.387	3482.29	-75.4742	3482.29	79.7115
3482.39	11.3503	3482.39	2.00793	3482.39	9.89302	3482.39	30.0026	3482.39	64.5825
3482.48	5.63673	3482.48	56.8653	3482.48	-109.006	3482.48	46.2722	3482.48	12.9446
3482.58	-18.6573	3482.58	-70.7799	3482.58	-154.411	3482.58	11.7357	3482.58	186.799
3482.68	-5.61157	3482.68	-202.727	3482.68	-10.219	3482.68	32.2948	3482.68	25.1478
3482.78	18.5939	3482.78	-21.7753	3482.78	-26.8292	3482.78	-41.2487	3482.78	123.993
3482.87	5.33944	3482.87	72.7764	3482.87	-146.239	3482.87	31.9076	3482.87	25.6388
3482.97	7.20511	3482.97	162.429	3482.97	-205.248	3482.97	-27.4337	3482.97	-1.71276
3483.07	27.4911	3483.07	133.284	3483.07	-37.0521	3483.07	52.3301	3483.07	142.242
3483.17	10.6377	3483.17	51.7421	3483.17	-28.6501	3483.17	-94.3984	3483.17	99.1063
3483.26	38.025	3483.26	96.5046	3483.26	25.4603	3483.26	9.2833	3483.26	89.2835
3483.36	17.3132	3483.36	-15.4275	3483.36	100.981	3483.36	35.4776	3483.36	42.7763
3483.46	-23.9775	3483.46	92.0465	3483.46	-69.7869	3483.46	174.086	3483.46	-43.4128
3483.56	-4.24714	3483.56	-22.8728	3483.56	-141.542	3483.56	138.811	3483.56	-32.0821
3483.66	0.92444	3483.66	54.9152	3483.66	-24.9828	3483.66	147.152	3483.66	50.2697
3483.75	42.4973	3483.75	-0.28955	3483.75	147.09	3483.75	24.511	3483.75	119.943
3483.85	22.8113	3483.85	-53.487	3483.85	34.277	3483.85	7.78682	3483.85	84.5379
3483.95	7.52652	3483.95	-49.8775	3483.95	-135.823	3483.95	209.579	3483.95	49.953
3484.05	16.9628	3484.05	-34.1616	3484.05	43.4894	3484.05	75.1861	3484.05	148.187
3484.14	42.7201	3484.14	-70.24	3484.14	30.8126	3484.14	-5.99339	3484.14	141.138
3484.24	27.1981	3484.24	188.886	3484.24	-82.3552	3484.24	170.138	3484.24	41.5022
3484.34	23.6568	3484.34	214.816	3484.34	22.6842	3484.34	151.779	3484.34	-9.72224
3484.44	2.07588	3484.44	105.449	3484.44	81.7287	3484.44	-34.4746	3484.44	172.961
3484.54	8.81525	3484.54	85.6834	3484.54	-24.224	3484.54	73.3757	3484.54	224.949
3484.63	7.6947	3484.63	-111.582	3484.63	-3.07568	3484.63	-90.873	3484.63	166.338
3484.73	-12.2659	3484.73	-123.548	3484.73	89.6716	3484.73	170.577	3484.73	98.8259
3484.83	1.03321	3484.83	33.0853	3484.83	-73.7836	3484.83	183.924	3484.83	-54.3903
3484.93	-14.908	3484.93	-79.2838	3484.93	9.35728	3484.93	15.6666	3484.93	-67.6124
3485.02	-44.3496	3485.02	-100.655	3485.02	189.394	3485.02	-17.1968	3485.02	79.8584
3485.12	-28.3916	3485.12	-74.0295	3485.12	28.1248	3485.12	158.834	3485.12	128.321
3485.22	-14.9741	3485.22	56.6937	3485.22	74.5512	3485.22	133.258	3485.22	184.277
3485.32	9.04302	3485.32	123.115	3485.32	-48.5268	3485.32	-78.2228	3485.32	131.926
3485.42	17.4599	3485.42	130.534	3485.42	53.792	3485.42	259.192	3485.42	10.7697
3485.51	21.6966	3485.51	85.2524	3485.51	-66.691	3485.51	81.9052	3485.51	-17.4892
3485.61	9.31328	3485.61	97.5707	3485.61	36.426	3485.61	-54.6819	3485.61	-101.448
3485.71	45.3502	3485.71	92.9902	3485.71	-75.0548	3485.71	185.234	3485.71	-111.803
3485.81	23.0475	3485.81	42.1121	3485.81	-97.7312	3485.81	152.755	3485.81	-115.652
3485.9	41.9453	3485.9	50.7374	3485.9	22.8992	3485.9	53.4841	3485.9	11.9095
3486	32.664	3486	28.7675	3486	37.8387	3486	99.7247	3486	73.9852
3486.1	-5.41632	3486.1	98.0036	3486.1	129.589	3486.1	73.2791	3486.1	119.678
3486.2	-6.75549	3486.2	-30.5534	3486.2	-71.0466	3486.2	54.6499	3486.2	237.792
3486.3	-18.7533	3486.3	174.897	3486.3	-7.16768	3486.3	134.339	3486.3	183.128
3486.39	15.1102	3486.39	243.757	3486.39	25.0273	3486.39	52.9477	3486.39	30.8889
3486.49	-14.8047	3486.49	22.2245	3486.49	146.739	3486.49	-7.52282	3486.49	-19.4242
3486.59	-3.9182	3486.59	49.7015	3486.59	154.168	3486.59	135.028	3486.59	11.189
3486.69	-5.85016	3486.69	90.6873	3486.69	59.2138	3486.69	19.8991	3486.69	8.1282
3486.78	-6.6007	3486.78	50.6816	3486.78	107.476	3486.78	16.0903	3486.78	245.892
3486.88	12.6701	3486.88	160.584	3486.88	56.1528	3486.88	100.3	3486.88	216.179
3486.98	34.782	3486.98	214.393	3486.98	-14.5567	3486.98	161.126	3486.98	187.687
3487.08	17.495	3487.08	47.0082	3487.08	37.4454	3487.08	-10.733	3487.08	212.913
3487.18	3.50887	3487.18	-48.6715	3487.18	5.95704	3487.18	29.4193	3487.18	121.053
3487.27	4.78334	3487.27	-13.6474	3487.27	56.376	3487.27	-17.6194	3487.27	109.905
3487.37	-23.0217	3487.37	-45.9206	3487.37	-77.5999	3487.37	-7.85178	3487.37	113.565
3487.47	22.9535	3487.47	-42.3922	3487.47	-137.373	3487.47	66.8195	3487.47	79.4287
3487.57	8.90874	3487.57	-13.3633	3487.57	12.9553	3487.57	41.7922	3487.57	-39.1054
3487.66	23.604	3487.66	73.1654	3487.66	110.883	3487.66	85.7643	3487.66	243.36
3487.76	-15.0409	3487.76	-60.6068	3487.76	46.9091	3487.76	238.334	3487.76	123.022
3487.86	-7.06603	3487.86	-12.2802	3487.86	-50.4672	3487.86	85.6015	3487.86	-3.21881
3487.96	-7.01138	3487.96	107.145	3487.96	-32.2462	3487.96	-20.7347	3487.96	-113.064
3488.05	21.2631	3488.05	162.669	3488.05	105.672	3488.05	104.426	3488.05	23.3872
3488.15	3.31738	3488.15	188.992	3488.15	92.2896	3488.15	69.3854	3488.15	207.636
3488.25	-16.9683	3488.25	-17.9848	3488.25	152.007	3488.25	10.0442	3488.25	325.785
3488.35	-8.4139	3488.35	103.839	3488.35	81.3249	3488.35	8.00481	3488.35	-12.1646
3488.45	11.2608	3488.45	-1.43531	3488.45	-21.3531	3488.45	-208.43	3488.45	-121.008
3488.54	27.5961	3488.54	-13.0065	3488.54	68.9749	3488.54	-208.258	3488.54	168.557
3488.64	20.2521	3488.64	192.227	3488.64	111.911	3488.64	112.025	3488.64	286.536
3488.74	-7.17089	3488.74	86.4659	3488.74	131.059	3488.74	255.122	3488.74	199.031
3488.84	-10.4927	3488.84	134.812	3488.84	59.3202	3488.84	64.435	3488.84	88.5481
3488.93	11.9269	3488.93	96.8668	3488.93	3.69749	3488.93	45.068	3488.93	77.8894
3489.03	19.3881	3489.03	-49.969	3489.03	12.3929	3489.03	77.2234	3489.03	-53.8413
3489.13	10.8511	3489.13	-55.9944	3489.13	53.8083	3489.13	72.9033	3489.13	-134.242
3489.23	-19.5641	3489.23	95.2912	3489.23	-128.755	3489.23	123.309	3489.23	128.991
3489.33	14.4226	3489.33	72.5884	3489.33	1.00315	3489.33	206.042	3489.33	65.5568
3489.42	31.0313	3489.42	-67.1029	3489.42	145.684	3489.42	-164.798	3489.42	15.5571
3489.52	-2.73804	3489.52	-218.583	3489.52	13.6863	3489.52	-70.2107	3489.52	-80.109
3489.62	13.3144	3489.62	-101.451	3489.62	113.81	3489.62	-24.2976	3489.62	228.957
3489.72	0.22867	3489.72	113.79	3489.72	-11.8466	3489.72	-26.9602	3489.72	187.154
3489.81	54.2245	3489.81	113.442	3489.81	-143.585	3489.81	54.0996	3489.81	90.2789
3489.91	21.7218	3489.91	81.9012	3489.91	33.7928	3489.91	159.379	3489.91	219.228
3490.01	10.0802	3490.01	-33.4319	3490.01	-6.91546	3490.01	44.5761	3490.01	339.9
3490.11	20.3797	3490.11	58.2411	3490.11	-19.1121	3490.11	-35.1127	3490.11	140.788
3490.21	15.0801	3490.21	122.019	3490.21	-39.4994	3490.21	33.0099	3490.21	133.992
3490.3	44.761	3490.3	48.9008	3490.3	229.721	3490.3	23.5414	3490.3	61.806
3490.4	21.7024	3490.4	76.8852	3490.4	61.0457	3490.4	-38.4207	3490.4	-20.2715
3490.5	25.5442	3490.5	42.1717	3490.5	3.87466	3490.5	10.322	3490.5	130.957
3490.6	43.0262	3490.6	3.05952	3490.6	26.5063	3490.6	142.968	3490.6	-55.8108
3490.69	9.94836	3490.69	70.3485	3490.69	55.04	3490.69	257.716	3490.69	159.625
3490.79	-7.06928	3490.79	126.239	3490.79	69.5758	3490.79	131.267	3490.79	349.064
3490.89	11.0133	3490.89	168.33	3490.89	-20.9857	3490.89	60.8217	3490.89	329.106
3490.99	36.7162	3490.99	44.9233	3490.99	98.1565	3490.99	130.581	3490.99	248.555
3491.08	8.31963	3491.08	-1.8805	3491.08	124.104	3491.08	184.946	3491.08	325.212
3491.18	-29.5363	3491.18	19.7196	3491.18	65.7592	3491.18	226.221	3491.18	86.6806
3491.28	4.10862	3491.28	-133.275	3491.28	25.0243	3491.28	-15.2919	3491.28	128.164
3491.38	1.73468	3491.38	-108.463	3491.38	81.9022	3491.38	239.411	3491.38	277.368
3491.48	-1.67788	3491.48	2.65736	3491.48	34.0958	3491.48	-39.367	3491.48	195.096
3491.57	-24.5688	3491.57	33.6874	3491.57	-33.0919	3491.57	-20.6219	3491.57	92.3519
3491.67	19.8222	3491.67	17.9288	3491.67	148.042	3491.67	107.05	3491.67	-31.0586
3491.77	10.5753	3491.77	-121.517	3491.77	102.7	3491.77	27.951	3491.77	233.568
3491.87	30.0908	3491.87	10.2508	3491.87	159.585	3491.87	86.8851	3491.87	388.936
3491.96	1.42873	3491.96	-192.466	3491.96	111.398	3491.96	198.254	3491.96	193.847
3492.06	-5.19067	3492.06	-104.868	3492.06	68.9408	3492.06	148.36	3492.06	115.405
3492.16	-4.34736	3492.16	99.7469	3492.16	89.2147	3492.16	201.304	3492.16	-61.8904
3492.26	8.61869	3492.26	404.578	3492.26	151.92	3492.26	202.286	3492.26	-125.238
3492.36	25.6474	3492.36	259.025	3492.36	100.955	3492.36	276.306	3492.36	121.262
3492.45	1.85885	3492.45	155.688	3492.45	69.0213	3492.45	244.563	3492.45	198.208
3492.55	9.79276	3492.55	95.6656	3492.55	144.616	3492.55	295.755	3492.55	194.599
3492.65	-30.331	3492.65	104.358	3492.65	54.4369	3492.65	225.581	3492.65	277.53
3492.75	-15.8325	3492.75	-7.03769	3492.75	-1.21713	3492.75	72.0361	3492.75	147.699
3492.84	9.64793	3492.84	-134.721	3492.84	13.6513	3492.84	113.219	3492.84	112.203
3492.94	29.0101	3492.94	-36.694	3492.94	20.8398	3492.94	180.427	3492.94	262.038
3493.04	43.7339	3493.04	93.1423	3493.04	56.8461	3493.04	54.8568	3493.04	262.1
3493.14	7.77903	3493.14	218.987	3493.14	233.268	3493.14	36.7058	3493.14	148.687
3493.24	52.7254	3493.24	29.1388	3493.24	131.704	3493.24	121.972	3493.24	269.994
3493.33	54.0328	3493.33	-9.30286	3493.33	-40.748	3493.33	154.153	3493.33	179.921
3493.43	20.5013	3493.43	32.1616	3493.43	212.112	3493.43	33.0488	3493.43	58.9653
3493.53	5.7308	3493.53	155.132	3493.53	321.183	3493.53	14.1584	3493.53	225.627
3493.63	8.4613	3493.63	95.7085	3493.63	116.766	3493.63	146.682	3493.63	84.1072
3493.72	7.09292	3493.72	60.3916	3493.72	42.7615	3493.72	19.7219	3493.72	264.207
3493.82	11.8858	3493.82	206.382	3493.82	-60.2286	3493.82	56.879	3493.82	343.728
3493.92	-2.19987	3493.92	11.2815	3493.92	-34.1022	3493.92	299.856	3493.92	321.675
3494.02	27.3761	3494.02	9.79084	3494.02	69.8434	3494.02	247.957	3494.02	270.551
3494.12	27.3941	3494.12	-58.4882	3494.12	-42.9888	3494.12	100.486	3494.12	97.8618
3494.21	12.7344	3494.21	166.246	3494.21	-129.195	3494.21	-90.254	3494.21	49.4119
3494.31	26.4172	3494.31	47.7961	3494.31	38.9276	3494.31	-6.15791	3494.31	118.507
3494.41	50.1629	3494.41	-138.737	3494.41	111.883	3494.41	178.378	3494.41	289.952
3494.51	31.5118	3494.51	-77.4511	3494.51	190.875	3494.51	112.659	3494.51	205.954
3494.6	38.2042	3494.6	157.956	3494.6	64.4064	3494.6	213.489	3494.6	175.216
3494.7	13.7803	3494.7	269.684	3494.7	149.88	3494.7	173.47	3494.7	139.142
3494.8	-14.3198	3494.8	214.736	3494.8	95.0979	3494.8	268.507	3494.8	230.338
3494.9	3.28433	3494.9	109.013	3494.9	214.162	3494.9	-14.6002	3494.9	339.604
3495	-2.06741	3495	21.4136	3495	199.174	3495	118.951	3495	184.844
3495.09	-6.19494	3495.09	-240.56	3495.09	253.934	3495.09	48.4619	3495.09	193.757
3495.19	32.9817	3495.19	7.19104	3495.19	359.341	3495.19	176.431	3495.19	127.343
3495.29	32.2426	3495.29	138.367	3495.29	232.996	3495.29	196.558	3495.29	143.602
3495.39	23.0874	3495.39	1.76667	3495.39	169.496	3495.39	81.8415	3495.39	19.9312
3495.48	-36.4639	3495.48	-21.1105	3495.48	197.841	3495.48	150.279	3495.48	150.128
3495.58	-31.2315	3495.58	136.234	3495.58	124.627	3495.58	87.668	3495.58	387.189
3495.68	9.70441	3495.68	139	3495.68	65.0528	3495.68	84.2061	3495.68	125.212
3495.78	48.6036	3495.78	94.1852	3495.78	147.416	3495.78	52.8901	3495.78	281.892
3495.87	52.9059	3495.87	55.389	3495.87	300.615	3495.87	272.218	3495.87	225.226
3495.97	46.1712	3495.97	-24.5897	3495.97	159.447	3495.97	302.786	3495.97	227.112
3496.07	23.5593	3496.07	5.24836	3496.07	144.212	3496.07	256.495	3496.07	273.348
3496.17	-11.0699	3496.17	29.1027	3496.17	86.8071	3496.17	88.3409	3496.17	427.73
3496.27	15.1436	3496.27	87.2731	3496.27	252.533	3496.27	248.625	3496.27	369.661
3496.36	-26.1802	3496.36	91.2597	3496.36	109.49	3496.36	402.047	3496.36	171.138
3496.46	10.6989	3496.46	50.1632	3496.46	157.18	3496.46	286.009	3496.46	412.666
3496.56	17.341	3496.56	310.485	3496.56	98.9028	3496.56	149.513	3496.56	429.545
3496.66	32.7462	3496.66	222.025	3496.66	40.6626	3496.66	141.261	3496.66	276.781
3496.75	33.175	3496.75	59.986	3496.75	44.362	3496.75	106.058	3496.75	309.177
3496.85	-10.8924	3496.85	179.77	3496.85	184.505	3496.85	272.009	3496.85	342.841
3496.95	27.3444	3496.95	74.6787	3496.95	250.295	3496.95	132.218	3496.95	368.577
3497.05	44.8657	3497.05	142.515	3497.05	245.938	3497.05	197.192	3497.05	365.594
3497.15	39.2921	3497.15	17.4806	3497.15	103.637	3497.15	263.235	3497.15	385.398
3497.24	23.9838	3497.24	-29.1214	3497.24	167.498	3497.24	238.253	3497.24	268.596
3497.34	9.76138	3497.34	-145.489	3497.34	320.324	3497.34	161.453	3497.34	220.095
3497.44	15.3651	3497.44	-85.72	3497.44	45.8204	3497.44	306.238	3497.44	202.602
3497.54	32.9753	3497.54	16.6877	3497.54	153.291	3497.54	324.115	3497.54	328.723
3497.63	36.3123	3497.63	60.9356	3497.63	168.738	3497.63	298.285	3497.63	220.461
3497.73	40.7162	3497.73	100.925	3497.73	85.9642	3497.73	201.754	3497.73	343.022
3497.83	7.36732	3497.83	66.5572	3497.83	237.372	3497.83	373.923	3497.83	486.608
3497.93	-6.83434	3497.93	233.232	3497.93	283.562	3497.93	363.592	3497.93	414.32
3498.03	-17.1687	3498.03	174.351	3498.03	229.535	3498.03	320.264	3498.03	121.359
3498.12	-13.1958	3498.12	187.713	3498.12	106.69	3498.12	300.337	3498.12	438.126
3498.22	49.9643	3498.22	99.1171	3498.22	-98.9729	3498.22	433.71	3498.22	249.817
3498.32	15.4914	3498.32	146.264	3498.32	-53.2555	3498.32	300.583	3498.32	175.533
3498.42	-2.81445	3498.42	19.8517	3498.42	61.041	3498.42	65.2525	3498.42	146.37
3498.51	31.1264	3498.51	65.4801	3498.51	127.915	3498.51	284.617	3498.51	169.926
3498.61	29.974	3498.61	-118.552	3498.61	248.964	3498.61	428.675	3498.61	296.898
3498.71	54.2881	3498.71	2.05499	3498.71	265.687	3498.71	436.824	3498.71	209.584
3498.81	24.4686	3498.81	3.30016	3498.81	179.684	3498.81	315.062	3498.81	353.482
3498.91	41.8156	3498.91	-127.017	3498.91	206.053	3498.91	316.591	3498.91	294.893
3499	5.42891	3499	148.805	3499	142.995	3499	416.908	3499	247.215
3499.1	18.5087	3499.1	335.165	3499.1	301.911	3499.1	527.417	3499.1	257.75
3499.2	30.6352	3499.2	186.664	3499.2	155.603	3499.2	277.318	3499.2	160.302
3499.3	16.3685	3499.3	152.105	3499.3	208.972	3499.3	205.616	3499.3	375.974
3499.39	32.1491	3499.39	20.9878	3499.39	204.323	3499.39	404.114	3499.39	328.372
3499.49	46.2372	3499.49	5.01619	3499.49	317.161	3499.49	392.318	3499.49	399.102
3499.59	17.2934	3499.59	68.3924	3499.59	357.59	3499.59	533.934	3499.59	388.572
3499.69	10.5181	3499.69	-93.1806	3499.69	413.215	3499.69	349.07	3499.69	625.692
3499.78	7.85193	3499.78	28.3007	3499.78	284.645	3499.78	407.633	3499.78	514.071
3499.88	-6.58455	3499.88	-21.0603	3499.88	332.985	3499.88	458.032	3499.88	369.02
3499.98	27.7093	3499.98	80.9399	3499.98	460.641	3499.98	365.875	3499.98	350.048
3500.08	20.214	3500.08	84.5051	3500.08	416.922	3500.08	442.57	3500.08	392.167
3500.18	20.5502	3500.18	225.939	3500.18	178.133	3500.18	328.326	3500.18	529.487
3500.27	38.4585	3500.27	63.0438	3500.27	346.181	3500.27	149.85	3500.27	373.817
3500.37	16.9393	3500.37	-102.976	3500.37	328.872	3500.37	501.049	3500.37	510.766
3500.47	16.8331	3500.47	178.081	3500.47	199.61	3500.47	381.831	3500.47	436.143
3500.57	-21.7596	3500.57	337.618	3500.57	391.601	3500.57	225.799	3500.57	428.254
3500.66	-17.3387	3500.66	11.4366	3500.66	322.948	3500.66	606.36	3500.66	496.404
3500.76	37.7162	3500.76	145.538	3500.76	265.453	3500.76	533.015	3500.76	789.098
3500.86	38.7453	3500.86	150.524	3500.86	622.919	3500.86	426.068	3500.86	555.84
3500.96	26.2686	3500.96	389.095	3500.96	383.247	3500.96	335.621	3500.96	486.931
3501.06	13.9263	3501.06	269.551	3501.06	306.439	3501.06	415.875	3501.06	601.273
3501.15	7.29844	3501.15	180.693	3501.15	368.394	3501.15	259.53	3501.15	633.766
3501.25	25.685	3501.25	234.721	3501.25	343.513	3501.25	194.586	3501.25	449.012
3501.35	20.6659	3501.35	186.835	3501.35	402.196	3501.35	440.945	3501.35	401.61
3501.45	30.3614	3501.45	182.835	3501.45	570.244	3501.45	502.905	3501.45	639.261
3501.54	80.2914	3501.54	359.922	3501.54	465.357	3501.54	360.769	3501.54	768.166
3501.64	45.1361	3501.64	147.895	3501.64	306.437	3501.64	465.439	3501.64	749.128
3501.74	36.7156	3501.74	176.958	3501.74	485.386	3501.74	563.416	3501.74	846.049
3501.84	75.5103	3501.84	-13.0898	3501.84	506.307	3501.84	651.004	3501.84	704.435
3501.94	43.4805	3501.94	186.155	3501.94	394.504	3501.94	627.61	3501.94	600.891
3502.03	24.1067	3502.03	162.794	3502.03	368.682	3502.03	484.138	3502.03	709.527
3502.13	38.2494	3502.13	253.332	3502.13	434.348	3502.13	406.297	3502.13	737.851
3502.23	77.5092	3502.23	287.673	3502.23	419.11	3502.23	491.897	3502.23	666.075
3502.33	46.9271	3502.33	309.42	3502.33	414.675	3502.33	725.747	3502.33	515.713
3502.42	44.7237	3502.42	183.679	3502.42	569.654	3502.42	660.161	3502.42	812.98
3502.52	62.48	3502.52	258.255	3502.52	544.557	3502.52	570.649	3502.52	812.491
3502.62	52.717	3502.62	270.254	3502.62	704.795	3502.62	488.227	3502.62	731.263
3502.72	45.8558	3502.72	125.082	3502.72	509.68	3502.72	497.008	3502.72	613.815
3502.82	41.4572	3502.82	296.746	3502.82	379.723	3502.82	640.207	3502.82	829.264
3502.91	10.1425	3502.91	190.652	3502.91	743.836	3502.91	565.639	3502.91	840.728
3503.01	37.0125	3503.01	114.504	3503.01	532.432	3503.01	594.217	3503.01	807.426
3503.11	40.8484	3503.11	232.811	3503.11	444.72	3503.11	476.855	3503.11	916.574
3503.21	39.1909	3503.21	324.376	3503.21	496.511	3503.21	639.767	3503.21	987.188
3503.3	60.2411	3503.3	268.205	3503.3	610.017	3503.3	715.365	3503.3	1001.19
3503.4	72.3596	3503.4	365.003	3503.4	691.844	3503.4	642.159	3503.4	917.078
3503.5	76.5272	3503.5	405.175	3503.5	694.003	3503.5	718.06	3503.5	933.779
3503.6	74.8846	3503.6	466.123	3503.6	538.2	3503.6	773.777	3503.6	780.1
3503.7	52.9324	3503.7	229.252	3503.7	694.241	3503.7	713.018	3503.7	765.452
3503.79	101.931	3503.79	225.665	3503.79	554.334	3503.79	898.89	3503.79	913.443
3503.89	116.581	3503.89	332.165	3503.89	645.783	3503.89	868.002	3503.89	992.282
3503.99	63.7029	3503.99	333.054	3503.99	663.093	3503.99	698.858	3503.99	1071.18
3504.09	39.997	3504.09	516.635	3504.09	699.071	3504.09	753.465	3504.09	1111.04
3504.18	62.2438	3504.18	422.91	3504.18	393.82	3504.18	1085.83	3504.18	1171.47
3504.28	45.5639	3504.28	495.784	3504.28	619.247	3504.28	1046.16	3504.28	1076.28
3504.38	65.0979	3504.38	635.459	3504.38	649.159	3504.38	949.062	3504.38	1144.88
3504.48	43.2663	3504.48	476.339	3504.48	737.262	3504.48	767.246	3504.48	1262.49
3504.57	44.9299	3504.57	552.929	3504.57	772.966	3504.57	830.122	3504.57	1246.41
3504.67	44.6496	3504.67	618.733	3504.67	759.88	3504.67	965.403	3504.67	1373.56
3504.77	55.5265	3504.77	567.558	3504.77	933.915	3504.77	987.902	3504.77	1160.06
3504.87	63.9215	3504.87	469.011	3504.87	907.285	3504.87	960.036	3504.87	1247.72
3504.97	40.7961	3504.97	396.998	3504.97	785.803	3504.97	1044.92	3504.97	1306.78
3505.06	51.6915	3505.06	547.429	3505.06	902.886	3505.06	1277.38	3505.06	1457.65
3505.16	43.5093	3505.16	556.712	3505.16	878.151	3505.16	1152.23	3505.16	1417.76
3505.26	76.6712	3505.26	488.857	3505.26	772.616	3505.26	1036.39	3505.26	1516.15
3505.36	100.679	3505.36	471.875	3505.36	1081.3	3505.36	1274.5	3505.36	1545.73
3505.45	58.6139	3505.45	256.274	3505.45	1055.62	3505.45	1044.57	3505.45	1446.84
3505.55	51.6183	3505.55	250.168	3505.55	968.41	3505.55	871.223	3505.55	1386.41
3505.65	68.3539	3505.65	402.766	3505.65	977.376	3505.65	1205.8	3505.65	1568.57
3505.75	92.5425	3505.75	695.878	3505.75	1077.74	3505.75	1336.51	3505.75	1382.07
3505.85	63.4658	3505.85	507.417	3505.85	1138.73	3505.85	1326.89	3505.85	1432.11
3505.94	76.7455	3505.94	433.292	3505.94	1044.27	3505.94	1258.75	3505.94	1549.05
3506.04	79.9234	3506.04	691.112	3506.04	1022.46	3506.04	1294.93	3506.04	1522.29
3506.14	97.9808	3506.14	466.286	3506.14	985.027	3506.14	1558.84	3506.14	1694.18
3506.24	110.179	3506.24	451.624	3506.24	931.389	3506.24	1557.61	3506.24	1749.94
3506.33	97.06	3506.33	563.333	3506.33	982.459	3506.33	1357.14	3506.33	1830.28
3506.43	121.564	3506.43	610.719	3506.43	1036.85	3506.43	1479.57	3506.43	1881.74
3506.53	126.073	3506.53	616.19	3506.53	1003.48	3506.53	1494.59	3506.53	1921.72
3506.63	97.8275	3506.63	597.65	3506.63	1244.35	3506.63	1507.33	3506.63	1885.65
3506.73	106.808	3506.73	620.006	3506.73	1214.77	3506.73	1591.1	3506.73	1903.63
3506.82	126.736	3506.82	744.261	3506.82	1376.06	3506.82	1579.81	3506.82	1954.89
3506.92	117.352	3506.92	821.721	3506.92	1386.12	3506.92	1571.87	3506.92	1882.14
3507.02	137.537	3507.02	714.489	3507.02	1407.56	3507.02	1619.29	3507.02	2072.99
3507.12	122.651	3507.12	590.67	3507.12	1487.59	3507.12	1669.37	3507.12	2016.65
3507.21	111.735	3507.21	634.169	3507.21	1451.91	3507.21	1761.44	3507.21	2361.33
3507.31	136.31	3507.31	834.99	3507.31	1330.35	3507.31	1909	3507.31	2559.06
3507.41	146.597	3507.41	876.837	3507.41	1331.99	3507.41	1846.46	3507.41	2307.83
3507.51	101.836	3507.51	730.716	3507.51	1466.57	3507.51	1707.64	3507.51	2465.48
3507.6	114.549	3507.6	700.332	3507.6	1525.27	3507.6	1804.64	3507.6	2420.81
3507.7	145.936	3507.7	922.491	3507.7	1601.12	3507.7	1941.78	3507.7	2368.04
3507.8	173.319	3507.8	831.099	3507.8	1404.93	3507.8	1844.88	3507.8	2383.78
3507.9	191.158	3507.9	911.86	3507.9	1565.51	3507.9	1849.84	3507.9	2497.96
3508	154.994	3508	1084.18	3508	1589.56	3508	2013.38	3508	2644.48
3508.09	146.827	3508.09	966.964	3508.09	1671.49	3508.09	2071.91	3508.09	2697.67
3508.19	137.34	3508.19	811.616	3508.19	1871.72	3508.19	2157.84	3508.19	2810.53
3508.29	162.992	3508.29	909.638	3508.29	1821.05	3508.29	2346.77	3508.29	2928.37
3508.39	198.142	3508.39	939.23	3508.39	1834.68	3508.39	2399.71	3508.39	3089.99
3508.48	190.192	3508.48	920.093	3508.48	1955.6	3508.48	2408.85	3508.48	3066.7
3508.58	228.38	3508.58	937.022	3508.58	1772.02	3508.58	2317.29	3508.58	3030.97
3508.68	224.106	3508.68	981.312	3508.68	1985.22	3508.68	2256.71	3508.68	3168.39
3508.78	210.347	3508.78	1043.75	3508.78	2088.97	3508.78	2603.89	3508.78	3223.84
3508.88	221.542	3508.88	1169.93	3508.88	2110.46	3508.88	2546.7	3508.88	3281.48
3508.97	182.987	3508.97	1222.73	3508.97	2095.76	3508.97	2647.2	3508.97	3124.15
3509.07	178.06	3509.07	1207.73	3509.07	2278.02	3509.07	2807.53	3509.07	3329.5
3509.17	206.356	3509.17	1007.21	3509.17	2368.8	3509.17	2977.75	3509.17	3306.74
3509.27	231.83	3509.27	1163.32	3509.27	2455.43	3509.27	2794.17	3509.27	3519.4
3509.36	223.416	3509.36	1215.25	3509.36	2430.66	3509.36	2889.33	3509.36	3695.76
3509.46	244.086	3509.46	1200.15	3509.46	2580.99	3509.46	3052.21	3509.46	3789.01
3509.56	231.755	3509.56	1365.47	3509.56	2566.05	3509.56	2952.01	3509.56	3795.62
3509.66	207.792	3509.66	1272.36	3509.66	2340.64	3509.66	3054.32	3509.66	3916.13
3509.76	247.328	3509.76	1325.46	3509.76	2649.85	3509.76	3207.9	3509.76	3894.68
3509.85	244.433	3509.85	1459.42	3509.85	2659.66	3509.85	3272.5	3509.85	3908.28
3509.95	254.336	3509.95	1543.67	3509.95	2636.65	3509.95	3361.87	3509.95	4027.04
3510.05	222.784	3510.05	1578.32	3510.05	2785.56	3510.05	3497.33	3510.05	4222.84
3510.15	215.583	3510.15	1531.9	3510.15	2854.64	3510.15	3626.59	3510.15	4382.64
3510.24	200.179	3510.24	1413.33	3510.24	2844.24	3510.24	3546.24	3510.24	4345.38
3510.34	231.196	3510.34	1527.21	3510.34	2965.86	3510.34	3494.47	3510.34	4364.4
3510.44	284.477	3510.44	1672.13	3510.44	3063.13	3510.44	3669.14	3510.44	4605.19
3510.54	261.525	3510.54	1591.2	3510.54	2995.83	3510.54	3946.8	3510.54	4732.03
3510.64	264.958	3510.64	1740.49	3510.64	2993.83	3510.64	3944.47	3510.64	4761.3
3510.73	305.438	3510.73	1893.28	3510.73	3180.81	3510.73	3733.16	3510.73	4772.11
3510.83	296	3510.83	1657.74	3510.83	3105.21	3510.83	3730.76	3510.83	4882.49
3510.93	269.722	3510.93	1615.02	3510.93	3261.75	3510.93	3826.64	3510.93	4988.9
3511.03	292.997	3511.03	1532.37	3511.03	3296.95	3511.03	3994.33	3511.03	4974.92
3511.12	254.539	3511.12	1724.64	3511.12	3241.4	3511.12	4143.76	3511.12	4986.95
3511.22	312.179	3511.22	1770.55	3511.22	3244.27	3511.22	3991.03	3511.22	5092.41
3511.32	285.886	3511.32	1827.81	3511.32	3294.51	3511.32	4046.5	3511.32	5307.35
3511.42	275.909	3511.42	1700.74	3511.42	3255.96	3511.42	4021.74	3511.42	5327.72
3511.52	291.313	3511.52	1757.74	3511.52	3384.64	3511.52	4128.36	3511.52	5100.63
3511.61	267.023	3511.61	1830.3	3511.61	3409.54	3511.61	4110.18	3511.61	5249.16
3511.71	276.763	3511.71	1780.8	3511.71	3459.96	3511.71	4111.79	3511.71	5317.36
3511.81	300.795	3511.81	1813.61	3511.81	3438.16	3511.81	4020.56	3511.81	5179.8
3511.91	282.52	3511.91	1773.91	3511.91	3409	3511.91	4256.15	3511.91	5341.39
3512	331.28	3512	1704.76	3512	3372.55	3512	4268.92	3512	5421.95
3512.1	297.236	3512.1	1711.74	3512.1	3360.96	3512.1	4188.31	3512.1	5149.5
3512.2	298.048	3512.2	1731.7	3512.2	3283.77	3512.2	4186.29	3512.2	5112.15
3512.3	295.517	3512.3	1871.03	3512.3	3342.37	3512.3	4049.02	3512.3	5222.63
3512.4	292.408	3512.4	1813.69	3512.4	3392.12	3512.4	3912.58	3512.4	5398.31
3512.49	296.345	3512.49	1648.19	3512.49	3405.04	3512.49	3924.38	3512.49	5000.96
3512.59	266.835	3512.59	1618.73	3512.59	3385.83	3512.59	3804.57	3512.59	4883.41
3512.69	301.948	3512.69	1765.62	3512.69	3099.48	3512.69	3937.61	3512.69	4981.24
3512.79	282.038	3512.79	1557.32	3512.79	2913.77	3512.79	3903.75	3512.79	4887
3512.88	271.763	3512.88	1381.49	3512.88	2988.26	3512.88	3616.39	3512.88	4647.49
3512.98	260.807	3512.98	1527.23	3512.98	2990.46	3512.98	3729.28	3512.98	4415.62
3513.08	236.436	3513.08	1435.98	3513.08	2641.63	3513.08	3509.86	3513.08	4334.2
3513.18	203.787	3513.18	1380.59	3513.18	2887.52	3513.18	3347.55	3513.18	4049.52
3513.27	229.42	3513.27	1280.28	3513.27	2833.43	3513.27	3261.37	3513.27	4102.69
3513.37	206.302	3513.37	1321.39	3513.37	2685.64	3513.37	3267.83	3513.37	3765.96
3513.47	170.668	3513.47	1441.31	3513.47	2302.74	3513.47	2943.43	3513.47	3589.29
3513.57	179.262	3513.57	1218.18	3513.57	2101.16	3513.57	2707.58	3513.57	3290.55
3513.67	182.712	3513.67	909.357	3513.67	1993.96	3513.67	2607.9	3513.67	2949.38
3513.76	205.896	3513.76	923.582	3513.76	1846.46	3513.76	2470.32	3513.76	3035.53
3513.86	164.338	3513.86	757.617	3513.86	1793.96	3513.86	2128.17	3513.86	2665.99
3513.96	127.052	3513.96	718.67	3513.96	1745.86	3513.96	1981.36	3513.96	2274.55
3514.06	143.956	3514.06	653.594	3514.06	1465.42	3514.06	1861.32	3514.06	2051.66
3514.15	94.115	3514.15	735.475	3514.15	1312.1	3514.15	1456.47	3514.15	1709.74
3514.25	74.1203	3514.25	679.738	3514.25	892.394	3514.25	1221.2	3514.25	1476.36
3514.35	61.928	3514.35	365.237	3514.35	826.972	3514.35	861.676	3514.35	1135.52
3514.45	76.199	3514.45	272.45	3514.45	757.15	3514.45	490.722	3514.45	708.957
3514.55	25.6173	3514.55	93.5789	3514.55	441.784	3514.55	340.117	3514.55	400.926
3514.64	12.5098	3514.64	19.5401	3514.64	139.161	3514.64	146.374	3514.64	311.447
3514.74	16.1848	3514.74	0.8593	3514.74	-139.515	3514.74	-239.173	3514.74	48.6635
3514.84	-41.8886	3514.84	-237.734	3514.84	-379.332	3514.84	-266.978	3514.84	-513.968
3514.94	-69.5617	3514.94	-342.311	3514.94	-478.383	3514.94	-558.901	3514.94	-758.497
3515.03	-83.9872	3515.03	-287.352	3515.03	-877.974	3515.03	-781.423	3515.03	-948.3
3515.13	-88.08	3515.13	-517.952	3515.13	-1155.74	3515.13	-1029.85	3515.13	-1292.79
3515.23	-70.1984	3515.23	-747.625	3515.23	-1181.75	3515.23	-1444.65	3515.23	-1599.94
3515.33	-91.5848	3515.33	-790.108	3515.33	-1383.93	3515.33	-1668.44	3515.33	-2060.39
3515.43	-127.547	3515.43	-777.269	3515.43	-1319.44	3515.43	-1804.78	3515.43	-2309.67
3515.52	-134.476	3515.52	-818.809	3515.52	-1434.33	3515.52	-2018.06	3515.52	-2714.22
3515.62	-189.834	3515.62	-863.166	3515.62	-1797.2	3515.62	-2269.02	3515.62	-3006.87
3515.72	-186.924	3515.72	-1011.32	3515.72	-2031.04	3515.72	-2647.79	3515.72	-3083.86
3515.82	-203.781	3515.82	-1175.89	3515.82	-2167.52	3515.82	-2877.44	3515.82	-3348.9
3515.91	-237.645	3515.91	-1133.03	3515.91	-2162.39	3515.91	-2819.3	3515.91	-3697.97
3516.01	-265.103	3516.01	-1143.97	3516.01	-2504.28	3516.01	-3079.62	3516.01	-3837.23
3516.11	-254.332	3516.11	-1510.35	3516.11	-2605.41	3516.11	-3218.87	3516.11	-3892.63
3516.21	-261.353	3516.21	-1338.07	3516.21	-2780.19	3516.21	-3261	3516.21	-3874.3
3516.3	-250.498	3516.3	-1509.38	3516.3	-2951.81	3516.3	-3441.78	3516.3	-4229.75
3516.4	-265.124	3516.4	-1569.75	3516.4	-2828.44	3516.4	-3643.47	3516.4	-4416.63
3516.5	-287.974	3516.5	-1471.82	3516.5	-3056.41	3516.5	-3612.02	3516.5	-4393.32
3516.6	-277.617	3516.6	-1648.03	3516.6	-3108.15	3516.6	-3723.36	3516.6	-4569.67
3516.7	-277.071	3516.7	-1451.18	3516.7	-3172.73	3516.7	-4030.93	3516.7	-4777.48
3516.79	-258.895	3516.79	-1420.99	3516.79	-3250.17	3516.79	-4069.39	3516.79	-4858.48
3516.89	-277.174	3516.89	-1687.72	3516.89	-3283.88	3516.89	-3908.91	3516.89	-4922.03
3516.99	-300.717	3516.99	-1711.33	3516.99	-3502.46	3516.99	-4056.18	3516.99	-5077.12
3517.09	-276.896	3517.09	-1801.61	3517.09	-3348.39	3517.09	-4247.25	3517.09	-5061.51
3517.18	-280.125	3517.18	-1758.27	3517.18	-3141.96	3517.18	-4213.91	3517.18	-5078.51
3517.28	-293.382	3517.28	-1827.03	3517.28	-3076.59	3517.28	-4112.76	3517.28	-5231.45
3517.38	-288.244	3517.38	-1682.41	3517.38	-3402.6	3517.38	-3989.15	3517.38	-5210.5
3517.48	-294.25	3517.48	-1764.04	3517.48	-3439.04	3517.48	-4225.9	3517.48	-5364.64
3517.58	-304.639	3517.58	-1824.76	3517.58	-3409.85	3517.58	-4262.27	3517.58	-5294.25
3517.67	-294.37	3517.67	-1942.9	3517.67	-3523.38	3517.67	-4082.3	3517.67	-5260.12
3517.77	-280.502	3517.77	-1801.69	3517.77	-3408.66	3517.77	-4092.74	3517.77	-5357.42
3517.87	-299.713	3517.87	-1941.76	3517.87	-3343.44	3517.87	-4174.71	3517.87	-5382.41
3517.97	-324.74	3517.97	-1899.22	3517.97	-3369.62	3517.97	-4154.94	3517.97	-5248.44
3518.06	-295.339	3518.06	-1832.79	3518.06	-3319.21	3518.06	-4057.81	3518.06	-5010.63
3518.16	-279.362	3518.16	-1788.96	3518.16	-3297.6	3518.16	-4046.11	3518.16	-4832.98
3518.26	-290.644	3518.26	-1860.54	3518.26	-3263.06	3518.26	-4091.38	3518.26	-4908.95
3518.36	-233.516	3518.36	-1576.01	3518.36	-3282.45	3518.36	-3927.18	3518.36	-4933.99
3518.46	-285.825	3518.46	-1613.44	3518.46	-3404.88	3518.46	-3968.69	3518.46	-4919.81
3518.55	-243.461	3518.55	-1603.8	3518.55	-3255.89	3518.55	-3649.72	3518.55	-4789.3
3518.65	-260.748	3518.65	-1691.34	3518.65	-3361.36	3518.65	-3720.32	3518.65	-4639.79
3518.75	-296.752	3518.75	-1660.41	3518.75	-3070.78	3518.75	-3724.83	3518.75	-4561.43
3518.85	-248.535	3518.85	-1506.74	3518.85	-2754.59	3518.85	-3730.38	3518.85	-4590.62
3518.94	-250.059	3518.94	-1647.46	3518.94	-2870.24	3518.94	-3540.95	3518.94	-4469.91
3519.04	-265.723	3519.04	-1696.08	3519.04	-2816.77	3519.04	-3524.83	3519.04	-4421.56
3519.14	-239.866	3519.14	-1691.43	3519.14	-2955.77	3519.14	-3594.79	3519.14	-4565.3
3519.24	-244.566	3519.24	-1517.79	3519.24	-2906.25	3519.24	-3595.65	3519.24	-4407.83
3519.34	-258.498	3519.34	-1335.67	3519.34	-2722.59	3519.34	-3516.04	3519.34	-4310.62
3519.43	-260.257	3519.43	-1232.36	3519.43	-2594.66	3519.43	-3397.68	3519.43	-4303.95
3519.53	-259.677	3519.53	-1157.03	3519.53	-2698.21	3519.53	-3110.76	3519.53	-4252.34
3519.63	-279.651	3519.63	-1308.17	3519.63	-2644.39	3519.63	-3242.25	3519.63	-4110.23
3519.73	-239.851	3519.73	-1172.64	3519.73	-2658.24	3519.73	-3335.31	3519.73	-3853.51
3519.82	-194.727	3519.82	-1328.11	3519.82	-2585.58	3519.82	-3358.51	3519.82	-3747.19
3519.92	-224.77	3519.92	-1354.84	3519.92	-2370.11	3519.92	-3039.18	3519.92	-3515.62
3520.02	-244.187	3520.02	-1232.47	3520.02	-2330.14	3520.02	-2925.93	3520.02	-3554.06
3520.12	-229.048	3520.12	-1283.26	3520.12	-2126.46	3520.12	-2966.49	3520.12	-3497.86
3520.22	-207.878	3520.22	-1167.75	3520.22	-2303.95	3520.22	-2789.44	3520.22	-3304.62
3520.31	-206.285	3520.31	-1135.87	3520.31	-2250.67	3520.31	-2871.28	3520.31	-3339.87
3520.41	-186.313	3520.41	-1303.96	3520.41	-2139.7	3520.41	-2657.58	3520.41	-3357.1
3520.51	-193.828	3520.51	-1050.34	3520.51	-2029.27	3520.51	-2650.91	3520.51	-3300.28
3520.61	-159.852	3520.61	-1197.54	3520.61	-1837.64	3520.61	-2738.61	3520.61	-3355.08
3520.7	-169.929	3520.7	-1135.97	3520.7	-1817.74	3520.7	-2556.83	3520.7	-3081.35
3520.8	-140.761	3520.8	-1134.75	3520.8	-1887.59	3520.8	-2530.2	3520.8	-2903.04
3520.9	-173.931	3520.9	-876.785	3520.9	-1936.52	3520.9	-2320.74	3520.9	-2959.17
3521	-170.198	3521	-1138.59	3521	-1787.64	3521	-2210.28	3521	-2963.87
3521.09	-118.564	3521.09	-1142.86	3521.09	-1674.55	3521.09	-2177.72	3521.09	-2944.74
3521.19	-130.25	3521.19	-1051	3521.19	-1811.96	3521.19	-2094.96	3521.19	-3032.6
3521.29	-134.214	3521.29	-792.11	3521.29	-1766.27	3521.29	-2185.32	3521.29	-2846.74
3521.39	-198.618	3521.39	-742.79	3521.39	-1721.27	3521.39	-2257.07	3521.39	-2600.66
3521.49	-165.739	3521.49	-1003.04	3521.49	-1755.26	3521.49	-2167.61	3521.49	-2441.44
3521.58	-148.698	3521.58	-760.942	3521.58	-1854.13	3521.58	-2003.94	3521.58	-2416.07
3521.68	-136.573	3521.68	-674.403	3521.68	-1781.58	3521.68	-2033.73	3521.68	-2397.74
3521.78	-123.324	3521.78	-765.414	3521.78	-1474.38	3521.78	-1829.79	3521.78	-2410.13
3521.88	-134.81	3521.88	-880.37	3521.88	-1486.23	3521.88	-1822.48	3521.88	-2307.72
3521.97	-137.489	3521.97	-705.364	3521.97	-1408.71	3521.97	-1763.21	3521.97	-2323.91
3522.07	-124.901	3522.07	-897.192	3522.07	-1323.73	3522.07	-1654.55	3522.07	-2203.36
3522.17	-136.825	3522.17	-764.747	3522.17	-1422.36	3522.17	-1653.3	3522.17	-2346.07
3522.27	-127.861	3522.27	-690.527	3522.27	-1502.8	3522.27	-1577.65	3522.27	-2291.83
3522.37	-127.486	3522.37	-728.524	3522.37	-1416.44	3522.37	-1820.48	3522.37	-2050.82
3522.46	-148.302	3522.46	-865.436	3522.46	-1307.87	3522.46	-1723.78	3522.46	-2078.42
3522.56	-121.826	3522.56	-885.558	3522.56	-1095.18	3522.56	-1565.94	3522.56	-2054.12
3522.66	-54.7783	3522.66	-505.786	3522.66	-1087.37	3522.66	-1502.26	3522.66	-2133.92
3522.76	-123.458	3522.76	-581.915	3522.76	-1297.63	3522.76	-1418.22	3522.76	-2038.79
3522.85	-75.8245	3522.85	-481.34	3522.85	-1213.94	3522.85	-1465.11	3522.85	-2063.83
3522.95	-74.1567	3522.95	-354.657	3522.95	-1228.8	3522.95	-1502.82	3522.95	-1995.22
3523.05	-29.7338	3523.05	-543.659	3523.05	-1194.19	3523.05	-1452.73	3523.05	-1758.74
3523.15	-73.1746	3523.15	-680.841	3523.15	-1088.91	3523.15	-1605.24	3523.15	-1684.87
3523.25	-64.0182	3523.25	-594.096	3523.25	-937.648	3523.25	-1240.03	3523.25	-1535.3
3523.34	-84.6231	3523.34	-696.117	3523.34	-1023.18	3523.34	-1254.57	3523.34	-1670.31
3523.44	-92.5281	3523.44	-535.195	3523.44	-1149.69	3523.44	-1155.95	3523.44	-1604.26
3523.54	-82.0516	3523.54	-461.921	3523.54	-1177.27	3523.54	-1267.75	3523.54	-1798.03
3523.64	-61.9321	3523.64	-454.785	3523.64	-1101.7	3523.64	-1383.44	3523.64	-1535.3
3523.73	-98.6078	3523.73	-483.379	3523.73	-1014.55	3523.73	-1439.31	3523.73	-1322.23
3523.83	-43.497	3523.83	-515.19	3523.83	-939.71	3523.83	-1285.13	3523.83	-1232.6
3523.93	-81.2979	3523.93	-433.51	3523.93	-834.658	3523.93	-1171.16	3523.93	-1412.47
3524.03	-96.4686	3524.03	-557.226	3524.03	-854.673	3524.03	-1108.4	3524.03	-1438.52
3524.13	-75.9074	3524.13	-631.227	3524.13	-904.233	3524.13	-943.502	3524.13	-1282.7
3524.22	-100.052	3524.22	-554.204	3524.22	-1024.92	3524.22	-1179.65	3524.22	-1342.89
3524.32	-89.802	3524.32	-546.846	3524.32	-1067.71	3524.32	-1088.33	3524.32	-1400.06
3524.42	-101.274	3524.42	-567.043	3524.42	-877.29	3524.42	-829.001	3524.42	-1276.37
3524.52	-90.5681	3524.52	-271.385	3524.52	-777.338	3524.52	-781.351	3524.52	-1251.91
3524.61	-59.5217	3524.61	-321.465	3524.61	-668.339	3524.61	-1025.16	3524.61	-1286.84
3524.71	-89.9539	3524.71	-343.275	3524.71	-747.479	3524.71	-860.706	3524.71	-1329.85
3524.81	-72.3034	3524.81	-422.507	3524.81	-651.644	3524.81	-839.176	3524.81	-1240.72
3524.91	-34.5894	3524.91	-391.755	3524.91	-826.522	3524.91	-981.954	3524.91	-1194.91
3525	-61.9308	3525	-329.115	3525	-858.103	3525	-853.228	3525	-1017.53
3525.1	-88.367	3525.1	-288.181	3525.1	-721.079	3525.1	-807.987	3525.1	-1077.35
3525.2	-68.8171	3525.2	-314.749	3525.2	-621.64	3525.2	-884.821	3525.2	-833.771
3525.3	-41.1006	3525.3	-384.416	3525.3	-713.682	3525.3	-1060.42	3525.3	-1047.37
3525.4	-37.217	3525.4	-426.479	3525.4	-677.197	3525.4	-966.482	3525.4	-1159.05
3525.49	-34.5259	3525.49	-436.234	3525.49	-514.58	3525.49	-722.995	3525.49	-1197.59
3525.59	-19.9266	3525.59	-330.68	3525.59	-692.326	3525.59	-746.455	3525.59	-975.39
3525.69	-51.5389	3525.69	-223.213	3525.69	-696.231	3525.69	-894.456	3525.69	-868.641
3525.79	-4.38226	3525.79	-282.831	3525.79	-653.988	3525.79	-942.69	3525.79	-943.333
3525.88	-13.4561	3525.88	-267.63	3525.88	-717.991	3525.88	-1017.75	3525.88	-1068.16
3525.98	-68.3399	3525.98	-297.807	3525.98	-584.835	3525.98	-974.829	3525.98	-953.307
3526.08	-59.5929	3526.08	-497.159	3526.08	-515.912	3526.08	-824.118	3526.08	-667.668
3526.18	-81.1946	3526.18	-401.881	3526.18	-528.314	3526.18	-658.406	3526.18	-817.829
3526.28	-105.064	3526.28	-271.869	3526.28	-362.632	3526.28	-651.184	3526.28	-791.375
3526.37	-48.6206	3526.37	-208.517	3526.37	-311.657	3526.37	-531.138	3526.37	-911.093
3526.47	-37.7432	3526.47	-373.62	3526.47	-616.478	3526.47	-484.457	3526.47	-995.966
3526.57	-38.7708	3526.57	-335.773	3526.57	-596.084	3526.57	-369.326	3526.57	-837.178
3526.67	-63.0425	3526.67	-361.768	3526.67	-611.263	3526.67	-472.531	3526.67	-664.91
3526.76	-46.1573	3526.76	-612.801	3526.76	-649.904	3526.76	-566.859	3526.76	-564.445
3526.86	-42.9741	3526.86	-523.365	3526.86	-643.896	3526.86	-543.295	3526.86	-672.564
3526.96	-68.5518	3526.96	-352.254	3526.96	-515.726	3526.96	-581.023	3526.96	-755.65
3527.06	-62.1296	3527.06	-309.761	3527.06	-698.683	3527.06	-570.431	3527.06	-828.285
3527.16	-66.8264	3527.16	-91.6823	3527.16	-755.356	3527.16	-631.506	3527.16	-935.953
3527.25	-45.3414	3527.25	-187.911	3527.25	-483.936	3527.25	-677.134	3527.25	-918.739
3527.35	-36.2938	3527.35	-243.844	3527.35	-356.414	3527.35	-610.206	3527.35	-759.728
3527.45	-54.8429	3527.45	-284.176	3527.45	-319.382	3527.45	-534.212	3527.45	-692.11
3527.55	-36.8481	3527.55	-222.704	3527.55	-287.133	3527.55	-409.842	3527.55	-765.373
3527.64	-55.1689	3527.64	-347.525	3527.64	-246.461	3527.64	-451.891	3527.64	-680.11
3527.74	-20.685	3527.74	-279.437	3527.74	-276.763	3527.74	-551.353	3527.74	-681.212
3527.84	-4.01603	3527.84	-106.838	3527.84	-475.134	3527.84	-562.224	3527.84	-605.575
3527.94	-44.6218	3527.94	-154.826	3527.94	-323.373	3527.94	-573.2	3527.94	-647.496
3528.04	-3.72209	3528.04	-343.701	3528.04	-350.377	3528.04	-571.081	3528.04	-547.371
3528.13	-38.4169	3528.13	-377.862	3528.13	-259.546	3528.13	-314.363	3528.13	-705.1
3528.23	-56.0462	3528.23	-354.009	3528.23	-218.479	3528.23	-305.848	3528.23	-534.981
3528.33	-40.1699	3528.33	-254.142	3528.33	-362.176	3528.33	-332.135	3528.33	-641.314
3528.43	-27.928	3528.43	-298.661	3528.43	-221.937	3528.43	-504.823	3528.43	-710.799
3528.52	-24.7205	3528.52	-325.465	3528.52	-331.362	3528.52	-504.712	3528.52	-572.235
3528.62	-23.2273	3528.62	-204.555	3528.62	-339.648	3528.62	-410.1	3528.62	-572.221
3528.72	-19.6483	3528.72	-327.429	3528.72	-394.497	3528.72	-327.588	3528.72	-549.155
3528.82	2.4967	3528.82	-119.886	3528.82	-332.804	3528.82	-374.071	3528.82	-610.934
3528.92	10.5479	3528.92	-242.425	3528.92	-237.068	3528.92	-478.547	3528.92	-740.755
3529.01	-28.6144	3529.01	-15.7451	3529.01	-372.786	3529.01	-385.112	3529.01	-517.91
3529.11	-51.7099	3529.11	-36.643	3529.11	-336.153	3529.11	-375.06	3529.11	-428.696
3529.21	-28.898	3529.21	-146.516	3529.21	-406.664	3529.21	-360.786	3529.21	-513.103
3529.31	-55.5983	3529.31	-236.062	3529.31	-293.714	3529.31	-396.582	3529.31	-449.523
3529.4	-64.6303	3529.4	-196.478	3529.4	-282.596	3529.4	-170.141	3529.4	-589.346
3529.5	-33.3934	3529.5	-293.959	3529.5	-428.504	3529.5	-275.454	3529.5	-589.464
3529.6	1.77307	3529.6	-318.703	3529.6	-232.231	3529.6	-391.915	3529.6	-624.064
3529.7	-4.63035	3529.7	-332.405	3529.7	-259.67	3529.7	-589.713	3529.7	-502.937
3529.79	-34.603	3529.79	-191.962	3529.79	-200.815	3529.79	-598.241	3529.79	-222.172
3529.89	-17.1644	3529.89	-64.7717	3529.89	-264.858	3529.89	-470.291	3529.89	-425.959
3529.99	-43.474	3529.99	-157.63	3529.99	-239.395	3529.99	-463.354	3529.99	-549.689
3530.09	-46.8913	3530.09	-279.734	3530.09	-181.319	3530.09	-317.626	3530.09	-546.853
3530.19	7.04409	3530.19	-150.481	3530.19	-163.026	3530.19	-261.2	3530.19	-588.746
3530.28	-15.3275	3530.28	39.6303	3530.28	-197.712	3530.28	-224.771	3530.28	-353.159
3530.38	-28.1057	3530.38	-62.7984	3530.38	-156.275	3530.38	-222.636	3530.38	-158.49
3530.48	-31.2305	3530.48	-217.866	3530.48	-289.711	3530.48	-264.792	3530.48	-102.335
3530.58	-23.6417	3530.58	-147.472	3530.58	-396.721	3530.58	-245.238	3530.58	-400.593
3530.67	-19.8993	3530.67	-123.615	3530.67	-321.303	3530.67	-239.873	3530.67	-311.262
3530.77	-30.5234	3530.77	-51.6974	3530.77	-328.458	3530.77	-142.598	3530.77	-357.543
3530.87	-33.0939	3530.87	-119.618	3530.87	-171.287	3530.87	-233.713	3530.87	-425.337
3530.97	-36.451	3530.97	-27.678	3530.97	-297.692	3530.97	-172.621	3530.97	-373.947
3531.07	-50.7149	3531.07	-253.878	3531.07	-271.573	3531.07	-7.12408	3531.07	-251.376
3531.16	-20.8857	3531.16	-345.819	3531.16	-364.932	3531.16	-185.923	3531.16	-308.625
3531.26	5.49641	3531.26	45.1974	3531.26	-352.171	3531.26	-304.121	3531.26	-505.797
3531.36	-18.8686	3531.36	-111.128	3531.36	-59.5922	3531.36	-237.918	3531.36	-424.194
3531.46	-63.9609	3531.46	-92.8973	3531.46	-204.295	3531.46	-127.717	3531.46	-229.117
3531.55	-48.6004	3531.55	18.9905	3531.55	-238.781	3531.55	-373.518	3531.55	-225.868
3531.65	-30.3672	3531.65	-60.665	3531.65	-359.25	3531.65	-502.82	3531.65	-277.846
3531.75	-15.5012	3531.75	-202.863	3531.75	-304.9	3531.75	-531.523	3531.75	-311.649
3531.85	-36.7422	3531.85	-250.003	3531.85	-96.5298	3531.85	-446.124	3531.85	-376.175
3531.95	-66.45	3531.95	-106.284	3531.95	-155.538	3531.95	-341.02	3531.95	-297.921
3532.04	-38.3445	3532.04	-17.3039	3532.04	-296.02	3532.04	-239.108	3532.04	-285.281
3532.14	-33.6452	3532.14	-276.461	3532.14	-265.774	3532.14	-350.984	3532.14	-360.751
3532.24	-0.89178	3532.24	-266.353	3532.24	-204.894	3532.24	-285.643	3532.24	-337.424
3532.34	-17.6639	3532.34	-362.178	3532.34	-315.978	3532.34	-167.779	3532.34	-388.794
3532.43	-40.8211	3532.43	-127.034	3532.43	-252.119	3532.43	-88.5856	3532.43	-240.753
3532.53	-25.2431	3532.53	40.8825	3532.53	-157.514	3532.53	-156.658	3532.53	-295.994
3532.63	-15.3093	3532.63	127.973	3532.63	-199.858	3532.63	-206.791	3532.63	-576.31
3532.73	-59.8394	3532.73	-52.859	3532.73	-173.946	3532.73	-185.279	3532.73	-366.894
3532.82	-54.7332	3532.82	-67.5128	3532.82	-124.575	3532.82	-20.3166	3532.82	-297.141
3532.92	-5.43023	3532.92	-149.686	3532.92	-293.242	3532.92	-286.3	3532.92	-316.646
3533.02	-16.7903	3533.02	-164.378	3533.02	-280.843	3533.02	-231.727	3533.02	-392.304
3533.12	-63.9933	3533.12	-87.4861	3533.12	-147.977	3533.12	-387.193	3533.12	-231.212
3533.22	-23.7789	3533.22	-23.711	3533.22	-139.142	3533.22	-278.398	3533.22	-234.268
3533.31	-19.8473	3533.31	-93.252	3533.31	-200.337	3533.31	-323.441	3533.31	-209.172
3533.41	-22.5385	3533.41	-164.109	3533.41	-332.964	3533.41	-185.221	3533.41	-232.322
3533.51	-56.3124	3533.51	138.417	3533.51	-133.122	3533.51	-124.241	3533.51	-315.022
3533.61	-48.3092	3533.61	-195.174	3533.61	-341.713	3533.61	-349.901	3533.61	-195.472
3533.7	-52.2891	3533.7	-264.183	3533.7	-274.139	3533.7	-166.004	3533.7	-105.876
3533.8	-70.4122	3533.8	-273.112	3533.8	-68.3022	3533.8	-198.953	3533.8	-233.236
3533.9	-26.0387	3533.9	-226.461	3533.9	-189.504	3533.9	-180.949	3533.9	-243.757
3534	-22.4089	3534	-63.2314	3534	-34.4475	3534	24.6038	3534	-196.741
3534.1	3.33705	3534.1	-54.9248	3534.1	-137.034	3534.1	-34.1969	3534.1	-89.9918
3534.19	-34.7809	3534.19	-303.442	3534.19	-357.066	3534.19	-124.653	3534.19	-90.3123
3534.29	-10.9831	3534.29	-117.584	3534.29	-117.045	3534.29	-227.067	3534.29	-432.505
3534.39	-32.3294	3534.39	52.65	3534.39	-206.271	3534.39	-284.339	3534.39	-282.37
3534.49	-33.3199	3534.49	106.858	3534.49	-193.046	3534.49	-252.971	3534.49	-412.709
3534.58	-15.0946	3534.58	39.4418	3534.58	-103.767	3534.58	-176.461	3534.58	-208.322
3534.68	-23.2734	3534.68	-77.6992	3534.68	-197.736	3534.68	-200.308	3534.68	-144.706
3534.78	-12.4362	3534.78	-299.064	3534.78	-141.65	3534.78	-338.311	3534.78	-259.56
3534.88	-44.4028	3534.88	-137.351	3534.88	-13.7065	3534.88	-75.9668	3534.88	-348.879
3534.98	10.3071	3534.98	-9.05919	3534.98	-215.803	3534.98	-147.172	3534.98	-261.861
3535.07	-41.3063	3535.07	44.4131	3535.07	-100.038	3535.07	-58.6232	3535.07	-178.6
3535.17	-37.5227	3535.17	12.9677	3535.17	-204.606	3535.17	0.68414	3535.17	-111.79
3535.27	-62.1617	3535.27	-133.194	3535.27	-230.504	3535.27	-128.546	3535.27	-161.028
3535.37	-38.4831	3535.37	-110.869	3535.37	-294.029	3535.37	-76.5085	3535.37	-250.906
3535.46	-6.50657	3535.46	-112.856	3535.46	18.1227	3535.46	78.0001	3535.46	-256.621
3535.56	18.1082	3535.56	24.1457	3535.56	111.354	3535.56	-203.316	3535.56	-124.066
3535.66	3.98151	3535.66	-94.5613	3535.66	-120.731	3535.66	-19.4533	3535.66	-56.2372
3535.76	0.45348	3535.76	86.2239	3535.76	-117.632	3535.76	-114.509	3535.76	-126.732
3535.86	11.7043	3535.86	118.502	3535.86	-4.64524	3535.86	-139.681	3535.86	5.25371
3535.95	12.0341	3535.95	-68.9256	3535.95	7.82929	3535.95	-8.36684	3535.95	-68.3792
3536.05	-8.47717	3536.05	-171.759	3536.05	-237.408	3536.05	-125.867	3536.05	-269.93
3536.15	-5.36941	3536.15	-121.999	3536.15	-243.356	3536.15	-249.982	3536.15	-126.198
3536.25	-41.4027	3536.25	58.7546	3536.25	-248.416	3536.25	-342.211	3536.25	-83.4843
3536.34	7.50279	3536.34	-110.899	3536.34	-151.89	3536.34	-153.957	3536.34	-136.192
3536.44	8.24697	3536.44	-216.76	3536.44	-57.3792	3536.44	-119.621	3536.44	-249.922
3536.54	-31.6104	3536.54	-169.13	3536.54	-220.185	3536.54	-201.207	3536.54	-154.179
3536.64	-8.58939	3536.64	-25.1101	3536.64	-283.211	3536.64	-204.016	3536.64	-224.766
3536.74	-0.09034	3536.74	-41.1018	3536.74	41.142	3536.74	-261.552	3536.74	-279.286
3536.83	-28.2134	3536.83	1.59397	3536.83	195.471	3536.83	-89.018	3536.83	-272.443
3536.93	18.5412	3536.93	47.876	3536.93	-4.52697	3536.93	35.884	3536.93	-307.141
3537.03	-1.16664	3537.03	75.5432	3537.03	86.4473	3537.03	-86.6487	3537.03	-151.482
3537.13	9.6229	3537.13	144.295	3537.13	-73.8081	3537.13	-200.718	3537.13	-149.168
3537.22	-30.8703	3537.22	-105.669	3537.22	-16.9941	3537.22	-57.3245	3537.22	70.3987
3537.32	-16.0462	3537.32	-71.9499	3537.32	-133.811	3537.32	-38.0695	3537.32	-141.383
3537.42	-5.76477	3537.42	-264.847	3537.42	-83.2591	3537.42	110.747	3537.42	-246.111
3537.52	12.234	3537.52	-232.559	3537.52	-75.5374	3537.52	-142.473	3537.52	-372.587
3537.61	0.39012	3537.61	-110.087	3537.61	-62.1447	3537.61	-53.0288	3537.61	-406.707
3537.71	7.28389	3537.71	-28.7291	3537.71	13.2209	3537.71	-10.2182	3537.71	-168.368
3537.81	-26.4845	3537.81	29.4158	3537.81	-268.839	3537.81	104.062	3537.81	11.1316
3537.91	-13.8749	3537.91	-208.451	3537.91	-329.02	3537.91	15.7142	3537.91	66.8971
3538.01	19.773	3538.01	-180.328	3538.01	-199.822	3538.01	93.9426	3538.01	-169.567
3538.1	6.01941	3538.1	-50.3138	3538.1	-145.239	3538.1	-142.749	3538.1	-316.357
3538.2	-25.4154	3538.2	-96.0066	3538.2	-172.471	3538.2	-275.958	3538.2	-195.268
3538.3	-24.1911	3538.3	-243.605	3538.3	-9.81316	3538.3	-79.88	3538.3	-212.196
3538.4	-10.7075	3538.4	-148.908	3538.4	51.1364	3538.4	-182.312	3538.4	-13.2358
3538.49	9.95555	3538.49	-3.71375	3538.49	-146.42	3538.49	-6.15147	3538.49	0.01501
3538.59	18.6782	3538.59	-16.0218	3538.59	-149.481	3538.59	-168.296	3538.59	-25.8407
3538.69	-6.25936	3538.69	-167.431	3538.69	2.3559	3538.69	-214.744	3538.69	-146.301
3538.79	3.74287	3538.79	-263.742	3538.79	115.79	3538.79	-53.1949	3538.79	-45.3643
3538.89	19.0249	3538.89	-120.354	3538.89	-11.7775	3538.89	-166.548	3538.89	11.5691
3538.98	9.28675	3538.98	31.9329	3538.98	-236.748	3538.98	-80.4045	3538.98	-11.3013
3539.08	-3.99172	3539.08	4.11799	3539.08	-245.421	3539.08	18.935	3539.08	-220.977
3539.18	-59.8306	3539.18	-53.6994	3539.18	-248.3	3539.18	24.8686	3539.18	-165.26
3539.28	-68.1901	3539.28	-72.1203	3539.28	-96.0846	3539.28	59.294	3539.28	-12.3531
3539.37	-27.8303	3539.37	-30.9457	3539.37	-11.4783	3539.37	-199.791	3539.37	-38.6597
3539.47	1.46848	3539.47	-67.3769	3539.47	-217.283	3539.47	-249.49	3539.47	-266.683
3539.57	-13.7339	3539.57	84.785	3539.57	-153.401	3539.57	-114.905	3539.57	-233.227
3539.67	32.1424	3539.67	-14.4612	3539.67	-53.3344	3539.67	61.2609	3539.67	-225.995
3539.77	-3.38292	3539.77	124.883	3539.77	-19.0854	3539.77	69.6051	3539.77	4.41068
3539.86	-23.9699	3539.86	23.7177	3539.86	-59.4559	3539.86	-133.175	3539.86	-140.314
3539.96	-27.3387	3539.96	-37.0588	3539.96	-56.1471	3539.96	-294.48	3539.96	-43.1704
3540.06	-47.9695	3540.06	-269.447	3540.06	-101.56	3540.06	-115.812	3540.06	-133.26
3540.16	-20.4822	3540.16	-304.246	3540.16	42.8048	3540.16	-225.571	3540.16	-167.284
3540.25	-10.3768	3540.25	-185.857	3540.25	180.048	3540.25	-232.457	3540.25	-156.242
3540.35	-51.3533	3540.35	-75.6794	3540.35	13.069	3540.35	-231.97	3540.35	-300.733
3540.45	-28.3316	3540.45	-128.112	3540.45	65.37	3540.45	-158.208	3540.45	-135.355
3540.55	-30.7115	3540.55	31.945	3540.55	92.2524	3540.55	-148.568	3540.55	-99.3062
3540.65	2.68704	3540.65	-82.7064	3540.65	104.318	3540.65	-62.7496	3540.65	-202.383
3540.74	-27.2956	3540.74	-163.565	3540.74	179.169	3540.74	51.3515	3540.74	-102.781
3540.84	-39.1794	3540.84	-64.9305	3540.84	114.009	3540.84	-9.86199	3540.84	-63.3982
3540.94	-15.0839	3540.94	45.0994	3540.94	-113.861	3540.94	-100.187	3540.94	34.5707
3541.04	1.03096	3541.04	0.42593	3541.04	57.3625	3541.04	-84.72	3541.04	77.7293
3541.13	-12.3146	3541.13	41.4502	3541.13	-44.3183	3541.13	-28.8584	3541.13	-174.519
3541.23	19.5598	3541.23	-143.427	3541.23	-99.6012	3541.23	-22.9993	3541.23	-192.87
3541.33	-21.5459	3541.33	-35.1036	3541.33	-64.4843	3541.33	-59.7405	3541.33	73.9787
3541.43	-4.27154	3541.43	0.42006	3541.43	-106.966	3541.43	21.6198	3541.43	-76.8709
3541.52	-32.8969	3541.52	-69.7551	3541.52	65.3542	3541.52	-123.917	3541.52	-178.417
3541.62	-25.0221	3541.62	-200.929	3541.62	-6.72295	3541.62	-82.7511	3541.62	-137.06
3541.72	-37.7271	3541.72	-61.8015	3541.72	-119.198	3541.72	-166.482	3541.72	-67.798
3541.82	-30.8919	3541.82	-67.473	3541.82	-79.8702	3541.82	-191.71	3541.82	-34.8334
3541.92	-12.9966	3541.92	-53.044	3541.92	-60.342	3541.92	-150.837	3541.92	-94.5675
3542.01	-4.48136	3542.01	-168.715	3542.01	-90.2144	3542.01	-81.5656	3542.01	-245.403
3542.11	0.67366	3542.11	114.812	3542.11	-32.9892	3542.11	-288.197	3542.11	-187.341
3542.21	-34.1717	3542.21	77.837	3542.21	-200.469	3542.21	-295.233	3542.21	-8.58716
3542.31	-35.9977	3542.31	-112.041	3542.31	-73.0546	3542.31	-225.178	3542.31	27.1568
3542.4	-12.7044	3542.4	-91.6246	3542.4	134.051	3542.4	-143.234	3542.4	-102.213
3542.5	5.06785	3542.5	-1.51355	3542.5	165.245	3542.5	-43.103	3542.5	-206.399
3542.6	-41.881	3542.6	80.6907	3542.6	-96.9743	3542.6	-47.8882	3542.6	-23.3059
3542.7	-9.41115	3542.7	37.5874	3542.7	-150.408	3542.7	-84.7914	3542.7	-112.335
3542.8	22.4773	3542.8	57.0757	3542.8	-267.257	3542.8	-93.3142	3542.8	-129.988
3542.89	-30.2357	3542.89	59.7553	3542.89	29.3767	3542.89	-158.058	3542.89	2.73245
3542.99	3.94977	3542.99	-27.1741	3542.99	-110.707	3542.99	-22.3219	3542.99	-116.373
3543.09	5.45376	3543.09	-16.3124	3543.09	-113.807	3543.09	54.6928	3543.09	3.49539
3543.19	-27.5837	3543.19	-198.359	3543.19	15.2767	3543.19	-98.0125	3543.19	-125.761
3543.28	-19.2425	3543.28	45.5859	3543.28	52.6449	3543.28	12.7633	3543.28	-52.7415
3543.38	-41.7025	3543.38	-172.376	3543.38	51.5993	3543.38	-11.7777	3543.38	89.9572
3543.48	-8.04355	3543.48	-282.344	3543.48	-44.0581	3543.48	-107.133	3543.48	-5.66238
3543.58	0.03454	3543.58	-107.518	3543.58	-14.1253	3543.58	-66.5011	3543.58	8.90304
3543.68	-19.648	3543.68	-144.895	3543.68	20.9	3543.68	-153.678	3543.68	-25.943
3543.77	25.8089	3543.77	-68.275	3543.77	-21.5798	3543.77	-211.961	3543.77	-59.8969
3543.87	-21.9943	3543.87	12.6436	3543.87	-169.762	3543.87	-132.348	3543.87	166.545
3543.97	-4.91763	3543.97	0.56183	3543.97	-151.146	3543.97	-12.9349	3543.97	124.086
3544.07	8.89917	3544.07	47.0808	3544.07	-170.927	3544.07	153.379	3544.07	27.1285
3544.16	-15.8438	3544.16	20.4012	3544.16	77.1935	3544.16	24.4971	3544.16	-234.324
3544.26	-49.4664	3544.26	218.824	3544.26	104.119	3544.26	12.6199	3544.26	-48.8708
3544.36	-34.1086	3544.36	137.649	3544.36	-115.852	3544.36	-209.151	3544.36	-38.01
3544.46	-12.4303	3544.46	21.2765	3544.46	-47.3169	3544.46	-292.017	3544.46	-215.041
3544.56	-27.1516	3544.56	6.90672	3544.56	81.6228	3544.56	-238.776	3544.56	34.6345
3544.65	7.70746	3544.65	-40.6609	3544.65	154.367	3544.65	2.56996	3544.65	-31.4832
3544.75	-21.6532	3544.75	-43.627	3544.75	-189.387	3544.75	-184.481	3544.75	-35.3964
3544.85	6.72621	3544.85	7.80768	3544.85	-192.039	3544.85	-177.629	3544.85	38.5927
3544.95	13.7256	3544.95	-217.958	3544.95	-75.6907	3544.95	-126.478	3544.95	84.8812
3545.04	21.5448	3545.04	-256.425	3545.04	-201.345	3545.04	-29.9305	3545.04	-113.734
3545.14	-73.8963	3545.14	-104.194	3545.14	-282.004	3545.14	-150.888	3545.14	-215.856
3545.24	-19.2581	3545.24	45.434	3545.24	-274.87	3545.24	-26.6535	3545.24	-171.088
3545.34	14.6194	3545.34	45.8571	3545.34	10.5564	3545.34	129.37	3545.34	47.9674
3545.44	-18.644	3545.44	47.7747	3545.44	63.072	3545.44	-229.418	3545.44	-112.194
3545.53	-43.1685	3545.53	-188.114	3545.53	44.0758	3545.53	-154.722	3545.53	56.6273
3545.63	11.4859	3545.63	-37.1092	3545.63	43.7666	3545.63	-239.941	3545.63	108.128
3545.73	1.03907	3545.73	2.28819	3545.73	-39.9564	3545.73	-78.1773	3545.73	-90.2922
3545.83	-39.689	3545.83	-73.6217	3545.83	-156.593	3545.83	-200.031	3545.83	-104.234
3545.92	-20.0383	3545.92	-85.9389	3545.92	-46.7443	3545.92	-176.701	3545.92	6.90265
3546.02	31.0713	3546.02	-175.763	3546.02	-182.808	3546.02	35.5118	3546.02	0.31912
3546.12	11.7998	3546.12	-181.993	3546.12	-166.585	3546.12	-110.19	3546.12	-47.083
3546.22	-11.5926	3546.22	-176.329	3546.22	-26.6715	3546.22	-24.3047	3546.22	64.1984
3546.31	-27.7059	3546.31	-158.17	3546.31	-175.267	3546.31	101.169	3546.31	41.9662
3546.41	-29.0397	3546.41	-142.014	3546.41	-164.67	3546.41	174.635	3546.41	-225.477
3546.51	7.64605	3546.51	-63.5613	3546.51	15.7227	3546.51	61.8951	3546.51	-148.227
3546.61	5.31158	3546.61	-48.6094	3546.61	-118.387	3546.61	12.5518	3546.61	-34.3808
3546.71	16.3771	3546.71	123.142	3546.71	-99.1976	3546.71	-97.0919	3546.71	-102.236
3546.8	-17.0173	3546.8	131.195	3546.8	-195.907	3546.8	-34.0339	3546.8	-15.488
3546.9	-2.23141	3546.9	88.3488	3546.9	-12.3122	3546.9	68.8282	3546.9	-43.5354
3547	-22.6251	3547	156.905	3547	24.9868	3547	-61.9041	3547	203.724
3547.1	-10.7583	3547.1	70.2649	3547.1	-113.609	3547.1	-113.129	3547.1	197.593
3547.19	6.50906	3547.19	30.1276	3547.19	-66.3979	3547.19	49.8528	3547.19	26.1703
3547.29	-11.683	3547.29	-118.906	3547.29	7.7192	3547.29	193.843	3547.29	-62.6422
3547.39	-3.77461	3547.39	-126.737	3547.39	-175.458	3547.39	-147.26	3547.39	29.5544
3547.49	23.9343	3547.49	62.1346	3547.49	-15.3296	3547.49	-102.156	3547.49	-15.741
3547.59	-24.9365	3547.59	13.6085	3547.59	-203.997	3547.59	-29.5477	3547.59	-28.9303
3547.68	-20.027	3547.68	-38.4162	3547.68	-62.7628	3547.68	-112.336	3547.68	-59.7158
3547.78	3.88247	3547.78	55.8594	3547.78	103.373	3547.78	-14.3236	3547.78	6.39984
3547.88	-7.34812	3547.88	42.6344	3547.88	165.807	3547.88	-114.513	3547.88	44.2136
3547.98	-1.599	3547.98	9.60765	3547.98	64.5376	3547.98	-83.5056	3547.98	93.5224
3548.07	-13.4503	3548.07	-8.52182	3548.07	-30.0367	3548.07	-51.905	3548.07	-78.177
3548.17	-11.4423	3548.17	128.045	3548.17	-23.9182	3548.17	62.1867	3548.17	-55.7872
3548.27	-22.0551	3548.27	126.107	3548.27	151.092	3548.27	-57.1323	3548.27	10.789
3548.37	5.8913	3548.37	-98.936	3548.37	114.791	3548.37	-28.3639	3548.37	103.349
3548.47	28.0767	3548.47	-116.785	3548.47	-13.7207	3548.47	10.7906	3548.47	7.69266
3548.56	18.741	3548.56	60.5597	3548.56	-154.244	3548.56	-36.0694	3548.56	-90.0824
3548.66	33.9843	3548.66	45.6981	3548.66	-163.08	3548.66	-56.9442	3548.66	-93.676
3548.76	22.0465	3548.76	-34.3697	3548.76	71.9725	3548.76	-64.3337	3548.76	21.6123
3548.86	41.4277	3548.86	-44.2433	3548.86	108.314	3548.86	-27.6368	3548.86	-3.21661
3548.95	-12.9119	3548.95	117.278	3548.95	114.345	3548.95	-68.0523	3548.95	-78.761
3549.05	6.30769	3549.05	168.894	3549.05	5.86791	3549.05	40.2217	3549.05	-158.319
3549.15	19.7467	3549.15	240.307	3549.15	-36.7163	3549.15	13.3871	3549.15	52.2132
3549.25	-0.25477	3549.25	130.318	3549.25	-61.6055	3549.25	-123.754	3549.25	-175.463
3549.34	1.86352	3549.34	-38.3733	3549.34	86.2023	3549.34	-56.198	3549.34	-175.443
3549.44	-7.01827	3549.44	-189.665	3549.44	-131.791	3549.44	114.457	3549.44	-52.825
3549.54	30.88	3549.54	97.7439	3549.54	-80.8827	3549.54	71.8124	3549.54	-17.4052
3549.64	14.8186	3549.64	20.5544	3549.64	-1.67186	3549.64	14.6718	3549.64	-51.981
3549.74	-6.52246	3549.74	-80.9329	3549.74	7.94344	3549.74	-100.663	3549.74	-114.35
3549.83	-14.983	3549.83	119.283	3549.83	-140.536	3549.83	44.8083	3549.83	-204.11
3549.93	-12.503	3549.93	68.0019	3549.93	-18.9081	3549.93	-51.0119	3549.93	-90.4605
3550.03	7.79763	3550.03	-12.9754	3550.03	-54.8737	3550.03	-103.724	3550.03	-57.7001
3550.13	7.83887	3550.13	-27.049	3550.13	-26.6324	3550.13	-209.227	3550.13	-37.7291
3550.22	19.4407	3550.22	25.3808	3550.22	-44.1846	3550.22	-291.822	3550.22	49.352
3550.32	1.383	3550.32	210.914	3550.32	-46.131	3550.32	-134.01	3550.32	84.4418
3550.42	-10.8543	3550.42	8.54866	3550.42	101.227	3550.42	-82.6927	3550.42	-56.2615
3550.52	-18.4513	3550.52	-8.3147	3550.52	-137.312	3550.52	-220.672	3550.52	-20.9603
3550.62	-1.32826	3550.62	73.6226	3550.62	-134.45	3550.62	34.2507	3550.62	15.6427
3550.71	-45.0652	3550.71	63.1595	3550.71	-89.8885	3550.71	20.5723	3550.71	-75.8552
3550.81	-40.5625	3550.81	161.395	3550.81	58.1704	3550.81	58.7907	3550.81	-67.9573
3550.91	-12.7801	3550.91	134.728	3550.91	-37.5753	3550.91	-144.096	3550.91	-195.766
3551.01	14.2617	3551.01	-20.5419	3551.01	-77.0273	3551.01	-77.5914	3551.01	-51.7849
3551.1	-18.2371	3551.1	-11.4162	3551.1	-70.9872	3551.1	-36.6961	3551.1	2.98423
3551.2	-15.7768	3551.2	-179.995	3551.2	-88.1562	3551.2	145.388	3551.2	15.0393
3551.3	-20.0974	3551.3	-84.4796	3551.3	-121.535	3551.3	34.6596	3551.3	-9.22113
3551.4	-27.0189	3551.4	1.73048	3551.4	-206.225	3551.4	-73.2818	3551.4	66.8021
3551.5	-10.9613	3551.5	-41.1651	3551.5	-171.626	3551.5	-75.2364	3551.5	-18.9912
3551.59	-10.8847	3551.59	7.73393	3551.59	101.463	3551.59	-10.6039	3551.59	14.3995
3551.69	-8.62889	3551.69	0.02785	3551.69	136.843	3551.69	131.017	3551.69	155.075
3551.79	-19.6339	3551.79	-42.0827	3551.79	20.3135	3551.79	55.4267	3551.79	202.438
3551.89	26.0805	3551.89	-163.497	3551.89	-203.023	3551.89	13.8279	3551.89	-81.7108
3551.98	23.3944	3551.98	-153.314	3551.98	-100.965	3551.98	254.922	3551.98	-122.568
3552.08	20.828	3552.08	-22.5335	3552.08	74.7895	3552.08	136.712	3552.08	-154.53
3552.18	8.42147	3552.18	-124.854	3552.18	-66.4578	3552.18	0.69999	3552.18	-136.996
3552.28	-10.9051	3552.28	-41.4735	3552.28	-35.0049	3552.28	-49.4119	3552.28	-56.7605
3552.38	16.5086	3552.38	-28.9923	3552.38	-48.5499	3552.38	30.2788	3552.38	-39.5222
3552.47	36.9626	3552.47	-55.1091	3552.47	-40.591	3552.47	-72.6258	3552.47	-175.478
3552.57	15.417	3552.57	-108.223	3552.57	-259.627	3552.57	-146.924	3552.57	40.7743
3552.67	-15.348	3552.67	-107.834	3552.67	-128.457	3552.67	-46.6145	3552.67	155.336
3552.77	7.16759	3552.77	-10.9411	3552.77	50.8208	3552.77	-0.99632	3552.77	48.209
3552.86	3.98385	3552.86	120.856	3552.86	45.8055	3552.86	-103.769	3552.86	112.793
3552.96	-12.0793	3552.96	-6.84379	3552.96	46.9976	3552.96	-52.1328	3552.96	18.3883
3553.06	-4.46175	3553.06	89.1603	3553.06	-119.704	3553.06	-80.5883	3553.06	-110.206
3553.16	-12.7037	3553.16	13.0675	3553.16	-56.3989	3553.16	-32.4366	3553.16	112.109
3553.26	7.33469	3553.26	-154.523	3553.26	16.3104	3553.26	-37.7791	3553.26	-1.26951
3553.35	2.97338	3553.35	-226.312	3553.35	-367.777	3553.35	-217.018	3553.35	-107.843
3553.45	-3.22779	3553.45	-38.1997	3553.45	-101.063	3553.45	-86.6547	3553.45	-170.914
3553.55	-25.789	3553.55	-34.4879	3553.55	28.5501	3553.55	-88.7922	3553.55	-128.486
3553.65	-12.5904	3553.65	44.4226	3553.65	-81.2388	3553.65	-82.2326	3553.65	41.5386
3553.74	7.22778	3553.74	163.431	3553.74	-157.932	3553.74	-187.378	3553.74	-19.9432
3553.84	7.34547	3553.84	-54.9637	3553.84	-115.531	3553.84	-119.331	3553.84	-190.534
3553.94	-18.0175	3553.94	-93.3623	3553.94	129.563	3553.94	-21.8924	3553.94	-164.536
3554.04	-22.5612	3554.04	-84.7652	3554.04	99.1482	3554.04	28.5355	3554.04	-221.251
3554.14	-40.1457	3554.14	-86.0731	3554.14	21.0242	3554.14	-132.748	3554.14	-46.2808
3554.23	-1.57107	3554.23	22.7139	3554.23	97.1903	3554.23	61.1562	3554.23	184.875
3554.33	11.4227	3554.33	-43.5042	3554.33	246.847	3554.33	168.349	3554.33	-36.185
3554.43	0.83562	3554.43	-10.4273	3554.43	109.894	3554.43	183.929	3554.43	-14.7591
3554.53	23.7078	3554.53	104.445	3554.53	50.4318	3554.53	140.299	3554.53	52.2534
3554.62	30.3793	3554.62	90.7135	3554.62	79.9625	3554.62	-4.63998	3554.62	-48.8456
3554.72	10.3703	3554.72	159.079	3554.72	58.4871	3554.72	-139.887	3554.72	-73.0541
3554.82	-42.9592	3554.82	6.74163	3554.82	-17.0928	3554.82	-94.439	3554.82	-63.8694
3554.92	1.61116	3554.92	90.5031	3554.92	-64.9754	3554.92	-121.095	3554.92	55.7112
3555.01	6.48143	3555.01	112.464	3555.01	51.1413	3555.01	-113.551	3555.01	-2.60941
3555.11	-7.6882	3555.11	-192.174	3555.11	80.2592	3555.11	-40.2061	3555.11	-44.3283
3555.21	-5.67758	3555.21	9.88914	3555.21	127.08	3555.21	9.44235	3555.21	-15.0427
3555.31	4.01344	3555.31	110.055	3555.31	114.305	3555.31	-1.90371	3555.31	21.9497
3555.41	29.005	3555.41	-101.277	3555.41	28.8359	3555.41	-171.143	3555.41	-19.349
3555.5	-11.9229	3555.5	-32.9047	3555.5	208.974	3555.5	-48.9733	3555.5	-43.7373
3555.6	0.42984	3555.6	197.371	3555.6	101.319	3555.6	-40.2949	3555.6	118.986
3555.7	2.52328	3555.7	-2.54876	3555.7	103.871	3555.7	-43.7071	3555.7	-153.979
3555.8	-11.5626	3555.8	-48.5649	3555.8	135.732	3555.8	5.1899	3555.8	86.4667
3555.89	-19.9879	3555.89	-185.277	3555.89	-6.60148	3555.89	9.59533	3555.89	-171.076
3555.99	-30.8527	3555.99	-93.1869	3555.99	-57.3285	3555.99	-42.592	3555.99	-232.611
3556.09	-37.9171	3556.09	57.7061	3556.09	108.049	3556.09	-50.8735	3556.09	5.06248
3556.19	-2.32117	3556.19	47.0008	3556.19	-56.8702	3556.19	-168.251	3556.19	65.6404
3556.29	15.5949	3556.29	92.6962	3556.29	-91.788	3556.29	-232.427	3556.29	161.721
3556.38	12.9109	3556.38	47.0914	3556.38	-10.7062	3556.38	39.2966	3556.38	126.8
3556.48	-1.55333	3556.48	-6.01458	3556.48	-96.1266	3556.48	-240.083	3556.48	-212.524
3556.58	7.50213	3556.58	-33.1226	3556.58	-97.351	3556.58	-142.367	3556.58	-40.5538
3556.68	47.5371	3556.68	-218.334	3556.68	-9.68095	3556.68	-51.3574	3556.68	106.308
3556.77	29.1714	3556.77	-174.048	3556.77	30.7821	3556.77	76.9431	3556.77	-133.442
3556.87	-1.43493	3556.87	60.0329	3556.87	27.137	3556.87	205.734	3556.87	71.6965
3556.97	14.7579	3556.97	-4.69055	3556.97	-44.1168	3556.97	102.613	3556.97	-119.379
3557.07	-8.63001	3557.07	100.781	3557.07	-130.28	3557.07	-31.9181	3557.07	-66.3682
3557.17	-0.53876	3557.17	-58.9519	3557.17	-150.552	3557.17	-137.261	3557.17	-56.5716
3557.26	-27.3683	3557.26	-236.189	3557.26	37.1672	3557.26	-137.114	3557.26	39.1116
3557.36	13.0015	3557.36	-24.8312	3557.36	-34.9216	3557.36	-11.4774	3557.36	-13.5174
3557.46	-11.2893	3557.46	26.5235	3557.46	-224.817	3557.46	-92.8488	3557.46	5.3434
3557.56	-8.94054	3557.56	-15.9245	3557.56	-233.818	3557.56	-42.9267	3557.56	-89.204
3557.65	6.34788	3557.65	125.526	3557.65	-92.7221	3557.65	51.191	3557.65	-70.857
3557.75	11.8161	3557.75	-39.4253	3557.75	-61.6283	3557.75	10.7063	3557.75	-76.4128
3557.85	1.42438	3557.85	50.6238	3557.85	77.4655	3557.85	-27.8784	3557.85	-21.7686
3557.95	-25.7272	3557.95	8.47385	3557.95	323.661	3557.95	-121.461	3557.95	100.878
3558.04	-46.7985	3558.04	-46.0743	3558.04	-60.3399	3558.04	-39.7389	3558.04	-29.7693
3558.14	-5.42933	3558.14	80.7802	3558.14	149.164	3558.14	-302.411	3558.14	-66.1093
3558.24	-28.8796	3558.24	13.338	3558.24	115.074	3558.24	-133.475	3558.24	-106.74
3558.34	-50.9693	3558.34	74.4994	3558.34	64.2919	3558.34	-54.6309	3558.34	67.8408
3558.44	-14.5983	3558.44	28.4649	3558.44	-16.6831	3558.44	27.8229	3558.44	-203.567
3558.53	-6.62659	3558.53	-31.7655	3558.53	-39.8502	3558.53	-84.0137	3558.53	-226.863
3558.63	-5.33424	3558.63	-64.592	3558.63	66.2901	3558.63	-105.041	3558.63	36.3531
3558.73	-24.0813	3558.73	6.08514	3558.73	55.5374	3558.73	-132.76	3558.73	49.6796
3558.83	9.95221	3558.83	67.8654	3558.83	127.391	3558.83	127.329	3558.83	-8.68489
3558.92	16.1661	3558.92	-28.752	3558.92	-6.95155	3558.92	88.9227	3558.92	-208.742
3559.02	-42.6597	3559.02	35.7323	3559.02	70.5093	3559.02	99.1206	3559.02	-154.995
3559.12	-17.1255	3559.12	-157.883	3559.12	-32.8284	3559.12	60.3202	3559.12	-54.8454
3559.22	-7.53122	3559.22	-57.298	3559.22	-207.767	3559.22	76.0193	3559.22	-124.597
3559.32	8.00283	3559.32	60.6856	3559.32	-108.007	3559.32	127.216	3559.32	-136.551
3559.41	7.95654	3559.41	68.3671	3559.41	98.9488	3559.41	-141.893	3559.41	-95.1117
3559.51	0.06976	3559.51	98.0458	3559.51	-94.7009	3559.51	-202.408	3559.51	85.1193
3559.61	-11.3576	3559.61	-16.6791	3559.61	-195.657	3559.61	-99.9316	3559.61	23.2399
3559.71	9.09432	3559.71	4.89193	3559.71	-11.2218	3559.71	-5.56473	3559.71	-198.352
3559.8	-20.4745	3559.8	15.1585	3559.8	141.405	3559.8	-159.908	3559.8	-141.556
3559.9	-3.42406	3559.9	-10.2794	3559.9	10.7238	3559.9	-151.763	3559.9	-165.774
3560	6.44561	3560	-44.3219	3560	-35.5663	3560	15.2726	3560	18.3951

## Sheet: Supplementary Fig. 7b
moox-0		moox-2		moox-5
2.14409	52.1012	2.14409	95.539	2.14409	-244.441
2.14376	139.487	2.14376	0.73544	2.14376	-57.3384
2.14342	133.64	2.14342	-40.867	2.14342	195.568
2.14309	159.201	2.14309	83.735	2.14309	214.141
2.14276	120.029	2.14276	39.739	2.14276	196.852
2.14243	-51.291	2.14243	-20.961	2.14243	42.323
2.14209	-123.195	2.14209	-22.465	2.14209	104.406
2.14176	63.1524	2.14176	120.13	2.14176	-133.651
2.14143	32.9944	2.14143	2.2353	2.14143	-145.432
2.1411	-19.4499	2.1411	23.239	2.1411	-136.824
2.14077	-95.6886	2.14077	62.039	2.14077	-112.202
2.14044	-36.6118	2.14044	-21.765	2.14044	-20.9354
2.1401	-47.8452	2.1401	-77.867	2.1401	90.7125
2.13977	132.676	2.13977	-71.064	2.13977	-97.455
2.13944	82.2618	2.13944	-0.76017	2.13944	42.8547
2.13911	12.3903	2.13911	60.339	2.13911	-115.81
2.13878	57.2283	2.13878	36.836	2.13878	-10.322
2.13845	67.0448	2.13845	163.73	2.13845	-118.368
2.13812	69.524	2.13812	106.84	2.13812	-45.5558
2.13779	80.8476	2.13779	107.64	2.13779	-144.466
2.13746	51.6598	2.13746	36.84	2.13746	89.6586
2.13712	26.4504	2.13712	81.736	2.13712	-4.69694
2.13679	140.804	2.13679	204.13	2.13679	-149.252
2.13646	77.6609	2.13646	93.738	2.13646	80.2108
2.13613	-1.58317	2.13613	-76.159	2.13613	127.018
2.1358	-71.1018	2.1358	-90.96	2.1358	116.723
2.13547	-0.79105	2.13547	-59.864	2.13547	124.778
2.13514	-53.151	2.13514	-27.265	2.13514	1.03326
2.13481	12.124	2.13481	26.838	2.13481	132.749
2.13448	-13.7001	2.13448	-18.858	2.13448	-9.57155
2.13415	-25.1989	2.13415	46.64	2.13415	22.5837
2.13382	-106.39	2.13382	10.636	2.13382	-104.884
2.1335	34.498	2.1335	-107.96	2.1335	-166.446
2.13317	23.4459	2.13317	-273.86	2.13317	61.6399
2.13284	85.3591	2.13284	29.942	2.13284	77.2444
2.13251	-87.5526	2.13251	48.14	2.13251	-166.541
2.13218	55.0181	2.13218	109.74	2.13218	-160.396
2.13185	-65.8862	2.13185	-124.46	2.13185	70.3385
2.13152	66.1648	2.13152	-53.86	2.13152	170.425
2.13119	86.5974	2.13119	-81.257	2.13119	73.3186
2.13086	-42.8879	2.13086	-22.06	2.13086	102.714
2.13053	-51.735	2.13053	11.036	2.13053	-29.4249
2.13021	92.0801	2.13021	0.73689	2.13021	-49.5887
2.12988	-7.59743	2.12988	-93.859	2.12988	96.4531
2.12955	-29.53	2.12955	3.143	2.12955	-189.359
2.12922	-70.3943	2.12922	3.6402	2.12922	-164.737
2.12889	-30.862	2.12889	-165.26	2.12889	-104.246
2.12857	-161.226	2.12857	-22.562	2.12857	-118.888
2.12824	109.415	2.12824	5.6419	2.12824	29.3792
2.12791	100.925	2.12791	75.043	2.12791	-38.0119
2.12758	104.639	2.12758	113.94	2.12758	-121.966
2.12725	24.1517	2.12725	-4.663	2.12725	2.41565
2.12693	-56.6862	2.12693	-20.962	2.12693	171.062
2.1266	-8.30366	2.1266	19.243	2.1266	200.567
2.12627	-22.9851	2.12627	57.344	2.12627	54.3222
2.12595	150.719	2.12595	-30.06	2.12595	-180.232
2.12562	176.457	2.12562	-223.46	2.12562	-66.2503
2.12529	23.6228	2.12529	-129.86	2.12529	-4.7984
2.12497	-61.5471	2.12497	87.344	2.12497	-194.772
2.12464	-36.6932	2.12464	127.84	2.12464	-132.048
2.12431	81.732	2.12431	-15.559	2.12431	-112.733
2.12399	36.3571	2.12399	108.14	2.12399	58.7723
2.12366	-117.535	2.12366	98.14	2.12366	13.139
2.12333	-19.0926	2.12333	-167.06	2.12333	-73.2464
2.12301	27.341	2.12301	20.445	2.12301	-8.82481
2.12268	49.0958	2.12268	-83.659	2.12268	22.797
2.12235	-163.261	2.12235	78.738	2.12235	-46.7211
2.12203	-152.647	2.12203	151.64	2.12203	-90.1256
2.1217	-45.4483	2.1217	112.65	2.1217	29.0651
2.12138	133.826	2.12138	197.14	2.12138	2.53176
2.12105	79.2556	2.12105	55.541	2.12105	-80.4676
2.12073	66.0755	2.12073	-45.861	2.12073	50.4951
2.1204	-61.9018	2.1204	50.042	2.1204	35.0042
2.12007	-49.4284	2.12007	9.6461	2.12007	180.943
2.11975	-0.87238	2.11975	-29.755	2.11975	145.177
2.11942	-16.7957	2.11942	-103.56	2.11942	35.746
2.1191	-0.52274	2.1191	-176.16	2.1191	118.527
2.11877	111.626	2.11877	-212.96	2.11877	30.0171
2.11845	3.10884	2.11845	-169.15	2.11845	128.09
2.11812	-65.26	2.11812	-67.254	2.11812	75.6567
2.1178	-191.651	2.1178	-11.659	2.1178	-16.2582
2.11748	-62.4333	2.11748	8.5405	2.11748	83.7163
2.11715	124.628	2.11715	-46.956	2.11715	180.826
2.11683	113.493	2.11683	120.05	2.11683	47.8535
2.1165	-64.3756	2.1165	27.346	2.1165	119.918
2.11618	-3.97056	2.11618	61.942	2.11618	59.4144
2.11585	44.9389	2.11585	26.941	2.11585	-70.1729
2.11553	44.3233	2.11553	10.645	2.11553	-35.1443
2.11521	-7.50341	2.11521	18.748	2.11521	-7.65248
2.11488	-29.1745	2.11488	-174.35	2.11488	65.363
2.11456	-10.4268	2.11456	5.4423	2.11456	77.2444
2.11424	-109.221	2.11424	143.94	2.11424	-88.0019
2.11391	67.4968	2.11391	-100.15	2.11391	-38.221
2.11359	16.9965	2.11359	-121.55	2.11359	-44.2673
2.11327	7.35402	2.11327	-45.253	2.11327	82.1317
2.11294	36.1837	2.11294	176.94	2.11294	243.338
2.11262	-50.8453	2.11262	67.743	2.11262	-33.2371
2.1123	22.7445	2.1123	78.148	2.1123	67.2755
2.11197	-59.8613	2.11197	-50.55	2.11197	72.5842
2.11165	-116.464	2.11165	-264.95	2.11165	161.733
2.11133	-2.64283	2.11133	-74.257	2.11133	300.436
2.11101	99.0672	2.11101	32.044	2.11101	158.327
2.11068	-108.151	2.11068	84.149	2.11068	17.0765
2.11036	-23.1567	2.11036	-22.849	2.11036	-49.4656
2.11004	-103.198	2.11004	142.85	2.11004	-15.0834
2.10972	52.37	2.10972	36.944	2.10972	-32.4931
2.10939	164.517	2.10939	-88.255	2.10939	-42.6796
2.10907	-32.6203	2.10907	-59.45	2.10907	147.83
2.10875	22.5703	2.10875	-42.349	2.10875	261.709
2.10843	-42.8817	2.10843	23.048	2.10843	61.3322
2.10811	94.9103	2.10811	51.945	2.10811	96.8819
2.10779	-11.1308	2.10779	-64.253	2.10779	19.5143
2.10746	-27.8434	2.10746	-137.15	2.10746	-103.167
2.10714	80.2364	2.10714	-45.448	2.10714	-20.702
2.10682	-39.2554	2.10682	-6.3517	2.10682	141.993
2.1065	-72.9547	2.1065	-34.955	2.1065	-9.46054
2.10618	-50.3111	2.10618	-35.552	2.10618	88.8201
2.10586	77.4955	2.10586	27.853	2.10586	-40.7608
2.10554	124.902	2.10554	-33.547	2.10554	-145.304
2.10522	23.8952	2.10522	-6.2511	2.10522	-52.121
2.1049	-186.875	2.1049	-79.654	2.1049	61.4362
2.10458	-192.173	2.10458	-8.4507	2.10458	-80.3509
2.10426	-29.9643	2.10426	-88.446	2.10426	-125.765
2.10394	6.56324	2.10394	-55.946	2.10394	-49.4614
2.10361	-105.939	2.10361	21.049	2.10361	-40.2333
2.10329	-139.549	2.10329	29.447	2.10329	-94.045
2.10297	-62.3378	2.10297	19.851	2.10297	-59.6542
2.10265	7.3603	2.10265	23.155	2.10265	214.385
2.10233	37.7846	2.10233	15.655	2.10233	-3.93036
2.10201	5.23391	2.10201	-150.35	2.10201	-95.3154
2.1017	24.8672	2.1017	95.048	2.1017	-51.5904
2.10138	-13.9566	2.10138	138.55	2.10138	137.748
2.10106	-18.9069	2.10106	-46.244	2.10106	193.796
2.10074	-71.5326	2.10074	26.755	2.10074	110.483
2.10042	-28.8172	2.10042	-108.15	2.10042	29.3898
2.1001	-89.3118	2.1001	10.75	2.1001	128.514
2.09978	-60.0356	2.09978	-80.146	2.09978	120.777
2.09946	-5.10849	2.09946	62.358	2.09946	-0.63619
2.09914	-13.6002	2.09914	104.86	2.09914	75.6705
2.09882	-9.18148	2.09882	-42.848	2.09882	-52.0117
2.0985	96.9534	2.0985	83.351	2.0985	-89.6883
2.09818	6.91843	2.09818	76.556	2.09818	-228.925
2.09787	-96.2016	2.09787	-44.741	2.09787	74.1878
2.09755	-60.3876	2.09755	-118.64	2.09755	-50.3062
2.09723	-115.934	2.09723	42.053	2.09723	-61.7747
2.09691	8.68503	2.09691	140.15	2.09691	-6.05542
2.09659	-101.429	2.09659	-122.04	2.09659	-5.73098
2.09627	11.5208	2.09627	149.86	2.09627	-7.00063
2.09596	20.5405	2.09596	-63.242	2.09596	-137.44
2.09564	4.52891	2.09564	-53.046	2.09564	-9.55648
2.09532	41.4993	2.09532	-0.34586	2.09532	150.812
2.095	-58.6169	2.095	-129.54	2.095	-9.86787
2.09469	-65.1592	2.09469	-55.638	2.09469	168.441
2.09437	-10.4144	2.09437	26.259	2.09437	305.339
2.09405	11.0751	2.09405	-71.745	2.09405	-67.7149
2.09373	-7.58637	2.09373	-13.644	2.09373	-121.732
2.09342	-7.58248	2.09342	-187.14	2.09342	45.6407
2.0931	37.0841	2.0931	-33.937	2.0931	170.033
2.09278	-33.0554	2.09278	40.16	2.09278	11.996
2.09247	54.0602	2.09247	-20.144	2.09247	-82.8895
2.09215	68.1239	2.09215	47.058	2.09215	198.89
2.09183	-26.2425	2.09183	26.263	2.09183	-84.1546
2.09152	8.69423	2.09152	43.465	2.09152	-180.2
2.0912	-48.1786	2.0912	-73.039	2.0912	-113.56
2.09088	48.8429	2.09088	65.057	2.09088	81.4026
2.09057	-20.7616	2.09057	5.3598	2.09057	-46.4823
2.09025	-2.715	2.09025	-155.23	2.09025	-135.307
2.08993	201.15	2.08993	-50.034	2.08993	31.3204
2.08962	57.2487	2.08962	-17.638	2.08962	74.4043
2.0893	-24.8309	2.0893	43.659	2.0893	-131.921
2.08899	16.6524	2.08899	-47.638	2.08899	131.083
2.08867	130.837	2.08867	42.467	2.08867	80.7786
2.08835	148.437	2.08835	130.87	2.08835	91.0744
2.08804	1.61766	2.08804	17.064	2.08804	136.177
2.08772	72.1066	2.08772	-44.339	2.08772	-118.655
2.08741	17.8924	2.08741	-44.636	2.08741	190.941
2.08709	60.9687	2.08709	42.37	2.08709	168.759
2.08678	8.16719	2.08678	-28.43	2.08678	-0.09054
2.08646	97.4045	2.08646	-60.035	2.08646	-133.821
2.08615	63.9705	2.08615	-221.14	2.08615	51.7984
2.08583	85.6431	2.08583	37.467	2.08583	64.0088
2.08552	-9.78555	2.08552	-10.628	2.08552	164.631
2.0852	-1.91422	2.0852	142.07	2.0852	67.3052
2.08489	69.723	2.08489	-27.933	2.08489	87.0393
2.08457	68.9252	2.08457	-25.135	2.08457	112.085
2.08426	126.68	2.08426	-43.631	2.08426	-129.045
2.08395	-8.19169	2.08395	-85.726	2.08395	-2.8441
2.08363	-136.17	2.08363	-53.827	2.08363	88.6397
2.08332	-107.08	2.08332	-20.231	2.08332	228.723
2.083	-45.8747	2.083	52.867	2.083	-13.1475
2.08269	-162.703	2.08269	111.97	2.08269	-225.72
2.08238	-7.39374	2.08238	59.477	2.08238	164.631
2.08206	56.2855	2.08206	-12.625	2.08206	202.307
2.08175	201.416	2.08175	27.871	2.08175	116.341
2.08143	175.236	2.08143	191.87	2.08143	99.2486
2.08112	23.6493	2.08112	107.28	2.08112	-11.0154
2.08081	20.4688	2.08081	132.08	2.08081	85.6755
2.08049	-49.9352	2.08049	63.678	2.08049	88.2205
2.08018	-75.5877	2.08018	-109.23	2.08018	6.06879
2.07987	-182.338	2.07987	-113.73	2.07987	-157.477
2.07956	-182.692	2.07956	44.579	2.07956	-122.444
2.07924	-91.1514	2.07924	186.78	2.07924	-119.366
2.07893	-97.0772	2.07893	48.38	2.07893	-63.8623
2.07862	34.9703	2.07862	84.875	2.07862	82.6985
2.0783	-67.7144	2.0783	228.98	2.0783	-98.7848
2.07799	-21.5417	2.07799	128.58	2.07799	83.3438
2.07768	-122.894	2.07768	87.386	2.07768	-15.1417
2.07737	-23.0443	2.07737	-33.818	2.07737	30.067
2.07705	189.838	2.07705	-69.122	2.07705	8.51629
2.07674	159.944	2.07674	-73.621	2.07674	-107.797
2.07643	0.39587	2.07643	-56.514	2.07643	-63.7488
2.07612	93.4421	2.07612	-26.111	2.07612	88.8711
2.07581	90.0812	2.07581	95.985	2.07581	-108.54
2.07549	20.0275	2.07549	23.081	2.07549	118.474
2.07518	3.31262	2.07518	43.983	2.07518	-154.495
2.07487	-51.9605	2.07487	-142.21	2.07487	-342.655
2.07456	-190.289	2.07456	-73.108	2.07456	-228.564
2.07425	-253.704	2.07425	76.188	2.07425	32.6205
2.07394	-60.1904	2.07394	-42.716	2.07394	91.5191
2.07363	-33.3889	2.07363	-42.113	2.07363	115.725
2.07331	47.1889	2.07331	-81.406	2.07331	4.18497
2.073	-98.74	2.073	-91.204	2.073	145.559
2.07269	-144.652	2.07269	-53.009	2.07269	45.1482
2.07238	-5.17447	2.07238	32.088	2.07238	7.89213
2.07207	45.1538	2.07207	159.39	2.07207	33.6871
2.07176	25.7004	2.07176	29.798	2.07176	30.83
2.07145	-41.7823	2.07145	-253.7	2.07145	81.2434
2.07114	55.6805	2.07114	-119.6	2.07114	66.8043
2.07083	81.947	2.07083	10.192	2.07083	42.3899
2.07052	-41.4303	2.07052	-49.103	2.07052	-58.5356
2.07021	-32.0507	2.07021	-145.1	2.07021	143.861
2.0699	217.539	2.0699	-143.2	2.0699	12.3696
2.06959	187.91	2.06959	55.199	2.06959	-33.8038
2.06928	71.514	2.06928	-4.8033	2.06928	111.491
2.06897	58.3392	2.06897	228.5	2.06897	-49.2948
2.06866	-53.6269	2.06866	66.309	2.06866	-3.43812
2.06835	-148.879	2.06835	34.509	2.06835	-74.5455
2.06804	-161.005	2.06804	89.803	2.06804	-115.63
2.06773	70.6331	2.06773	-3.3982	2.06773	54.8189
2.06742	126.008	2.06742	23.408	2.06742	105.663
2.06711	96.8207	2.06711	16.014	2.06711	37.8538
2.0668	18.8131	2.0668	-49.586	2.0668	-234.263
2.06649	40.6555	2.06649	76.908	2.06649	-111.905
2.06618	34.1097	2.06618	121.41	2.06618	87.1963
2.06588	54.8103	2.06588	-16.386	2.06588	93.2543
2.06557	17.138	2.06557	-60.78	2.06557	-134.182
2.06526	93.4687	2.06526	9.1192	2.06526	1.03268
2.06495	31.2839	2.06495	0.51386	2.06495	-120.809
2.06464	90.4527	2.06464	97.914	2.06464	-41.8507
2.06433	18.1993	2.06433	-62.679	2.06433	25.6572
2.06402	62.2494	2.06402	-20.973	2.06402	-50.7498
2.06372	0.6021	2.06372	-29.675	2.06372	17.0659
2.06341	28.1927	2.06341	88.02	2.06341	-83.5529
2.0631	101.959	2.0631	122.72	2.0631	36.3765
2.06279	39.6083	2.06279	-32.272	2.06279	-29.6276
2.06248	-42.1989	2.06248	-7.7659	2.06248	9.86033
2.06218	-52.1949	2.06218	4.3318	2.06218	68.1235
2.06187	0.07259	2.06187	-55.473	2.06187	63.129
2.06156	-122.16	2.06156	-89.972	2.06156	127.336
2.06125	-87.481	2.06125	-38.863	2.06125	195.165
2.06095	-92.0801	2.06095	111.64	2.06095	-1.80423
2.06064	-144.263	2.06064	33.339	2.06064	97.5314
2.06033	-163.278	2.06033	206.73	2.06033	45.8391
2.06002	65.972	2.06002	97.537	2.06002	12.7294
2.05972	75.7956	2.05972	25.846	2.05972	-184.138
2.05941	-42.0981	2.05941	-15.649	2.05941	-52.0998
2.0591	-20.5201	2.0591	-61.353	2.0591	153.37
2.0588	-129.66	2.0588	-49.157	2.0588	211.838
2.05849	-275.772	2.05849	85.247	2.05849	-51.0438
2.05818	-106.479	2.05818	9.0558	2.05818	-185.178
2.05788	17.2556	2.05788	198.86	2.05788	-28.2086
2.05757	17.9605	2.05757	85.856	2.05757	26.8692
2.05726	-33.694	2.05726	14.553	2.05726	182.662
2.05696	14.6005	2.05696	-66.543	2.05696	122.391
2.05665	23.629	2.05665	10.467	2.05665	49.5941
2.05635	-2.19423	2.05635	11.871	2.05635	29.0099
2.05604	-47.6586	2.05604	122.37	2.05604	-28.3062
2.05573	-85.6033	2.05573	56.463	2.05573	-3.79398
2.05543	-45.2679	2.05543	-22.731	2.05543	63.6065
2.05512	144.015	2.05512	-51.621	2.05512	101.296
2.05482	-8.9073	2.05482	26.282	2.05482	194.804
2.05451	58.9265	2.05451	-58.422	2.05451	-20.2265
2.05421	-57.4689	2.05421	-77.124	2.05421	-10.0404
2.0539	-138.478	2.0539	-53.317	2.0539	-133.672
2.05359	-228.241	2.05359	20.693	2.05359	-69.3461
2.05329	-64.6179	2.05329	134.3	2.05329	47.4014
2.05298	-139.266	2.05298	-18.109	2.05298	-15.6459
2.05268	-43.484	2.05268	-123.41	2.05268	-180.253
2.05237	-207.899	2.05237	-90.402	2.05237	-242.223
2.05207	-140.495	2.05207	33.408	2.05207	-172.272
2.05177	-30.7329	2.05177	19.81	2.05177	-11.2711
2.05146	-43.7378	2.05146	63.305	2.05146	118.304
2.05116	-44.9761	2.05116	24.705	2.05116	120.958
2.05085	144.307	2.05085	-96.886	2.05085	243.667
2.05055	86.6451	2.05055	-81.575	2.05055	-64.9544
2.05024	-32.7547	2.05024	-70.373	2.05024	-109.74
2.04994	9.51845	2.04994	31.622	2.04994	52.7408
2.04964	47.816	2.04964	62.923	2.04964	43.4024
2.04933	-47.4313	2.04933	-7.4665	2.04933	25.9045
2.04903	16.0802	2.04903	27.544	2.04903	10.7415
2.04872	-54.1443	2.04872	124.65	2.04872	-37.8655
2.04842	130.704	2.04842	17.041	2.04842	-55.9131
2.04812	-74.4884	2.04812	96.643	2.04812	-79.6844
2.04781	-78.8133	2.04781	125.46	2.04781	-73.62
2.04751	-59.6128	2.04751	-32.234	2.04751	-105.764
2.04721	102.773	2.04721	77.367	2.04721	-76.7891
2.0469	92.425	2.0469	301.06	2.0469	-238.116
2.0466	-13.4445	2.0466	33.766	2.0466	-184.403
2.0463	-83.3939	2.0463	30.08	2.0463	-104.473
2.04599	-44.3817	2.04599	-48.009	2.04599	-143.935
2.04569	-93.734	2.04569	-55.309	2.04569	-50.8623
2.04539	-90.1078	2.04539	-4.0125	2.04539	-102.128
2.04509	-48.0062	2.04509	29.993	2.04509	-34.7283
2.04478	-16.3322	2.04478	37.908	2.04478	199.633
2.04448	-23.8421	2.04448	6.8187	2.04448	-2.00747
2.04418	68.3176	2.04418	124.62	2.04418	6.48302
2.04388	-143.776	2.04388	138.62	2.04388	-101.137
2.04357	-95.9186	2.04357	-6.1763	2.04357	75.368
2.04327	78.3278	2.04327	-37.36	2.04327	133.545
2.04297	168.461	2.04297	-108.25	2.04297	-84.8551
2.04267	70.2872	2.04267	45.351	2.04267	-255.192
2.04236	-20.4582	2.04236	-49.35	2.04236	-69.4682
2.04206	-35.3983	2.04206	-35.841	2.04206	113.412
2.04176	-106.674	2.04176	-141.42	2.04176	79.8924
2.04146	19.1943	2.04146	-253.11	2.04146	-231.801
2.04116	63.3284	2.04116	-100.21	2.04116	-171.413
2.04086	28.9233	2.04086	-226.01	2.04086	35.4383
2.04056	-105.418	2.04056	-134.3	2.04056	-63.2489
2.04025	-64.4516	2.04025	-97.18	2.04025	-112.68
2.03995	-98.1386	2.03995	-25.068	2.03995	-109.591
2.03965	-96.635	2.03965	113.63	2.03965	70.5157
2.03935	-50.9974	2.03935	28.334	2.03935	-24.7869
2.03905	58.7744	2.03905	-121.05	2.03905	-27.7406
2.03875	7.40338	2.03875	-96.93	2.03875	-86.8291
2.03845	30.9389	2.03845	-77.918	2.03845	111.756
2.03815	46.4177	2.03815	60.584	2.03815	83.21
2.03785	130.271	2.03785	89.888	2.03785	-104.637
2.03755	46.9652	2.03755	-31.794	2.03755	3.32127
2.03725	131.182	2.03725	32.229	2.03725	-56.6136
2.03695	105.984	2.03695	-17.258	2.03695	-43.119
2.03665	131.456	2.03665	-87.656	2.03665	-118.793
2.03635	-19.4234	2.03635	210.25	2.03635	38.4014
2.03605	-94.6715	2.03605	-5.5267	2.03605	73.2401
2.03575	90.1078	2.03575	-66.801	2.03575	-132.622
2.03545	-7.79147	2.03545	46.513	2.03545	-59.6924
2.03515	17.8606	2.03515	201.32	2.03515	-104.051
2.03485	-12.5565	2.03485	-60.972	2.03485	-10.7479
2.03455	13.4657	2.03455	-218.55	2.03455	8.91905
2.03425	141.379	2.03425	-119.12	2.03425	79.107
2.03395	188.176	2.03395	-225.2	2.03395	-62.4519
2.03365	-100.146	2.03365	-92.096	2.03365	-161.893
2.03335	-128.97	2.03335	-29.38	2.03335	-184.796
2.03305	-34.1345	2.03305	-27.15	2.03305	118.145
2.03275	-126.98	2.03275	-77.618	2.03275	77.9587
2.03245	-45.4183	2.03245	113.4	2.03245	-86.8408
2.03215	-8.61782	2.03215	21.11	2.03215	-89.9059
2.03185	-174.705	2.03185	-103.97	2.03185	-88.3935
2.03156	70.2297	2.03156	22.668	2.03156	107.044
2.03126	152.329	2.03126	220.3	2.03126	-211.519
2.03096	-23.2142	2.03096	129.02	2.03096	-183.161
2.03066	-40.185	2.03066	178.64	2.03066	93.3328
2.03036	-76.8684	2.03036	94.567	2.03036	116.925
2.03006	43.9793	2.03006	77.811	2.03006	162.2
2.02976	-80.0781	2.02976	-102.65	2.02976	100.266
2.02947	-6.9149	2.02947	-103.22	2.02947	55.0874
2.02917	56.3395	2.02917	-73.2	2.02917	80.0548
2.02887	138.974	2.02887	217.44	2.02887	49.5346
2.02857	145.996	2.02857	-14.511	2.02857	68.0673
2.02828	-3.34738	2.02828	-105.86	2.02828	-269.053
2.02798	64.1607	2.02798	133.77	2.02798	-348.079
2.02768	-148.703	2.02768	139.5	2.02768	-100.755
2.02738	-103.206	2.02738	-22.752	2.02738	-108.02
2.02708	54.6254	2.02708	31.311	2.02708	-14.1176
2.02679	-60.6644	2.02679	-76.531	2.02679	48.572
2.02649	-47.8089	2.02649	-7.7889	2.02649	53.3999
2.02619	89.4887	2.02619	29.253	2.02619	-17.2304
2.0259	-7.31148	2.0259	178.02	2.0259	-0.171
2.0256	-47.4074	2.0256	182.09	2.0256	52.7801
2.0253	-87.1546	2.0253	48.065	2.0253	-76.1863
2.02501	57.6706	2.02501	56.02	2.02501	-156.989
2.02471	108.743	2.02471	147.08	2.02471	-175.063
2.02441	73.5181	2.02441	60.261	2.02441	84.4231
2.02412	-163.526	2.02412	-23.641	2.02412	141.749
2.02382	-93.3272	2.02382	45.948	2.02382	-30.6019
2.02352	56.642	2.02352	91.421	2.02352	88.1462
2.02323	53.6958	2.02323	-16.597	2.02323	230.782
2.02293	0.00191	2.02293	-124.69	2.02293	-10.1057
2.02263	-168.744	2.02263	13.737	2.02263	39.0839
2.02234	-167.869	2.02234	-42.549	2.02234	7.06919
2.02204	-94.9103	2.02204	148.15	2.02204	27.7862
2.02175	-14.5183	2.02175	7.5669	2.02175	-76.0802
2.02145	0.36032	2.02145	-149.49	2.02145	-178.842
2.02116	29.0489	2.02116	-62.924	2.02116	40.7332
2.02086	0.32916	2.02086	-23.572	2.02086	-46.6351
2.02056	-25.1255	2.02056	86.67	2.02056	152.118
2.02027	-84.6171	2.02027	3.0321	2.02027	218.545
2.01997	-44.846	2.01997	0.3316	2.01997	427.868
2.01968	-48.3095	2.01968	-40.95	2.01968	74.4096
2.01938	9.51138	2.01938	16.158	2.01938	213.6
2.01909	-63.5698	2.01909	-20.738	2.01909	63.1459
2.01879	-38.1888	2.01879	70.296	2.01879	-156.045
2.0185	38.8769	2.0185	28.375	2.0185	-196.343
2.0182	-112.493	2.0182	-20.724	2.0182	19.6958
2.01791	-41.6947	2.01791	77.872	2.01791	64.1107
2.01761	60.7706	2.01761	-0.12756	2.01761	-84.4146
2.01732	114.713	2.01732	8.3161	2.01732	40.5071
2.01702	169.673	2.01702	10.418	2.01702	136.952
2.01673	-53.5092	2.01673	26.25	2.01673	87.8246
2.01644	12.6176	2.01644	-55.215	2.01644	-28.6926
2.01614	-88.6661	2.01614	87.041	2.01614	92.2312
2.01585	32.6247	2.01585	158.16	2.01585	20.7147
2.01555	-197.772	2.01555	143.36	2.01555	12.6562
2.01526	-62.3237	2.01526	21.808	2.01526	-59.234
2.01497	-22.7348	2.01497	-72.323	2.01497	35.8479
2.01467	-42.6314	2.01467	-16.605	2.01467	-14.4073
2.01438	54.3831	2.01438	-128.08	2.01438	-20.3846
2.01408	94.079	2.01408	-37.35	2.01408	-67.9293
2.01379	199.293	2.01379	80.865	2.01379	-74.087
2.0135	108.991	2.0135	33.043	2.0135	26.7079
2.0132	156.84	2.0132	142.43	2.0132	24.5821
2.01291	232.133	2.01291	-117.42	2.01291	2.50247
2.01262	-11.0061	2.01262	-130.58	2.01262	48.4722
2.01233	-185.133	2.01233	69.507	2.01233	15.354
2.01203	48.2229	2.01203	-114.45	2.01203	-261.359
2.01174	-25.9551	2.01174	87.507	2.01174	61.3109
2.01145	-31.7155	2.01145	8.9719	2.01145	124.131
2.01115	134.887	2.01115	77.869	2.01115	179.404
2.01086	28.4271	2.01086	275.78	2.01086	-40.2237
2.01057	82.0487	2.01057	286.35	2.01057	-114.76
2.01028	128.856	2.01028	59.78	2.01028	-44.7969
2.00998	120.303	2.00998	9.3155	2.00998	180.338
2.00969	75.6275	2.00969	27.123	2.00969	132.399
2.0094	9.54764	2.0094	120.74	2.0094	219.914
2.00911	-62.0221	2.00911	130.38	2.00911	208.813
2.00881	58.41	2.00881	-25.126	2.00881	93.5334
2.00852	59.2617	2.00852	56.373	2.00852	43.6719
2.00823	-23.5158	2.00823	-42.645	2.00823	-7.51653
2.00794	67.0493	2.00794	-50.01	2.00794	213.154
2.00765	221.245	2.00765	-85.625	2.00765	261.04
2.00736	53.5039	2.00736	-14.245	2.00736	122.582
2.00706	149.224	2.00706	54.459	2.00706	239.835
2.00677	11.1087	2.00677	222.78	2.00677	221.22
2.00648	98.3597	2.00648	249.45	2.00648	359.615
2.00619	277.576	2.00619	250.45	2.00619	469.238
2.0059	233.902	2.0059	258.02	2.0059	253.876
2.00561	267.564	2.00561	128.9	2.00561	410.972
2.00532	198.011	2.00532	408.04	2.00532	716.173
2.00503	232.195	2.00503	394.7	2.00503	687.072
2.00473	404.441	2.00473	348.88	2.00473	685.109
2.00444	544.476	2.00444	453.83	2.00444	636.84
2.00415	502.889	2.00415	493.1	2.00415	426.807
2.00386	326.813	2.00386	245.22	2.00386	332.626
2.00357	161.164	2.00357	98.39	2.00357	249.185
2.00328	-47.3243	2.00328	31.713	2.00328	77.3357
2.00299	-54.7024	2.00299	-278.47	2.00299	92.2503
2.0027	-85.498	2.0027	-86.612	2.0027	-279.709
2.00241	-102.455	2.00241	-197.53	2.00241	-296.594
2.00212	-164.782	2.00212	-254.63	2.00212	-303.525
2.00183	-374.786	2.00183	-412.38	2.00183	-454.528
2.00154	-396.393	2.00154	-423.82	2.00154	-451.854
2.00125	-217.946	2.00125	-323.64	2.00125	-364.635
2.00096	-310.973	2.00096	-300.49	2.00096	-326.173
2.00067	-228.294	2.00067	-222.95	2.00067	-290.598
2.00038	-191.439	2.00038	-255.09	2.00038	-338.474
2.00009	-199.806	2.00009	-191.46	2.00009	-418.454
1.9998	-156.256	1.9998	-131.11	1.9998	-260.287
1.99951	-46.3753	1.99951	-217.13	1.99951	-133.131
1.99922	19.8373	1.99922	-261.69	1.99922	-121.52
1.99893	70.3147	1.99893	-316.87	1.99893	-254.906
1.99865	10.4038	1.99865	-307.26	1.99865	-242.329
1.99836	-149.764	1.99836	-184.05	1.99836	-214.894
1.99807	31.5678	1.99807	-62.597	1.99807	-291.033
1.99778	2.11782	1.99778	41.925	1.99778	-183.32
1.99749	-68.2618	1.99749	96.807	1.99749	-85.2032
1.9972	-39.4403	1.9972	-40.083	1.9972	-227.089
1.99691	40.782	1.99691	-141.26	1.99691	-117.041
1.99662	11.3776	1.99662	141.85	1.99662	18.5974
1.99634	-3.63376	1.99634	22.01	1.99634	62.7681
1.99605	-83.9131	1.99605	37.265	1.99605	113.38
1.99576	-156.291	1.99576	132.35	1.99576	70.4924
1.99547	-187.618	1.99547	25.545	1.99547	115.375
1.99518	-51.7846	1.99518	-11.722	1.99518	-58.8349
1.99489	-84.6861	1.99489	84.872	1.99489	-42.5427
1.99461	52.2542	1.99461	76.445	1.99461	-2.77268
1.99432	-45.3396	1.99432	-69.407	1.99432	-23.7989
1.99403	26.6573	1.99403	-128.26	1.99403	-94.1309
1.99374	-34.084	1.99374	44.169	1.99374	13.1443
1.99346	19.2474	1.99346	40.353	1.99346	-185.74
1.99317	47.2615	1.99317	13.688	1.99317	-55.0609
1.99288	-11.8888	1.99288	31.542	1.99288	59.5767
1.99259	-41.0066	1.99259	82.225	1.99259	49.6163
1.99231	-82.5767	1.99231	-148.19	1.99231	241.395
1.99202	58.1844	1.99202	-179.55	1.99202	9.85778
1.99173	170.398	1.99173	-72.716	1.99173	86.4057
1.99144	-15.7034	1.99144	-82.38	1.99144	-37.233
1.99116	-60.989	1.99116	-1.8503	1.99116	76.6235
1.99087	30.0846	1.99087	25.45	1.99087	-195.982
1.99058	-101.57	1.99058	4.1172	1.99058	-153.519
1.9903	-205.122	1.9903	89.752	1.9903	-77.8855
1.99001	4.88331	1.99001	32.999	1.99001	-186.281
1.98972	-35.8963	1.98972	-3.1146	1.98972	-117.731
1.98944	143.104	1.98944	-54.234	1.98944	-54.6003
1.98915	188.724	1.98915	17.936	1.98915	130.043
1.98887	106.523	1.98887	-62.014	1.98887	155.567
1.98858	97.5991	1.98858	-23.731	1.98858	14.1643
1.98829	151.621	1.98829	192.92	1.98829	-12.1202
1.98801	-99.2264	1.98801	82.177	1.98801	-122.773
1.98772	-61.6479	1.98772	-35.563	1.98772	-9.48781
1.98743	26.0612	1.98743	-69.725	1.98743	68.9609
1.98715	-24.2322	1.98715	-88.325	1.98715	-277.48
1.98686	-89.0464	1.98686	-58.049	1.98686	-71.5409
1.98658	-91.4256	1.98658	-130.08	1.98658	102.769
1.98629	27.7425	1.98629	70.223	1.98629	-17.9319
1.98601	-94.2912	1.98601	-46.89	1.98601	-29.7592
1.98572	117.8	1.98572	-68.635	1.98572	-86.0947
1.98544	151.391	1.98544	-76.499	1.98544	-75.1664
1.98515	49.3205	1.98515	-0.95223	1.98515	-25.6997
1.98487	-7.27752	1.98487	-38.987	1.98487	133.534
1.98458	-160.377	1.98458	-161.13	1.98458	154.569
1.9843	-19.3288	1.9843	-132.7	1.9843	-0.18856
1.98401	-47.6506	1.98401	-59.272	1.98401	158.677
1.98373	28.1335	1.98373	83.367	1.98373	-5.61126
1.98344	19.8223	1.98344	-7.3723	1.98344	-100.677
1.98316	91.2841	1.98316	179.09	1.98316	109.697
1.98287	134.958	1.98287	110.41	1.98287	-43.1445
1.98259	-100.146	1.98259	-3.9496	1.98259	-61.5073
1.9823	-17.0097	1.9823	177.5	1.9823	58.2257
1.98202	58.9919	1.98202	12.397	1.98202	102.127
1.98173	41.57	1.98173	29.256	1.98173	208.707
1.98145	123.31	1.98145	101.63	1.98145	118.856
1.98117	42.8419	1.98117	-4.5851	1.98117	157.658
1.98088	-42.206	1.98088	18.721	1.98088	39.6135
1.9806	44.4516	1.9806	1.3723	1.9806	68.3039
1.98031	99.9163	1.98031	30.662	1.98031	68.7051
1.98003	60.874	1.98003	159.81	1.98003	104.09
1.97975	106.939	1.97975	39.255	1.97975	135.965
1.97946	4.39828	1.97946	99.293	1.97946	29.9545
1.97918	133.048	1.97918	116.92	1.97918	89.6034
1.9789	148.03	1.9789	74.821	1.9789	-60.3876
1.97861	147.341	1.97861	139.8	1.97861	-43.465
1.97833	-18.9308	1.97833	20.068	1.97833	34.2613
1.97805	34.8668	1.97805	-56.944	1.97805	146.61
1.97776	30.5569	1.97776	-74.456	1.97776	42.6637
1.97748	-83.079	1.97748	-43.677	1.97748	67.7595
1.9772	89.2056	1.9772	-101.63	1.9772	41.3487
1.97691	153.337	1.97691	-6.3596	1.97691	-88.5219
1.97663	183.426	1.97663	-76.575	1.97663	-146.196
1.97635	98.625	1.97635	-100.89	1.97635	-17.0892
1.97607	-68.9614	1.97607	-29.919	1.97607	3.86116
1.97578	20.0178	1.97578	-58.457	1.97578	-212.188
1.9755	-86.6354	1.9755	101.72	1.9755	-176.698
1.97522	-49.1117	1.97522	155.8	1.97522	42.6255
1.97494	146.73	1.97494	-8.7052	1.97494	118.676
1.97465	136.4	1.97465	-90.22	1.97465	-22.8416
1.97437	211.33	1.97437	215.35	1.97437	-12.083
1.97409	87.5305	1.97409	24.843	1.97409	64.1871
1.97381	113.13	1.97381	-149.75	1.97381	92.6122
1.97353	118.835	1.97353	-43.935	1.97353	193.318
1.97324	42.091	1.97324	-25.638	1.97324	203.156
1.97296	27.0854	1.97296	24.86	1.97296	103.252
1.97268	-70.8701	1.97268	-20.627	1.97268	88.3797
1.9724	63.2656	1.9724	30.601	1.9724	109.188
1.97212	154.956	1.97212	323.35	1.97212	46.702
1.97184	55.6867	1.97184	175.47	1.97184	5.10077
1.97156	-41.9017	1.97156	20.002	1.97156	-98.4749
1.97127	77.9156	1.97127	30.143	1.97127	147.14
1.97099	49.3452	1.97099	175.12	1.97099	128.939
1.97071	95.0607	1.97071	139.58	1.97071	29.9757
1.97043	54.2778	1.97043	78.041	1.97043	80.1121
1.97015	100.978	1.97015	-112.59	1.97015	-21.6073
1.96987	95.4941	1.96987	-45.908	1.96987	-80.1206
1.96959	106.222	1.96959	-210.99	1.96959	-25.3452
1.96931	-7.22666	1.96931	-70.984	1.96931	76.8549
1.96903	65.8508	1.96903	-21.279	1.96903	98.5025
1.96875	2.28772	1.96875	194.94	1.96875	0.44473
1.96847	-16.7754	1.96847	176.97	1.96847	84.8477
1.96819	20.3459	1.96819	95.728	1.96819	47.1307
1.96791	89.3029	1.96791	77.485	1.96791	95.2676
1.96763	47.9761	1.96763	-64.954	1.96763	-76.7042
1.96735	115.085	1.96735	167.51	1.96735	2.54428
1.96707	181.684	1.96707	75.906	1.96707	-72.4929
1.96679	-77.6246	1.96679	-115.38	1.96679	23.2629
1.96651	34.0982	1.96651	56.637	1.96651	-18.522
1.96623	112.661	1.96623	151.16	1.96623	13.8883
1.96595	1.95499	1.96595	-2.8046	1.96595	-135.498
1.96567	-49.6468	1.96567	-3.6421	1.96567	-247.7
1.96539	-104.949	1.96539	-140.66	1.96539	-16.3187
1.96511	-110.715	1.96511	-132.97	1.96511	-31.2716
1.96483	-12.8148	1.96483	56.433	1.96483	35.8341
1.96455	23.6228	1.96455	1.5454	1.96455	177.027
1.96427	-107.965	1.96427	46.587	1.96427	-11.5906
1.96399	59.68	1.96399	-83.547	1.96399	-114.112
1.96371	106.072	1.96371	39.828	1.96371	64.5246
1.96343	46.8679	1.96343	-16.083	1.96343	-45.7128
1.96315	114.244	1.96315	174.92	1.96315	-220.031
1.96287	15.3656	1.96287	84.462	1.96287	-93.2161
1.9626	-53.6861	1.9626	188.93	1.9626	4.66012
1.96232	-43.9244	1.96232	173.4	1.96232	50.9706
1.96204	136.992	1.96204	158.69	1.96204	140.178
1.96176	139.796	1.96176	61.618	1.96176	54.8338
1.96148	-71.1452	1.96148	-95.131	1.96148	246.638
1.9612	-114.103	1.9612	96.157	1.9612	82.4141
1.96092	-52.8645	1.96092	179.26	1.96092	7.88703
1.96065	-31.0566	1.96065	283.17	1.96065	233.096
1.96037	-83.2515	1.96037	108.33	1.96037	73.2072
1.96009	-50.1589	1.96009	57.919	1.96009	-43.2326
1.95981	-48.084	1.95981	-25.955	1.95981	-2.34179
1.95953	-0.97334	1.95953	119.19	1.95953	62.2449
1.95926	-89.0818	1.95926	102.36	1.95926	88.2237
1.95898	-39.7047	1.95898	64.983	1.95898	38.3866
1.9587	182.515	1.9587	52.24	1.9587	-66.9147
1.95842	63.1108	1.95842	57.839	1.95842	102.295
1.95815	10.4967	1.95815	220.26	1.95815	8.32822
1.95787	-36.2536	1.95787	274.12	1.95787	-122.953
1.95759	81.3659	1.95759	86.033	1.95759	38.4365
1.95731	86.8733	1.95731	-15.106	1.95731	209.333
1.95704	-27.2552	1.95704	35.394	1.95704	239.867
1.95676	86.7522	1.95676	66.844	1.95676	11.3964
1.95648	18.0578	1.95648	126.13	1.95648	118.984
1.9562	11.3227	1.9562	38.375	1.9562	138.342
1.95593	194.084	1.95593	130.18	1.95593	221.358
1.95565	180.003	1.95565	114.74	1.95565	-42.4068
1.95537	50.0926	1.95537	9.5532	1.95537	1.35763
1.9551	13.0085	1.9551	30.223	1.9551	50.7148
1.95482	81.8399	1.95482	-67.244	1.95482	89.5387
1.95454	126.68	1.95454	-78.823	1.95454	6.20942
1.95427	147.588	1.95427	-135.95	1.95427	141.897
1.95399	153.602	1.95399	35.988	1.95399	223.746
1.95372	-57.5503	1.95372	37.003	1.95372	205.82
1.95344	148.552	1.95344	-134.4	1.95344	118.602
1.95316	82.0513	1.95316	-173.81	1.95316	131.359
1.95289	205.59	1.95289	-4.7359	1.95289	103.779
1.95261	178.031	1.95261	-108.38	1.95261	-103.908
1.95234	75.2835	1.95234	-100.24	1.95234	51.8143
1.95206	135.887	1.95206	61.022	1.95206	31.4934
1.95178	165.958	1.95178	129.48	1.95178	-96.6346
1.95151	45.673	1.95151	-28.942	1.95151	11.7392
1.95123	4.35096	1.95123	107.13	1.95123	206.51
1.95096	131.341	1.95096	9.023	1.95096	112.871
1.95068	130.288	1.95068	57.757	1.95068	82.0256
1.95041	-34.123	1.95041	62.023	1.95041	48.6898
1.95013	115.023	1.95013	70.528	1.95013	325.43
1.94986	115.5	1.94986	110.66	1.94986	321.195
1.94958	-69.8132	1.94958	258.76	1.94958	179.829
1.94931	-10.5373	1.94931	215.63	1.94931	171.232
1.94903	107.24	1.94903	124.98	1.94903	208.919
1.94876	25.9674	1.94876	5.8905	1.94876	205.109
1.94848	63.7078	1.94848	81.597	1.94848	324.751
1.94821	261.24	1.94821	265.3	1.94821	219.554
1.94793	226.764	1.94793	282.02	1.94793	184.233
1.94766	264.99	1.94766	315.69	1.94766	151.768
1.94738	179.915	1.94738	181.57	1.94738	401.993
1.94711	148.968	1.94711	86.496	1.94711	260.159
1.94683	157.052	1.94683	140	1.94683	377.944
1.94656	82.6545	1.94656	304.68	1.94656	221.305
1.94629	268.864	1.94629	117.27	1.94629	225.104
1.94601	295.221	1.94601	-17.632	1.94601	382.221
1.94574	44.8965	1.94574	68.996	1.94574	189.625
1.94546	124.301	1.94546	269.28	1.94546	293.58
1.94519	21.792	1.94519	107.86	1.94519	301.232
1.94492	78.0766	1.94492	123.73	1.94492	272.556
1.94464	114.952	1.94464	195.63	1.94464	425.788
1.94437	222.475	1.94437	209.18	1.94437	282.532
1.9441	266.149	1.9441	371.62	1.9441	244.951
1.94382	151.727	1.94382	317.49	1.94382	393.98
1.94355	239.191	1.94355	212	1.94355	435.106
1.94328	92.7965	1.94328	289.69	1.94328	193.817
1.943	188.936	1.943	200.12	1.943	249.843
1.94273	394.102	1.94273	176.81	1.94273	409.974
1.94246	245.231	1.94246	147.64	1.94246	596.818
1.94218	247.646	1.94218	345.93	1.94218	624.879
1.94191	335.835	1.94191	382.64	1.94191	549.961
1.94164	244.292	1.94164	182.83	1.94164	285.005
1.94136	170.671	1.94136	565.27	1.94136	478.026
1.94109	172.942	1.94109	410.13	1.94109	649.3
1.94082	210.181	1.94082	410.68	1.94082	583.987
1.94055	304.145	1.94055	576.4	1.94055	552.721
1.94027	344.73	1.94027	516.87	1.94027	552.413
1.94	459.143	1.94	603.7	1.94	781.253
1.93973	374.54	1.93973	517.39	1.93973	668.913
1.93946	421.55	1.93946	520.04	1.93946	677.181
1.93918	481.24	1.93918	641.38	1.93918	614.425
1.93891	332.914	1.93891	765.02	1.93891	681.617
1.93864	357.198	1.93864	629.83	1.93864	800.293
1.93837	417.128	1.93837	804.44	1.93837	731.318
1.9381	343.888	1.9381	702.71	1.9381	607.113
1.93782	334.174	1.93782	773.72	1.93782	836.091
1.93755	377.849	1.93755	747.23	1.93755	949.046
1.93728	355.484	1.93728	855.77	1.93728	922.365
1.93701	327.032	1.93701	875.34	1.93701	995.309
1.93674	428.9	1.93674	970.03	1.93674	1196.52
1.93647	430.816	1.93647	1034.8	1.93647	1222.63
1.9362	453.573	1.9362	1080.2	1.9362	1253.62
1.93592	467.205	1.93592	1100.9	1.93592	1281.43
1.93565	480.578	1.93565	1148.7	1.93565	1338.1
1.93538	472.284	1.93538	995.19	1.93538	1385.65
1.93511	505.785	1.93511	1253.2	1.93511	1611.39
1.93484	580.561	1.93484	1518.1	1.93484	1658.3
1.93457	640.676	1.93457	1502	1.93457	1560.13
1.9343	735.993	1.9343	1695.2	1.9343	1991.98
1.93403	707.107	1.93403	1689.8	1.93403	2081.13
1.93376	779.193	1.93376	1822.6	1.93376	2236.29
1.93349	841.498	1.93349	1956.6	1.93349	2272.38
1.93322	809.251	1.93322	1988.5	1.93322	2498.01
1.93295	889.743	1.93295	2010.1	1.93295	2578.25
1.93268	944.864	1.93268	2155.3	1.93268	2766.31
1.93241	1064.12	1.93241	2162.9	1.93241	2557.34
1.93213	1062.49	1.93213	2280	1.93213	2830.94
1.93186	1076.96	1.93186	2507.5	1.93186	3120.15
1.93159	1113.08	1.93159	2580.1	1.93159	3268.95
1.93132	1181.7	1.93132	2710.2	1.93132	3272.24
1.93105	1151.9	1.93105	2769.6	1.93105	3521.54
1.93078	1278.04	1.93078	2823.4	1.93078	3567.6
1.93052	1270.65	1.93052	2774.2	1.93052	3863.6
1.93025	1223.89	1.93025	2943.9	1.93025	3668.96
1.92998	1237.18	1.92998	2941.7	1.92998	3721.28
1.92971	1251.4	1.92971	2843	1.92971	3402.78
1.92944	1200.66	1.92944	2612.5	1.92944	3539.05
1.92917	1131.52	1.92917	2637.9	1.92917	3366.69
1.9289	1078.95	1.9289	2558.6	1.9289	3206.54
1.92863	1082.36	1.92863	2311.6	1.92863	2816.4
1.92836	911.139	1.92836	1886.8	1.92836	2510.85
1.92809	728.962	1.92809	1797.4	1.92809	2239.47
1.92782	730.643	1.92782	1452.1	1.92782	1909.94
1.92755	643.07	1.92755	1318	1.92755	1597.59
1.92728	436.252	1.92728	1074.7	1.92728	1304.88
1.92702	237.446	1.92702	943.35	1.92702	1035.17
1.92675	121.986	1.92675	736.35	1.92675	816.351
1.92648	78.3371	1.92648	444.07	1.92648	471.074
1.92621	35.1776	1.92621	283.97	1.92621	168.6
1.92594	-24.4981	1.92594	-52.335	1.92594	-134.734
1.92567	-53.6393	1.92567	-189.08	1.92567	-67.4209
1.9254	9.9209	1.9254	-284.57	1.9254	-388.302
1.92514	-163.389	1.92514	-373.2	1.92514	-442.886
1.92487	-214.858	1.92487	-586.53	1.92487	-346.869
1.9246	-154.58	1.9246	-666.14	1.9246	-669.03
1.92433	-337.69	1.92433	-574.25	1.92433	-904.004
1.92406	-320.175	1.92406	-786.12	1.92406	-929.869
1.9238	-323.471	1.9238	-1006.9	1.9238	-895.535
1.92353	-430.301	1.92353	-864.15	1.92353	-1122.76
1.92326	-462.35	1.92326	-852.27	1.92326	-1034.41
1.92299	-377.503	1.92299	-879.61	1.92299	-1133.91
1.92273	-308.768	1.92273	-919.42	1.92273	-1082.01
1.92246	-311.769	1.92246	-704.03	1.92246	-957.431
1.92219	-430.775	1.92219	-718.38	1.92219	-1115.97
1.92192	-663.638	1.92192	-781.33	1.92192	-985.258
1.92166	-505.18	1.92166	-843.6	1.92166	-1048.4
1.92139	-552.587	1.92139	-847.48	1.92139	-1074.37
1.92112	-630.48	1.92112	-880.14	1.92112	-1158
1.92085	-661.268	1.92085	-842.12	1.92085	-1212.66
1.92059	-698.556	1.92059	-854.49	1.92059	-1250.97
1.92032	-732.218	1.92032	-960.96	1.92032	-947.677
1.92005	-684.98	1.92005	-1027.5	1.92005	-861.096
1.91979	-664.735	1.91979	-1025.4	1.91979	-985.874
1.91952	-643.597	1.91952	-864.73	1.91952	-1028.49
1.91925	-546.776	1.91925	-951.1	1.91925	-1123.19
1.91899	-582.914	1.91899	-798.06	1.91899	-1090.18
1.91872	-615.648	1.91872	-744.23	1.91872	-868.037
1.91845	-497.592	1.91845	-795.8	1.91845	-772.115
1.91819	-413.224	1.91819	-949.46	1.91819	-922.301
1.91792	-477.046	1.91792	-767.08	1.91792	-943.506
1.91766	-411.296	1.91766	-760.4	1.91766	-987.551
1.91739	-508.833	1.91739	-728.08	1.91739	-972.247
1.91712	-703.005	1.91712	-601.15	1.91712	-1066.3
1.91686	-687.377	1.91686	-711.95	1.91686	-880.74
1.91659	-519.278	1.91659	-753.68	1.91659	-862.762
1.91633	-517.032	1.91633	-773.59	1.91633	-947.646
1.91606	-565.747	1.91606	-679.26	1.91606	-685.172
1.91579	-645.463	1.91579	-593.92	1.91579	-525.477
1.91553	-617.753	1.91553	-446.77	1.91553	-808.932
1.91526	-581.163	1.91526	-633.33	1.91526	-873.29
1.915	-382.931	1.915	-622.98	1.915	-876.124
1.91473	-337.497	1.91473	-465.53	1.91473	-739.469
1.91447	-468.812	1.91447	-651.87	1.91447	-620.156
1.9142	-413.737	1.9142	-658.92	1.9142	-521.921
1.91394	-391.864	1.91394	-537.05	1.91394	-673.986
1.91367	-300.244	1.91367	-663.78	1.91367	-795.846
1.91341	-321.418	1.91341	-628.98	1.91341	-720.96
1.91314	-433.991	1.91314	-641.95	1.91314	-675.09
1.91288	-564.093	1.91288	-547.6	1.91288	-621.165
1.91261	-439.068	1.91261	-656.12	1.91261	-684.642
1.91235	-382.144	1.91235	-519.09	1.91235	-604.311
1.91208	-408.899	1.91208	-415.61	1.91208	-465.81
1.91182	-376.493	1.91182	-386.67	1.91182	-414.432
1.91155	-474.021	1.91155	-554.18	1.91155	-506.532
1.91129	-451.954	1.91129	-590.22	1.91129	-330.62
1.91103	-495.867	1.91103	-464.28	1.91103	-413.848
1.91076	-307.408	1.91076	-371.65	1.91076	-602.401
1.9105	-355.876	1.9105	-531.64	1.9105	-526.103
1.91023	-237.077	1.91023	-375.13	1.91023	-420.895
1.90997	-200.938	1.90997	-399.93	1.90997	-394.362
1.90971	-248.707	1.90971	-370.81	1.90971	-478.015
1.90944	-346.572	1.90944	-237.88	1.90944	-605.723
1.90918	-419.459	1.90918	-248.43	1.90918	-463.348
1.90891	-389.273	1.90891	-391.55	1.90891	-529.425
1.90865	-353.541	1.90865	-353.45	1.90865	-442.472
1.90839	-319.348	1.90839	-390.21	1.90839	-372.372
1.90812	-372.92	1.90812	-348.62	1.90812	-379.844
1.90786	-229.373	1.90786	-297.39	1.90786	-486.633
1.9076	-143.077	1.9076	-482.82	1.9076	-594.038
1.90733	-175.05	1.90733	-324.48	1.90733	-577.98
1.90707	-225.075	1.90707	-300.59	1.90707	-582.257
1.90681	-289.091	1.90681	-254.32	1.90681	-412.649
1.90654	-252.732	1.90654	-409.19	1.90654	-263.8
1.90628	-339.585	1.90628	-324.59	1.90628	-521.062
1.90602	-386.991	1.90602	-402.61	1.90602	-539.783
1.90575	-341.345	1.90575	-272.45	1.90575	-349.999
1.90549	-234.945	1.90549	-159.3	1.90549	-411.258
1.90523	-365.923	1.90523	-337.37	1.90523	-255.405
1.90497	-201.133	1.90497	-371.75	1.90497	-324.369
1.9047	-260.011	1.9047	-264.83	1.9047	-348.461
1.90444	-254.315	1.90444	-235.61	1.90444	-327.892
1.90418	-183.143	1.90418	-132.98	1.90418	-371.544
1.90392	-272.402	1.90392	-217.66	1.90392	-236.609
1.90365	-320.074	1.90365	-439.23	1.90365	-248.135
1.90339	-156.158	1.90339	-383.59	1.90339	-356.357
1.90313	10.1668	1.90313	-387.13	1.90313	-583.34
1.90287	-91.116	1.90287	-393.76	1.90287	-499.666
1.90261	-204.839	1.90261	-259.97	1.90261	-223.268
1.90234	-133.428	1.90234	-298.67	1.90234	-289.982
1.90208	-259.657	1.90208	-113.84	1.90208	-299.81
1.90182	-141.477	1.90182	-188.78	1.90182	-353.979
1.90156	-246.496	1.90156	-247.8	1.90156	-345.935
1.9013	-196.887	1.9013	-284.9	1.9013	-187.513
1.90104	-169.797	1.90104	-278.07	1.90104	-213.313
1.90077	-185.301	1.90077	-180.21	1.90077	-206.075
1.90051	-192.085	1.90051	-140.21	1.90051	-142.035
1.90025	-208.12	1.90025	-177.57	1.90025	-122.327
1.89999	-181.224	1.89999	-79.093	1.89999	-321.121
1.89973	-152.063	1.89973	-42.682	1.89973	-234.285
1.89947	-361.935	1.89947	-195.53	1.89947	-407.65
1.89921	-201.345	1.89921	-231.82	1.89921	-379.96
1.89895	-142.591	1.89895	-361.17	1.89895	-109.294
1.89868	-133.587	1.89868	-225.58	1.89868	-49.5919
1.89842	-120.382	1.89842	9.2518	1.89842	-268.968
1.89816	-104.913	1.89816	-84.56	1.89816	-256.838
1.8979	-139.54	1.8979	-388.22	1.8979	-176.719
1.89764	-210.464	1.89764	-149.22	1.89764	-330.376
1.89738	-158.131	1.89738	-269.78	1.89738	-234.783
1.89712	-9.60424	1.89712	-223.28	1.89712	-292.307
1.89686	-44.7213	1.89686	-52.228	1.89686	-157.233
1.8966	1.14828	1.8966	-127.41	1.8966	-361.313
1.89634	-90.55	1.89634	-3.4397	1.89634	-394.256
1.89608	-202.972	1.89608	-139.01	1.89608	-419.717
1.89582	-55.1348	1.89582	-133.63	1.89582	-242.839
1.89556	-104.285	1.89556	-202.58	1.89556	-290.47
1.8953	-153.647	1.8953	-124.56	1.8953	-248.464
1.89504	-217.186	1.89504	-356.29	1.89504	-233.574
1.89478	-204.511	1.89478	-214.85	1.89478	-31.3013
1.89452	-219.379	1.89452	-256.25	1.89452	-343.069
1.89426	-34.4626	1.89426	-128.08	1.89426	-478.694
1.894	-31.5925	1.894	-265.74	1.894	-378.857
1.89374	-158.405	1.89374	-228.74	1.89374	-226.855
1.89348	-40.6131	1.89348	-334.27	1.89348	-392.112
1.89322	36.6516	1.89322	-19.234	1.89322	-231.271
1.89296	16.5198	1.89296	-48.524	1.89296	-217.771
1.8927	-38.8344	1.8927	-86.64	1.8927	-312.036
1.89244	-124.902	1.89244	-127.89	1.89244	-145.994
1.89218	-85.9332	1.89218	-162.87	1.89218	-198.518
1.89193	-158.6	1.89193	-200.58	1.89193	-204.801
1.89167	-181.675	1.89167	-106.11	1.89167	48.6919
1.89141	84.3703	1.89141	-16.067	1.89141	-171.72
1.89115	28.1839	1.89115	-85.651	1.89115	-293.251
1.89089	-124.787	1.89089	-308.57	1.89089	-261.359
1.89063	-184.284	1.89063	-189.4	1.89063	-237.447
1.89037	-94.4946	1.89037	-24.161	1.89037	-113.486
1.89011	-125.282	1.89011	3.8597	1.89011	-243.094
1.88986	-250.016	1.88986	-182.95	1.88986	-115.906
1.8896	-132.517	1.8896	-220.88	1.8896	8.17709
1.88934	21.5815	1.88934	-233.93	1.88934	-66.3384
1.88908	-75.3392	1.88908	-83.903	1.88908	-35.6994
1.88882	70.7728	1.88882	-50.093	1.88882	-181.58
1.88856	117.278	1.88856	-88.008	1.88856	-121.287
1.88831	45.9551	1.88831	-42.647	1.88831	-79.3723
1.88805	-2.03123	1.88805	-111.4	1.88805	-87.8979
1.88779	-177.208	1.88779	-230.78	1.88779	-254.789
1.88753	-311.548	1.88753	-50.665	1.88753	-299.545
1.88727	-280.415	1.88727	-54.278	1.88727	-49.1823
1.88702	-186.327	1.88702	-142.41	1.88702	-288.751
1.88676	-238.713	1.88676	-165.46	1.88676	-217.261
1.8865	-8.26695	1.8865	-188.52	1.8865	-160.545
1.88624	-102.517	1.88624	-59.503	1.88624	-329.898
1.88599	-133.446	1.88599	-59.304	1.88599	-140.571
1.88573	12.7591	1.88573	-363.52	1.88573	-62.5877
1.88547	-8.11686	1.88547	-224.36	1.88547	-165.363
1.88521	-43.9483	1.88521	-49.701	1.88521	-275.591
1.88496	-156.477	1.88496	-96.461	1.88496	-229.074
1.8847	-36.58	1.8847	-16.042	1.8847	-155.843
1.88444	98.2447	1.88444	-19.539	1.88444	-181.856
1.88419	3.64066	1.88419	-153.65	1.88419	-173.397
1.88393	-109.017	1.88393	-139.37	1.88393	-154.347
1.88367	-173.839	1.88367	-83.2	1.88367	-224.032
1.88342	-25.9586	1.88342	-47.252	1.88342	-257.973
1.88316	-67.0121	1.88316	-89.319	1.88316	-197.266
1.8829	-93.6544	1.8829	-150.4	1.8829	-5.49452
1.88265	-250.936	1.88265	-283.48	1.88265	-46.4844
1.88239	-221.528	1.88239	-136.98	1.88239	34.984
1.88213	-222.377	1.88213	-189	1.88213	-136.379
1.88188	-142.485	1.88188	-331.93	1.88188	-327.277
1.88162	18.0675	1.88162	-356.67	1.88162	-172.516
1.88136	-78.0571	1.88136	-178.32	1.88136	27.437
1.88111	-95.0341	1.88111	26.721	1.88111	-194.921
1.88085	-113.793	1.88085	7.2442	1.88085	-76.2945
1.8806	-165.021	1.8806	65.555	1.8806	-291.574
1.88034	-233.548	1.88034	9.4144	1.88034	-140.963
1.88008	-208.483	1.88008	-67.111	1.88008	-260.212
1.87983	-88.269	1.87983	-53.056	1.87983	-225.083
1.87957	3.88406	1.87957	-54.331	1.87957	-82.3599
1.87932	-17.3458	1.87932	-172.5	1.87932	-7.13658
1.87906	-48.3122	1.87906	54.317	1.87906	-184.414
1.87881	-116.606	1.87881	16.532	1.87881	-149.963
1.87855	-154.575	1.87855	-86.966	1.87855	-51.2083
1.8783	-74.9156	1.8783	-95.878	1.8783	-90.1266
1.87804	10.4683	1.87804	-174.22	1.87804	82.4395
1.87779	-61.3967	1.87779	-187.45	1.87779	75.23
1.87753	-22.2616	1.87753	-207.88	1.87753	103.259
1.87728	-74.2522	1.87728	-128.44	1.87728	-82.9299
1.87702	-124.654	1.87702	-112.81	1.87702	-74.3704
1.87677	-157.538	1.87677	-54.277	1.87677	-282.426
1.87651	-43.7918	1.87651	92.046	1.87651	-122.539
1.87626	-99.0849	1.87626	48.638	1.87626	-118.166
1.876	-123.416	1.876	-105.56	1.876	-132.25
1.87575	-28.7145	1.87575	-329.68	1.87575	-97.6439
1.87549	1.25132	1.87549	-171.58	1.87549	-114.505
1.87524	-48.0451	1.87524	14.385	1.87524	-44.4658
1.87498	-67.8055	1.87498	-133.45	1.87498	-199.325
1.87473	-79.6164	1.87473	-84.3	1.87473	-261.03
1.87447	-29.5123	1.87447	-67.945	1.87447	-175.828
1.87422	-115.721	1.87422	-89.318	1.87422	-85.2584
1.87397	-150.887	1.87397	-298.98	1.87397	71.4528
1.87371	49.286	1.87371	21.65	1.87371	-255.819
1.87346	53.9913	1.87346	24.969	1.87346	-338.463
1.8732	-141.813	1.8732	-59.921	1.8732	-241.226
1.87295	-93.2652	1.87295	9.8695	1.87295	38.2178
1.8727	4.21131	1.8727	3.1733	1.8727	-8.78459
1.87244	74.4335	1.87244	-133.24	1.87244	-210.861
1.87219	-64.7851	1.87219	-165.45	1.87219	-179.351
1.87193	-160.422	1.87193	-11.387	1.87193	-99.5776
1.87168	7.16051	1.87168	20.875	1.87168	-114.049
1.87143	-134.286	1.87143	-66.355	1.87143	49.7872
1.87117	-44.9769	1.87117	-80.993	1.87117	15.6798
1.87092	-184.939	1.87092	65.047	1.87092	-142.63
1.87067	-79.4608	1.87067	134.89	1.87067	-226.113
1.87041	-47.4941	1.87041	133.12	1.87041	-51.9226
1.87016	-200.806	1.87016	-82.241	1.87016	-247.381
1.86991	-123.823	1.86991	0.88512	1.86991	-172.644
1.86966	-77.8926	1.86966	-73.499	1.86966	-185.475
1.8694	-64.1598	1.8694	-14.491	1.8694	-29.0343
1.86915	-102.87	1.86915	-39.477	1.86915	-69.6751
1.8689	-138.319	1.8689	-110.27	1.8689	-100.566
1.86864	-126.795	1.86864	-116.17	1.86864	42.704
1.86839	-104.427	1.86839	41.504	1.86839	-220.01
1.86814	-110.07	1.86814	-4.8059	1.86814	-147.862
1.86789	-93.3537	1.86789	-60.42	1.86789	-4.51217
1.86763	11.2829	1.86763	-213.84	1.86763	-39.8915
1.86738	-120.683	1.86738	-92.277	1.86738	37.7424
1.86713	-150.312	1.86713	-234.7	1.86713	-42.3177
1.86688	-62.0539	1.86688	-156.23	1.86688	-379.875
1.86662	-82.2441	1.86662	-239.49	1.86662	-177.77
1.86637	-59.9569	1.86637	-271.12	1.86637	-44.6218
1.86612	-78.7346	1.86612	-58.678	1.86612	-11.9132
1.86587	-15.8653	1.86587	-25.222	1.86587	68.2551
1.86562	-19.511	1.86562	-15.573	1.86562	63.4049
1.86536	-4.68484	1.86536	-87.54	1.86536	-25.0968
1.86511	-109.238	1.86511	36.317	1.86511	159.611
1.86486	122.364	1.86486	-94.657	1.86486	25.5734
1.86461	-0.07834	1.86461	23.879	1.86461	-248.23
1.86436	-59.5367	1.86436	-103.58	1.86436	8.20776
1.86411	-8.95506	1.86411	-96.213	1.86411	-76.8581
1.86386	-63.7184	1.86386	-221.16	1.86386	-61.3247
1.8636	-75.8681	1.8636	-258.83	1.8636	-183.044
1.86335	-68.2053	1.86335	-112.59	1.86335	-151.619
1.8631	-132.04	1.8631	-118.71	1.8631	-34.5011
1.86285	-28.8914	1.86285	-64.519	1.86285	-37.1969
1.8626	-114.74	1.8626	-50.823	1.8626	-198.02
1.86235	-81.9133	1.86235	-42.745	1.86235	-98.3146
1.8621	38.6345	1.8621	-21.491	1.8621	-250.703
1.86185	-45.1114	1.86185	-106.82	1.86185	-60.896
1.8616	67.1289	1.8616	-206.36	1.8616	-46.6457
1.86134	33.8718	1.86134	-211.5	1.86134	-114.547
1.86109	-229.09	1.86109	-20.56	1.86109	-193.827
1.86084	-165.242	1.86084	-65.823	1.86084	-213.462
1.86059	-220.007	1.86059	-77.686	1.86059	39.3396
1.86034	-105.32	1.86034	61.737	1.86034	99.0714
1.86009	-94.8926	1.86009	-112.23	1.86009	71.7925
1.85984	-56.098	1.85984	77.492	1.85984	-67.4772
1.85959	-113.882	1.85959	39.205	1.85959	95.7197
1.85934	69.0667	1.85934	-30.493	1.85934	71.0506
1.85909	91.0541	1.85909	35.213	1.85909	-63.1396
1.85884	-15.3753	1.85884	72.533	1.85884	-62.7384
1.85859	-128.192	1.85859	9.6262	1.85859	98.2043
1.85834	-130.899	1.85834	-19.192	1.85834	-113.709
1.85809	163.844	1.85809	-87.996	1.85809	-139.658
1.85784	186.699	1.85784	-18.71	1.85784	-122.528
1.85759	24.6116	1.85759	-66.426	1.85759	29.0651
1.85734	15.0781	1.85734	-33.763	1.85734	90.4195
1.85709	9.01255	1.85709	-26.774	1.85709	-17.7908
1.85684	33.6153	1.85684	-201.82	1.85684	-136.867
1.85659	-45.8693	1.85659	-219.94	1.85659	-56.8173
1.85634	-41.6912	1.85634	17.525	1.85634	-69.6433
1.85609	-130.828	1.85609	-136.42	1.85609	-272.991
1.85584	24.0455	1.85584	-113.17	1.85584	38.8186
1.8556	-48.2892	1.8556	-37.914	1.8556	-111.777
1.85535	-156.097	1.85535	-88.568	1.85535	-151.693
1.8551	-377.554	1.8551	-1.2178	1.8551	-137.058
1.85485	-197.922	1.85485	28.522	1.85485	-11.4133
1.8546	-263.195	1.8546	30.456	1.8546	114.643
1.85435	-197.4	1.85435	-90.61	1.85435	-74.6113
1.8541	-71.1036	1.8541	-21.78	1.8541	-133.226
1.85385	-41.3021	1.85385	51.552	1.85385	-120.523
1.8536	-65.0159	1.8536	17.776	1.8536	15.0802
1.85336	-89.4444	1.85336	120.59	1.85336	-111.056
1.85311	-100.96	1.85311	-209.59	1.85311	-209.163
1.85286	-155.274	1.85286	-120.47	1.85286	-211.01
1.85261	-33.7718	1.85261	58.84	1.85261	-119.366
1.85236	42.0892	1.85236	117.74	1.85236	-57.4499
1.85211	-67.6896	1.85211	43.557	1.85211	-103.881
1.85187	26.1249	1.85187	-51.939	1.85187	-11.079
1.85162	132.765	1.85162	14.162	1.85162	-158.666
1.85137	136.356	1.85137	73.755	1.85137	-26.6124
1.85112	-137.762	1.85112	-149.34	1.85112	-64.671
1.85087	-157.972	1.85087	-58.365	1.85087	-272.152
1.85063	-9.32387	1.85063	-116.36	1.85063	-280.6
1.85038	-25.1095	1.85038	-143.28	1.85038	-280.791

## Sheet: Supplementary Fig. 8a
	moox-0	moox-2	moox-5	moox-10	moox-15
1201.08	224740	237537	220200	235102	219274
1200.08	223581	235673	218577	235252	219822
1199.08	222648	234955	219071	236653	218002
1198.08	223853	235460	218788	236713	217736
1197.08	225893	236560	218526	235085	218853
1196.08	226000	238804	219680	235254	216039
1195.08	224604	238107	219336	235306	213462
1194.08	224895	237099	219345	236977	215101
1193.08	225303	235635	218901	232761	215628
1192.08	223822	235118	216699	232468	214507
1191.08	222229	232297	217109	235750	216614
1190.08	223394	233706	218774	236000	216968
1189.08	224799	233934	218243	233104	216549
1188.08	221729	234571	218419	233253	216100
1187.08	219498	234887	218058	232657	213238
1186.08	219172	235390	218338	232341	213180
1185.08	221792	235361	218055	231498	214758
1184.08	225291	234198	217258	230920	215519
1183.08	224091	233867	217168	232559	216494
1182.08	221508	235451	216529	231890	216398
1181.08	220511	235474	215417	232343	214408
1180.08	221046	233673	215722	234878	212771
1179.08	221362	234935	217472	234229	211969
1178.08	222009	233170	217173	230573	212116
1177.08	222649	233627	217885	230704	212627
1176.08	222605	234245	216558	232613	213322
1175.08	221857	233212	215768	232497	214959
1174.08	221936	233120	217579	232793	214019
1173.08	221541	234282	217066	234699	213874
1172.08	219883	233600	217417	232569	214596
1171.08	220351	234568	216832	232004	213901
1170.08	222282	233669	215557	231855	215106
1169.08	222562	232616	215344	230682	213985
1168.08	220853	230426	214817	230619	210068
1167.08	221396	232083	214216	229413	210077
1166.08	222016	231575	213911	229510	210377
1165.08	222303	233211	215932	230544	209525
1164.08	221192	232489	217557	230052	211380
1163.08	220258	231029	219194	229324	212234
1162.08	221398	231662	217402	228275	210456
1161.08	221117	230619	215937	227741	210936
1160.08	219370	231203	215393	228531	208717
1159.08	218853	231454	213358	227927	208439
1158.08	217256	231279	214380	229284	209818
1157.08	219026	229210	214699	229714	210702
1156.08	220367	229781	214949	230059	209492
1155.08	219287	231149	215656	228118	210108
1154.08	218592	231145	212838	227564	209697
1153.08	219245	231073	211641	229421	209281
1152.08	220257	230562	213457	228020	208539
1151.08	220741	229437	214508	225320	207856
1150.08	220157	230690	213713	226123	208310
1149.08	218646	230997	212571	226124	208713
1148.08	218171	231277	213182	226380	210833
1147.08	218155	231651	211924	226664	210806
1146.08	217280	230397	210731	225544	209929
1145.08	217474	228784	211479	226794	210411
1144.08	219271	227100	211502	226364	209908
1143.08	220721	227166	212396	227276	208626
1142.08	221144	228040	214817	227092	207256
1141.08	220216	231036	214393	227545	207739
1140.08	217822	230368	211318	227497	209119
1139.08	217794	229245	211491	226170	208684
1138.08	218955	233130	212471	225148	208815
1137.08	218827	231141	212840	225234	209352
1136.08	217482	230886	212063	226386	207632
1135.08	217357	228969	211289	227775	208504
1134.08	217562	230299	212272	226695	209026
1133.08	218579	229278	212291	226109	205814
1132.08	219464	228633	212746	228863	204746
1131.08	217888	227265	211486	228377	207172
1130.08	216877	225951	211609	225801	207064
1129.08	217443	225425	212451	225041	208609
1128.08	216990	225143	211621	225247	208053
1127.08	217337	228395	210894	223376	205321
1126.08	218256	230490	211488	225318	206082
1125.08	218384	229796	212283	224635	207525
1124.08	218019	228871	210467	225352	207725
1123.08	217124	230298	210343	226019	206401
1122.08	217276	228537	211353	224583	204799
1121.08	218230	226460	211728	225000	205497
1120.08	217736	226083	213180	224177	206515
1119.08	215694	227272	212119	223930	206025
1118.08	215325	227363	210169	224914	206116
1117.08	216971	230377	209682	223378	204358
1116.08	218114	229799	210152	222736	204000
1115.08	217249	228119	209870	223425	204732
1114.08	215898	226874	208941	223675	204917
1113.08	216003	225177	212251	224656	204570
1112.08	215124	225929	213897	224095	204190
1111.08	214577	227491	212054	224282	205650
1110.08	215789	226620	211381	224536	206072
1109.08	217186	227069	212757	224162	204335
1108.08	217506	226121	213180	222290	204725
1107.08	216217	227777	211165	221954	203721
1106.08	214178	229355	210651	223445	204360
1105.08	216563	229332	210987	222564	204663
1104.08	218094	226837	211263	225008	204224
1103.08	217865	227660	210582	224751	204338
1102.08	218134	225007	209056	224140	206702
1101.08	216961	224336	209885	224025	209482
1100.08	216370	226364	212125	223688	207002
1099.08	217036	228012	211940	222108	204607
1098.08	216714	226864	211086	222138	206710
1097.08	216497	226053	211465	223053	206752
1096.08	217353	229225	210623	222085	204401
1095.08	217544	228934	210357	223144	204386
1094.08	217647	225619	210212	222002	205289
1093.08	217084	225460	211240	223349	205342
1092.08	215586	224942	211228	222856	202848
1091.08	216034	226507	211018	223487	202017
1090.08	215919	228638	212452	222911	203931
1089.08	216054	224604	211516	224403	204386
1088.08	217512	222937	209295	223854	202300
1087.08	219050	223770	208923	222358	204066
1086.08	218488	225937	211382	223477	205785
1085.08	218452	224310	212158	224673	204791
1084.08	217347	224556	211639	221533	201778
1083.08	216850	223547	213122	221551	202669
1082.08	217143	225869	213206	223147	205072
1081.08	217000	226548	211457	222958	204855
1080.08	217370	225784	209314	222737	205103
1079.08	216542	224534	209337	222278	205912
1078.08	214306	226051	210585	222047	205991
1077.08	214413	227970	211601	220083	204780
1076.08	215812	230141	211668	219203	204623
1075.08	217327	228309	208763	221449	203507
1074.08	218090	226892	208163	225034	203688
1073.08	218082	229950	210163	224537	204619
1072.08	216336	231195	212054	224342	204327
1071.08	216930	230097	213132	224088	203659
1070.08	218485	226892	211637	224294	203448
1069.08	219247	224650	209488	223605	204737
1068.08	218463	225980	209869	224562	204361
1067.08	216908	225705	209410	226678	205487
1066.08	218384	225478	209731	224586	205492
1065.08	220193	228124	211058	222252	203659
1064.08	219356	228945	211224	224021	203674
1063.08	219175	226958	210248	224887	205808
1062.08	219131	227234	211410	223422	206692
1061.08	218392	226424	212492	222232	205961
1060.08	217926	226339	213013	223157	205409
1059.08	218132	227283	212397	223344	204307
1058.08	219344	227888	211974	226445	202716
1057.08	218783	226612	213088	223214	206877
1056.08	217767	227287	213056	223922	208318
1055.08	217261	226495	214035	226207	204793
1054.08	218287	229188	214325	225729	204886
1053.08	219593	230739	213269	222433	205182
1052.08	220174	227237	212896	222302	202820
1051.08	220390	226225	211024	223769	201793
1050.08	219925	228265	210297	222983	203989
1049.08	220953	229632	212180	224691	202541
1048.08	222896	230452	213685	225453	203928
1047.08	223583	228866	213702	225494	205714
1046.08	221625	230115	212620	224325	203529
1045.08	222240	228253	210759	226205	204534
1044.08	221185	227323	210997	226813	206551
1043.08	220017	225787	211713	225710	207816
1042.08	218900	229293	210867	224915	207129
1041.08	219008	229430	210694	225487	206213
1040.08	220883	230704	211265	228344	205748
1039.08	219635	229013	212965	225749	205905
1038.08	220321	230222	214257	225758	207259
1037.08	223279	232020	213709	227035	206931
1036.08	222626	228878	213121	226171	205002
1035.08	221087	230106	212969	226864	205330
1034.08	220451	233824	213628	226891	206082
1033.08	220090	232782	213632	225296	205420
1032.08	219268	232096	212208	224922	204953
1031.08	219841	231092	213593	225918	206241
1030.08	223858	232794	215503	227685	208333
1029.08	225780	232289	215338	228291	206932
1028.08	224434	230415	216088	229798	206151
1027.08	225568	232072	216173	227255	205343
1026.08	224175	232862	214954	226816	204472
1025.08	223853	230192	216224	227053	207018
1024.08	225137	231499	215498	226992	208092
1023.08	225465	232353	214013	228762	206186
1022.08	224686	231084	215385	230341	207255
1021.08	223365	233019	216360	231453	209251
1020.08	223793	234200	215719	230056	209859
1019.08	225292	233106	216291	226241	209238
1018.08	225503	235237	217596	226793	209093
1017.08	226861	232695	215545	227808	208872
1016.08	227724	231841	214770	227934	207231
1015.08	228587	232486	214702	227256	206722
1014.08	226890	234205	213019	227505	207733
1013.08	226972	236884	215703	228833	208028
1012.08	229770	237907	217545	229336	209150
1011.08	232410	237245	218829	231486	210215
1010.08	230506	240527	218839	231984	209393
1009.08	228581	243732	220202	232984	211696
1008.08	230012	244334	221652	236309	214857
1007.08	229901	238758	221807	236267	214823
1006.08	229266	239360	221186	235420	213471
1005.08	229744	236380	220699	232489	213458
1004.08	228963	237218	219975	229847	212455
1003.08	230598	238318	216652	228477	211839
1002.08	233859	234672	215237	228370	210694
1001.08	234652	236381	216671	228440	207675
1000.08	233728	237796	215633	230481	208385
999.08	236323	237505	215012	231728	210657
998.08	239333	239025	215836	232090	211740
997.08	240171	243645	217450	233090	213257
996.08	239278	247582	223182	238131	216852
995.08	236413	252656	228651	242955	221018
994.08	234685	253738	230600	247255	223123
993.08	232325	252558	229071	247375	222565
992.08	229351	247929	226013	242986	221696
991.08	227519	241567	221802	237619	218517
990.08	225089	237726	217253	232583	214420
989.08	220396	236696	214792	229460	209311
988.08	219210	234570	213651	224880	207220
987.08	218008	234374	211407	224872	205618
986.08	218307	230836	208868	224265	203842
985.08	221946	225824	206731	219692	200329
984.08	226318	226969	205656	218685	195129
983.08	231590	221437	204073	216126	193444
982.08	239431	219499	201926	215440	195767
981.08	248586	223266	203073	216218	197548
980.08	253766	229565	206264	220002	200792
979.08	256934	241639	211465	227218	205067
978.08	259340	253316	220703	237390	212485
977.08	261075	270024	231749	253422	223321
976.08	263085	284172	245774	271924	237213
975.08	260146	296396	259160	283899	250381
974.08	253056	300016	263508	286007	256315
973.08	242089	290498	257252	277917	254108
972.08	228324	277429	245447	263184	247122
971.08	215467	257998	231102	246739	232157
970.08	205711	240418	217545	233344	214910
969.08	198708	226750	208401	223481	203673
968.08	191001	216630	201693	213084	196500
967.08	183337	207970	194151	206198	191798
966.08	177018	193144	186920	198251	184142
965.08	172410	184352	177810	189248	175649
964.08	169981	182322	169471	181810	168962
963.08	167503	178016	165513	179497	165164
962.08	166008	175412	163569	179330	164085
961.08	165877	172685	162526	175426	162590
960.08	164756	172331	162107	171455	160397
959.08	164808	172565	161473	170742	159062
958.08	165363	173546	160212	172350	158692
957.08	165289	171763	161503	170642	158221
956.08	165574	170409	162060	170431	156488
955.08	165085	169717	160671	171818	157908
954.08	164411	170914	161165	171812	160667
953.08	163095	170997	159925	171659	158671
952.08	163531	170746	157248	172143	155505
951.08	165113	174875	158247	173234	156517
950.08	165140	172907	161871	172525	158285
949.08	164483	169928	163702	173422	158092
948.08	162997	168648	164572	175124	157328
947.08	162335	171690	162913	172763	156129
946.08	162865	172877	160959	171156	157236
945.08	162413	170664	160498	171395	158717
944.08	162722	171385	160881	170851	159073
943.08	164542	171261	161524	170945	157538
942.08	164273	170013	160577	169370	157124
941.08	162985	170722	159180	169385	158241
940.08	164192	170095	160871	170436	159257
939.08	164886	170289	161366	173284	158029
938.08	163345	169148	159676	173891	158053
937.08	163913	169954	158291	172842	156817
936.08	164982	171457	159124	171076	157180
935.08	165677	172713	161130	169600	157554
934.08	166737	170920	161787	170486	156527
933.08	164893	169310	160343	172751	156223
932.08	165589	170021	161033	172530	155569
931.08	167715	174318	162634	171451	157977
930.08	166564	175515	161825	171586	159022
929.08	164209	173860	162582	172682	158234
928.08	163860	171664	163805	173807	157515
927.08	164138	171746	163706	171369	158008
926.08	165128	170525	163435	170139	159165
925.08	165473	173223	161890	169902	158825
924.08	164280	173929	160710	169960	158601
923.08	166258	174248	160596	171758	158957
922.08	166676	175336	159882	170103	158683
921.08	166503	174755	159329	168041	157034
920.08	167463	172810	161192	169064	158197
919.08	167070	171645	161314	172687	159143
918.08	164796	173116	160475	173689	157564
917.08	165645	173680	161287	172987	157970
916.08	167815	171920	161444	171782	158790
915.08	167189	171952	161210	171002	157519
914.08	167858	172672	161490	172250	157881
913.08	168748	173006	162566	173664	159134
912.08	166654	171980	162945	173031	159588
911.08	166042	171586	163380	171052	158002
910.08	167236	173005	162809	171574	157185
909.08	167977	174018	162008	172367	156982
908.08	167244	173383	162696	172602	156137
907.08	166287	173728	161887	172555	156317
906.08	165690	174384	161425	170934	158407
905.08	164505	173784	161264	171392	158274
904.08	165511	172000	159820	172846	157519
903.08	167444	172078	160413	173754	159130
902.08	166784	174736	160937	173174	160782
901.08	166023	174364	160279	171736	158451
900.08	166689	173402	162249	173040	157450
899.08	167783	173694	163656	174624	159453
898.08	168340	171944	162465	174210	159455
897.08	167320	173703	163126	174901	159080
896.08	166482	174062	162888	175660	157497
895.08	166750	173430	163587	173857	157148
894.08	165767	175199	165068	174376	158608
893.08	166000	175534	164031	174198	158376
892.08	166771	174849	163772	174330	157799
891.08	167706	176727	163546	174024	157574
890.08	168382	175672	162633	173324	157523
889.08	167926	173872	161956	173756	158074
888.08	167923	174078	161972	175053	157206
887.08	168113	174761	162099	175032	158271
886.08	165889	173512	161667	172439	159556
885.08	164284	173883	161316	172748	158882
884.08	166397	174351	162375	174537	158176
883.08	167806	175052	163094	174410	158800
882.08	167543	174748	162682	174346	160296
881.08	167942	176265	162607	175171	161051
880.08	169051	175557	162819	177058	161053
879.08	169821	173930	163954	174645	161517
878.08	170051	173699	164055	173530	160270
877.08	170768	173717	162713	173366	158857
876.08	170636	175554	163849	174234	158519
875.08	168831	175502	164666	176652	159629
874.08	167282	175667	164270	175955	159376
873.08	167896	174769	162642	171987	158911
872.08	168535	173013	162025	170522	160739
871.08	168200	174628	161106	174869	161966
870.08	168493	173831	162144	175587	161022
869.08	167497	172494	164473	175214	162108
868.08	167212	173070	164737	174706	160857
867.08	169233	173586	163802	174511	159232
866.08	169642	175113	163608	173834	160046
865.08	169027	175558	165064	174832	158347
864.08	170851	174653	166064	174060	160386
863.08	171485	172449	165928	174566	159777
862.08	169377	174356	164805	175901	158522
861.08	168596	173018	164114	177364	161167
860.08	169490	174611	163841	176632	163048
859.08	169200	174689	163966	174253	161532
858.08	169868	175200	164632	174427	159492
857.08	170925	177581	164250	174682	159575
856.08	171698	176792	163679	173163	159627
855.08	170469	174874	164638	173333	161388
854.08	170800	174185	165377	174814	160399
853.08	171773	174646	164206	176292	160478
852.08	170003	174342	163790	175520	160398
851.08	168402	175418	165422	176384	160902
850.08	167563	175321	166073	175738	160924
849.08	167999	175426	165981	173726	161265
848.08	169274	179007	166203	174126	160611
847.08	169969	176631	166208	175824	159971
846.08	171508	176293	165619	175783	160592
845.08	173100	176648	163977	174911	161510
844.08	172362	178840	163785	175262	160075
843.08	170689	176764	165422	176418	160841
842.08	170498	176380	166526	176162	162910
841.08	170804	177958	166069	176536	163078
840.08	170584	177617	164610	176789	162068
839.08	170467	177322	164265	177711	161785
838.08	171586	179717	166135	175359	161984
837.08	171910	179464	166565	175820	160169
836.08	171318	178011	165146	177442	161274
835.08	171901	178718	164059	177233	162618
834.08	172644	178289	163667	177061	162737
833.08	172419	177898	164821	178806	163760
832.08	170904	177715	165692	177363	163620
831.08	170492	177676	164868	175484	161684
830.08	170105	179003	166151	175543	159833
829.08	170858	180273	166627	174956	161396
828.08	172762	178763	166454	175483	161505
827.08	172780	177705	166622	175472	161473
826.08	172505	177572	167406	175252	162609
825.08	171993	180253	167149	177155	161765
824.08	171492	179416	166247	176591	161444
823.08	170797	177850	166246	176208	162844
822.08	172350	179080	165923	176869	162591
821.08	173259	179248	165650	176518	163094
820.08	172125	178773	164778	177815	163319
819.08	171597	179209	165029	176431	162747
818.08	172643	175633	165827	175334	162455
817.08	173781	176885	165109	175365	163586
816.08	173821	177793	164336	176269	162763
815.08	172858	178962	166001	176813	162430
814.08	171530	179409	164795	178214	162201
813.08	170141	178274	164652	178049	161964
812.08	171549	178048	166443	177860	161612
811.08	173678	179187	166994	178453	162233
810.08	174464	180223	166858	179373	163461
809.08	173637	180184	167510	180245	164182
808.08	172438	178773	168004	178750	164394
807.08	172985	178388	167676	178221	164532
806.08	174598	179764	167958	179146	162914
805.08	174900	180310	167904	178632	161134
804.08	174594	180552	167550	177938	162543
803.08	173895	180574	168261	179427	163874
802.08	172977	180392	169142	179132	164458
801.08	173863	181123	169190	179010	164729
800.08	174351	179717	168557	180040	163669
799.08	175513	180352	167729	181589	164652
798.08	176813	180904	168516	181440	164653
797.08	176335	179433	167949	177932	162373
796.08	175981	180043	169450	177336	163645
795.08	176022	180550	169728	177723	164814
794.08	175659	180121	169263	180136	164394
793.08	176053	181043	169386	181719	163831
792.08	177098	182676	168967	181130	163614
791.08	177030	183464	169021	179754	163547
790.08	176289	184117	168531	178758	164767
789.08	176227	182527	168046	178201	165576
788.08	175712	181676	168032	177253	166054
787.08	176180	182154	167626	177990	167582
786.08	176006	181262	168873	179451	166435
785.08	176432	180393	167585	180369	165308
784.08	176159	180965	165501	180025	164185
783.08	174281	179476	166646	178969	164187
[truncated: 783 more rows]

## Sheet: Supplementary Fig. 8b
moox-0	Mo 6+	Mo 6+	Mo 4+	Mo 4+	fitting
[truncated: 324 more rows]

[truncated: 59 more sheets: Supplementary Fig. 8c, Supplementary Fig. 8d, Supplementary Fig. 8e, Supplementary Fig. 8f, Supplementary Fig. 9b, Supplementary Fig. 9c, Supplementary Fig. 10, Supplementary Fig. 12, Supplementary Fig. 13a, Supplementary Fig. 13b, Supplementary Fig. 14a, Supplementary Fig. 14b, Supplementary Fig. 14c, Supplementary Fig. 14d, Supplementary Fig. 15b, Supplementary Fig. 15c, Supplementary Fig. 15d, Supplementary Fig. 16, Supplementary Fig. 17, Supplementary Fig. 18 …]
