# Supplementary material
Source: Research Square preprint supplement (doi:10.21203/rs.3.rs-9927563/v1)
Supplement: Supplementary file 3 [file ce1f0cb65d238c44f554b32c.xlsx]

## Sheet: Fig. 2a
degree	Raw data	Calculated line	Difference	Bragg position
10.264	460
10.297	472
10.33	430
10.363	468
10.396	455
10.429	484
10.462	448
10.495	440
10.528	441
10.561	422
10.594	499
10.627	460
10.66	404
10.693	439
10.726	436
10.759	426
10.792	433
10.825	430
10.858	439
10.891	399
10.924	408
10.957	439
10.99	450
11.023	439
11.056	408
11.089	405
11.122	411
11.155	404
11.188	430
11.221	418
11.254	403
11.287	423
11.32	425
11.353	421
11.386	400
11.419	423
11.452	401
11.485	395
11.518	419
11.551	398
11.584	380
11.617	404
11.65	415
11.683	397
11.716	394
11.749	408
11.782	414
11.815	391
11.848	377
11.881	375
11.914	383
11.947	384
11.98	362
12.013	393
12.046	438
12.079	408
12.112	384
12.145	377
12.178	391
12.211	405
12.244	397
12.277	433
12.31	441
12.343	437
12.376	436
12.409	458
12.442	467
12.475	529
12.508	515
12.541	557
12.574	603
12.607	679
12.64	711
12.673	739
12.706	740
12.739	859
12.772	810
12.805	796
12.838	804
12.871	649
12.904	615
12.937	542
12.97	484
13.003	398
13.036	435
13.069	374
13.102	378
13.135	333
13.168	378
13.201	355
13.234	354
13.267	333
13.3	343
13.333	321
13.366	315
13.399	335
13.432	350
13.465	344
13.498	312
13.531	336
13.564	283
13.597	294
13.63	299
13.663	277
13.696	296
13.729	313
13.762	324
13.795	313
13.828	314
13.861	318
13.894	318
13.927	306
13.96	299
13.993	303
14.026	303
14.059	307
14.092	297
14.125	291
14.158	293
14.191	287
14.224	283
14.257	286
14.29	280
14.323	286
14.356	301
14.389	293
14.422	290
14.455	288
14.488	296
14.521	302
14.554	290
14.587	296
14.62	291
14.653	269
14.686	280
14.719	261
14.752	283
14.785	300
14.818	299
14.851	266
14.884	262
14.917	300
14.95	272
14.983	272
15.016	283
15.049	294
15.082	282
15.115	291
15.148	238
15.181	262
15.214	281
15.247	289
15.28	265
15.313	269
15.346	256
15.379	279
15.412	243
15.445	249
15.478	251
15.511	261
15.544	236
15.577	253
15.61	258
15.643	263
15.676	243
15.709	239
15.742	256
15.775	248
15.808	266
15.841	248
15.874	250
15.907	231
15.94	236
15.973	254
16.006	237
16.039	244
16.072	247
16.105	250
16.138	244
16.171	237
16.204	237
16.237	238
16.27	237
16.303	225
16.336	228
16.369	242
16.402	235
16.435	231
16.468	235
16.501	221
16.534	216
16.567	237
16.6	222
16.633	220
16.666	246
16.699	247
16.732	255
16.765	247
16.798	223
16.831	209
16.864	217
16.897	229
16.93	221
16.963	224
16.996	220
17.029	220
17.062	219
17.095	204
17.128	209
17.161	221
17.194	224
17.227	209
17.26	206
17.293	214
17.326	222
17.359	209
17.392	213
17.425	199
17.458	201
17.491	187
17.524	208
17.557	224
17.59	235
17.623	212
17.656	190
17.689	195
17.722	211
17.755	199
17.788	195
17.821	192
17.854	213
17.887	216
17.92	213
17.953	223
17.986	213
18.019	204
18.052	204
18.085	190
18.118	232
18.151	218
18.184	190
18.217	211
18.25	212
18.283	187
18.316	185
18.349	184
18.382	197
18.415	194
18.448	176
18.481	180
18.514	196
18.547	204
18.58	192
18.613	178
18.646	229
18.679	202
18.712	193
18.745	203
18.778	192
18.811	179
18.844	169
18.877	196
18.91	203
18.943	203
18.976	188
19.009	175
19.042	200
19.075	191
19.108	189
19.141	179
19.174	177
19.207	191
19.24	203
19.273	202
19.306	191
19.339	190
19.372	184
19.405	183
19.438	183
19.471	175
19.504	172
19.537	175
19.57	186
19.603	180
19.636	162
19.669	166
19.702	172
19.735	170
19.768	174
19.801	185
19.834	196
19.867	184
19.9	183
19.933	167
19.966	176
19.999	195
20.032	211
20.065	168
20.098	153
20.131	165
20.164	160
20.197	168
20.23	176
20.263	162
20.296	181
20.329	177
20.362	164
20.395	173
20.428	185
20.461	174
20.494	185
20.527	161
20.56	166
20.593	183
20.626	160
20.659	176
20.692	185
20.725	164
20.758	180
20.791	179
20.824	153
20.857	177
20.89	172
20.923	176
20.956	180
20.989	166
21.022	170
21.055	159
21.088	166
21.121	188
21.154	195
21.187	165
21.22	157
21.253	192
21.286	170
21.319	151
21.352	174
21.385	193
21.418	186
21.451	168
21.484	176
21.517	185
21.55	177
21.583	161
21.616	165
21.649	173
21.682	188
21.715	173
21.748	159
21.781	157
21.814	170
21.847	167
21.88	173
21.913	191
21.946	201
21.979	185
22.012	183
22.045	188
22.078	189
22.111	192
22.144	182
22.177	186
22.21	185
22.243	180
22.276	201
22.309	213
22.342	199
22.375	185
22.408	196
22.441	199
22.474	193
22.507	195
22.54	198
22.573	200
22.606	187
22.639	216
22.672	197
22.705	215
22.738	212
22.771	211
22.804	219
22.837	217
22.87	229
22.903	243
22.936	251
22.969	260
23.002	270
23.035	280
23.068	324
23.101	378
23.134	409
23.167	451
23.2	494
23.233	559
23.266	591
23.299	716
23.332	764
23.365	880
23.398	951
23.431	1010
23.464	1085
23.497	1209
23.53	1084
23.563	1045
23.596	1036
23.629	1041
23.662	1031
23.695	1015
23.728	968
23.761	932
23.794	840
23.827	735
23.86	616
23.893	549
23.926	415
23.959	353
23.992	320
24.025	316
24.058	305
24.091	276
24.124	275
24.157	263
24.19	273
24.223	257
24.256	258
24.289	263
24.322	246
24.355	249
24.388	250
24.421	244
24.454	232
24.487	227
24.52	220
24.553	239
24.586	256
24.619	257
24.652	258
24.685	242
24.718	213
24.751	211
24.784	235
24.817	242
24.85	247
24.883	239
24.916	240
24.949	265
24.982	256
25.015	277
25.048	277
25.081	293
25.114	311
25.147	316
25.18	347
25.213	370
25.246	388
25.279	452
25.312	486
25.345	469
25.378	548
25.411	616
25.444	585
25.477	647
25.51	661
25.543	714
25.576	782
25.609	868
25.642	881
25.675	945
25.708	940
25.741	975
25.774	884
25.807	774
25.84	725
25.873	550
25.906	469
25.939	471
25.972	389
26.005	355
26.038	325
26.071	317
26.104	294
26.137	327
26.17	304
26.203	284
26.236	280
26.269	294
26.302	274
26.335	303
26.368	283
26.401	292
26.434	276
26.467	291
26.5	306
26.533	279
26.566	286
26.599	277
26.632	278
26.665	290
26.698	320
26.731	306
26.764	293
26.797	311
26.83	337
26.863	368
26.896	400
26.929	457
26.962	497
26.995	605
27.028	739
27.061	885
27.094	1022
27.127	1115
27.16	1217
27.193	1325
27.226	1461
27.259	1660
27.292	1908
27.325	2060
27.358	2026
27.391	1813
27.424	1497
27.457	1181
27.49	852
27.523	635
27.556	512
27.589	426
27.622	356
27.655	286
27.688	276
27.721	275
27.754	245
27.787	242
27.82	258
27.853	231
27.886	216
27.919	207
27.952	204
27.985	188
28.018	207
28.051	203
28.084	189
28.117	218
28.15	187
28.183	195
28.216	175
28.249	178
28.282	192
28.315	198
28.348	174
28.381	186
28.414	179
28.447	180
28.48	166
28.513	197
28.546	217
28.579	172
28.612	169
28.645	204
28.678	176
28.711	180
28.744	171
28.777	180
28.81	183
28.843	173
28.876	178
28.909	218
28.942	192
28.975	186
29.008	184
29.041	191
29.074	201
29.107	223
29.14	212
29.173	229
29.206	211
29.239	213
29.272	231
29.305	227
29.338	223
29.371	226
29.404	220
29.437	199
29.47	217
29.503	225
29.536	231
29.569	243
29.602	243
29.635	251
29.668	242
29.701	249
29.734	265
29.767	263
29.8	266
29.833	255
29.866	243
29.899	247
29.932	252
29.965	234
29.998	199
30.031	184
30.064	177
30.097	171
30.13	170
30.163	161
30.196	150
30.229	140
30.262	147
30.295	148
30.328	177
30.361	165
30.394	151
30.427	144
30.46	134
30.493	153
30.526	154
30.559	155
30.592	144
30.625	142
30.658	145
30.691	137
30.724	134
30.757	116
30.79	126
30.823	130
30.856	130
30.889	122
30.922	130
30.955	126
30.988	128
31.021	125
31.054	116
31.087	106
31.12	105
31.153	117
31.186	121
31.219	111
31.252	119
31.285	101
31.318	115
31.351	111
31.384	138
31.417	118
31.45	116
31.483	116
31.516	125
31.549	134
31.582	123
31.615	103
31.648	126
31.681	98
31.714	119
31.747	111
31.78	120
31.813	119
31.846	108
31.879	108
31.912	109
31.945	121
31.978	113
32.011	116
32.044	118
32.077	111
32.11	115
32.143	120
32.176	118
32.209	119
32.242	124
32.275	111
32.308	102
32.341	115
32.374	115
32.407	109
32.44	105
32.473	104
32.506	108
32.539	108
32.572	111
32.605	112
32.638	110
32.671	118
32.704	116
32.737	121
32.77	132
32.803	117
32.836	115
32.869	119
32.902	115
32.935	108
32.968	134
33.001	124
33.034	137
33.067	144
33.1	161
33.133	174
33.166	195
33.199	182
33.232	199
33.265	212
33.298	210
33.331	221
33.364	189
33.397	205
33.43	232
33.463	267
33.496	266
33.529	297
33.562	397
33.595	398
33.628	488
33.661	528
33.694	601
33.727	700
33.76	645
33.793	683
33.826	682
33.859	705
33.892	753
33.925	671
33.958	645
33.991	480
34.024	389
34.057	333
34.09	288
34.123	207
34.156	182
34.189	181
34.222	181
34.255	174
34.288	169
34.321	172
34.354	164
34.387	145
34.42	144
34.453	149
34.486	157
34.519	137
34.552	136
34.585	145
34.618	142
34.651	139
34.684	133
34.717	122
34.75	132
34.783	127
34.816	133
34.849	140
34.882	127
34.915	126
34.948	138
34.981	143
35.014	134
35.047	144
35.08	149
35.113	149
35.146	157
35.179	154
35.212	158
35.245	174
35.278	182
35.311	177
35.344	188
35.377	225
35.41	251
35.443	234
35.476	235
35.509	245
35.542	223
35.575	189
35.608	179
35.641	167
35.674	155
35.707	153
35.74	134
35.773	131
35.806	141
35.839	131
35.872	115
35.905	119
35.938	99
35.971	108
36.004	96
36.037	94
36.07	98
36.103	115
36.136	96
36.169	93
36.202	87
36.235	98
36.268	106
36.301	111
36.334	116
36.367	98
36.4	104
36.433	94
36.466	101
36.499	97
36.532	87
36.565	123
36.598	99
36.631	102
36.664	91
36.697	107
36.73	122
36.763	117
36.796	96
36.829	119
36.862	108
36.895	111
36.928	92
36.961	99
36.994	105
37.027	112
37.06	101
37.093	94
37.126	125
37.159	114
37.192	102
37.225	109
37.258	127
37.291	117
37.324	135
37.357	138
37.39	137
37.423	131
37.456	126
37.489	137
37.522	142
37.555	133
37.588	121
37.621	132
37.654	144
37.687	130
37.72	114
37.753	123
37.786	134
37.819	140
37.852	147
37.885	132
37.918	132
37.951	157
37.984	170
38.017	161
38.05	149
38.083	168
38.116	178
38.149	180
38.182	195
38.215	205
38.248	241
38.281	274
38.314	269
38.347	311
38.38	328
38.413	327
38.446	361
38.479	397
38.512	410
38.545	445
38.578	447
38.611	464
38.644	468
38.677	480
38.71	513
38.743	488
38.776	519
38.809	562
38.842	558
38.875	610
38.908	672
38.941	728
38.974	694
39.007	664
39.04	584
39.073	558
39.106	486
39.139	501
39.172	414
39.205	368
39.238	349
39.271	309
39.304	297
39.337	311
39.37	304
39.403	294
39.436	240
39.469	265
39.502	292
39.535	328
39.568	344
39.601	338
39.634	334
39.667	325
39.7	293
39.733	289
39.766	260
39.799	243
39.832	222
39.865	216
39.898	207
39.931	201
39.964	180
39.997	175
40.03	192
40.063	179
40.096	148
40.129	147
40.162	150
40.195	141
40.228	141
40.261	147
40.294	140
40.327	141
40.36	138
40.393	137
40.426	150
40.459	139
40.492	124
40.525	124
40.558	120
40.591	109
40.624	106
40.657	113
40.69	110
40.723	102
40.756	94
40.789	96
40.822	111
40.855	92
40.888	80
40.921	96
40.954	84
40.987	90
41.02	87
41.053	101
41.086	91
41.119	99
41.152	92
41.185	91
41.218	91
41.251	79
41.284	86
41.317	97
41.35	101
41.383	74
41.416	83
41.449	80
41.482	71
41.515	87
41.548	90
41.581	74
41.614	79
41.647	94
41.68	97
41.713	59
41.746	78
41.779	87
41.812	104
41.845	73
41.878	84
41.911	89
41.944	71
41.977	73
42.01	68
42.043	82
42.076	84
42.109	76
42.142	88
42.175	83
42.208	81
42.241	73
42.274	79
42.307	87
42.34	80
42.373	84
42.406	90
42.439	84
42.472	76
42.505	74
42.538	78
42.571	69
42.604	69
42.637	77
42.67	77
42.703	75
42.736	77
42.769	85
42.802	84
42.835	91
42.868	90
42.901	74
42.934	82
42.967	93
43	81
43.033	74
43.066	79
43.099	85
43.132	87
43.165	78
43.198	75
43.231	68
43.264	67
43.297	71
43.33	84
43.363	86
43.396	88
43.429	90
43.462	89
43.495	76
43.528	66
43.561	68
43.594	70
43.627	80
43.66	82
43.693	73
43.726	85
43.759	91
43.792	83
43.825	75
43.858	87
43.891	73
43.924	57
43.957	77
43.99	69
44.023	84
44.056	73
44.089	93
44.122	81
44.155	68
44.188	69
44.221	79
44.254	75
44.287	85
44.32	85
44.353	83
44.386	81
44.419	81
44.452	92
44.485	76
44.518	82
44.551	80
44.584	86
44.617	98
44.65	83
44.683	86
44.716	74
44.749	75
44.782	81
44.815	96
44.848	89
44.881	86
44.914	84
44.947	82
44.98	79
45.013	84
45.046	83
45.079	75
45.112	73
45.145	75
45.178	70
45.211	83
45.244	75
45.277	76
45.31	97
45.343	104
45.376	104
45.409	99
45.442	111
45.475	119
45.508	109
45.541	112
45.574	125
45.607	135
45.64	137
45.673	140
45.706	150
45.739	176
45.772	203
45.805	233
45.838	278
45.871	313
45.904	332
45.937	366
45.97	408
46.003	419
46.036	371
46.069	352
46.102	328
46.135	334
46.168	326
46.201	342
46.234	328
46.267	328
46.3	315
46.333	332
46.366	315
46.399	306
46.432	274
46.465	285
46.498	270
46.531	252
46.564	241
46.597	246
46.63	252
46.663	263
46.696	251
46.729	239
46.762	292
46.795	283
46.828	243
46.861	256
46.894	220
46.927	158
46.96	180
46.993	179
47.026	162
47.059	144
47.092	162
47.125	161
47.158	150
47.191	144
47.224	157
47.257	162
47.29	148
47.323	152
47.356	167
47.389	166
47.422	167
47.455	152
47.488	150
47.521	150
47.554	144
47.587	118
47.62	154
47.653	163
47.686	145
47.719	138
47.752	146
47.785	150
47.818	136
47.851	130
47.884	148
47.917	143
47.95	132
47.983	147
48.016	146
48.049	137
48.082	134
48.115	134
48.148	146
48.181	150
48.214	145
48.247	134
48.28	130
48.313	145
48.346	152
48.379	155
48.412	160
48.445	170
48.478	154
48.511	148
48.544	171
48.577	148
48.61	155
48.643	159
48.676	141
48.709	148
48.742	167
48.775	173
48.808	192
48.841	204
48.874	242
48.907	284
48.94	260
48.973	271
49.006	254
49.039	272
49.072	318
49.105	297
49.138	319
49.171	377
49.204	413
49.237	487
49.27	439
49.303	425
49.336	384
49.369	356
49.402	303
49.435	279
49.468	187
49.501	181
49.534	162
49.567	139
49.6	127
49.633	120
49.666	112
49.699	108
49.732	107
49.765	111
49.798	108
49.831	119
49.864	113
49.897	111
49.93	105
49.963	106
49.996	93
50.029	87
50.062	98
50.095	103
50.128	95
50.161	84
50.194	89
50.227	105
50.26	99
50.293	100
50.326	102
50.359	92
50.392	94
50.425	101
50.458	115
50.491	116
50.524	109
50.557	109
50.59	116
50.623	111
50.656	106
50.689	111
50.722	109
50.755	111
50.788	124
50.821	130
50.854	122
50.887	113
50.92	123
50.953	135
50.986	127
51.019	131
51.052	137
51.085	124
51.118	136
51.151	129
51.184	137
51.217	133
51.25	122
51.283	117
51.316	117
51.349	120
51.382	127
51.415	115
51.448	119
51.481	119
51.514	115
51.547	115
51.58	101
51.613	125
51.646	107
51.679	120
51.712	102
51.745	103
51.778	108
51.811	121
51.844	127
51.877	118
51.91	118
51.943	107
51.976	97
52.009	118
52.042	123
52.075	117
52.108	119
52.141	116
52.174	118
52.207	126
52.24	134
52.273	132
52.306	160
52.339	153
52.372	163
52.405	182
52.438	170
52.471	189
52.504	215
52.537	199
52.57	205
52.603	206
52.636	206
52.669	214
52.702	225
52.735	205
52.768	194
52.801	181
52.834	175
52.867	159
52.9	171
52.933	159
52.966	167
52.999	188
53.032	163
53.065	154
53.098	159
53.131	143
53.164	145
53.197	159
53.23	144
53.263	129
53.296	145
53.329	162
53.362	165
53.395	156
53.428	144
53.461	148
53.494	158
53.527	151
53.56	156
53.593	171
53.626	163
53.659	170
53.692	179
53.725	185
53.758	181
53.791	186
53.824	205
53.857	215
53.89	212
53.923	205
53.956	210
53.989	200
54.022	184
54.055	196
54.088	205
54.121	213
54.154	202
54.187	188
54.22	188
54.253	200
54.286	193
54.319	212
54.352	206
54.385	204
54.418	215
54.451	206
54.484	189
54.517	217
54.55	169
54.583	200
54.616	212
54.649	226
54.682	227
54.715	241
54.748	254
54.781	272
54.814	276
54.847	312
54.88	315
54.913	329
54.946	339
54.979	366
55.012	353
55.045	357
55.078	353
55.111	384
55.144	393
55.177	396
55.21	384
55.243	370
55.276	352
55.309	328
55.342	326
55.375	291
55.408	270
55.441	260
55.474	219
55.507	209
55.54	193
55.573	176
55.606	162
55.639	160
55.672	168
55.705	169
55.738	166
55.771	167
55.804	181
55.837	185
55.87	183
55.903	175
55.936	174
55.969	178
56.002	174
56.035	160
56.068	161
56.101	171
56.134	177
56.167	180
56.2	187
56.233	213
56.266	213
56.299	234
56.332	262
56.365	253
56.398	237
56.431	232
56.464	240
56.497	224
56.53	215
56.563	188
56.596	173
56.629	180
56.662	178
56.695	145
56.728	150
56.761	148
56.794	175
56.827	151
56.86	166
56.893	182
56.926	187
56.959	197
56.992	200
57.025	238
57.058	208
57.091	223
57.124	255
57.157	274
57.19	293
57.223	276
57.256	279
57.289	270
57.322	270
57.355	274
57.388	278
57.421	286
57.454	299
57.487	284
57.52	269
57.553	321
57.586	276
57.619	279
57.652	264
57.685	274
57.718	241
57.751	235
57.784	239
57.817	257
57.85	256
57.883	270
57.916	248
57.949	255
57.982	250
58.015	247
58.048	254
58.081	260
58.114	271
58.147	235
58.18	220
58.213	246
58.246	236
58.279	242
58.312	242
58.345	230
58.378	241
58.411	262
58.444	248
58.477	239
58.51	255
58.543	254
58.576	255
58.609	263
58.642	291
58.675	310
58.708	310
58.741	310
58.774	299
58.807	316
58.84	327
58.873	306
58.906	276
58.939	266
58.972	237
59.005	245
59.038	232
59.071	184
59.104	191
59.137	171
59.17	138
59.203	132
59.236	126
59.269	126
59.302	113
59.335	107
59.368	98
59.401	124
59.434	116
59.467	101
59.5	98
59.533	111
59.566	101
59.599	98
59.632	114
59.665	110
59.698	101
59.731	115
59.764	116
59.797	113
59.83	126
59.863	95
59.896	107
59.929	105
59.962	91
59.995	111
60.028	107
60.061	111
60.094	107
60.127	98
60.16	100
60.193	90
60.226	116
60.259	109
60.292	99
60.325	101
60.358	117
60.391	123
60.424	110
60.457	99
60.49	101
60.523	99
60.556	108
60.589	98
60.622	93
60.655	83
60.688	83
60.721	96
60.754	98
60.787	81
60.82	93
60.853	102
60.886	97
60.919	104
60.952	103
60.985	102
61.018	99
61.051	100
61.084	102
61.117	100
61.15	100
61.183	94
61.216	97
61.249	101
61.282	99
61.315	110
61.348	105
61.381	86
61.414	85
61.447	94
61.48	107
61.513	117
61.546	115
61.579	101
61.612	95
61.645	109
61.678	106
61.711	108
61.744	112
61.777	117
61.81	116
61.843	112
61.876	123
61.909	130
61.942	130
61.975	134
62.008	144
62.041	155
62.074	133
62.107	124
62.14	140
62.173	122
62.206	138
62.239	125
62.272	139
62.305	118
62.338	124
62.371	117
62.404	125
62.437	117
62.47	109
62.503	123
62.536	123
62.569	107
62.602	130
62.635	121
62.668	114
62.701	105
62.734	117
62.767	105
62.8	99
62.833	114
62.866	119
62.899	120
62.932	127
62.965	107
62.998	119
63.031	111
63.064	116
63.097	107
63.13	118
63.163	116
63.196	115
63.229	123
63.262	124
63.295	123
63.328	128
63.361	114
63.394	112
63.427	115
63.46	120
63.493	109
63.526	91
63.559	117
63.592	118
63.625	121
63.658	135
63.691	133
63.724	134
63.757	137
63.79	132
63.823	144
63.856	167
63.889	165
63.922	150
63.955	134
63.988	133
64.021	149
64.054	157
64.087	168
64.12	170
64.153	166
64.186	170
64.219	183
64.252	206
64.285	204
64.318	213
64.351	241
64.384	254
64.417	259
64.45	297
64.483	304
64.516	306
64.549	309
64.582	303
64.615	305
64.648	288
64.681	263
64.714	277
64.747	247
64.78	231
64.813	242
64.846	207
64.879	201
64.912	195
64.945	191
64.978	190
65.011	199
65.044	180
65.077	172
65.11	159
65.143	165
65.176	154
65.209	162
65.242	151
65.275	146
65.308	131
65.341	135
65.374	134
65.407	138
65.44	142
65.473	127
65.506	142
65.539	114
65.572	113
65.605	117
65.638	110
65.671	120
65.704	112
65.737	113
65.77	109
65.803	97
65.836	106
65.869	111
65.902	99
65.935	112
65.968	107
66.001	110
66.034	115
66.067	105
66.1	116
66.133	106
66.166	99
66.199	107
66.232	113
66.265	108
66.298	99
66.331	99
66.364	97
66.397	97
66.43	94
66.463	96
66.496	95
66.529	85
66.562	93
66.595	101
66.628	102
66.661	105
66.694	96
66.727	95
66.76	105
66.793	91
66.826	97
66.859	91
66.892	93
66.925	90
66.958	86
66.991	88
67.024	75
67.057	87
67.09	97
67.123	103
67.156	101
67.189	112
67.222	116
67.255	124
67.288	117
67.321	120
67.354	135
67.387	126
67.42	141
67.453	130
67.486	119
67.519	121
67.552	133
67.585	150
67.618	113
67.651	134
67.684	106
67.717	118
67.75	111
67.783	96
67.816	96
67.849	101
67.882	83
67.915	90
67.948	90
67.981	75
68.014	74
68.047	66
68.08	71
68.113	69
68.146	66
68.179	71
68.212	65
68.245	73
68.278	86
68.311	84
68.344	77
68.377	76
68.41	64
68.443	68
68.476	65
68.509	77
68.542	82
68.575	59
68.608	54
68.641	59
68.674	67
68.707	73
68.74	67
68.773	66
68.806	75
68.839	70
68.872	64
68.905	72
68.938	80
68.971	80
69.004	75
69.037	73
69.07	69
69.103	70
69.136	75
69.169	75
69.202	77
69.235	74
69.268	76
69.301	90
69.334	107
69.367	103
69.4	97
69.433	111
69.466	113
69.499	136
69.532	140
69.565	164
69.598	164
69.631	166
69.664	168
69.697	168
69.73	159
69.763	150
69.796	171
69.829	187
69.862	159
69.895	149
69.928	150
69.961	119
69.994	123
70.027	134
70.06	113
70.093	109
70.126	107
70.159	106
70.192	116
70.225	112
70.258	89
70.291	101
70.324	81
70.357	78
70.39	94
70.423	72
70.456	71
70.489	83
70.522	68
70.555	83
70.588	91
70.621	78
70.654	78
70.687	99
70.72	100
70.753	87
70.786	98
70.819	92
70.852	84
70.885	85
70.918	69
70.951	85
70.984	86
71.017	83
71.05	70
71.083	87
71.116	81
71.149	78
71.182	81
71.215	89
71.248	82
71.281	73
71.314	79
71.347	83
71.38	82
71.413	93
71.446	96
71.479	82
71.512	85
71.545	96
71.578	90
71.611	81
71.644	79
71.677	80
71.71	91
71.743	93
71.776	93
71.809	91
71.842	79
71.875	81
71.908	69
71.941	69
71.974	69
72.007	76
72.04	80
72.073	77
72.106	66
72.139	72
72.172	82
72.205	87
72.238	83
72.271	76
72.304	74
72.337	67
72.37	76
72.403	68
72.436	65
72.469	72
72.502	76
72.535	70
72.568	71
72.601	62
72.634	73
72.667	68
72.7	74
72.733	75
72.766	74
72.799	74
72.832	90
72.865	63
72.898	73
72.931	67
72.964	68
72.997	85
73.03	100
73.063	80
73.096	86
73.129	76
73.162	90
73.195	77
73.228	80
73.261	79
73.294	88
73.327	92
73.36	95
73.393	93
73.426	91
73.459	91
73.492	76
73.525	95
73.558	95
73.591	79
73.624	87
73.657	85
73.69	67
73.723	68
73.756	74
73.789	81
73.822	78
73.855	85
73.888	73
73.921	61
73.954	70
73.987	78
74.02	85
74.053	86
74.086	90
74.119	88
74.152	93
74.185	93
74.218	88
74.251	92
74.284	84
74.317	83
74.35	88
74.383	85
74.416	91
74.449	86
74.482	87
74.515	90
74.548	80
74.581	84
74.614	85
74.647	80
74.68	78
74.713	92
74.746	93
74.779	91
74.812	100
74.845	95
74.878	116
74.911	89
74.944	90
74.977	109
75.01	88
75.043	90
75.076	87
75.109	107
75.142	94
75.175	84
75.208	80
75.241	80
75.274	94
75.307	92
75.34	102
75.373	86
75.406	93
75.439	105
75.472	87
75.505	100
75.538	72
75.571	109
75.604	86
75.637	103
75.67	119
75.703	96
75.736	104
75.769	88
75.802	102
75.835	91
75.868	85
75.901	108
75.934	95
75.967	75
76	74
76.033	81
76.066	86
76.099	77
76.132	79
76.165	84
76.198	91
[truncated: 4,552 more rows]

## Sheet: Fig. 2g
	moox-0	moox-2	moox-5
1	0	0	0
2	0	0	0
3	0	0	0
4	0	0	0
5	0	0	0
6	0	0	0
7	0	0	0
8	0	0	0
9	0	0	0
10	0	0	0
11	0	0	0
12	0	0	0
13	0	0	0
14	0	0	0
15	0	0	0
16	0	0	0
17	0	0	0
18	0	0	0
19	0	0	0
20	0	0	0
21	0	0	0
22	0	0	0
23	0	0	0
24	0	0	0
25	0	0	0
26	0	0	0
27	0	0	0
28	0	0	0
29	0	0	0
30	0	0	0
31	0	0	0
32	0	0	0
33	0	0	0
34	0	0	0
35	0	0	0
36	0	0	0
37	0	0	0
38	0	0	0
39	0	0	0
40	0	0	0
41	0	0	0
42	0	0	0
43	0	0	0
44	0	0	0
45	0	0	0
46	0	0	0
47	0	0	0
48	0	0	0
49	0	0	0
50	0	0	0
51	0	0	0
52	0	0	0
53	0	0	0
54	0	0	0
55	0	0	0
56	0	0	0
57	0	0	0
58	0	0	0
59	0	0	0
60	0	0	0
61	0	0	0
62	0	0	0
63	0	0	0
64	0	0	0
65	0	0	0
66	0	0	0
67	0	0	0
68	0	0	0
69	0	0	0
70	0	0	0
71	0	0	0
72	0	0	0
73	0	0	0
74	0	0	0
75	0	0	0
76	0	0	0
77	0	0	0
78	0	0	0
79	0	0	0
80	0	0	0
81	0	0	0
82	0	0	0
83	0	0	0
84	0	0	0
85	0	0	0
86	0	0	0
87	0	0	0
88	0	0	0
89	0	0	0
90	0	0	0
91	0	0	0
92	0	0	0
93	0	0	0
94	0	0	0
95	0	0	0
96	0	0	0
97	0	0	0
98	0	0	0
99	0	0	0
100	0	0	0
101	0	0	0
102	0	0	0
103	0	0	0
104	0	0	0
105	0	0	0
106	0	0	0
107	0	0	0
108	0	0	0
109	0	0	0
110	0	0	0
111	0	0	0
112	0	0	0
113	0	0	0
114	0	0	0
115	0	0	0
116	0	0	0
117	0	0	0
118	0	0	0
119	0	0	0
120	0	0	0
121	0	0	0
122	0	0	0
123	0	0	0
124	0	0	0
125	0	0	0
126	0	0	0
127	0	0	0
128	0	0	0
129	0	0	0
130	0	0	0
131	0	0	0
132	0	0	0
133	0	0	0
134	0	0	0
135	0	0	0
136	0	0	0
137	0	0	0
138	0	0	0
139	0	0	0
140	0	0	0
141	0	0	0
142	0	0	0
143	0	0	0
144	0	0	0
145	0	0	0
146	0	0	0
147	0	0	0
148	0	0	0
149	0	0	0
150	0	0	0
151	0	0	0
152	0	0	0
153	0	0	0
154	0	0	0
155	0	0	0
156	0	0	0
157	0	0	0
158	0	0	0
159	0	0	0
160	0	0	0
161	0	0	0
162	0	0	0
163	0	0	0
164	0	0	0
165	0	0	0
166	0	0	0
167	0	0	0
168	0	0	0
169	0	0	0
170	0	0	0
171	0	0	0
172	0	0	0
173	0	0	0
174	0	0	0
175	0	0	0
176	0	0	0
177	0	0	0
178	0	0	0
179	0	0	0
180	0	0	0
181	0	0	0
182	0	0	0
183	0	0	0
184	0	0	0
185	0	0	0
186	0	0	0
187	0	0	0
188	0	0	0
189	0	0	0
190	0	0	0
191	0	0	0
192	0	0	0
193	0	0	0
194	0	0	0
195	0	0	0
196	0	0	0
197	0	0	0
198	0	0	0
199	0	0	0
200	0	0	0
201	0	0	0
202	0	0	0
203	0	0	0
204	0	0	0
205	0	0	0
206	0	0	0
207	0	0	0
208	0	0	0
209	0	0	0
210	0	0	0
211	0	0	0
212	0	0	0
213	0	0	0
214	0	0	0
215	0	0	0
216	0	0	0
217	0	0	0
218	0	0	0
219	0	0	0
220	0	0	0
221	0	0	0
222	0	0	0
223	0	0	0
224	0	0	0
225	0	0	0
226	0	0	0
227	0	0	0
228	0	0	0
229	0	0	0
230	0	0	0
231	0	0	0
232	0	0	0
233	0	0	0
234	0	0	0
235	0	0	0
236	0	0	0
237	0	0	0
238	0	0	0
239	0	0	0
240	0	0	0
241	0	0	0
242	0	0	0
243	0	0	0
244	0	0	0
245	0	0	0
246	0	0	0
247	0	0	0
248	0	0	0
249	1	0	0
250	0	1	0
251	0	1	0
252	1	2	0
253	0	0	0
254	1	1	1
255	0	4	4
256	5	6	2
257	9	7	9
258	13	18	6
259	13	21	25
260	14	14	25
261	13	16	25
262	20	12	16
263	13	20	21
264	12	21	14
265	11	15	16
266	16	16	23
267	14	19	17
268	13	13	25
269	15	18	17
270	11	15	18
271	10	14	19
272	17	13	20
273	13	15	17
274	16	12	22
275	12	18	16
276	9	21	22
277	15	13	13
278	15	18	12
279	24	15	12
280	18	11	7
281	13	17	16
282	19	18	24
283	15	15	15
284	23	20	20
285	18	17	14
286	18	19	19
287	20	15	14
288	21	22	15
289	23	19	13
290	16	13	19
291	10	17	10
292	13	17	16
293	12	18	29
294	13	12	13
295	8	22	11
296	9	11	16
297	15	10	19
298	20	24	17
299	17	16	14
300	24	13	18
301	15	14	19
302	17	13	19
303	21	18	14
304	14	17	21
305	13	26	19
306	12	12	21
307	15	22	12
308	11	20	17
309	17	16	21
310	18	15	21
311	8	22	11
312	9	16	19
313	23	12	14
314	23	18	26
315	18	11	20
316	16	13	16
317	20	14	15
318	15	11	15
319	24	23	17
320	14	14	20
321	10	19	20
322	13	16	16
323	22	16	12
324	17	23	8
325	20	12	13
326	11	18	18
327	13	15	18
328	17	19	25
329	16	17	23
330	14	21	13
331	17	28	10
332	15	12	11
333	14	18	13
334	14	13	12
335	18	20	9
336	14	18	14
337	14	18	22
338	15	28	14
339	18	20	18
340	17	14	17
341	13	28	15
342	12	20	12
343	26	14	15
344	11	21	14
345	13	20	14
346	17	17	12
347	9	15	16
348	8	10	18
349	10	22	19
350	14	18	16
351	11	22	14
352	10	11	21
353	18	14	21
354	10	19	17
355	20	12	10
356	10	15	17
357	13	23	19
358	17	17	13
359	18	18	16
360	14	16	14
361	20	16	15
362	15	15	19
363	14	15	27
364	7	18	16
365	8	15	24
366	18	14	19
367	13	17	17
368	18	27	24
369	11	15	19
370	16	20	18
371	15	14	20
372	16	16	17
373	13	26	17
374	17	18	16
375	14	14	22
376	21	14	14
377	16	20	21
378	21	19	26
379	19	15	13
380	25	17	15
381	13	20	23
382	12	14	13
383	20	14	20
384	16	20	15
385	11	25	16
386	14	15	19
387	11	15	17
388	23	16	20
389	11	14	19
390	16	18	19
391	10	8	16
392	14	14	14
393	15	27	16
394	20	23	17
395	24	12	12
396	15	27	22
397	10	16	21
398	11	16	20
399	17	17	16
400	18	6	16
401	11	19	19
402	20	19	24
403	19	15	18
404	12	12	14
405	11	15	18
406	18	12	18
407	14	21	14
408	15	24	25
409	15	15	24
410	17	19	16
411	15	16	14
412	9	18	16
413	11	15	18
414	10	17	18
415	11	14	21
416	14	13	13
417	19	14	17
418	23	25	18
419	19	15	22
420	25	15	13
421	14	21	16
422	22	13	14
423	14	18	17
424	14	12	11
425	9	19	16
426	16	22	17
427	23	16	25
428	21	21	22
429	18	17	18
430	13	19	13
431	12	18	11
432	21	13	20
433	17	17	17
434	19	15	21
435	12	19	18
436	16	16	14
437	17	25	13
438	17	24	12
439	11	19	13
440	14	14	18
441	15	27	19
442	12	20	21
443	12	19	19
444	16	19	18
445	20	15	8
446	17	17	18
447	9	10	18
448	18	18	22
449	25	13	19
450	14	17	24
451	15	18	17
452	13	14	21
453	17	25	15
454	15	13	20
455	16	17	16
456	9	18	22
457	16	20	18
458	17	21	24
459	17	17	13
460	17	20	17
461	13	23	20
462	16	18	17
463	9	14	17
464	24	20	16
465	21	15	17
466	19	14	15
467	22	30	14
468	16	12	19
469	12	12	22
470	17	12	17
471	12	18	12
472	9	12	10
473	19	16	12
474	21	17	19
475	16	14	23
476	9	15	17
477	21	13	19
478	18	19	14
479	19	17	14
480	22	18	15
481	11	15	18
482	22	26	14
483	19	16	17
484	11	20	16
485	21	16	21
486	13	13	22
487	16	24	25
488	24	23	15
489	16	23	24
490	6	20	19
491	14	15	18
492	16	21	24
493	13	16	17
494	11	20	22
495	14	17	24
496	19	24	19
497	17	17	18
498	10	28	20
499	20	22	19
500	10	14	25
501	14	14	20
502	11	12	15
503	14	14	25
504	24	17	15
505	17	15	15
506	12	24	16
507	15	18	18
508	18	19	11
509	12	17	14
510	10	18	20
511	18	14	24
512	12	13	14
513	18	20	21
514	15	13	20
515	15	16	14
516	15	16	21
517	16	16	16
518	20	12	19
519	21	21	19
520	15	13	13
521	18	20	22
522	19	24	25
523	11	17	16
524	15	13	19
525	20	14	19
526	14	13	17
527	15	19	27
528	16	11	13
529	15	20	21
530	16	15	22
531	14	22	24
532	16	23	22
533	6	21	17
534	14	20	10
535	13	17	17
536	12	16	17
537	15	19	15
538	17	15	23
539	25	12	13
540	26	15	20
541	19	19	17
542	16	15	14
543	14	12	14
544	12	15	19
545	17	23	22
546	18	13	24
547	17	15	22
548	17	13	16
549	12	19	13
550	11	18	17
551	14	16	15
552	12	20	17
553	13	14	26
554	10	23	18
555	11	17	12
556	10	17	18
557	10	24	14
558	16	21	13
559	16	11	14
560	18	13	14
561	20	13	17
562	21	18	15
563	12	18	15
564	19	15	18
565	22	16	18
566	13	23	18
567	16	15	14
568	18	22	17
569	16	16	29
570	14	17	13
571	17	17	14
572	17	18	14
573	21	25	29
574	18	20	14
575	18	18	17
576	13	22	20
577	16	23	23
578	12	23	17
579	14	25	14
580	21	28	23
581	16	20	18
582	13	13	18
583	13	18	23
584	16	21	25
585	15	10	19
586	12	18	18
587	15	21	25
588	22	21	11
589	10	18	13
590	14	24	14
591	14	21	21
592	16	17	21
593	16	25	19
594	26	14	21
595	15	22	25
596	14	17	12
597	16	15	24
598	13	17	15
599	22	15	22
600	20	20	15
601	18	15	17
602	15	16	11
603	18	20	19
604	18	22	14
605	15	18	16
606	17	19	28
607	34	22	14
608	19	16	13
609	17	18	20
610	15	20	21
611	16	11	21
612	32	23	20
613	11	27	20
614	12	16	9
615	21	25	21
616	11	10	20
617	16	16	18
618	11	19	11
619	15	15	17
620	19	22	21
621	20	11	14
622	12	17	20
623	15	14	15
624	18	16	15
625	21	16	20
626	18	18	25
627	14	16	27
628	13	18	18
629	13	15	18
630	18	20	17
631	15	19	21
632	10	22	19
633	12	18	18
634	9	13	19
635	18	21	21
636	9	17	31
637	16	18	21
638	21	24	13
639	16	16	13
640	15	13	24
641	22	12	19
642	14	20	16
643	8	20	14
644	24	18	19
645	12	16	17
646	22	16	14
647	11	13	12
648	16	18	19
649	18	9	20
650	14	24	18
651	15	22	31
652	19	23	21
653	25	16	14
654	10	18	18
655	15	17	23
656	10	17	22
657	11	25	22
658	22	23	22
659	19	32	23
660	14	29	14
661	13	15	17
662	23	15	17
663	19	15	20
664	20	17	24
665	14	15	15
666	25	14	14
667	17	18	25
668	19	18	16
669	18	16	13
670	21	21	20
671	15	30	22
672	21	13	15
673	16	18	15
674	20	23	22
675	19	22	12
676	12	20	16
677	19	9	32
678	18	24	13
679	13	21	23
680	10	17	21
681	14	22	27
682	12	19	16
683	11	21	20
684	7	17	22
685	25	13	16
686	20	15	18
687	18	20	19
688	18	18	24
689	17	21	20
690	14	13	13
691	17	19	11
692	15	23	20
693	14	16	22
694	19	24	21
695	19	21	27
696	14	10	12
697	17	16	15
698	20	22	16
699	23	17	14
700	19	17	20
701	12	18	21
702	18	26	28
703	22	22	26
704	19	23	18
705	11	16	17
706	13	17	23
707	17	15	16
708	12	24	23
709	14	22	24
710	21	23	16
711	20	20	17
712	14	28	13
713	27	26	12
714	23	16	21
715	19	25	24
716	20	25	20
717	21	14	27
718	19	22	24
719	20	25	21
720	14	18	31
721	17	18	23
722	19	19	21
723	19	19	25
724	20	11	25
725	20	13	18
726	16	19	18
727	18	13	20
728	10	15	22
729	14	22	13
730	13	21	17
731	14	15	20
732	15	19	16
733	18	19	15
734	17	13	20
735	16	7	22
736	13	22	17
737	19	16	28
738	10	20	18
739	21	26	23
740	11	19	18
741	13	19	13
742	15	14	19
743	21	17	26
744	16	23	13
745	14	17	13
746	13	25	15
747	22	24	24
748	13	13	15
749	15	15	21
750	21	20	23
751	13	28	22
752	11	28	16
753	15	30	15
754	12	22	12
755	12	21	22
756	17	24	21
757	24	16	19
758	18	25	24
759	18	18	26
760	23	11	29
761	20	22	17
762	20	22	13
763	13	20	17
764	15	19	19
765	20	15	17
766	21	20	22
767	26	27	27
768	22	17	17
769	12	13	13
770	22	21	22
771	20	18	18
772	19	18	18
773	19	22	16
774	17	22	24
775	19	27	16
776	22	16	27
777	22	19	15
778	19	21	29
779	16	18	12
780	19	19	23
781	16	13	26
782	20	17	24
783	16	21	30
784	28	23	20
785	25	17	29
786	20	34	20
787	15	25	19
788	22	24	16
789	24	19	19
790	22	21	30
791	23	26	12
792	19	20	12
793	20	14	19
794	14	26	22
795	13	19	22
796	18	21	25
797	20	19	27
798	12	17	19
799	28	20	24
800	15	19	16
801	22	23	20
802	23	21	13
803	19	16	17
804	19	13	23
805	19	19	19
806	19	31	15
807	13	21	24
808	22	20	21
809	22	26	21
810	23	28	18
811	17	24	19
812	13	23	24
813	23	25	25
814	18	22	16
815	18	31	26
816	18	25	24
817	26	26	14
818	21	24	16
819	20	20	28
820	15	22	18
821	22	23	22
822	11	33	21
823	20	22	16
824	19	28	17
825	13	24	17
826	25	20	28
827	20	15	14
828	15	28	20
829	20	16	22
830	12	28	13
831	21	16	19
832	18	19	14
833	22	23	25
834	18	23	27
835	19	24	18
836	26	15	23
837	18	18	29
838	19	17	27
839	22	18	28
840	19	20	25
841	19	13	18
842	15	20	17
843	14	12	19
844	28	19	25
845	16	22	19
846	18	24	14
847	20	18	23
848	19	25	28
849	19	21	15
850	14	16	25
851	19	15	27
852	17	19	13
853	15	25	19
854	13	18	20
855	19	16	20
856	18	20	27
857	18	20	31
858	19	20	27
859	24	27	23
860	13	26	23
861	15	26	21
862	13	21	23
863	20	20	22
864	18	25	18
865	19	10	25
866	22	31	23
867	25	21	20
868	16	20	22
869	19	24	21
870	19	27	24
871	31	23	21
872	14	17	27
873	17	17	17
874	14	23	21
875	12	27	38
876	19	19	20
877	20	18	17
878	20	24	29
879	14	20	20
880	30	32	29
881	26	24	27
882	15	25	19
883	9	23	25
884	19	21	25
885	17	15	26
886	18	22	24
887	13	17	21
888	33	13	17
889	19	28	32
890	25	27	14
891	18	26	38
892	14	22	14
893	21	17	22
894	23	25	27
895	27	26	23
896	18	20	16
897	20	24	24
898	21	21	25
899	15	33	24
900	26	22	29
901	17	18	21
902	25	25	24
903	12	20	21
904	20	13	16
905	23	24	30
906	24	25	25
907	14	21	24
908	25	33	23
909	29	26	28
910	20	28	17
911	20	33	18
912	15	27	23
913	16	24	19
914	19	25	19
915	20	22	20
916	13	28	28
917	28	39	27
918	27	21	23
919	23	22	20
920	16	25	25
921	23	32	20
922	22	22	18
923	22	32	26
924	19	21	21
925	23	18	20
926	14	22	23
927	24	16	20
928	27	20	26
929	27	32	26
930	20	29	20
931	20	25	22
932	24	34	27
933	18	21	25
934	23	15	24
935	25	28	15
936	28	24	24
937	24	30	23
938	22	24	24
939	22	30	21
940	18	28	29
941	24	23	22
942	21	21	22
943	19	25	24
944	20	25	23
945	26	24	27
946	27	25	25
947	28	33	28
948	28	22	34
949	26	26	33
950	25	22	28
951	25	24	36
952	24	35	35
953	32	37	46
954	26	31	45
955	49	46	46
956	28	45	63
957	35	36	56
958	59	59	87
959	61	60	100
960	68	63	99
961	84	88	137
962	98	98	169
963	140	120	220
964	147	139	232
965	162	178	298
966	214	186	314
967	249	230	410
968	312	337	464
969	364	336	533
970	403	395	647
971	454	460	780
972	513	551	840
973	605	607	1008
974	719	767	1128
975	847	838	1253
976	917	941	1401
977	1070	1035	1625
978	1163	1179	1780
979	1325	1424	2115
980	1554	1640	2255
981	1720	1764	2545
982	1899	1952	2788
983	2200	2227	3209
984	2379	2531	3465
985	2709	2709	3884
986	3023	3122	4323
987	3263	3317	4687
988	3702	3860	5238
989	4082	4188	5820
990	4476	4579	6349
991	4970	5033	6890
992	5570	5734	7847
993	5952	6326	8447
994	6806	6955	9508
995	7400	7780	10472
996	8117	8650	11683
997	9086	9858	12876
998	10047	10714	14050
999	10959	11938	15523
1000	12190	13259	16465
1001	13257	14541	18256
1002	14947	16084	19869
1003	16317	17639	20932
1004	17589	19510	22205
1005	18768	20727	23776
1006	20272	22294	24829
1007	21539	23644	25737
1008	22676	25250	26908
1009	23540	26645	27352
1010	24512	27568	28180
1011	25073	28312	27909
1012	25890	29259	28072
1013	26202	29515	28308
1014	26244	30210	28151
1015	26470	30086	27819
1016	26178	30195	27445
1017	26345	29871	26659
1018	25524	29580	26232
1019	25186	29101	25330
1020	24419	28538	24963
1021	23871	27696	23981
1022	23215	26832	23532
1023	22241	26305	22569
1024	21932	25630	21675
1025	20894	24496	20918
1026	20304	23522	20237
1027	19342	22799	19688
1028	18764	21933	18958
1029	18081	21274	18080
1030	17245	20449	17588
1031	16849	19675	16780
1032	16055	18791	16167
1033	15352	18248	15717
1034	14546	17588	15092
1035	14247	16857	14441
1036	13436	16184	14131
1037	13002	15504	13384
1038	12410	14807	12904
1039	11941	14362	12636
1040	11235	13559	11962
1041	10825	13073	11588
1042	10293	12649	11032
1043	9941	12219	10750
1044	9576	11523	10286
1045	9227	11052	10112
1046	8657	10759	9428
1047	8470	10322	9424
1048	7907	9665	8998
1049	7627	9383	8555
1050	7171	8974	8199
1051	7046	8611	7918
1052	6880	8122	7842
1053	6491	8055	7399
1054	6060	7623	7043
1055	5913	7310	6884
1056	5651	7012	6624
1057	5338	6648	6321
1058	5255	6478	6262
1059	4955	6030	5958
1060	4741	5990	5641
1061	4591	5632	5470
1062	4314	5543	5494
1063	4226	5305	5209
1064	4040	5145	4932
1065	3785	4769	4792
1066	3671	4615	4574
1067	3478	4517	4485
1068	3425	4242	4458
1069	3344	4131	4115
1070	3132	4017	4005
1071	2970	3843	3852
1072	2869	3620	3805
1073	2765	3457	3653
1074	2579	3333	3630
1075	2535	3212	3436
1076	2489	3131	3306
1077	2376	2937	3254
1078	2187	2969	3123
1079	2210	2697	2963
1080	2052	2693	2780
1081	2010	2563	2823
1082	1880	2465	2661
1083	1872	2451	2674
1084	1728	2287	2530
1085	1745	2197	2458
1086	1631	2075	2387
1087	1557	1974	2317
1088	1516	2016	2264
1089	1425	1948	2193
1090	1400	1791	2023
1091	1370	1728	2000
1092	1359	1697	1945
1093	1201	1587	1936
1094	1210	1605	1908
1095	1129	1568	1719
1096	1057	1469	1710
1097	1097	1435	1714
1098	963	1354	1583
1099	939	1299	1636
1100	935	1246	1511
1101	989	1217	1408
1102	911	1217	1406
1103	819	1113	1370
1104	819	1034	1348
1105	812	1049	1321
1106	767	976	1272
1107	692	946	1206
1108	738	953	1225
1109	629	871	1169
1110	703	854	1151
1111	575	821	1079
1112	602	789	1038
1113	557	813	1011
1114	581	726	967
1115	513	707	964
1116	531	686	922
1117	531	669	937
1118	495	668	846
1119	417	614	840
1120	412	601	809
1121	420	517	793
1122	387	571	753
1123	366	530	778
1124	413	489	718
1125	393	530	732
1126	328	484	739
1127	349	463	714
1128	353	413	664
1129	334	390	647
1130	264	385	655
1131	273	387	622
1132	285	377	625
1133	276	386	546
1134	274	381	556
1135	255	353	574
1136	236	330	532
1137	244	336	522
1138	229	313	467
1139	228	316	475
1140	209	280	435
1141	224	285	427
1142	182	245	420
1143	184	256	429
1144	193	250	439
1145	179	238	438
1146	200	223	449
1147	166	251	403
1148	181	215	380
1149	167	204	376
1150	156	215	350
1151	165	213	336
1152	121	184	337
1153	133	206	339
1154	131	165	330
1155	133	171	318
1156	124	185	299
1157	125	150	289
1158	136	151	280
1159	119	158	279
1160	121	125	266
1161	115	144	262
1162	97	151	277
1163	88	134	279
1164	97	129	271
1165	107	109	211
1166	111	126	245
1167	90	137	236
1168	86	129	223
1169	91	103	227
1170	84	127	234
1171	77	103	191
1172	85	93	202
1173	84	105	192
1174	72	103	182
1175	66	91	226
1176	82	112	200
1177	64	89	182
1178	58	84	175
1179	60	88	173
1180	63	76	166
1181	52	78	181
1182	66	75	157
1183	60	90	160
1184	59	87	146
1185	57	66	147
1186	59	83	151
1187	45	68	169
1188	40	80	139
1189	47	92	156
1190	52	66	126
1191	39	67	103
1192	42	59	135
1193	52	47	126
1194	43	66	123
1195	42	67	112
1196	50	57	124
1197	45	61	114
1198	39	49	108
1199	38	48	117
1200	44	45	99
1201	45	55	126
1202	35	41	102
1203	38	48	96
1204	39	46	103
1205	47	48	95
1206	41	41	122
1207	37	51	91
1208	36	37	113
1209	29	46	89
1210	39	33	98
1211	32	40	78
1212	20	42	77
1213	37	33	69
1214	30	48	86
1215	34	38	89
1216	43	29	64
1217	33	39	89
1218	23	37	70
1219	23	33	64
1220	25	31	70
1221	23	38	67
1222	37	28	66
1223	28	47	77
1224	27	36	71
1225	32	22	54
1226	28	41	58
1227	20	26	54
1228	31	35	66
1229	21	29	57
1230	32	30	54
1231	20	34	54
1232	21	36	71
1233	22	36	51
1234	20	29	59
1235	21	24	55
1236	18	35	56
1237	30	22	50
1238	25	27	56
1239	18	27	45
1240	15	29	46
1241	26	27	48
1242	26	32	39
1243	19	21	43
1244	27	36	60
1245	24	24	54
1246	19	32	47
1247	25	26	45
1248	18	27	58
1249	23	22	56
1250	21	23	35
1251	21	21	39
1252	15	23	33
1253	10	24	43
1254	32	30	32
1255	20	33	37
1256	17	21	36
1257	22	23	43
1258	26	31	30
1259	16	23	39
1260	18	35	41
1261	17	19	29
1262	21	28	45
1263	15	26	41
1264	23	22	50
1265	23	25	24
1266	23	21	40
1267	19	26	42
1268	22	22	37
1269	18	21	44
1270	18	15	36
1271	27	26	33
1272	20	23	34
1273	22	18	36
1274	13	28	39
1275	12	22	32
1276	20	29	30
1277	16	25	35
1278	22	26	34
1279	15	22	28
1280	12	18	41
1281	14	26	23
1282	20	17	36
1283	12	20	33
1284	11	19	24
1285	22	16	25
1286	18	23	35
1287	17	25	34
1288	19	17	35
1289	16	19	32
1290	20	16	26
1291	25	24	30
1292	13	16	28
1293	19	19	33
1294	17	14	39
1295	22	15	44
1296	24	25	29
1297	28	14	29
1298	20	17	30
1299	22	25	16
1300	21	22	29
1301	16	26	22
1302	14	23	28
1303	15	15	33
1304	17	28	23
1305	22	22	33
1306	16	18	29
1307	19	17	24
1308	16	19	32
1309	23	18	22
1310	21	14	19
1311	18	17	19
1312	20	25	26
1313	23	17	32
1314	24	17	21
1315	16	20	23
1316	12	14	17
1317	15	19	20
1318	19	19	21
1319	24	25	23
1320	13	15	26
1321	27	20	28
1322	13	16	32
1323	12	26	24
1324	16	25	24
1325	21	20	24
1326	18	15	22
1327	10	26	21
1328	16	24	27
1329	15	13	20
1330	19	26	20
1331	16	21	20
1332	18	23	19
1333	21	23	23
1334	13	22	19
1335	14	16	27
1336	15	14	18
1337	13	14	30
1338	14	16	18
1339	12	16	23
1340	18	26	24
1341	14	20	27
1342	11	21	20
1343	17	22	24
1344	11	13	27
1345	15	16	25
1346	19	30	25
1347	15	21	28
1348	18	23	14
1349	12	16	22
1350	17	14	17
1351	16	15	25
1352	17	24	21
1353	19	12	16
1354	25	16	32
1355	17	16	27
1356	15	18	22
1357	13	20	19
1358	12	23	23
1359	23	14	20
1360	19	23	20
1361	15	23	20
1362	20	20	18
1363	11	13	17
1364	13	14	14
1365	20	16	20
1366	16	19	23
1367	11	24	22
1368	16	19	20
1369	25	21	14
1370	17	15	22
1371	26	18	26
1372	14	28	18
1373	17	9	17
1374	17	17	21
1375	4	16	18
1376	14	12	14
1377	17	23	17
1378	18	23	22
1379	27	19	19
1380	10	22	24
1381	11	21	20
1382	25	21	17
1383	19	18	13
1384	26	21	11
1385	16	13	13
1386	12	22	17
1387	14	25	21
1388	13	29	14
1389	12	24	16
1390	13	19	20
1391	8	20	15
1392	24	25	26
1393	15	17	20
1394	17	19	23
1395	24	17	20
1396	12	22	22
1397	9	19	15
1398	17	23	17
1399	14	23	20
1400	15	15	18
1401	18	21	18
1402	12	18	20
1403	11	15	15
1404	21	18	14
1405	23	20	9
1406	19	16	22
1407	15	15	23
1408	14	10	19
1409	16	16	23
1410	19	21	19
1411	18	30	8
1412	14	15	23
1413	18	11	17
1414	14	18	15
1415	16	17	19
1416	13	23	16
1417	21	25	18
1418	6	11	18
1419	15	19	27
1420	23	16	9
1421	18	15	13
1422	14	18	20
1423	24	21	19
1424	14	17	21
1425	16	20	23
1426	17	15	17
1427	18	20	24
1428	12	19	11
1429	17	16	11
1430	11	25	24
1431	19	19	15
1432	17	20	14
1433	19	16	23
1434	23	21	12
1435	17	16	22
1436	11	15	21
1437	9	16	20
1438	8	14	23
1439	22	22	21
1440	17	21	14
1441	19	22	18
1442	12	20	24
1443	10	21	11
1444	15	21	14
1445	15	18	18
1446	13	15	28
1447	9	15	14
1448	14	22	20
1449	17	18	12
1450	17	23	7
1451	15	16	19
1452	13	26	29
1453	9	17	7
1454	14	21	23
1455	21	21	19
1456	18	17	24
1457	17	21	18
1458	19	13	16
1459	11	25	25
1460	16	18	18
1461	13	23	15
1462	15	11	17
1463	13	14	16
1464	14	14	21
1465	20	17	13
1466	13	19	16
1467	18	19	16
1468	16	9	17
1469	14	17	22
1470	17	20	19
1471	18	9	18
1472	13	23	17
1473	14	16	20
1474	15	14	18
1475	13	16	15
1476	17	18	20
1477	7	17	27
1478	14	11	18
1479	20	14	12
1480	14	15	17
1481	13	13	24
1482	19	18	15
1483	18	15	18
1484	21	16	13
1485	11	20	29
1486	18	20	14
1487	16	19	10
1488	19	20	21
1489	13	26	18
1490	15	17	15
1491	10	22	18
1492	14	19	22
1493	10	17	19
1494	10	19	18
1495	19	12	14
1496	15	13	15
1497	13	17	17
1498	21	24	10
1499	15	19	19
1500	8	18	13
1501	18	23	19
1502	14	19	17
1503	17	23	19
1504	27	15	20
1505	11	12	12
1506	19	15	19
1507	19	8	17
1508	17	13	16
1509	10	14	20
1510	10	21	17
1511	17	17	26
1512	20	13	18
1513	16	15	27
1514	19	20	18
1515	19	18	22
1516	15	15	15
1517	12	18	17
1518	12	18	23
1519	14	23	12
1520	14	18	16
1521	10	20	13
1522	19	8	16
1523	13	8	16
1524	19	18	23
1525	9	13	21
1526	15	20	22
1527	16	15	21
1528	10	14	21
1529	18	20	24
1530	18	13	12
1531	12	14	15
1532	12	11	15
1533	13	20	16
1534	12	18	20
1535	9	12	15
1536	16	13	19
1537	15	13	10
1538	20	18	13
1539	16	21	12
1540	11	13	21
1541	13	12	15
1542	15	15	17
1543	22	13	17
1544	15	15	16
1545	17	16	18
1546	11	16	19
1547	15	25	21
1548	13	15	14
1549	10	18	18
1550	24	20	19
1551	22	18	13
1552	16	17	23
1553	18	19	15
1554	16	26	10
1555	23	10	11
1556	17	15	15
1557	12	15	18
1558	14	18	18
1559	19	20	20
1560	17	25	14
1561	18	17	16
1562	9	20	13
1563	12	20	14
1564	11	26	17
1565	13	17	15
1566	11	16	24
1567	14	17	25
1568	24	20	16
1569	14	22	17
1570	21	13	30
1571	14	28	14
1572	17	17	21
1573	24	14	15
1574	14	15	23
1575	14	18	20
1576	18	20	15
1577	16	16	18
1578	12	15	16
1579	22	9	11
1580	10	28	15
1581	15	24	22
1582	19	15	15
1583	15	14	17
1584	21	19	12
1585	14	13	24
1586	15	17	10
1587	16	19	20
1588	10	8	14
1589	20	17	24
1590	20	18	10
1591	14	15	13
1592	23	11	21
1593	16	19	21
1594	13	16	22
1595	15	20	18
1596	17	11	18
1597	13	17	17
1598	16	14	11
1599	16	19	15
1600	9	26	15
1601	16	18	16
1602	22	15	17
1603	17	21	16
1604	10	15	18
1605	14	17	20
1606	10	12	10
1607	13	18	22
1608	14	14	17
1609	26	17	18
1610	24	17	16
1611	11	11	15
1612	11	13	24
1613	11	16	9
1614	9	9	20
1615	13	16	23
1616	13	18	16
1617	9	12	21
1618	12	14	16
1619	18	17	13
1620	16	12	22
1621	7	17	23
1622	19	17	24
1623	13	17	14
1624	17	17	19
1625	16	18	13
1626	20	21	12
1627	19	19	20
1628	13	12	14
1629	11	18	24
1630	19	13	13
1631	9	15	23
1632	15	20	15
1633	12	21	15
1634	13	20	12
1635	12	17	21
1636	14	15	14
1637	7	20	15
1638	25	8	18
1639	20	13	14
1640	7	8	19
1641	17	20	16
1642	19	18	19
1643	14	14	15
1644	19	24	19
1645	14	26	22
1646	13	11	14
1647	8	11	11
1648	6	15	14
1649	11	19	14
1650	9	15	14
1651	20	14	14
1652	14	17	18
1653	10	20	17
1654	24	21	21
1655	8	21	16
1656	18	22	18
1657	17	15	19
1658	11	14	15
1659	12	19	13
1660	15	16	19
1661	11	22	15
1662	17	27	14
1663	14	22	17
1664	20	15	19
1665	15	18	12
1666	14	17	22
1667	9	18	13
1668	16	19	17
1669	15	12	10
1670	18	13	20
1671	11	19	20
1672	12	19	10
1673	14	20	15
1674	10	16	26
1675	18	13	14
1676	14	21	22
1677	15	16	20
1678	20	18	16
1679	9	19	22
1680	21	16	18
1681	18	15	15
1682	19	17	19
1683	13	23	16
1684	24	11	15
1685	14	17	19
1686	19	14	18
1687	9	12	18
1688	6	14	13
1689	18	19	15
1690	15	19	17
1691	16	19	26
1692	16	21	16
1693	13	22	18
1694	11	17	24
1695	9	12	24
1696	21	14	13
1697	19	17	17
1698	8	12	13
1699	10	13	14
1700	18	20	17
1701	12	16	13
1702	14	7	13
1703	15	16	27
1704	18	22	22
1705	7	19	16
1706	18	17	12
1707	16	17	22
1708	9	19	15
1709	16	18	17
1710	17	19	12
1711	16	19	14
1712	21	18	15
1713	22	21	11
1714	19	15	22
1715	11	20	15
1716	12	10	23
1717	13	19	19
1718	13	19	10
1719	11	14	14
1720	13	14	15
1721	16	19	11
1722	18	19	19
1723	16	9	21
1724	9	15	17
1725	12	15	15
1726	11	21	13
1727	11	15	16
1728	10	20	15
1729	20	16	13
1730	13	17	15
1731	15	14	13
1732	22	16	18
1733	16	18	15
1734	18	19	11
1735	11	20	12
1736	13	14	15
1737	16	21	13
1738	16	5	15
1739	24	15	17
1740	14	13	14
1741	12	5	28
1742	16	17	13
1743	14	21	20
1744	12	15	17
1745	14	16	20
1746	13	18	22
1747	16	16	16
1748	16	19	16
1749	15	16	17
1750	10	10	15
1751	15	22	19
1752	17	14	20
1753	15	20	17
1754	13	20	17
1755	20	9	21
1756	14	21	11
1757	15	15	15
1758	17	23	14
1759	16	13	15
1760	18	14	15
1761	12	19	15
1762	11	11	16
1763	12	16	16
1764	10	19	21
1765	25	19	12
1766	12	13	7
1767	13	17	18
1768	21	16	10
1769	14	20	20
1770	14	18	20
1771	16	15	19
1772	8	17	16
1773	13	15	20
1774	21	17	11
1775	8	21	21
1776	14	23	16
1777	20	15	20
1778	16	18	14
1779	18	17	15
1780	15	22	21
1781	10	15	17
1782	17	22	21
1783	16	23	15
1784	12	15	15
1785	13	19	16
1786	15	12	12
1787	12	17	17
1788	11	23	13
1789	14	14	15
1790	19	18	12
1791	22	21	15
1792	16	21	16
1793	9	16	13
1794	19	15	17
1795	16	15	19
1796	22	10	19
1797	19	17	18
1798	16	15	19
1799	13	20	16
1800	17	19	21
1801	18	13	11
1802	14	20	14
1803	14	11	11
1804	17	15	21
1805	17	18	19
1806	11	13	20
1807	18	20	17
1808	18	21	12
1809	13	13	17
1810	16	16	22
1811	9	15	16
1812	18	23	19
1813	15	17	23
1814	19	25	18
1815	11	14	18
1816	12	17	14
1817	14	17	13
1818	11	15	23
1819	11	10	16
1820	9	15	10
1821	12	20	20
1822	16	19	19
1823	17	17	15
1824	9	16	19
1825	14	24	13
1826	16	28	20
1827	18	16	13
1828	10	9	20
1829	19	21	24
1830	20	17	20
1831	8	18	11
1832	21	13	22
1833	10	14	18
1834	11	16	12
1835	11	16	20
1836	13	14	15
1837	17	16	14
1838	9	25	14
1839	17	28	19
1840	21	10	20
1841	17	17	15
1842	14	11	14
1843	17	19	19
1844	20	19	12
1845	11	20	15
1846	17	18	14
1847	7	18	19
1848	18	17	22
1849	19	16	22
1850	14	14	19
1851	8	24	23
1852	18	14	20
1853	18	12	9
1854	9	22	16
1855	10	20	15
1856	23	22	14
1857	15	21	16
1858	18	22	9
1859	23	16	21
1860	18	18	18
1861	14	17	19
1862	10	21	17
1863	20	16	19
1864	19	20	17
1865	6	18	19
1866	16	16	19
1867	14	9	17
1868	15	23	9
1869	15	17	15
1870	12	22	13
1871	11	16	20
1872	12	14	22
1873	13	21	18
1874	13	22	10
1875	14	17	18
1876	9	10	16
1877	13	20	21
1878	15	8	15
1879	10	23	16
1880	14	21	22
1881	18	14	12
1882	19	20	8
1883	14	17	12
1884	20	16	16
1885	18	22	13
1886	12	15	21
1887	26	14	17
1888	18	21	22
1889	18	14	16
1890	13	18	13
1891	18	15	14
1892	11	11	18
1893	15	14	21
1894	13	16	16
1895	11	20	10
1896	12	17	22
1897	12	19	17
1898	11	20	12
1899	16	17	12
1900	18	14	19
1901	19	9	16
1902	11	16	17
1903	17	13	13
1904	26	13	25
1905	11	18	13
1906	20	11	22
1907	13	23	20
1908	8	23	11
1909	19	18	16
1910	20	20	19
1911	12	16	11
1912	15	16	12
1913	12	29	17
1914	10	21	32
1915	14	15	18
1916	12	19	9
1917	14	18	19
1918	12	28	20
1919	9	14	22
1920	19	20	29
1921	13	9	15
1922	12	21	12
1923	10	13	19
1924	12	20	13
1925	11	22	22
1926	18	12	20
1927	12	18	17
1928	14	18	26
1929	17	15	18
1930	13	15	15
1931	13	21	21
1932	15	19	16
1933	23	15	18
1934	17	21	18
1935	19	18	21
1936	17	14	19
1937	14	15	14
1938	27	16	13
1939	23	18	22
1940	18	12	17
1941	11	29	17
1942	15	18	10
1943	13	13	15
1944	12	11	23
1945	13	22	18
1946	6	19	16
1947	10	11	16
1948	12	22	18
1949	13	14	18
1950	13	16	25
1951	19	9	12
1952	19	12	9
1953	6	22	23
1954	16	21	24
1955	15	16	21
1956	17	12	22
1957	21	16	15
1958	9	12	16
1959	14	16	28
1960	14	14	18
1961	16	18	19
1962	28	12	26
1963	17	16	17
1964	8	21	15
1965	20	12	12
1966	16	14	14
1967	18	15	22
1968	16	19	20
1969	17	22	21
1970	11	13	20
1971	10	22	16
1972	12	15	21
1973	10	19	15
1974	15	11	19
1975	12	11	15
1976	12	17	18
1977	20	29	14
1978	9	18	19
1979	23	16	13
1980	16	7	23
1981	13	13	22
1982	12	15	21
1983	20	17	22
1984	12	17	13
1985	16	18	16
1986	13	14	12
1987	12	17	15
1988	11	20	16
1989	13	16	11
1990	11	16	10
1991	13	14	16
1992	12	11	17
1993	14	23	6
1994	17	20	16
1995	17	14	18
1996	25	19	20
1997	11	16	16
1998	12	17	14
1999	17	16	15
[truncated: 2,097 more rows]

## Sheet: Fig. 2h
moox-0							moox-2							moox-5							moox-10							moox-15
537	15071.3	15140.9	15061.3	15061.3	15061.7	15140.6	537.05	13360.2	13158.5	13091.2	13111.1	13091.2	13138.6	537.03	14722.4	14752.1	14715.4	14752.1	14715.4	14715.4	537.05	13048.3	13076.5	13041.3	13062.4	13041.3	13055.4	537.02	14826.9	14830.1	14811.9	14830.1	14811.9	14811.9
536.95	14743	15132.7	15051.3	15051.3	15051.7	15132.3	537	13230	13152.7	13084.1	13104.3	13084.1	13132.5	536.98	14806.9	14745.7	14708.4	14745.7	14708.4	14708.4	537	12665.9	13070.2	13034.3	13055.8	13034.3	13048.7	536.97	14490.7	14815.4	14796.9	14815.4	14796.9	14796.9
536.9	15089	15124.8	15041.6	15041.6	15042	15124.4	536.95	13474.5	13147	13077	13097.5	13077	13126.5	536.93	14817.9	14739.2	14701.3	14739.2	14701.3	14701.3	536.95	12868.2	13064.1	13027.5	13049.3	13027.5	13042.3	536.92	14810.1	14800.8	14781.9	14800.7	14781.9	14782
536.85	15418.9	15116.6	15031.6	15031.6	15032	15116.2	536.9	13354.7	13141.2	13069.8	13090.7	13069.8	13120.4	536.88	15006	14732.7	14694.2	14732.7	14694.2	14694.2	536.9	13471.5	13058	13020.6	13042.8	13020.6	13035.8	536.87	14643.6	14786.1	14766.9	14786	14766.9	14767
536.8	15291.8	15108.1	15021.1	15021.1	15021.5	15107.7	536.85	13400.1	13135.5	13062.7	13083.9	13062.7	13114.4	536.83	14754.4	14726	14686.9	14726	14686.9	14686.9	536.85	13006.6	13051.5	13013.3	13035.8	13013.3	13029	536.82	15008.2	14771.4	14752	14771.3	14752	14752
536.75	15158.8	15099.8	15010.9	15010.9	15011.3	15099.4	536.8	13590.6	13129.9	13055.5	13077	13055.5	13108.4	536.78	14774.1	14719.5	14679.8	14719.5	14679.8	14679.8	536.8	13227.6	13045.3	13006.4	13029.2	13006.4	13022.4	536.77	14674.2	14756.7	14736.9	14756.6	14736.9	14737
536.7	14798.2	15091.7	15000.7	15000.7	15001.1	15091.2	536.75	13194.9	13124.2	13048.3	13070.1	13048.3	13102.4	536.73	15273.9	14713.1	14672.7	14713.1	14672.7	14672.7	536.75	12853.9	13039	12999.2	13022.4	12999.2	13015.8	536.72	14261.1	14742.1	14721.9	14742	14721.9	14722.1
536.65	14872	15084	14990.9	14990.9	14991.3	15083.6	536.7	12868.4	13118.7	13041.2	13063.4	13041.2	13096.5	536.68	14795.6	14706.2	14665.1	14706.2	14665.1	14665.1	536.7	12717.5	13033	12992.3	13015.9	12992.3	13009.4	536.67	14279.9	14727.5	14707	14727.3	14707	14707.2
536.6	14917.7	15076.3	14981	14981	14981.5	15075.9	536.65	12842.2	13113.4	13034.3	13056.8	13034.3	13090.9	536.63	14808.8	14699.7	14658	14699.7	14658	14658	536.65	12937.2	13027.1	12985.5	13009.4	12985.5	13003.1	536.62	13951.2	14713	14692	14712.7	14692	14692.3
536.55	14866.1	15068.7	14971.1	14971.1	14971.6	15068.2	536.6	13149.2	13108.2	13027.4	13050.3	13027.4	13085.3	536.58	15062.6	14693.3	14650.9	14693.3	14650.9	14650.9	536.6	12735.9	13021.2	12978.5	13002.9	12978.5	12996.8	536.57	14626.6	14698.5	14677.1	14698.2	14677.1	14677.5
536.5	14955.1	15061.1	14961.2	14961.2	14961.7	15060.7	536.55	13542.9	13102.9	13020.4	13043.6	13020.4	13079.6	536.53	14595.9	14686.6	14643.5	14686.6	14643.5	14643.5	536.55	13065.7	13015.4	12971.6	12996.4	12971.6	12990.6	536.52	14538.4	14683.9	14662.1	14683.5	14662.1	14662.5
536.45	15069.9	15053.6	14951.2	14951.2	14951.7	15053.1	536.5	13793.4	13097.4	13013.1	13036.7	13013.1	13073.8	536.48	14343.9	14680.4	14636.5	14680.4	14636.5	14636.5	536.5	13032.6	13009.5	12964.6	12989.8	12964.6	12984.4	536.47	14632.5	14669.4	14647.2	14668.9	14647.2	14647.7
536.4	14784.2	15046	14941.1	14941.1	14941.6	15045.5	536.45	13788.3	13091.9	13005.8	13029.8	13005.8	13068	536.43	14513.9	14674.4	14629.8	14674.4	14629.8	14629.8	536.45	12885	13003.8	12957.5	12983.2	12957.5	12978.2	536.42	14256.1	14655	14632.2	14654.3	14632.2	14632.8
536.35	15028.9	15038.8	14931.3	14931.3	14931.8	15038.3	536.4	13227.7	13086.5	12998.4	13022.8	12998.4	13062.1	536.38	14604.4	14668.3	14622.9	14668.3	14622.9	14622.9	536.4	13097.7	12998.2	12950.6	12976.6	12950.6	12972.2	536.37	14233.6	14640.6	14617.2	14639.7	14617.2	14618.1
536.3	15080.4	15031.4	14921.2	14921.2	14921.7	15030.9	536.35	13404.1	13081.4	12991.3	13016.1	12991.3	13056.6	536.33	14401.9	14662.1	14616	14662.1	14616	14616	536.35	13200.2	12992.7	12943.5	12970	12943.5	12966.2	536.32	13963.8	14626.2	14602.3	14625.1	14602.3	14603.3
536.25	15486.6	15024	14911	14911	14911.5	15023.5	536.3	13380.8	13076.3	12984.1	13009.3	12984.1	13051.1	536.28	14563.4	14656.1	14609.1	14656.1	14609.1	14609.1	536.3	13286.9	12987.2	12936.3	12963.3	12936.3	12960.2	536.27	14190.1	14612	14587.3	14610.6	14587.3	14588.7
536.2	15392	15016.3	14900.4	14900.4	14900.9	15015.8	536.25	13394.8	13071.2	12977	13002.6	12977	13045.6	536.23	14422.8	14650	14602.2	14650	14602.2	14602.2	536.25	12945.1	12981.9	12929.1	12956.6	12929.1	12954.4	536.22	13989.1	14597.8	14572.4	14596.1	14572.4	14574.1
536.15	15469.9	15008.9	14889.8	14889.8	14890.4	15008.3	536.2	13413.9	13066.2	12969.8	12995.8	12969.8	13040.2	536.18	14414.4	14644	14595.4	14644	14595.4	14595.4	536.2	12790.2	12976.9	12922.1	12950	12922.1	12949	536.17	13944.5	14583.8	14557.5	14581.6	14557.5	14559.6
536.1	15585.8	15001.4	14879.2	14879.2	14879.8	15000.9	536.15	13326.6	13061.3	12962.6	12989	12962.6	13034.8	536.13	14741.1	14638	14588.5	14638	14588.5	14588.5	536.15	12742.4	12972.3	12915.2	12943.6	12915.2	12943.9	536.12	14119.2	14569.8	14542.5	14567.1	14542.5	14545.2
536.05	15482.3	14993.9	14868.5	14868.5	14869	14993.4	536.1	13180.9	13056.5	12955.4	12982.3	12955.4	13029.6	536.08	14543.7	14631.8	14581.4	14631.8	14581.4	14581.4	536.1	12324.2	12968	12908.3	12937.2	12908.3	12939.1	536.07	14479.4	14556	14527.6	14552.6	14527.6	14531
536	14849.1	14986.7	14857.8	14857.8	14858.4	14986.1	536.05	13448.4	13051.9	12948.3	12975.7	12948.3	13024.5	536.03	14170.4	14625.7	14574.4	14625.7	14574.4	14574.4	536.05	12844.9	12964.2	12901.7	12931.1	12901.7	12934.8	536.02	14517.5	14542.3	14512.6	14538.1	14512.6	14516.8
535.95	14890.3	14980.2	14847.8	14847.8	14848.4	14979.7	536	13176.5	13047.2	12941.1	12969	12941.1	13019.3	535.98	14381.5	14620.1	14567.8	14620.1	14567.8	14567.8	536	12850.8	12960.5	12894.7	12924.7	12894.7	12930.5	535.97	14436.6	14528.8	14497.6	14523.5	14497.6	14502.8
535.9	15464	14973.9	14837.8	14837.8	14838.3	14973.3	535.95	13333.8	13042.8	12934	12962.4	12934	13014.4	535.93	14727.7	14614.2	14561	14614.2	14561	14561	535.95	12927.1	12957.2	12887.7	12918.3	12887.7	12926.7	535.92	14111.9	14515.5	14482.6	14509	14482.6	14489
535.85	15117.5	14967.1	14827.1	14827.1	14827.7	14966.5	535.9	13417	13038.3	12926.8	12955.7	12926.8	13009.4	535.88	14757.4	14608.1	14553.8	14608	14553.8	14553.9	535.9	13115.6	12954.4	12880.7	12911.8	12880.7	12923.2	535.87	14398.8	14502.5	14467.7	14494.6	14467.7	14475.6
535.8	14985.4	14960.8	14816.8	14816.8	14817.4	14960.2	535.85	13486	13034	12919.6	12949	12919.6	13004.5	535.83	14508.8	14601.9	14546.6	14601.9	14546.6	14546.7	535.85	13069.3	12951.9	12873.6	12905.2	12873.6	12920.2	535.82	14261.1	14489.8	14452.7	14480.1	14452.7	14462.4
535.75	14742.6	14954.8	14806.6	14806.6	14807.2	14954.2	535.8	12864.6	13029.7	12912.3	12942.2	12912.3	12999.7	535.78	14814.3	14596	14539.7	14596	14539.7	14539.7	535.8	12986.6	12950.1	12866.4	12898.7	12866.4	12917.8	535.77	14583.6	14477.5	14437.7	14465.6	14437.7	14449.6
535.7	14952.8	14949.3	14796.6	14796.6	14797.3	14948.6	535.75	13276	13025.8	12905.3	12935.8	12905.3	12995.3	535.73	14754.4	14589.8	14532.4	14589.8	14532.4	14532.5	535.75	13251.5	12949	12859.4	12892.3	12859.4	12916.1	535.72	14029.6	14465.7	14422.7	14451.2	14422.7	14437.2
535.65	14935.1	14943.7	14786.5	14786.5	14787.1	14943	535.7	13065.8	13021.9	12898.2	12929.2	12898.2	12990.8	535.68	14420.6	14583.8	14525.2	14583.7	14525.2	14525.3	535.7	12629.6	12948.6	12852.1	12885.7	12852.1	12915.1	535.67	14108.2	14454.4	14407.7	14436.8	14407.7	14425.4
535.6	14990.3	14938.3	14776.3	14776.3	14777	14937.6	535.65	13235.8	13018.2	12891.1	12922.7	12891.1	12986.5	535.63	14068.2	14578	14518.3	14578	14518.3	14518.4	535.65	12802.4	12949.5	12845.3	12879.5	12845.3	12915.3	535.62	14314.7	14443.8	14392.8	14422.4	14392.8	14414.1
535.55	15193.6	14933.1	14766.1	14766.1	14766.8	14932.4	535.6	13360.6	13014.5	12883.9	12916.2	12883.9	12982.3	535.58	14297.1	14572.7	14511.7	14572.6	14511.7	14511.9	535.6	13237.4	12951.3	12838.3	12873.2	12838.3	12916.5	535.57	13840.6	14433.8	14377.8	14408	14377.8	14403.6
535.5	14654	14927.8	14755.6	14755.6	14756.3	14927.1	535.55	13500.4	13011	12876.7	12909.6	12876.7	12978.1	535.53	13978.4	14567.2	14504.9	14567	14504.9	14505.1	535.55	12930.7	12954	12831	12866.6	12831	12918.4	535.52	14068.1	14424.7	14362.9	14393.7	14362.9	14393.9
535.45	14616.2	14923.4	14745.7	14745.7	14746.5	14922.7	535.5	13169.4	13007.5	12869.4	12902.9	12869.4	12974.1	535.48	14218.6	14562	14498.5	14561.8	14498.5	14498.7	535.5	13400.8	12958.1	12824	12860.3	12824	12921.9	535.47	14570.5	14416.6	14347.9	14379.3	14347.9	14385.1
535.4	14919.3	14919.3	14735.9	14735.9	14736.6	14918.6	535.45	13059.6	13004.5	12862.3	12896.4	12862.3	12970.3	535.43	14571	14556.7	14491.7	14556.3	14491.7	14492.1	535.45	13409.4	12963.4	12816.6	12853.6	12816.6	12926.4	535.42	14253	14409.5	14332.9	14364.9	14332.9	14377.4
535.35	15062	14915.1	14725.7	14725.7	14726.4	14914.4	535.4	12881.8	13001.6	12855.2	12890	12855.2	12966.8	535.38	14325.8	14551.1	14484.6	14550.6	14484.6	14485.2	535.4	12801.5	12970.3	12809.3	12847	12809.3	12932.5	535.37	14277.8	14403.7	14317.9	14350.6	14317.9	14370.9
535.3	14840	14911.1	14715.3	14715.3	14716.1	14910.3	535.35	12822.1	12999.1	12848.2	12883.7	12848.2	12963.6	535.33	14378.6	14545.9	14477.8	14545.1	14477.8	14478.6	535.35	12909.9	12979.4	12802.3	12840.8	12802.3	12940.8	535.32	14525.4	14399.3	14302.9	14336.3	14302.9	14365.9
535.25	14804.7	14907.5	14705.2	14705.2	14706	14906.7	535.3	13200.9	12996.8	12841.2	12877.4	12841.2	12960.6	535.28	14809.3	14540.7	14470.9	14539.6	14470.9	14472	535.3	13250.7	12990.3	12795.2	12834.6	12795.2	12951	535.27	14108.8	14396.5	14287.9	14322	14287.9	14362.4
535.2	14630.3	14904.4	14695.1	14695.1	14695.9	14903.6	535.25	13341.1	12994.6	12834	12871	12834	12957.7	535.23	14383.6	14535.3	14463.6	14533.8	14463.6	14465.1	535.25	12894.2	13003.2	12787.9	12828.1	12787.9	12963	535.22	13845.1	14395.7	14272.9	14307.7	14272.9	14360.8
535.15	14890	14901.8	14685.1	14685.1	14686	14900.9	535.2	13393.6	12992.7	12826.8	12864.5	12826.8	12955	535.18	14404.6	14530.5	14456.6	14528.4	14456.6	14458.7	535.2	12752.5	13018.7	12780.9	12821.9	12780.9	12977.6	535.17	14244.6	14396.9	14257.9	14293.5	14257.9	14361.3
535.1	14697.6	14899.2	14674.9	14674.9	14675.8	14898.3	535.15	13126.2	12991	12819.6	12858	12819.6	12952.6	535.13	14506.7	14525.9	14449.7	14523	14449.7	14452.6	535.15	13020	13036.8	12773.9	12815.8	12773.9	12994.9	535.12	14722.8	14400.5	14242.9	14279.3	14242.9	14364.1
535.05	14840.8	14897.3	14664.9	14664.9	14665.8	14896.4	535.1	12898	12989.9	12812.4	12851.7	12812.4	12950.7	535.08	14091.5	14521.5	14442.6	14517.5	14442.6	14446.6	535.1	13263.6	13057.7	12766.7	12809.6	12766.7	13014.8	535.07	14031.3	14406.5	14227.9	14265.1	14227.9	14369.3
535	15182.3	14895.6	14654.7	14654.7	14655.6	14894.7	535.05	13005.9	12989.3	12805.4	12845.5	12805.4	12949.2	535.03	14421.1	14517.9	14436	14512.5	14436	14441.3	535.05	12928.1	13081.4	12759.4	12803.2	12759.4	13037.6	535.02	14161.6	14415.6	14212.9	14250.9	14212.9	14377.5
534.95	14789.6	14894	14644.1	14644.1	14645.1	14893.1	535	12743.4	12989.1	12798.3	12839.2	12798.3	12948.2	534.98	14347.3	14514.4	14429	14507.3	14429	14436.1	535	13455.3	13108.6	12752.3	12797.1	12752.3	13063.8	534.97	14479.9	14427.8	14197.9	14236.8	14197.9	14388.9
534.9	14480.8	14893.4	14634	14634	14635	14892.4	534.95	13160.5	12989.6	12791.3	12833.1	12791.3	12947.8	534.93	14182.7	14511.7	14422.1	14502.1	14422.1	14431.6	534.95	13017.8	13139	12744.9	12790.6	12744.9	13093.2	534.92	14314.4	14443.5	14182.9	14222.6	14182.9	14403.7
534.85	14794	14893.5	14624.1	14624.1	14625.1	14892.5	534.9	13217	12990.5	12784.2	12826.9	12784.2	12947.8	534.88	14310.1	14509.9	14415.3	14497.2	14415.3	14428	534.9	12802.2	13173.4	12737.7	12784.5	12737.7	13126.6	534.87	14123.5	14463	14167.9	14208.5	14167.9	14422.3
534.8	15315.1	14893.9	14614	14614	14615	14892.9	534.85	12917.2	12992.1	12777	12820.6	12777	12948.5	534.83	14368.9	14508.9	14408.4	14492.2	14408.4	14425.1	534.85	13344	13212.1	12730.7	12778.6	12730.7	13164.2	534.82	14476.5	14486.7	14152.9	14194.5	14152.9	14445.1
534.75	14721.6	14894.3	14603.2	14603.2	14604.3	14893.3	534.8	13076.3	12994.6	12769.9	12814.5	12769.9	12950	534.78	13959.6	14509.1	14401.4	14487.2	14401.4	14423.3	534.8	13186.2	13254.6	12723.3	12772.3	12723.3	13205.6	534.77	14079.6	14514.9	14137.8	14180.4	14137.8	14472.3
534.7	14675.7	14896.1	14593.1	14593.1	14594.2	14895	534.75	13062.3	12998	12762.8	12808.4	12762.8	12952.4	534.73	13847	14511.2	14394.9	14482.7	14394.9	14423.4	534.75	13422.8	13301.7	12716	12766.2	12716	13251.5	534.72	14420.5	14548.1	14122.8	14166.5	14122.8	14504.5
534.65	14992.6	14898.5	14583	14583	14584.1	14897.4	534.7	12657.3	13002.3	12755.6	12802.2	12755.6	12955.7	534.68	14209.6	14515.1	14388.4	14478.3	14388.4	14425.2	534.7	13382	13353.4	12708.6	12759.9	12708.6	13302	534.67	14589.1	14586.4	14107.8	14152.5	14107.8	14541.7
534.6	14802.9	14901.4	14572.5	14572.5	14573.7	14900.2	534.65	12861.2	13008.1	12748.7	12796.4	12748.7	12960.4	534.63	14073	14520.9	14381.5	14473.7	14381.6	14428.8	534.65	13401.6	13410	12701.1	12753.7	12701.2	13357.4	534.62	14817.1	14630.3	14092.7	14138.5	14092.8	14584.5
534.55	14699.9	14905.3	14562.3	14562.3	14563.5	14904.1	534.6	12633.9	13015.1	12741.6	12790.4	12741.6	12966.3	534.58	14251.5	14529.5	14374.9	14469.2	14374.9	14435	534.6	13449.2	13471.8	12693.7	12747.6	12693.8	13417.8	534.57	14926.3	14680	14077.6	14124.5	14077.7	14633
534.5	14455.8	14910.2	14552.1	14552.1	14553.4	14908.9	534.55	12870.6	13023.7	12734.7	12784.6	12734.7	12973.8	534.53	14587.9	14540.9	14368	14464.7	14368	14444.2	534.55	13210.1	13538.7	12686.2	12741.5	12686.4	13483.4	534.52	14939	14735.9	14062.5	14110.6	14062.6	14687.7
534.45	13919	14916.3	14542.2	14542.2	14543.5	14915	534.5	12811.2	13033.9	12727.6	12778.7	12727.6	12982.8	534.48	14608.5	14555.8	14360.8	14460	14360.8	14456.6	534.5	13923.6	13611.2	12678.9	12735.5	12679.1	13554.4	534.47	14895.6	14798.4	14047.4	14096.7	14047.5	14748.9
534.4	14585.9	14924	14532.9	14532.9	14534.3	14922.7	534.45	12901.4	13046.1	12720.6	12772.9	12720.6	12993.8	534.43	14814	14575	14353.5	14455.2	14353.6	14473.2	534.45	13777.3	13688.6	12671.1	12729.2	12671.4	13630.3	534.42	14881.8	14867.5	14032.3	14082.9	14032.4	14816.7
534.35	14849.1	14932.1	14522.9	14522.9	14524.2	14930.8	534.4	12643.7	13060.4	12713.5	12767.1	12713.5	13006.8	534.38	14514.7	14599	14346.1	14450.4	14346.1	14494.6	534.4	13613.9	13771.8	12663.5	12723	12663.9	13711.9	534.37	15366.5	14943.6	14017.2	14069.1	14017.4	14891.4
534.3	14443.6	14941.2	14512.5	14512.5	14514	14939.7	534.35	12490	13077.2	12706.5	12761.4	12706.5	13022.3	534.33	14496.5	14629.2	14338.9	14446	14339	14522	534.35	14080.3	13860.7	12655.9	12716.9	12656.5	13799.1	534.32	15256.4	15026.7	14002	14055.3	14002.3	14973.1
534.25	14363.5	14952	14502.6	14502.6	14504.1	14950.5	534.3	12885	13096.9	12699.6	12755.9	12699.6	13040.6	534.28	14328.3	14665.9	14331.8	14441.7	14331.9	14555.9	534.3	13922.6	13954.8	12648	12710.7	12648.8	13891.3	534.27	14948.6	15117.1	13986.8	14041.5	13987.3	15061.9
534.2	14798.8	14964.3	14492.7	14492.7	14494.3	14962.8	534.25	13165.3	13119.4	12692.5	12750.2	12692.5	13061.7	534.23	14918.9	14710.4	14324.8	14437.7	14325	14597.3	534.25	13683.2	14054.5	12640.2	12704.5	12641.4	13989	534.22	15700	15214.9	13971.7	14027.9	13972.4	15158.1
534.15	14729.5	14977.7	14482.4	14482.4	14484	14976.1	534.2	13013.9	13145	12685.3	12744.5	12685.3	13085.9	534.18	14813.1	14762.7	14317.2	14433.2	14317.5	14646.4	534.2	14252.8	14159.7	12632.6	12698.6	12634.2	14092	534.17	15471.7	15319.9	13956.5	14014.2	13957.5	15261.1
534.1	14753	14992.9	14472.1	14472.1	14473.8	14991.2	534.15	13189.7	13174.3	12678.2	12738.8	12678.2	13113.7	534.13	15073.6	14824.3	14309.7	14428.9	14310.2	14704.6	534.15	14175.8	14269.8	12624.6	12692.4	12626.8	14199.6	534.12	16019.3	15432	13941.3	14000.6	13942.8	15371.2
534.05	14499.2	15009.9	14461.8	14461.8	14463.6	15008.1	534.1	13250.3	13207.6	12670.9	12733.2	12671	13145.3	534.08	15305	14895.8	14302	14424.5	14302.7	14772.6	534.1	14249.2	14385.1	12616.6	12686.4	12619.7	14312.2	534.07	16097.3	15551.2	13926	13987	13928.1	15488.1
534	14565.4	15029.1	14451.8	14451.8	14453.6	15027.3	534.05	13146.9	13245.1	12663.7	12727.5	12663.7	13181.2	534.03	15072.7	14978.1	14294	14420	14295.1	14851	534.05	14678.5	14505	12608.6	12680.3	12612.9	14429	534.02	15800.3	15677.1	13910.7	13973.4	13913.7	15611.5
533.95	14553.9	15050.6	14441.7	14441.7	14443.5	15048.7	534	13595	13287.3	12656.5	12722	12656.5	13221.8	533.98	14775	15072.5	14286.3	14415.9	14287.8	14941.3	534	14907.1	14629.2	12600.3	12674.1	12606.1	14549.6	533.97	15473.6	15809.9	13895.5	13960	13899.7	15741.2
533.9	14931.3	15074.4	14431.5	14431.5	14433.5	15072.5	533.95	13475.4	13334.3	12649	12716.4	12649.1	13266.9	533.93	15493	15179.5	14278.8	14412.2	14281	15043.8	533.95	14628.7	14757.4	12591.9	12667.8	12599.8	14673.6	533.92	15490.3	15948.6	13880.3	13946.7	13886.1	15876.4
533.85	14854.7	15100.5	14421	14421	14423	15098.4	533.9	13141.8	13386.6	12641.7	12710.9	12641.7	13317.4	533.88	15556.5	15298.7	14270.6	14408	14273.9	15158.1	533.9	14764.8	14889.5	12583.6	12661.7	12594.3	14800.8	533.87	16352.1	16093.2	13865.1	13933.5	13873.1	16016.8
533.8	14837.3	15129.4	14410.5	14410.5	14412.7	15127.3	533.85	13553.1	13444.6	12634.5	12705.6	12634.5	13373.4	533.83	15667.2	15431.1	14262.4	14403.9	14267	15285	533.85	15463.1	15025.2	12575.3	12655.7	12589.5	14930.5	533.82	15882	16242.8	13849.8	13920.2	13860.7	16161.4
533.75	14986.1	15161.6	14400.1	14400.1	14402.3	15159.3	533.8	13274.9	13508.3	12627	12700.1	12627.2	13435.1	533.78	15428.4	15576.8	14254.1	14399.9	14260.5	15424.5	533.8	15330.8	15163.3	12566.5	12649.3	12585.4	15061.5	533.77	16078.8	16397.2	13834.5	13907.1	13849.4	16309.7
533.7	15095.2	15197	14389.4	14389.4	14391.8	15194.7	533.75	13830	13578.3	12619.7	12695	12620	13502.9	533.73	16086.2	15736.3	14245.9	14396.2	14255	15576.9	533.75	15049.8	15304.1	12557.8	12643.1	12582.8	15193.8	533.72	16331.6	16556	13819.2	13894	13839.4	16460.9
533.65	14973.3	15236	14378.7	14378.7	14381.1	15233.5	533.7	14042.9	13654.2	12612.2	12689.6	12612.5	13576.5	533.68	16060.2	15907.9	14237.2	14392.2	14249.8	15740.2	533.7	15481.6	15447.4	12549.2	12637.3	12582.1	15326.5	533.67	16996.5	16718	13803.9	13881.1	13830.9	16613.7
533.6	15202.7	15279.1	14368	14368	14370.6	15276.5	533.65	13904.6	13736.4	12604.5	12684.2	12605.1	13656.3	533.63	15685.4	16091.9	14228.4	14388.4	14245.9	15914.4	533.65	15744.9	15592.2	12540.4	12631.2	12583.3	15458.6	533.62	16903	16882.9	13788.5	13868.1	13824.5	16767.2
533.55	15081.1	15326.4	14357.1	14357.1	14359.8	15323.7	533.6	14088.1	13825.2	12597	12679	12597.8	13742.4	533.58	16238.8	16287.7	14220	14385.2	14244	16098.6	533.6	15636.5	15738.7	12531.5	12625.1	12587	15589.5	533.57	16869.6	17050.2	13773	13855.3	13820.8	16920.3
533.5	14882.1	15378.6	14346.3	14346.3	14349.2	15375.7	533.55	13708.8	13920.4	12589.3	12673.8	12590.5	13834.6	533.53	16483.9	16493.5	14211.1	14381.7	14243.7	16290.2	533.55	15691.7	15886.4	12522.5	12619.3	12594	15718.2	533.52	17408.9	17219.5	13757.6	13842.6	13820.3	17071.8
533.45	15050.6	15436.2	14335.8	14335.8	14338.8	15433.1	533.5	13857.6	14022.3	12581.8	12668.9	12583.7	13933.3	533.48	16923.4	16708.2	14201.9	14378.2	14245.9	16487.9	533.5	15993.5	16035.1	12513.6	12613.5	12605	15843.8	533.47	17332	17390.5	13742.2	13830	13824	17220.8
533.4	14616.1	15499	14325	14325	14328.3	15495.7	533.45	13929	14130.4	12574.2	12664	12577.1	14037.7	533.43	16868.4	16929.8	14192.3	14374.6	14251.2	16688.6	533.45	16327.7	16184.7	12504.4	12607.7	12620.6	15965.3	533.42	17695.2	17562.4	13726.7	13817.6	13832.8	17365.5
533.35	14852.3	15568.2	14314.7	14314.7	14318.2	15564.7	533.4	14189.9	14244.6	12566.6	12659.2	12570.9	14147.7	533.38	17419.9	17157.4	14182.7	14371.3	14261	16890.4	533.4	16488.6	16335.2	12495.1	12601.9	12641.7	16081.8	533.37	17715.8	17735.3	13711.2	13805.2	13847.6	17504.8
533.3	15255	15643.4	14304.1	14304.1	14308	15639.5	533.35	14591.9	14364.6	12558.9	12654.5	12565.2	14262.7	533.33	17266.3	17388.5	14172.6	14367.9	14275.9	17089.9	533.35	16605.8	16487	12485.6	12596.1	12669.6	16192.5	533.32	17609.9	17909.4	13695.7	13793	13870	17637.6
533.25	14850.1	15724.7	14293.1	14293.1	14297.5	15720.2	533.3	14557.3	14490.1	12551	12649.7	12560.1	14382.2	533.28	17572.3	17622.1	14162.6	14364.9	14297.7	17284.8	533.3	16408.3	16640	12476	12590.5	12705.4	16296.2	533.27	17816.5	18084.8	13680.1	13781	13901.4	17762.6
533.2	15242.4	15813.4	14282.5	14282.5	14287.7	15808.1	533.25	14680.7	14621	12543.1	12645.1	12556.3	14505.7	533.23	17952.3	17856.6	14152.4	14362.1	14327.6	17471.6	533.25	16635.8	16795.1	12466.6	12585.2	12750.6	16392.5	533.22	17739.4	18262.1	13664.6	13769.2	13943.5	17878.6
533.15	15641.2	15908.4	14271.4	14271.5	14277.8	15902	533.2	14777.3	14756.5	12535.1	12640.6	12554.1	14632.1	533.18	18283.6	18089.8	14141.7	14359.3	14367.3	17646.6	533.2	16748.1	16952.6	12457	12580	12806.5	16480.2	533.17	18202.2	18441.8	13649.1	13757.7	13998.1	17984.2
533.1	15484.9	16009.8	14259.9	14260	14267.9	16001.8	533.15	15206.3	14896.5	12527.1	12636.2	12553.9	14760.5	533.13	18195.8	18320.9	14130.7	14356.7	14418.9	17806.8	533.15	16951.1	17113.3	12447.4	12575.1	12874.5	16558.5	533.12	18186.4	18624.9	13633.5	13746.3	14067.1	18078.5
533.05	15306.8	16118.2	14248.6	14248.7	14259	16107.6	533.1	14986.9	15040.3	12518.9	12631.9	12556.5	14889.8	533.08	18260.2	18549.7	14119.8	14354.8	14484.9	17949.7	533.1	17167.6	17278.4	12437.6	12570.4	12956.5	16626.8	533.07	18285	18812.7	13617.9	13735.2	14153	18160.3
533	15890.9	16233	14237.5	14237.6	14251.5	16218.8	533.05	15002.3	15187.9	12510.8	12627.9	12562.8	15018.7	533.03	18692.5	18775.8	14108.8	14353.4	14567.9	18072.2	533.05	17729.4	17448.3	12427.7	12565.9	13053.8	16684.1	533.02	19275.5	19006.7	13602.3	13724.5	14258	18228.7
532.95	15911.7	16352.8	14225.7	14225.9	14244.9	16333.3	533	14837.6	15338.9	12502.6	12624.1	12574	15146	532.98	18548.3	18999.3	14097.4	14352.4	14670.2	18171.7	533	17414.5	17624.4	12417.4	12561.5	13168.1	16729.7	532.97	19657	19208.7	13586.5	13714.1	14384.6	18283
532.9	16075.6	16477	14213.9	14214.2	14240.7	16449.8	532.95	15398.1	15492.8	12494.6	12620.8	12591.5	15269.8	532.93	18723.4	19221.2	14086.2	14352.5	14795	18246.1	532.95	17574.7	17808.3	12407.3	12557.9	13301.5	16763.6	532.92	19721.6	19420.2	13570.8	13704.2	14535.1	18322.4
532.85	16083.5	16604.2	14201.8	14202.4	14239.5	16565.8	532.9	15660.7	15649.2	12486.3	12617.5	12616.4	15387.9	532.88	19145.2	19442.9	14074.7	14353.5	14945.1	18293.8	532.9	17920.1	18001.1	12397.1	12554.8	13455.4	16785.1	532.87	19800.7	19643.5	13555	13694.9	14712.2	18346.3
532.8	15997.1	16732.8	14189.8	14190.7	14242.9	16678.8	532.85	15899.2	15808.2	12477.9	12614.6	12650.7	15498.7	532.83	19847.8	19666.2	14062.8	14355.5	15123.2	18313.2	532.85	18444.4	18204.3	12386.7	12552.5	13631.4	16793.9	532.82	20097.5	19880.8	13539.1	13686.4	14918.1	18354.5
532.75	16550.7	16861.2	14177.8	14179.3	14252.3	16785.2	532.8	16398.4	15970	12469.3	12612.1	12696.5	15600	532.78	20420.8	19893.5	14050.3	14358.5	15332	18303.5	532.8	18624.9	18418.6	12376	12550.9	13830.1	16789.6	532.77	20329.3	20134.2	13523.3	13679	15155	18346.7
532.7	16699.5	16986.8	14165.3	14167.5	14269.1	16880.8	532.75	15897.2	16135	12460.5	12610.1	12756.2	15689.7	532.73	20452.7	20128.3	14037.2	14363.3	15574.6	18264.8	532.75	18903.9	18645.7	12365.1	12550.6	14053	16772.3	532.72	20044.7	20406.1	13507.4	13673	15425.2	18322.8
532.65	17124.1	17108.3	14152.5	14155.9	14295.9	16961.6	532.7	16384	16304	12452	12609.2	12832.7	15766	532.68	20612.3	20374.1	14024	14370.8	15853.4	18198	532.7	19114.1	18886.6	12354.1	12552	14300.7	16742.1	532.67	20749.8	20698	13491.5	13668.8	15729.4	18282.9
532.6	17021.1	17224.4	14139.3	14144.3	14335.1	17023.5	532.65	16365.4	16477.6	12443.2	12609.3	12928.3	15826.5	532.63	20605.4	20634.9	14010.7	14381.7	16170.4	18104.1	532.65	19258.3	19142.4	12342.9	12555.6	14573.4	16699.2	532.62	21542.2	21011.6	13475.6	13666.8	16068.8	18227.2
532.55	17298.8	17335.3	14126.2	14133.6	14390.5	17063.7	532.6	16584.7	16657.6	12434.5	12610.8	13046	15869.8	532.58	21113.4	20914.6	13997.4	14397.3	16527	17984.9	532.6	19648.3	19414.2	12331.6	12562.2	14871.4	16643.9	532.57	21929.8	21348.4	13459.5	13667.9	16443.6	18156
532.5	16843	17441.7	14112.8	14123.6	14464.7	17078.9	532.55	16881.6	16845.8	12425.6	12614	13188.5	15894.4	532.53	21542.1	21216.7	13983.5	14418.4	16923.3	17842	532.55	19881.2	19701.5	12320.1	12572.4	15192.9	16576.5	532.52	22015.3	21709.4	13443.4	13673	16853.3	18069.9
532.45	16990.2	17547	14099.8	14115.6	14562.4	17068.6	532.5	17191.2	17044.5	12416.6	12619.6	13358.8	15899.3	532.48	21552.1	21545.4	13969.2	14446.8	17359.5	17677.6	532.5	19729.9	20005.2	12308.4	12587.6	15536.9	16497.6	532.47	21589.6	22095.7	13427.3	13683.5	17297.3	17969.6
532.4	17899.8	17654	14086.7	14109.6	14685.8	17031.9	532.45	17097.4	17256.1	12407.4	12628.3	13558.5	15884.2	532.43	21954.6	21903.6	13955	14484.9	17833.4	17495.4	532.45	20140.1	20325.4	12296.8	12609.4	15901.7	16408.1	532.42	22334	22506.6	13411.3	13700.9	17772.2	17856.1
532.35	17877.2	17767.1	14072.5	14105.3	14837.5	16969.3	532.4	17661.9	17483.7	12398.3	12641.1	13790	15849.3	532.38	22615.2	22294.4	13940.3	14534.9	18342.3	17297.7	532.4	20535.5	20661.5	12285	12639.1	16284.1	16308.2	532.37	23172.3	22941.9	13395.1	13727	18275	17730.1
532.3	17984.4	17893.2	14058.4	14105	15020.9	16884.2	532.35	18059.9	17730.2	12389	12659	14053.9	15795.2	532.33	22943.8	22719.9	13925	14600	18882.3	17087.5	532.35	20792.8	21013.4	12272.9	12679.1	16681.3	16198.8	532.32	23246.4	23400.8	13378.8	13764.3	18801.5	17592.7
532.25	17747.4	18038.5	14044.2	14109.8	15237.3	16779.8	532.3	17660.2	17998.4	12379.4	12683.6	14350.5	15723	532.28	22951.3	23182.3	13909.3	14684.4	19448.1	16868.4	532.3	21488.1	21379.9	12260.6	12732	17088.4	16080.8	532.27	24491.5	23882.3	13362.5	13816	19346.4	17445
532.2	17802	18209.2	14030.2	14121.8	15487.6	16660.2	532.25	18312.6	18291.6	12370	12717.2	14679.8	15634.7	532.23	23493.2	23684	13893.6	14793.3	20034.5	16643.5	532.25	21991.1	21760.3	12247.9	12800.6	17500.8	15954.8	532.22	25177.4	24385.3	13346.1	13885.6	19904	17287.9
532.15	18000	18409.5	14016.1	14142.9	15769.4	16529.4	532.2	19243.9	18610.8	12360.4	12761.6	15038.1	15531.8	532.18	23895.5	24224.2	13877.4	14931.5	20631.5	16416	532.2	22439.2	22154.4	12234.9	12889	17913.5	15821.7	532.17	25007.6	24907	13329.5	13977.4	20465.7	17123
532.1	18365.6	18642.7	14001.8	14175.7	16079.4	16391.2	532.15	18563.6	18957.6	12350.3	12819.7	15422.2	15416.2	532.13	24889	24804.1	13860.8	15105.8	21231.2	16188.6	532.15	22599.5	22561.8	12221.6	13001.6	18320.8	15682.6	532.12	25583.7	25446.6	13313	14096.7	21024.4	16951.6
532.05	18349.2	18910.2	13987	14223.6	16412	16248.7	532.1	18844	19333.4	12340.5	12895.6	15828	15290.7	532.08	25067	25423.6	13843.2	15323.3	21823.1	15963.5	532.1	23199.4	22983.3	12208.2	13143.8	18717.4	15538.4	532.07	26153.2	26002.8	13296.4	14249.4	21571.4	16774.8
532	18687.2	19212.2	13972.3	14291.3	16760	16105.6	532.05	19811.5	19737.5	12330.5	12993.1	16248.5	15157	532.03	25994.9	26083.9	13825.4	15593.4	22397.6	15743.8	532.05	23158.8	23418	12194.4	13320.9	19095.9	15390	532.02	26445.9	26574.5	13279.8	14442.4	22097.7	16593.9
531.95	19385.8	19546.9	13957.2	14383.8	17113.9	15963.6	532	20775.4	20169.7	12320.2	13117	16676.4	15016.5	531.98	26583.1	26786	13806.7	15925.3	22943.6	15530.5	532	23575.5	23868.2	12180.6	13539.9	19450.8	15238.7	531.97	26785.7	27162.4	13263	14683.6	22594.8	16410
531.9	19700.3	19909.9	13941.4	14506.7	17461.4	15824.5	531.95	20709.3	20627.5	12309.4	13272.8	17101.8	14871.6	531.93	27221.1	27529.5	13787.4	16329	23449.2	15326.2	531.95	23998.9	24335.2	12166.6	13807.6	19775.8	15085	531.92	27200	27765.5	13246.3	14980.8	23052.4	16224.8
531.85	20122.8	20298.5	13925.1	14667.9	17790.9	15690	531.9	20771.8	21110.7	12298.6	13467.7	17515.8	14724.3	531.88	27872.9	28317.1	13767.5	16816	23904.2	15132	531.9	25028.5	24822	12152.3	14131.7	20065	14929.7	531.87	27669.6	28385.9	13229.5	15343.3	23462.4	16039.1
531.8	20184.3	20709.2	13908.4	14875.8	18089.4	15560.7	531.85	21139.3	21617.9	12287.8	13709.2	17908.2	14576	531.83	28457.3	29151.4	13747	17398	24298.7	14948.8	531.85	24743.4	25332.1	12137.3	14520.5	20313	14773.3	531.82	28689.3	29026.2	13212.6	15780.7	23816.5	15854.1
531.75	20824.5	21140.2	13891.6	15140.8	18344.9	15437.7	531.8	22158.6	22148.3	12276.8	14005.3	18268.5	14428.1	531.78	29544.2	30035.9	13725.9	18086.9	24623.5	14777.2	531.8	26090.9	25869.6	12122.5	14982.1	20515	14617.5	531.77	28878.3	29689.8	13195.6	16302.6	24107.5	15670.8
531.7	21185.5	21591.2	13874.1	15473.6	18545.4	15320.4	531.75	22904.2	22702.6	12265.3	14365.6	18586.6	14281.1	531.73	30642.1	30975.6	13703.7	18895	24870.7	14617.2	531.75	26782.1	26438.9	12106.9	15524.2	20666.4	14462.1	531.72	30187.7	30382	13178.5	16919.5	24329.6	15490
531.65	21665.5	22064.2	13856.2	15886.1	18681.1	15209.4	531.7	23513.2	23281.1	12253.5	14799.1	18852.4	14136.7	531.68	32297.7	31972.9	13680.4	19831.3	25033.5	14468.9	531.7	26539.9	27046	12090.8	16155.1	20764.4	14308.1	531.67	30927.4	31106.1	13161.3	17638.9	24477	15312.8
531.6	21768.3	22565.5	13837.7	16391.5	18745.1	15104.3	531.65	24024.3	23887.6	12241.5	15316.5	19058.4	13995.6	531.63	33819.5	33033.9	13655.5	20906	25107.3	14331.6	531.65	27717	27697	12074.9	16882.7	20807.4	14156.7	531.62	31870.1	31868.4	13144	18469.5	24546.9	15140
531.55	23088.2	23105.5	13819.1	17004.4	18734.1	15005.3	531.6	24599.5	24526.8	12229.2	15928.6	19197.8	13858.7	531.58	34951	34163.7	13629.2	22127	25090	14205	531.6	28176.8	28397.7	12058.2	17713.3	20793.3	14007.5	531.57	33054.8	32674.4	13126.5	19418	24537.4	14972.1
531.5	23209.2	23696.5	13799.1	17737.7	18646.3	14910.7	531.55	24836.8	25205.2	12216.6	16645.9	19266.2	13726.4	531.53	35346.4	35367.4	13601.7	23500.2	24981.8	14088.8	531.55	29004.3	29151.7	12041.3	18649.9	20722.6	13861.7	531.52	33560.3	33529	13109	20488.9	24448.3	14809.7
531.45	24469.4	24357.7	13778.9	18608.1	18486	14821.5	531.5	25363.3	25932.2	12203.9	17479.8	19260.9	13599.3	531.48	36811.3	36650.8	13573.8	25030.4	24784.9	13983	531.5	29944.9	29963.7	12023.8	19695.7	20596.1	13719.4	531.47	34658	34437.3	13091.3	21685.8	24280.9	14653.2
531.4	24721.4	25106.1	13757.4	19626	18258.7	14736.1	531.45	26583.3	26715.2	12191	18437.6	19181.7	13478	531.43	38596.5	38011.1	13544.5	26711.3	24502.7	13886	531.45	30819.6	30836.3	12005.7	20850.9	20415.8	13580.9	531.42	35902.4	35399.2	13073.5	23004.2	24038.7	14503.3
531.35	26120.5	25964.7	13735.5	20805.9	17974.5	14655.3	531.4	27567.4	27565.1	12177.5	19527.8	19030.3	13362.1	531.38	39587.1	39448.7	13513.4	28538.3	24140.6	13796.6	531.4	32662.2	31770.2	11987.1	22112.8	20184.8	13446.6	531.37	37394.4	36415.8	13055.5	24440.8	23726	14360
531.3	27500.7	26953.4	13712.1	22156.8	17643.4	14577.4	531.35	28865.4	28492.5	12163.6	20756.6	18811.1	13252	531.33	40611.7	40959.9	13481.4	30501.3	23706.8	13714.6	531.35	32580.1	32764.3	11967.3	23476.6	19906.2	13316.1	531.32	37699.9	37484.1	13037.3	25986.4	23348.8	14223.5
531.25	28677.3	28091.8	13687.2	23686.3	17277.8	14502	531.3	29530.6	29507.4	12149.1	22127.7	18530.3	13147.5	531.28	42781.5	42536.7	13448.3	32584.2	23210.1	13639.1	531.3	34389.4	33812.9	11947.6	24930.6	19586.6	13190.9	531.27	38589.3	38598	13019.1	27627.8	22914.3	14094.2
531.2	29971	29398.3	13660.9	25400.8	16890.3	14429.1	531.25	30593.1	30620.1	12134.2	23644.1	18195.5	13049	531.23	44533.3	44167.5	13413.1	34767.1	22658.6	13568.1	531.25	35062.2	34908.4	11926.7	26462.2	19229.7	13069.9	531.22	40287	39749.2	13000.8	29349.3	22429.8	13971.8
531.15	31203.6	30881.1	13633.3	27295.2	16494.2	14358.3	531.2	31864	31833.8	12118.9	25298.9	17816.6	12956.2	531.18	46344.2	45831.5	13376.3	37018	22064.7	13501.4	531.2	35854.2	36040.4	11905.4	28055.2	18842.2	12953.9	531.17	42003.1	40920.9	12982.2	31124	21905	13856.4
531.1	32303.1	32547	13604.3	29365.8	16100.4	14289.3	531.15	33378.1	33153.1	12103	27087.2	17403	12868.9	531.13	47369.5	47508.6	13337.6	39307.4	21438.6	13437.9	531.15	37265.4	37194.6	11883.6	29688.9	18430	12842.9	531.12	43433.6	42096.8	12963.4	32927.5	21348.4	13747.8
531.05	34493	34394.2	13574	31601.1	15719.1	14222	531.1	34948.8	34576.8	12086.5	28997.8	16965.2	12786.8	531.08	49217.5	49173	13297.9	41599.1	20792	13377.8	531.1	38854.3	38354.1	11860.9	31341	17998.7	12736.4	531.07	42723.6	43255.6	12944.5	34729.4	20769.2	13645.9
531	36374.2	36411.1	13541.4	33981.7	15357.1	14155	531.05	36475.8	36099.3	12069.2	31014.9	16513.2	12709.5	531.03	50829	50792.8	13256.4	43851.3	20134.8	13319.6	531.05	40368	39495.2	11837.2	32980.2	17555.1	12634.3	531.02	43619.4	44372.7	12925.6	36496.4	20176.7	13550.8
530.95	39051.8	38581.8	13506.7	36486.6	15020.2	14088.3	531	38059.3	37711.9	12051.2	33120.9	16056.5	12636.8	530.98	52359.1	52335.1	13213.3	46022.5	19476.3	13263	531	40597.9	40595.8	11812.6	34579.2	17105	12536.7	530.97	45378.6	45421.8	12906.6	38194.4	19578.7	13461.9
530.9	41369.7	40872.5	13469	39077.5	14712	14021	530.95	39872.1	39394.4	12032.5	35285.6	15605.2	12568.5	530.93	54561.4	53758.4	13168.7	48061	18827.4	13207.5	530.95	41766.5	41630.8	11787.8	36107.4	16654.8	12444.1	530.92	45998.1	46370.5	12887.4	39781.7	18984.5	13379
530.85	43635.1	43250.5	13428.8	41720.4	14434.5	13953.2	530.9	41524.5	41126.9	12013	37482.2	15166.6	12504	530.88	55161	55024.2	13122	49921.6	18194.5	13152	530.9	42351	42572.5	11762.3	37532	16209.2	12355.8	530.87	47185.5	47190	12868	41223.1	18401.1	13301.9
530.8	44884.7	45672.6	13386.1	44372.3	14187.8	13884.8	530.85	42162.9	42882.6	11992.7	39677.3	14747.4	12443.2	530.83	55487.2	56093.9	13074.6	51559.3	17586.2	13097.7	530.85	43160.6	43394.4	11736.4	38822.3	15772.9	12271.9	530.82	48102.7	47850.1	12848.6	42482.4	17834.7	13230.2
530.75	47327	48091.1	13342	46986.7	13971.8	13816.7	530.8	44503.7	44630.4	11972.1	41835.2	14353.2	12386.1	530.78	56056.2	56929.1	13026.9	52930.3	17008	13044.6	530.8	43768.8	44067	11710	39943.9	15350.7	12192.3	530.77	48032.8	48322.3	12829	43525.8	17291	13163.5
530.7	49769.8	50454.2	13295.2	49514.6	13782.6	13747.4	530.75	46628.7	46336.1	11950.4	43918.5	13986.8	12331.7	530.73	57452.3	57494.6	12978.5	53996.2	16463.6	12992	530.75	43971.9	44565.7	11683.1	40869.7	14945.7	12116.7	530.72	48266.4	48581.7	12809.4	44324.9	16774.1	13101.6
530.65	52292	52700	13245.8	51896.7	13617.8	13677	530.7	47196.1	47957.2	11927.8	45881.7	13651.5	12279.7	530.68	57395.2	57758.4	12928.8	54721	15956.1	12939	530.7	44275.7	44868.3	11656.2	41574.5	14561	12045.1	530.67	48338	48607.1	12789.8	44854	16288.5	13044.2
530.6	54166.4	54775.3	13193.5	54083.6	13473.5	13605.1	530.65	49404.1	49456.9	11905	47687.6	13348.7	12230.5	530.63	57031.1	57700.6	12879.1	55083.9	15488.2	12886.7	530.65	44749.8	44956.2	11629	42038.2	14198.7	11977.4	530.62	48307.8	48384.8	12770.1	45097.9	15836.2	12990.9
530.55	55592.4	56626.4	13139.1	56025	13347.2	13532.5	530.6	50218.8	50794.2	11881.1	49295.5	13077.7	12183.1	530.58	58103.2	57309.2	12829.7	55072.6	15060.8	12835.4	530.6	44608.9	44816.2	11601.6	42246.6	13859.7	11913.1	530.57	47951.9	47907.8	12750.5	45048.7	15418.7	12941.5
530.5	56896.9	58203.1	13083.2	57674.3	13235.9	13459.3	530.55	50632.7	51931.3	11856.8	50668.8	12838.4	12137.8	530.53	57660.9	56581.2	12779.2	54684.2	14672	12783.4	530.55	44623.5	44442.8	11574.2	42192.7	13546.1	11852.3	530.52	47075.4	47177.5	12730.9	44707.1	15036.7	12895.6
530.45	58520.6	59462.1	13025.8	58991.4	13136.5	13385.7	530.5	53115.7	52833.7	11832.4	51775.1	12628.9	12094.5	530.48	55070	55525.8	12729.1	53929.8	14322.1	12732.2	530.5	44483.4	43836.6	11546.7	41877.7	13257.6	11794.9	530.47	45544.4	46202.1	12711.5	44082.3	14689.8	12852.9
530.4	60044.1	60362.8	12966.5	59938.5	13046.1	13311.2	530.45	54046.4	53467.5	11806.8	52582.5	12446.5	12052.1	530.43	53701.4	54167.5	12681.5	52834.9	14011.8	12683.7	530.45	43611.2	43005.8	11519.4	41309.9	12994.2	11740.5	530.42	45001.3	45000.7	12692.2	43193.7	14378.1	12813.3
530.35	60088.5	60879.1	12905.5	60491.9	12962.3	13236	530.4	53658.1	53810.4	11780.8	53071.6	12289.2	12011	530.38	52985.7	52532.3	12635.1	51428.3	13737.4	12636.7	530.4	41805.9	41965.2	11492.5	40505.3	12755.6	11689.4	530.37	44353.3	43595.5	12673	42065.4	14099.7	12776.3
530.3	60903.6	60994.7	12844.5	60637.3	12884.8	13161.5	530.35	53206	53846.2	11754.9	53229.5	12154.9	11971.6	530.33	50843.8	50655.2	12589.3	49747.8	13495.6	12590.5	530.35	40323.7	40734.1	11466.8	39484.4	12541.4	11641.9	530.32	42172.8	42015	12653.8	40728.1	13852.8	12741.8
530.25	60397	60701.8	12782.5	60368.8	12811.1	13086.8	530.3	53223.4	53567.2	11729.2	53051.3	12040.5	11933.8	530.28	48559.1	48577.8	12545.6	47837.8	13284.8	12546.4	530.3	39090.7	39339.8	11442	38275.5	12350.5	11597.8	530.27	40377.2	40291.2	12635	39216.1	13635.5	12709.5
530.2	61110.3	60004.8	12720.9	59691.9	12741.4	13013.3	530.25	52347.1	52973.3	11703.6	52539.9	11943.2	11897.2	530.23	46279.9	46340.8	12504	45742.1	13102.1	12504.6	530.25	37164.5	37808.8	11417.9	36907	12181.1	11556.5	530.22	38766.7	38456.1	12616.4	37564.1	13445.4	12679.4
530.15	59614.9	58918.8	12658.5	58622.8	12673.4	12939.6	530.2	51418.6	52076.4	11678.3	51710	11861	11862	530.18	43995.3	43993.7	12464.6	43513.1	12944.8	12465	530.2	36404.9	36171.1	11395	35410.9	12031.9	11518.3	530.17	36358.8	36548.8	12598	35813.5	13280.2	12651
530.1	58932.7	57470.3	12597.7	57188.8	12608.7	12868.1	530.15	51230	50894.5	11653.4	50581.9	11791.2	11828.2	530.13	41776.9	41577.8	12427.3	41195	12809.9	12427.6	530.15	34695.2	34456.6	11372.5	33818.7	11900.7	11482.4	530.12	34051.1	34601.7	12579.9	33999.7	13137.4	12624.4
530.05	56596.9	55692.2	12537.5	55423.4	12546	12797.9	530.1	50032.3	49452.7	11628.6	49183.1	11731.4	11795.3	530.08	39048.9	39135.2	12392.1	38832.6	12694.5	12392.3	530.1	32957.9	32694.2	11351.1	32161.3	11786.1	11449	530.07	32435.5	32647.8	12562.1	32158.1	13014.5	12599.3
530	54404.3	53627.4	12479.9	53370	12486.5	12730.6	530.05	48553.9	47782.5	11604.3	47547.2	11680.2	11763.5	530.03	36499	36705.4	12359.5	36468.1	12596.6	12359.6	530.05	30970.8	30917.2	11330.8	30473.7	11686.8	11418.1	530.02	30650.7	30717.4	12544.5	30321.8	12909.1	12575.5
529.95	52272.6	51319.8	12424.5	51072.6	12429.9	12666.2	530	46462.3	45917.1	11580.6	45709.2	11636.1	11733.1	529.98	34365.3	34321.1	12329.3	34136.5	12513.8	12329.4	530	29250.6	29150.9	11311.6	28783.2	11601.2	11389.8	529.97	28821.1	28835.6	12527.1	28518.1	12818.8	12552.9
529.9	49775.9	48825.4	12371.3	48587.6	12375.9	12604.5	529.95	44126.2	43899.6	11557.9	43713.3	11598.1	11704.1	529.93	32305.4	32018.6	12301.1	31876.1	12443.5	12301.2	529.95	27531.4	27420.1	11293.5	27116.1	11527.5	11363.6	529.92	26165.5	27030.6	12510	26777.4	12741.8	12531.4
529.85	46922.8	46194.6	12320.9	45965.6	12324.9	12545.9	529.9	41809.7	41767.4	11536.3	41598.3	11565	11676.7	529.88	29528.7	29821.1	12274.9	29712	12384	12275	529.9	26263.5	25746.5	11276.5	25495.6	11464.4	11339.5	529.87	25085	25319.6	12493.2	25119	12676.1	12510.9
529.8	43350.8	43480.5	12273.4	43259.6	12277	12490.7	529.85	39985.3	39560.1	11515.6	39404.6	11536	11650.7	529.83	27654	27750.5	12251.4	27667.6	12334.2	12251.4	529.85	24118.9	24146.2	11260.2	23939.6	11410	11317	529.82	23573.2	23717.6	12476.6	23559.7	12619.9	12491.1
529.75	40570.6	40734.6	12229.8	40521.3	12233.1	12439.7	529.8	37739.7	37315.5	11495.8	37171.2	11510.1	11625.9	529.78	25439	25821.6	12229.6	25759.1	12292.1	12229.6	529.8	22335.8	22638.5	11245.3	22468.5	11364	11296.7	529.77	22525.8	22235.4	12460.1	22111.9	12571.7	12472
529.7	38836.7	38000.3	12189.1	37794.3	12192.2	12392	529.75	35310.2	35067.5	11477	34932.2	11486.9	11602.4	529.73	23800.3	24043.5	12209.9	23996.8	12256.6	12209.9	529.75	20993.8	21232.5	11231.5	21092.4	11324.9	11278.1	529.72	21005.6	20878.3	12443.8	20782.4	12530	12453.5
529.65	35454.3	35326.2	12150.2	35127	12153.1	12346.5	529.7	33147.1	32854.7	11459.3	32726.8	11466.1	11580.3	529.68	21705.4	22426	12191.8	22391.3	12226.4	12191.8	529.7	19726.7	19935.6	11218.4	19820	11291.5	11261	529.67	19354.4	19652.5	12427.7	19578.4	12493.9	12435.6
529.6	32157.9	32748	12115	32555.3	12117.7	12304.9	529.65	30599.4	30703.4	11442.5	30581.8	11447.1	11559.5	529.63	20686.4	20968.8	12175.6	20943.2	12201.2	12175.6	529.65	18400.7	18752.1	11206.2	18656.3	11263	11245.1	529.62	18780.2	18555.8	12411.8	18498.9	12462.2	12418.2
529.55	29525.6	30296.8	12083.3	30110.3	12085.9	12267.2	529.6	28941	28638.9	11426.9	28522.8	11430	11540	529.58	19552.9	19668.8	12160.5	19650.1	12179.1	12160.5	529.6	17568.6	17682.2	11194.7	17602.4	11238.6	11230.5	529.57	17591.7	17584.7	12396	17541.3	12434.1	12401.2
529.5	27384.9	27996.5	12054.4	27816	12056.9	12232.5	529.55	26639.2	26681.5	11412	26570	11414.1	11521.5	529.53	18450.8	18520.8	12146.4	18507.3	12159.9	12146.4	529.55	17335.9	16726.7	11183.8	16659.9	11217.4	11216.9	529.52	16599.4	16733.6	12380.3	16700.7	12409	12384.5
529.45	25581.5	25862.2	12027.8	25687.3	12030.2	12200.4	529.5	24671.8	24845.2	11398.2	24737.9	11399.5	11504.1	529.48	17413.3	17515.8	12133.3	17506	12143	12133.3	529.5	15905	15880.3	11173	15823.9	11198.6	11203.7	529.47	16508.1	15994.1	12364.7	15969.3	12386.1	12368.1
529.4	23653.2	23910.3	12003.2	23740.7	12005.4	12170.5	529.45	23161.1	23145.7	11385.2	23042.2	11386.1	11487.9	529.43	16735.2	16646.3	12121.2	16639.4	12128.2	12121.2	529.45	14917.6	15138.4	11163	15090.3	11182.5	11191.7	529.42	15329.5	15359	12349.2	15340.4	12365	12351.9
529.35	22284.3	22144.1	11980.5	21979.7	11982.7	12142.8	529.4	21439.5	21587.5	11372.9	21487.4	11373.5	11472.4	529.38	16304.8	15899.7	12109.8	15894.8	12114.7	12109.8	529.4	14076.6	14494	11153.7	14452.5	11168.4	11180.6	529.37	14431.5	14817.8	12333.8	14804	12345.5	12336
529.3	20222.6	20563.6	11959.4	20404.1	11961.5	12116.9	529.35	20001.7	20173.9	11361.4	20076.9	11361.7	11457.9	529.33	15386.6	15264	12098.8	15260.5	12102.2	12098.8	529.35	13717.8	13938.5	11144.9	13902.2	11155.9	11170.2	529.32	14104.4	14360.5	12318.5	14350.3	12327.1	12320.3
529.25	19202.7	19165.7	11940.5	19010.8	11942.4	12093.3	529.3	19225.7	18904	11350.5	18810.1	11350.7	11444.2	529.28	14838.6	14727.5	12088.6	14725.1	12091	12088.6	529.3	13232	13464.7	11136.3	13432.7	11144.5	11160.2	529.27	14080	13977.1	12303.3	13969.6	12309.5	12304.7
529.2	17783.3	17940.3	11922.6	17789.9	11924.5	12071.1	529.25	17821.3	17773.1	11339.9	17681.9	11340.1	11430.9	529.23	14392.1	14277.7	12079	14276.1	12080.6	12079	529.25	13207.6	13063.5	11128	13034.8	11134	11150.7	529.22	13393	13657.7	12288.1	13652.1	12292.5	12289.1
529.15	17034.5	16880.3	11906.2	16734.3	11908.1	12050.5	529.2	16574.9	16778	11330	16689.5	11330.1	11418.4	529.18	14212.2	13904.1	12069.7	13902.9	12070.9	12069.7	529.2	12652.3	12726	11119.8	12700.1	11124.1	11141.4	529.17	12886.2	13393.8	12272.9	13389.7	12276.1	12273.8
529.1	16438.9	15971.2	11890.7	15829.3	11892.5	12030.9	529.15	15609.4	15909.4	11320.6	15823.4	11320.7	11406.6	529.13	13802.4	13595.1	12060.7	13594.3	12061.5	12060.7	529.15	12492.9	12444.6	11111.8	12420.8	11115	11132.4	529.12	13345.5	13176.7	12257.9	13173.7	12260.1	12258.5
529.05	15562.2	15199	11875.8	15061	11877.5	12012.1	529.1	14701.1	15157.9	11311.7	15074.3	11311.7	11395.3	529.08	13854.2	13341.1	12052	13340.6	12052.5	12052	529.1	12486.7	12211	11104	12188.9	11106.3	11123.7	529.07	13157	12998.7	12242.7	12996.5	12244.3	12243.2
529	14532	14549.8	11861.8	14415.6	11863.4	11994.4	529.05	14468.8	14513.3	11303.2	14432	11303.2	11384.5	529.03	13346	13133	12043.3	13132.6	12043.6	12043.3	529.05	11940.8	12018.4	11096.1	11997.8	11097.8	11115.1	529.02	12885.2	12853.1	12227.6	12851.6	12228.7	12228
528.95	14167.8	14008.8	11848.9	13878.2	11850.5	11977.9	529	13872.6	13964.2	11294.8	13885.1	11294.8	11373.9	528.98	13140.9	12963.2	12035	12963	12035.3	12035	529	11969.7	11860.6	11088.6	11841.2	11089.8	11106.9	528.97	12552.7	12734	12212.5	12732.9	12213.3	12212.8
528.9	14035.4	13562.5	11836.4	13435.4	11837.9	11962	528.95	13958.3	13501.4	11286.6	13424.4	11286.6	11363.6	528.93	12941.5	12825.1	12027	12825	12027.1	12027	528.95	11944.7	11731.5	11081	11713	11081.9	11098.7	528.92	12934.2	12636.7	12197.5	12635.9	12198	12197.7
528.85	13823.2	13196.9	11824	13073.2	11825.5	11946.3	528.9	12890.9	13113.5	11278.4	13038.5	11278.4	11353.4	528.88	12289.3	12712.7	12019.1	12712.6	12019.2	12019.1	528.9	11701.2	11626.1	11073.5	11608.4	11074.1	11090.6	528.87	12822.6	12556.6	12182.4	12556	12182.7	12182.5
528.8	13202.4	12899.8	11811.8	12779.2	11813.2	11930.9	528.85	12670.9	12791.1	11270.7	12718.1	11270.7	11343.7	528.83	12630.8	12621.4	12011.8	12621.3	12011.9	12011.8	528.85	11366.1	11540.1	11066.1	11523.1	11066.5	11082.7	528.82	12534.3	12490.2	12167.3	12489.8	12167.5	12167.4
528.75	12949.4	12660.5	11800.3	12543.1	11801.7	11916.4	528.8	12320.8	12524.7	11263	12453.5	11263	11334.2	528.78	12627.6	12546.1	12004.2	12546.1	12004.3	12004.2	528.8	11412.1	11470.1	11058.9	11453.7	11059.2	11075	528.77	12800.6	12434.7	12152.2	12434.5	12152.4	12152.4
528.7	12896.8	12468.6	11789.1	12354.2	11790.4	11902.2	528.75	12048.5	12305.5	11255.6	12236.1	11255.6	11324.9	528.73	12580.2	12483.8	11996.6	12483.8	11996.7	11996.6	528.75	11291.9	11412.6	11051.7	11396.7	11051.9	11067.3	528.72	12162.3	12387.6	12137.1	12387.4	12137.3	12137.2
528.65	12601.6	12315.9	11777.9	12204.3	11779.2	11888.2	528.7	12084.9	12126.5	11248.2	12058.9	11248.2	11315.8	528.68	12907.1	12431.9	11989.1	12431.9	11989.1	11989.1	528.7	11697	11365.1	11044.5	11349.8	11044.7	11059.8	528.67	12381.4	12347.2	12122.1	12347.1	12122.2	12122.2
528.6	12777.1	12194.8	11767	12086	11768.2	11874.5	528.65	12198.3	11980.6	11240.8	11914.6	11240.8	11306.8	528.63	12317.9	12387.7	11981.2	12387.7	11981.2	11981.2	528.65	11469	11325.4	11037.1	11310.5	11037.2	11052	528.62	12787.4	12311.8	12107.1	12311.7	12107.2	12107.2
528.55	12262.5	12098.6	11755.9	11992.5	11757.1	11860.8	528.6	11908.5	11861.9	11233.4	11797.5	11233.4	11297.7	528.58	12145.5	12350.3	11973.9	12350.3	11973.9	11973.9	528.6	11487.7	11292	11029.9	11277.5	11030	11044.3	528.57	11886.8	12280.3	12092	12280.2	12092.1	12092.1
528.5	12353.2	12022.8	11745.4	11919.3	11746.5	11847.7	528.55	11677.8	11765.5	11226.1	11702.7	11226.1	11288.9	528.53	12392.4	12318	11966.7	12318	11966.7	11966.7	528.55	10989.2	11263.4	11022.6	11249.3	11022.6	11036.7	528.52	12378.5	12251.8	12077	12251.7	12077.1	12077.1
528.45	12465.1	11962.5	11734.7	11861.4	11735.8	11834.6	528.5	11922.9	11687.1	11218.9	11625.8	11218.9	11280.2	528.48	12027.2	12289.3	11959.3	12289.3	11959.3	11959.3	528.5	11071.4	11238.9	11015.6	11225.1	11015.6	11029.4	528.47	12450.7	12225.5	12062	12225.5	12062	12062
528.4	11876.9	11914.1	11723.9	11815.5	11725	11821.5	528.45	11865.9	11623.1	11211.6	11563.2	11211.6	11271.4	528.43	12765.4	12263.9	11952.2	12263.9	11952.2	11952.2	528.45	11261.5	11217.3	11008.6	11203.8	11008.6	11022	528.42	11814.4	12200.9	12047	12200.9	12047	12047
528.35	11853.3	11875.7	11713.7	11779.3	11714.8	11809	528.4	11374.8	11570.5	11204.3	11512	11204.3	11262.7	528.38	12710.3	12240.1	11944.5	12240.1	11944.5	11944.5	528.4	11321.8	11197.8	11001.4	11184.7	11001.4	11014.6	528.37	12031.1	12177.8	12032	12177.7	12032	12032
528.3	11628.9	11844.3	11703.6	11750.2	11704.6	11796.7	528.35	11307.5	11527.2	11197.2	11470.1	11197.2	11254.3	528.33	12367.8	12218.1	11936.7	12218.1	11936.7	11936.7	528.35	11025.1	11180	10994.2	11167.2	10994.2	11007.1	528.32	12036.5	12155.6	12017	12155.6	12017	12017
528.25	12289.5	11818.4	11693.7	11726.5	11694.7	11784.6	528.3	10870.2	11491	11190.1	11435.2	11190.1	11246	528.28	12275.8	12198	11929.3	12198	11929.3	11929.3	528.3	11371.3	11163.8	10987.2	11151.3	10987.2	10999.8	528.27	12148.3	12134.2	12002	12134.2	12002	12002
528.2	12079.4	11795.8	11683	11705.9	11684	11771.9	528.25	11653.9	11460.5	11183.3	11405.9	11183.3	11237.8	528.23	12597.5	12179.1	11922	12179.1	11922	11922	528.25	11351.4	11148.5	10980	11136.2	10980	10992.3	528.22	12368.1	12113.4	11987	12113.4	11987	11987
528.15	11869	11776.3	11672.6	11688.4	11673.5	11759.5	528.2	11151.9	11433.9	11176.1	11380.6	11176.1	11229.4	528.18	12215.4	12160.9	11914.3	12160.9	11914.3	11914.3	528.2	11041.2	11134	10972.8	11121.9	10972.8	10984.8	528.17	11854.4	12093.1	11971.9	12093.1	11971.9	11971.9
528.1	11726	11759.1	11662.4	11673.2	11663.3	11747.4	528.15	11371.9	11410.9	11169.1	11358.8	11169.1	11221.2	528.13	12077.1	12143.9	11907	12143.9	11907	11907	528.15	11063	11120.3	10965.7	11108.5	10965.7	10977.5	528.12	11924.2	12073.3	11956.9	12073.3	11956.9	11956.9
528.05	11579.4	11743.7	11652.3	11659.7	11653.2	11735.5	528.1	11522	11390.3	11162	11339.3	11162	11213	528.08	12384.6	12127.6	11899.9	12127.6	11899.9	11899.9	528.1	11107.8	11107.2	10958.6	11095.7	10958.6	10970.2	528.07	12255.4	12053.9	11941.9	12053.9	11941.9	11941.9
528	11465.4	11729.6	11642.4	11647.4	11643.2	11723.7	528.05	11685.7	11371.7	11154.8	11321.8	11154.8	11204.8	528.03	12169.7	12111.6	11892.4	12111.6	11892.4	11892.4	528.05	10807.1	11094.6	10951.5	11083.2	10951.5	10962.9	528.02	11919.9	12034.7	11926.9	12034.7	11926.9	11926.9
527.95	11788.9	11716.4	11632.6	11635.9	11633.4	11712.2	528	11222	11354.5	11147.6	11305.6	11147.6	11196.5	527.98	12176.8	12096.4	11885.1	12096.4	11885.1	11885.1	528	11247.6	11082.5	10944.6	11071.4	10944.6	10955.7	527.97	11947.4	12015.7	11911.9	12015.7	11911.9	11911.9
527.9	11949	11703.4	11622.4	11624.6	11623.2	11700.3	527.95	11584.1	11338.6	11140.6	11290.8	11140.6	11188.4	527.93	12046.1	12081.6	11877.9	12081.6	11877.9	11877.9	527.95	11064	11070.4	10937.5	11059.5	10937.5	10948.3	527.92	12050.9	11997	11896.9	11997	11896.9	11896.9
527.85	11710.3	11690.6	11612.1	11613.5	11612.9	11688.4	527.9	11495.8	11323.6	11133.4	11276.8	11133.4	11180.2	527.88	12133	12067.4	11870.7	12067.4	11870.7	11870.7	527.9	11000.7	11058.8	10930.4	11048.1	10930.4	10941	527.87	12323.5	11978.5	11881.9	11978.5	11881.9	11881.9
527.8	11857.2	11678.4	11602	11602.9	11602.7	11676.7	527.85	11320.5	11309.3	11126.2	11263.5	11126.2	11172	527.83	12033.3	12053.4	11863.4	12053.4	11863.4	11863.4	527.85	11025.8	11047.4	10923.3	11037	10923.3	10933.8	527.82	11683.1	11960.2	11866.8	11960.2	11866.8	11866.8
527.75	11517.4	11666.2	11591.7	11592.3	11592.4	11664.8	527.8	11391.2	11295.7	11119.1	11250.8	11119.1	11164	527.78	12184	12039.8	11856.3	12039.8	11856.3	11856.3	527.8	10956.3	11036.3	10916.3	11026	10916.3	10926.5	527.77	11826.4	11942.1	11851.8	11942.1	11851.8	11851.8
527.7	11674.7	11654.5	11581.8	11582.1	11582.5	11653.4	527.75	11273.3	11282.6	11112	11238.6	11112	11156	527.73	12440.9	12026.5	11849	12026.5	11849	11849	527.75	11369.2	11025.4	10909.2	11015.3	10909.2	10919.3	527.72	11600	11924.1	11836.8	11924.1	11836.8	11836.8
527.65	11244.4	11642.9	11571.7	11571.9	11572.4	11641.9	527.7	10988.4	11269.9	11104.9	11226.8	11104.9	11148	527.68	12157.8	12013.1	11841.4	12013.1	11841.4	11841.4	527.7	10993.7	11014.4	10902	11004.5	10902	10911.8	527.67	12087.6	11906.3	11821.9	11906.3	11821.9	11821.9
527.6	11567.8	11631.7	11562	11562.2	11562.7	11630.8	527.65	11330.8	11257.7	11098	11215.5	11098	11140.2	527.63	12017.2	12000.3	11834.1	12000.3	11834.1	11834.1	527.65	10970.1	11003.9	10894.9	10994.2	10894.9	10904.6	527.62	11908.7	11888.6	11806.8	11888.6	11806.8	11806.8
527.55	11441.2	11620.2	11552	11552.1	11552.7	11619.5	527.6	10917	11245.6	11090.9	11204.2	11090.9	11132.3	527.58	12058	11987.9	11826.9	11987.9	11826.9	11826.9	527.6	10864.7	10993.5	10887.9	10984	10887.9	10897.4	527.57	12112.6	11871	11791.8	11871	11791.8	11791.8
527.5	11629.1	11609	11542.1	11542.2	11542.8	11608.3	527.55	10334.7	11234	11084	11193.4	11084	11124.5	527.53	12288.5	11975.7	11819.7	11975.7	11819.7	11819.7	527.55	10963.4	10983.3	10880.9	10974	10880.9	10890.2	527.52	11922.5	11853.5	11776.8	11853.5	11776.8	11776.8
527.45	11828.1	11597.6	11532	11532.1	11532.7	11596.9	527.5	10806.4	11222.9	11077.3	11183.1	11077.3	11117.1	527.48	12259.4	11963.5	11812.2	11963.5	11812.2	11812.2	527.5	10979.9	10973.2	10873.8	10964	10873.8	10883	527.47	11672.1	11836.1	11761.8	11836.1	11761.8	11761.8
527.4	11474.5	11586	11521.7	11521.7	11522.3	11585.3	527.45	11033.1	11211.8	11070.4	11172.7	11070.4	11109.5	527.43	11970.3	11951.5	11804.8	11951.5	11804.8	11804.8	527.45	11320.6	10963.2	10866.8	10954.2	10866.8	10875.8	527.42	11872.3	11818.9	11746.8	11818.9	11746.8	11746.8
527.35	11694	11574.8	11511.8	11511.8	11512.4	11574.2	527.4	11044.2	11200.8	11063.4	11162.5	11063.4	11101.7	527.38	11734.4	11940	11797.7	11940	11797.7	11797.7	527.4	11250.5	10953.2	10859.5	10944.3	10859.5	10868.3	527.37	12165.3	11801.8	11731.8	11801.8	11731.8	11731.8
527.3	11449.9	11563.4	11501.6	11501.6	11502.2	11562.8	527.35	10756.9	11189.9	11056.4	11152.3	11056.4	11094	527.33	11970.8	11928.9	11790.7	11928.9	11790.7	11790.7	527.35	10534.4	10943.3	10852.2	10934.6	10852.2	10860.9	527.32	11981.4	11784.7	11716.7	11784.7	11716.7	11716.7
527.25	11548.1	11552.3	11491.6	11491.6	11492.2	11551.7	527.3	10698	11179.4	11049.6	11142.5	11049.6	11086.4	527.28	11976.4	11917.8	11783.5	11917.8	11783.5	11783.5	527.3	10750.3	10933.9	10845.4	10925.4	10845.4	10854	527.27	11970.3	11767.7	11701.7	11767.7	11701.7	11701.7
527.2	11298.4	11541.1	11481.6	11481.6	11482.1	11540.5	527.25	11147.8	11169	11042.7	11132.8	11042.7	11078.9	527.23	11489.3	11906.7	11776.4	11906.7	11776.4	11776.4	527.25	10574.7	10924.5	10838.5	10916.1	10838.5	10846.9	527.22	12424.4	11750.8	11686.6	11750.8	11686.6	11686.6
527.15	11717.5	11530.2	11471.8	11471.8	11472.3	11529.6	527.2	11036	11158.5	11035.7	11123	11035.7	11071.2	527.18	11451.2	11896.4	11769.6	11896.4	11769.6	11769.6	527.2	11145.8	10915.4	10831.6	10907.1	10831.6	10839.9	527.17	12042.1	11733.9	11671.5	11733.9	11671.5	11671.5
527.1	11256.3	11518.9	11461.5	11461.5	11462	11518.3	527.15	10936.4	11148.3	11028.7	11113.4	11028.7	11063.6	527.13	11635.8	11886.2	11762.9	11886.2	11762.9	11762.9	527.15	11242.2	10905.9	10824.5	10897.8	10824.5	10832.6	527.12	12133.9	11717.1	11656.5	11717.1	11656.5	11656.5
527.05	11281.1	11508.1	11451.7	11451.7	11452.2	11507.5	527.1	11061.1	11138.2	11021.7	11104	11021.7	11056	527.08	11924.5	11875.9	11756.1	11875.9	11756.1	11756.1	527.1	10601.5	10896.5	10817.2	10888.5	10817.2	10825.2	527.07	11866.3	11700.4	11641.4	11700.4	11641.4	11641.4
527	11441.9	11497.2	11441.9	11441.9	11442.4	11496.7	527.05	11014.7	11128.2	11014.7	11094.6	11014.7	11048.3	527.03	11748.9	11865.5	11748.9	11865.5	11748.9	11748.9	527.05	10377	10887.5	10810.3	10879.7	10810.3	10818.2	527.02	11626.4	11683.8	11626.4	11683.8	11626.4	11626.4
																					527	10803.6	10878.8	10803.6	10871.1	10803.6	10811.3

## Sheet: Fig. 2i
MoO3		MoO2		Mo-foil		moox-5		moox-2
19677.7	0.01231	19675.2	0.01133	19675.2	0.01261	19677.2	0.01803	19677.5	0.01389
19678	0.01197	19675.5	0.01149	19675.5	0.01255	19677.5	0.0181	19677.8	0.01387
19678.3	0.01249	19675.8	0.01164	19675.8	0.01257	19677.8	0.01804	19678	0.01385
19678.5	0.01181	19676	0.01179	19676	0.0126	19678.1	0.01799	19678.3	0.01383
19678.8	0.01236	19676.3	0.01195	19676.3	0.01244	19678.4	0.01798	19678.6	0.01381
19679.1	0.0119	19676.6	0.01181	19676.6	0.01254	19678.7	0.01799	19678.9	0.01378
19679.4	0.01217	19676.9	0.01185	19676.9	0.01239	19679	0.0179	19679.2	0.01376
19679.7	0.01199	19677.2	0.01198	19677.2	0.01238	19679.4	0.0179	19679.5	0.01374
19680	0.0119	19677.5	0.01183	19677.5	0.01243	19679.7	0.01783	19679.8	0.01371
19680.3	0.01218	19677.8	0.01202	19677.8	0.01246	19680	0.01782	19680.1	0.01369
19680.6	0.0123	19678.1	0.01168	19678.1	0.01234	19680.4	0.01775	19680.4	0.01367
19680.9	0.01182	19678.4	0.0117	19678.4	0.01223	19680.8	0.01773	19680.7	0.01364
19681.2	0.01181	19678.7	0.01173	19678.7	0.01217	19681.2	0.0178	19681	0.01362
19681.5	0.01222	19679	0.01186	19679	0.01217	19681.6	0.01777	19681.3	0.0136
19681.9	0.0117	19679.4	0.01144	19679.4	0.01233	19681.9	0.01773	19681.6	0.01357
19682.2	0.01157	19679.7	0.01156	19679.7	0.01212	19682.3	0.01768	19682	0.01355
19682.5	0.01196	19680	0.01145	19680	0.01212	19682.7	0.01766	19682.3	0.01352
19682.9	0.01206	19680.4	0.01169	19680.4	0.01209	19683	0.01755	19682.7	0.01349
19683.3	0.0118	19680.8	0.01154	19680.8	0.0122	19683.4	0.0175	19683.1	0.01346
19683.7	0.01172	19681.2	0.0117	19681.2	0.01223	19683.8	0.01759	19683.4	0.01343
19684.1	0.01166	19681.6	0.01178	19681.6	0.01208	19684.2	0.01759	19683.8	0.0134
19684.4	0.01165	19681.9	0.01134	19681.9	0.01202	19684.5	0.01747	19684.2	0.01337
19684.8	0.01164	19682.3	0.01107	19682.3	0.0121	19684.9	0.0174	19684.6	0.01334
19685.2	0.01158	19682.7	0.01132	19682.7	0.01194	19685.3	0.01744	19685	0.01331
19685.5	0.01176	19683	0.01151	19683	0.01195	19685.7	0.01737	19685.3	0.01329
19685.9	0.01161	19683.4	0.01166	19683.4	0.01197	19686.1	0.01734	19685.7	0.01326
19686.3	0.01197	19683.8	0.01157	19683.8	0.01204	19686.5	0.01726	19686.1	0.01323
19686.7	0.01133	19684.2	0.01152	19684.2	0.01189	19686.8	0.01719	19686.4	0.0132
19687	0.01151	19684.5	0.01167	19684.5	0.01162	19687.2	0.01724	19686.8	0.01317
19687.4	0.0114	19684.9	0.01125	19684.9	0.01183	19687.6	0.01721	19687.2	0.01314
19687.8	0.01151	19685.3	0.01104	19685.3	0.01163	19687.9	0.01725	19687.6	0.01312
19688.2	0.01182	19685.7	0.01132	19685.7	0.01167	19688.2	0.01724	19688	0.01309
19688.6	0.0114	19686.1	0.01144	19686.1	0.01153	19688.6	0.01717	19688.3	0.01306
19689	0.01147	19686.5	0.01131	19686.5	0.01154	19688.9	0.01711	19688.7	0.01304
19689.3	0.0114	19686.8	0.01127	19686.8	0.01173	19689.3	0.01708	19689.1	0.01301
19689.7	0.01161	19687.2	0.01114	19687.2	0.01175	19689.6	0.01717	19689.5	0.01299
19690.1	0.01183	19687.6	0.01112	19687.6	0.01161	19689.9	0.01704	19689.8	0.01296
19690.4	0.01146	19687.9	0.01132	19687.9	0.01147	19690.3	0.01691	19690.2	0.01294
19690.7	0.01157	19688.2	0.01105	19688.2	0.01151	19690.6	0.01689	19690.5	0.01292
19691.1	0.01116	19688.6	0.01135	19688.6	0.01149	19690.9	0.01693	19690.9	0.0129
19691.4	0.01122	19688.9	0.01106	19688.9	0.01159	19691.2	0.01698	19691.2	0.01287
19691.8	0.01085	19689.3	0.01058	19689.3	0.01163	19691.5	0.01698	19691.5	0.01285
19692.1	0.01126	19689.6	0.01092	19689.6	0.01152	19691.8	0.01694	19691.9	0.01283
19692.4	0.01094	19689.9	0.01105	19689.9	0.01144	19692.1	0.01683	19692.2	0.0128
19692.8	0.01117	19690.3	0.01114	19690.3	0.0113	19692.4	0.01685	19692.5	0.01278
19693.1	0.01119	19690.6	0.01093	19690.6	0.01131	19692.7	0.01676	19692.9	0.01276
19693.4	0.01089	19690.9	0.01093	19690.9	0.01144	19693	0.01673	19693.2	0.01274
19693.7	0.01091	19691.2	0.01097	19691.2	0.01147	19693.2	0.01672	19693.5	0.01271
19694	0.01103	19691.5	0.01078	19691.5	0.01127	19693.5	0.01666	19693.8	0.01268
19694.3	0.01113	19691.8	0.01076	19691.8	0.01139	19693.8	0.01661	19694.1	0.01266
19694.6	0.01115	19692.1	0.01055	19692.1	0.01141	19694.1	0.01662	19694.4	0.01263
19694.9	0.01118	19692.4	0.01062	19692.4	0.01143	19694.5	0.01661	19694.7	0.01261
19695.2	0.01117	19692.7	0.01074	19692.7	0.01138	19694.8	0.01663	19695	0.01258
19695.5	0.01095	19693	0.01058	19693	0.01125	19695	0.01657	19695.2	0.01256
19695.7	0.01098	19693.2	0.01071	19693.2	0.01127	19695.4	0.01651	19695.5	0.01253
19696	0.01082	19693.5	0.01081	19693.5	0.01118	19695.7	0.01642	19695.8	0.01251
19696.3	0.01061	19693.8	0.01041	19693.8	0.011	19696	0.01637	19696.1	0.01248
19696.6	0.01085	19694.1	0.01025	19694.1	0.0111	19696.3	0.01634	19696.4	0.01245
19697	0.01076	19694.5	0.01067	19694.5	0.01125	19696.6	0.01635	19696.7	0.01242
19697.3	0.01109	19694.8	0.01045	19694.8	0.01113	19696.9	0.01638	19697	0.0124
19697.5	0.01059	19695	0.01056	19695	0.01115	19697.3	0.01634	19697.3	0.01237
19697.9	0.01044	19695.4	0.01052	19695.4	0.01115	19697.6	0.01627	19697.6	0.01234
19698.2	0.0107	19695.7	0.01051	19695.7	0.01106	19698	0.01629	19697.9	0.01231
19698.5	0.01104	19696	0.00995	19696	0.01102	19698.4	0.01614	19698.2	0.01229
19698.8	0.0109	19696.3	0.01026	19696.3	0.01101	19698.8	0.01615	19698.5	0.01226
19699.1	0.01081	19696.6	0.01056	19696.6	0.01126	19699.2	0.01618	19698.9	0.01223
19699.4	0.01058	19696.9	0.01069	19696.9	0.01099	19699.6	0.01606	19699.2	0.01221
19699.8	0.0103	19697.3	0.01005	19697.3	0.0109	19699.9	0.01603	19699.5	0.01219
19700.1	0.0106	19697.6	0.01013	19697.6	0.0108	19700.3	0.01599	19699.9	0.01216
19700.5	0.01035	19698	0.00991	19698	0.01089	19700.7	0.01593	19700.3	0.01214
19700.9	0.01069	19698.4	0.01004	19698.4	0.01077	19701	0.0158	19700.7	0.01212
19701.3	0.01095	19698.8	0.01015	19698.8	0.01073	19701.4	0.01579	19701	0.01209
19701.7	0.01061	19699.2	0.01013	19699.2	0.01081	19701.8	0.01574	19701.4	0.01207
19702.1	0.0104	19699.6	0.01028	19699.6	0.01078	19702.2	0.01571	19701.8	0.01204
19702.4	0.00986	19699.9	0.01021	19699.9	0.01075	19702.6	0.01561	19702.2	0.01202
19702.8	0.01066	19700.3	0.01003	19700.3	0.01058	19702.9	0.0156	19702.6	0.01199
19703.2	0.01043	19700.7	0.01019	19700.7	0.01042	19703.3	0.01547	19703	0.01197
19703.5	0.01024	19701	0.01027	19701	0.01058	19703.7	0.01556	19703.3	0.01195
19703.9	0.01036	19701.4	0.01049	19701.4	0.01067	19704.1	0.01535	19703.7	0.01193
19704.3	0.00974	19701.8	0.01027	19701.8	0.01066	19704.5	0.01549	19704.1	0.0119
19704.7	0.01009	19702.2	0.01005	19702.2	0.01061	19704.8	0.01532	19704.4	0.01188
19705.1	0.01011	19702.6	0.01004	19702.6	0.01066	19705.2	0.01527	19704.8	0.01185
19705.4	0.01043	19702.9	0.00996	19702.9	0.01053	19705.5	0.01529	19705.2	0.01183
19705.8	0.01048	19703.3	0.00972	19703.3	0.01049	19705.9	0.01516	19705.6	0.01179
19706.2	0.0102	19703.7	0.00953	19703.7	0.01044	19706.2	0.0152	19706	0.01176
19706.6	0.01021	19704.1	0.00962	19704.1	0.01062	19706.6	0.01515	19706.4	0.01172
19707	0.01023	19704.5	0.01002	19704.5	0.01021	19706.9	0.01517	19706.8	0.01169
19707.3	0.00996	19704.8	0.01016	19704.8	0.01041	19707.3	0.01509	19707.1	0.01166
19707.7	0.00978	19705.2	0.01002	19705.2	0.01007	19707.6	0.01497	19707.5	0.01163
19708	0.0101	19705.5	0.00989	19705.5	0.0102	19707.9	0.01498	19707.8	0.0116
19708.4	0.0101	19705.9	0.00975	19705.9	0.01039	19708.2	0.01502	19708.2	0.01157
19708.7	0.01009	19706.2	0.00961	19706.2	0.01013	19708.6	0.01483	19708.5	0.01154
19709.1	0.00972	19706.6	0.00992	19706.6	0.01013	19708.9	0.01478	19708.8	0.01151
19709.4	0.00997	19706.9	0.00981	19706.9	0.01022	19709.2	0.01487	19709.2	0.01148
19709.8	0.00999	19707.3	0.0097	19707.3	0.01021	19709.5	0.01485	19709.5	0.01145
19710.1	0.01026	19707.6	0.00958	19707.6	0.01017	19709.8	0.01482	19709.9	0.01142
19710.4	0.0099	19707.9	0.00957	19707.9	0.01	19710	0.01476	19710.2	0.01139
19710.7	0.00954	19708.2	0.00931	19708.2	0.01004	19710.3	0.01472	19710.5	0.01136
19711.1	0.01015	19708.6	0.00983	19708.6	0.01015	19710.6	0.01467	19710.8	0.01133
19711.4	0.00966	19708.9	0.00973	19708.9	0.00988	19710.9	0.0146	19711.2	0.0113
19711.7	0.00981	19709.2	0.00936	19709.2	0.00983	19711.2	0.0146	19711.4	0.01128
19712	0.00995	19709.5	0.00953	19709.5	0.01005	19711.5	0.0146	19711.7	0.01126
19712.3	0.00992	19709.8	0.00963	19709.8	0.00979	19711.8	0.01455	19712	0.01124
19712.5	0.01002	19710	0.00973	19710	0.01007	19712.1	0.01454	19712.3	0.01122
19712.8	0.00972	19710.3	0.00955	19710.3	0.00998	19712.4	0.01447	19712.6	0.0112
19713.1	0.00982	19710.6	0.00949	19710.6	0.01001	19712.7	0.01443	19712.9	0.01118
19713.4	0.00992	19710.9	0.00937	19710.9	0.00991	19713	0.01446	19713.2	0.01116
19713.7	0.00961	19711.2	0.00939	19711.2	0.00994	19713.3	0.01447	19713.5	0.01114
19714	0.00961	19711.5	0.00912	19711.5	0.00997	19713.6	0.0144	19713.8	0.01112
19714.3	0.00933	19711.8	0.00912	19711.8	0.00993	19713.9	0.01432	19714.1	0.01109
19714.6	0.00971	19712.1	0.00936	19712.1	0.00984	19714.2	0.01431	19714.4	0.01107
19714.9	0.00945	19712.4	0.0093	19712.4	0.00961	19714.6	0.01441	19714.7	0.01105
19715.2	0.00948	19712.7	0.00929	19712.7	0.00985	19714.9	0.01442	19715	0.01103
19715.5	0.00956	19713	0.00923	19713	0.00987	19715.3	0.01441	19715.3	0.01101
19715.8	0.00968	19713.3	0.00927	19713.3	0.00978	19715.7	0.0142	19715.6	0.01098
19716.1	0.00948	19713.6	0.00896	19713.6	0.00966	19716	0.01419	19715.9	0.01096
19716.4	0.0096	19713.9	0.00921	19713.9	0.00951	19716.4	0.01427	19716.2	0.01094
19716.7	0.00932	19714.2	0.00901	19714.2	0.00967	19716.8	0.01433	19716.5	0.01092
19717.1	0.00915	19714.6	0.00898	19714.6	0.00957	19717.2	0.01415	19716.8	0.01089
19717.4	0.00961	19714.9	0.00845	19714.9	0.00953	19717.6	0.0141	19717.2	0.01087
19717.8	0.00915	19715.3	0.009	19715.3	0.00954	19718	0.01412	19717.6	0.01084
19718.2	0.00914	19715.7	0.00899	19715.7	0.00932	19718.3	0.01398	19717.9	0.01081
19718.5	0.00938	19716	0.00887	19716	0.00943	19718.7	0.01405	19718.3	0.01078
19718.9	0.00945	19716.4	0.00901	19716.4	0.00933	19719.1	0.014	19718.7	0.01075
19719.3	0.00918	19716.8	0.00891	19716.8	0.00927	19719.4	0.01394	19719.1	0.01071
19719.7	0.00943	19717.2	0.00871	19717.2	0.00945	19719.8	0.01394	19719.5	0.01068
19720.1	0.0095	19717.6	0.00883	19717.6	0.00957	19720.2	0.01392	19719.9	0.01065
19720.5	0.00932	19718	0.00882	19718	0.00957	19720.6	0.01386	19720.2	0.01062
19720.8	0.00958	19718.3	0.00855	19718.3	0.00927	19721	0.0138	19720.6	0.01059
19721.2	0.00928	19718.7	0.00853	19718.7	0.00932	19721.4	0.01384	19721	0.01056
19721.6	0.00917	19719.1	0.00867	19719.1	0.00922	19721.8	0.01382	19721.4	0.01054
19721.9	0.0092	19719.4	0.00867	19719.4	0.00898	19722.2	0.01375	19721.7	0.01051
19722.3	0.00908	19719.8	0.0087	19719.8	0.00923	19722.5	0.01373	19722.1	0.01047
19722.7	0.00892	19720.2	0.00858	19720.2	0.0092	19722.9	0.01374	19722.5	0.01044
19723.1	0.00883	19720.6	0.00874	19720.6	0.00918	19723.2	0.01367	19722.9	0.01041
19723.5	0.00918	19721	0.00864	19721	0.00916	19723.6	0.01352	19723.3	0.01038
19723.9	0.00926	19721.4	0.00822	19721.4	0.00911	19723.9	0.01361	19723.7	0.01035
19724.3	0.00907	19721.8	0.0082	19721.8	0.00905	19724.3	0.01346	19724.1	0.01031
19724.7	0.00875	19722.2	0.00851	19722.2	0.00897	19724.6	0.01353	19724.4	0.01028
19725	0.00898	19722.5	0.00862	19722.5	0.00897	19725	0.01346	19724.8	0.01025
19725.4	0.00866	19722.9	0.00866	19722.9	0.00904	19725.3	0.01343	19725.2	0.01022
19725.7	0.00882	19723.2	0.0085	19723.2	0.00907	19725.6	0.01349	19725.5	0.01019
19726.1	0.0093	19723.6	0.00869	19723.6	0.00896	19726	0.01343	19725.9	0.01016
19726.4	0.00944	19723.9	0.00842	19723.9	0.00896	19726.3	0.01336	19726.2	0.01013
19726.8	0.00883	19724.3	0.00842	19724.3	0.0089	19726.6	0.01337	19726.5	0.0101
19727.1	0.00898	19724.6	0.00865	19724.6	0.00886	19726.9	0.01341	19726.9	0.01007
19727.5	0.00893	19725	0.00825	19725	0.00889	19727.2	0.01338	19727.2	0.01004
19727.8	0.0088	19725.3	0.00838	19725.3	0.00894	19727.5	0.01328	19727.6	0.01001
19728.1	0.0087	19725.6	0.00846	19725.6	0.00869	19727.8	0.01329	19727.9	0.00999
19728.5	0.00867	19726	0.0086	19726	0.00883	19728.1	0.01318	19728.2	0.00996
19728.8	0.00899	19726.3	0.00828	19726.3	0.00879	19728.3	0.01315	19728.6	0.00993
19729.1	0.00834	19726.6	0.00832	19726.6	0.0088	19728.6	0.01316	19728.9	0.0099
19729.4	0.00874	19726.9	0.00832	19726.9	0.00875	19728.9	0.01314	19729.2	0.00988
19729.7	0.00819	19727.2	0.00818	19727.2	0.00866	19729.2	0.01304	19729.5	0.00985
19730	0.00869	19727.5	0.00829	19727.5	0.00867	19729.5	0.01303	19729.8	0.00983
19730.3	0.00849	19727.8	0.00838	19727.8	0.00872	19729.8	0.01309	19730	0.00981
19730.6	0.00849	19728.1	0.00815	19728.1	0.00884	19730.1	0.01308	19730.3	0.00978
19730.8	0.00849	19728.3	0.00801	19728.3	0.00875	19730.5	0.01299	19730.6	0.00976
19731.1	0.00842	19728.6	0.00814	19728.6	0.00866	19730.8	0.01309	19730.9	0.00974
19731.4	0.00867	19728.9	0.00807	19728.9	0.00859	19731.1	0.01302	19731.2	0.00971
19731.7	0.00866	19729.2	0.00809	19729.2	0.00856	19731.4	0.01289	19731.5	0.00969
19732	0.00832	19729.5	0.00804	19729.5	0.00855	19731.7	0.01279	19731.8	0.00966
19732.3	0.00834	19729.8	0.00815	19729.8	0.00854	19732	0.01281	19732.1	0.00964
19732.6	0.00809	19730.1	0.00792	19730.1	0.00864	19732.4	0.01283	19732.4	0.00961
19733	0.00825	19730.5	0.0083	19730.5	0.00877	19732.7	0.01278	19732.7	0.00959
19733.3	0.00842	19730.8	0.00799	19730.8	0.00861	19733.1	0.01264	19733.1	0.00956
19733.6	0.0083	19731.1	0.00791	19731.1	0.00857	19733.5	0.01261	19733.4	0.00953
19733.9	0.00846	19731.4	0.0081	19731.4	0.00844	19733.9	0.01263	19733.7	0.00951
19734.2	0.00848	19731.7	0.00785	19731.7	0.00831	19734.3	0.01258	19734	0.00948
19734.5	0.00775	19732	0.00788	19732	0.00832	19734.7	0.01248	19734.3	0.00946
19734.9	0.00831	19732.4	0.00779	19732.4	0.0082	19735.1	0.0125	19734.7	0.00943
19735.2	0.00785	19732.7	0.00743	19732.7	0.00813	19735.5	0.01248	19735	0.0094
19735.6	0.0084	19733.1	0.00774	19733.1	0.00832	19735.8	0.01237	19735.4	0.00937
19736	0.00801	19733.5	0.00787	19733.5	0.00821	19736.2	0.0123	19735.8	0.00933
19736.4	0.00839	19733.9	0.00783	19733.9	0.00829	19736.6	0.0123	19736.2	0.0093
19736.8	0.00782	19734.3	0.00797	19734.3	0.00813	19737	0.01215	19736.6	0.00926
19737.2	0.00829	19734.7	0.00781	19734.7	0.00828	19737.3	0.01212	19737	0.00923
19737.6	0.00782	19735.1	0.00784	19735.1	0.00807	19737.7	0.01214	19737.4	0.0092
19738	0.00816	19735.5	0.00785	19735.5	0.00808	19738.1	0.01207	19737.7	0.00917
19738.3	0.00784	19735.8	0.00759	19735.8	0.00793	19738.5	0.01205	19738.1	0.00914
19738.7	0.00767	19736.2	0.00763	19736.2	0.00789	19738.9	0.012	19738.5	0.0091
19739.1	0.00789	19736.6	0.00793	19736.6	0.00787	19739.3	0.01194	19738.9	0.00907
19739.5	0.00772	19737	0.00777	19737	0.00798	19739.7	0.01189	19739.2	0.00904
19739.8	0.00794	19737.3	0.00767	19737.3	0.00787	19740.1	0.01181	19739.6	0.00901
19740.2	0.00813	19737.7	0.00778	19737.7	0.00809	19740.4	0.01188	19740	0.00897
19740.6	0.00785	19738.1	0.00761	19738.1	0.00782	19740.8	0.01178	19740.4	0.00894
19741	0.00772	19738.5	0.00767	19738.5	0.00784	19741.1	0.01171	19740.8	0.00891
19741.4	0.0079	19738.9	0.00751	19738.9	0.00799	19741.5	0.01167	19741.2	0.00888
19741.8	0.00754	19739.3	0.00742	19739.3	0.00789	19741.8	0.01165	19741.6	0.00885
19742.2	0.00762	19739.7	0.00761	19739.7	0.00777	19742.2	0.01159	19742	0.00882
19742.6	0.00761	19740.1	0.00762	19740.1	0.0078	19742.5	0.01153	19742.3	0.0088
19742.9	0.00773	19740.4	0.00739	19740.4	0.00782	19742.9	0.01149	19742.7	0.00877
19743.3	0.00804	19740.8	0.00726	19740.8	0.00774	19743.2	0.01142	19743.1	0.00874
19743.6	0.0077	19741.1	0.00753	19741.1	0.00784	19743.5	0.01149	19743.4	0.00872
19744	0.00747	19741.5	0.00739	19741.5	0.00774	19743.9	0.01146	19743.8	0.00869
19744.3	0.00776	19741.8	0.00741	19741.8	0.00775	19744.2	0.01135	19744.1	0.00867
19744.7	0.00737	19742.2	0.00718	19742.2	0.00779	19744.5	0.01131	19744.4	0.00864
19745	0.00773	19742.5	0.00737	19742.5	0.00778	19744.8	0.01134	19744.8	0.00862
19745.4	0.00748	19742.9	0.00681	19742.9	0.00772	19745.1	0.01133	19745.1	0.00859
19745.7	0.00767	19743.2	0.00703	19743.2	0.00775	19745.4	0.01127	19745.5	0.00857
19746	0.00739	19743.5	0.00722	19743.5	0.00768	19745.7	0.01121	19745.8	0.00854
19746.4	0.00748	19743.9	0.00739	19743.9	0.00757	19745.9	0.01117	19746.1	0.00852
19746.7	0.00766	19744.2	0.00709	19744.2	0.00754	19746.2	0.01117	19746.5	0.0085
19747	0.00705	19744.5	0.00715	19744.5	0.00756	19746.5	0.01115	19746.8	0.00847
19747.3	0.00705	19744.8	0.00702	19744.8	0.0077	19746.8	0.01112	19747.1	0.00845
19747.6	0.00731	19745.1	0.00715	19745.1	0.00751	19747.2	0.01108	19747.4	0.00842
19747.9	0.00736	19745.4	0.00693	19745.4	0.00738	19747.5	0.01106	19747.6	0.0084
19748.2	0.00729	19745.7	0.00703	19745.7	0.00742	19747.8	0.01108	19747.9	0.00837
19748.4	0.00676	19745.9	0.00687	19745.9	0.00752	19748.1	0.01101	19748.2	0.00835
19748.7	0.00721	19746.2	0.0071	19746.2	0.00746	19748.4	0.01098	19748.5	0.00832
19749	0.00678	19746.5	0.00696	19746.5	0.00726	19748.7	0.01101	19748.8	0.0083
19749.3	0.00737	19746.8	0.00714	19746.8	0.00723	19749	0.01101	19749.1	0.00827
19749.7	0.00711	19747.2	0.00712	19747.2	0.00724	19749.3	0.01094	19749.4	0.00824
19750	0.00719	19747.5	0.0068	19747.5	0.00737	19749.7	0.01091	19749.7	0.00822
19750.3	0.00711	19747.8	0.0065	19747.8	0.0073	19750	0.0109	19750.1	0.00819
19750.6	0.00682	19748.1	0.00716	19748.1	0.00726	19750.4	0.0108	19750.4	0.00816
19750.9	0.00722	19748.4	0.00732	19748.4	0.0072	19750.8	0.01082	19750.7	0.00813
19751.2	0.00725	19748.7	0.00737	19748.7	0.00746	19751.1	0.0109	19751	0.00811
19751.5	0.00678	19749	0.00671	19749	0.00731	19751.5	0.01085	19751.3	0.00808
19751.8	0.00706	19749.3	0.0066	19749.3	0.00715	19751.9	0.01076	19751.6	0.00805
19752.2	0.00717	19749.7	0.00668	19749.7	0.00704	19752.3	0.0108	19751.9	0.00802
19752.5	0.00678	19750	0.00686	19750	0.00722	19752.7	0.01072	19752.3	0.00799
19752.9	0.00692	19750.4	0.00674	19750.4	0.00719	19753.1	0.0107	19752.7	0.00796
19753.3	0.00622	19750.8	0.00659	19750.8	0.00702	19753.5	0.01066	19753	0.00794
19753.6	0.00649	19751.1	0.00681	19751.1	0.00684	19753.9	0.0106	19753.4	0.00791
19754	0.00685	19751.5	0.00666	19751.5	0.00701	19754.2	0.0105	19753.8	0.00788
19754.4	0.00637	19751.9	0.00639	19751.9	0.0068	19754.6	0.01047	19754.2	0.00785
19754.8	0.00668	19752.3	0.00649	19752.3	0.00699	19755	0.0105	19754.6	0.00782
19755.2	0.00662	19752.7	0.00661	19752.7	0.00704	19755.4	0.01045	19755	0.0078
19755.6	0.00726	19753.1	0.0066	19753.1	0.00692	19755.8	0.01044	19755.4	0.00777
19756	0.00653	19753.5	0.00653	19753.5	0.00706	19756.2	0.01045	19755.8	0.00774
19756.4	0.00697	19753.9	0.00645	19753.9	0.00687	19756.6	0.01037	19756.1	0.00772
19756.7	0.00651	19754.2	0.00648	19754.2	0.00689	19757	0.0104	19756.5	0.00769
19757.1	0.0065	19754.6	0.00653	19754.6	0.00694	19757.3	0.01038	19756.9	0.00766
19757.5	0.007	19755	0.00643	19755	0.00683	19757.7	0.01031	19757.3	0.00764
19757.9	0.00668	19755.4	0.00638	19755.4	0.00654	19758.1	0.01034	19757.7	0.00761
19758.3	0.00651	19755.8	0.00638	19755.8	0.00655	19758.4	0.01017	19758.1	0.00758
19758.7	0.00616	19756.2	0.00629	19756.2	0.00648	19758.8	0.01033	19758.5	0.00755
19759.1	0.00633	19756.6	0.00627	19756.6	0.0065	19759.2	0.01022	19758.9	0.00752
19759.5	0.0072	19757	0.00648	19757	0.00652	19759.5	0.01021	19759.2	0.00748
19759.8	0.00655	19757.3	0.00639	19757.3	0.00641	19759.8	0.01006	19759.6	0.00744
19760.2	0.00628	19757.7	0.00622	19757.7	0.00644	19760.2	0.01003	19760	0.00741
19760.6	0.00673	19758.1	0.0062	19758.1	0.00647	19760.5	0.01011	19760.4	0.00738
19760.9	0.00643	19758.4	0.00615	19758.4	0.00656	19760.9	0.01009	19760.7	0.00734
19761.3	0.00652	19758.8	0.00624	19758.8	0.00653	19761.2	0.01008	19761.1	0.00731
19761.7	0.00634	19759.2	0.00624	19759.2	0.00645	19761.5	0.00999	19761.4	0.00728
19762	0.00648	19759.5	0.00628	19759.5	0.00649	19761.8	0.00993	19761.8	0.00724
19762.3	0.00633	19759.8	0.00642	19759.8	0.00647	19762.2	0.00991	19762.1	0.00721
19762.7	0.00652	19760.2	0.00591	19760.2	0.00646	19762.4	0.00988	19762.5	0.00718
19763	0.00649	19760.5	0.00597	19760.5	0.00652	19762.7	0.00988	19762.8	0.00715
19763.4	0.00614	19760.9	0.00604	19760.9	0.00651	19763	0.00992	19763.1	0.00712
19763.7	0.00646	19761.2	0.00566	19761.2	0.0065	19763.3	0.00991	19763.5	0.00708
19764	0.00607	19761.5	0.00615	19761.5	0.00627	19763.6	0.00984	19763.8	0.00705
19764.3	0.00643	19761.8	0.00563	19761.8	0.00627	19763.9	0.00978	19764.1	0.00702
19764.7	0.00637	19762.2	0.00593	19762.2	0.00629	19764.2	0.00974	19764.4	0.00699
19764.9	0.00616	19762.4	0.00596	19762.4	0.00632	19764.5	0.00971	19764.7	0.00697
19765.2	0.00621	19762.7	0.00606	19762.7	0.0063	19764.8	0.00969	19765	0.00695
19765.5	0.00629	19763	0.00607	19763	0.00616	19765.1	0.00969	19765.3	0.00693
19765.8	0.00586	19763.3	0.00629	19763.3	0.00629	19765.4	0.00961	19765.6	0.00691
19766.1	0.00611	19763.6	0.00606	19763.6	0.00611	19765.7	0.00959	19765.9	0.00689
19766.4	0.00589	19763.9	0.00583	19763.9	0.00627	19766	0.00959	19766.2	0.00687
19766.7	0.00596	19764.2	0.0057	19764.2	0.00622	19766.3	0.00953	19766.5	0.00685
19767	0.00627	19764.5	0.006	19764.5	0.00607	19766.7	0.00954	19766.8	0.00682
19767.3	0.0062	19764.8	0.00576	19764.8	0.00608	19767	0.0095	19767.1	0.0068
19767.6	0.0057	19765.1	0.00568	19765.1	0.00608	19767.3	0.00942	19767.4	0.00678
19767.9	0.00635	19765.4	0.00539	19765.4	0.00594	19767.7	0.00931	19767.7	0.00676
19768.2	0.00589	19765.7	0.00569	19765.7	0.00591	19768	0.00936	19768	0.00673
19768.5	0.00606	19766	0.00608	19766	0.00589	19768.4	0.00931	19768.3	0.00671
19768.8	0.00591	19766.3	0.00554	19766.3	0.00585	19768.8	0.00919	19768.6	0.00669
19769.2	0.0057	19766.7	0.0057	19766.7	0.00588	19769.2	0.00925	19769	0.00667
19769.5	0.00574	19767	0.00603	19767	0.00571	19769.6	0.00911	19769.3	0.00664
19769.8	0.0058	19767.3	0.00544	19767.3	0.00605	19770	0.00905	19769.6	0.00662
19770.2	0.00616	19767.7	0.00531	19767.7	0.00602	19770.4	0.00905	19769.9	0.00659
19770.5	0.00589	19768	0.00548	19768	0.00585	19770.7	0.00881	19770.3	0.00657
19770.9	0.00558	19768.4	0.00532	19768.4	0.00587	19771.1	0.00897	19770.7	0.00654
19771.3	0.00598	19768.8	0.00557	19768.8	0.00576	19771.5	0.0089	19771	0.00652
19771.7	0.00569	19769.2	0.0054	19769.2	0.00572	19771.9	0.00888	19771.4	0.0065
19772.1	0.00587	19769.6	0.00537	19769.6	0.0058	19772.3	0.00881	19771.8	0.00648
19772.5	0.00529	19770	0.00529	19770	0.00578	19772.6	0.00874	19772.2	0.00645
19772.9	0.00536	19770.4	0.0055	19770.4	0.00606	19773	0.00876	19772.6	0.00643
19773.2	0.00533	19770.7	0.00553	19770.7	0.00591	19773.4	0.00872	19773	0.0064
19773.6	0.00539	19771.1	0.00537	19771.1	0.00547	19773.8	0.00855	19773.4	0.00638
19774	0.00563	19771.5	0.00528	19771.5	0.00554	19774.2	0.00866	19773.8	0.00636
19774.4	0.00529	19771.9	0.00523	19771.9	0.00552	19774.6	0.0087	19774.2	0.00634
19774.8	0.00538	19772.3	0.00535	19772.3	0.00556	19775	0.0085	19774.5	0.00631
19775.1	0.00556	19772.6	0.00525	19772.6	0.00568	19775.4	0.00845	19774.9	0.00629
19775.5	0.00537	19773	0.00502	19773	0.00556	19775.7	0.00843	19775.3	0.00627
19775.9	0.00547	19773.4	0.00517	19773.4	0.00549	19776.1	0.0084	19775.7	0.00624
19776.3	0.00507	19773.8	0.00526	19773.8	0.00545	19776.5	0.00834	19776.1	0.00622
19776.7	0.00534	19774.2	0.00512	19774.2	0.00568	19776.8	0.00832	19776.5	0.0062
19777.1	0.00565	19774.6	0.005	19774.6	0.00547	19777.2	0.00829	19776.9	0.00617
19777.5	0.00516	19775	0.00493	19775	0.00522	19777.5	0.00827	19777.3	0.00614
19777.9	0.00526	19775.4	0.0049	19775.4	0.00559	19777.9	0.00823	19777.7	0.00611
19778.2	0.00496	19775.7	0.005	19775.7	0.00563	19778.2	0.00818	19778	0.00608
19778.6	0.00512	19776.1	0.00525	19776.1	0.00531	19778.5	0.00805	19778.4	0.00605
19779	0.0052	19776.5	0.00502	19776.5	0.00545	19778.9	0.00808	19778.7	0.00603
19779.3	0.0055	19776.8	0.00508	19776.8	0.00546	19779.2	0.00807	19779.1	0.006
19779.7	0.00552	19777.2	0.00489	19777.2	0.00533	19779.5	0.00798	19779.4	0.00597
19780	0.00534	19777.5	0.00505	19777.5	0.00518	19779.8	0.00807	19779.8	0.00595
19780.4	0.00513	19777.9	0.00468	19777.9	0.00506	19780.1	0.00805	19780.1	0.00592
19780.7	0.00517	19778.2	0.00466	19778.2	0.00518	19780.4	0.00804	19780.5	0.0059
19781	0.00515	19778.5	0.00476	19778.5	0.00516	19780.7	0.00802	19780.8	0.00587
19781.4	0.00493	19778.9	0.00502	19778.9	0.0051	19781	0.00794	19781.2	0.00584
19781.7	0.00516	19779.2	0.00469	19779.2	0.00521	19781.3	0.00782	19781.5	0.00582
19782	0.005	19779.5	0.00503	19779.5	0.00518	19781.6	0.00786	19781.8	0.00579
19782.3	0.00485	19779.8	0.0049	19779.8	0.00516	19781.9	0.00792	19782.1	0.00577
19782.6	0.00505	19780.1	0.00477	19780.1	0.00507	19782.2	0.00787	19782.4	0.00575
19782.9	0.00526	19780.4	0.00476	19780.4	0.00508	19782.5	0.00774	19782.7	0.00572
19783.2	0.00523	19780.7	0.00499	19780.7	0.00511	19782.8	0.00783	19783	0.0057
19783.5	0.00503	19781	0.00497	19781	0.00508	19783.1	0.00782	19783.3	0.00568
19783.8	0.00492	19781.3	0.00482	19781.3	0.00502	19783.4	0.00781	19783.6	0.00565
19784.1	0.00498	19781.6	0.00455	19781.6	0.00502	19783.7	0.00779	19783.8	0.00563
19784.4	0.00449	19781.9	0.00462	19781.9	0.0051	19784.1	0.00771	19784.1	0.00561
19784.7	0.00469	19782.2	0.00486	19782.2	0.00504	19784.4	0.00773	19784.4	0.00558
19785	0.00471	19782.5	0.00475	19782.5	0.0049	19784.7	0.00761	19784.8	0.00556
19785.3	0.00524	19782.8	0.00447	19782.8	0.00484	19785	0.00757	19785.1	0.00553
19785.6	0.00486	19783.1	0.0047	19783.1	0.00487	19785.4	0.0076	19785.4	0.00551
19785.9	0.00488	19783.4	0.00427	19783.4	0.00481	19785.7	0.00763	19785.7	0.00548
19786.2	0.00497	19783.7	0.00434	19783.7	0.00485	19786.1	0.00756	19786	0.00546
19786.6	0.00436	19784.1	0.00463	19784.1	0.00496	19786.5	0.00751	19786.3	0.00543
19786.9	0.00457	19784.4	0.00466	19784.4	0.00497	19786.9	0.00752	19786.6	0.00541
19787.2	0.00507	19784.7	0.00441	19784.7	0.0048	19787.3	0.0075	19787	0.00538
19787.5	0.00409	19785	0.00424	19785	0.00471	19787.7	0.00749	19787.3	0.00535
19787.9	0.00466	19785.4	0.00453	19785.4	0.00473	19788.1	0.00735	19787.6	0.00533
19788.2	0.00449	19785.7	0.0041	19785.7	0.00469	19788.5	0.0073	19788	0.0053
19788.6	0.00474	19786.1	0.0044	19786.1	0.00474	19788.8	0.00738	19788.4	0.00527
19789	0.00436	19786.5	0.00445	19786.5	0.00443	19789.2	0.0073	19788.8	0.00524
19789.4	0.00464	19786.9	0.00447	19786.9	0.00468	19789.6	0.00727	19789.2	0.00522
19789.8	0.0045	19787.3	0.00422	19787.3	0.00458	19790	0.00734	19789.5	0.00519
19790.2	0.00437	19787.7	0.00436	19787.7	0.00447	19790.4	0.00737	19790	0.00517
19790.6	0.00449	19788.1	0.00441	19788.1	0.00448	19790.8	0.00714	19790.3	0.00514
19791	0.0049	19788.5	0.00425	19788.5	0.00456	19791.2	0.00723	19790.7	0.00512
19791.3	0.0046	19788.8	0.00414	19788.8	0.00449	19791.6	0.00735	19791.1	0.00509
19791.7	0.00434	19789.2	0.00422	19789.2	0.00441	19792	0.00721	19791.5	0.00507
19792.1	0.00433	19789.6	0.00427	19789.6	0.00432	19792.4	0.00706	19791.9	0.00504
19792.5	0.00411	19790	0.00407	19790	0.0044	19792.8	0.00712	19792.3	0.00502
19792.9	0.00413	19790.4	0.00408	19790.4	0.00451	19793.1	0.00715	19792.7	0.00499
19793.3	0.00423	19790.8	0.00399	19790.8	0.00447	19793.5	0.007	19793	0.00497
19793.7	0.00431	19791.2	0.00408	19791.2	0.00427	19793.9	0.00693	19793.5	0.00494
19794.1	0.00431	19791.6	0.004	19791.6	0.00413	19794.2	0.00694	19793.8	0.00492
19794.5	0.00449	19792	0.00414	19792	0.00408	19794.6	0.00692	19794.2	0.00489
19794.9	0.00412	19792.4	0.00419	19792.4	0.00433	19794.9	0.00691	19794.6	0.00486
19795.3	0.00416	19792.8	0.00409	19792.8	0.00426	19795.3	0.00696	19795	0.00483
19795.6	0.00417	19793.1	0.00396	19793.1	0.00429	19795.6	0.00685	19795.4	0.0048
19796	0.00388	19793.5	0.00384	19793.5	0.00426	19796	0.0069	19795.8	0.00477
19796.4	0.00407	19793.9	0.00388	19793.9	0.00416	19796.3	0.0068	19796.1	0.00475
19796.7	0.00399	19794.2	0.00398	19794.2	0.00428	19796.6	0.00677	19796.5	0.00472
19797.1	0.00361	19794.6	0.00421	19794.6	0.00411	19797	0.00667	19796.8	0.00469
19797.4	0.00453	19794.9	0.00391	19794.9	0.00397	19797.3	0.0066	19797.2	0.00467
19797.8	0.00422	19795.3	0.00393	19795.3	0.00394	19797.6	0.00667	19797.5	0.00464
19798.1	0.00403	19795.6	0.00375	19795.6	0.00394	19797.9	0.00668	19797.9	0.00461
19798.5	0.00375	19796	0.00377	19796	0.00398	19798.2	0.00662	19798.2	0.00459
19798.8	0.00368	19796.3	0.00362	19796.3	0.00403	19798.5	0.00656	19798.6	0.00456
19799.1	0.00418	19796.6	0.00401	19796.6	0.00405	19798.8	0.00654	19798.9	0.00453
19799.5	0.00428	19797	0.00389	19797	0.00396	19799	0.00653	19799.2	0.00451
19799.8	0.00397	19797.3	0.00407	19797.3	0.0039	19799.3	0.00651	19799.6	0.00448
19800.1	0.00412	19797.6	0.00361	19797.6	0.00401	19799.6	0.00644	19799.9	0.00446
19800.4	0.00406	19797.9	0.00354	19797.9	0.00413	19800	0.00637	19800.2	0.00444
19800.7	0.0037	19798.2	0.00356	19798.2	0.00376	19800.3	0.00641	19800.5	0.00442
19801	0.00351	19798.5	0.00347	19798.5	0.00393	19800.6	0.00636	19800.8	0.0044
19801.3	0.00375	19798.8	0.00347	19798.8	0.00397	19800.9	0.00639	19801	0.00438
19801.5	0.00377	19799	0.0036	19799	0.00396	19801.2	0.0064	19801.3	0.00436
19801.8	0.0037	19799.3	0.00375	19799.3	0.004	19801.5	0.00629	19801.6	0.00434
19802.1	0.00364	19799.6	0.00372	19799.6	0.00403	19801.8	0.00631	19801.9	0.00432
19802.5	0.00353	19800	0.00359	19800	0.00363	19802.2	0.00622	19802.2	0.0043
19802.8	0.0039	19800.3	0.00347	19800.3	0.00365	19802.5	0.0062	19802.6	0.00427
19803.1	0.00406	19800.6	0.00382	19800.6	0.00381	19802.8	0.00606	19802.9	0.00425
19803.4	0.00375	19800.9	0.00375	19800.9	0.00383	19803.1	0.00613	19803.2	0.00423
19803.7	0.00374	19801.2	0.00359	19801.2	0.00366	19803.5	0.00608	19803.5	0.00421
19804	0.00322	19801.5	0.00311	19801.5	0.00366	19803.9	0.00607	19803.8	0.00419
19804.3	0.00347	19801.8	0.00314	19801.8	0.00369	19804.3	0.00595	19804.1	0.00417
19804.7	0.00412	19802.2	0.00355	19802.2	0.00335	19804.7	0.0059	19804.4	0.00415
19805	0.00361	19802.5	0.00312	19802.5	0.00365	19805.1	0.00591	19804.8	0.00412
19805.3	0.00335	19802.8	0.00368	19802.8	0.00351	19805.5	0.00587	19805.1	0.0041
19805.6	0.00329	19803.1	0.00349	19803.1	0.00364	19805.9	0.00579	19805.4	0.00408
19806	0.00374	19803.5	0.00279	19803.5	0.00375	19806.3	0.00577	19805.8	0.00405
19806.4	0.00351	19803.9	0.00292	19803.9	0.00358	19806.6	0.00566	19806.2	0.00403
19806.8	0.00319	19804.3	0.00329	19804.3	0.00363	19807	0.00574	19806.5	0.004
19807.2	0.0035	19804.7	0.00295	19804.7	0.0035	19807.4	0.00568	19807	0.00397
19807.6	0.00343	19805.1	0.00334	19805.1	0.00346	19807.8	0.00558	19807.3	0.00394
19808	0.00315	19805.5	0.00346	19805.5	0.00331	19808.2	0.00553	19807.8	0.0039
19808.4	0.00341	19805.9	0.00308	19805.9	0.00337	19808.5	0.00558	19808.1	0.00387
19808.8	0.00294	19806.3	0.00308	19806.3	0.00348	19809	0.00551	19808.5	0.00384
19809.1	0.0032	19806.6	0.00296	19806.6	0.00329	19809.4	0.00543	19808.9	0.00382
19809.5	0.00289	19807	0.00274	19807	0.0034	19809.8	0.00534	19809.3	0.00379
19809.9	0.00352	19807.4	0.0028	19807.4	0.00329	19810.1	0.00545	19809.7	0.00376
19810.3	0.00301	19807.8	0.00304	19807.8	0.00329	19810.5	0.00534	19810	0.00373
19810.7	0.00328	19808.2	0.00325	19808.2	0.00314	19810.9	0.00516	19810.4	0.0037
19811	0.00306	19808.5	0.0032	19808.5	0.00315	19811.3	0.00532	19810.8	0.00367
19811.5	0.00334	19809	0.00306	19809	0.00319	19811.6	0.00515	19811.2	0.00364
19811.9	0.00346	19809.4	0.00326	19809.4	0.00316	19812	0.00517	19811.6	0.00361
19812.3	0.00321	19809.8	0.00313	19809.8	0.00321	19812.3	0.00511	19812	0.00358
19812.6	0.00318	19810.1	0.0029	19810.1	0.00316	19812.7	0.00507	19812.4	0.00355
19813	0.00295	19810.5	0.00302	19810.5	0.0031	19813	0.00506	19812.8	0.00352
19813.4	0.00349	19810.9	0.00312	19810.9	0.00309	19813.4	0.00505	19813.2	0.00349
19813.8	0.00358	19811.3	0.00302	19811.3	0.00293	19813.7	0.00501	19813.5	0.00346
19814.1	0.00315	19811.6	0.0029	19811.6	0.00302	19814.1	0.005	19813.9	0.00343
19814.5	0.00289	19812	0.00305	19812	0.00317	19814.4	0.00483	19814.3	0.00341
19814.8	0.00278	19812.3	0.00295	19812.3	0.00303	19814.7	0.00489	19814.6	0.00338
19815.2	0.00275	19812.7	0.00274	19812.7	0.00279	19815.1	0.00494	19815	0.00335
19815.5	0.00318	19813	0.00281	19813	0.00296	19815.4	0.00489	19815.3	0.00333
19815.9	0.00288	19813.4	0.00256	19813.4	0.0031	19815.7	0.00494	19815.7	0.0033
19816.2	0.00308	19813.7	0.00298	19813.7	0.00274	19815.9	0.00495	19816	0.00327
19816.6	0.00277	19814.1	0.00315	19814.1	0.00287	19816.2	0.00488	19816.3	0.00325
19816.9	0.00309	19814.4	0.00273	19814.4	0.00288	19816.5	0.00482	19816.7	0.00322
19817.2	0.00301	19814.7	0.00308	19814.7	0.00295	19816.8	0.00483	19817	0.0032
19817.6	0.00303	19815.1	0.00295	19815.1	0.00299	19817.1	0.00473	19817.3	0.00317
19817.9	0.00284	19815.4	0.00314	19815.4	0.00283	19817.4	0.00466	19817.6	0.00315
19818.2	0.00281	19815.7	0.00277	19815.7	0.00285	19817.7	0.00463	19817.9	0.00313
19818.4	0.00293	19815.9	0.00267	19815.9	0.00281	19818	0.00467	19818.2	0.00311
19818.7	0.00298	19816.2	0.00269	19816.2	0.00279	19818.3	0.0046	19818.5	0.00309
19819	0.00252	19816.5	0.00261	19816.5	0.00285	19818.6	0.00465	19818.8	0.00307
19819.3	0.00241	19816.8	0.00262	19816.8	0.0029	19819	0.00463	19819.1	0.00305
19819.6	0.00293	19817.1	0.00245	19817.1	0.00284	19819.3	0.00457	19819.4	0.00303
19819.9	0.00282	19817.4	0.00232	19817.4	0.00271	19819.6	0.00454	19819.7	0.00301
19820.2	0.00267	19817.7	0.00252	19817.7	0.00267	19819.9	0.00461	19820	0.003
19820.5	0.0025	19818	0.00237	19818	0.00278	19820.2	0.00461	19820.3	0.00298
19820.8	0.00242	19818.3	0.00249	19818.3	0.00268	19820.6	0.00454	19820.6	0.00296
19821.1	0.00258	19818.6	0.00253	19818.6	0.00267	19820.9	0.00453	19820.9	0.00294
19821.5	0.00215	19819	0.00233	19819	0.00272	19821.3	0.00446	19821.2	0.00292
19821.8	0.00257	19819.3	0.00257	19819.3	0.00251	19821.7	0.00445	19821.6	0.0029
19822.1	0.00289	19819.6	0.0022	19819.6	0.00245	19822	0.00439	19821.9	0.00288
19822.4	0.00257	19819.9	0.00227	19819.9	0.00256	19822.4	0.00435	19822.2	0.00286
19822.7	0.00218	19820.2	0.00241	19820.2	0.00254	19822.8	0.0043	19822.5	0.00284
19823.1	0.00236	19820.6	0.00226	19820.6	0.00248	19823.3	0.00437	19822.8	0.00282
19823.4	0.00236	19820.9	0.00234	19820.9	0.00237	19823.6	0.00432	19823.2	0.0028
19823.8	0.0024	19821.3	0.00254	19821.3	0.00233	19824	0.00435	19823.6	0.00278
19824.2	0.00247	19821.7	0.0022	19821.7	0.00233	19824.4	0.00427	19823.9	0.00275
19824.5	0.00285	19822	0.00222	19822	0.00251	19824.8	0.00422	19824.3	0.00273
19824.9	0.00223	19822.4	0.00227	19822.4	0.00241	19825.2	0.00418	19824.7	0.0027
19825.3	0.00262	19822.8	0.00236	19822.8	0.00235	19825.5	0.00429	19825.1	0.00267
19825.8	0.00234	19823.3	0.00225	19823.3	0.00251	19825.9	0.00424	19825.5	0.00264
19826.1	0.00214	19823.6	0.00228	19823.6	0.00233	19826.3	0.00411	19825.9	0.00261
19826.5	0.0026	19824	0.00193	19824	0.00229	19826.7	0.00405	19826.3	0.00258
19826.9	0.00182	19824.4	0.00171	19824.4	0.00214	19827.1	0.00421	19826.7	0.00256
19827.3	0.00248	19824.8	0.002	19824.8	0.00219	19827.5	0.00408	19827.1	0.00253
19827.7	0.00224	19825.2	0.0022	19825.2	0.00223	19827.9	0.00398	19827.5	0.0025
19828	0.002	19825.5	0.00212	19825.5	0.00224	19828.3	0.00396	19827.8	0.00248
19828.4	0.00218	19825.9	0.00206	19825.9	0.0021	19828.7	0.00394	19828.2	0.00245
19828.8	0.00231	19826.3	0.00231	19826.3	0.0022	19829.1	0.00392	19828.6	0.00242
19829.2	0.00242	19826.7	0.00214	19826.7	0.00225	19829.4	0.00392	19829	0.00239
19829.6	0.0022	19827.1	0.00191	19827.1	0.00221	19829.8	0.00394	19829.4	0.00236
19830	0.00194	19827.5	0.00208	19827.5	0.00219	19830.1	0.00388	19829.8	0.00233
19830.4	0.00203	19827.9	0.00205	19827.9	0.00222	19830.5	0.0038	19830.2	0.0023
19830.8	0.00218	19828.3	0.00198	19828.3	0.00207	19830.8	0.00382	19830.6	0.00228
19831.2	0.00198	19828.7	0.00216	19828.7	0.00201	19831.2	0.00381	19831	0.00226
19831.6	0.00183	19829.1	0.00231	19829.1	0.00204	19831.5	0.00374	19831.3	0.00224
19831.9	0.00163	19829.4	0.00209	19829.4	0.002	19831.9	0.00377	19831.7	0.00222
19832.3	0.00185	19829.8	0.00207	19829.8	0.002	19832.2	0.00377	19832.1	0.0022
19832.6	0.00174	19830.1	0.0019	19830.1	0.00194	19832.5	0.00374	19832.4	0.00218
19833	0.00167	19830.5	0.00168	19830.5	0.00181	19832.8	0.00364	19832.8	0.00216
19833.3	0.00174	19830.8	0.00178	19830.8	0.00196	19833.2	0.00356	19833.1	0.00214
19833.7	0.002	19831.2	0.00213	19831.2	0.00173	19833.5	0.0036	19833.5	0.00213
19834	0.00188	19831.5	0.00164	19831.5	0.00182	19833.8	0.00353	19833.8	0.00211
19834.4	0.00173	19831.9	0.00166	19831.9	0.00191	19834.1	0.0035	19834.2	0.00209
19834.7	0.00158	19832.2	0.00174	19832.2	0.00202	19834.3	0.00354	19834.5	0.00207
19835	0.00232	19832.5	0.00145	19832.5	0.00189	19834.6	0.00353	19834.8	0.00205
19835.3	0.00205	19832.8	0.00172	19832.8	0.00179	19834.9	0.00345	19835.1	0.00203
19835.7	0.00166	19833.2	0.00189	19833.2	0.00192	19835.2	0.00345	19835.4	0.00202
19836	0.00186	19833.5	0.00172	19833.5	0.00174	19835.5	0.00348	19835.7	0.002
19836.3	0.00219	19833.8	0.00136	19833.8	0.00178	19835.9	0.00343	19836	0.00198
19836.6	0.00178	19834.1	0.00143	19834.1	0.00182	19836.2	0.00339	19836.3	0.00197
19836.8	0.00177	19834.3	0.00152	19834.3	0.0018	19836.5	0.00342	19836.6	0.00195
19837.1	0.00134	19834.6	0.00152	19834.6	0.00165	19836.8	0.00335	19836.9	0.00193
19837.4	0.00198	19834.9	0.0015	19834.9	0.0015	19837.1	0.0033	19837.2	0.00191
19837.7	0.00144	19835.2	0.00161	19835.2	0.00151	19837.4	0.00331	19837.5	0.00189
19838	0.0015	19835.5	0.00162	19835.5	0.00174	19837.7	0.00325	19837.8	0.00186
19838.4	0.00169	19835.9	0.00171	19835.9	0.00164	19838.1	0.00321	19838.1	0.00184
19838.7	0.00147	19836.2	0.00164	19836.2	0.00142	19838.4	0.00314	19838.4	0.00182
19839	0.00167	19836.5	0.00153	19836.5	0.0015	19838.8	0.00309	19838.8	0.0018
19839.3	0.00176	19836.8	0.00137	19836.8	0.00164	19839.1	0.00299	19839.1	0.00178
19839.6	0.00161	19837.1	0.00143	19837.1	0.00171	19839.5	0.00297	19839.4	0.00176
19839.9	0.00186	19837.4	0.00161	19837.4	0.00174	19839.9	0.00295	19839.7	0.00173
19840.2	0.00152	19837.7	0.00102	19837.7	0.00162	19840.3	0.00283	19840	0.00171
19840.6	0.00156	19838.1	0.00185	19838.1	0.00178	19840.7	0.00289	19840.4	0.00169
19840.9	0.00173	19838.4	0.0018	19838.4	0.00157	19841.1	0.00276	19840.7	0.00167
19841.3	0.00152	19838.8	0.00115	19838.8	0.0015	19841.5	0.00281	19841	0.00164
19841.6	0.00164	19839.1	0.00102	19839.1	0.00139	19841.9	0.00277	19841.4	0.00162
19842	0.00132	19839.5	0.00109	19839.5	0.00136	19842.3	0.00263	19841.8	0.00159
19842.4	0.00127	19839.9	0.00121	19839.9	0.00143	19842.6	0.00265	19842.2	0.00156
19842.8	0.00139	19840.3	0.00115	19840.3	0.00131	19843	0.00258	19842.6	0.00154
19843.2	0.00141	19840.7	0.00117	19840.7	0.00134	19843.4	0.00271	19843	0.00153
19843.6	0.00125	19841.1	0.00104	19841.1	0.00132	19843.8	0.00257	19843.4	0.00151
19844	0.00156	19841.5	0.00118	19841.5	0.00123	19844.2	0.0025	19843.8	0.00149
19844.4	0.00163	19841.9	0.00133	19841.9	0.0013	19844.6	0.00254	19844.2	0.00148
19844.8	0.00126	19842.3	0.0013	19842.3	0.00118	19845	0.00247	19844.6	0.00146
19845.1	0.00126	19842.6	0.00126	19842.6	0.00146	19845.4	0.00245	19845	0.00145
19845.5	0.00123	19843	0.00113	19843	0.00127	19845.8	0.00234	19845.3	0.00143
19845.9	0.00135	19843.4	0.00128	19843.4	0.00129	19846.2	0.00237	19845.7	0.00142
19846.3	0.00168	19843.8	0.00143	19843.8	0.0011	19846.6	0.00234	19846.1	0.0014
19846.7	0.00139	19844.2	0.0014	19844.2	0.0011	19846.9	0.0023	19846.5	0.00138
19847.1	0.00148	19844.6	0.0011	19844.6	0.00121	19847.3	0.00229	19846.9	0.00137
19847.5	0.00125	19845	0.00117	19845	0.0011	19847.7	0.00235	19847.3	0.00135
19847.9	0.000886923	19845.4	0.00136	19845.4	0.00103	19848	0.00219	19847.7	0.00133
19848.3	0.00113	19845.8	0.00127	19845.8	0.00107	19848.4	0.00219	19848.1	0.00132
19848.7	0.00135	19846.2	0.00124	19846.2	0.00115	19848.7	0.00219	19848.5	0.0013
19849.1	0.000875695	19846.6	0.00126	19846.6	0.00109	19849.1	0.00191	19848.9	0.00128
19849.4	0.000990977	19846.9	0.00112	19846.9	0.000910159	19849.4	0.00203	19849.3	0.00126
19849.8	0.00109	19847.3	0.000889016	19847.3	0.000985134	19849.8	0.00206	19849.6	0.00124
19850.2	0.00106	19847.7	0.00105	19847.7	0.00108	19850.1	0.00201	19850	0.00122
19850.5	0.00117	19848	0.00117	19848	0.00102	19850.4	0.00201	19850.3	0.0012
19850.9	0.00134	19848.4	0.000939534	19848.4	0.000954727	19850.7	0.00195	19850.7	0.00119
19851.2	0.00125	19848.7	0.000988262	19848.7	0.00105	19851.1	0.00193	19851	0.00117
19851.6	0.00105	19849.1	0.000975374	19849.1	0.00118	19851.4	0.00205	19851.4	0.00115
19851.9	0.00107	19849.4	0.000996401	19849.4	0.000955015	19851.6	0.00204	19851.7	0.00113
19852.3	0.00076689	19849.8	0.000832812	19849.8	0.000822688	19851.9	0.00198	19852.1	0.00111
19852.6	0.00105	19850.1	0.000676287	19850.1	0.000867754	19852.2	0.00193	19852.4	0.00109
19852.9	0.000909785	19850.4	0.00107	19850.4	0.000977596	19852.5	0.00198	19852.7	0.00108
19853.2	0.000867192	19850.7	0.000726729	19850.7	0.000963349	19852.8	0.00195	19853	0.00106
19853.6	0.00107	19851.1	0.000908265	19851.1	0.000771023	19853.1	0.00194	19853.4	0.00104
19853.9	0.000785534	19851.4	0.00072001	19851.4	0.000940607	19853.4	0.00192	19853.6	0.00103
19854.1	0.000619599	19851.6	0.000604802	19851.6	0.00111	19853.7	0.00186	19853.9	0.00101
19854.4	0.00060912	19851.9	0.000791623	19851.9	0.000899682	19854	0.00181	19854.2	0.000996967
19854.7	0.00063326	19852.2	0.000912273	19852.2	0.000714147	19854.4	0.00178	19854.5	0.000980801
19855	0.00082105	19852.5	0.000782532	19852.5	0.000637995	19854.7	0.00182	19854.8	0.000963984
19855.3	0.000783809	19852.8	0.000739019	19852.8	0.000636097	19855	0.00178	19855.1	0.000946167
19855.6	0.000986194	19853.1	0.000643239	19853.1	0.000756865	19855.3	0.00173	19855.4	0.000928291
19855.9	0.00105	19853.4	0.00062673	19853.4	0.000682213	19855.6	0.00177	19855.7	0.000910474
19856.2	0.000500644	19853.7	0.000584656	19853.7	0.00092083	19856	0.00179	19856	0.000891598
19856.5	0.000467445	19854	0.00078317	19854	0.000777385	19856.3	0.00165	19856.3	0.000873723
19856.9	0.000949883	19854.4	0.000650949	19854.4	0.000761321	19856.7	0.00175	19856.7	0.000854847
19857.2	0.00101	19854.7	0.000635753	19854.7	0.000638921	19857	0.00166	19857	0.000835972
19857.5	0.000909378	19855	0.00035127	19855	0.000626075	19857.4	0.00162	19857.3	0.000817037
19857.8	0.000520577	19855.3	0.000689422	19855.3	0.000680005	19857.8	0.0017	19857.6	0.00079922
19858.1	0.000781351	19855.6	0.000655217	19855.6	0.000595767	19858.2	0.00168	19857.9	0.000780286
19858.5	0.000920591	19856	0.000331981	19856	0.000716039	19858.6	0.00151	19858.2	0.00076141
19858.8	0.000546221	19856.3	0.000531549	19856.3	0.000713016	19859	0.00157	19858.6	0.000741476
19859.2	0.00050722	19856.7	0.000173288	19856.7	0.000747309	19859.4	0.00155	19858.9	0.000720484
19859.5	0.000453115	19857	0.000769818	19857	0.000655129	19859.8	0.00155	19859.3	0.000699433
19859.9	0.000529264	19857.4	0.000622082	19857.4	0.000538108	19860.2	0.00156	19859.7	0.000676382
19860.3	0.000285328	19857.8	0.000611281	19857.8	0.000402799	19860.5	0.00143	19860.1	0.000653273
19860.7	0.000387582	19858.2	0.000552442	19858.2	0.000488349	19860.9	0.00135	19860.5	0.000636837
19861.1	0.00037947	19858.6	0.000522805	19858.6	0.000465587	19861.3	0.00139	19860.9	0.000626856
19861.5	-2.63825e-05	19859	0.000494346	19859	0.000541496	19861.7	0.00141	19861.3	0.000617312
19861.9	0.000707516	19859.4	0.000287982	19859.4	0.000389548	19862.1	0.00139	19861.7	0.000607769
19862.3	0.000512026	19859.8	0.000452628	19859.8	0.000587562	19862.5	0.00136	19862.1	0.000598225
19862.7	0.000435184	19860.2	0.000376767	19860.2	0.000417064	19862.9	0.00133	19862.4	0.000589119
19863	0.000600556	19860.5	0.000334847	19860.5	0.000380055	19863.3	0.00137	19862.8	0.000579575
19863.4	0.000435284	19860.9	0.000623651	19860.9	0.000232582	19863.7	0.00128	19863.2	0.000570468
19863.8	0.000225589	19861.3	0.000491599	19861.3	0.000364543	19864.1	0.00128	19863.6	0.000561362
19864.2	0.000462706	19861.7	0.000458544	19861.7	0.000475179	19864.5	0.0013	19864	0.000551381
19864.6	-0.000213994	19862.1	0.000141331	19862.1	0.000398758	19864.8	0.00126	19864.4	0.000541837
19865	0.000235377	19862.5	1.43126e-05	19862.5	0.000408653	19865.2	0.00118	19864.8	0.000531856
19865.4	0.000706565	19862.9	0.000288342	19862.9	0.000293064	19865.5	0.00119	19865.2	0.000522313
19865.8	0.000384703	19863.3	0.000276788	19863.3	0.000301301	19865.9	0.00108	19865.6	0.000512332
19866.2	0.000370993	19863.7	0.000151972	19863.7	0.000358175	19866.2	0.00107	19866	0.000502788
19866.6	0.00024876	19864.1	0.000253834	19864.1	0.000343581	19866.6	0.00114	19866.4	0.000493657
19867	0.000166066	19864.5	0.000331179	19864.5	0.000452008	19866.9	0.00109	19866.7	0.000471264
19867.3	0.000510691	19864.8	0.000400397	19864.8	0.000389	19867.3	0.000880811	19867.1	0.000447444
19867.7	0.000489926	19865.2	0.00037913	19865.2	0.000376797	19867.6	0.00105	19867.5	0.000423557
19868	0.000472932	19865.5	0.000181501	19865.5	0.000242542	19868	0.00103	19867.8	0.000398536
19868.4	0.000470561	19865.9	1.84653e-05	19865.9	7.38154e-05	19868.3	0.00091214	19868.2	0.00037585
19868.8	0.000218751	19866.2	0.000348132	19866.2	0.000249529	19868.6	0.000932524	19868.5	0.000352029
19869.1	0.000485807	19866.6	0.000358453	19866.6	0.000487676	19868.9	0.000958778	19868.9	0.000328143
19869.4	0.000389939	19866.9	0.00032102	19866.9	9.69181e-05	19869.2	0.000892268	19869.2	0.000305523
19869.8	0.000450973	19867.3	0.000106922	19867.3	7.16825e-05	19869.5	0.000848918	19869.6	0.000281636
19870.1	0.000185034	19867.6	-1.74842e-05	19867.6	0.000173495	19869.8	0.000854973	19869.9	0.000260218
19870.5	5.9136e-06	19868	0.000254918	19868	8.77801e-05	19870.1	0.000866461	19870.3	0.000236331
19870.8	-9.64968e-05	19868.3	-3.52783e-05	19868.3	3.46528e-05	19870.4	0.000814258	19870.6	0.000214847
19871.1	8.66235e-05	19868.6	-6.09719e-05	19868.6	4.13278e-05	19870.7	0.000803578	19870.9	0.000194563
19871.4	0.000306121	19868.9	0.000223173	19868.9	7.9145e-05	19871	0.000870335	19871.2	0.000173078
19871.7	2.32468e-05	19869.2	0.000226843	19869.2	0.000288688	19871.3	0.000758246	19871.5	0.000152794
19872	2.8234e-05	19869.5	0.000422075	19869.5	0.000149414	19871.6	0.000736486	19871.8	0.000133711
19872.3	0.000486581	19869.8	2.06192e-05	19869.8	-1.37155e-05	19872	0.000779536	19872.1	0.000114628
19872.6	-6.11288e-05	19870.1	-4.08453e-05	19870.1	-2.71009e-05	19872.3	0.000601323	19872.4	9.52018e-05
19872.9	0.000116482	19870.4	-1.75527e-05	19870.4	9.35424e-06	19872.6	0.000667467	19872.7	8.47281e-05
19873.2	0.000201354	19870.7	0.000201778	19870.7	-0.000113461	19872.9	0.000624874	19873	7.42544e-05
19873.5	0.000319896	19871	7.74661e-05	19871	3.18811e-05	19873.2	0.000619212	19873.3	6.24623e-05
19873.8	-0.000170053	19871.3	-0.000105868	19871.3	4.59885e-05	19873.5	0.000532687	19873.6	5.13294e-05
19874.1	-0.000280661	19871.6	-4.13707e-05	19871.6	0.000136732	19873.9	0.000533445	19873.9	3.95374e-05
19874.5	-0.000100805	19872	-0.000380764	19872	1.53629e-05	19874.2	0.000577308	19874.2	2.77453e-05
19874.8	-6.01553e-05	19872.3	-2.26683e-05	19872.3	-0.000125099	19874.6	0.000405329	19874.6	1.59898e-05
19875.1	-0.000216793	19872.6	-9.27924e-05	19872.6	-0.000142698	19874.9	0.000414207	19874.9	4.82031e-06
19875.4	-0.00016024	19872.9	-0.000111534	19872.9	-9.1199e-05	19875.3	0.000436761	19875.2	-6.93514e-06
19875.7	-3.62212e-05	19873.2	-0.000409196	19873.2	-1.56259e-05	19875.7	0.000369076	19875.5	-1.81047e-05
19876	-0.0003834	19873.5	-0.000124509	19873.5	-0.000205021	19876.1	0.000292467	19875.8	-3.05193e-05
19876.4	-3.19473e-05	19873.9	-0.00029455	19873.9	-0.000245514	19876.5	0.000313168	19876.2	-4.23114e-05
19876.7	-0.000404713	19874.2	-0.00037907	19874.2	-4.67693e-05	19876.9	0.000322947	19876.5	-5.47626e-05
19877.1	-0.000467486	19874.6	0.000114912	19874.6	-8.86578e-05	19877.3	0.000390793	19876.9	-6.78731e-05
19877.4	-0.000204145	19874.9	-0.000314572	19874.9	-0.000360394	19877.7	0.00027707	19877.2	-8.16427e-05
19877.8	-3.22962e-05	19875.3	-0.000113014	19875.3	1.92863e-05	19878.1	0.00030194	19877.6	-9.53757e-05
19878.2	-0.00042847	19875.7	-0.00010743	19875.7	-0.000313054	19878.5	0.000252847	19878	-0.000109805
19878.6	-0.000325529	19876.1	-5.01621e-05	19876.1	-0.000119557	19878.8	7.89846e-05	19878.4	-0.000124908
19879	-0.000292213	19876.5	-0.000420674	19876.5	-0.000132198	19879.2	0.000145622	19878.8	-0.00014027
19879.4	-0.000252405	19876.9	-0.000607935	19876.9	-0.000104244	19879.6	0.000164806	19879.2	-0.000154997
19879.8	-0.000344807	19877.3	-0.000306243	19877.3	-0.000157432	19880	0.00017122	19879.6	-0.000169686
19880.2	-0.000431949	19877.7	4.60234e-05	19877.7	-0.000236181	19880.4	-1.46256e-05	19880	-0.00018374
19880.6	-0.000258161	19878.1	-2.09019e-05	19878.1	-1.33068e-07	19880.8	6.77098e-05	19880.4	-0.000197794
19881	-0.000224075	19878.5	-0.000215676	19878.5	-0.00011338	19881.3	2.77584e-05	19880.8	-0.000212521
19881.3	-8.96989e-06	19878.8	-0.000247439	19878.8	-0.00043088	19881.6	-7.6353e-05	19881.1	-0.000226537
19881.7	-0.000467656	19879.2	-0.000347589	19879.2	-0.000124475	19882	-5.50496e-05	19881.5	-0.000241264
19882.1	-0.000510913	19879.6	-0.000317338	19879.6	-0.000418451	19882.4	2.80309e-06	19881.9	-0.00025599
19882.5	-0.000170507	19880	-0.00024437	19880	-0.000356006	19882.8	8.15815e-06	19882.3	-0.00027139
19882.9	-0.000495546	19880.4	-0.000171986	19880.4	-0.000316613	19883.1	-0.000108711	19882.7	-0.000286752
19883.3	-0.000132692	19880.8	-8.31929e-05	19880.8	-0.000411652	19883.5	-0.00017486	19883.1	-0.000301478
19883.8	-0.00046956	19881.3	-0.000112484	19881.3	-0.000291624	19883.8	-0.000144042	19883.5	-0.000316878
19884.1	-0.00025426	19881.6	-8.82415e-05	19881.6	-0.000463875	19884.2	-0.000203573	19883.9	-0.000331604
19884.5	-0.000326887	19882	-0.000222979	19882	-0.000352658	19884.5	-0.000229205	19884.3	-0.000345658
19884.9	-0.000316943	19882.4	-0.000382202	19882.4	-0.000286041	19884.9	-0.000162883	19884.7	-0.000359416
19885.3	-0.000178808	19882.8	-5.37378e-05	19882.8	-0.000290894	19885.3	-0.000155965	19885	-0.000372006
19885.6	-0.000385088	19883.1	7.76299e-06	19883.1	-0.000373064	19885.6	-0.000201652	19885.4	-0.00038523
19886	-0.00041517	19883.5	-0.00026795	19883.5	-0.000729526	19885.9	-0.000153742	19885.8	-0.00039782
19886.3	-0.000417017	19883.8	-8.80194e-05	19883.8	-0.000437849	19886.3	-0.000225729	19886.1	-0.000410411
19886.7	-0.000210798	19884.2	-0.000207601	19884.2	-0.000513866	19886.6	-0.000255654	19886.5	-0.000423002
19887	-0.00028445	19884.5	-9.71039e-05	19884.5	-0.000475877	19886.9	-0.000258324	19886.8	-0.000434959
19887.4	-0.00063869	19884.9	-0.000335676	19884.9	-0.000326243	19887.2	-0.000278922	19887.2	-0.000446952
19887.8	-0.000313272	19885.3	-5.77189e-05	19885.3	-0.000433032	19887.5	-0.000363361	19887.5	-0.000459542
19888.1	-0.000432573	19885.6	-0.000156206	19885.6	-0.000401348	19887.8	-0.000274215	19887.9	-0.0004715
19888.4	-0.000236271	19885.9	-0.000282645	19885.9	-0.000339993	19888.1	-0.000222052	19888.2	-0.000483457
19888.8	-0.000483357	19886.3	-0.000576133	19886.3	-0.000356959	19888.3	-0.000238425	19888.5	-0.000494817
19889.1	-0.000277649	19886.6	-0.000153975	19886.6	-0.000325714	19888.7	-0.00032361	19888.9	-0.000506141
19889.4	-0.00075717	19886.9	-0.000396339	19886.9	-0.00048042	19889	-0.000250517	19889.2	-0.000516868
19889.7	3.90885e-05	19887.2	-0.00056063	19887.2	-0.000339993	19889.3	-0.000343943	19889.5	-0.000527559
19890	-0.000195428	19887.5	-0.000224666	19887.5	-0.000439991	19889.6	-0.000423402	19889.8	-0.000538286
19890.3	-0.000226717	19887.8	-0.000316937	19887.8	-0.000442029	19889.9	-0.000415021	19890	-0.000547711
19890.6	-0.000710632	19888.1	-0.000386182	19888.1	-0.000390396	19890.2	-0.000371644	19890.3	-0.000558437
19890.8	-0.00039507	19888.3	-0.000304919	19888.3	-0.000413917	19890.6	-0.000387456	19890.7	-0.000567649
19891.2	-0.000573184	19888.7	-0.000568552	19888.7	-0.00044064	19890.9	-0.000394052	19890.9	-0.000575162
19891.5	-0.000848342	19889	-0.000369611	19889	-0.000591062	19891.2	-0.000522141	19891.3	-0.000583592
19891.8	-0.00035093	19889.3	-0.00039824	19889.3	-0.000413098	19891.5	-0.000356898	19891.6	-0.000591576
19892.1	-0.000312327	19889.6	-0.00057645	19889.6	-0.000294813	19891.9	-0.000391443	19891.9	-0.000600032
19892.4	-0.000560188	19889.9	-0.000369305	19889.9	-0.000569603	19892.2	-0.000425363	19892.2	-0.000608462
19892.7	-0.000785682	19890.2	-0.000407398	19890.2	-0.000518784	19892.6	-0.000406064	19892.5	-0.000616918
19893.1	-0.000653135	19890.6	-0.000556525	19890.6	-0.000568944	19892.9	-0.000457643	19892.9	-0.000625347
19893.4	-0.000915974	19890.9	-0.000463114	19890.9	-0.00068495	19893.3	-0.000508632	19893.2	-0.000633332
19893.7	-0.000429258	19891.2	-0.000315506	19891.2	-0.000462752	19893.7	-0.000470055	19893.5	-0.000641762
19894	-0.000226396	19891.5	-0.000102713	19891.5	-0.000446528	19894.1	-0.00048292	19893.8	-0.000650689
19894.4	-0.00107	19891.9	-0.000703685	19891.9	-0.00057029	19894.5	-0.000519022	19894.1	-0.000659118
19894.7	-0.000327894	19892.2	-0.000612396	19892.2	-0.000534983	19894.9	-0.000566232	19894.5	-0.000668516
19895.1	-0.000746315	19892.6	-0.00068816	19892.6	-0.000547255	19895.3	-0.000596258	19894.9	-0.000677888
19895.4	-0.000610667	19892.9	-0.000768826	19892.9	-0.000779277	19895.7	-0.000588651	19895.2	-0.000687287
19895.8	-0.000684317	19893.3	-0.000583496	19893.3	-0.000456396	19896.1	-0.000570574	19895.6	-0.000698072
19896.2	-0.000679191	19893.7	-0.00071654	19893.7	-0.000443134	19896.5	-0.000523989	19896	-0.000708387
19896.6	-0.000991031	19894.1	-0.000634876	19894.1	-0.000600107	19896.9	-0.000534109	19896.4	-0.000718228
19897	-0.000858934	19894.5	-0.000749974	19894.5	-0.000642906	19897.3	-0.000539434	19896.8	-0.000717441
19897.4	-0.000863197	19894.9	-0.000752632	19894.9	-0.000774465	19897.7	-0.000657414	19897.2	-0.000716656
19897.8	-9.94478e-05	19895.3	-0.000333141	19895.3	-0.000508373	19898.1	-0.000586174	19897.6	-0.000715833
19898.2	-0.000491762	19895.7	-0.000357425	19895.7	-0.000499564	19898.5	-0.000424377	19898	-0.000715083
19898.6	-0.000772521	19896.1	-0.000625844	19896.1	-0.000643388	19898.9	-0.000706901	19898.4	-0.000714332
19899	-0.000957374	19896.5	-0.00064056	19896.5	-0.00068195	19899.3	-0.000536906	19898.8	-0.000713583
19899.4	-0.000838418	19896.9	-0.000904295	19896.9	-0.000443582	19899.7	-0.000542922	19899.2	-0.000712798
19899.8	-0.000588265	19897.3	-0.000587901	19897.3	-0.000674705	19900	-0.000625491	19899.6	-0.000712011
19900.2	-0.000493242	19897.7	-0.000549912	19897.7	-0.000641519	19900.4	-0.000623505	19900	-0.000711226
19900.6	-0.00045372	19898.1	-0.00051741	19898.1	-0.000440765	19900.8	-0.000666555	19900.3	-0.000710438
19901	-0.000423534	19898.5	-0.000349335	19898.5	-0.000731063	19901.1	-0.000616725	19900.8	-0.000709617
19901.4	-0.000544887	19898.9	-0.000471672	19898.9	-0.000797233	19901.5	-0.000664044	19901.2	-0.000708794
19901.8	-0.000429006	19899.3	-0.000534369	19899.3	-0.000803365	19901.8	-0.000652502	19901.6	-0.000708009
19902.2	-0.000757703	19899.7	-0.000535948	19899.7	-0.000600347	19902.2	-0.000637176	19902	-0.000707222
19902.5	-0.000743177	19900	-0.000449744	19900	-0.000701726	19902.5	-0.000759115	19902.3	-0.000706471
19902.9	-0.000293532	19900.4	-0.000484832	19900.4	-0.000427351	19902.9	-0.000676704	19902.7	-0.000708963
19903.3	-0.000941444	19900.8	-0.000666181	19900.8	-0.000447427	19903.2	-0.000622429	19903.1	-0.000716598
19903.6	-0.000341927	19901.1	-0.000625231	19901.1	-0.000551103	19903.6	-0.000724302	19903.4	-0.000724233
19904	-9.51478e-05	19901.5	-0.000527602	19901.5	-0.000510163	19903.9	-0.000809322	19903.8	-0.000731868
19904.3	-0.00064901	19901.8	-0.000473402	19901.8	-0.000524958	19904.3	-0.00080124	19904.2	-0.000739482
19904.7	-0.000476769	19902.2	-0.000595795	19902.2	-0.000683346	19904.6	-0.000762277	19904.5	-0.000747118
19905	-0.000407613	19902.5	-0.000614931	19902.5	-0.000770077	19904.9	-0.000798421	19904.9	-0.00075437
19905.4	-0.000679661	19902.9	-0.000474553	19902.9	-0.000752803	19905.2	-0.000834505	19905.2	-0.000762006
19905.7	-0.000329867	19903.2	-4.31455e-05	19903.2	-0.000754323	19905.5	-0.000790465	19905.6	-0.000769258
19906.1	-0.000632874	19903.6	-0.000619578	19903.6	-0.000711935	19905.8	-0.000772066	19905.9	-0.000776511
19906.4	-0.000516658	19903.9	-0.000269776	19903.9	-0.000340862	19906	-0.000853285	19906.2	-0.000783763
19906.8	-0.000717019	19904.3	-0.000470021	19904.3	-0.000526255	19906.4	-0.000798553	19906.6	-0.000790611
19907.1	-0.00067421	19904.6	-0.00052799	19904.6	-0.000602755	19906.7	-0.000806398	19906.9	-0.000797119
19907.4	-0.000283398	19904.9	-0.000391311	19904.9	-0.000613215	19907	-0.000858661	19907.2	-0.000803606
19907.7	-5.37517e-05	19905.2	-0.000641843	19905.2	-0.000652816	19907.3	-0.000803644	19907.5	-0.000810093
19908	-0.000445423	19905.5	-0.00046339	19905.5	-0.000721199	19907.6	-0.000850703	19907.8	-0.000816197
19908.3	-0.000836401	19905.8	-0.000342532	19905.8	-0.00069741	19907.9	-0.000916138	19908	-0.000822301
19908.5	-0.000765411	19906	-0.000427866	19906	-0.000429778	19908.2	-0.000929231	19908.4	-0.000828788
19908.9	-0.000222576	19906.4	-0.000730711	19906.4	-0.000544414	19908.5	-0.000845711	19908.6	-0.000828833
19909.2	-0.000654614	19906.7	-0.00064647	19906.7	-0.000541327	19908.9	-0.000916238	19908.9	-0.00082346
19909.5	-0.000907557	19907	-0.000678272	19907	-0.000505649	19909.2	-0.000937516	19909.2	-0.000818086
19909.8	-0.000711416	19907.3	-0.000894187	19907.3	-0.00053469	19909.5	-0.00104	19909.6	-0.000812696
19910.1	-0.000867503	19907.6	-0.000529011	19907.6	-0.000605593	19909.8	-0.000979407	19909.9	-0.000807005
19910.4	-0.000711235	19907.9	-0.000538536	19907.9	-0.000651469	19910.2	-0.000990087	19910.2	-0.000801315
19910.7	-0.000295225	19908.2	-0.000111941	19908.2	-0.000668789	19910.5	-0.001	19910.5	-0.000795624
19911	-0.000650719	19908.5	-0.000739589	19908.5	-0.000757426	19910.9	-0.00101	19910.8	-0.000790251
19911.4	-0.000748729	19908.9	-0.000380572	19908.9	-0.000538391	19911.3	-0.000955527	19911.2	-0.000784561
19911.7	-0.000225843	19909.2	-0.000819062	19909.2	-0.000579898	19911.7	-0.000937385	19911.5	-0.000778871
19912	-0.000294342	19909.5	-0.000599315	19909.5	-0.000560167	19912.1	-0.000950739	19911.8	-0.00077318
19912.3	-0.000539244	19909.8	-0.000513838	19909.8	-0.00049908	19912.5	-0.000956255	19912.1	-0.000767472
19912.7	-0.00027689	19910.2	-0.000479207	19910.2	-0.000649898	19912.9	-0.00102	19912.5	-0.000761148
19913	-0.000412085	19910.5	-0.000751127	19910.5	-0.000606832	19913.3	-0.000927829	19912.8	-0.000754823
19913.4	-0.000542654	19910.9	-0.000420076	19910.9	-0.000586576	19913.7	-0.00108	19913.2	-0.000748181
19913.8	-0.000229644	19911.3	-0.000514269	19911.3	-0.000633755	19914.1	-0.00095761	19913.6	-0.000741223
19914.2	-0.000266049	19911.7	-0.000265566	19911.7	-0.000353194	19914.5	-0.000974523	19914	-0.000734264
19914.6	-0.00024864	19912.1	-0.000735957	19912.1	-0.000642321	19914.9	-0.000985855	19914.4	-0.000726988
19915	-0.000514931	19912.5	-0.00074207	19912.5	-0.000514076	19915.3	-0.00105	19914.8	-0.000717329
19915.4	-0.000609875	19912.9	-0.000380885	19912.9	-0.000441391	19915.6	-0.00109	19915.2	-0.000705139
19915.8	-0.000472057	19913.3	-0.000297341	19913.3	-0.000378843	19916	-0.00118	19915.6	-0.000693481
19916.2	-0.000264155	19913.7	-0.000432967	19913.7	-0.000610029	19916.5	-0.000951082	19916	-0.000682354
19916.6	-0.000799729	19914.1	-0.000563538	19914.1	-0.000481346	19916.9	-0.000959011	19916.4	-0.000671197
19917	-9.73948e-05	19914.5	-0.000603102	19914.5	-0.000462855	19917.3	-0.00102	19916.8	-0.00066007
19917.4	-0.000345686	19914.9	-0.000600756	19914.9	-0.000414186	19917.6	-0.00111	19917.1	-0.000648412
19917.8	0.000112953	19915.3	-0.000460491	19915.3	-0.000452272	19918	-0.000980214	19917.6	-0.000636223
19918.1	-0.00050292	19915.6	-0.00027703	19915.6	-0.000454705	19918.4	-0.000947959	19917.9	-0.000625096
19918.5	-0.000611156	19916	-0.000540882	19916	-0.000420255	19918.8	-0.000987922	19918.4	-0.000612877
19919	-0.000657602	19916.5	-0.000618484	19916.5	-0.000404984	19919.1	-0.00095134	19918.7	-0.000601219
19919.4	-0.000442389	19916.9	-0.000289266	19916.9	-0.000370169	19919.5	-0.000974512	19919.2	-0.000589029
19919.8	-0.000720501	19917.3	-0.00030478	19917.3	-0.000281183	19919.9	-0.000971653	19919.6	-0.00057684
19920.1	-0.000394211	19917.6	-0.000208143	19917.6	-0.000382291	19920.2	-0.000994983	19920	-0.000565683
19920.5	-0.000401974	19918	-5.07098e-05	19918	-0.000259195	19920.6	-0.00094914	19920.3	-0.000554556
19920.9	-0.000183838	19918.4	-0.000177085	19918.4	-8.86065e-05	19920.9	-0.000909277	19920.7	-0.000543429
19921.3	-0.000732107	19918.8	-0.000384163	19918.8	-0.000255885	19921.2	-0.000861992	19921.1	-0.000531706
19921.6	-0.000436296	19919.1	-0.000444282	19919.1	-0.000198708	19921.6	-0.000744235	19921.4	-0.000517389
19922	-0.000165454	19919.5	-0.00042561	19919.5	-0.00013244	19921.9	-0.000855368	19921.8	-0.000504401
19922.4	-7.38027e-05	19919.9	-0.00030032	19919.9	-0.000253871	19922.3	-0.000821914	19922.1	-0.000490768
19922.7	-0.000244982	19920.2	-0.000189549	19920.2	-0.000316359	19922.6	-0.000898171	19922.5	-0.000477096
19923.1	0.000129175	19920.6	-0.000218198	19920.6	-0.000156971	19922.9	-0.000990056	19922.9	-0.000463463
19923.4	-0.000149246	19920.9	-0.000160772	19920.9	-7.58892e-05	19923.2	-0.000989038	19923.2	-0.00044983
19923.7	4.74047e-05	19921.2	-0.000196443	19921.2	-0.000125455	19923.5	-0.000857823	19923.5	-0.000437525
19924.1	9.53423e-05	19921.6	-0.000412783	19921.6	-2.47508e-05	19923.8	-0.000838758	19923.9	-0.000423854
19924.4	-0.000153461	19921.9	0.000107733	19921.9	-5.12395e-05	19924.1	-0.000802719	19924.2	-0.000410904
19924.8	8.60054e-05	19922.3	-0.000188577	19922.3	7.10198e-05	19924.4	-0.000794792	19924.6	-0.000399284
19925.1	-0.000254565	19922.6	-0.000210461	19922.6	9.20945e-06	19924.7	-0.000843444	19924.9	-0.000387017
19925.4	0.000266709	19922.9	-3.23405e-05	19922.9	-0.000222733	19925	-0.00073228	19925.2	-0.000375397
19925.7	6.39948e-05	19923.2	-0.000106552	19923.2	-4.55651e-05	19925.3	-0.000877124	19925.5	-0.00036446
19926	0.000627793	19923.5	-0.000319553	19923.5	-6.07526e-05	19925.6	-0.000814904	19925.8	-0.000353561
19926.3	0.000124912	19923.8	-0.000147819	19923.8	-0.000108769	19925.9	-0.000693916	19926.1	-0.00034194
19926.6	0.000244476	19924.1	4.86235e-05	19924.1	-2.79473e-05	19926.2	-0.000644759	19926.3	-0.000331041
19926.9	0.000207991	19924.4	4.36314e-05	19924.4	0.000129346	19926.6	-0.000731276	19926.7	-0.00031942
19927.2	3.44722e-05	19924.7	-2.84206e-05	19924.7	0.000121963	19926.9	-0.00078661	19927	-0.000302274
19927.5	0.000115997	19925	-0.000112108	19925	-3.87408e-05	19927.2	-0.000801779	19927.3	-0.000279658
19927.8	9.04159e-05	19925.3	0.000166121	19925.3	7.67e-05	19927.5	-0.000732191	19927.6	-0.000255785
19928.1	-0.000193962	19925.6	0.000487806	19925.6	0.000242778	19927.9	-0.000715816	19927.9	-0.000231839
19928.4	0.000161878	19925.9	0.000133619	19925.9	9.94834e-05	19928.2	-0.000685379	19928.2	-0.000209223
19928.7	0.000283978	19926.2	0.000241348	19926.2	0.00011119	19928.6	-0.000637091	19928.5	-0.00018535
19929.1	0.000321293	19926.6	0.000217251	19926.6	0.000205847	19929	-0.00060451	19928.9	-0.000161404
19929.4	2.36411e-05	19926.9	6.79527e-05	19926.9	3.46857e-05	19929.4	-0.000588084	19929.2	-0.000138788
19929.7	-0.000320473	19927.2	3.54717e-05	19927.2	0.000125543	19929.8	-0.000537356	19929.5	-0.000114841
19930	0.000129021	19927.5	0.000432233	19927.5	0.000168528	19930.2	-0.000509862	19929.8	-9.09687e-05
19930.4	0.000121113	19927.9	0.000340867	19927.9	0.000260722	19930.6	-0.000527254	19930.2	-6.56919e-05
19930.7	0.000473787	19928.2	0.000432795	19928.2	0.000208526	19931	-0.000484791	19930.5	-3.90847e-05
19931.1	-0.000237845	19928.6	0.000296344	19928.6	0.000225035	19931.4	-0.000493532	19930.9	-1.24775e-05
19931.5	-9.56052e-05	19929	0.000234694	19929	0.000392187	19931.8	-0.000463112	19931.3	1.67165e-05
19931.9	0.000476196	19929.4	0.000383193	19929.4	0.000215017	19932.2	-0.000454962	19931.7	4.46541e-05
19932.3	4.796e-06	19929.8	0.000166947	19929.8	0.000377143	19932.5	-0.000411357	19932.1	7.52523e-05
19932.7	0.000829195	19930.2	0.000125498	19930.2	0.000533408	19932.9	-0.000341242	19932.5	0.000105851
19933.1	0.000765608	19930.6	0.000456119	19930.6	0.000395784	19933.3	-0.000303963	19932.9	0.000136105
19933.5	0.000644586	19931	0.000551563	19931	0.000551304	19933.7	-0.00027663	19933.3	0.000178997
19933.9	0.000730551	19931.4	0.000611867	19931.4	0.000630649	19934.1	-0.000408645	19933.7	0.000218159
19934.3	0.000803723	19931.8	0.000830233	19931.8	0.000568741	19934.5	-0.00023037	19934.1	0.000259186
19934.7	0.000614847	19932.2	0.000662472	19932.2	0.000671036	19934.9	-0.00015941	19934.4	0.000298348
19935	0.000658332	19932.5	0.000591838	19932.5	0.000904819	19935.3	-0.000203994	19934.8	0.000337511
19935.4	0.00116	19932.9	0.000624241	19932.9	0.000935405	19935.7	-0.000155146	19935.2	0.000378538
19935.8	0.000691775	19933.3	0.00072087	19933.3	0.000715951	19936.1	-3.96864e-05	19935.6	0.000419565
19936.2	0.000950641	19933.7	0.000796824	19933.7	0.000845195	19936.5	-7.74723e-05	19936	0.000462457
19936.6	0.000750771	19934.1	0.000923916	19934.1	0.00117	19936.9	-4.70433e-05	19936.4	0.000505349
19937	0.000854953	19934.5	0.00104	19934.5	0.00102	19937.2	3.29465e-05	19936.8	0.000546376
19937.4	0.000991393	19934.9	0.00097322	19934.9	0.00123	19937.6	9.15618e-05	19937.3	0.000589164
19937.8	0.00131	19935.3	0.00121	19935.3	0.00126	19937.9	5.4829e-05	19937.6	0.000630295
19938.2	0.00092245	19935.7	0.00148	19935.7	0.00107	19938.3	4.16991e-05	19938	0.000671322
19938.6	0.00144	19936.1	0.00131	19936.1	0.00133	19938.7	0.000101995	19938.4	0.000710485
19939	0.000878296	19936.5	0.00116	19936.5	0.00132	19939	0.000135785	19938.8	0.000749647
19939.4	0.00127	19936.9	0.00117	19936.9	0.00139	19939.4	0.000305105	19939.2	0.000795258
19939.7	0.000974636	19937.2	0.00126	19937.2	0.00141	19939.7	0.000271283	19939.5	0.000854614
19940.1	0.00135	19937.6	0.00114	19937.6	0.00148	19940	0.000297936	19939.9	0.00091397
19940.4	0.00122	19937.9	0.00106	19937.9	0.00167	19940.4	0.00039542	19940.2	0.000973326
19940.8	0.00139	19938.3	0.00124	19938.3	0.00134	19940.7	0.00045902	19940.6	0.00103
19941.2	0.00149	19938.7	0.00148	19938.7	0.00153	19941	0.000416556	19941	0.00109
19941.5	0.00136	19939	0.00183	19939	0.00171	19941.3	0.000508958	19941.3	0.00115
19941.9	0.00184	19939.4	0.0016	19939.4	0.00189	19941.6	0.000542376	19941.6	0.0012
19942.2	0.00153	19939.7	0.00173	19939.7	0.00191	19941.9	0.000559163	19942	0.00126
19942.5	0.00153	19940	0.0018	19940	0.00169	19942.2	0.000620301	19942.3	0.00132
19942.9	0.00158	19940.4	0.00177	19940.4	0.00186	19942.5	0.000729871	19942.7	0.00137
19943.2	0.00194	19940.7	0.00165	19940.7	0.00191	19942.8	0.00076675	19943	0.00142
19943.5	0.00185	19941	0.00194	19941	0.00181	19943.1	0.000837243	19943.3	0.00148
19943.8	0.00163	19941.3	0.00199	19941.3	0.00186	19943.4	0.000862464	19943.6	0.00152
19944.1	0.00181	19941.6	0.00206	19941.6	0.00205	19943.7	0.000908869	19943.9	0.00157
19944.4	0.00215	19941.9	0.00212	19941.9	0.0023	19944	0.000936849	19944.2	0.00162
19944.7	0.00205	19942.2	0.0022	19942.2	0.00221	19944.4	0.000948835	19944.5	0.00167
19945	0.00207	19942.5	0.00208	19942.5	0.00222	19944.7	0.00114	19944.8	0.00172
19945.3	0.00225	19942.8	0.00216	19942.8	0.00227	19945	0.0012	19945.1	0.00178
19945.6	0.00211	19943.1	0.00209	19943.1	0.00236	19945.3	0.00127	19945.4	0.00185
19945.9	0.0021	19943.4	0.00234	19943.4	0.00238	19945.7	0.00123	19945.7	0.00193
19946.2	0.00219	19943.7	0.00194	19943.7	0.00246	19946	0.0014	19946	0.002
19946.5	0.00246	19944	0.00222	19944	0.00266	19946.4	0.00145	19946.3	0.00207
19946.9	0.00254	19944.4	0.00255	19944.4	0.0027	19946.7	0.0015	19946.7	0.00214
19947.2	0.00269	19944.7	0.00275	19944.7	0.00258	19947.1	0.00157	19947	0.00222
19947.5	0.00263	19945	0.00239	19945	0.00278	19947.5	0.00166	19947.3	0.00229
19947.8	0.00254	19945.3	0.00264	19945.3	0.0029	19948	0.00178	19947.6	0.00236
19948.2	0.00288	19945.7	0.00311	19945.7	0.00291	19948.3	0.00198	19948	0.00244
19948.5	0.00261	19946	0.0027	19946	0.00314	19948.7	0.00203	19948.3	0.00251
19948.9	0.00289	19946.4	0.00323	19946.4	0.00312	19949.2	0.00206	19948.7	0.0026
19949.2	0.00334	19946.7	0.00314	19946.7	0.00318	19949.6	0.00224	19949	0.00268
19949.6	0.00295	19947.1	0.00336	19947.1	0.0035	19949.9	0.00238	19949.4	0.00277
19950	0.0034	19947.5	0.00316	19947.5	0.00354	19950.3	0.00246	19949.8	0.00286
19950.5	0.00308	19948	0.00346	19948	0.00336	19950.7	0.00513	19950.3	0.00296
19950.8	0.00334	19948.3	0.00344	19948.3	0.00373	19951.1	0.00701	19950.7	0.00305
19951.2	0.00354	19948.7	0.0034	19948.7	0.00391	19951.5	-0.00448	19951.1	0.00315
19951.7	0.00346	19949.2	0.00358	19949.2	0.00407	19951.9	0.00291	19951.5	0.00327
19952.1	0.00378	19949.6	0.00368	19949.6	0.00424	19952.3	0.00312	19951.8	0.00339
19952.4	0.00392	19949.9	0.00387	19949.9	0.00445	19952.7	0.00323	19952.2	0.00352
19952.8	0.00408	19950.3	0.00394	19950.3	0.00448	19953.1	0.00341	19952.6	0.00364
19953.2	0.00389	19950.7	0.004	19950.7	0.00457	19953.5	0.00346	19953	0.00377
19953.6	0.00422	19951.1	0.00431	19951.1	0.00482	19953.9	0.00346	19953.4	0.00389
19954	0.00428	19951.5	0.00441	19951.5	0.00488	19954.3	0.00371	19953.8	0.00402
19954.4	0.00426	19951.9	0.0044	19951.9	0.00499	19954.7	0.00387	19954.2	0.00415
19954.8	0.00447	19952.3	0.00452	19952.3	0.00517	19955	0.00395	19954.6	0.00428
19955.2	0.0042	19952.7	0.00448	19952.7	0.00517	19955.4	0.00409	19955	0.00441
19955.6	0.00496	19953.1	0.00467	19953.1	0.00532	19955.7	0.00423	19955.4	0.00454
19956	0.00453	19953.5	0.0048	19953.5	0.00556	19956.1	0.00431	19955.8	0.00466
19956.4	0.00496	19953.9	0.00495	19953.9	0.00566	19956.5	0.00446	19956.2	0.00479
19956.8	0.00515	19954.3	0.0052	19954.3	0.00597	19956.8	0.00458	19956.6	0.00491
19957.2	0.00512	19954.7	0.00523	19954.7	0.00622	19957.2	0.00471	19957	0.00502
19957.5	0.00538	19955	0.00524	19955	0.00627	19957.5	0.00487	19957.3	0.00517
19957.9	0.00577	19955.4	0.00536	19955.4	0.00639	19957.9	0.005	19957.7	0.00534
19958.2	0.00516	19955.7	0.00559	19955.7	0.00663	19958.2	0.00526	19958	0.00552
19958.6	0.00604	19956.1	0.00586	19956.1	0.00675	19958.5	0.00531	19958.4	0.0057
19959	0.00602	19956.5	0.00585	19956.5	0.0069	19958.8	0.00547	19958.8	0.00587
19959.3	0.00598	19956.8	0.00567	19956.8	0.00697	19959.1	0.00561	19959.1	0.00606
19959.7	0.00622	19957.2	0.00605	19957.2	0.00723	19959.4	0.00574	19959.5	0.00622
19960	0.00622	19957.5	0.0061	19957.5	0.00728	19959.7	0.00588	19959.8	0.00639
19960.4	0.00619	19957.9	0.0064	19957.9	0.00739	19960	0.00602	19960.2	0.00656
19960.7	0.00681	19958.2	0.00643	19958.2	0.00748	19960.3	0.00614	19960.5	0.00672
19961	0.00703	19958.5	0.00651	19958.5	0.00761	19960.6	0.00623	19960.8	0.00688
19961.3	0.00687	19958.8	0.00675	19958.8	0.00786	19960.9	0.00639	19961.1	0.00704
19961.6	0.00724	19959.1	0.00681	19959.1	0.0082	19961.2	0.00661	19961.4	0.00719
19961.9	0.00764	19959.4	0.00658	19959.4	0.0083	19961.6	0.00674	19961.7	0.00733
19962.2	0.00759	19959.7	0.00702	19959.7	0.00852	19961.9	0.00697	19962	0.00749
19962.5	0.00787	19960	0.00759	19960	0.00868	19962.2	0.00708	19962.3	0.00767
19962.8	0.00799	19960.3	0.00766	19960.3	0.00879	19962.5	0.00729	19962.6	0.00783
19963.1	0.00834	19960.6	0.00784	19960.6	0.00888	19962.8	0.00747	19962.9	0.00801
19963.4	0.00818	19960.9	0.00778	19960.9	0.00909	19963.2	0.00757	19963.2	0.00818
19963.7	0.0086	19961.2	0.00785	19961.2	0.00948	19963.5	0.00786	19963.5	0.00837
19964.1	0.00854	19961.6	0.0082	19961.6	0.0098	19963.8	0.00799	19963.9	0.0086
19964.4	0.00945	19961.9	0.00872	19961.9	0.00998	19964.2	0.00835	19964.2	0.00892
19964.7	0.00956	19962.2	0.00871	19962.2	0.01013	19964.5	0.00852	19964.5	0.00907
19965	0.00933	19962.5	0.00907	19962.5	0.0105	19964.9	0.0087	19964.8	0.00915
19965.3	0.00999	19962.8	0.00927	19962.8	0.01068	19965.3	0.00899	19965.1	0.0094
19965.7	0.00952	19963.2	0.00944	19963.2	0.01118	19965.7	0.0092	19965.5	0.00967
19966	0.01009	19963.5	0.00966	19963.5	0.01129	19966.1	0.00955	19965.8	0.00994
19966.3	0.01059	19963.8	0.00955	19963.8	0.01164	19966.5	0.00989	19966.1	0.01027
19966.7	0.01059	19964.2	0.0099	19964.2	0.01205	19966.9	0.01022	19966.5	0.0105
19967	0.01087	19964.5	0.01068	19964.5	0.01243	19967.3	0.01051	19966.8	0.01064
19967.4	0.01102	19964.9	0.01073	19964.9	0.01288	19967.7	0.01082	19967.2	0.01106
19967.8	0.0113	19965.3	0.01119	19965.3	0.01337	19968.1	0.01126	19967.6	0.01164
19968.2	0.01183	19965.7	0.01138	19965.7	0.01386	19968.5	0.01143	19968	0.01175
19968.6	0.01237	19966.1	0.01179	19966.1	0.01447	19968.9	0.01198	19968.4	0.0123
19969	0.0128	19966.5	0.01194	19966.5	0.01478	19969.3	0.01241	19968.8	0.01258
19969.4	0.01299	19966.9	0.01224	19966.9	0.01525	19969.7	0.01282	19969.3	0.01294
19969.8	0.01341	19967.3	0.01263	19967.3	0.01603	19970.1	0.01332	19969.7	0.01352
19970.2	0.01335	19967.7	0.01288	19967.7	0.01648	19970.5	0.01369	19970	0.01369
19970.6	0.01393	19968.1	0.01335	19968.1	0.01714	19970.9	0.0142	19970.4	0.01414
19971	0.01403	19968.5	0.01356	19968.5	0.0175	19971.3	0.01477	19970.8	0.01446
19971.4	0.01439	19968.9	0.01391	19968.9	0.01808	19971.7	0.01523	19971.2	0.01491
19971.8	0.01526	19969.3	0.01459	19969.3	0.01859	19972.1	0.01577	19971.6	0.01526
19972.2	0.01583	19969.7	0.01475	19969.7	0.01946	19972.5	0.01638	19972	0.01571
19972.6	0.01572	19970.1	0.01505	19970.1	0.02012	19972.9	0.01699	19972.4	0.01645
19973	0.01639	19970.5	0.01548	19970.5	0.02038	19973.2	0.01749	19972.8	0.01716
19973.4	0.01645	19970.9	0.01566	19970.9	0.02094	19973.6	0.01819	19973.2	0.01769
19973.8	0.01718	19971.3	0.01606	19971.3	0.02173	19973.9	0.01878	19973.6	0.01816
19974.2	0.01753	19971.7	0.01677	19971.7	0.02244	19974.3	0.01926	19974	0.01862
19974.6	0.01822	19972.1	0.01728	19972.1	0.02322	19974.6	0.02014	19974.4	0.01938
19975	0.01911	19972.5	0.01764	19972.5	0.02378	19975	0.02091	19974.8	0.02003
19975.4	0.01932	19972.9	0.01816	19972.9	0.02454	19975.4	0.02148	19975.2	0.02075
19975.7	0.01993	19973.2	0.01864	19973.2	0.0253	19975.7	0.02225	19975.5	0.02141
19976.1	0.02065	19973.6	0.01903	19973.6	0.02613	19976.1	0.02335	19975.9	0.02209
19976.4	0.02117	19973.9	0.01951	19973.9	0.02694	19976.4	0.02413	19976.2	0.02284
19976.8	0.02203	19974.3	0.01994	19974.3	0.02789	19976.7	0.02509	19976.6	0.02345
19977.1	0.02259	19974.6	0.02048	19974.6	0.0287	19977	0.02599	19977	0.02416
19977.5	0.02318	19975	0.02137	19975	0.02964	19977.3	0.02706	19977.3	0.02513
19977.9	0.02447	19975.4	0.02211	19975.4	0.03064	19977.6	0.02801	19977.7	0.02605
19978.2	0.025	19975.7	0.02254	19975.7	0.03162	19977.9	0.0292	19978	0.02689
19978.6	0.02579	19976.1	0.02329	19976.1	0.03255	19978.2	0.03055	19978.3	0.0277
19978.9	0.02676	19976.4	0.02406	19976.4	0.03373	19978.5	0.03183	19978.7	0.02862
19979.2	0.02698	19976.7	0.02467	19976.7	0.03476	19978.8	0.0334	19979	0.02961
19979.5	0.02845	19977	0.02522	19977	0.03577	19979.1	0.035	19979.3	0.03081
19979.8	0.02964	19977.3	0.02607	19977.3	0.03688	19979.4	0.03675	19979.6	0.03196
19980.1	0.03045	19977.6	0.0271	19977.6	0.03805	19979.8	0.0387	19979.9	0.03304
19980.4	0.03148	19977.9	0.02773	19977.9	0.03947	19980.1	0.04085	19980.2	0.03416
19980.7	0.03312	19978.2	0.02848	19978.2	0.04094	19980.4	0.04314	19980.5	0.0357
19981	0.03445	19978.5	0.02935	19978.5	0.04223	19980.7	0.04551	19980.8	0.0371
19981.3	0.03595	19978.8	0.03061	19978.8	0.0444	19981	0.04822	19981.1	0.03842
19981.6	0.03726	19979.1	0.03146	19979.1	0.04606	19981.4	0.05111	19981.4	0.04003
19981.9	0.03861	19979.4	0.03266	19979.4	0.04788	19981.7	0.05433	19981.7	0.0417
19982.3	0.04059	19979.8	0.0343	19979.8	0.05016	19982	0.05809	19982.1	0.04377
19982.6	0.04236	19980.1	0.03521	19980.1	0.05259	19982.4	0.06258	19982.4	0.04581
19982.9	0.04445	19980.4	0.03693	19980.4	0.05507	19982.8	0.06746	19982.7	0.048
19983.2	0.0462	19980.7	0.03837	19980.7	0.05743	19983.2	0.07412	19983	0.05029
19983.5	0.04879	19981	0.04002	19981	0.06074	19983.6	0.08133	19983.3	0.05275
19983.9	0.05079	19981.4	0.0417	19981.4	0.06415	19984	0.09041	19983.7	0.05568
19984.2	0.05395	19981.7	0.04349	19981.7	0.06898	19984.4	0.10091	19984	0.05849
19984.5	0.05681	19982	0.0457	19982	0.07343	19984.8	0.11166	19984.3	0.06174
19984.9	0.06022	19982.4	0.04789	19982.4	0.08079	19985.2	0.12518	19984.7	0.06548
19985.3	0.06383	19982.8	0.05129	19982.8	0.08738	19985.6	0.1391	19985.1	0.06978
19985.7	0.06801	19983.2	0.05389	19983.2	0.09667	19986	0.1546	19985.5	0.07471
19986.1	0.07281	19983.6	0.05719	19983.6	0.10632	19986.4	0.17108	19985.9	0.07965
19986.5	0.07798	19984	0.06087	19984	0.1184	19986.8	0.18759	19986.3	0.08693
19986.9	0.08372	19984.4	0.06513	19984.4	0.13582	19987.2	0.20661	19986.7	0.0945
19987.3	0.09143	19984.8	0.06929	19984.8	0.1509	19987.6	0.22407	19987.1	0.1034
19987.7	0.09883	19985.2	0.07403	19985.2	0.17241	19988	0.23991	19987.5	0.11472
19988.1	0.10772	19985.6	0.07884	19985.6	0.19346	19988.4	0.25784	19987.9	0.12516
19988.5	0.118	19986	0.08415	19986	0.21508	19988.8	0.27416	19988.3	0.13765
19988.9	0.12921	19986.4	0.08996	19986.4	0.23322	19989.2	0.28777	19988.7	0.15268
19989.3	0.14175	19986.8	0.09639	19986.8	0.25571	19989.6	0.30025	19989.1	0.16808
19989.7	0.156	19987.2	0.10413	19987.2	0.27641	19990	0.31231	19989.5	0.18647
19990.1	0.17259	19987.6	0.11171	19987.6	0.29631	19990.4	0.3226	19989.9	0.20596
19990.5	0.18863	19988	0.1194	19988	0.31482	19990.8	0.33201	19990.3	0.22827
19990.9	0.20756	19988.4	0.1279	19988.4	0.33306	19991.1	0.34043	19990.7	0.25345
19991.3	0.22858	19988.8	0.13628	19988.8	0.34988	19991.5	0.34812	19991.1	0.27904
19991.7	0.24857	19989.2	0.14417	19989.2	0.36728	19991.9	0.35427	19991.5	0.30684
19992.1	0.26938	19989.6	0.15253	19989.6	0.38235	19992.2	0.36062	19991.9	0.33227
19992.5	0.29236	19990	0.16074	19990	0.39995	19992.6	0.36599	19992.3	0.35669
19992.9	0.31302	19990.4	0.16819	19990.4	0.41626	19993	0.37059	19992.7	0.37754
19993.3	0.33244	19990.8	0.17627	19990.8	0.42931	19993.3	0.37417	19993.1	0.39517
19993.6	0.35039	19991.1	0.18434	19991.1	0.44297	19993.7	0.37752	19993.4	0.40819
19994	0.3659	19991.5	0.19255	19991.5	0.46004	19994	0.38022	19993.8	0.41753
19994.4	0.37697	19991.9	0.2004	19991.9	0.47361	19994.3	0.38229	19994.2	0.42194
19994.7	0.38525	19992.2	0.20963	19992.2	0.48877	19994.7	0.38409	19994.6	0.42215
19995.1	0.39048	19992.6	0.21818	19992.6	0.50204	19995	0.38574	19994.9	0.4188
19995.5	0.39194	19993	0.22788	19993	0.51454	19995.3	0.38747	19995.3	0.41221
19995.8	0.3906	19993.3	0.23708	19993.3	0.52838	19995.6	0.38918	19995.6	0.40379
19996.2	0.38661	19993.7	0.24848	19993.7	0.54006	19995.9	0.3914	19996	0.39465
19996.5	0.38122	19994	0.25945	19994	0.55311	19996.2	0.39404	19996.3	0.38544
19996.8	0.37518	19994.3	0.27102	19994.3	0.56769	19996.5	0.39758	19996.6	0.37782
19997.2	0.36874	19994.7	0.28444	19994.7	0.58263	19996.8	0.40191	19997	0.37236
19997.5	0.36303	19995	0.29799	19995	0.59588	19997.1	0.40694	19997.3	0.36873
19997.8	0.35985	19995.3	0.31319	19995.3	0.60846	19997.4	0.41382	19997.6	0.36725
19998.1	0.35737	19995.6	0.33042	19995.6	0.62118	19997.7	0.4218	19997.9	0.36817
19998.4	0.35846	19995.9	0.34842	19995.9	0.63682	19998.1	0.43135	19998.2	0.37124
19998.7	0.3612	19996.2	0.36784	19996.2	0.65217	19998.4	0.44011	19998.5	0.37677
19999	0.36583	19996.5	0.39036	19996.5	0.66809	19998.7	0.45076	19998.8	0.38376
19999.3	0.37449	19996.8	0.41708	19996.8	0.68425	19999	0.46447	19999.1	0.39382
19999.6	0.38464	19997.1	0.44303	19997.1	0.70182	19999.3	0.47829	19999.4	0.40552
19999.9	0.39725	19997.4	0.47031	19997.4	0.72415	19999.7	0.49259	19999.7	0.42027
20000.2	0.41235	19997.7	0.49859	19997.7	0.74425	20000	0.50786	20000	0.43562
20000.6	0.43048	19998.1	0.53051	19998.1	0.76577	20000.4	0.52633	20000.3	0.45457
20000.9	0.45022	19998.4	0.55751	19998.4	0.79147	20000.7	0.54636	20000.7	0.476
20001.2	0.47114	19998.7	0.58923	19998.7	0.81478	20001.1	0.56761	20001	0.49837
20001.5	0.49708	19999	0.6206	19999	0.83703	20001.5	0.59233	20001.3	0.52255
20001.8	0.52355	19999.3	0.65159	19999.3	0.86559	20001.9	0.61928	20001.6	0.54691
20002.2	0.54999	19999.7	0.68133	19999.7	0.88977	20002.3	0.64746	20002	0.57427
20002.5	0.58082	20000	0.71334	20000	0.91829	20002.8	0.67645	20002.3	0.60063
20002.9	0.61319	20000.4	0.75104	20000.4	0.94646	20003.2	0.70668	20002.7	0.63109
20003.2	0.64546	20000.7	0.78397	20000.7	0.96927	20003.6	0.73601	20003	0.66161
20003.6	0.67878	20001.1	0.82003	20001.1	0.99391	20003.9	0.76531	20003.4	0.69404
20004	0.71519	20001.5	0.8563	20001.5	1.01221	20004.3	0.79648	20003.8	0.7289
20004.4	0.74981	20001.9	0.88795	20001.9	1.02605	20004.7	0.82491	20004.2	0.76404
20004.8	0.78359	20002.3	0.91765	20002.3	1.03684	20005.1	0.85329	20004.6	0.79961
20005.3	0.82009	20002.8	0.94655	20002.8	1.0437	20005.5	0.88194	20005.1	0.83288
20005.7	0.85429	20003.2	0.97143	20003.2	1.04583	20005.9	0.90848	20005.5	0.86633
20006.1	0.88414	20003.6	0.99454	20003.6	1.04432	20006.3	0.93399	20005.9	0.89641
20006.4	0.91591	20003.9	1.01644	20003.9	1.04056	20006.7	0.9586	20006.2	0.92252
20006.8	0.9454	20004.3	1.03716	20004.3	1.0327	20007.2	0.98088	20006.6	0.94908
20007.2	0.96994	20004.7	1.05566	20004.7	1.02531	20007.6	1.00039	20007	0.97278
20007.6	0.99306	20005.1	1.07476	20005.1	1.01658	20008	1.01861	20007.4	0.99281
20008	1.01449	20005.5	1.0921	20005.5	1.00744	20008.3	1.03308	20007.8	1.01245
20008.4	1.03195	20005.9	1.10826	20005.9	0.99883	20008.7	1.0457	20008.2	1.0285
20008.8	1.04634	20006.3	1.12464	20006.3	0.99025	20009.1	1.05679	20008.6	1.04245
20009.2	1.05961	20006.7	1.14029	20006.7	0.98217	20009.5	1.06673	20009.1	1.05499
20009.7	1.0699	20007.2	1.15521	20007.2	0.97492	20009.8	1.0746	20009.5	1.06501
20010.1	1.079	20007.6	1.16862	20007.6	0.96881	20010.2	1.08178	20009.9	1.07349
20010.5	1.08734	20008	1.18272	20008	0.96425	20010.6	1.08758	20010.3	1.08026
20010.8	1.09414	20008.3	1.19579	20008.3	0.96084	20010.9	1.09207	20010.6	1.08583
20011.2	1.10097	20008.7	1.20741	20008.7	0.95849	20011.3	1.09619	20011	1.09058
20011.6	1.10675	20009.1	1.21838	20009.1	0.95744	20011.6	1.09927	20011.4	1.09469
20012	1.11265	20009.5	1.22918	20009.5	0.95757	20011.9	1.10154	20011.8	1.09811
20012.3	1.11791	20009.8	1.23805	20009.8	0.95876	20012.3	1.10351	20012.1	1.1012
20012.7	1.12348	20010.2	1.24487	20010.2	0.96066	20012.6	1.105	20012.5	1.10408
20013.1	1.12897	20010.6	1.25059	20010.6	0.96314	20012.9	1.10622	20012.9	1.10671
20013.4	1.13344	20010.9	1.25433	20010.9	0.96635	20013.3	1.10743	20013.2	1.10878
20013.8	1.13769	20011.3	1.25692	20011.3	0.96991	20013.5	1.1082	20013.6	1.11081
20014.1	1.14107	20011.6	1.25776	20011.6	0.97332	20013.9	1.10907	20013.9	1.11245
20014.4	1.14416	20011.9	1.25688	20011.9	0.97693	20014.1	1.10998	20014.3	1.11382
20014.8	1.14586	20012.3	1.25415	20012.3	0.98105	20014.5	1.11106	20014.6	1.1147
20015.1	1.1468	20012.6	1.25156	20012.6	0.98439	20014.7	1.1121	20014.9	1.11473
20015.4	1.14634	20012.9	1.24813	20012.9	0.98752	20015.1	1.11292	20015.3	1.11453
20015.8	1.14602	20013.3	1.2445	20013.3	0.99096	20015.4	1.11443	20015.6	1.1139
20016	1.14413	20013.5	1.24072	20013.5	0.99384	20015.7	1.11602	20015.8	1.11306
20016.4	1.14196	20013.9	1.23677	20013.9	0.99616	20016	1.11722	20016.2	1.11207
20016.6	1.13883	20014.1	1.23367	20014.1	0.99776	20016.4	1.11945	20016.4	1.11101
20017	1.13641	20014.5	1.23074	20014.5	1.0001	20016.7	1.12106	20016.7	1.10987
20017.2	1.13198	20014.7	1.22916	20014.7	1.00159	20017	1.12303	20017	1.10888
20017.6	1.12908	20015.1	1.22846	20015.1	1.00295	20017.3	1.12551	20017.4	1.10793
20017.9	1.12541	20015.4	1.22833	20015.4	1.00378	20017.6	1.12784	20017.7	1.10714
20018.2	1.12233	20015.7	1.229	20015.7	1.00421	20018	1.13003	20018	1.10689
20018.5	1.11918	20016	1.23148	20016	1.00451	20018.3	1.13258	20018.3	1.10711
20018.9	1.11661	20016.4	1.23474	20016.4	1.00482	20018.7	1.13535	20018.6	1.10753
20019.2	1.11462	20016.7	1.23839	20016.7	1.00467	20019.1	1.13805	20019	1.10815
20019.5	1.11315	20017	1.24138	20017	1.00444	20019.5	1.14127	20019.3	1.10944
20019.8	1.11265	20017.3	1.24731	20017.3	1.004	20019.9	1.1443	20019.6	1.11117
20020.1	1.1129	20017.6	1.25155	20017.6	1.00372	20020.3	1.14683	20020	1.11316
20020.5	1.11371	20018	1.25629	20018	1.00352	20020.7	1.14935	20020.3	1.11526
20020.8	1.11529	20018.3	1.26062	20018.3	1.00345	20021.1	1.15104	20020.6	1.11779
20021.2	1.11762	20018.7	1.26478	20018.7	1.00382	20021.5	1.15237	20021	1.12088
20021.6	1.12012	20019.1	1.26849	20019.1	1.00481	20021.9	1.15305	20021.4	1.12415
20022	1.12301	20019.5	1.27079	20019.5	1.00653	20022.3	1.15324	20021.8	1.12761
20022.4	1.12688	20019.9	1.27297	20019.9	1.00951	20022.7	1.15302	20022.2	1.13138
20022.8	1.13152	20020.3	1.27283	20020.3	1.01185	20023.1	1.15224	20022.6	1.13504
20023.2	1.13563	20020.7	1.27141	20020.7	1.01512	20023.5	1.15127	20023	1.13877
20023.6	1.14015	20021.1	1.26883	20021.1	1.01844	20023.9	1.14952	20023.4	1.14192
20024	1.1442	20021.5	1.26522	20021.5	1.02296	20024.3	1.14773	20023.8	1.14444
20024.4	1.14767	20021.9	1.26004	20021.9	1.027	20024.7	1.14589	20024.2	1.14678
20024.8	1.15143	20022.3	1.25339	20022.3	1.03164	20025.1	1.14348	20024.6	1.14805
20025.2	1.15378	20022.7	1.24499	20022.7	1.0365	20025.5	1.14122	20025	1.14905
20025.6	1.15579	20023.1	1.23527	20023.1	1.04017	20025.9	1.13873	20025.4	1.14954
20026	1.15792	20023.5	1.22424	20023.5	1.04457	20026.3	1.13684	20025.8	1.14926
20026.4	1.15869	20023.9	1.21115	20023.9	1.04857	20026.7	1.13432	20026.2	1.1482
20026.8	1.15843	20024.3	1.19807	20024.3	1.05224	20027.1	1.13234	20026.6	1.14681
20027.2	1.15718	20024.7	1.18448	20024.7	1.05598	20027.5	1.13005	20027	1.14407
20027.6	1.15516	20025.1	1.16941	20025.1	1.06042	20027.8	1.1275	20027.4	1.14114
20028	1.15283	20025.5	1.15551	20025.5	1.06398	20028.2	1.12535	20027.8	1.13745
20028.4	1.15125	20025.9	1.14148	20025.9	1.0681	20028.6	1.12307	20028.2	1.13373
20028.8	1.14754	20026.3	1.12854	20026.3	1.07188	20028.9	1.12107	20028.6	1.1296
20029.2	1.14409	20026.7	1.11545	20026.7	1.07568	20029.3	1.11903	20029	1.12553
20029.6	1.14012	20027.1	1.10209	20027.1	1.08036	20029.6	1.11727	20029.4	1.12127
20030	1.13554	20027.5	1.08962	20027.5	1.08447	20030	1.11566	20029.8	1.11713
20030.3	1.13109	20027.8	1.07686	20027.8	1.08873	20030.3	1.11393	20030.1	1.11305
20030.7	1.12658	20028.2	1.06592	20028.2	1.09278	20030.7	1.11263	20030.5	1.10929
20031.1	1.12241	20028.6	1.05429	20028.6	1.09667	20031	1.11123	20030.8	1.10578
20031.4	1.11825	20028.9	1.04417	20028.9	1.1	20031.3	1.11018	20031.2	1.10266
20031.8	1.11379	20029.3	1.03343	20029.3	1.10366	20031.6	1.10931	20031.6	1.0997
20032.1	1.10977	20029.6	1.02406	20029.6	1.10664	20031.9	1.10851	20031.9	1.09718
20032.5	1.10605	20030	1.0151	20030	1.1088	20032.2	1.10789	20032.3	1.09511
20032.8	1.10249	20030.3	1.00651	20030.3	1.11169	20032.5	1.10714	20032.6	1.09317
20033.2	1.0996	20030.7	0.99943	20030.7	1.1136	20032.8	1.10657	20033	1.0918
20033.5	1.09711	20031	0.99218	20031	1.11492	20033.1	1.10599	20033.3	1.09074
20033.8	1.09387	20031.3	0.98552	20031.3	1.11582	20033.4	1.10526	20033.6	1.08989
20034.1	1.09118	20031.6	0.97989	20031.6	1.11621	20033.7	1.10497	20033.9	1.08936
20034.4	1.08974	20031.9	0.97399	20031.9	1.11618	20034.1	1.10462	20034.2	1.08902
20034.7	1.0882	20032.2	0.96831	20032.2	1.11556	20034.4	1.10425	20034.5	1.08886
20035	1.08634	20032.5	0.96324	20032.5	1.11385	20034.7	1.10387	20034.8	1.08883
20035.3	1.08433	20032.8	0.95783	20032.8	1.11146	20035.1	1.10336	20035.1	1.08878
20035.6	1.08405	20033.1	0.95329	20033.1	1.10879	20035.4	1.10304	20035.4	1.08903
20035.9	1.08313	20033.4	0.94923	20033.4	1.10578	20035.7	1.1026	20035.7	1.08935
20036.2	1.08193	20033.7	0.94621	20033.7	1.10238	20036	1.10221	20036	1.08965
20036.6	1.08197	20034.1	0.9436	20034.1	1.09739	20036.4	1.10183	20036.4	1.08996
20036.9	1.08131	20034.4	0.94001	20034.4	1.09289	20036.7	1.10127	20036.7	1.09047
20037.2	1.08109	20034.7	0.93798	20034.7	1.08747	20037.1	1.10055	20037	1.09083
20037.6	1.08084	20035.1	0.93616	20035.1	1.08006	20037.5	1.09996	20037.4	1.09127
20037.9	1.08074	20035.4	0.9346	20035.4	1.07342	20037.9	1.09901	20037.7	1.09177
20038.2	1.08111	20035.7	0.93416	20035.7	1.06659	20038.3	1.09813	20038	1.09215
20038.5	1.08162	20036	0.93283	20036	1.05934	20038.7	1.097	20038.3	1.09244
20038.9	1.08139	20036.4	0.93271	20036.4	1.05212	20039.2	1.09566	20038.7	1.09267
20039.2	1.08183	20036.7	0.93222	20036.7	1.04472	20039.6	1.09441	20039	1.09287
20039.6	1.08171	20037.1	0.93234	20037.1	1.03703	20040	1.09302	20039.4	1.09312
20040	1.08189	20037.5	0.93217	20037.5	1.02915	20040.4	1.09166	20039.8	1.09293
20040.4	1.08214	20037.9	0.93272	20037.9	1.02242	20040.7	1.08955	20040.2	1.09281
20040.8	1.08208	20038.3	0.93322	20038.3	1.0169	20041.1	1.08777	20040.6	1.09258
20041.2	1.08186	20038.7	0.93413	20038.7	1.0116	20041.5	1.08565	20041.1	1.09159
20041.7	1.08126	20039.2	0.93525	20039.2	1.00657	20041.9	1.08326	20041.5	1.09095
20042.1	1.0806	20039.6	0.9363	20039.6	1.00216	20042.4	1.08069	20041.9	1.08996
20042.5	1.07985	20040	0.93722	20040	0.99902	20042.8	1.07791	20042.3	1.08821
20042.9	1.07865	20040.4	0.93847	20040.4	0.99658	20043.2	1.07527	20042.7	1.08683
20043.2	1.07762	20040.7	0.93979	20040.7	0.99378	20043.6	1.0726	20043.1	1.08498
20043.6	1.07609	20041.1	0.94097	20041.1	0.99252	20044	1.06987	20043.5	1.0827
20044	1.07439	20041.5	0.94226	20041.5	0.99175	20044.4	1.06701	20043.9	1.08049
20044.4	1.07264	20041.9	0.94389	20041.9	0.99154	20044.8	1.06401	20044.3	1.07819
20044.9	1.06939	20042.4	0.94502	20042.4	0.99085	20045.2	1.06103	20044.7	1.07537
20045.3	1.06735	20042.8	0.94589	20042.8	0.99088	20045.5	1.05815	20045.1	1.0724
20045.7	1.06505	20043.2	0.9469	20043.2	0.9915	20045.9	1.05507	20045.5	1.06955
20046.1	1.06222	20043.6	0.94809	20043.6	0.9921	20046.3	1.052	20045.9	1.06638
20046.5	1.05923	20044	0.94905	20044	0.99272	20046.6	1.04901	20046.3	1.0633
20046.9	1.05611	20044.4	0.94978	20044.4	0.99366	20047	1.04598	20046.7	1.0602
20047.3	1.05347	20044.8	0.95049	20044.8	0.99502	20047.4	1.04275	20047.1	1.05699
20047.7	1.0499	20045.2	0.95087	20045.2	0.99648	20047.7	1.03978	20047.5	1.05387
20048	1.04665	20045.5	0.95115	20045.5	0.99845	20048.1	1.03659	20047.9	1.05072
20048.4	1.04366	20045.9	0.95125	20045.9	1.00016	20048.4	1.03314	20048.2	1.04752
20048.8	1.04026	20046.3	0.95159	20046.3	1.00166	20048.8	1.02997	20048.6	1.04447
20049.1	1.037	20046.6	0.95121	20046.6	1.00369	20049.1	1.02734	20049	1.04169
20049.5	1.0342	20047	0.95093	20047	1.00498	20049.4	1.0246	20049.3	1.03885
20049.9	1.03075	20047.4	0.94995	20047.4	1.00738	20049.7	1.02186	20049.7	1.0359
20050.2	1.02749	20047.7	0.94983	20047.7	1.0092	20050	1.01972	20050	1.03263
20050.6	1.02431	20048.1	0.94881	20048.1	1.01127	20050.3	1.01703	20050.4	1.02956
20050.9	1.02162	20048.4	0.94804	20048.4	1.01278	20050.6	1.01476	20050.7	1.02658
20051.3	1.01769	20048.8	0.94725	20048.8	1.01429	20050.9	1.01231	20051.1	1.02363
20051.6	1.01472	20049.1	0.94598	20049.1	1.01573	20051.2	1.01025	20051.4	1.02113
20051.9	1.01145	20049.4	0.94534	20049.4	1.01719	20051.5	1.00779	20051.7	1.01835
20052.2	1.00908	20049.7	0.9438	20049.7	1.01826	20051.9	1.00565	20052	1.01545
20052.5	1.00579	20050	0.94251	20050	1.01982	20052.2	1.00362	20052.3	1.01269
20052.8	1.00278	20050.3	0.9414	20050.3	1.02093	20052.5	1.00152	20052.6	1.01061
20053.1	0.99999	20050.6	0.94059	20050.6	1.02171	20052.8	0.99957	20052.9	1.00778
20053.4	0.99775	20050.9	0.93948	20050.9	1.02236	20053.2	0.99775	20053.2	1.00506
20053.7	0.99492	20051.2	0.93869	20051.2	1.02283	20053.5	0.99592	20053.5	1.00287
20054	0.99282	20051.5	0.9381	20051.5	1.02373	20053.8	0.9943	20053.8	1.00049
20054.4	0.98998	20051.9	0.93763	20051.9	1.02377	20054.1	0.9927	20054.2	0.99796
20054.7	0.9877	20052.2	0.93728	20052.2	1.02377	20054.5	0.99111	20054.5	0.99558
20055	0.98597	20052.5	0.93717	20052.5	1.02406	20054.8	0.98965	20054.8	0.99339
20055.3	0.9835	20052.8	0.93722	20052.8	1.02383	20055.2	0.98837	20055.1	0.99137
20055.7	0.98183	20053.2	0.93763	20053.2	1.02353	20055.6	0.98684	20055.5	0.98935
20056	0.98031	20053.5	0.93777	20053.5	1.02315	20056	0.98575	20055.8	0.98734
20056.3	0.97826	20053.8	0.93851	20053.8	1.02263	20056.4	0.98471	20056.1	0.98534
20056.6	0.97747	20054.1	0.93923	20054.1	1.02218	20056.8	0.98405	20056.5	0.984
20057	0.97618	20054.5	0.94042	20054.5	1.02125	20057.2	0.98342	20056.8	0.98259
20057.3	0.97519	20054.8	0.94208	20054.8	1.02034	20057.6	0.983	20057.1	0.98118
20057.7	0.97428	20055.2	0.94327	20055.2	1.01858	20058	0.98266	20057.5	0.97962
20058.1	0.97316	20055.6	0.9449	20055.6	1.01735	20058.4	0.98266	20057.9	0.97806
20058.5	0.97246	20056	0.94714	20056	1.01597	20058.8	0.9826	20058.3	0.97706
20058.9	0.97226	20056.4	0.9491	20056.4	1.01406	20059.2	0.98283	20058.7	0.97635
20059.3	0.97216	20056.8	0.95105	20056.8	1.01291	20059.6	0.98315	20059.1	0.97567
20059.7	0.97164	20057.2	0.95321	20057.2	1.01134	20060	0.98343	20059.5	0.97496
20060.1	0.97179	20057.6	0.95522	20057.6	1.00947	20060.4	0.98365	20060	0.97447
20060.5	0.97253	20058	0.95729	20058	1.00787	20060.9	0.98445	20060.4	0.97474
20060.9	0.973	20058.4	0.95922	20058.4	1.0066	20061.3	0.98464	20060.8	0.97502
20061.3	0.97367	20058.8	0.96109	20058.8	1.00524	20061.7	0.98545	20061.2	0.97528
20061.7	0.97403	20059.2	0.96325	20059.2	1.00394	20062.1	0.98589	20061.6	0.97556
20062.1	0.97491	20059.6	0.96561	20059.6	1.00306	20062.5	0.98679	20062	0.97598
20062.5	0.97602	20060	0.96799	20060	1.00215	20062.9	0.98765	20062.3	0.97694
20062.9	0.9766	20060.4	0.97087	20060.4	1.00061	20063.3	0.98796	20062.8	0.97803
20063.4	0.9787	20060.9	0.97358	20060.9	1.00034	20063.6	0.98869	20063.2	0.97903
20063.8	0.97954	20061.3	0.97641	20061.3	1.00002	20064	0.98954	20063.6	0.98008
20064.2	0.98147	20061.7	0.97913	20061.7	0.99943	20064.4	0.99043	20064	0.98144
20064.6	0.98279	20062.1	0.98186	20062.1	0.99912	20064.7	0.99129	20064.4	0.98286
20065	0.98458	20062.5	0.98464	20062.5	0.99866	20065.1	0.9922	20064.8	0.98428
20065.4	0.98656	20062.9	0.98699	20062.9	0.99886	20065.5	0.99299	20065.2	0.98564
20065.8	0.98805	20063.3	0.98998	20063.3	0.99885	20065.8	0.99356	20065.6	0.98699
20066.1	0.98992	20063.6	0.99353	20063.6	0.99955	20066.2	0.99443	20066	0.98839
20066.5	0.99137	20064	0.99668	20064	1.00017	20066.5	0.99531	20066.3	0.98972
20066.9	0.99391	20064.4	0.9997	20064.4	1.00118	20066.9	0.99602	20066.7	0.99105
20067.2	0.99528	20064.7	1.00294	20064.7	1.00218	20067.2	0.99687	20067.1	0.99238
20067.6	0.99742	20065.1	1.00721	20065.1	1.00328	20067.5	0.99772	20067.4	0.99371
20068	0.999	20065.5	1.01042	20065.5	1.00449	20067.8	0.99801	20067.8	0.99497
20068.3	1.0016	20065.8	1.014	20065.8	1.00608	20068.1	0.99869	20068.1	0.99611
20068.7	1.00259	20066.2	1.01755	20066.2	1.00791	20068.4	0.99935	20068.5	0.99731
20069	1.0038	20066.5	1.02116	20066.5	1.00974	20068.8	1.00003	20068.8	0.99846
20069.4	1.00651	20066.9	1.02471	20066.9	1.01186	20069	1.00079	20069.2	0.9996
20069.7	1.00768	20067.2	1.029	20067.2	1.0142	20069.4	1.00134	20069.5	1.00063
20070	1.00887	20067.5	1.03195	20067.5	1.01633	20069.7	1.00178	20069.8	1.0015
20070.3	1.00999	20067.8	1.03539	20067.8	1.01904	20070	1.00232	20070.1	1.00238
20070.6	1.01224	20068.1	1.03914	20068.1	1.02147	20070.3	1.00313	20070.5	1.00326
20070.9	1.0133	20068.4	1.04303	20068.4	1.02373	20070.6	1.00368	20070.7	1.00408
20071.3	1.01412	20068.8	1.04597	20068.8	1.02617	20071	1.00429	20071.1	1.00496
20071.5	1.0153	20069	1.04994	20069	1.02847	20071.3	1.00484	20071.3	1.00573
20071.9	1.01591	20069.4	1.05376	20069.4	1.0317	20071.6	1.00539	20071.7	1.00643
20072.2	1.01607	20069.7	1.05738	20069.7	1.03487	20071.9	1.0058	20072	1.00712
20072.5	1.01743	20070	1.06066	20070	1.03718	20072.3	1.00616	20072.3	1.00786
20072.8	1.0174	20070.3	1.06459	20070.3	1.03974	20072.6	1.00701	20072.6	1.00859
20073.1	1.01823	20070.6	1.06698	20070.6	1.0425	20073	1.00749	20073	1.00933
20073.5	1.01774	20071	1.07012	20071	1.04579	20073.3	1.00802	20073.3	1.01
20073.8	1.01793	20071.3	1.07267	20071.3	1.04861	20073.7	1.0086	20073.6	1.01045
20074.1	1.01775	20071.6	1.07525	20071.6	1.05116	20074.1	1.00911	20073.9	1.01088
20074.4	1.01748	20071.9	1.07742	20071.9	1.05417	20074.5	1.00948	20074.3	1.01136
20074.8	1.01774	20072.3	1.07987	20072.3	1.05657	20074.9	1.01001	20074.6	1.01178
20075.1	1.01712	20072.6	1.08192	20072.6	1.05889	20075.3	1.01054	20074.9	1.01226
20075.5	1.01714	20073	1.08343	20073	1.06134	20075.8	1.01093	20075.3	1.01266
20075.8	1.01609	20073.3	1.08515	20073.3	1.06353	20076.2	1.0113	20075.6	1.01292
20076.2	1.01587	20073.7	1.08718	20073.7	1.06505	20076.6	1.0115	20076	1.0132
20076.6	1.01557	20074.1	1.08791	20074.1	1.06589	20077	1.01158	20076.4	1.01349
20077	1.0143	20074.5	1.08918	20074.5	1.06629	20077.3	1.01186	20076.8	1.0138
20077.4	1.01389	20074.9	1.09023	20074.9	1.06634	20077.8	1.01211	20077.3	1.01393
20077.8	1.01363	20075.3	1.09103	20075.3	1.06596	20078.2	1.01215	20077.7	1.01396
20078.3	1.01304	20075.8	1.09144	20075.8	1.0648	20078.6	1.01224	20078.1	1.014
20078.7	1.01236	20076.2	1.09177	20076.2	1.06301	20079	1.01228	20078.5	1.01403
20079.1	1.01199	20076.6	1.09238	20076.6	1.06153	20079.4	1.01229	20078.9	1.01399
20079.5	1.01107	20077	1.09251	20077	1.05847	20079.8	1.01225	20079.3	1.01375
20079.8	1.01094	20077.3	1.09239	20077.3	1.05604	20080.2	1.01215	20079.7	1.01351
20080.3	1.01044	20077.8	1.09222	20077.8	1.05283	20080.6	1.01206	20080.1	1.01326
20080.7	1.00925	20078.2	1.09217	20078.2	1.04954	20081	1.01207	20080.5	1.01301
20081.1	1.00929	20078.6	1.09228	20078.6	1.04698	20081.4	1.01195	20080.9	1.01274
20081.5	1.0089	20079	1.09208	20079	1.04334	20081.8	1.01188	20081.3	1.01229
20081.9	1.0086	20079.4	1.09169	20079.4	1.04003	20082.2	1.01183	20081.7	1.01185
20082.3	1.00841	20079.8	1.09124	20079.8	1.03629	20082.5	1.01172	20082.1	1.0114
20082.7	1.00858	20080.2	1.09062	20080.2	1.03313	20082.9	1.01151	20082.5	1.01097
20083.1	1.00784	20080.6	1.09029	20080.6	1.02973	20083.2	1.01131	20082.9	1.01055
20083.5	1.008	20081	1.09007	20081	1.02669	20083.6	1.01131	20083.3	1.01013
20083.9	1.00805	20081.4	1.08975	20081.4	1.02317	20084	1.01117	20083.7	1.00973
20084.3	1.00803	20081.8	1.08938	20081.8	1.02033	20084.3	1.01113	20084.1	1.00934
20084.7	1.00815	20082.2	1.08886	20082.2	1.01707	20084.7	1.01095	20084.5	1.00896
20085	1.00831	20082.5	1.08846	20082.5	1.01459	20085	1.01077	20084.8	1.00863
20085.4	1.0084	20082.9	1.08804	20082.9	1.012	20085.4	1.01091	20085.2	1.00836
20085.8	1.00811	20083.2	1.0875	20083.2	1.00935	20085.7	1.0108	20085.6	1.00809
20086.1	1.00867	20083.6	1.08718	20083.6	1.00713	20086	1.01124	20085.9	1.00783
20086.5	1.00835	20084	1.08647	20084	1.00528	20086.3	1.01099	20086.3	1.00756
20086.8	1.00905	20084.3	1.08574	20084.3	1.00327	20086.6	1.01107	20086.7	1.00741
20087.2	1.00891	20084.7	1.08528	20084.7	1.00192	20086.9	1.01124	20087	1.00733
20087.5	1.00935	20085	1.08527	20085	1.00083	20087.2	1.01125	20087.3	1.00726
20087.9	1.00917	20085.4	1.08471	20085.4	0.99994	20087.5	1.01151	20087.7	1.00719
20088.2	1.00935	20085.7	1.08427	20085.7	0.99881	20087.9	1.01167	20088	1.00712
20088.5	1.00967	20086	1.084	20086	0.99808	20088.2	1.01185	20088.3	1.00705
20088.8	1.00922	20086.3	1.08342	20086.3	0.99735	20088.5	1.01196	20088.6	1.00708
20089.1	1.0102	20086.6	1.08304	20086.6	0.99664	20088.8	1.01221	20088.9	1.00711
20089.4	1.0103	20086.9	1.08268	20086.9	0.99651	20089.2	1.01236	20089.2	1.00713
20089.7	1.01083	20087.2	1.08232	20087.2	0.99597	20089.5	1.01269	20089.5	1.00716
20090	1.01104	20087.5	1.08163	20087.5	0.99618	20089.8	1.0129	20089.8	1.00719
20090.4	1.01111	20087.9	1.08112	20087.9	0.99622	20090.1	1.01315	20090.2	1.00722
20090.7	1.01147	20088.2	1.08028	20088.2	0.99631	20090.5	1.01348	20090.5	1.00739
20091	1.01158	20088.5	1.08	20088.5	0.9967	20090.8	1.0138	20090.8	1.00761
20091.3	1.01234	20088.8	1.07862	20088.8	0.997	20091.2	1.01409	20091.1	1.00781
20091.7	1.01234	20089.2	1.07768	20089.2	0.99723	20091.5	1.01436	20091.5	1.00803
20092	1.01267	20089.5	1.07688	20089.5	0.99818	20091.9	1.01497	20091.8	1.00826
20092.3	1.01295	20089.8	1.07541	20089.8	0.99889	20092.3	1.01527	20092.1	1.00848
20092.6	1.01299	20090.1	1.07419	20090.1	0.99957	20092.7	1.01579	20092.4	1.00869
20093	1.01362	20090.5	1.07306	20090.5	1.00009	20093.1	1.01634	20092.8	1.00892
20093.3	1.01368	20090.8	1.07197	20090.8	1.00086	20093.5	1.01677	20093.1	1.00914
20093.7	1.01402	20091.2	1.06967	20091.2	1.00189	20094	1.01737	20093.5	1.00938
20094	1.01491	20091.5	1.06819	20091.5	1.00276	20094.4	1.0177	20093.8	1.00962
20094.4	1.01507	20091.9	1.06613	20091.9	1.00361	20094.8	1.01833	20094.2	1.00991
20094.8	1.01493	20092.3	1.06424	20092.3	1.00459	20095.2	1.01893	20094.6	1.01031
20095.2	1.01604	20092.7	1.06188	20092.7	1.00522	20095.6	1.01929	20095	1.01072
20095.6	1.01635	20093.1	1.05978	20093.1	1.00575	20096	1.01979	20095.4	1.01114
20096	1.01648	20093.5	1.0581	20093.5	1.00659	20096.4	1.02035	20095.9	1.01156
20096.5	1.01661	20094	1.05602	20094	1.00714	20096.8	1.02078	20096.3	1.01202
20096.9	1.0172	20094.4	1.05396	20094.4	1.00778	20097.2	1.02148	20096.7	1.01253
20097.3	1.01839	20094.8	1.05213	20094.8	1.00843	20097.6	1.02197	20097.1	1.01301
20097.7	1.01826	20095.2	1.04984	20095.2	1.0088	20098	1.02249	20097.5	1.0135
20098.1	1.0188	20095.6	1.04775	20095.6	1.0091	20098.4	1.02307	20097.9	1.01399
20098.5	1.01889	20096	1.0456	20096	1.00941	20098.8	1.02366	20098.3	1.01448
20098.9	1.01965	20096.4	1.04369	20096.4	1.00961	20099.3	1.02421	20098.7	1.01499
20099.3	1.02028	20096.8	1.04185	20096.8	1.01008	20099.6	1.02471	20099.1	1.0155
20099.7	1.02081	20097.2	1.03953	20097.2	1.0102	20100	1.02533	20099.5	1.01603
20100.1	1.02086	20097.6	1.03795	20097.6	1.01057	20100.4	1.02592	20099.9	1.01661
20100.5	1.02144	20098	1.03588	20098	1.01088	20100.8	1.02637	20100.3	1.01737
20100.9	1.02176	20098.4	1.03389	20098.4	1.0108	20101.1	1.02683	20100.8	1.01813
20101.3	1.02234	20098.8	1.03245	20098.8	1.01109	20101.5	1.0275	20101.2	1.01887
20101.8	1.0229	20099.3	1.03099	20099.3	1.0114	20101.9	1.02794	20101.6	1.01956
20102.1	1.02377	20099.6	1.0296	20099.6	1.01147	20102.2	1.02835	20101.9	1.02027
20102.5	1.02439	20100	1.02818	20100	1.01183	20102.6	1.02893	20102.3	1.02101
20102.9	1.02443	20100.4	1.02631	20100.4	1.01228	20102.9	1.02952	20102.7	1.02171
20103.3	1.02522	20100.8	1.02495	20100.8	1.01245	20103.3	1.02998	20103.1	1.02242
20103.6	1.02549	20101.1	1.02394	20101.1	1.0129	20103.6	1.0304	20103.4	1.02312
20104	1.02643	20101.5	1.02204	20101.5	1.01335	20103.9	1.03095	20103.8	1.02383
20104.4	1.02678	20101.9	1.02067	20101.9	1.01349	20104.3	1.03141	20104.2	1.02454
20104.7	1.02755	20102.2	1.0195	20102.2	1.01365	20104.6	1.03166	20104.5	1.02524
20105.1	1.02715	20102.6	1.01815	20102.6	1.01399	20104.9	1.03188	20104.9	1.02595
20105.4	1.02866	20102.9	1.01689	20102.9	1.01427	20105.2	1.03237	20105.2	1.02663
20105.8	1.02896	20103.3	1.01603	20103.3	1.01465	20105.5	1.03285	20105.6	1.02731
20106.1	1.03008	20103.6	1.0144	20103.6	1.01511	20105.8	1.03322	20105.9	1.02796
20106.4	1.02987	20103.9	1.01365	20103.9	1.01551	20106.1	1.03333	20106.2	1.02862
20106.8	1.0311	20104.3	1.01247	20104.3	1.01589	20106.4	1.03375	20106.6	1.02924
20107.1	1.03157	20104.6	1.01112	20104.6	1.01668	20106.7	1.03406	20106.9	1.02986
20107.4	1.03195	20104.9	1.01021	20104.9	1.01731	20107.1	1.03434	20107.2	1.03049
20107.7	1.03274	20105.2	1.00944	20105.2	1.01787	20107.4	1.03467	20107.5	1.031
20108	1.03334	20105.5	1.00813	20105.5	1.01862	20107.7	1.03503	20107.8	1.03142
20108.3	1.03426	20105.8	1.00723	20105.8	1.01943	20108	1.03531	20108.1	1.03187
20108.6	1.03403	20106.1	1.00629	20106.1	1.02019	20108.4	1.03557	20108.4	1.03232
20108.9	1.03499	20106.4	1.00511	20106.4	1.02077	20108.7	1.03589	20108.7	1.03279
20109.2	1.0359	20106.7	1.00407	20106.7	1.02195	20109	1.03616	20109	1.03324
20109.6	1.03622	20107.1	1.00337	20107.1	1.0233	20109.4	1.03639	20109.4	1.03368
20109.9	1.03623	20107.4	1.00183	20107.4	1.02395	20109.7	1.03673	20109.7	1.03399
20110.2	1.03687	20107.7	1.00144	20107.7	1.02535	20110.1	1.03692	20110	1.03431
20110.5	1.03805	20108	1.00053	20108	1.02667	20110.5	1.03716	20110.3	1.03463
20110.9	1.03804	20108.4	0.99962	20108.4	1.02765	20110.9	1.0373	20110.7	1.03494
20111.2	1.03834	20108.7	0.99883	20108.7	1.02911	20111.3	1.03756	20111	1.03526
20111.5	1.0389	20109	0.99788	20109	1.03052	20111.7	1.03761	20111.3	1.03547
20111.9	1.03892	20109.4	0.99785	20109.4	1.03222	20112.1	1.038	20111.7	1.03562
20112.2	1.03959	20109.7	0.99688	20109.7	1.03459	20112.6	1.03788	20112.1	1.03577
20112.6	1.03981	20110.1	0.99635	20110.1	1.03624	20113	1.03798	20112.4	1.03593
20113	1.03981	20110.5	0.99565	20110.5	1.03793	20113.4	1.0381	20112.8	1.0361
20113.4	1.03993	20110.9	0.995	20110.9	1.03976	20113.8	1.03805	20113.2	1.03624
20113.8	1.04032	20111.3	0.99477	20111.3	1.04157	20114.2	1.03813	20113.6	1.03627
20114.2	1.04103	20111.7	0.99399	20111.7	1.0435	20114.6	1.03807	20114.1	1.0363
20114.6	1.04041	20112.1	0.99341	20112.1	1.04496	20115	1.03814	20114.5	1.03633
20115.1	1.04061	20112.6	0.99312	20112.6	1.04643	20115.4	1.03804	20114.9	1.03636
20115.5	1.04043	20113	0.99258	20113	1.04765	20115.8	1.03805	20115.3	1.03636
20115.9	1.04011	20113.4	0.99192	20113.4	1.04906	20116.2	1.03785	20115.7	1.03628
20116.3	1.04094	20113.8	0.99154	20113.8	1.04972	20116.6	1.03785	20116.1	1.0362
20116.7	1.04041	20114.2	0.9913	20114.2	1.05067	20117.1	1.0375	20116.5	1.03613
20117.1	1.03998	20114.6	0.99108	20114.6	1.05094	20117.4	1.03743	20116.9	1.03605
20117.5	1.03998	20115	0.99062	20115	1.05175	20117.8	1.03718	20117.3	1.03588
20117.9	1.0394	20115.4	0.99022	20115.4	1.05222	20118.2	1.03684	20117.7	1.03568
20118.3	1.03894	20115.8	0.99002	20115.8	1.05209	20118.6	1.03678	20118.1	1.03548
20118.7	1.03887	20116.2	0.98979	20116.2	1.05179	20119	1.03635	20118.5	1.03528
20119.1	1.03832	20116.6	0.98946	20116.6	1.05198	20119.3	1.03607	20118.9	1.03503
20119.6	1.03792	20117.1	0.98874	20117.1	1.05172	20119.7	1.0357	20119.4	1.03465
20119.9	1.03722	20117.4	0.98854	20117.4	1.05113	20120.1	1.03516	20119.7	1.0343
20120.3	1.03606	20117.8	0.98854	20117.8	1.05029	20120.4	1.03497	20120.2	1.03394
20120.7	1.03588	20118.2	0.98815	20118.2	1.04961	20120.8	1.03433	20120.5	1.03361
20121.1	1.03529	20118.6	0.98766	20118.6	1.04898	20121.1	1.03407	20120.9	1.03321
20121.5	1.03477	20119	0.98752	20119	1.04829	20121.5	1.03358	20121.3	1.03277
20121.8	1.03388	20119.3	0.98754	20119.3	1.04723	20121.8	1.03293	20121.6	1.03232
20122.2	1.03286	20119.7	0.98747	20119.7	1.04588	20122.2	1.03267	20122	1.03185
20122.6	1.03237	20120.1	0.98729	20120.1	1.04497	20122.5	1.03216	20122.4	1.03143
20122.9	1.03137	20120.4	0.98734	20120.4	1.04379	20122.8	1.03178	20122.7	1.03097
20123.3	1.03048	20120.8	0.98727	20120.8	1.04249	20123.1	1.03141	20123.1	1.03032
20123.6	1.0303	20121.1	0.9866	20121.1	1.04162	20123.4	1.03099	20123.5	1.0297
20124	1.02846	20121.5	0.9864	20121.5	1.04055	20123.7	1.03059	20123.8	1.02905
20124.3	1.02808	20121.8	0.98713	20121.8	1.039	20124	1.03019	20124.2	1.02846
20124.7	1.02756	20122.2	0.98666	20122.2	1.03791	20124.3	1.02955	20124.5	1.02787
20125	1.02636	20122.5	0.98697	20122.5	1.03673	20124.7	1.02906	20124.8	1.02725
20125.3	1.02537	20122.8	0.98619	20122.8	1.03548	20125	1.02849	20125.1	1.02665
20125.6	1.02485	20123.1	0.98643	20123.1	1.03397	20125.3	1.02811	20125.4	1.02602
20125.9	1.02389	20123.4	0.98611	20123.4	1.03287	20125.6	1.02752	20125.7	1.02543
20126.2	1.02285	20123.7	0.98636	20123.7	1.03203	20126	1.02711	20126	1.02479
20126.5	1.02171	20124	0.98636	20124	1.03015	20126.3	1.02672	20126.3	1.02416
20126.8	1.02141	20124.3	0.98575	20124.3	1.02874	20126.6	1.02621	20126.6	1.02357
20127.2	1.0201	20124.7	0.9863	20124.7	1.02721	20127	1.0257	20127	1.02291
20127.5	1.01955	20125	0.98593	20125	1.02565	20127.3	1.02525	20127.3	1.02229
20127.8	1.01893	20125.3	0.98608	20125.3	1.0241	20127.6	1.02485	20127.6	1.02162
20128.1	1.01868	20125.6	0.98576	20125.6	1.02231	20128	1.02438	20127.9	1.02096
20128.5	1.01777	20126	0.98536	20126	1.02093	20128.4	1.02387	20128.3	1.0203
20128.8	1.01714	20126.3	0.98537	20126.3	1.01932	20128.7	1.02323	20128.6	1.01972
20129.1	1.01686	20126.6	0.98516	20126.6	1.01723	20129.2	1.02293	20128.9	1.01923
20129.5	1.01591	20127	0.98509	20127	1.01504	20129.6	1.02244	20129.3	1.0187
20129.8	1.01591	20127.3	0.98503	20127.3	1.01288	20130	1.02194	20129.6	1.01815
20130.1	1.01533	20127.6	0.98484	20127.6	1.0111	20130.4	1.02175	20129.9	1.01763
20130.5	1.01509	20128	0.98469	20128	1.00888	20130.8	1.02131	20130.3	1.01705
20130.9	1.01451	20128.4	0.98446	20128.4	1.00657	20131.2	1.02091	20130.7	1.01661
20131.2	1.01425	20128.7	0.98421	20128.7	1.00412	20131.6	1.0207	20131.1	1.01614
20131.7	1.01393	20129.2	0.9838	20129.2	1.00079	20132	1.02044	20131.5	1.01567
20132.1	1.01326	20129.6	0.98378	20129.6	0.9988	20132.4	1.0201	20131.9	1.0152
20132.5	1.013	20130	0.98368	20130	0.99678	20132.8	1.01987	20132.3	1.01469
20132.9	1.01267	20130.4	0.98319	20130.4	0.99451	20133.2	1.01975	20132.7	1.01423
20133.3	1.01301	20130.8	0.98315	20130.8	0.99196	20133.7	1.01939	20133.1	1.01381
20133.7	1.01279	20131.2	0.98301	20131.2	0.99059	20134.1	1.01906	20133.5	1.01356
20134.1	1.01235	20131.6	0.98295	20131.6	0.98887	20134.5	1.01888	20133.9	1.01333
20134.5	1.01253	20132	0.98315	20132	0.98695	20134.9	1.01874	20134.3	1.01308
20134.9	1.01275	20132.4	0.98299	20132.4	0.98591	20135.3	1.01838	20134.7	1.01283
20135.3	1.01224	20132.8	0.98266	20132.8	0.98458	20135.7	1.01836	20135.1	1.01259
20135.7	1.01204	20133.2	0.98262	20133.2	0.98394	20136.1	1.01817	20135.5	1.01234
20136.2	1.01208	20133.7	0.98255	20133.7	0.98311	20136.5	1.01816	20136	1.01222
20136.6	1.01281	20134.1	0.98254	20134.1	0.98245	20136.9	1.01793	20136.4	1.01214
20137	1.01188	20134.5	0.98253	20134.5	0.98201	20137.3	1.01762	20136.8	1.01206
20137.4	1.01203	20134.9	0.98249	20134.9	0.98132	20137.6	1.01751	20137.2	1.01199
20137.8	1.01195	20135.3	0.9825	20135.3	0.9813	20138	1.01735	20137.6	1.01191
20138.2	1.01232	20135.7	0.98251	20135.7	0.98075	20138.4	1.0172	20138	1.01183
20138.6	1.01199	20136.1	0.98273	20136.1	0.98059	20138.7	1.01718	20138.4	1.01181
20139	1.01211	20136.5	0.98299	20136.5	0.98018	20139.1	1.01716	20138.8	1.01183
20139.4	1.01239	20136.9	0.98314	20136.9	0.98027	20139.5	1.01711	20139.2	1.01186
20139.8	1.01232	20137.3	0.98367	20137.3	0.97955	20139.8	1.01699	20139.6	1.01188
20140.1	1.01232	20137.6	0.98419	20137.6	0.97947	20140.2	1.01677	20139.9	1.01191
20140.5	1.01285	20138	0.98437	20138	0.97937	20140.5	1.017	20140.3	1.01193
20140.9	1.0119	20138.4	0.98496	20138.4	0.97945	20140.8	1.0167	20140.7	1.01195
20141.2	1.01233	20138.7	0.98515	20138.7	0.97936	20141.1	1.01671	20141	1.01202
20141.6	1.01242	20139.1	0.9856	20139.1	0.97906	20141.5	1.01678	20141.4	1.01212
20142	1.01225	20139.5	0.98633	20139.5	0.97885	20141.8	1.01662	20141.8	1.01221
20142.3	1.01259	20139.8	0.98681	20139.8	0.97843	20142.1	1.01675	20142.1	1.0123
20142.7	1.0124	20140.2	0.98719	20140.2	0.97841	20142.4	1.01667	20142.5	1.01239
20143	1.01268	20140.5	0.98743	20140.5	0.9785	20142.7	1.01647	20142.8	1.01248
20143.3	1.01257	20140.8	0.98808	20140.8	0.97849	20143	1.01635	20143.1	1.01257
20143.6	1.0121	20141.1	0.98856	20141.1	0.97834	20143.3	1.01643	20143.5	1.01265
20144	1.01193	20141.5	0.98916	20141.5	0.9781	20143.6	1.01655	20143.7	1.01274
20144.3	1.01201	20141.8	0.98958	20141.8	0.97795	20144	1.01643	20144.1	1.01283
20144.6	1.01181	20142.1	0.99	20142.1	0.97786	20144.3	1.0164	20144.4	1.01291
20144.9	1.01207	20142.4	0.9903	20142.4	0.97776	20144.7	1.0164	20144.7	1.013
20145.2	1.01143	20142.7	0.99108	20142.7	0.97805	20145	1.01626	20145	1.01309
20145.5	1.01158	20143	0.99169	20143	0.97781	20145.3	1.0162	20145.3	1.01319
20145.8	1.01151	20143.3	0.99178	20143.3	0.97747	20145.7	1.01639	20145.6	1.01329
20146.1	1.01135	20143.6	0.99283	20143.6	0.97751	20146	1.01613	20146	1.01338
20146.5	1.0111	20144	0.99299	20144	0.97775	20146.3	1.01627	20146.3	1.01349
20146.8	1.01167	20144.3	0.99348	20144.3	0.97795	20146.7	1.01631	20146.6	1.01364
20147.2	1.01031	20144.7	0.99401	20144.7	0.97822	20147.1	1.01624	20146.9	1.0138
20147.5	1.01036	20145	0.9945	20145	0.97832	20147.5	1.01616	20147.3	1.01396
20147.8	1.01052	20145.3	0.99431	20145.3	0.97866	20148	1.01625	20147.6	1.0141
20148.2	1.01018	20145.7	0.99488	20145.7	0.97891	20148.4	1.01621	20148	1.01427
20148.5	1.0102	20146	0.9955	20146	0.97961	20148.8	1.01607	20148.3	1.01443
20148.8	1.00987	20146.3	0.99577	20146.3	0.98033	20149.2	1.01627	20148.7	1.01459
20149.2	1.0095	20146.7	0.99646	20146.7	0.98099	20149.6	1.01614	20149	1.01474
20149.6	1.00958	20147.1	0.99697	20147.1	0.98161	20150	1.01631	20149.4	1.01488
20150	1.0093	20147.5	0.99722	20147.5	0.98276	20150.4	1.01621	20149.8	1.01502
20150.5	1.00963	20148	0.99808	20148	0.98371	20150.8	1.01604	20150.2	1.01517
20150.9	1.00905	20148.4	0.99835	20148.4	0.98456	20151.2	1.01622	20150.7	1.01532
20151.3	1.00919	20148.8	0.99847	20148.8	0.98603	20151.6	1.01602	20151.1	1.01548
20151.7	1.00903	20149.2	0.99868	20149.2	0.98717	20152	1.01609	20151.5	1.01563
20152.1	1.00884	20149.6	0.99943	20149.6	0.98868	20152.5	1.0159	20151.9	1.01573
20152.5	1.00862	20150	0.99999	20150	0.98983	20152.9	1.0159	20152.3	1.01583
20152.9	1.00896	20150.4	1.00066	20150.4	0.99114	20153.3	1.01598	20152.7	1.01592
20153.3	1.00868	20150.8	1.00133	20150.8	0.99195	20153.7	1.01573	20153.1	1.01602
20153.7	1.00915	20151.2	1.00166	20151.2	0.99284	20154.1	1.01576	20153.5	1.01612
20154.1	1.00854	20151.6	1.00245	20151.6	0.99394	20154.5	1.01571	20153.9	1.01622
20154.5	1.00853	20152	1.00329	20152	0.99476	20154.9	1.0155	20154.3	1.01625
20155	1.00839	20152.5	1.00361	20152.5	0.9955	20155.3	1.01527	20154.8	1.01627
20155.4	1.00882	20152.9	1.00446	20152.9	0.99622	20155.6	1.0153	20155.2	1.01628
20155.8	1.00875	20153.3	1.00512	20153.3	0.9972	20156	1.015	20155.6	1.01629
20156.2	1.00932	20153.7	1.00567	20153.7	0.99787	20156.4	1.01498	20156	1.01631
20156.6	1.00871	20154.1	1.00641	20154.1	0.99865	20156.7	1.01481	20156.4	1.01632
20157	1.00915	20154.5	1.00728	20154.5	0.99949	20157.1	1.01447	20156.8	1.0163
20157.4	1.00869	20154.9	1.00815	20154.9	0.99997	20157.5	1.01427	20157.2	1.01624
20157.8	1.00897	20155.3	1.0087	20155.3	1.00053	20157.8	1.01405	20157.6	1.01619
20158.1	1.00864	20155.6	1.00942	20155.6	1.00124	20158.2	1.01379	20157.9	1.01613
20158.5	1.00856	20156	1.0105	20156	1.00184	20158.5	1.01359	20158.3	1.01608
20158.9	1.00922	20156.4	1.01116	20156.4	1.00222	20158.9	1.01352	20158.7	1.01603
20159.2	1.00905	20156.7	1.01202	20156.7	1.00269	20159.2	1.01315	20159.1	1.01597
20159.6	1.00863	20157.1	1.01282	20157.1	1.00339	20159.5	1.013	20159.4	1.01588
20160	1.00906	20157.5	1.01371	20157.5	1.00388	20159.8	1.01285	20159.8	1.01566
20160.3	1.00866	20157.8	1.01444	20157.8	1.00382	20160.1	1.01246	20160.1	1.01543
20160.7	1.00887	20158.2	1.01518	20158.2	1.00446	20160.4	1.01236	20160.5	1.01521
20161	1.00927	20158.5	1.01614	20158.5	1.00475	20160.7	1.01204	20160.8	1.01499
20161.4	1.00935	20158.9	1.0166	20158.9	1.00493	20161	1.01169	20161.2	1.01478
20161.7	1.00855	20159.2	1.01766	20159.2	1.00517	20161.3	1.01154	20161.5	1.01459
20162	1.0086	20159.5	1.01874	20159.5	1.00554	20161.7	1.01122	20161.8	1.01439
20162.3	1.00876	20159.8	1.01905	20159.8	1.00594	20162	1.0108	20162.1	1.01419
20162.6	1.00891	20160.1	1.02019	20160.1	1.00638	20162.3	1.01051	20162.4	1.0139
20162.9	1.00828	20160.4	1.02059	20160.4	1.00611	20162.6	1.01036	20162.7	1.01362
20163.2	1.00851	20160.7	1.02114	20160.7	1.00618	20163	1.00994	20163	1.01331
20163.5	1.00832	20161	1.02236	20161	1.00638	20163.3	1.00961	20163.3	1.01301
20163.8	1.00825	20161.3	1.02294	20161.3	1.00633	20163.6	1.00932	20163.6	1.0127
20164.2	1.00785	20161.7	1.02336	20161.7	1.00634	20164	1.00898	20164	1.01238
20164.5	1.00782	20162	1.02389	20162	1.00603	20164.3	1.00866	20164.3	1.01207
20164.8	1.00763	20162.3	1.02493	20162.3	1.00598	20164.7	1.00838	20164.6	1.01175
20165.1	1.00785	20162.6	1.02571	20162.6	1.00591	20165	1.00797	20164.9	1.01143
20165.5	1.00743	20163	1.02622	20163	1.0059	20165.4	1.00777	20165.3	1.01111
20165.8	1.0074	20163.3	1.02651	20163.3	1.00563	20165.8	1.00735	20165.6	1.01079
20166.1	1.00738	20163.6	1.02818	20163.6	1.00564	20166.2	1.00707	20165.9	1.01048
20166.5	1.00736	20164	1.02736	20164	1.00505	20166.7	1.00673	20166.3	1.01016
20166.8	1.00671	20164.3	1.02831	20164.3	1.00482	20167.1	1.00647	20166.6	1.00983
20167.2	1.00679	20164.7	1.02876	20164.7	1.00486	20167.5	1.00619	20167	1.00949
20167.5	1.00685	20165	1.02917	20165	1.00461	20167.9	1.00572	20167.3	1.00916
20167.9	1.00662	20165.4	1.02971	20165.4	1.00476	20168.3	1.00546	20167.7	1.00875
20168.3	1.00636	20165.8	1.02995	20165.8	1.0044	20168.7	1.00508	20168.1	1.00836
20168.7	1.00598	20166.2	1.02982	20166.2	1.00484	20169.1	1.00504	20168.5	1.00794
20169.2	1.00622	20166.7	1.03046	20166.7	1.00544	20169.5	1.00471	20168.9	1.00753
20169.6	1.00582	20167.1	1.03062	20167.1	1.00577	20169.9	1.00447	20169.4	1.00708
20170	1.00597	20167.5	1.03062	20167.5	1.0065	20170.3	1.00404	20169.8	1.00667
20170.4	1.00595	20167.9	1.03077	20167.9	1.0073	20170.7	1.00369	20170.2	1.00625
20170.8	1.00545	20168.3	1.03085	20168.3	1.00841	20171.1	1.0035	20170.6	1.00581
20171.2	1.00494	20168.7	1.03071	20168.7	1.00943	20171.6	1.00312	20171	1.00537
20171.6	1.00448	20169.1	1.03036	20169.1	1.01134	20172	1.00279	20171.4	1.00495
20172	1.00425	20169.5	1.0303	20169.5	1.01269	20172.4	1.0024	20171.8	1.0045
20172.4	1.0047	20169.9	1.03034	20169.9	1.01382	20172.8	1.00211	20172.2	1.00408
20172.8	1.00482	20170.3	1.03008	20170.3	1.01622	20173.1	1.00182	20172.6	1.00364
20173.2	1.00409	20170.7	1.02953	20170.7	1.01781	20173.5	1.00148	20173	1.00321
20173.6	1.00345	20171.1	1.02908	20171.1	1.01948	20173.9	1.00134	20173.4	1.0028
20174.1	1.00354	20171.6	1.02861	20171.6	1.02129	20174.3	1.00114	20173.9	1.00239
20174.5	1.00306	20172	1.02829	20172	1.02357	20174.6	1.00085	20174.3	1.00199
20174.9	1.00347	20172.4	1.02786	20172.4	1.02609	20175	1.00064	20174.7	1.0016
20175.3	1.00389	20172.8	1.02738	20172.8	1.02782	20175.4	1.00045	20175.1	1.00121
20175.6	1.00255	20173.1	1.02673	20173.1	1.03037	20175.7	1.00003	20175.4	1.00085
20176	1.00223	20173.5	1.02605	20173.5	1.03245	20176.1	0.99986	20175.8	1.00047
20176.4	1.00216	20173.9	1.02554	20173.9	1.03464	20176.4	0.99973	20176.2	1.0001
20176.8	1.00175	20174.3	1.02472	20174.3	1.03715	20176.8	0.99954	20176.6	0.99974
20177.1	1.00195	20174.6	1.02443	20174.6	1.03908	20177.1	0.9994	20176.9	0.99937
20177.5	1.00178	20175	1.02332	20175	1.04078	20177.5	0.99924	20177.3	0.99901
20177.9	1.00155	20175.4	1.02252	20175.4	1.04308	20177.8	0.9988	20177.7	0.99865
20178.2	1.00122	20175.7	1.02188	20175.7	1.04473	20178.1	0.99878	20178	0.9983
20178.6	1.00174	20176.1	1.02113	20176.1	1.04641	20178.4	0.99869	20178.4	0.99796
20178.9	1.00169	20176.4	1.02069	20176.4	1.0482	20178.7	0.99854	20178.8	0.99763
20179.3	1.00087	20176.8	1.01981	20176.8	1.04949	20179	0.99838	20179.1	0.99731
20179.6	1.00103	20177.1	1.01879	20177.1	1.05141	20179.3	0.99814	20179.4	0.997
20180	1.00133	20177.5	1.018	20177.5	1.05321	20179.6	0.99803	20179.8	0.99669
20180.3	1.0005	20177.8	1.01692	20177.8	1.05439	20179.9	0.99793	20180.1	0.9964
20180.6	1.00046	20178.1	1.01629	20178.1	1.05551	20180.2	0.99776	20180.4	0.99611
20180.9	1.00046	20178.4	1.01594	20178.4	1.05664	20180.6	0.99761	20180.7	0.99587
20181.2	1.00079	20178.7	1.01536	20178.7	1.05779	20180.9	0.99747	20181	0.99568
20181.5	1.00029	20179	1.01448	20179	1.05876	20181.2	0.99723	20181.3	0.99549
20181.8	1.00042	20179.3	1.01326	20179.3	1.05992	20181.6	0.99713	20181.6	0.99531
20182.1	0.99933	20179.6	1.01258	20179.6	1.06085	20181.9	0.99696	20181.9	0.9951
20182.4	0.99934	20179.9	1.01213	20179.9	1.06163	20182.2	0.99674	20182.2	0.99491
20182.7	0.99955	20180.2	1.01147	20180.2	1.06249	20182.6	0.99663	20182.6	0.99471
20183.1	0.99972	20180.6	1.01033	20180.6	1.06313	20182.9	0.9967	20182.9	0.99451
20183.4	0.99916	20180.9	1.00974	20180.9	1.06379	20183.3	0.99654	20183.2	0.99431
20183.7	0.99878	20181.2	1.00938	20181.2	1.06436	20183.6	0.99636	20183.5	0.99418
20184.1	0.99927	20181.6	1.00882	20181.6	1.06468	20184	0.99624	20183.9	0.99406
20184.4	0.99872	20181.9	1.00867	20181.9	1.065	20184.4	0.9962	20184.2	0.99393
20184.7	0.99905	20182.2	1.00783	20182.2	1.0649	20184.9	0.99612	20184.5	0.99381
20185.1	0.99873	20182.6	1.00738	20182.6	1.06436	20185.3	0.99607	20184.9	0.99367
20185.4	0.99832	20182.9	1.00667	20182.9	1.06446	20185.7	0.99589	20185.2	0.99353
20185.8	0.99806	20183.3	1.00602	20183.3	1.06419	20186.1	0.99595	20185.6	0.9934
20186.1	0.99777	20183.6	1.00577	20183.6	1.06295	20186.5	0.99586	20185.9	0.99328
20186.5	0.99799	20184	1.00595	20184	1.06192	20186.9	0.99565	20186.3	0.99325
20186.9	0.9981	20184.4	1.00566	20184.4	1.06089	20187.3	0.99578	20186.7	0.99321
20187.4	0.99758	20184.9	1.00531	20184.9	1.05929	20187.7	0.99575	20187.2	0.99318
20187.8	0.99733	20185.3	1.00532	20185.3	1.05776	20188.1	0.99581	20187.6	0.99315
20188.2	0.99731	20185.7	1.00512	20185.7	1.05569	20188.5	0.99589	20188	0.99311
20188.6	0.99717	20186.1	1.00452	20186.1	1.05325	20188.9	0.99567	20188.4	0.99308
20189	0.99706	20186.5	1.00419	20186.5	1.05136	20189.4	0.99546	20188.8	0.99308
20189.4	0.9965	20186.9	1.00458	20186.9	1.04903	20189.8	0.99565	20189.2	0.99317
20189.8	0.99677	20187.3	1.00449	20187.3	1.04653	20190.2	0.99575	20189.6	0.99327
20190.2	0.99643	20187.7	1.00393	20187.7	1.04368	20190.6	0.9959	20190	0.99336
20190.6	0.99653	20188.1	1.00417	20188.1	1.04123	20191	0.99582	20190.4	0.99346
20191	0.99662	20188.5	1.00439	20188.5	1.03885	20191.4	0.99589	20190.8	0.99356
20191.4	0.99605	20188.9	1.00433	20188.9	1.03623	20191.8	0.99606	20191.2	0.99366
20191.9	0.99585	20189.4	1.00408	20189.4	1.03349	20192.2	0.9958	20191.7	0.9938
20192.3	0.99664	20189.8	1.00414	20189.8	1.0308	20192.5	0.99603	20192.1	0.99396
20192.7	0.99551	20190.2	1.00413	20190.2	1.02809	20192.9	0.99609	20192.5	0.99411
20193.1	0.99585	20190.6	1.00433	20190.6	1.02536	20193.3	0.99639	20192.9	0.99426
20193.5	0.99575	20191	1.00444	20191	1.022	20193.7	0.99614	20193.3	0.99441
20193.9	0.99622	20191.4	1.00423	20191.4	1.01861	20194	0.99647	20193.7	0.99455
20194.3	0.99603	20191.8	1.00452	20191.8	1.01568	20194.4	0.99648	20194.1	0.99472
20194.7	0.99611	20192.2	1.00455	20192.2	1.01283	20194.8	0.99678	20194.5	0.99492
20195	0.99628	20192.5	1.00408	20192.5	1.01059	20195.1	0.99674	20194.9	0.99511
20195.4	0.99633	20192.9	1.00454	20192.9	1.00713	20195.5	0.99679	20195.2	0.9953
20195.8	0.99595	20193.3	1.00445	20193.3	1.00414	20195.8	0.99687	20195.6	0.9955
20196.2	0.99632	20193.7	1.00454	20193.7	1.00096	20196.1	0.99715	20196	0.99569
20196.5	0.99624	20194	1.00436	20194	0.99856	20196.4	0.99733	20196.3	0.99588
20196.9	0.99658	20194.4	1.00457	20194.4	0.99561	20196.7	0.99728	20196.7	0.99606
20197.3	0.99704	20194.8	1.00447	20194.8	0.993	20197	0.99741	20197.1	0.99622
20197.6	0.99674	20195.1	1.00447	20195.1	0.99045	20197.3	0.99757	20197.4	0.99637
20198	0.99732	20195.5	1.00453	20195.5	0.98775	20197.6	0.99757	20197.8	0.99651
20198.3	0.99673	20195.8	1.00425	20195.8	0.98528	20198	0.99774	20198.1	0.99666
20198.6	0.9974	20196.1	1.00479	20196.1	0.98282	20198.3	0.99797	20198.4	0.9968
20198.9	0.99736	20196.4	1.00421	20196.4	0.98057	20198.6	0.99804	20198.7	0.99693
20199.2	0.9979	20196.7	1.00415	20196.7	0.97798	20199	0.99809	20199	0.99706
20199.5	0.99834	20197	1.00393	20197	0.97539	20199.3	0.99816	20199.3	0.99721
20199.8	0.99831	20197.3	1.00389	20197.3	0.97281	20199.6	0.99835	20199.7	0.99739
20200.1	0.9988	20197.6	1.00383	20197.6	0.97049	20199.9	0.99836	20200	0.99756
20200.5	0.99882	20198	1.00362	20198	0.96847	20200.3	0.9985	20200.3	0.99774
20200.8	0.99869	20198.3	1.00358	20198.3	0.96611	20200.6	0.99868	20200.6	0.99792
20201.1	0.9987	20198.6	1.00373	20198.6	0.96405	20200.9	0.9988	20200.9	0.99812
20201.5	0.99955	20199	1.00346	20199	0.96129	20201.3	0.99885	20201.2	0.99831
20201.8	1.0005	20199.3	1.00353	20199.3	0.95888	20201.6	0.99893	20201.6	0.9985
20202.1	1.00065	20199.6	1.00309	20199.6	0.95702	20202	0.99925	20201.9	0.99868
20202.4	1.00074	20199.9	1.00332	20199.9	0.95533	20202.4	0.9992	20202.2	0.99882
20202.8	1.0015	20200.3	1.00327	20200.3	0.95338	20202.8	0.99941	20202.6	0.99897
20203.1	1.00131	20200.6	1.00313	20200.6	0.95118	20203.2	0.99956	20202.9	0.99911
20203.4	1.00189	20200.9	1.00274	20200.9	0.94914	20203.7	0.99963	20203.2	0.99925
20203.8	1.002	20201.3	1.00274	20201.3	0.94775	20204.1	0.99978	20203.6	0.9994
20204.1	1.00256	20201.6	1.00234	20201.6	0.94627	20204.5	0.9999	20204	0.99956
20204.5	1.00314	20202	1.00212	20202	0.94456	20204.9	0.99993	20204.3	0.99972
20204.9	1.00301	20202.4	1.00161	20202.4	0.94319	20205.3	1.0001	20204.7	0.99987
20205.3	1.00308	20202.8	1.00181	20202.8	0.94238	20205.7	1.00031	20205.1	0.99999
20205.7	1.00409	20203.2	1.00165	20203.2	0.94142	20206.1	1.00035	20205.6	1.00012
20206.2	1.0036	20203.7	1.00139	20203.7	0.94148	20206.5	1.0004	20206	1.00025
20206.6	1.00427	20204.1	1.00114	20204.1	0.9413	20206.9	1.00053	20206.4	1.00037
20207	1.00428	20204.5	1.00072	20204.5	0.94149	20207.4	1.00064	20206.8	1.0005
20207.4	1.00451	20204.9	1.0004	20204.9	0.94198	20207.8	1.00071	20207.2	1.00062
20207.8	1.00479	20205.3	1.00049	20205.3	0.94239	20208.2	1.00087	20207.6	1.00075
20208.2	1.00493	20205.7	1.00021	20205.7	0.94324	20208.6	1.00084	20208.1	1.00087
20208.6	1.00578	20206.1	0.99994	20206.1	0.94434	20209.1	1.001	20208.4	1.001
20209	1.00598	20206.5	1.00007	20206.5	0.94535	20209.5	1.00071	20208.9	1.00113
20209.4	1.00602	20206.9	0.99991	20206.9	0.94664	20209.9	1.00122	20209.3	1.00125
20209.9	1.00582	20207.4	0.99965	20207.4	0.94774	20210.2	1.00111	20209.7	1.00138
20210.3	1.0058	20207.8	0.99946	20207.8	0.94895	20210.6	1.00106	20210.1	1.00147
20210.7	1.00645	20208.2	0.9994	20208.2	0.9503	20211	1.00117	20210.5	1.00147
20211.1	1.00637	20208.6	0.99948	20208.6	0.95149	20211.4	1.00148	20211	1.00147
20211.6	1.00619	20209.1	0.99943	20209.1	0.95264	20211.8	1.00146	20211.4	1.00147
20212	1.0067	20209.5	0.99942	20209.5	0.95388	20212.1	1.00134	20211.8	1.00148
20212.4	1.00654	20209.9	0.99936	20209.9	0.95517	20212.5	1.00133	20212.2	1.00148
20212.7	1.00693	20210.2	0.99909	20210.2	0.95664	20212.9	1.00136	20212.6	1.00148
20213.1	1.00695	20210.6	0.99902	20210.6	0.95762	20213.2	1.00149	20212.9	1.00146
20213.5	1.00688	20211	0.99935	20211	0.95879	20213.6	1.00176	20213.3	1.00142
20213.9	1.00678	20211.4	0.99965	20211.4	0.95966	20213.9	1.00163	20213.7	1.00138
20214.3	1.00702	20211.8	0.99979	20211.8	0.96055	20214.3	1.00147	20214.1	1.00135
20214.6	1.00668	20212.1	0.99958	20212.1	0.96156	20214.6	1.00155	20214.4	1.00131
20215	1.00674	20212.5	0.99948	20212.5	0.96241	20214.9	1.00165	20214.8	1.00128
20215.4	1.00637	20212.9	0.99959	20212.9	0.96314	20215.2	1.0017	20215.2	1.00124
20215.7	1.00652	20213.2	1	20213.2	0.96374	20215.5	1.0016	20215.5	1.00117
20216.1	1.00688	20213.6	0.99978	20213.6	0.96411	20215.8	1.00166	20215.9	1.00105
20216.4	1.00608	20213.9	0.99989	20213.9	0.96469	20216.1	1.00159	20216.2	1.00094
20216.8	1.00646	20214.3	1.00004	20214.3	0.96529	20216.5	1.00171	20216.6	1.00082
20217.1	1.00594	20214.6	1.00008	20214.6	0.9656	20216.8	1.00175	20216.9	1.00071
20217.4	1.00509	20214.9	0.99984	20214.9	0.96591	20217.1	1.00155	20217.2	1.0006
20217.7	1.00586	20215.2	1.00049	20215.2	0.9663	20217.4	1.00173	20217.5	1.0005
20218	1.00536	20215.5	1.00008	20215.5	0.96667	20217.8	1.0015	20217.8	1.0004
20218.3	1.00567	20215.8	1.00023	20215.8	0.96715	20218.1	1.00163	20218.1	1.00031
20218.6	1.0046	20216.1	1.00022	20216.1	0.96724	20218.4	1.00144	20218.4	1.00023
20219	1.00463	20216.5	0.99946	20216.5	0.96767	20218.8	1.00161	20218.8	1.00016
20219.3	1.00482	20216.8	1.00011	20216.8	0.96797	20219.1	1.00167	20219.1	1.00008
20219.6	1.00397	20217.1	1.00011	20217.1	0.96795	20219.4	1.00157	20219.4	1
20219.9	1.00423	20217.4	0.99938	20217.4	0.96814	20219.8	1.00141	20219.7	0.99992
20220.3	1.00353	20217.8	0.99953	20217.8	0.96861	20220.2	1.00141	20220.1	0.99983
20220.6	1.00321	20218.1	0.99916	20218.1	0.96888	20220.5	1.00127	20220.4	0.99975
20220.9	1.00301	20218.4	0.99879	20218.4	0.96905	20220.9	1.00135	20220.7	0.99966
20221.3	1.00316	20218.8	0.99839	20218.8	0.96895	20221.3	1.00144	20221.1	0.99954
20221.6	1.00229	20219.1	0.99841	20219.1	0.96927	20221.7	1.00132	20221.4	0.99943
20221.9	1.00226	20219.4	0.99794	20219.4	0.96958	20222.2	1.00122	20221.7	0.99932
20222.3	1.00204	20219.8	0.9976	20219.8	0.96986	20222.6	1.00099	20222.1	0.9992
20222.7	1.0017	20220.2	0.9971	20220.2	0.97017	20223	1.00089	20222.5	0.99907
20223	1.00099	20220.5	0.99675	20220.5	0.97031	20223.4	1.00114	20222.8	0.99895
20223.4	1.00118	20220.9	0.99625	20220.9	0.97099	20223.8	1.0009	20223.2	0.99882
20223.8	1.00075	20221.3	0.99541	20221.3	0.97161	20224.2	1.00092	20223.6	0.99864
20224.2	1.00042	20221.7	0.99529	20221.7	0.97231	20224.7	1.00071	20224	0.99846
20224.7	1	20222.2	0.99468	20222.2	0.97304	20225	1.00057	20224.5	0.99827
20225.1	1.00008	20222.6	0.99429	20222.6	0.97365	20225.5	1.00052	20224.9	0.9981
20225.5	1.00003	20223	0.99354	20223	0.97475	20225.9	1.00039	20225.3	0.99792
20225.9	0.99965	20223.4	0.99306	20223.4	0.97547	20226.3	1.00022	20225.8	0.99773
20226.3	0.99936	20223.8	0.9929	20223.8	0.97659	20226.7	1.00006	20226.1	0.99758
20226.7	0.99903	20224.2	0.99242	20224.2	0.97785	20227.2	0.99994	20226.6	0.99744
20227.2	0.99842	20224.7	0.99201	20224.7	0.97876	20227.6	0.99986	20227	0.9973
20227.5	0.99868	20225	0.99151	20225	0.97948	20228	0.99955	20227.3	0.99716
20228	0.99795	20225.5	0.99103	20225.5	0.98039	20228.4	0.99943	20227.8	0.99702
20228.4	0.99791	20225.9	0.99074	20225.9	0.98145	20228.8	0.99951	20228.2	0.99687
20228.8	0.99787	20226.3	0.99045	20226.3	0.98275	20229.2	0.99931	20228.6	0.99672
20229.2	0.99764	20226.7	0.99016	20226.7	0.98388	20229.5	0.99921	20229.1	0.99656
20229.7	0.99704	20227.2	0.98965	20227.2	0.98475	20229.9	0.99883	20229.5	0.99642
20230.1	0.9972	20227.6	0.98926	20227.6	0.98581	20230.3	0.99888	20229.9	0.99626
20230.5	0.99653	20228	0.98905	20228	0.98729	20230.7	0.99881	20230.3	0.99612
20230.9	0.99615	20228.4	0.98851	20228.4	0.98822	20231	0.99869	20230.7	0.99598
20231.3	0.99595	20228.8	0.98821	20228.8	0.98945	20231.4	0.99848	20231.1	0.99584
20231.7	0.99555	20229.2	0.9881	20229.2	0.99073	20231.8	0.99848	20231.5	0.99567
20232	0.99559	20229.5	0.98755	20229.5	0.99197	20232.1	0.99863	20231.9	0.99549
20232.4	0.99529	20229.9	0.98739	20229.9	0.99313	20232.5	0.99825	20232.2	0.99533
20232.8	0.99471	20230.3	0.98724	20230.3	0.9944	20232.8	0.99816	20232.6	0.99515
20233.2	0.99473	20230.7	0.9867	20230.7	0.99562	20233.1	0.99819	20233	0.99498
20233.5	0.99469	20231	0.98673	20231	0.99673	20233.5	0.99802	20233.3	0.99481
20233.9	0.99415	20231.4	0.98624	20231.4	0.99802	20233.8	0.99811	20233.7	0.99463
20234.3	0.99371	20231.8	0.9858	20231.8	0.9988	20234.1	0.99788	20234.1	0.99449
20234.6	0.99375	20232.1	0.98561	20232.1	1.00013	20234.4	0.99769	20234.4	0.99436
20235	0.99289	20232.5	0.98542	20232.5	1.00131	20234.7	0.9979	20234.8	0.99424
20235.3	0.99291	20232.8	0.98532	20232.8	1.00268	20235	0.99759	20235.1	0.99413
20235.6	0.99284	20233.1	0.98502	20233.1	1.00381	20235.3	0.99763	20235.5	0.994
20236	0.99196	20233.5	0.9852	20233.5	1.00474	20235.7	0.99755	20235.7	0.9939
20236.3	0.99211	20233.8	0.98494	20233.8	1.00589	20236	0.9977	20236.1	0.99379
20236.6	0.99212	20234.1	0.98421	20234.1	1.00746	20236.3	0.9975	20236.4	0.99368
20236.9	0.99106	20234.4	0.98387	20234.4	1.00829	20236.7	0.99746	20236.7	0.99358
20237.2	0.99104	20234.7	0.98389	20234.7	1.00939	20237	0.99754	20237	0.99353
20237.5	0.99108	20235	0.98346	20235	1.01037	20237.3	0.99752	20237.3	0.99347
20237.8	0.99081	20235.3	0.98283	20235.3	1.01145	20237.7	0.99748	20237.6	0.99342
20238.2	0.99038	20235.7	0.98303	20235.7	1.01285	20238	0.99751	20238	0.99336
20238.5	0.99038	20236	0.98249	20236	1.01375	20238.4	0.99735	20238.3	0.9933
20238.8	0.98987	20236.3	0.98202	20236.3	1.01484	20238.7	0.99756	20238.6	0.99324
20239.2	0.98977	20236.7	0.98181	20236.7	1.01599	20239.1	0.99746	20239	0.99318
20239.5	0.99007	20237	0.98143	20237	1.01711	20239.5	0.99745	20239.3	0.99312
20239.8	0.98979	20237.3	0.98137	20237.3	1.01839	20239.9	0.99754	20239.6	0.99306
20240.2	0.98957	20237.7	0.9811	20237.7	1.01937	20240.3	0.99738	20240	0.99302
20240.5	0.9895	20238	0.98088	20238	1.02032	20240.8	0.99747	20240.3	0.99302
20240.9	0.98946	20238.4	0.98056	20238.4	1.02145	20241.2	0.99769	20240.7	0.99302
20241.2	0.98963	20238.7	0.9804	20238.7	1.02255	20241.6	0.9978	20241	0.99302
20241.6	0.9895	20239.1	0.97943	20239.1	1.02363	20242	0.99768	20241.4	0.99302
20242	0.98978	20239.5	0.97954	20239.5	1.02493	20242.4	0.99764	20241.8	0.99302
20242.4	0.9894	20239.9	0.97977	20239.9	1.02563	20242.8	0.99769	20242.2	0.99302
20242.8	0.98922	20240.3	0.97946	20240.3	1.02639	20243.3	0.99761	20242.7	0.99302
20243.3	0.98918	20240.8	0.97915	20240.8	1.02745	20243.7	0.99776	20243.1	0.99302
20243.7	0.98969	20241.2	0.97917	20241.2	1.02823	20244.1	0.99799	20243.5	0.99302
20244.1	0.98995	20241.6	0.97928	20241.6	1.02839	20244.5	0.99768	20243.9	0.99306
20244.5	0.99008	20242	0.97908	20242	1.02886	20244.9	0.99785	20244.4	0.99311
20244.9	0.98998	20242.4	0.97884	20242.4	1.02958	20245.4	0.99795	20244.8	0.99315
20245.3	0.99053	20242.8	0.97871	20242.8	1.02949	20245.8	0.99793	20245.2	0.99319
20245.8	0.98997	20243.3	0.97868	20243.3	1.02977	20246.2	0.99808	20245.6	0.99323
20246.2	0.9903	20243.7	0.97876	20243.7	1.02999	20246.6	0.99814	20246	0.99328
20246.6	0.99073	20244.1	0.97883	20244.1	1.03033	20247	0.99807	20246.4	0.99332
20247	0.99078	20244.5	0.97871	20244.5	1.03039	20247.4	0.99817	20246.8	0.99337
20247.4	0.9912	20244.9	0.97861	20244.9	1.03053	20247.8	0.9983	20247.2	0.99349
20247.9	0.991	20245.4	0.97844	20245.4	1.03091	20248.2	0.99832	20247.7	0.99363
20248.3	0.99158	20245.8	0.97847	20245.8	1.03086	20248.5	0.99834	20248.1	0.99376
20248.7	0.99154	20246.2	0.97872	20246.2	1.03086	20248.9	0.99849	20248.5	0.99389
20249.1	0.99177	20246.6	0.97873	20246.6	1.03081	20249.3	0.99867	20248.9	0.99402
20249.5	0.99187	20247	0.97885	20247	1.03107	20249.7	0.99868	20249.3	0.99414
20249.9	0.99252	20247.4	0.97895	20247.4	1.03121	20250	0.99885	20249.7	0.99426
20250.3	0.9922	20247.8	0.97885	20247.8	1.0309	20250.4	0.99882	20250.1	0.99438
20250.7	0.99317	20248.2	0.97895	20248.2	1.03088	20250.8	0.99888	20250.5	0.99448
20251	0.99357	20248.5	0.97903	20248.5	1.03111	20251.1	0.99904	20250.9	0.99459
20251.4	0.99353	20248.9	0.97893	20248.9	1.03124	20251.4	0.9991	20251.2	0.99469
20251.8	0.99328	20249.3	0.97903	20249.3	1.03121	20251.8	0.99908	20251.6	0.99479
20252.2	0.99419	20249.7	0.97892	20249.7	1.0311	20252.1	0.99912	20252	0.99489
20252.5	0.99419	20250	0.9797	20250	1.03128	20252.4	0.99958	20252.3	0.99499
20252.9	0.9943	20250.4	0.97949	20250.4	1.03114	20252.7	0.99955	20252.7	0.99509
20253.3	0.99475	20250.8	0.97953	20250.8	1.03129	20253	0.99945	20253.1	0.99519
20253.6	0.99471	20251.1	0.97975	20251.1	1.0316	20253.3	0.99959	20253.4	0.99528
20253.9	0.99546	20251.4	0.97992	20251.4	1.03172	20253.6	0.99977	20253.7	0.9954
20254.3	0.99508	20251.8	0.97944	20251.8	1.03181	20253.9	0.9997	20254.1	0.99559
20254.6	0.99546	20252.1	0.97968	20252.1	1.03207	20254.3	0.99991	20254.4	0.9958
20254.9	0.99604	20252.4	0.98013	20252.4	1.0322	20254.6	1.00011	20254.7	0.99598
20255.2	0.99604	20252.7	0.9807	20252.7	1.03251	20255	0.99989	20255	0.99616
20255.5	0.99585	20253	0.98046	20253	1.03232	20255.3	1.00022	20255.3	0.99635
20255.8	0.99648	20253.3	0.98065	20253.3	1.03234	20255.6	1.00012	20255.6	0.99654
20256.1	0.99686	20253.6	0.98068	20253.6	1.03261	20256	1.00051	20255.9	0.99674
20256.4	0.99735	20253.9	0.98084	20253.9	1.03281	20256.3	1.00055	20256.3	0.99693
20256.8	0.99756	20254.3	0.98129	20254.3	1.03279	20256.6	1.00048	20256.6	0.99714
20257.1	0.99748	20254.6	0.98166	20254.6	1.03296	20257	1.00069	20256.9	0.99734
20257.5	0.99704	20255	0.98224	20255	1.03311	20257.3	1.00083	20257.3	0.99755
20257.8	0.99761	20255.3	0.98245	20255.3	1.03304	20257.7	1.00089	20257.6	0.99777
20258.1	0.99772	20255.6	0.98259	20255.6	1.03301	20258.1	1.00095	20257.9	0.99798
20258.5	0.99821	20256	0.9832	20256	1.03279	20258.5	1.00114	20258.3	0.99819
20258.8	0.99854	20256.3	0.98382	20256.3	1.03272	20259	1.00149	20258.6	0.99841
20259.1	0.99841	20256.6	0.98393	20256.6	1.0325	20259.4	1.0016	20258.9	0.99862
20259.5	0.99861	20257	0.98455	20257	1.03215	20259.8	1.00154	20259.3	0.99884
20259.8	0.99829	20257.3	0.98523	20257.3	1.03211	20260.2	1.00183	20259.7	0.99908
20260.2	0.99918	20257.7	0.98535	20257.7	1.03181	20260.6	1.00201	20260	0.99933
20260.6	0.99873	20258.1	0.98602	20258.1	1.03108	20261.1	1.00211	20260.4	0.99958
20261	0.99864	20258.5	0.98633	20258.5	1.03082	20261.5	1.00232	20260.8	0.99988
20261.5	0.99937	20259	0.98685	20259	1.02987	20261.9	1.00254	20261.3	1.00021
20261.9	0.99895	20259.4	0.98758	20259.4	1.02943	20262.3	1.00262	20261.7	1.00053
20262.3	0.9989	20259.8	0.98836	20259.8	1.02859	20262.7	1.00291	20262.1	1.00085
20262.7	0.99916	20260.2	0.98876	20260.2	1.02805	20263.1	1.00288	20262.6	1.00117
20263.1	1.00019	20260.6	0.9893	20260.6	1.02713	20263.5	1.0032	20263	1.00148
20263.6	0.99962	20261.1	0.9902	20261.1	1.02652	20264	1.00361	20263.4	1.00179
20264	1.00025	20261.5	0.99103	20261.5	1.02561	20264.4	1.00341	20263.8	1.00208
20264.4	1.00071	20261.9	0.99157	20261.9	1.02449	20264.8	1.00386	20264.2	1.0024
20264.8	1.00022	20262.3	0.99197	20262.3	1.02412	20265.2	1.00395	20264.6	1.00272
20265.2	1.00069	20262.7	0.99242	20262.7	1.02332	20265.6	1.00414	20265	1.00303
20265.6	1.00044	20263.1	0.99309	20263.1	1.02247	20266	1.00416	20265.4	1.00337
20266	1.00068	20263.5	0.99413	20263.5	1.0219	20266.4	1.00445	20265.8	1.00369
20266.5	1.00078	20264	0.99479	20264	1.02121	20266.8	1.00451	20266.3	1.00402
20266.9	1.00051	20264.4	0.99528	20264.4	1.02053	20267.1	1.00477	20266.7	1.00436
20267.3	1.00117	20264.8	0.99606	20264.8	1.01972	20267.5	1.00488	20267.1	1.00468
20267.7	1.00164	20265.2	0.99679	20265.2	1.01881	20267.9	1.00486	20267.5	1.00497
20268.1	1.00164	20265.6	0.99734	20265.6	1.01804	20268.3	1.00522	20267.9	1.00522
20268.5	1.00203	20266	0.99792	20266	1.0169	20268.6	1.00527	20268.3	1.00547
20268.9	1.00242	20266.4	0.99879	20266.4	1.01596	20269	1.00538	20268.7	1.00572
20269.3	1.0027	20266.8	0.99946	20266.8	1.01519	20269.3	1.00542	20269.1	1.00598
20269.6	1.00289	20267.1	0.99974	20267.1	1.01444	20269.7	1.00558	20269.4	1.00622
20270	1.00286	20267.5	1.00022	20267.5	1.01343	20270	1.00547	20269.8	1.00647
20270.4	1.00312	20267.9	1.00075	20267.9	1.01244	20270.4	1.0056	20270.2	1.00671
20270.8	1.00367	20268.3	1.00168	20268.3	1.01146	20270.7	1.00578	20270.6	1.00696
20271.1	1.00342	20268.6	1.00259	20268.6	1.01072	20271	1.00568	20270.9	1.00715
20271.5	1.00393	20269	1.00345	20269	1.00974	20271.3	1.00573	20271.3	1.00727
20271.8	1.00423	20269.3	1.0038	20269.3	1.00883	20271.6	1.00579	20271.6	1.0074
20272.2	1.00432	20269.7	1.00433	20269.7	1.00787	20271.9	1.00564	20272	1.00752
20272.5	1.00465	20270	1.00532	20270	1.00664	20272.2	1.00575	20272.3	1.00765
20272.9	1.00451	20270.4	1.00592	20270.4	1.00531	20272.6	1.00606	20272.6	1.00775
20273.2	1.00445	20270.7	1.00642	20270.7	1.00439	20272.9	1.0059	20273	1.00787
20273.5	1.00474	20271	1.00723	20271	1.00347	20273.2	1.0058	20273.3	1.00798
20273.8	1.00498	20271.3	1.00743	20271.3	1.00213	20273.5	1.00585	20273.6	1.00809
20274.1	1.00512	20271.6	1.00811	20271.6	1.00099	20273.9	1.00593	20273.9	1.0082
20274.4	1.00542	20271.9	1.00818	20271.9	0.99984	20274.2	1.00599	20274.2	1.00825
20274.7	1.00547	20272.2	1.00852	20272.2	0.99849	20274.5	1.00594	20274.5	1.00828
20275.1	1.00514	20272.6	1.00925	20272.6	0.99757	20274.9	1.00573	20274.9	1.00831
20275.4	1.00591	20272.9	1.00984	20272.9	0.99586	20275.2	1.00601	20275.2	1.00834
20275.7	1.00558	20273.2	1.01043	20273.2	0.99463	20275.6	1.00604	20275.5	1.00837
20276	1.00574	20273.5	1.01051	20273.5	0.99345	20276	1.006	20275.8	1.00839
20276.4	1.00517	20273.9	1.01055	20273.9	0.99215	20276.3	1.00597	20276.2	1.00842
20276.7	1.0062	20274.2	1.01109	20274.2	0.99075	20276.7	1.00606	20276.5	1.00845
20277	1.0056	20274.5	1.01149	20274.5	0.98948	20277.1	1.00609	20276.9	1.00848
20277.4	1.00611	20274.9	1.01191	20274.9	0.98806	20277.6	1.00588	20277.2	1.00851
20277.7	1.00593	20275.2	1.0117	20275.2	0.98694	20278	1.00589	20277.5	1.00848
20278.1	1.00579	20275.6	1.01253	20275.6	0.9853	20278.4	1.00593	20277.9	1.00844
20278.5	1.00594	20276	1.01229	20276	0.98414	20278.9	1.00579	20278.3	1.0084
20278.8	1.00577	20276.3	1.01271	20276.3	0.98234	20279.3	1.00579	20278.6	1.00836
20279.2	1.00601	20276.7	1.01263	20276.7	0.98109	20279.7	1.0061	20279.1	1.00832
20279.6	1.00608	20277.1	1.0127	20277.1	0.97942	20280.1	1.00587	20279.5	1.00827
20280.1	1.00582	20277.6	1.01294	20277.6	0.97832	20280.5	1.00574	20279.9	1.00823
20280.5	1.00605	20278	1.01302	20278	0.97724	20280.9	1.00602	20280.3	1.00818
20280.9	1.00574	20278.4	1.0133	20278.4	0.97589	20281.3	1.00564	20280.8	1.00813
20281.4	1.00596	20278.9	1.01311	20278.9	0.97515	20281.7	1.00586	20281.2	1.00808
20281.8	1.0057	20279.3	1.01282	20279.3	0.97405	20282.2	1.00578	20281.6	1.00802
20282.2	1.00596	20279.7	1.01256	20279.7	0.97328	20282.6	1.0058	20282	1.00796
20282.6	1.00596	20280.1	1.01237	20280.1	0.97246	20283	1.00575	20282.4	1.00791
20283	1.00585	20280.5	1.012	20280.5	0.97146	20283.4	1.00571	20282.8	1.00785
20283.4	1.00541	20280.9	1.01175	20280.9	0.97093	20283.9	1.00556	20283.2	1.00779
20283.8	1.00565	20281.3	1.01157	20281.3	0.97002	20284.3	1.00571	20283.6	1.00773
20284.2	1.00568	20281.7	1.01136	20281.7	0.96906	20284.6	1.00554	20284	1.00767
20284.7	1.00512	20282.2	1.01133	20282.2	0.96875	20285	1.00546	20284.5	1.00761
20285.1	1.00515	20282.6	1.01104	20282.6	0.96801	20285.4	1.00556	20284.9	1.00752
20285.5	1.00495	20283	1.01085	20283	0.96707	20285.8	1.00515	20285.3	1.00743
20285.9	1.0051	20283.4	1.0103	20283.4	0.96667	20286.2	1.00527	20285.7	1.00735
20286.4	1.00504	20283.9	1.0097	20283.9	0.96608	20286.5	1.00542	20286.2	1.00726
20286.8	1.00496	20284.3	1.00944	20284.3	0.96541	20286.9	1.00541	20286.6	1.00718
20287.1	1.00505	20284.6	1.00906	20284.6	0.96483	20287.3	1.00522	20286.9	1.0071
20287.5	1.00495	20285	1.00867	20285	0.9641	20287.7	1.00523	20287.3	1.00702
20287.9	1.00467	20285.4	1.00857	20285.4	0.96327	20288	1.00525	20287.7	1.00694
20288.3	1.00462	20285.8	1.00821	20285.8	0.96276	20288.3	1.00507	20288.1	1.0068
20288.7	1.00417	20286.2	1.00767	20286.2	0.96238	20288.7	1.00499	20288.5	1.00666
20289	1.00417	20286.5	1.00728	20286.5	0.9617	20289	1.00502	20288.8	1.00652
20289.4	1.00453	20286.9	1.00687	20286.9	0.9612	20289.3	1.00477	20289.2	1.00637
20289.8	1.00434	20287.3	1.0062	20287.3	0.9608	20289.7	1.00487	20289.6	1.00623
20290.2	1.00464	20287.7	1.00587	20287.7	0.96039	20290	1.00476	20289.9	1.0061
20290.5	1.00389	20288	1.00559	20288	0.95978	20290.3	1.00466	20290.3	1.00595
20290.8	1.00377	20288.3	1.00515	20288.3	0.9593	20290.6	1.00472	20290.7	1.00583
20291.2	1.00357	20288.7	1.005	20288.7	0.95898	20290.9	1.00476	20291	1.00569
20291.5	1.00321	20289	1.00466	20289	0.95851	20291.2	1.00462	20291.3	1.00555
20291.8	1.00342	20289.3	1.00435	20289.3	0.9581	20291.6	1.00432	20291.6	1.00541
20292.2	1.0039	20289.7	1.00363	20289.7	0.95774	20291.9	1.00447	20292	1.00527
20292.5	1.00331	20290	1.00311	20290	0.95761	20292.2	1.0044	20292.3	1.00514
20292.8	1.00304	20290.3	1.0032	20290.3	0.95739	20292.6	1.00419	20292.6	1.005
20293.1	1.00311	20290.6	1.00295	20290.6	0.95709	20292.9	1.00394	20292.9	1.00485
20293.4	1.0034	20290.9	1.00247	20290.9	0.95706	20293.3	1.00402	20293.2	1.00471
20293.7	1.00229	20291.2	1.00228	20291.2	0.95649	20293.6	1.00405	20293.5	1.00456
20294.1	1.00262	20291.6	1.00158	20291.6	0.95632	20293.9	1.00389	20293.9	1.00441
20294.4	1.00263	20291.9	1.00139	20291.9	0.95646	20294.3	1.0038	20294.2	1.00426
20294.7	1.00263	20292.2	1.00152	20292.2	0.95638	20294.7	1.00367	20294.6	1.0041
20295.1	1.00214	20292.6	1.00096	20292.6	0.95674	20295	1.00345	20294.9	1.00393
20295.4	1.00225	20292.9	1.00051	20292.9	0.95687	20295.4	1.00347	20295.2	1.00376
20295.8	1.00185	20293.3	1.00035	20293.3	0.95688	20295.9	1.00331	20295.6	1.00359
20296.1	1.00145	20293.6	1.00014	20293.6	0.95697	20296.3	1.00323	20295.9	1.00343
20296.4	1.00089	20293.9	0.99969	20293.9	0.95731	20296.7	1.003	20296.3	1.00325
20296.8	1.00132	20294.3	0.99962	20294.3	0.95786	20297.2	1.00291	20296.6	1.00307
20297.2	1.00122	20294.7	0.9997	20294.7	0.95837	20297.6	1.00279	20297	1.00289
20297.5	1.00071	20295	0.99946	20295	0.95922	20298	1.00257	20297.4	1.0027
20297.9	1.00022	20295.4	0.99951	20295.4	0.95967	20298.4	1.00229	20297.8	1.0025
20298.4	1.00027	20295.9	0.99911	20295.9	0.96074	20298.8	1.00213	20298.2	1.00232
20298.8	1.00032	20296.3	0.99919	20296.3	0.96212	20299.2	1.00201	20298.6	1.00215
20299.2	1.00035	20296.7	0.9991	20296.7	0.96349	20299.6	1.00178	20299.1	1.00197
20299.7	0.99991	20297.2	0.99904	20297.2	0.9643	20300	1.00174	20299.5	1.0018
20300.1	0.99957	20297.6	0.99915	20297.6	0.96587	20300.5	1.00156	20299.9	1.00163
20300.5	0.9992	20298	0.99906	20298	0.96689	20300.9	1.00127	20300.3	1.00147
20300.9	0.99897	20298.4	0.99886	20298.4	0.96834	20301.3	1.00113	20300.7	1.00131
20301.3	0.9985	20298.8	0.9987	20298.8	0.96924	20301.7	1.00104	20301.1	1.00115
20301.7	0.99864	20299.2	0.99886	20299.2	0.97022	20302.2	1.00069	20301.6	1.00098
20302.1	0.99802	20299.6	0.99884	20299.6	0.97167	20302.6	1.00081	20302	1.0008
20302.5	0.99846	20300	0.99866	20300	0.97278	20303	1.00056	20302.4	1.0006
20303	0.99743	20300.5	0.9985	20300.5	0.97387	20303.4	1.00024	20302.8	1.00041
20303.4	0.99722	20300.9	0.99847	20300.9	0.97518	20303.7	1.00029	20303.3	1.00022
20303.8	0.99759	20301.3	0.9987	20301.3	0.97607	20304.1	1.00013	20303.7	1.00002
20304.2	0.99746	20301.7	0.99841	20301.7	0.97718	20304.5	1.00006	20304.1	0.99984
20304.7	0.9963	20302.2	0.99849	20302.2	0.97794	20304.9	0.99986	20304.5	0.99964
20305.1	0.99663	20302.6	0.99875	20302.6	0.97881	20305.3	1.00001	20304.9	0.99948
20305.5	0.99671	20303	0.99852	20303	0.97971	20305.6	0.99962	20305.3	0.99936
20305.9	0.99606	20303.4	0.99853	20303.4	0.98061	20306	0.99948	20305.7	0.99924
20306.2	0.99634	20303.7	0.99849	20303.7	0.9817	20306.3	0.99944	20306.1	0.99913
20306.6	0.99542	20304.1	0.99817	20304.1	0.98258	20306.7	0.99943	20306.5	0.99901
20307	0.99569	20304.5	0.99813	20304.5	0.98339	20307.1	0.99926	20306.9	0.9989
20307.4	0.99561	20304.9	0.99875	20304.9	0.9844	20307.4	0.99927	20307.2	0.99878
20307.8	0.99498	20305.3	0.99912	20305.3	0.98532	20307.7	0.99922	20307.6	0.99867
20308.1	0.99516	20305.6	0.99911	20305.6	0.98618	20308	0.99915	20308	0.99856
20308.5	0.99517	20306	0.99893	20306	0.98688	20308.3	0.999	20308.3	0.99846
20308.8	0.99427	20306.3	0.99925	20306.3	0.98757	20308.7	0.99887	20308.7	0.99838
20309.2	0.99437	20306.7	0.9991	20306.7	0.98845	20309	0.99895	20309.1	0.9983
20309.6	0.99454	20307.1	0.99924	20307.1	0.98928	20309.3	0.9989	20309.4	0.99822
20309.9	0.99435	20307.4	0.99957	20307.4	0.98995	20309.6	0.99887	20309.7	0.99815
20310.2	0.9944	20307.7	1.00025	20307.7	0.99071	20309.9	0.99882	20310.1	0.99807
20310.5	0.99428	20308	0.99961	20308	0.99181	20310.3	0.99876	20310.4	0.998
20310.8	0.99402	20308.3	0.99969	20308.3	0.99243	20310.6	0.99875	20310.7	0.99793
20311.2	0.99401	20308.7	0.99974	20308.7	0.99304	20310.9	0.99878	20311	0.99786
20311.5	0.99366	20309	0.99988	20309	0.99406	20311.3	0.99856	20311.3	0.99779
20311.8	0.99393	20309.3	1	20309.3	0.99481	20311.6	0.99878	20311.6	0.99773
20312.1	0.99428	20309.6	1.00026	20309.6	0.99567	20311.9	0.99877	20311.9	0.9977
20312.4	0.99404	20309.9	1.00023	20309.9	0.99621	20312.3	0.99868	20312.3	0.99767
20312.8	0.99398	20310.3	1.0004	20310.3	0.99701	20312.6	0.99864	20312.6	0.99763
20313.1	0.99378	20310.6	1.00037	20310.6	0.99783	20313	0.99881	20312.9	0.9976
20313.4	0.99379	20310.9	1.00007	20310.9	0.99868	20313.3	0.99877	20313.3	0.99757
20313.8	0.99392	20311.3	1.00057	20311.3	0.99965	20313.7	0.99863	20313.6	0.99753
20314.1	0.99429	20311.6	1.00075	20311.6	1.00045	20314.1	0.99856	20313.9	0.9975
20314.4	0.99377	20311.9	1.00096	20311.9	1.00138	20314.5	0.99883	20314.3	0.99746
20314.8	0.99479	20312.3	1.00063	20312.3	1.00211	20315	0.99869	20314.6	0.99743
20315.1	0.99436	20312.6	1.0011	20312.6	1.00307	20315.4	0.99852	20315	0.99739
20315.5	0.9945	20313	1.00133	20313	1.00401	20315.8	0.99877	20315.3	0.99742
20315.8	0.99447	20313.3	1.00089	20313.3	1.00493	20316.3	0.99861	20315.7	0.99746
20316.2	0.99506	20313.7	1.00169	20313.7	1.00583	20316.7	0.99866	20316.1	0.9975
20316.6	0.99515	20314.1	1.00154	20314.1	1.00655	20317.1	0.99867	20316.5	0.99753
20317	0.99509	20314.5	1.00173	20314.5	1.00788	20317.5	0.99869	20316.9	0.99758
20317.5	0.99595	20315	1.0016	20315	1.0086	20317.9	0.99884	20317.3	0.99762
20317.9	0.99613	20315.4	1.00163	20315.4	1.00922	20318.3	0.99878	20317.8	0.99766
20318.3	0.99617	20315.8	1.00161	20315.8	1.01007	20318.7	0.99866	20318.2	0.9977
20318.8	0.9967	20316.3	1.00169	20316.3	1.01137	20319.1	0.99866	20318.6	0.99776
20319.2	0.99705	20316.7	1.00184	20316.7	1.01193	20319.6	0.99876	20319	0.99784
20319.6	0.99701	20317.1	1.00195	20317.1	1.01233	20320	0.99878	20319.4	0.99792
20320	0.99769	20317.5	1.00215	20317.5	1.01308	20320.4	0.99876	20319.8	0.998
20320.4	0.9973	20317.9	1.00204	20317.9	1.01374	20320.8	0.9988	20320.3	0.99808
20320.8	0.99814	20318.3	1.00217	20318.3	1.01405	20321.3	0.99888	20320.7	0.99816
20321.2	0.9983	20318.7	1.00221	20318.7	1.01436	20321.6	0.99895	20321.1	0.99825
20321.6	0.99824	20319.1	1.00241	20319.1	1.0151	20322	0.99891	20321.5	0.99833
20322.1	0.99925	20319.6	1.00231	20319.6	1.01549	20322.4	0.99889	20321.9	0.99842
20322.5	0.99915	20320	1.00224	20320	1.01618	20322.8	0.99898	20322.4	0.99849
20322.9	0.99934	20320.4	1.00224	20320.4	1.01681	20323.2	0.99897	20322.8	0.99857
20323.3	1.00009	20320.8	1.00199	20320.8	1.01728	20323.6	0.99887	20323.2	0.99864
20323.8	1.00027	20321.3	1.00193	20321.3	1.01748	20323.9	0.99919	20323.6	0.99871
20324.1	1.00049	20321.6	1.002	20321.6	1.01778	20324.3	0.99895	20324	0.99878
20324.5	1.00116	20322	1.00199	20322	1.01833	20324.7	0.99887	20324.4	0.99885
20324.9	1.00096	20322.4	1.00204	20322.4	1.01825	20325.1	0.99905	20324.8	0.99892
20325.3	1.00185	20322.8	1.00165	20322.8	1.01879	20325.4	0.99909	20325.2	0.99899
20325.7	1.00201	20323.2	1.00202	20323.2	1.01894	20325.8	0.99913	20325.6	0.99904
20326.1	1.00244	20323.6	1.00205	20323.6	1.01938	20326.1	0.99921	20325.9	0.9991
20326.4	1.0031	20323.9	1.00189	20323.9	1.01952	20326.4	0.99927	20326.3	0.99915
20326.8	1.00248	20324.3	1.00157	20324.3	1.01978	20326.8	0.99916	20326.7	0.9992
20327.2	1.00365	20324.7	1.00154	20324.7	1.01994	20327.1	0.99905	20327	0.99926
20327.6	1.00331	20325.1	1.00178	20325.1	1.02012	20327.4	0.99916	20327.4	0.99931
20327.9	1.00384	20325.4	1.00189	20325.4	1.02073	20327.7	0.99913	20327.8	0.99936
20328.3	1.00359	20325.8	1.00176	20325.8	1.02079	20328	0.99912	20328.1	0.99941
20328.6	1.00427	20326.1	1.00118	20326.1	1.02104	20328.3	0.99919	20328.4	0.99946
20328.9	1.00411	20326.4	1.00171	20326.4	1.02095	20328.6	0.99905	20328.8	0.99951
20329.3	1.00449	20326.8	1.00155	20326.8	1.02097	20329	0.9991	20329.1	0.99954
20329.6	1.00481	20327.1	1.00103	20327.1	1.02118	20329.3	0.99919	20329.4	0.99958
20329.9	1.00521	20327.4	1.00131	20327.4	1.0215	20329.6	0.99914	20329.7	0.99962
20330.2	1.00465	20327.7	1.00116	20327.7	1.02152	20330	0.99905	20330	0.99965
20330.5	1.00526	20328	1.00076	20328	1.02139	20330.3	0.99906	20330.3	0.99969
20330.8	1.00573	20328.3	1.00054	20328.3	1.02153	20330.7	0.99924	20330.7	0.99973
20331.1	1.0059	20328.6	1.00075	20328.6	1.02161	20331	0.99928	20331	0.99976
20331.5	1.00584	20329	1.0007	20329	1.02182	20331.3	0.99918	20331.3	0.9998
20331.8	1.00599	20329.3	1.00002	20329.3	1.02189	20331.7	0.99909	20331.7	0.99984
20332.1	1.00594	20329.6	0.99998	20329.6	1.02172	20332.1	0.99905	20332	0.99988
20332.5	1.00597	20330	1.00016	20330	1.02179	20332.5	0.99933	20332.3	0.99989
20332.8	1.00608	20330.3	1.00018	20330.3	1.02186	20332.9	0.99927	20332.7	0.99989
20333.2	1.00616	20330.7	1.00017	20330.7	1.02197	20333.3	0.99905	20333	0.99989
20333.5	1.0067	20331	1	20331	1.0217	20333.7	0.99911	20333.4	0.9999
20333.8	1.00624	20331.3	0.99969	20331.3	1.02146	20334.1	0.99921	20333.7	0.9999
20334.2	1.00637	20331.7	0.99937	20331.7	1.02131	20334.6	0.99921	20334.1	0.9999
20334.6	1.00606	20332.1	0.99971	20332.1	1.02127	20335	0.99901	20334.4	0.9999
20335	1.00645	20332.5	0.99947	20332.5	1.0212	20335.4	0.99906	20334.8	0.9999
20335.4	1.00658	20332.9	0.9993	20332.9	1.02079	20335.8	0.99888	20335.2	0.9999
20335.8	1.00681	20333.3	0.99897	20333.3	1.02054	20336.2	0.99898	20335.6	0.9999
20336.2	1.00661	20333.7	0.99929	20333.7	1.02045	20336.6	0.99898	20336.1	0.9999
20336.6	1.00622	20334.1	0.99896	20334.1	1.01975	20337	0.99869	20336.5	0.9999
20337.1	1.00666	20334.6	0.99847	20334.6	1.01941	20337.5	0.9989	20337	0.99991
20337.5	1.00613	20335	0.99866	20335	1.019	20337.9	0.9987	20337.4	0.99991
20337.9	1.00624	20335.4	0.99862	20335.4	1.01836	20338.3	0.99878	20337.8	0.99991
20338.3	1.00658	20335.8	0.99843	20335.8	1.01781	20338.8	0.99874	20338.2	0.99991
20338.7	1.00645	20336.2	0.99868	20336.2	1.01717	20339.2	0.99851	20338.6	0.99992
20339.1	1.0063	20336.6	0.99878	20336.6	1.01675	20339.6	0.99863	20339	0.99991
20339.5	1.00652	20337	0.99879	20337	1.0165	20340	0.99848	20339.4	0.99987
20340	1.0063	20337.5	0.99857	20337.5	1.01602	20340.4	0.99849	20339.8	0.99983
20340.4	1.00591	20337.9	0.99863	20337.9	1.01533	20340.8	0.99832	20340.3	0.99979
20340.8	1.00599	20338.3	0.99845	20338.3	1.01517	20341.2	0.99828	20340.7	0.99976
20341.2	1.00555	20338.8	0.99837	20338.8	1.01478	20341.6	0.99835	20341.1	0.99972
20341.7	1.00585	20339.2	0.9986	20339.2	1.01424	20342	0.99827	20341.6	0.99968
20342.1	1.00534	20339.6	0.99888	20339.6	1.01398	20342.3	0.99813	20342	0.99964
20342.5	1.00547	20340	0.99894	20340	1.01361	20342.7	0.99807	20342.4	0.9996
20342.9	1.00475	20340.4	0.99892	20340.4	1.01307	20343.1	0.99814	20342.8	0.99954
20343.3	1.00506	20340.8	0.99902	20340.8	1.01252	20343.5	0.99814	20343.2	0.99947
20343.7	1.00462	20341.2	0.99913	20341.2	1.01232	20343.8	0.9979	20343.6	0.9994
20344.1	1.00449	20341.6	0.99924	20341.6	1.01182	20344.2	0.99792	20343.9	0.99933
20344.5	1.00408	20342	0.99945	20342	1.01164	20344.5	0.9978	20344.3	0.99926
20344.8	1.00424	20342.3	0.9992	20342.3	1.0115	20344.9	0.99777	20344.7	0.99919
20345.2	1.00342	20342.7	0.99923	20342.7	1.01149	20345.2	0.99784	20345.1	0.99912
20345.6	1.00403	20343.1	0.99951	20343.1	1.01086	20345.5	0.99763	20345.5	0.99906
20346	1.00323	20343.5	0.99977	20343.5	1.0103	20345.9	0.99757	20345.8	0.99899
20346.3	1.00329	20343.8	0.99961	20343.8	1.01032	20346.2	0.99747	20346.2	0.99892
20346.7	1.00283	20344.2	0.99939	20344.2	1.00985	20346.5	0.99754	20346.6	0.99884
20347	1.00197	20344.5	0.99962	20344.5	1.00982	20346.8	0.99764	20346.9	0.99876
20347.4	1.00162	20344.9	0.99953	20344.9	1.00995	20347.1	0.99749	20347.2	0.99868
20347.7	1.00149	20345.2	0.99939	20345.2	1.00957	20347.5	0.99769	20347.6	0.99861
20348	1.00146	20345.5	0.99964	20345.5	1.00926	20347.8	0.99753	20347.9	0.99854
20348.4	1.00118	20345.9	0.99974	20345.9	1.00918	20348.1	0.99743	20348.2	0.99847
20348.7	1.00089	20346.2	0.9997	20346.2	1.00921	20348.5	0.99752	20348.5	0.99841
20349	1.00033	20346.5	0.99961	20346.5	1.00889	20348.8	0.99763	20348.8	0.99833
20349.3	1.00053	20346.8	0.99963	20346.8	1.00868	20349.1	0.99731	20349.1	0.99826
20349.6	1.00032	20347.1	0.99997	20347.1	1.00889	20349.5	0.99728	20349.5	0.9982
20350	0.9995	20347.5	0.99966	20347.5	1.00877	20349.8	0.99735	20349.8	0.99815
20350.3	0.99911	20347.8	0.99935	20347.8	1.00861	20350.2	0.99735	20350.1	0.99809
20350.6	0.99907	20348.1	0.99958	20348.1	1.00858	20350.5	0.99725	20350.5	0.99803
20351	0.99853	20348.5	0.99941	20348.5	1.00855	20350.9	0.99733	20350.8	0.99797
20351.3	0.99829	20348.8	0.99933	20348.8	1.00835	20351.3	0.99729	20351.1	0.99791
20351.6	0.99772	20349.1	0.99946	20349.1	1.00843	20351.7	0.99721	20351.5	0.99785
20352	0.99747	20349.5	0.99964	20349.5	1.00863	20352.1	0.99736	20351.8	0.99779
20352.3	0.9974	20349.8	0.99892	20349.8	1.00838	20352.5	0.99707	20352.2	0.99773
20352.7	0.99712	20350.2	0.99891	20350.2	1.00847	20353	0.9971	20352.5	0.99767
20353	0.99676	20350.5	0.99911	20350.5	1.00829	20353.4	0.99721	20352.9	0.99762
20353.4	0.9966	20350.9	0.9987	20350.9	1.00804	20353.8	0.9972	20353.3	0.99756
20353.8	0.99626	20351.3	0.99838	20351.3	1.00808	20354.2	0.99717	20353.6	0.99751
20354.2	0.99631	20351.7	0.99849	20351.7	1.00759	20354.7	0.99722	20354.1	0.99745
20354.6	0.99563	20352.1	0.99819	20352.1	1.00739	20355.1	0.99705	20354.5	0.9974
20355	0.99574	20352.5	0.99788	20352.5	1.00724	20355.5	0.99705	20354.9	0.99734
20355.5	0.99549	20353	0.99772	20353	1.00712	20355.9	0.99699	20355.4	0.99728
20355.9	0.99529	20353.4	0.99752	20353.4	1.0064	20356.3	0.99689	20355.8	0.99722
20356.3	0.99535	20353.8	0.99735	20353.8	1.0061	20356.7	0.99694	20356.2	0.99717
20356.7	0.99497	20354.2	0.99728	20354.2	1.00587	20357.2	0.99699	20356.6	0.99714
20357.2	0.99456	20354.7	0.99742	20354.7	1.00539	20357.6	0.99705	20357	0.99711
20357.6	0.99487	20355.1	0.99717	20355.1	1.00466	20358	0.99698	20357.5	0.99709
20358	0.99426	20355.5	0.99687	20355.5	1.00397	20358.5	0.99712	20357.9	0.99706
20358.4	0.99406	20355.9	0.99664	20355.9	1.00356	20358.9	0.99705	20358.3	0.99703
20358.8	0.99428	20356.3	0.99642	20356.3	1.00313	20359.3	0.997	20358.7	0.997
20359.2	0.9939	20356.7	0.99613	20356.7	1.00243	20359.7	0.99701	20359.1	0.99697
20359.7	0.99348	20357.2	0.99632	20357.2	1.00163	20360.1	0.99703	20359.6	0.99694
20360.1	0.99333	20357.6	0.9959	20357.6	1.00131	20360.4	0.99696	20360	0.99691
20360.5	0.99352	20358	0.99505	20358	1.00064	20360.8	0.99692	20360.4	0.99688
20361	0.99314	20358.5	0.9951	20358.5	0.99988	20361.2	0.99701	20360.8	0.99684
20361.4	0.99297	20358.9	0.99489	20358.9	0.99918	20361.6	0.997	20361.3	0.99681
20361.8	0.993	20359.3	0.99441	20359.3	0.99848	20362	0.99692	20361.6	0.99678
20362.2	0.99294	20359.7	0.99451	20359.7	0.99768	20362.3	0.99696	20362	0.99675
20362.6	0.99302	20360.1	0.99447	20360.1	0.99715	20362.7	0.99695	20362.4	0.99672
20362.9	0.99228	20360.4	0.99379	20360.4	0.99644	20363	0.99693	20362.8	0.99669
20363.3	0.99241	20360.8	0.99331	20360.8	0.99551	20363.4	0.99693	20363.2	0.99666
20363.7	0.99232	20361.2	0.99265	20361.2	0.99477	20363.7	0.99689	20363.6	0.99663
20364.1	0.99217	20361.6	0.99295	20361.6	0.99434	20364.1	0.99717	20363.9	0.99661
20364.5	0.99192	20362	0.99248	20362	0.99386	20364.4	0.99691	20364.3	0.99658
20364.8	0.99198	20362.3	0.99242	20362.3	0.99287	20364.7	0.99693	20364.7	0.99655
20365.2	0.99177	20362.7	0.99185	20362.7	0.99232	20365	0.99701	20365	0.99653
20365.5	0.99151	20363	0.99152	20363	0.99161	20365.3	0.99701	20365.4	0.9965
20365.9	0.99163	20363.4	0.99124	20363.4	0.99088	20365.6	0.99693	20365.7	0.99648
20366.2	0.99177	20363.7	0.99141	20363.7	0.9905	20365.9	0.9969	20366.1	0.99645
20366.6	0.99128	20364.1	0.99108	20364.1	0.98984	20366.3	0.99701	20366.4	0.99643
20366.9	0.99136	20364.4	0.99054	20364.4	0.98913	20366.6	0.99709	20366.7	0.9964
20367.2	0.99144	20364.7	0.99044	20364.7	0.98865	20367	0.99714	20367	0.99637
20367.5	0.99129	20365	0.99005	20365	0.98821	20367.3	0.99692	20367.3	0.99634
20367.8	0.99119	20365.3	0.98922	20365.3	0.98796	20367.6	0.99707	20367.6	0.99631
20368.1	0.99082	20365.6	0.98899	20365.6	0.98755	20368	0.99698	20368	0.99628
20368.4	0.99087	20365.9	0.98918	20365.9	0.98709	20368.3	0.99695	20368.3	0.99625
20368.8	0.99136	20366.3	0.98873	20366.3	0.98679	20368.6	0.99706	20368.6	0.99622
20369.1	0.99134	20366.6	0.9882	20366.6	0.98653	20369	0.99704	20369	0.99618
20369.5	0.99111	20367	0.98796	20367	0.98611	20369.4	0.99708	20369.3	0.99615
20369.8	0.99116	20367.3	0.98794	20367.3	0.9855	20369.7	0.99704	20369.7	0.99612
20370.1	0.9908	20367.6	0.98728	20367.6	0.98555	20370.1	0.99702	20370	0.9961
20370.5	0.991	20368	0.987	20368	0.9853	20370.5	0.99698	20370.3	0.99609
20370.8	0.99116	20368.3	0.9867	20368.3	0.9852	20371	0.99724	20370.7	0.99609
20371.1	0.99159	20368.6	0.9866	20368.6	0.98485	20371.4	0.99703	20371	0.99608
20371.5	0.99117	20369	0.98584	20369	0.98469	20371.8	0.99714	20371.3	0.99607
20371.9	0.99142	20369.4	0.9857	20369.4	0.98474	20372.3	0.99707	20371.7	0.99606
20372.2	0.99089	20369.7	0.98585	20369.7	0.98476	20372.7	0.99695	20372.1	0.99605
20372.6	0.99159	20370.1	0.98542	20370.1	0.98461	20373.1	0.99698	20372.5	0.99604
20373	0.99153	20370.5	0.98518	20370.5	0.98492	20373.5	0.99678	20372.9	0.99603
20373.5	0.99098	20371	0.98488	20371	0.98463	20373.9	0.99707	20373.3	0.99602
20373.9	0.99178	20371.4	0.98437	20371.4	0.98485	20374.3	0.99713	20373.8	0.99601
20374.3	0.99197	20371.8	0.98389	20371.8	0.98517	20374.7	0.99701	20374.2	0.99599
20374.8	0.99134	20372.3	0.98386	20372.3	0.98511	20375.2	0.99713	20374.6	0.99598
20375.2	0.99202	20372.7	0.98392	20372.7	0.98546	20375.6	0.99689	20375.1	0.99596
20375.6	0.99206	20373.1	0.98361	20373.1	0.98565	20376	0.997	20375.5	0.99595
20376	0.99153	20373.5	0.98316	20373.5	0.98568	20376.5	0.99681	20375.9	0.99593
20376.4	0.99254	20373.9	0.98298	20373.9	0.98605	20376.9	0.99703	20376.3	0.99592
20376.8	0.99235	20374.3	0.98291	20374.3	0.98616	20377.3	0.99706	20376.7	0.9959
20377.2	0.99234	20374.7	0.98251	20374.7	0.98602	20377.7	0.997	20377.1	0.99588
20377.7	0.99206	20375.2	0.98256	20375.2	0.98617	20378.1	0.99701	20377.5	0.99586
20378.1	0.99241	20375.6	0.98275	20375.6	0.9864	20378.5	0.99707	20378	0.99582
20378.5	0.99302	20376	0.98253	20376	0.98637	20378.9	0.997	20378.4	0.99578
20379	0.99281	20376.5	0.98205	20376.5	0.9865	20379.3	0.99696	20378.8	0.99574
20379.4	0.99348	20376.9	0.98192	20376.9	0.98691	20379.7	0.9969	20379.2	0.9957
20379.8	0.99295	20377.3	0.98179	20377.3	0.98669	20380	0.99709	20379.7	0.99566
20380.2	0.99283	20377.7	0.98153	20377.7	0.98672	20380.4	0.99706	20380.1	0.99562
20380.6	0.99348	20378.1	0.98143	20378.1	0.98679	20380.8	0.99713	20380.5	0.99558
20381	0.99332	20378.5	0.9815	20378.5	0.98683	20381.2	0.99719	20380.9	0.99554
20381.4	0.99311	20378.9	0.98158	20378.9	0.98699	20381.5	0.99717	20381.3	0.9955
20381.8	0.9935	20379.3	0.9814	20379.3	0.987	20381.9	0.9971	20381.6	0.99547
20382.2	0.99379	20379.7	0.9814	20379.7	0.98697	20382.2	0.99721	20382	0.99545
20382.5	0.99361	20380	0.98123	20380	0.98705	20382.6	0.99716	20382.4	0.99544
20382.9	0.9939	20380.4	0.98132	20380.4	0.98707	20382.9	0.99733	20382.8	0.99542
20383.3	0.99358	20380.8	0.98142	20380.8	0.98727	20383.2	0.99725	20383.1	0.99541
20383.7	0.99378	20381.2	0.98176	20381.2	0.98715	20383.5	0.99721	20383.5	0.99539
20384	0.99406	20381.5	0.98214	20381.5	0.98711	20383.8	0.99725	20383.9	0.99538
20384.4	0.99437	20381.9	0.98205	20381.9	0.987	20384.1	0.99735	20384.2	0.99536
20384.7	0.99464	20382.2	0.98231	20382.2	0.98707	20384.5	0.99744	20384.6	0.99535
20385.1	0.99468	20382.6	0.98197	20382.6	0.98706	20384.8	0.99748	20384.9	0.99534
20385.4	0.99444	20382.9	0.98238	20382.9	0.98701	20385.1	0.99753	20385.2	0.99532
20385.7	0.99475	20383.2	0.98246	20383.2	0.98706	20385.5	0.99757	20385.6	0.99531
20386	0.99437	20383.5	0.98269	20383.5	0.98693	20385.8	0.99752	20385.9	0.99531
20386.3	0.99468	20383.8	0.98309	20383.8	0.98669	20386.1	0.99756	20386.2	0.99532
20386.6	0.99493	20384.1	0.98329	20384.1	0.98673	20386.5	0.99751	20386.5	0.99534
20387	0.99484	20384.5	0.98338	20384.5	0.98667	20386.8	0.9975	20386.8	0.99535
20387.3	0.99542	20384.8	0.98409	20384.8	0.9866	20387.1	0.99758	20387.1	0.99537
20387.6	0.995	20385.1	0.98429	20385.1	0.9865	20387.5	0.99753	20387.5	0.99538
20388	0.99562	20385.5	0.98461	20385.5	0.98626	20387.8	0.99759	20387.8	0.9954
20388.3	0.99505	20385.8	0.98486	20385.8	0.98659	20388.2	0.99774	20388.1	0.99541
20388.6	0.99539	20386.1	0.98523	20386.1	0.98621	20388.6	0.99785	20388.5	0.99543
20389	0.99554	20386.5	0.98566	20386.5	0.98586	20389	0.99789	20388.8	0.99544
20389.3	0.99557	20386.8	0.98597	20386.8	0.98584	20389.4	0.99786	20389.2	0.99546
20389.6	0.99578	20387.1	0.98679	20387.1	0.98582	20389.8	0.99789	20389.5	0.99548
20390	0.99571	20387.5	0.98687	20387.5	0.98554	20390.3	0.99792	20389.8	0.99549
20390.3	0.9958	20387.8	0.98742	20387.8	0.98528	20390.7	0.99804	20390.2	0.99552
20390.7	0.99576	20388.2	0.98758	20388.2	0.98551	20391.1	0.99807	20390.6	0.99556
20391.1	0.99637	20388.6	0.98861	20388.6	0.98513	20391.6	0.99818	20390.9	0.9956
20391.5	0.9964	20389	0.98863	20389	0.98468	20392	0.99818	20391.3	0.99564
20391.9	0.99683	20389.4	0.98928	20389.4	0.98473	20392.4	0.99827	20391.8	0.99569
20392.3	0.99653	20389.8	0.9899	20389.8	0.98462	20392.8	0.99825	20392.2	0.99573
20392.8	0.99675	20390.3	0.99045	20390.3	0.98474	20393.2	0.99843	20392.6	0.99577
20393.2	0.99683	20390.7	0.99092	20390.7	0.98498	20393.6	0.99834	20393.1	0.99582
20393.6	0.99675	20391.1	0.99127	20391.1	0.9851	20394	0.99842	20393.5	0.99586
20394.1	0.99691	20391.6	0.99171	20391.6	0.98516	20394.5	0.99847	20393.9	0.99591
20394.5	0.9971	20392	0.992	20392	0.9854	20394.9	0.99873	20394.3	0.99596
20394.9	0.99731	20392.4	0.99253	20392.4	0.9854	20395.3	0.99856	20394.7	0.99605
20395.3	0.9977	20392.8	0.99341	20392.8	0.98555	20395.8	0.99858	20395.1	0.99614
20395.7	0.99764	20393.2	0.99421	20393.2	0.98596	20396.2	0.99875	20395.5	0.99623
20396.1	0.99744	20393.6	0.9947	20393.6	0.98624	20396.6	0.99888	20396	0.99632
20396.5	0.99767	20394	0.99512	20394	0.98653	20397	0.99882	20396.4	0.99642
[truncated: 2,829 more rows]

## Sheet: Fig. 2j
r	MoO3	MoO2	Mo-foil	moox-5	moox-2
0	0.00909	0.05166	0.02746	0.03533	8.47294e-07
0.03068	0.0171	0.05098	0.02682	0.03417	0.00283
0.06136	0.02886	0.04916	0.02493	0.03076	0.00722
0.09204	0.0384	0.04683	0.02193	0.02531	0.01307
0.12272	0.04403	0.04492	0.01811	0.01834	0.01927
0.1534	0.04489	0.04439	0.01402	0.01127	0.02439
0.18408	0.0407	0.04572	0.01092	0.00977	0.02705
0.21476	0.03187	0.04859	0.01095	0.017	0.02631
0.24544	0.01998	0.05213	0.01441	0.02644	0.02219
0.27612	0.01283	0.05535	0.0193	0.03541	0.01742
0.3068	0.02401	0.05752	0.02422	0.04273	0.02013
0.33748	0.0411	0.05829	0.02841	0.04753	0.03235
0.36816	0.05738	0.05774	0.03136	0.04914	0.04767
0.39884	0.0704	0.0564	0.03273	0.04709	0.06174
0.42951	0.07847	0.05518	0.03228	0.04123	0.07155
0.46019	0.08047	0.05506	0.02991	0.03191	0.07484
0.49087	0.07596	0.05667	0.02567	0.02079	0.07025
0.52155	0.06547	0.05985	0.0199	0.01564	0.05801
0.55223	0.05155	0.06377	0.01362	0.0267	0.04202
0.58291	0.04188	0.06732	0.01055	0.04417	0.03725
0.61359	0.04949	0.06957	0.01551	0.06207	0.05766
0.64427	0.07315	0.07014	0.02458	0.07794	0.08884
0.67495	0.1029	0.06955	0.03442	0.08992	0.11929
0.70563	0.13321	0.0695	0.04372	0.0964	0.14278
0.73631	0.16117	0.07291	0.05172	0.09617	0.15504
0.76699	0.18525	0.08267	0.0578	0.08857	0.15396
0.79767	0.20511	0.09977	0.06151	0.07413	0.14163
0.82835	0.22183	0.12308	0.06255	0.05663	0.12957
0.85903	0.23795	0.15056	0.06079	0.05031	0.14325
0.88971	0.25707	0.1802	0.0563	0.07306	0.19899
0.92039	0.28275	0.21025	0.04933	0.11608	0.28597
0.95107	0.31703	0.23933	0.04032	0.16837	0.38934
0.98175	0.35948	0.26648	0.02987	0.22476	0.49793
1.01243	0.40747	0.29127	0.01871	0.28172	0.60258
1.04311	0.4569	0.31392	0.00771	0.33621	0.69524
1.07379	0.50314	0.33528	0.003	0.38539	0.76905
1.10447	0.54153	0.35681	0.01111	0.42668	0.81863
1.13515	0.56784	0.38032	0.01701	0.4579	0.84044
1.16583	0.57849	0.40761	0.01985	0.47735	0.833
1.19651	0.5708	0.43996	0.01923	0.48392	0.79697
1.22718	0.54315	0.47777	0.01496	0.47721	0.735
1.25786	0.49507	0.52044	0.0071	0.45751	0.65143
1.28854	0.4273	0.56642	0.00403	0.42588	0.55184
1.31922	0.34179	0.61352	0.01782	0.38413	0.44251
1.3499	0.2416	0.65922	0.03351	0.33482	0.32987
1.38058	0.1311	0.70092	0.05011	0.28137	0.22022
1.41126	0.02576	0.73618	0.06655	0.22826	0.12101
1.44194	0.11019	0.76285	0.08167	0.18168	0.05774
1.47262	0.22395	0.77919	0.09435	0.14996	0.09423
1.5033	0.32953	0.78394	0.10357	0.14039	0.15953
1.53398	0.4216	0.77638	0.10848	0.15077	0.21914
1.56466	0.49612	0.75632	0.10846	0.17029	0.26938
1.59534	0.55005	0.72408	0.10317	0.18947	0.30946
1.62602	0.5815	0.68049	0.09267	0.2031	0.33858
1.6567	0.58981	0.62675	0.07751	0.20895	0.35563
1.68738	0.57558	0.56442	0.05923	0.20649	0.35939
1.71806	0.54065	0.49532	0.04237	0.19632	0.34903
1.74874	0.48796	0.4214	0.03978	0.17972	0.32449
1.77942	0.42145	0.34468	0.05917	0.15851	0.28685
1.8101	0.34586	0.26716	0.08978	0.13473	0.23841
1.84078	0.26668	0.19073	0.12508	0.11056	0.18269
1.87146	0.19046	0.11713	0.16304	0.08804	0.12415
1.90214	0.12648	0.0479	0.20308	0.06879	0.06823
1.93282	0.09112	0.01632	0.24519	0.05362	0.02535
1.9635	0.09625	0.07311	0.28972	0.04208	0.0346
1.99418	0.1194	0.12277	0.33709	0.03253	0.05867
2.02485	0.13848	0.16454	0.38764	0.02318	0.07081
2.05553	0.14619	0.19807	0.44148	0.0141	0.07045
2.08621	0.14154	0.22325	0.4983	0.01314	0.06315
2.11689	0.12671	0.24013	0.55739	0.02498	0.06263
2.14757	0.10697	0.2489	0.61764	0.04048	0.08185
2.17825	0.09198	0.24991	0.67757	0.05606	0.11517
2.20893	0.09382	0.24361	0.73549	0.06987	0.15133
2.23961	0.11406	0.2306	0.78963	0.08049	0.18246
2.27029	0.14247	0.21159	0.83819	0.08688	0.20328
2.30097	0.16968	0.18744	0.87954	0.08844	0.21045
2.33165	0.1901	0.15918	0.91228	0.08524	0.20255
2.36233	0.2006	0.12813	0.93533	0.0783	0.18015
2.39301	0.19977	0.0962	0.94798	0.07018	0.14592
2.42369	0.1878	0.06701	0.9499	0.06558	0.10498
2.45437	0.16653	0.04954	0.9412	0.06996	0.06716
2.48505	0.14003	0.05589	0.92237	0.08462	0.05352
2.51573	0.11576	0.07827	0.89423	0.10598	0.07083
2.54641	0.10506	0.10384	0.8579	0.12989	0.091
2.57709	0.11513	0.12724	0.81472	0.15332	0.09857
2.60777	0.13894	0.1461	0.76618	0.17426	0.08819
2.63845	0.16477	0.15906	0.7138	0.19148	0.05999
2.66913	0.18452	0.16526	0.65912	0.20443	0.03641
2.69981	0.19361	0.16431	0.60356	0.21328	0.08505
2.73049	0.19008	0.15637	0.54843	0.21885	0.16686
2.76117	0.17488	0.14241	0.49481	0.22255	0.25998
2.79185	0.15403	0.12486	0.44361	0.22614	0.35616
2.82252	0.14299	0.10893	0.39547	0.23132	0.44837
2.8532	0.16372	0.10386	0.35084	0.23924	0.5302
2.88388	0.22087	0.11822	0.30995	0.25006	0.59623
2.91456	0.30137	0.1507	0.27288	0.26293	0.64246
2.94524	0.39313	0.19414	0.23955	0.27626	0.66664
2.97592	0.48781	0.24253	0.20985	0.28815	0.66848
3.0066	0.57897	0.2918	0.18361	0.29675	0.64961
3.03728	0.66127	0.33898	0.16074	0.30054	0.61349
3.06796	0.73023	0.3817	0.14125	0.29845	0.56505
3.09864	0.7823	0.41806	0.12526	0.28993	0.51015
3.12932	0.81498	0.4466	0.11307	0.27496	0.4548
3.16	0.82691	0.46631	0.10497	0.25401	0.40414
3.19068	0.81799	0.47665	0.10102	0.22801	0.36117
3.22136	0.78946	0.47761	0.10086	0.19828	0.32592
3.25204	0.74389	0.46971	0.10364	0.1665	0.29562
3.28272	0.68526	0.45394	0.10824	0.13468	0.26622
3.3134	0.61898	0.43179	0.11348	0.1053	0.23422
3.34408	0.55191	0.4051	0.11832	0.0815	0.19795
3.37476	0.49215	0.37596	0.12188	0.06693	0.15811
3.40544	0.44796	0.34655	0.12346	0.06326	0.1182
3.43612	0.42516	0.31885	0.12249	0.06707	0.08613
3.4668	0.42375	0.29431	0.11856	0.07276	0.07512
3.49748	0.43748	0.27357	0.11138	0.07663	0.08808
3.52816	0.45721	0.25628	0.10079	0.07704	0.10939
3.55884	0.47466	0.24123	0.0868	0.07363	0.12717
3.58952	0.48395	0.22673	0.0696	0.06669	0.13651
3.62019	0.48167	0.21107	0.04971	0.05694	0.13587
3.65087	0.46639	0.19294	0.0288	0.04529	0.12554
3.68155	0.43827	0.17159	0.01777	0.0328	0.10697
3.71223	0.3987	0.14689	0.03536	0.02056	0.08243
3.74291	0.34995	0.11929	0.06183	0.00994	0.05464
3.77359	0.29505	0.08977	0.08973	0.00552	0.0265
3.80427	0.23761	0.05994	0.11727	0.0102	0.00205
3.83495	0.18195	0.03336	0.14332	0.01445	0.02071
3.86563	0.13372	0.02417	0.16693	0.01652	0.03554
3.89631	0.10104	0.04086	0.18726	0.01668	0.0431
3.92699	0.09172	0.06173	0.20362	0.01609	0.04325
3.95767	0.10117	0.0797	0.21546	0.01675	0.03671
3.98835	0.11571	0.09313	0.22246	0.02026	0.02553
4.01903	0.1265	0.10146	0.22452	0.02629	0.01638
4.04971	0.13009	0.10466	0.22177	0.03348	0.02433
4.08039	0.12567	0.10302	0.21462	0.04063	0.04202
4.11107	0.11373	0.09713	0.20369	0.04685	0.06025
4.14175	0.09555	0.08773	0.18985	0.05149	0.07605
4.17243	0.07283	0.07573	0.17412	0.0541	0.0879
4.20311	0.04763	0.06203	0.15768	0.05446	0.09499
4.23379	0.02249	0.04751	0.14172	0.05251	0.09707
4.26447	0.01007	0.03294	0.12735	0.04836	0.09444
4.29515	0.0278	0.01892	0.11546	0.04229	0.08778
4.32583	0.04471	0.00587	0.10653	0.03467	0.07811
4.35651	0.05653	0.00626	0.10065	0.02598	0.06664
4.38719	0.06234	0.01712	0.09761	0.01675	0.0546
4.41786	0.06194	0.02703	0.0972	0.00751	0.0431
4.44854	0.05573	0.03614	0.09951	0.00147	0.03297
4.47922	0.04503	0.04456	0.10485	0.00919	0.02455
4.5099	0.03349	0.05233	0.11357	0.01578	0.01764
4.54058	0.03103	0.05938	0.12572	0.02087	0.01167
4.57126	0.04522	0.06558	0.14082	0.02434	0.00655
4.60194	0.06831	0.07084	0.15802	0.02619	0.00614
4.63262	0.09414	0.07513	0.17617	0.02652	0.01214
4.6633	0.11998	0.07861	0.19403	0.02555	0.01983
4.69398	0.14421	0.08162	0.21041	0.02355	0.02776
4.72466	0.1657	0.08467	0.22421	0.02085	0.03524
4.75534	0.18362	0.08836	0.23451	0.0178	0.04173
4.78602	0.19745	0.0932	0.24058	0.01475	0.04686
4.8167	0.20691	0.09946	0.24196	0.01206	0.0504
4.84738	0.21198	0.10706	0.23841	0.01006	0.05229
4.87806	0.21283	0.11562	0.22994	0.00904	0.05262
4.90874	0.20984	0.12454	0.21681	0.00916	0.0516
4.93942	0.20348	0.13318	0.19948	0.01033	0.04953
4.9701	0.19433	0.14097	0.17859	0.01233	0.04673
5.00078	0.18302	0.14744	0.15493	0.01492	0.04352
5.03146	0.17017	0.15227	0.12939	0.01787	0.04019
5.06214	0.15637	0.15534	0.10297	0.02095	0.03694
5.09282	0.14217	0.15663	0.07677	0.0239	0.03389
5.1235	0.12805	0.15627	0.05233	0.02646	0.03109
5.15418	0.11445	0.15444	0.03284	0.02838	0.02852
5.18486	0.10177	0.15134	0.02675	0.02947	0.02613
5.21553	0.09044	0.14712	0.0369	0.02957	0.02382
5.24621	0.0809	0.14189	0.05187	0.02862	0.02151
5.27689	0.07367	0.13566	0.06624	0.02664	0.01913
5.30757	0.06923	0.12839	0.07863	0.02378	0.01663
5.33825	0.06788	0.11999	0.08872	0.0203	0.01408
5.36893	0.06948	0.1104	0.09655	0.01674	0.01172
5.39961	0.07349	0.09961	0.10234	0.01401	0.0101
5.43029	0.07916	0.08768	0.10636	0.0133	0.01004
5.46097	0.08567	0.07483	0.10893	0.01505	0.01184
5.49165	0.09235	0.06136	0.11035	0.01832	0.0149
5.52233	0.09859	0.04769	0.1109	0.02196	0.01852
5.55301	0.10391	0.03437	0.11081	0.02524	0.02221
5.58369	0.10793	0.02213	0.11026	0.02775	0.02568
5.61437	0.11032	0.0124	0.10937	0.02924	0.02876
5.64505	0.11086	0.00939	0.10824	0.02959	0.03133
5.67573	0.1094	0.01366	0.10691	0.02878	0.03335
5.70641	0.10591	0.01855	0.10536	0.02688	0.03484
5.73709	0.10041	0.02187	0.10354	0.02402	0.03586
5.76777	0.09304	0.02332	0.10137	0.02039	0.03647
5.79845	0.08403	0.02313	0.0987	0.0162	0.03676
5.82913	0.0737	0.02199	0.09537	0.01172	0.03677
5.85981	0.06246	0.02097	0.09122	0.00721	0.03653
5.89049	0.05082	0.0214	0.08611	0.00293	0.03603
5.92117	0.03943	0.02403	0.07998	0.000992494	0.03523
5.95185	0.02929	0.02846	0.0729	0.00412	0.03409
5.98253	0.0221	0.03373	0.06517	0.00647	0.03259
6.0132	0.02015	0.03894	0.05745	0.00792	0.03073
6.04388	0.02331	0.04346	0.05091	0.00839	0.02857
6.07456	0.02862	0.04687	0.04736	0.00789	0.02621
6.10524	0.03393	0.049	0.04847	0.00648	0.02379
6.13592	0.03833	0.04982	0.05449	0.00425	0.02148
6.1666	0.04149	0.04955	0.06405	0.00133	0.01943
6.19728	0.04334	0.0485	0.0754	0.0021	0.01773
6.22796	0.04397	0.04715	0.08711	0.00588	0.01637
6.25864	0.04353	0.04599	0.09814	0.00981	0.01525
6.28932	0.04225	0.0454	0.10774	0.01373	0.01423
6.32	0.04038	0.04555	0.11534	0.01745	0.01318
6.35068	0.03817	0.04627	0.12055	0.02084	0.01205
6.38136	0.0359	0.04719	0.12315	0.02378	0.01096
6.41204	0.03379	0.04781	0.12304	0.02619	0.01018
6.44272	0.03206	0.04767	0.12028	0.02802	0.01006
6.4734	0.03087	0.04642	0.11505	0.02925	0.01082
6.50408	0.03031	0.04386	0.10764	0.02993	0.01229
6.53476	0.03038	0.03995	0.09845	0.0301	0.0141
6.56544	0.03099	0.03487	0.08791	0.02986	0.01588
6.59612	0.03196	0.02904	0.07651	0.02933	0.01736
6.6268	0.03306	0.02338	0.06475	0.02863	0.01834
6.65748	0.03408	0.01967	0.05306	0.02791	0.01875
6.68816	0.03478	0.02016	0.04187	0.02729	0.01861
6.71884	0.03498	0.0249	0.03151	0.02686	0.01803
6.74952	0.0345	0.03181	0.02225	0.02665	0.01725
6.7802	0.03325	0.03921	0.01447	0.02666	0.01656
6.81087	0.03117	0.04614	0.00921	0.02683	0.01626
6.84155	0.02827	0.05204	0.009	0.02709	0.01653
6.87223	0.02463	0.05654	0.01306	0.02735	0.01731
6.90291	0.02042	0.05942	0.01841	0.02754	0.01833
6.93359	0.01601	0.06056	0.02406	0.02763	0.01929
6.96427	0.01212	0.05993	0.02975	0.02759	0.01988
6.99495	0.01031	0.05762	0.0353	0.02744	0.01991
7.02563	0.01197	0.05376	0.04053	0.02719	0.01925
7.05631	0.01604	0.04858	0.04526	0.02688	0.0179
7.08699	0.02094	0.04235	0.04928	0.02651	0.01589
7.11767	0.02585	0.03541	0.05242	0.02608	0.01337
7.14835	0.03038	0.02812	0.05455	0.02554	0.01051
7.17903	0.03429	0.02091	0.0556	0.02484	0.00752
7.20971	0.03743	0.01431	0.05556	0.02391	0.00462
7.24039	0.0397	0.00925	0.05445	0.02266	0.00206
7.27107	0.04103	0.00746	0.05239	0.02103	0.000777522
7.30175	0.04138	0.00909	0.0495	0.01897	0.00204
7.33243	0.04075	0.01151	0.04598	0.01647	0.00306
7.36311	0.03915	0.01328	0.042	0.01355	0.00367
7.39379	0.03664	0.01397	0.03777	0.01031	0.00413
7.42447	0.03329	0.01351	0.03348	0.00697	0.00484
7.45515	0.02921	0.01198	0.02932	0.00433	0.00605
7.48583	0.02457	0.00956	0.02547	0.00469	0.00773
7.51651	0.01961	0.00661	0.02206	0.00773	0.00963
7.54719	0.01472	0.00406	0.01924	0.01137	0.01149
7.57787	0.01071	0.0045	0.01709	0.01493	0.01308
7.60854	0.00919	0.00759	0.01567	0.01819	0.01424
7.63922	0.01104	0.01107	0.01494	0.021	0.01487
7.6699	0.01466	0.01424	0.01486	0.02327	0.01494
7.70058	0.01856	0.01677	0.01534	0.02492	0.01456
7.73126	0.02211	0.01851	0.01631	0.02595	0.01391
7.76194	0.02504	0.01934	0.01773	0.02635	0.01331
7.79262	0.02727	0.01923	0.01956	0.02615	0.01315
7.8233	0.02886	0.01821	0.02174	0.0254	0.01367
7.85398	0.02993	0.01636	0.02417	0.02416	0.0149
7.88466	0.03074	0.0138	0.02673	0.02253	0.01658
7.91534	0.03158	0.01069	0.02926	0.02059	0.01836
7.94602	0.03275	0.00723	0.03158	0.01843	0.01994
7.9767	0.03442	0.00362	0.03351	0.01615	0.02107
8.00738	0.03665	0.000382522	0.03486	0.01383	0.0216
8.03806	0.03929	0.00338	0.0355	0.01158	0.02146
8.06874	0.04208	0.00635	0.03529	0.00948	0.02063
8.09942	0.04474	0.00881	0.03419	0.00765	0.01914
8.1301	0.04695	0.01067	0.03216	0.00622	0.01709
8.16078	0.04848	0.01188	0.0293	0.00531	0.0146
8.19146	0.04912	0.01242	0.02576	0.00496	0.01184
8.22214	0.04879	0.01233	0.02187	0.00501	0.00899
8.25282	0.04744	0.01169	0.01822	0.00522	0.00634
8.2835	0.04512	0.01059	0.01582	0.00538	0.00441
8.31418	0.04197	0.00916	0.01584	0.00537	0.00406
8.34486	0.03819	0.00757	0.01847	0.00517	0.0052
8.37554	0.03402	0.006	0.02276	0.00483	0.00674
8.40621	0.02977	0.00469	0.0277	0.00448	0.00811
8.43689	0.02576	0.00391	0.03269	0.00438	0.00914
8.46757	0.02231	0.0038	0.03739	0.0048	0.00974
8.49825	0.01961	0.00412	0.04162	0.00579	0.0099
8.52893	0.01767	0.0045	0.0453	0.0072	0.00964
8.55961	0.01627	0.00474	0.04843	0.00882	0.009
8.59029	0.01505	0.00473	0.05107	0.01049	0.00805
8.62097	0.01364	0.00449	0.05329	0.01207	0.0069
8.65165	0.01179	0.00408	0.05519	0.01346	0.00578
8.68233	0.00943	0.00363	0.05683	0.01458	0.00505
8.71301	0.00681	0.00337	0.05828	0.01537	0.00519
8.74369	0.00502	0.00351	0.05952	0.01578	0.00625
8.77437	0.00625	0.00411	0.06054	0.01581	0.00788
8.80505	0.00987	0.005	0.06127	0.01546	0.0097
8.83573	0.01425	0.00601	0.06162	0.01475	0.01149
8.86641	0.01869	0.00703	0.06151	0.01372	0.01309
8.89709	0.02287	0.00799	0.06085	0.01243	0.01438
8.92777	0.02653	0.00886	0.05959	0.01095	0.01529
8.95845	0.02949	0.00962	0.0577	0.00936	0.01575
8.98913	0.03163	0.0103	0.0552	0.00775	0.01576
9.01981	0.03287	0.0109	0.05211	0.00619	0.01531
9.05049	0.0332	0.01146	0.04852	0.00479	0.01443
9.08117	0.03264	0.01198	0.04451	0.00364	0.01317
9.11185	0.03129	0.01249	0.0402	0.00281	0.01162
9.14253	0.02929	0.01298	0.03572	0.00236	0.00986
9.17321	0.0268	0.01344	0.03122	0.00219	0.008
9.20388	0.02405	0.01385	0.02689	0.00213	0.00614
9.23456	0.02127	0.01419	0.02293	0.00202	0.00442
9.26524	0.01872	0.01443	0.01962	0.00184	0.00295
9.29592	0.0166	0.01454	0.01726	0.00162	0.00192
9.3266	0.01507	0.01453	0.01612	0.00151	0.00157
9.35728	0.01411	0.01438	0.01626	0.00169	0.00176
9.38796	0.01356	0.0141	0.01739	0.00216	0.00206
9.41864	0.01315	0.0137	0.01912	0.00279	0.0023
9.44932	0.01265	0.01321	0.02109	0.00348	0.00251
9.48	0.01186	0.01265	0.02305	0.00413	0.00279
9.51068	0.0107	0.01205	0.02487	0.0047	0.00322
9.54136	0.00912	0.01143	0.02644	0.00514	0.00378
9.57204	0.00715	0.01082	0.02773	0.00544	0.00441
9.60272	0.00485	0.01022	0.02871	0.00558	0.00504
9.6334	0.00233	0.00961	0.0294	0.00557	0.0056
9.66408	0.000736484	0.009	0.0298	0.00541	0.00604
9.69476	0.00327	0.00836	0.02994	0.00514	0.00636
9.72544	0.00596	0.00767	0.02984	0.00478	0.00653
9.75612	0.00852	0.00695	0.02953	0.00438	0.0066
9.7868	0.01087	0.00621	0.02905	0.00399	0.00659
9.81748	0.01295	0.00553	0.02841	0.00367	0.00655
9.84816	0.0147	0.00503	0.02763	0.00345	0.00649
9.87884	0.01612	0.00486	0.02672	0.00335	0.00645
9.90952	0.01719	0.00514	0.0257	0.00335	0.00642
9.9402	0.01795	0.00583	0.02458	0.0034	0.0064
9.97088	0.01842	0.00679	0.02335	0.00348	0.00635

## Sheet: Fig. 2l-p
K	R	Mofoil	K	R	MoO2	K	R	MoO3	K	R	moox-5	K	R	moox-2
-10	0.01	0.00345	-10	0.01	0.0034	-10	0.01	0.00206	-10	0.01	0.00101	-10	0.01	0.00126
-9.95	0.01	0.00343	-9.95	0.01	0.00342	-9.95	0.01	0.00207	-9.95	0.01	0.00114	-9.95	0.01	0.00124
-9.9	0.01	0.0034	-9.9	0.01	0.00344	-9.9	0.01	0.00208	-9.9	0.01	0.00129	-9.9	0.01	0.00121
-9.85	0.01	0.00337	-9.85	0.01	0.00345	-9.85	0.01	0.00209	-9.85	0.01	0.00145	-9.85	0.01	0.00117
-9.8	0.01	0.00335	-9.8	0.01	0.00346	-9.8	0.01	0.00208	-9.8	0.01	0.00161	-9.8	0.01	0.00116
-9.75	0.01	0.00333	-9.75	0.01	0.00346	-9.75	0.01	0.00206	-9.75	0.01	0.00173	-9.75	0.01	0.00117
-9.7	0.01	0.00332	-9.7	0.01	0.00347	-9.7	0.01	0.00205	-9.7	0.01	0.00181	-9.7	0.01	0.00121
-9.65	0.01	0.00331	-9.65	0.01	0.00347	-9.65	0.01	0.00206	-9.65	0.01	0.00183	-9.65	0.01	0.00127
-9.6	0.01	0.00331	-9.6	0.01	0.00346	-9.6	0.01	0.0021	-9.6	0.01	0.00181	-9.6	0.01	0.00133
-9.55	0.01	0.00331	-9.55	0.01	0.00345	-9.55	0.01	0.00215	-9.55	0.01	0.00175	-9.55	0.01	0.00138
-9.5	0.01	0.00331	-9.5	0.01	0.00343	-9.5	0.01	0.00221	-9.5	0.01	0.00164	-9.5	0.01	0.00141
-9.45	0.01	0.00331	-9.45	0.01	0.00341	-9.45	0.01	0.00224	-9.45	0.01	0.00148	-9.45	0.01	0.00142
-9.4	0.01	0.00331	-9.4	0.01	0.00338	-9.4	0.01	0.00226	-9.4	0.01	0.00129	-9.4	0.01	0.0014
-9.35	0.01	0.00332	-9.35	0.01	0.00335	-9.35	0.01	0.00225	-9.35	0.01	0.00106	-9.35	0.01	0.00135
-9.3	0.01	0.00333	-9.3	0.01	0.00333	-9.3	0.01	0.0022	-9.3	0.01	0.000802	-9.3	0.01	0.00126
-9.25	0.01	0.00336	-9.25	0.01	0.0033	-9.25	0.01	0.00212	-9.25	0.01	0.000532	-9.25	0.01	0.00115
-9.2	0.01	0.0034	-9.2	0.01	0.00328	-9.2	0.01	0.00201	-9.2	0.01	0.000266	-9.2	0.01	0.001
-9.15	0.01	0.00345	-9.15	0.01	0.00327	-9.15	0.01	0.00186	-9.15	0.01	5.6e-05	-9.15	0.01	0.000824
-9.1	0.01	0.00351	-9.1	0.01	0.00326	-9.1	0.01	0.00168	-9.1	0.01	0.000237	-9.1	0.01	0.000612
-9.05	0.01	0.00356	-9.05	0.01	0.00325	-9.05	0.01	0.00145	-9.05	0.01	0.000424	-9.05	0.01	0.000383
-9	0.01	0.0036	-9	0.01	0.00325	-9	0.01	0.0012	-9	0.01	0.000561	-9	0.01	0.000173
-8.95	0.01	0.00363	-8.95	0.01	0.00324	-8.95	0.01	0.000921	-8.95	0.01	0.000653	-8.95	0.01	0.000117
-8.9	0.01	0.00364	-8.9	0.01	0.00323	-8.9	0.01	0.000656	-8.9	0.01	0.000699	-8.9	0.01	0.000202
-8.85	0.01	0.00364	-8.85	0.01	0.00323	-8.85	0.01	0.000436	-8.85	0.01	0.0007	-8.85	0.01	0.0002
-8.8	0.01	0.00361	-8.8	0.01	0.00322	-8.8	0.01	0.000303	-8.8	0.01	0.000669	-8.8	0.01	0.000112
-8.75	0.01	0.00357	-8.75	0.01	0.00321	-8.75	0.01	0.000296	-8.75	0.01	0.000614	-8.75	0.01	0.000205
-8.7	0.01	0.00352	-8.7	0.01	0.00321	-8.7	0.01	0.000397	-8.7	0.01	0.000537	-8.7	0.01	0.000486
-8.65	0.01	0.00347	-8.65	0.01	0.00321	-8.65	0.01	0.000591	-8.65	0.01	0.000458	-8.65	0.01	0.00082
-8.6	0.01	0.00343	-8.6	0.01	0.0032	-8.6	0.01	0.000856	-8.6	0.01	0.000382	-8.6	0.01	0.00114
-8.55	0.01	0.00339	-8.55	0.01	0.0032	-8.55	0.01	0.00116	-8.55	0.01	0.000323	-8.55	0.01	0.0014
-8.5	0.01	0.00336	-8.5	0.01	0.0032	-8.5	0.01	0.00145	-8.5	0.01	0.000297	-8.5	0.01	0.00154
-8.45	0.01	0.00334	-8.45	0.01	0.0032	-8.45	0.01	0.00165	-8.45	0.01	0.000318	-8.45	0.01	0.00159
-8.4	0.01	0.00331	-8.4	0.01	0.00319	-8.4	0.01	0.00174	-8.4	0.01	0.000384	-8.4	0.01	0.00155
-8.35	0.01	0.00329	-8.35	0.01	0.0032	-8.35	0.01	0.00174	-8.35	0.01	0.00049	-8.35	0.01	0.00141
-8.3	0.01	0.00327	-8.3	0.01	0.0032	-8.3	0.01	0.00165	-8.3	0.01	0.000617	-8.3	0.01	0.00117
-8.25	0.01	0.00327	-8.25	0.01	0.00321	-8.25	0.01	0.00145	-8.25	0.01	0.000747	-8.25	0.01	0.000785
-8.2	0.01	0.00327	-8.2	0.01	0.00322	-8.2	0.01	0.00114	-8.2	0.01	0.000872	-8.2	0.01	0.000299
-8.15	0.01	0.00328	-8.15	0.01	0.00323	-8.15	0.01	0.000696	-8.15	0.01	0.000984	-8.15	0.01	0.000274
-8.1	0.01	0.0033	-8.1	0.01	0.00324	-8.1	0.01	0.000225	-8.1	0.01	0.00107	-8.1	0.01	0.000748
-8.05	0.01	0.00332	-8.05	0.01	0.00326	-8.05	0.01	0.000441	-8.05	0.01	0.00112	-8.05	0.01	0.00117
-8	0.01	0.00335	-8	0.01	0.00328	-8	0.01	0.00091	-8	0.01	0.00113	-8	0.01	0.00148
-7.95	0.01	0.00338	-7.95	0.01	0.00329	-7.95	0.01	0.00131	-7.95	0.01	0.00108	-7.95	0.01	0.00167
-7.9	0.01	0.00341	-7.9	0.01	0.00331	-7.9	0.01	0.00158	-7.9	0.01	0.000966	-7.9	0.01	0.00175
-7.85	0.01	0.00344	-7.85	0.01	0.00332	-7.85	0.01	0.00173	-7.85	0.01	0.000776	-7.85	0.01	0.00176
-7.8	0.01	0.00347	-7.8	0.01	0.00334	-7.8	0.01	0.00177	-7.8	0.01	0.00051	-7.8	0.01	0.0017
-7.75	0.01	0.0035	-7.75	0.01	0.00335	-7.75	0.01	0.00175	-7.75	0.01	0.000202	-7.75	0.01	0.00157
-7.7	0.01	0.00352	-7.7	0.01	0.00335	-7.7	0.01	0.00165	-7.7	0.01	0.000135	-7.7	0.01	0.00132
-7.65	0.01	0.00354	-7.65	0.01	0.00335	-7.65	0.01	0.00145	-7.65	0.01	0.000466	-7.65	0.01	0.000949
-7.6	0.01	0.00355	-7.6	0.01	0.00335	-7.6	0.01	0.00113	-7.6	0.01	0.000796	-7.6	0.01	0.000521
-7.55	0.01	0.00355	-7.55	0.01	0.00334	-7.55	0.01	0.000717	-7.55	0.01	0.00112	-7.55	0.01	0.000117
-7.5	0.01	0.00354	-7.5	0.01	0.00332	-7.5	0.01	0.000284	-7.5	0.01	0.00142	-7.5	0.01	0.000396
-7.45	0.01	0.00352	-7.45	0.01	0.00331	-7.45	0.01	0.000294	-7.45	0.01	0.00169	-7.45	0.01	0.000794
-7.4	0.01	0.0035	-7.4	0.01	0.0033	-7.4	0.01	0.000715	-7.4	0.01	0.00191	-7.4	0.01	0.00115
-7.35	0.01	0.00347	-7.35	0.01	0.00329	-7.35	0.01	0.00112	-7.35	0.01	0.00208	-7.35	0.01	0.00144
-7.3	0.01	0.00344	-7.3	0.01	0.00328	-7.3	0.01	0.00148	-7.3	0.01	0.00216	-7.3	0.01	0.00163
-7.25	0.01	0.0034	-7.25	0.01	0.00328	-7.25	0.01	0.00175	-7.25	0.01	0.00215	-7.25	0.01	0.0017
-7.2	0.01	0.00337	-7.2	0.01	0.00328	-7.2	0.01	0.00191	-7.2	0.01	0.00208	-7.2	0.01	0.00164
-7.15	0.01	0.00334	-7.15	0.01	0.00328	-7.15	0.01	0.00195	-7.15	0.01	0.00196	-7.15	0.01	0.00144
-7.1	0.01	0.00332	-7.1	0.01	0.00328	-7.1	0.01	0.00184	-7.1	0.01	0.00184	-7.1	0.01	0.00114
-7.05	0.01	0.00331	-7.05	0.01	0.00328	-7.05	0.01	0.0016	-7.05	0.01	0.00172	-7.05	0.01	0.000787
-7	0.01	0.00331	-7	0.01	0.00327	-7	0.01	0.00128	-7	0.01	0.00161	-7	0.01	0.000514
-6.95	0.01	0.00331	-6.95	0.01	0.00327	-6.95	0.01	0.000975	-6.95	0.01	0.00152	-6.95	0.01	0.0004
-6.9	0.01	0.00332	-6.9	0.01	0.00327	-6.9	0.01	0.0008	-6.9	0.01	0.00144	-6.9	0.01	0.000461
-6.85	0.01	0.00334	-6.85	0.01	0.00326	-6.85	0.01	0.000788	-6.85	0.01	0.00136	-6.85	0.01	0.000741
-6.8	0.01	0.00336	-6.8	0.01	0.00326	-6.8	0.01	0.000992	-6.8	0.01	0.00129	-6.8	0.01	0.00121
-6.75	0.01	0.00338	-6.75	0.01	0.00326	-6.75	0.01	0.0014	-6.75	0.01	0.0012	-6.75	0.01	0.00176
-6.7	0.01	0.0034	-6.7	0.01	0.00325	-6.7	0.01	0.00196	-6.7	0.01	0.00107	-6.7	0.01	0.00234
-6.65	0.01	0.00342	-6.65	0.01	0.00325	-6.65	0.01	0.00256	-6.65	0.01	0.000908	-6.65	0.01	0.00289
-6.6	0.01	0.00344	-6.6	0.01	0.00325	-6.6	0.01	0.00315	-6.6	0.01	0.000725	-6.6	0.01	0.00332
-6.55	0.01	0.00345	-6.55	0.01	0.00325	-6.55	0.01	0.00365	-6.55	0.01	0.000526	-6.55	0.01	0.00351
-6.5	0.01	0.00346	-6.5	0.01	0.00325	-6.5	0.01	0.00397	-6.5	0.01	0.000319	-6.5	0.01	0.00344
-6.45	0.01	0.00347	-6.45	0.01	0.00325	-6.45	0.01	0.00403	-6.45	0.01	0.000123	-6.45	0.01	0.00317
-6.4	0.01	0.00348	-6.4	0.01	0.00325	-6.4	0.01	0.00384	-6.4	0.01	0.000132	-6.4	0.01	0.00276
-6.35	0.01	0.00349	-6.35	0.01	0.00325	-6.35	0.01	0.0035	-6.35	0.01	0.000323	-6.35	0.01	0.00224
-6.3	0.01	0.00349	-6.3	0.01	0.00325	-6.3	0.01	0.00303	-6.3	0.01	0.000516	-6.3	0.01	0.00161
-6.25	0.01	0.00349	-6.25	0.01	0.00325	-6.25	0.01	0.00244	-6.25	0.01	0.000712	-6.25	0.01	0.000935
-6.2	0.01	0.00348	-6.2	0.01	0.00326	-6.2	0.01	0.00177	-6.2	0.01	0.000904	-6.2	0.01	0.000309
-6.15	0.01	0.00347	-6.15	0.01	0.00327	-6.15	0.01	0.00111	-6.15	0.01	0.00108	-6.15	0.01	0.000342
-6.1	0.01	0.00346	-6.1	0.01	0.00328	-6.1	0.01	0.00052	-6.1	0.01	0.00123	-6.1	0.01	0.000829
-6.05	0.01	0.00345	-6.05	0.01	0.00329	-6.05	0.01	0.000226	-6.05	0.01	0.00135	-6.05	0.01	0.00125
-6	0.01	0.00344	-6	0.01	0.00331	-6	0.01	0.000562	-6	0.01	0.00141	-6	0.01	0.00158
-5.95	0.01	0.00343	-5.95	0.01	0.00332	-5.95	0.01	0.000914	-5.95	0.01	0.00143	-5.95	0.01	0.00181
-5.9	0.01	0.00342	-5.9	0.01	0.00333	-5.9	0.01	0.00119	-5.9	0.01	0.00141	-5.9	0.01	0.00193
-5.85	0.01	0.0034	-5.85	0.01	0.00333	-5.85	0.01	0.00136	-5.85	0.01	0.00135	-5.85	0.01	0.0019
-5.8	0.01	0.0034	-5.8	0.01	0.00333	-5.8	0.01	0.00138	-5.8	0.01	0.00126	-5.8	0.01	0.00174
-5.75	0.01	0.00339	-5.75	0.01	0.00332	-5.75	0.01	0.00127	-5.75	0.01	0.00115	-5.75	0.01	0.00144
-5.7	0.01	0.00339	-5.7	0.01	0.00332	-5.7	0.01	0.00102	-5.7	0.01	0.00103	-5.7	0.01	0.00105
-5.65	0.01	0.00339	-5.65	0.01	0.00331	-5.65	0.01	0.000675	-5.65	0.01	0.000894	-5.65	0.01	0.000632
-5.6	0.01	0.00339	-5.6	0.01	0.00329	-5.6	0.01	0.00031	-5.6	0.01	0.000736	-5.6	0.01	0.000249
-5.55	0.01	0.00339	-5.55	0.01	0.00328	-5.55	0.01	0.000279	-5.55	0.01	0.000567	-5.55	0.01	0.000171
-5.5	0.01	0.00339	-5.5	0.01	0.00327	-5.5	0.01	0.000568	-5.5	0.01	0.000388	-5.5	0.01	0.000335
-5.45	0.01	0.00339	-5.45	0.01	0.00327	-5.45	0.01	0.000769	-5.45	0.01	0.000215	-5.45	0.01	0.000397
-5.4	0.01	0.00339	-5.4	0.01	0.00326	-5.4	0.01	0.000852	-5.4	0.01	6.6e-05	-5.4	0.01	0.000357
-5.35	0.01	0.00339	-5.35	0.01	0.00326	-5.35	0.01	0.000831	-5.35	0.01	0.000128	-5.35	0.01	0.000246
-5.3	0.01	0.0034	-5.3	0.01	0.00326	-5.3	0.01	0.000709	-5.3	0.01	0.000259	-5.3	0.01	0.000131
-5.25	0.01	0.00341	-5.25	0.01	0.00326	-5.25	0.01	0.000528	-5.25	0.01	0.000384	-5.25	0.01	0.000219
-5.2	0.01	0.00342	-5.2	0.01	0.00326	-5.2	0.01	0.000339	-5.2	0.01	0.000515	-5.2	0.01	0.000327
-5.15	0.01	0.00343	-5.15	0.01	0.00327	-5.15	0.01	0.000241	-5.15	0.01	0.000662	-5.15	0.01	0.000372
-5.1	0.01	0.00344	-5.1	0.01	0.00327	-5.1	0.01	0.000215	-5.1	0.01	0.000831	-5.1	0.01	0.000359
-5.05	0.01	0.00345	-5.05	0.01	0.00327	-5.05	0.01	0.000214	-5.05	0.01	0.00102	-5.05	0.01	0.000253
-5	0.01	0.00345	-5	0.01	0.00328	-5	0.01	0.000231	-5	0.01	0.00123	-5	0.01	0.000129
-4.95	0.01	0.00345	-4.95	0.01	0.00328	-4.95	0.01	0.000363	-4.95	0.01	0.00142	-4.95	0.01	0.000433
-4.9	0.01	0.00345	-4.9	0.01	0.00328	-4.9	0.01	0.00068	-4.9	0.01	0.0016	-4.9	0.01	0.000937
-4.85	0.01	0.00344	-4.85	0.01	0.00328	-4.85	0.01	0.00115	-4.85	0.01	0.00172	-4.85	0.01	0.00148
-4.8	0.01	0.00344	-4.8	0.01	0.00328	-4.8	0.01	0.00168	-4.8	0.01	0.00179	-4.8	0.01	0.00198
-4.75	0.01	0.00343	-4.75	0.01	0.00328	-4.75	0.01	0.00219	-4.75	0.01	0.00183	-4.75	0.01	0.00236
-4.7	0.01	0.00343	-4.7	0.01	0.00328	-4.7	0.01	0.00258	-4.7	0.01	0.00185	-4.7	0.01	0.00261
-4.65	0.01	0.00342	-4.65	0.01	0.00328	-4.65	0.01	0.00284	-4.65	0.01	0.00186	-4.65	0.01	0.00271
-4.6	0.01	0.00342	-4.6	0.01	0.00328	-4.6	0.01	0.00298	-4.6	0.01	0.00186	-4.6	0.01	0.0027
-4.55	0.01	0.00342	-4.55	0.01	0.00327	-4.55	0.01	0.00297	-4.55	0.01	0.00182	-4.55	0.01	0.00261
-4.5	0.01	0.00342	-4.5	0.01	0.00327	-4.5	0.01	0.00292	-4.5	0.01	0.00177	-4.5	0.01	0.0025
-4.45	0.01	0.00342	-4.45	0.01	0.00327	-4.45	0.01	0.00282	-4.45	0.01	0.00169	-4.45	0.01	0.00236
-4.4	0.01	0.00342	-4.4	0.01	0.00327	-4.4	0.01	0.00272	-4.4	0.01	0.00159	-4.4	0.01	0.0022
-4.35	0.01	0.00342	-4.35	0.01	0.00327	-4.35	0.01	0.00259	-4.35	0.01	0.0015	-4.35	0.01	0.00204
-4.3	0.01	0.00341	-4.3	0.01	0.00327	-4.3	0.01	0.00246	-4.3	0.01	0.00142	-4.3	0.01	0.00191
-4.25	0.01	0.00341	-4.25	0.01	0.00327	-4.25	0.01	0.00236	-4.25	0.01	0.00137	-4.25	0.01	0.00182
-4.2	0.01	0.00341	-4.2	0.01	0.00327	-4.2	0.01	0.00229	-4.2	0.01	0.00133	-4.2	0.01	0.00176
-4.15	0.01	0.00341	-4.15	0.01	0.00327	-4.15	0.01	0.00225	-4.15	0.01	0.00131	-4.15	0.01	0.00173
-4.1	0.01	0.00341	-4.1	0.01	0.00327	-4.1	0.01	0.00224	-4.1	0.01	0.0013	-4.1	0.01	0.00172
-4.05	0.01	0.00341	-4.05	0.01	0.00327	-4.05	0.01	0.00223	-4.05	0.01	0.0013	-4.05	0.01	0.00172
-4	0.01	0.00341	-4	0.01	0.00327	-4	0.01	0.00223	-4	0.01	0.0013	-4	0.01	0.00171
-3.95	0.01	0.00341	-3.95	0.01	0.00327	-3.95	0.01	0.00223	-3.95	0.01	0.0013	-3.95	0.01	0.00171
-3.9	0.01	0.00341	-3.9	0.01	0.00327	-3.9	0.01	0.00223	-3.9	0.01	0.0013	-3.9	0.01	0.00171
-3.85	0.01	0.00341	-3.85	0.01	0.00327	-3.85	0.01	0.00223	-3.85	0.01	0.0013	-3.85	0.01	0.00172
-3.8	0.01	0.00341	-3.8	0.01	0.00327	-3.8	0.01	0.00223	-3.8	0.01	0.0013	-3.8	0.01	0.00172
-3.75	0.01	0.00341	-3.75	0.01	0.00327	-3.75	0.01	0.00224	-3.75	0.01	0.0013	-3.75	0.01	0.00172
-3.7	0.01	0.00342	-3.7	0.01	0.00327	-3.7	0.01	0.00225	-3.7	0.01	0.0013	-3.7	0.01	0.00173
-3.65	0.01	0.00342	-3.65	0.01	0.00327	-3.65	0.01	0.00226	-3.65	0.01	0.0013	-3.65	0.01	0.00175
-3.6	0.01	0.00342	-3.6	0.01	0.00327	-3.6	0.01	0.00229	-3.6	0.01	0.0013	-3.6	0.01	0.00178
-3.55	0.01	0.00342	-3.55	0.01	0.00327	-3.55	0.01	0.00233	-3.55	0.01	0.0013	-3.55	0.01	0.0018
-3.5	0.01	0.00342	-3.5	0.01	0.00327	-3.5	0.01	0.00236	-3.5	0.01	0.0013	-3.5	0.01	0.00181
-3.45	0.01	0.00342	-3.45	0.01	0.00327	-3.45	0.01	0.00236	-3.45	0.01	0.0013	-3.45	0.01	0.00181
-3.4	0.01	0.00342	-3.4	0.01	0.00327	-3.4	0.01	0.00236	-3.4	0.01	0.0013	-3.4	0.01	0.00181
-3.35	0.01	0.00342	-3.35	0.01	0.00327	-3.35	0.01	0.00236	-3.35	0.01	0.0013	-3.35	0.01	0.00181
-3.3	0.01	0.00342	-3.3	0.01	0.00327	-3.3	0.01	0.00236	-3.3	0.01	0.0013	-3.3	0.01	0.00181
-3.25	0.01	0.00342	-3.25	0.01	0.00327	-3.25	0.01	0.00236	-3.25	0.01	0.0013	-3.25	0.01	0.00181
-3.2	0.01	0.00342	-3.2	0.01	0.00327	-3.2	0.01	0.00236	-3.2	0.01	0.0013	-3.2	0.01	0.00181
-3.15	0.01	0.00342	-3.15	0.01	0.00327	-3.15	0.01	0.00236	-3.15	0.01	0.0013	-3.15	0.01	0.00181
-3.1	0.01	0.00342	-3.1	0.01	0.00327	-3.1	0.01	0.00236	-3.1	0.01	0.0013	-3.1	0.01	0.00181
-3.05	0.01	0.00342	-3.05	0.01	0.00327	-3.05	0.01	0.00236	-3.05	0.01	0.0013	-3.05	0.01	0.00181
-3	0.01	0.00342	-3	0.01	0.00327	-3	0.01	0.00236	-3	0.01	0.0013	-3	0.01	0.00181
-2.95	0.01	0.00342	-2.95	0.01	0.00327	-2.95	0.01	0.00236	-2.95	0.01	0.0013	-2.95	0.01	0.00181
-2.9	0.01	0.00342	-2.9	0.01	0.00327	-2.9	0.01	0.00236	-2.9	0.01	0.0013	-2.9	0.01	0.00181
-2.85	0.01	0.00342	-2.85	0.01	0.00327	-2.85	0.01	0.00236	-2.85	0.01	0.0013	-2.85	0.01	0.00181
-2.8	0.01	0.00342	-2.8	0.01	0.00327	-2.8	0.01	0.00236	-2.8	0.01	0.0013	-2.8	0.01	0.00181
-2.75	0.01	0.00342	-2.75	0.01	0.00327	-2.75	0.01	0.00236	-2.75	0.01	0.0013	-2.75	0.01	0.00181
-2.7	0.01	0.00342	-2.7	0.01	0.00327	-2.7	0.01	0.00236	-2.7	0.01	0.0013	-2.7	0.01	0.00181
-2.65	0.01	0.00342	-2.65	0.01	0.00327	-2.65	0.01	0.00236	-2.65	0.01	0.0013	-2.65	0.01	0.00181
-2.6	0.01	0.00342	-2.6	0.01	0.00327	-2.6	0.01	0.00236	-2.6	0.01	0.0013	-2.6	0.01	0.00181
-2.55	0.01	0.00342	-2.55	0.01	0.00327	-2.55	0.01	0.00236	-2.55	0.01	0.0013	-2.55	0.01	0.00181
-2.5	0.01	0.00342	-2.5	0.01	0.00327	-2.5	0.01	0.00236	-2.5	0.01	0.0013	-2.5	0.01	0.00181
-2.45	0.01	0.00342	-2.45	0.01	0.00327	-2.45	0.01	0.00236	-2.45	0.01	0.0013	-2.45	0.01	0.00181
-2.4	0.01	0.00342	-2.4	0.01	0.00327	-2.4	0.01	0.00236	-2.4	0.01	0.0013	-2.4	0.01	0.00181
-2.35	0.01	0.00342	-2.35	0.01	0.00327	-2.35	0.01	0.00236	-2.35	0.01	0.0013	-2.35	0.01	0.00181
-2.3	0.01	0.00342	-2.3	0.01	0.00327	-2.3	0.01	0.00236	-2.3	0.01	0.0013	-2.3	0.01	0.00181
-2.25	0.01	0.00342	-2.25	0.01	0.00327	-2.25	0.01	0.00236	-2.25	0.01	0.0013	-2.25	0.01	0.00181
-2.2	0.01	0.00342	-2.2	0.01	0.00327	-2.2	0.01	0.00236	-2.2	0.01	0.0013	-2.2	0.01	0.00181
-2.15	0.01	0.00342	-2.15	0.01	0.00327	-2.15	0.01	0.00236	-2.15	0.01	0.0013	-2.15	0.01	0.00181
-2.1	0.01	0.00342	-2.1	0.01	0.00327	-2.1	0.01	0.00236	-2.1	0.01	0.0013	-2.1	0.01	0.00181
-2.05	0.01	0.00342	-2.05	0.01	0.00327	-2.05	0.01	0.00236	-2.05	0.01	0.0013	-2.05	0.01	0.00181
-2	0.01	0.00342	-2	0.01	0.00327	-2	0.01	0.00236	-2	0.01	0.0013	-2	0.01	0.00181
-1.95	0.01	0.00342	-1.95	0.01	0.00327	-1.95	0.01	0.00236	-1.95	0.01	0.0013	-1.95	0.01	0.00181
-1.9	0.01	0.00342	-1.9	0.01	0.00327	-1.9	0.01	0.00236	-1.9	0.01	0.0013	-1.9	0.01	0.00181
-1.85	0.01	0.00342	-1.85	0.01	0.00327	-1.85	0.01	0.00236	-1.85	0.01	0.0013	-1.85	0.01	0.00181
-1.8	0.01	0.00342	-1.8	0.01	0.00327	-1.8	0.01	0.00236	-1.8	0.01	0.0013	-1.8	0.01	0.00181
-1.75	0.01	0.00342	-1.75	0.01	0.00327	-1.75	0.01	0.00236	-1.75	0.01	0.0013	-1.75	0.01	0.00181
-1.7	0.01	0.00342	-1.7	0.01	0.00327	-1.7	0.01	0.00236	-1.7	0.01	0.0013	-1.7	0.01	0.00181
-1.65	0.01	0.00342	-1.65	0.01	0.00327	-1.65	0.01	0.00236	-1.65	0.01	0.0013	-1.65	0.01	0.00181
-1.6	0.01	0.00342	-1.6	0.01	0.00327	-1.6	0.01	0.00236	-1.6	0.01	0.0013	-1.6	0.01	0.00181
-1.55	0.01	0.00342	-1.55	0.01	0.00327	-1.55	0.01	0.00236	-1.55	0.01	0.0013	-1.55	0.01	0.00181
-1.5	0.01	0.00342	-1.5	0.01	0.00327	-1.5	0.01	0.00236	-1.5	0.01	0.0013	-1.5	0.01	0.00181
-1.45	0.01	0.00342	-1.45	0.01	0.00327	-1.45	0.01	0.00236	-1.45	0.01	0.0013	-1.45	0.01	0.00181
-1.4	0.01	0.00342	-1.4	0.01	0.00327	-1.4	0.01	0.00236	-1.4	0.01	0.0013	-1.4	0.01	0.00181
-1.35	0.01	0.00342	-1.35	0.01	0.00327	-1.35	0.01	0.00236	-1.35	0.01	0.0013	-1.35	0.01	0.00181
-1.3	0.01	0.00342	-1.3	0.01	0.00327	-1.3	0.01	0.00236	-1.3	0.01	0.0013	-1.3	0.01	0.00181
-1.25	0.01	0.00342	-1.25	0.01	0.00327	-1.25	0.01	0.00236	-1.25	0.01	0.0013	-1.25	0.01	0.00181
-1.2	0.01	0.00342	-1.2	0.01	0.00327	-1.2	0.01	0.00236	-1.2	0.01	0.0013	-1.2	0.01	0.00181
-1.15	0.01	0.00342	-1.15	0.01	0.00327	-1.15	0.01	0.00236	-1.15	0.01	0.0013	-1.15	0.01	0.00181
-1.1	0.01	0.00342	-1.1	0.01	0.00327	-1.1	0.01	0.00236	-1.1	0.01	0.0013	-1.1	0.01	0.00181
-1.05	0.01	0.00342	-1.05	0.01	0.00327	-1.05	0.01	0.00236	-1.05	0.01	0.0013	-1.05	0.01	0.00181
-1	0.01	0.00342	-1	0.01	0.00327	-1	0.01	0.00236	-1	0.01	0.0013	-1	0.01	0.00181
-0.95	0.01	0.00342	-0.95	0.01	0.00327	-0.95	0.01	0.00236	-0.95	0.01	0.0013	-0.95	0.01	0.00181
-0.9	0.01	0.00342	-0.9	0.01	0.00327	-0.9	0.01	0.00236	-0.9	0.01	0.0013	-0.9	0.01	0.00181
-0.85	0.01	0.00342	-0.85	0.01	0.00327	-0.85	0.01	0.00236	-0.85	0.01	0.0013	-0.85	0.01	0.00181
-0.8	0.01	0.00342	-0.8	0.01	0.00327	-0.8	0.01	0.00236	-0.8	0.01	0.0013	-0.8	0.01	0.00181
-0.75	0.01	0.00342	-0.75	0.01	0.00327	-0.75	0.01	0.00236	-0.75	0.01	0.0013	-0.75	0.01	0.00181
-0.7	0.01	0.00342	-0.7	0.01	0.00327	-0.7	0.01	0.00236	-0.7	0.01	0.0013	-0.7	0.01	0.00181
-0.65	0.01	0.00342	-0.65	0.01	0.00327	-0.65	0.01	0.00236	-0.65	0.01	0.0013	-0.65	0.01	0.00181
-0.6	0.01	0.00342	-0.6	0.01	0.00327	-0.6	0.01	0.00236	-0.6	0.01	0.0013	-0.6	0.01	0.00181
-0.55	0.01	0.00342	-0.55	0.01	0.00327	-0.55	0.01	0.00236	-0.55	0.01	0.0013	-0.55	0.01	0.00181
-0.5	0.01	0.00342	-0.5	0.01	0.00327	-0.5	0.01	0.00236	-0.5	0.01	0.0013	-0.5	0.01	0.00181
-0.45	0.01	0.00342	-0.45	0.01	0.00327	-0.45	0.01	0.00236	-0.45	0.01	0.0013	-0.45	0.01	0.00181
-0.4	0.01	0.00342	-0.4	0.01	0.00327	-0.4	0.01	0.00236	-0.4	0.01	0.0013	-0.4	0.01	0.00181
-0.35	0.01	0.00342	-0.35	0.01	0.00327	-0.35	0.01	0.00236	-0.35	0.01	0.0013	-0.35	0.01	0.00181
-0.3	0.01	0.00342	-0.3	0.01	0.00327	-0.3	0.01	0.00236	-0.3	0.01	0.0013	-0.3	0.01	0.00181
-0.25	0.01	0.00342	-0.25	0.01	0.00327	-0.25	0.01	0.00236	-0.25	0.01	0.0013	-0.25	0.01	0.00181
-0.2	0.01	0.00342	-0.2	0.01	0.00327	-0.2	0.01	0.00236	-0.2	0.01	0.0013	-0.2	0.01	0.00181
-0.15	0.01	0.00342	-0.15	0.01	0.00327	-0.15	0.01	0.00236	-0.15	0.01	0.0013	-0.15	0.01	0.00181
-0.1	0.01	0.00342	-0.1	0.01	0.00327	-0.1	0.01	0.00236	-0.1	0.01	0.0013	-0.1	0.01	0.00181
-0.05	0.01	0.00342	-0.05	0.01	0.00327	-0.05	0.01	0.00236	-0.05	0.01	0.0013	-0.05	0.01	0.00181
0	0.01	0.00342	0	0.01	0.00327	0	0.01	0.00236	0	0.01	0.0013	0	0.01	0.00181
0.05	0.01	0.00342	0.05	0.01	0.00327	0.05	0.01	0.00236	0.05	0.01	0.0013	0.05	0.01	0.00181
0.1	0.01	0.00342	0.1	0.01	0.00327	0.1	0.01	0.00236	0.1	0.01	0.0013	0.1	0.01	0.00181
0.15	0.01	0.00342	0.15	0.01	0.00327	0.15	0.01	0.00236	0.15	0.01	0.0013	0.15	0.01	0.00181
0.2	0.01	0.00342	0.2	0.01	0.00327	0.2	0.01	0.00236	0.2	0.01	0.0013	0.2	0.01	0.00181
0.25	0.01	0.00342	0.25	0.01	0.00327	0.25	0.01	0.00236	0.25	0.01	0.0013	0.25	0.01	0.00181
0.3	0.01	0.00342	0.3	0.01	0.00327	0.3	0.01	0.00236	0.3	0.01	0.0013	0.3	0.01	0.00181
0.35	0.01	0.00342	0.35	0.01	0.00327	0.35	0.01	0.00236	0.35	0.01	0.0013	0.35	0.01	0.00181
0.4	0.01	0.00342	0.4	0.01	0.00327	0.4	0.01	0.00236	0.4	0.01	0.0013	0.4	0.01	0.00181
0.45	0.01	0.00342	0.45	0.01	0.00327	0.45	0.01	0.00236	0.45	0.01	0.0013	0.45	0.01	0.00181
0.5	0.01	0.00342	0.5	0.01	0.00327	0.5	0.01	0.00236	0.5	0.01	0.0013	0.5	0.01	0.00181
0.55	0.01	0.00342	0.55	0.01	0.00327	0.55	0.01	0.00236	0.55	0.01	0.0013	0.55	0.01	0.00181
0.6	0.01	0.00342	0.6	0.01	0.00327	0.6	0.01	0.00236	0.6	0.01	0.0013	0.6	0.01	0.00181
0.65	0.01	0.00342	0.65	0.01	0.00327	0.65	0.01	0.00236	0.65	0.01	0.0013	0.65	0.01	0.00181
0.7	0.01	0.00342	0.7	0.01	0.00327	0.7	0.01	0.00236	0.7	0.01	0.0013	0.7	0.01	0.00181
0.75	0.01	0.00342	0.75	0.01	0.00327	0.75	0.01	0.00236	0.75	0.01	0.0013	0.75	0.01	0.00181
0.8	0.01	0.00342	0.8	0.01	0.00327	0.8	0.01	0.00236	0.8	0.01	0.0013	0.8	0.01	0.00181
0.85	0.01	0.00342	0.85	0.01	0.00327	0.85	0.01	0.00236	0.85	0.01	0.0013	0.85	0.01	0.00181
0.9	0.01	0.00342	0.9	0.01	0.00327	0.9	0.01	0.00236	0.9	0.01	0.0013	0.9	0.01	0.00181
0.95	0.01	0.00342	0.95	0.01	0.00327	0.95	0.01	0.00236	0.95	0.01	0.0013	0.95	0.01	0.00181
1	0.01	0.00342	1	0.01	0.00327	1	0.01	0.00236	1	0.01	0.0013	1	0.01	0.00181
1.05	0.01	0.00342	1.05	0.01	0.00327	1.05	0.01	0.00236	1.05	0.01	0.0013	1.05	0.01	0.00181
1.1	0.01	0.00342	1.1	0.01	0.00327	1.1	0.01	0.00236	1.1	0.01	0.0013	1.1	0.01	0.00181
1.15	0.01	0.00342	1.15	0.01	0.00327	1.15	0.01	0.00236	1.15	0.01	0.0013	1.15	0.01	0.00181
1.2	0.01	0.00342	1.2	0.01	0.00327	1.2	0.01	0.00236	1.2	0.01	0.0013	1.2	0.01	0.00181
1.25	0.01	0.00342	1.25	0.01	0.00327	1.25	0.01	0.00236	1.25	0.01	0.0013	1.25	0.01	0.00181
1.3	0.01	0.00342	1.3	0.01	0.00327	1.3	0.01	0.00236	1.3	0.01	0.0013	1.3	0.01	0.00181
1.35	0.01	0.00342	1.35	0.01	0.00327	1.35	0.01	0.00236	1.35	0.01	0.0013	1.35	0.01	0.00181
1.4	0.01	0.00342	1.4	0.01	0.00327	1.4	0.01	0.00236	1.4	0.01	0.0013	1.4	0.01	0.00181
1.45	0.01	0.00342	1.45	0.01	0.00327	1.45	0.01	0.00236	1.45	0.01	0.0013	1.45	0.01	0.00181
1.5	0.01	0.00342	1.5	0.01	0.00327	1.5	0.01	0.00236	1.5	0.01	0.0013	1.5	0.01	0.00181
1.55	0.01	0.00342	1.55	0.01	0.00327	1.55	0.01	0.00236	1.55	0.01	0.0013	1.55	0.01	0.00181
1.6	0.01	0.00342	1.6	0.01	0.00327	1.6	0.01	0.00236	1.6	0.01	0.0013	1.6	0.01	0.00181
1.65	0.01	0.00342	1.65	0.01	0.00327	1.65	0.01	0.00236	1.65	0.01	0.0013	1.65	0.01	0.00181
1.7	0.01	0.00342	1.7	0.01	0.00327	1.7	0.01	0.00236	1.7	0.01	0.0013	1.7	0.01	0.00181
1.75	0.01	0.00342	1.75	0.01	0.00327	1.75	0.01	0.00236	1.75	0.01	0.0013	1.75	0.01	0.00181
1.8	0.01	0.00342	1.8	0.01	0.00327	1.8	0.01	0.00236	1.8	0.01	0.0013	1.8	0.01	0.00181
1.85	0.01	0.00342	1.85	0.01	0.00327	1.85	0.01	0.00236	1.85	0.01	0.0013	1.85	0.01	0.00181
1.9	0.01	0.00342	1.9	0.01	0.00327	1.9	0.01	0.00236	1.9	0.01	0.0013	1.9	0.01	0.00181
1.95	0.01	0.00342	1.95	0.01	0.00327	1.95	0.01	0.00236	1.95	0.01	0.0013	1.95	0.01	0.00181
2	0.01	0.00342	2	0.01	0.00327	2	0.01	0.00236	2	0.01	0.0013	2	0.01	0.00181
2.05	0.01	0.00342	2.05	0.01	0.00327	2.05	0.01	0.00236	2.05	0.01	0.0013	2.05	0.01	0.00181
2.1	0.01	0.00342	2.1	0.01	0.00327	2.1	0.01	0.00236	2.1	0.01	0.0013	2.1	0.01	0.00181
2.15	0.01	0.00342	2.15	0.01	0.00327	2.15	0.01	0.00236	2.15	0.01	0.0013	2.15	0.01	0.00181
2.2	0.01	0.00342	2.2	0.01	0.00327	2.2	0.01	0.00236	2.2	0.01	0.0013	2.2	0.01	0.00181
2.25	0.01	0.00342	2.25	0.01	0.00327	2.25	0.01	0.00236	2.25	0.01	0.0013	2.25	0.01	0.00181
2.3	0.01	0.00342	2.3	0.01	0.00327	2.3	0.01	0.00236	2.3	0.01	0.0013	2.3	0.01	0.00181
2.35	0.01	0.00342	2.35	0.01	0.00327	2.35	0.01	0.00236	2.35	0.01	0.0013	2.35	0.01	0.00181
2.4	0.01	0.00342	2.4	0.01	0.00327	2.4	0.01	0.00236	2.4	0.01	0.0013	2.4	0.01	0.00181
2.45	0.01	0.00342	2.45	0.01	0.00327	2.45	0.01	0.00236	2.45	0.01	0.0013	2.45	0.01	0.00181
2.5	0.01	0.00342	2.5	0.01	0.00327	2.5	0.01	0.00236	2.5	0.01	0.0013	2.5	0.01	0.00181
2.55	0.01	0.00342	2.55	0.01	0.00327	2.55	0.01	0.00236	2.55	0.01	0.0013	2.55	0.01	0.00181
2.6	0.01	0.00342	2.6	0.01	0.00327	2.6	0.01	0.00236	2.6	0.01	0.0013	2.6	0.01	0.00181
2.65	0.01	0.00342	2.65	0.01	0.00327	2.65	0.01	0.00236	2.65	0.01	0.0013	2.65	0.01	0.00181
2.7	0.01	0.00342	2.7	0.01	0.00327	2.7	0.01	0.00236	2.7	0.01	0.0013	2.7	0.01	0.00181
2.75	0.01	0.00342	2.75	0.01	0.00327	2.75	0.01	0.00236	2.75	0.01	0.0013	2.75	0.01	0.00181
2.8	0.01	0.00342	2.8	0.01	0.00327	2.8	0.01	0.00236	2.8	0.01	0.0013	2.8	0.01	0.00181
2.85	0.01	0.00342	2.85	0.01	0.00327	2.85	0.01	0.00236	2.85	0.01	0.0013	2.85	0.01	0.00181
2.9	0.01	0.00342	2.9	0.01	0.00327	2.9	0.01	0.00236	2.9	0.01	0.0013	2.9	0.01	0.00181
2.95	0.01	0.00342	2.95	0.01	0.00327	2.95	0.01	0.00236	2.95	0.01	0.0013	2.95	0.01	0.00181
3	0.01	0.00342	3	0.01	0.00327	3	0.01	0.00236	3	0.01	0.0013	3	0.01	0.00181
3.05	0.01	0.00342	3.05	0.01	0.00327	3.05	0.01	0.00236	3.05	0.01	0.0013	3.05	0.01	0.00181
3.1	0.01	0.00342	3.1	0.01	0.00327	3.1	0.01	0.00236	3.1	0.01	0.0013	3.1	0.01	0.00181
3.15	0.01	0.00342	3.15	0.01	0.00327	3.15	0.01	0.00236	3.15	0.01	0.0013	3.15	0.01	0.00181
3.2	0.01	0.00342	3.2	0.01	0.00327	3.2	0.01	0.00236	3.2	0.01	0.0013	3.2	0.01	0.00181
3.25	0.01	0.00342	3.25	0.01	0.00327	3.25	0.01	0.00236	3.25	0.01	0.0013	3.25	0.01	0.00181
3.3	0.01	0.00342	3.3	0.01	0.00327	3.3	0.01	0.00236	3.3	0.01	0.0013	3.3	0.01	0.00181
3.35	0.01	0.00342	3.35	0.01	0.00327	3.35	0.01	0.00236	3.35	0.01	0.0013	3.35	0.01	0.00181
3.4	0.01	0.00342	3.4	0.01	0.00327	3.4	0.01	0.00236	3.4	0.01	0.0013	3.4	0.01	0.00181
3.45	0.01	0.00342	3.45	0.01	0.00327	3.45	0.01	0.00236	3.45	0.01	0.0013	3.45	0.01	0.00181
3.5	0.01	0.00342	3.5	0.01	0.00327	3.5	0.01	0.00236	3.5	0.01	0.0013	3.5	0.01	0.00181
3.55	0.01	0.00342	3.55	0.01	0.00327	3.55	0.01	0.00236	3.55	0.01	0.0013	3.55	0.01	0.00181
3.6	0.01	0.00342	3.6	0.01	0.00327	3.6	0.01	0.00236	3.6	0.01	0.0013	3.6	0.01	0.00181
3.65	0.01	0.00342	3.65	0.01	0.00327	3.65	0.01	0.00236	3.65	0.01	0.0013	3.65	0.01	0.00181
3.7	0.01	0.00342	3.7	0.01	0.00327	3.7	0.01	0.00236	3.7	0.01	0.0013	3.7	0.01	0.00181
3.75	0.01	0.00342	3.75	0.01	0.00327	3.75	0.01	0.00236	3.75	0.01	0.0013	3.75	0.01	0.00181
3.8	0.01	0.00342	3.8	0.01	0.00327	3.8	0.01	0.00236	3.8	0.01	0.0013	3.8	0.01	0.00181
3.85	0.01	0.00342	3.85	0.01	0.00327	3.85	0.01	0.00236	3.85	0.01	0.0013	3.85	0.01	0.00181
3.9	0.01	0.00342	3.9	0.01	0.00327	3.9	0.01	0.00236	3.9	0.01	0.0013	3.9	0.01	0.00181
3.95	0.01	0.00342	3.95	0.01	0.00327	3.95	0.01	0.00236	3.95	0.01	0.0013	3.95	0.01	0.00181
4	0.01	0.00342	4	0.01	0.00327	4	0.01	0.00236	4	0.01	0.0013	4	0.01	0.00181
4.05	0.01	0.00342	4.05	0.01	0.00327	4.05	0.01	0.00236	4.05	0.01	0.0013	4.05	0.01	0.00181
4.1	0.01	0.00342	4.1	0.01	0.00327	4.1	0.01	0.00236	4.1	0.01	0.0013	4.1	0.01	0.00181
4.15	0.01	0.00342	4.15	0.01	0.00327	4.15	0.01	0.00236	4.15	0.01	0.0013	4.15	0.01	0.00181
4.2	0.01	0.00342	4.2	0.01	0.00327	4.2	0.01	0.00236	4.2	0.01	0.0013	4.2	0.01	0.00181
4.25	0.01	0.00342	4.25	0.01	0.00327	4.25	0.01	0.00236	4.25	0.01	0.0013	4.25	0.01	0.00181
4.3	0.01	0.00342	4.3	0.01	0.00327	4.3	0.01	0.00236	4.3	0.01	0.0013	4.3	0.01	0.00181
4.35	0.01	0.00342	4.35	0.01	0.00327	4.35	0.01	0.00236	4.35	0.01	0.0013	4.35	0.01	0.00181
4.4	0.01	0.00342	4.4	0.01	0.00327	4.4	0.01	0.00236	4.4	0.01	0.0013	4.4	0.01	0.00181
4.45	0.01	0.00342	4.45	0.01	0.00327	4.45	0.01	0.00236	4.45	0.01	0.0013	4.45	0.01	0.00181
4.5	0.01	0.00342	4.5	0.01	0.00327	4.5	0.01	0.00236	4.5	0.01	0.0013	4.5	0.01	0.00181
4.55	0.01	0.00342	4.55	0.01	0.00327	4.55	0.01	0.00236	4.55	0.01	0.0013	4.55	0.01	0.00181
4.6	0.01	0.00342	4.6	0.01	0.00327	4.6	0.01	0.00236	4.6	0.01	0.0013	4.6	0.01	0.00181
4.65	0.01	0.00342	4.65	0.01	0.00327	4.65	0.01	0.00236	4.65	0.01	0.0013	4.65	0.01	0.00181
4.7	0.01	0.00342	4.7	0.01	0.00327	4.7	0.01	0.00236	4.7	0.01	0.0013	4.7	0.01	0.00181
4.75	0.01	0.00342	4.75	0.01	0.00327	4.75	0.01	0.00236	4.75	0.01	0.0013	4.75	0.01	0.00181
4.8	0.01	0.00342	4.8	0.01	0.00327	4.8	0.01	0.00236	4.8	0.01	0.0013	4.8	0.01	0.00181
4.85	0.01	0.00342	4.85	0.01	0.00327	4.85	0.01	0.00236	4.85	0.01	0.0013	4.85	0.01	0.00181
4.9	0.01	0.00342	4.9	0.01	0.00327	4.9	0.01	0.00236	4.9	0.01	0.0013	4.9	0.01	0.00181
4.95	0.01	0.00342	4.95	0.01	0.00327	4.95	0.01	0.00236	4.95	0.01	0.0013	4.95	0.01	0.00181
5	0.01	0.00342	5	0.01	0.00327	5	0.01	0.00236	5	0.01	0.0013	5	0.01	0.00181
5.05	0.01	0.00342	5.05	0.01	0.00327	5.05	0.01	0.00236	5.05	0.01	0.0013	5.05	0.01	0.00181
5.1	0.01	0.00342	5.1	0.01	0.00327	5.1	0.01	0.00236	5.1	0.01	0.0013	5.1	0.01	0.00181
5.15	0.01	0.00342	5.15	0.01	0.00327	5.15	0.01	0.00236	5.15	0.01	0.0013	5.15	0.01	0.00181
5.2	0.01	0.00342	5.2	0.01	0.00327	5.2	0.01	0.00236	5.2	0.01	0.0013	5.2	0.01	0.00181
5.25	0.01	0.00342	5.25	0.01	0.00327	5.25	0.01	0.00236	5.25	0.01	0.0013	5.25	0.01	0.00181
5.3	0.01	0.00342	5.3	0.01	0.00327	5.3	0.01	0.00236	5.3	0.01	0.0013	5.3	0.01	0.00181
5.35	0.01	0.00342	5.35	0.01	0.00327	5.35	0.01	0.00236	5.35	0.01	0.0013	5.35	0.01	0.00181
5.4	0.01	0.00342	5.4	0.01	0.00327	5.4	0.01	0.00236	5.4	0.01	0.0013	5.4	0.01	0.00181
5.45	0.01	0.00342	5.45	0.01	0.00327	5.45	0.01	0.00236	5.45	0.01	0.0013	5.45	0.01	0.00181
5.5	0.01	0.00342	5.5	0.01	0.00327	5.5	0.01	0.00236	5.5	0.01	0.0013	5.5	0.01	0.00181
5.55	0.01	0.00342	5.55	0.01	0.00327	5.55	0.01	0.00236	5.55	0.01	0.0013	5.55	0.01	0.00181
5.6	0.01	0.00342	5.6	0.01	0.00327	5.6	0.01	0.00236	5.6	0.01	0.0013	5.6	0.01	0.00181
5.65	0.01	0.00342	5.65	0.01	0.00327	5.65	0.01	0.00236	5.65	0.01	0.0013	5.65	0.01	0.00181
5.7	0.01	0.00342	5.7	0.01	0.00327	5.7	0.01	0.00236	5.7	0.01	0.0013	5.7	0.01	0.00181
5.75	0.01	0.00342	5.75	0.01	0.00327	5.75	0.01	0.00236	5.75	0.01	0.0013	5.75	0.01	0.00181
5.8	0.01	0.00342	5.8	0.01	0.00327	5.8	0.01	0.00236	5.8	0.01	0.0013	5.8	0.01	0.00181
5.85	0.01	0.00342	5.85	0.01	0.00327	5.85	0.01	0.00236	5.85	0.01	0.0013	5.85	0.01	0.00181
5.9	0.01	0.00342	5.9	0.01	0.00327	5.9	0.01	0.00236	5.9	0.01	0.0013	5.9	0.01	0.00181
5.95	0.01	0.00342	5.95	0.01	0.00327	5.95	0.01	0.00236	5.95	0.01	0.0013	5.95	0.01	0.00181
6	0.01	0.00342	6	0.01	0.00327	6	0.01	0.00236	6	0.01	0.0013	6	0.01	0.00181
6.05	0.01	0.00342	6.05	0.01	0.00327	6.05	0.01	0.00236	6.05	0.01	0.0013	6.05	0.01	0.00181
6.1	0.01	0.00342	6.1	0.01	0.00327	6.1	0.01	0.00236	6.1	0.01	0.0013	6.1	0.01	0.00181
6.15	0.01	0.00342	6.15	0.01	0.00327	6.15	0.01	0.00236	6.15	0.01	0.0013	6.15	0.01	0.00181
6.2	0.01	0.00342	6.2	0.01	0.00327	6.2	0.01	0.00236	6.2	0.01	0.0013	6.2	0.01	0.00181
6.25	0.01	0.00342	6.25	0.01	0.00327	6.25	0.01	0.00236	6.25	0.01	0.0013	6.25	0.01	0.00181
6.3	0.01	0.00342	6.3	0.01	0.00327	6.3	0.01	0.00236	6.3	0.01	0.0013	6.3	0.01	0.00181
6.35	0.01	0.00342	6.35	0.01	0.00327	6.35	0.01	0.00236	6.35	0.01	0.0013	6.35	0.01	0.00181
6.4	0.01	0.00342	6.4	0.01	0.00327	6.4	0.01	0.00236	6.4	0.01	0.0013	6.4	0.01	0.00181
6.45	0.01	0.00342	6.45	0.01	0.00327	6.45	0.01	0.00236	6.45	0.01	0.0013	6.45	0.01	0.00181
6.5	0.01	0.00342	6.5	0.01	0.00327	6.5	0.01	0.00236	6.5	0.01	0.0013	6.5	0.01	0.00181
6.55	0.01	0.00342	6.55	0.01	0.00327	6.55	0.01	0.00236	6.55	0.01	0.0013	6.55	0.01	0.00181
6.6	0.01	0.00342	6.6	0.01	0.00327	6.6	0.01	0.00236	6.6	0.01	0.0013	6.6	0.01	0.00181
6.65	0.01	0.00342	6.65	0.01	0.00327	6.65	0.01	0.00236	6.65	0.01	0.0013	6.65	0.01	0.00181
6.7	0.01	0.00342	6.7	0.01	0.00327	6.7	0.01	0.00236	6.7	0.01	0.0013	6.7	0.01	0.00181
6.75	0.01	0.00342	6.75	0.01	0.00327	6.75	0.01	0.00236	6.75	0.01	0.0013	6.75	0.01	0.00181
6.8	0.01	0.00342	6.8	0.01	0.00327	6.8	0.01	0.00236	6.8	0.01	0.0013	6.8	0.01	0.00181
6.85	0.01	0.00342	6.85	0.01	0.00327	6.85	0.01	0.00236	6.85	0.01	0.0013	6.85	0.01	0.00181
6.9	0.01	0.00342	6.9	0.01	0.00327	6.9	0.01	0.00236	6.9	0.01	0.0013	6.9	0.01	0.00181
6.95	0.01	0.00342	6.95	0.01	0.00327	6.95	0.01	0.00236	6.95	0.01	0.0013	6.95	0.01	0.00181
7	0.01	0.00342	7	0.01	0.00327	7	0.01	0.00236	7	0.01	0.0013	7	0.01	0.00181
7.05	0.01	0.00342	7.05	0.01	0.00327	7.05	0.01	0.00236	7.05	0.01	0.0013	7.05	0.01	0.00181
7.1	0.01	0.00342	7.1	0.01	0.00327	7.1	0.01	0.00236	7.1	0.01	0.0013	7.1	0.01	0.00181
7.15	0.01	0.00342	7.15	0.01	0.00327	7.15	0.01	0.00236	7.15	0.01	0.0013	7.15	0.01	0.00181
7.2	0.01	0.00342	7.2	0.01	0.00327	7.2	0.01	0.00236	7.2	0.01	0.0013	7.2	0.01	0.00181
7.25	0.01	0.00342	7.25	0.01	0.00327	7.25	0.01	0.00236	7.25	0.01	0.0013	7.25	0.01	0.00181
7.3	0.01	0.00342	7.3	0.01	0.00327	7.3	0.01	0.00236	7.3	0.01	0.0013	7.3	0.01	0.00181
7.35	0.01	0.00342	7.35	0.01	0.00327	7.35	0.01	0.00236	7.35	0.01	0.0013	7.35	0.01	0.00181
7.4	0.01	0.00342	7.4	0.01	0.00327	7.4	0.01	0.00236	7.4	0.01	0.0013	7.4	0.01	0.00181
7.45	0.01	0.00342	7.45	0.01	0.00327	7.45	0.01	0.00236	7.45	0.01	0.0013	7.45	0.01	0.00181
7.5	0.01	0.00342	7.5	0.01	0.00327	7.5	0.01	0.00236	7.5	0.01	0.0013	7.5	0.01	0.00181
7.55	0.01	0.00342	7.55	0.01	0.00327	7.55	0.01	0.00236	7.55	0.01	0.0013	7.55	0.01	0.00181
7.6	0.01	0.00342	7.6	0.01	0.00327	7.6	0.01	0.00236	7.6	0.01	0.0013	7.6	0.01	0.00181
7.65	0.01	0.00342	7.65	0.01	0.00327	7.65	0.01	0.00236	7.65	0.01	0.0013	7.65	0.01	0.00181
7.7	0.01	0.00342	7.7	0.01	0.00327	7.7	0.01	0.00236	7.7	0.01	0.0013	7.7	0.01	0.00181
7.75	0.01	0.00342	7.75	0.01	0.00327	7.75	0.01	0.00236	7.75	0.01	0.0013	7.75	0.01	0.00181
7.8	0.01	0.00342	7.8	0.01	0.00327	7.8	0.01	0.00236	7.8	0.01	0.0013	7.8	0.01	0.00181
7.85	0.01	0.00342	7.85	0.01	0.00327	7.85	0.01	0.00236	7.85	0.01	0.0013	7.85	0.01	0.00181
7.9	0.01	0.00342	7.9	0.01	0.00327	7.9	0.01	0.00236	7.9	0.01	0.0013	7.9	0.01	0.00181
7.95	0.01	0.00342	7.95	0.01	0.00327	7.95	0.01	0.00236	7.95	0.01	0.0013	7.95	0.01	0.00181
8	0.01	0.00342	8	0.01	0.00327	8	0.01	0.00236	8	0.01	0.0013	8	0.01	0.00181
8.05	0.01	0.00342	8.05	0.01	0.00327	8.05	0.01	0.00236	8.05	0.01	0.0013	8.05	0.01	0.00181
8.1	0.01	0.00342	8.1	0.01	0.00327	8.1	0.01	0.00236	8.1	0.01	0.0013	8.1	0.01	0.00181
8.15	0.01	0.00342	8.15	0.01	0.00327	8.15	0.01	0.00236	8.15	0.01	0.0013	8.15	0.01	0.00181
8.2	0.01	0.00342	8.2	0.01	0.00327	8.2	0.01	0.00236	8.2	0.01	0.0013	8.2	0.01	0.00181
8.25	0.01	0.00342	8.25	0.01	0.00327	8.25	0.01	0.00236	8.25	0.01	0.0013	8.25	0.01	0.00181
8.3	0.01	0.00342	8.3	0.01	0.00327	8.3	0.01	0.00236	8.3	0.01	0.0013	8.3	0.01	0.00181
8.35	0.01	0.00342	8.35	0.01	0.00327	8.35	0.01	0.00236	8.35	0.01	0.0013	8.35	0.01	0.00181
8.4	0.01	0.00342	8.4	0.01	0.00327	8.4	0.01	0.00236	8.4	0.01	0.0013	8.4	0.01	0.00181
8.45	0.01	0.00342	8.45	0.01	0.00327	8.45	0.01	0.00236	8.45	0.01	0.0013	8.45	0.01	0.00181
8.5	0.01	0.00342	8.5	0.01	0.00327	8.5	0.01	0.00236	8.5	0.01	0.0013	8.5	0.01	0.00181
8.55	0.01	0.00342	8.55	0.01	0.00327	8.55	0.01	0.00236	8.55	0.01	0.0013	8.55	0.01	0.00181
8.6	0.01	0.00342	8.6	0.01	0.00327	8.6	0.01	0.00236	8.6	0.01	0.0013	8.6	0.01	0.00181
8.65	0.01	0.00342	8.65	0.01	0.00327	8.65	0.01	0.00236	8.65	0.01	0.0013	8.65	0.01	0.00181
8.7	0.01	0.00342	8.7	0.01	0.00327	8.7	0.01	0.00236	8.7	0.01	0.0013	8.7	0.01	0.00181
8.75	0.01	0.00342	8.75	0.01	0.00327	8.75	0.01	0.00236	8.75	0.01	0.0013	8.75	0.01	0.00181
8.8	0.01	0.00342	8.8	0.01	0.00327	8.8	0.01	0.00236	8.8	0.01	0.0013	8.8	0.01	0.00181
8.85	0.01	0.00342	8.85	0.01	0.00327	8.85	0.01	0.00236	8.85	0.01	0.0013	8.85	0.01	0.00181
8.9	0.01	0.00342	8.9	0.01	0.00327	8.9	0.01	0.00236	8.9	0.01	0.0013	8.9	0.01	0.00181
8.95	0.01	0.00342	8.95	0.01	0.00327	8.95	0.01	0.00236	8.95	0.01	0.0013	8.95	0.01	0.00181
9	0.01	0.00342	9	0.01	0.00327	9	0.01	0.00236	9	0.01	0.0013	9	0.01	0.00181
9.05	0.01	0.00342	9.05	0.01	0.00327	9.05	0.01	0.00236	9.05	0.01	0.0013	9.05	0.01	0.00181
9.1	0.01	0.00342	9.1	0.01	0.00327	9.1	0.01	0.00236	9.1	0.01	0.0013	9.1	0.01	0.00181
9.15	0.01	0.00342	9.15	0.01	0.00327	9.15	0.01	0.00236	9.15	0.01	0.0013	9.15	0.01	0.00181
9.2	0.01	0.00342	9.2	0.01	0.00327	9.2	0.01	0.00236	9.2	0.01	0.0013	9.2	0.01	0.00181
9.25	0.01	0.00342	9.25	0.01	0.00327	9.25	0.01	0.00236	9.25	0.01	0.0013	9.25	0.01	0.00181
9.3	0.01	0.00342	9.3	0.01	0.00327	9.3	0.01	0.00236	9.3	0.01	0.0013	9.3	0.01	0.00181
9.35	0.01	0.00342	9.35	0.01	0.00327	9.35	0.01	0.00236	9.35	0.01	0.0013	9.35	0.01	0.00181
9.4	0.01	0.00342	9.4	0.01	0.00327	9.4	0.01	0.00236	9.4	0.01	0.0013	9.4	0.01	0.00181
9.45	0.01	0.00342	9.45	0.01	0.00327	9.45	0.01	0.00236	9.45	0.01	0.0013	9.45	0.01	0.00181
9.5	0.01	0.00342	9.5	0.01	0.00327	9.5	0.01	0.00236	9.5	0.01	0.0013	9.5	0.01	0.00181
9.55	0.01	0.00342	9.55	0.01	0.00327	9.55	0.01	0.00236	9.55	0.01	0.0013	9.55	0.01	0.00181
9.6	0.01	0.00342	9.6	0.01	0.00327	9.6	0.01	0.00236	9.6	0.01	0.0013	9.6	0.01	0.00181
9.65	0.01	0.00342	9.65	0.01	0.00327	9.65	0.01	0.00236	9.65	0.01	0.0013	9.65	0.01	0.00181
9.7	0.01	0.00342	9.7	0.01	0.00327	9.7	0.01	0.00236	9.7	0.01	0.0013	9.7	0.01	0.00181
9.75	0.01	0.00342	9.75	0.01	0.00327	9.75	0.01	0.00236	9.75	0.01	0.0013	9.75	0.01	0.00181
9.8	0.01	0.00342	9.8	0.01	0.00327	9.8	0.01	0.00236	9.8	0.01	0.0013	9.8	0.01	0.00181
9.85	0.01	0.00342	9.85	0.01	0.00327	9.85	0.01	0.00236	9.85	0.01	0.0013	9.85	0.01	0.00181
9.9	0.01	0.00342	9.9	0.01	0.00327	9.9	0.01	0.00236	9.9	0.01	0.0013	9.9	0.01	0.00181
9.95	0.01	0.00342	9.95	0.01	0.00327	9.95	0.01	0.00236	9.95	0.01	0.0013	9.95	0.01	0.00181
10	0.01	0.00342	10	0.01	0.00327	10	0.01	0.00236	10	0.01	0.0013	10	0.01	0.00181
10.05	0.01	0.00342	10.05	0.01	0.00327	10.05	0.01	0.00236	10.05	0.01	0.0013	10.05	0.01	0.00181
10.1	0.01	0.00342	10.1	0.01	0.00327	10.1	0.01	0.00236	10.1	0.01	0.0013	10.1	0.01	0.00181
10.15	0.01	0.00342	10.15	0.01	0.00327	10.15	0.01	0.00236	10.15	0.01	0.0013	10.15	0.01	0.00181
10.2	0.01	0.00342	10.2	0.01	0.00327	10.2	0.01	0.00236	10.2	0.01	0.0013	10.2	0.01	0.00181
10.25	0.01	0.00342	10.25	0.01	0.00327	10.25	0.01	0.00236	10.25	0.01	0.0013	10.25	0.01	0.00181
10.3	0.01	0.00342	10.3	0.01	0.00327	10.3	0.01	0.00236	10.3	0.01	0.0013	10.3	0.01	0.00181
10.35	0.01	0.00342	10.35	0.01	0.00327	10.35	0.01	0.00236	10.35	0.01	0.0013	10.35	0.01	0.00181
10.4	0.01	0.00342	10.4	0.01	0.00327	10.4	0.01	0.00236	10.4	0.01	0.0013	10.4	0.01	0.00181
10.45	0.01	0.00342	10.45	0.01	0.00327	10.45	0.01	0.00236	10.45	0.01	0.0013	10.45	0.01	0.00181
10.5	0.01	0.00342	10.5	0.01	0.00327	10.5	0.01	0.00236	10.5	0.01	0.0013	10.5	0.01	0.00181
10.55	0.01	0.00342	10.55	0.01	0.00327	10.55	0.01	0.00236	10.55	0.01	0.0013	10.55	0.01	0.00181
10.6	0.01	0.00342	10.6	0.01	0.00327	10.6	0.01	0.00236	10.6	0.01	0.0013	10.6	0.01	0.00181
10.65	0.01	0.00342	10.65	0.01	0.00327	10.65	0.01	0.00236	10.65	0.01	0.0013	10.65	0.01	0.00181
10.7	0.01	0.00342	10.7	0.01	0.00327	10.7	0.01	0.00236	10.7	0.01	0.0013	10.7	0.01	0.00181
10.75	0.01	0.00342	10.75	0.01	0.00327	10.75	0.01	0.00236	10.75	0.01	0.0013	10.75	0.01	0.00181
10.8	0.01	0.00342	10.8	0.01	0.00327	10.8	0.01	0.00236	10.8	0.01	0.0013	10.8	0.01	0.00181
10.85	0.01	0.00342	10.85	0.01	0.00327	10.85	0.01	0.00236	10.85	0.01	0.0013	10.85	0.01	0.00181
10.9	0.01	0.00342	10.9	0.01	0.00327	10.9	0.01	0.00236	10.9	0.01	0.0013	10.9	0.01	0.00181
10.95	0.01	0.00342	10.95	0.01	0.00327	10.95	0.01	0.00236	10.95	0.01	0.0013	10.95	0.01	0.00181
11	0.01	0.00342	11	0.01	0.00327	11	0.01	0.00236	11	0.01	0.0013	11	0.01	0.00181
11.05	0.01	0.00342	11.05	0.01	0.00327	11.05	0.01	0.00236	11.05	0.01	0.0013	11.05	0.01	0.00181
11.1	0.01	0.00342	11.1	0.01	0.00327	11.1	0.01	0.00236	11.1	0.01	0.0013	11.1	0.01	0.00181
11.15	0.01	0.00342	11.15	0.01	0.00327	11.15	0.01	0.00236	11.15	0.01	0.0013	11.15	0.01	0.00181
11.2	0.01	0.00342	11.2	0.01	0.00327	11.2	0.01	0.00236	11.2	0.01	0.0013	11.2	0.01	0.00181
11.25	0.01	0.00342	11.25	0.01	0.00327	11.25	0.01	0.00236	11.25	0.01	0.0013	11.25	0.01	0.00181
11.3	0.01	0.00342	11.3	0.01	0.00327	11.3	0.01	0.00236	11.3	0.01	0.0013	11.3	0.01	0.00181
11.35	0.01	0.00342	11.35	0.01	0.00327	11.35	0.01	0.00236	11.35	0.01	0.0013	11.35	0.01	0.00181
11.4	0.01	0.00342	11.4	0.01	0.00327	11.4	0.01	0.00236	11.4	0.01	0.0013	11.4	0.01	0.00181
11.45	0.01	0.00342	11.45	0.01	0.00327	11.45	0.01	0.00236	11.45	0.01	0.0013	11.45	0.01	0.00181
11.5	0.01	0.00342	11.5	0.01	0.00327	11.5	0.01	0.00236	11.5	0.01	0.0013	11.5	0.01	0.00181
11.55	0.01	0.00342	11.55	0.01	0.00327	11.55	0.01	0.00236	11.55	0.01	0.0013	11.55	0.01	0.00181
11.6	0.01	0.00342	11.6	0.01	0.00327	11.6	0.01	0.00236	11.6	0.01	0.0013	11.6	0.01	0.00181
11.65	0.01	0.00342	11.65	0.01	0.00327	11.65	0.01	0.00236	11.65	0.01	0.0013	11.65	0.01	0.00181
11.7	0.01	0.00342	11.7	0.01	0.00327	11.7	0.01	0.00236	11.7	0.01	0.0013	11.7	0.01	0.00181
11.75	0.01	0.00342	11.75	0.01	0.00327	11.75	0.01	0.00236	11.75	0.01	0.0013	11.75	0.01	0.00181
11.8	0.01	0.00342	11.8	0.01	0.00327	11.8	0.01	0.00236	11.8	0.01	0.0013	11.8	0.01	0.00181
11.85	0.01	0.00342	11.85	0.01	0.00327	11.85	0.01	0.00236	11.85	0.01	0.0013	11.85	0.01	0.00181
11.9	0.01	0.00342	11.9	0.01	0.00327	11.9	0.01	0.00236	11.9	0.01	0.0013	11.9	0.01	0.00181
11.95	0.01	0.00342	11.95	0.01	0.00327	11.95	0.01	0.00236	11.95	0.01	0.0013	11.95	0.01	0.00181
12	0.01	0.00342	12	0.01	0.00327	12	0.01	0.00236	12	0.01	0.0013	12	0.01	0.00181
12.05	0.01	0.00342	12.05	0.01	0.00327	12.05	0.01	0.00236	12.05	0.01	0.0013	12.05	0.01	0.00181
12.1	0.01	0.00342	12.1	0.01	0.00327	12.1	0.01	0.00236	12.1	0.01	0.0013	12.1	0.01	0.00181
12.15	0.01	0.00342	12.15	0.01	0.00327	12.15	0.01	0.00236	12.15	0.01	0.0013	12.15	0.01	0.00181
12.2	0.01	0.00342	12.2	0.01	0.00327	12.2	0.01	0.00236	12.2	0.01	0.0013	12.2	0.01	0.00181
12.25	0.01	0.00342	12.25	0.01	0.00327	12.25	0.01	0.00236	12.25	0.01	0.0013	12.25	0.01	0.00181
12.3	0.01	0.00342	12.3	0.01	0.00327	12.3	0.01	0.00236	12.3	0.01	0.0013	12.3	0.01	0.00181
12.35	0.01	0.00342	12.35	0.01	0.00327	12.35	0.01	0.00236	12.35	0.01	0.0013	12.35	0.01	0.00181
12.4	0.01	0.00342	12.4	0.01	0.00327	12.4	0.01	0.00236	12.4	0.01	0.0013	12.4	0.01	0.00181
12.45	0.01	0.00342	12.45	0.01	0.00327	12.45	0.01	0.00236	12.45	0.01	0.0013	12.45	0.01	0.00181
12.5	0.01	0.00342	12.5	0.01	0.00327	12.5	0.01	0.00236	12.5	0.01	0.0013	12.5	0.01	0.00181
12.55	0.01	0.00342	12.55	0.01	0.00327	12.55	0.01	0.00236	12.55	0.01	0.0013	12.55	0.01	0.00181
12.6	0.01	0.00342	12.6	0.01	0.00327	12.6	0.01	0.00236	12.6	0.01	0.0013	12.6	0.01	0.00181
12.65	0.01	0.00342	12.65	0.01	0.00327	12.65	0.01	0.00236	12.65	0.01	0.0013	12.65	0.01	0.00181
12.7	0.01	0.00342	12.7	0.01	0.00327	12.7	0.01	0.00236	12.7	0.01	0.0013	12.7	0.01	0.00181
12.75	0.01	0.00342	12.75	0.01	0.00327	12.75	0.01	0.00236	12.75	0.01	0.0013	12.75	0.01	0.00181
12.8	0.01	0.00342	12.8	0.01	0.00327	12.8	0.01	0.00236	12.8	0.01	0.0013	12.8	0.01	0.00181
12.85	0.01	0.00342	12.85	0.01	0.00327	12.85	0.01	0.00236	12.85	0.01	0.0013	12.85	0.01	0.00181
12.9	0.01	0.00342	12.9	0.01	0.00327	12.9	0.01	0.00236	12.9	0.01	0.0013	12.9	0.01	0.00181
12.95	0.01	0.00342	12.95	0.01	0.00327	12.95	0.01	0.00236	12.95	0.01	0.0013	12.95	0.01	0.00181
13	0.01	0.00342	13	0.01	0.00327	13	0.01	0.00236	13	0.01	0.0013	13	0.01	0.00181
13.05	0.01	0.00342	13.05	0.01	0.00327	13.05	0.01	0.00236	13.05	0.01	0.0013	13.05	0.01	0.00181
13.1	0.01	0.00342	13.1	0.01	0.00327	13.1	0.01	0.00236	13.1	0.01	0.0013	13.1	0.01	0.00181
13.15	0.01	0.00342	13.15	0.01	0.00327	13.15	0.01	0.00236	13.15	0.01	0.0013	13.15	0.01	0.00181
13.2	0.01	0.00342	13.2	0.01	0.00327	13.2	0.01	0.00236	13.2	0.01	0.0013	13.2	0.01	0.00181
13.25	0.01	0.00342	13.25	0.01	0.00327	13.25	0.01	0.00236	13.25	0.01	0.0013	13.25	0.01	0.00181
13.3	0.01	0.00342	13.3	0.01	0.00327	13.3	0.01	0.00236	13.3	0.01	0.0013	13.3	0.01	0.00181
13.35	0.01	0.00342	13.35	0.01	0.00327	13.35	0.01	0.00236	13.35	0.01	0.0013	13.35	0.01	0.00181
13.4	0.01	0.00342	13.4	0.01	0.00327	13.4	0.01	0.00236	13.4	0.01	0.0013	13.4	0.01	0.00181
13.45	0.01	0.00342	13.45	0.01	0.00327	13.45	0.01	0.00236	13.45	0.01	0.0013	13.45	0.01	0.00181
13.5	0.01	0.00342	13.5	0.01	0.00327	13.5	0.01	0.00236	13.5	0.01	0.0013	13.5	0.01	0.00181
13.55	0.01	0.00342	13.55	0.01	0.00327	13.55	0.01	0.00236	13.55	0.01	0.0013	13.55	0.01	0.00181
13.6	0.01	0.00342	13.6	0.01	0.00327	13.6	0.01	0.00236	13.6	0.01	0.0013	13.6	0.01	0.00181
13.65	0.01	0.00342	13.65	0.01	0.00327	13.65	0.01	0.00236	13.65	0.01	0.0013	13.65	0.01	0.00181
13.7	0.01	0.00342	13.7	0.01	0.00327	13.7	0.01	0.00236	13.7	0.01	0.0013	13.7	0.01	0.00181
13.75	0.01	0.00342	13.75	0.01	0.00327	13.75	0.01	0.00236	13.75	0.01	0.0013	13.75	0.01	0.00181
13.8	0.01	0.00342	13.8	0.01	0.00327	13.8	0.01	0.00236	13.8	0.01	0.0013	13.8	0.01	0.00181
13.85	0.01	0.00342	13.85	0.01	0.00327	13.85	0.01	0.00236	13.85	0.01	0.0013	13.85	0.01	0.00181
13.9	0.01	0.00342	13.9	0.01	0.00327	13.9	0.01	0.00236	13.9	0.01	0.0013	13.9	0.01	0.00181
13.95	0.01	0.00342	13.95	0.01	0.00327	13.95	0.01	0.00236	13.95	0.01	0.0013	13.95	0.01	0.00181
14	0.01	0.00342	14	0.01	0.00327	14	0.01	0.00236	14	0.01	0.0013	14	0.01	0.00181
14.05	0.01	0.00342	14.05	0.01	0.00327	14.05	0.01	0.00236	14.05	0.01	0.0013	14.05	0.01	0.00181
14.1	0.01	0.00342	14.1	0.01	0.00327	14.1	0.01	0.00236	14.1	0.01	0.0013	14.1	0.01	0.00181
14.15	0.01	0.00342	14.15	0.01	0.00327	14.15	0.01	0.00236	14.15	0.01	0.0013	14.15	0.01	0.00181
14.2	0.01	0.00342	14.2	0.01	0.00327	14.2	0.01	0.00236	14.2	0.01	0.0013	14.2	0.01	0.00181
14.25	0.01	0.00342	14.25	0.01	0.00327	14.25	0.01	0.00236	14.25	0.01	0.0013	14.25	0.01	0.00181
14.3	0.01	0.00342	14.3	0.01	0.00327	14.3	0.01	0.00236	14.3	0.01	0.0013	14.3	0.01	0.00181
14.35	0.01	0.00342	14.35	0.01	0.00327	14.35	0.01	0.00236	14.35	0.01	0.0013	14.35	0.01	0.00181
14.4	0.01	0.00342	14.4	0.01	0.00327	14.4	0.01	0.00236	14.4	0.01	0.0013	14.4	0.01	0.00181
14.45	0.01	0.00342	14.45	0.01	0.00327	14.45	0.01	0.00236	14.45	0.01	0.0013	14.45	0.01	0.00181
14.5	0.01	0.00342	14.5	0.01	0.00327	14.5	0.01	0.00236	14.5	0.01	0.0013	14.5	0.01	0.00181
14.55	0.01	0.00342	14.55	0.01	0.00327	14.55	0.01	0.00236	14.55	0.01	0.0013	14.55	0.01	0.00181
14.6	0.01	0.00342	14.6	0.01	0.00327	14.6	0.01	0.00236	14.6	0.01	0.0013	14.6	0.01	0.00181
14.65	0.01	0.00342	14.65	0.01	0.00327	14.65	0.01	0.00236	14.65	0.01	0.0013	14.65	0.01	0.00181
14.7	0.01	0.00342	14.7	0.01	0.00327	14.7	0.01	0.00236	14.7	0.01	0.0013	14.7	0.01	0.00181
14.75	0.01	0.00342	14.75	0.01	0.00327	14.75	0.01	0.00236	14.75	0.01	0.0013	14.75	0.01	0.00181
14.8	0.01	0.00342	14.8	0.01	0.00327	14.8	0.01	0.00236	14.8	0.01	0.0013	14.8	0.01	0.00181
14.85	0.01	0.00342	14.85	0.01	0.00327	14.85	0.01	0.00236	14.85	0.01	0.0013	14.85	0.01	0.00181
14.9	0.01	0.00342	14.9	0.01	0.00327	14.9	0.01	0.00236	14.9	0.01	0.0013	14.9	0.01	0.00181
14.95	0.01	0.00342	14.95	0.01	0.00327	14.95	0.01	0.00236	14.95	0.01	0.0013	14.95	0.01	0.00181
15	0.01	0.00342	15	0.01	0.00327	15	0.01	0.00236	15	0.01	0.0013	15	0.01	0.00181
15.05	0.01	0.00342	15.05	0.01	0.00327	15.05	0.01	0.00236	15.05	0.01	0.0013	15.05	0.01	0.00181
15.1	0.01	0.00342	15.1	0.01	0.00327	15.1	0.01	0.00236	15.1	0.01	0.0013	15.1	0.01	0.00181
15.15	0.01	0.00342	15.15	0.01	0.00327	15.15	0.01	0.00236	15.15	0.01	0.0013	15.15	0.01	0.00181
15.2	0.01	0.00342	15.2	0.01	0.00327	15.2	0.01	0.00236	15.2	0.01	0.0013	15.2	0.01	0.00181
15.25	0.01	0.00342	15.25	0.01	0.00327	15.25	0.01	0.00236	15.25	0.01	0.0013	15.25	0.01	0.00181
15.3	0.01	0.00342	15.3	0.01	0.00327	15.3	0.01	0.00236	15.3	0.01	0.0013	15.3	0.01	0.00181
15.35	0.01	0.00342	15.35	0.01	0.00327	15.35	0.01	0.00236	15.35	0.01	0.0013	15.35	0.01	0.00181
15.4	0.01	0.00342	15.4	0.01	0.00327	15.4	0.01	0.00236	15.4	0.01	0.0013	15.4	0.01	0.00181
15.45	0.01	0.00342	15.45	0.01	0.00327	15.45	0.01	0.00236	15.45	0.01	0.0013	15.45	0.01	0.00181
15.5	0.01	0.00342	15.5	0.01	0.00327	15.5	0.01	0.00236	15.5	0.01	0.0013	15.5	0.01	0.00181
15.55	0.01	0.00342	15.55	0.01	0.00327	15.55	0.01	0.00236	15.55	0.01	0.0013	15.55	0.01	0.00181
15.6	0.01	0.00342	15.6	0.01	0.00327	15.6	0.01	0.00236	15.6	0.01	0.0013	15.6	0.01	0.00181
15.65	0.01	0.00342	15.65	0.01	0.00327	15.65	0.01	0.00236	15.65	0.01	0.0013	15.65	0.01	0.00181
15.7	0.01	0.00342	15.7	0.01	0.00327	15.7	0.01	0.00236	15.7	0.01	0.0013	15.7	0.01	0.00181
15.75	0.01	0.00342	15.75	0.01	0.00327	15.75	0.01	0.00236	15.75	0.01	0.0013	15.75	0.01	0.00181
15.8	0.01	0.00342	15.8	0.01	0.00327	15.8	0.01	0.00236	15.8	0.01	0.0013	15.8	0.01	0.00181
15.85	0.01	0.00342	15.85	0.01	0.00327	15.85	0.01	0.00236	15.85	0.01	0.0013	15.85	0.01	0.00181
15.9	0.01	0.00342	15.9	0.01	0.00327	15.9	0.01	0.00236	15.9	0.01	0.0013	15.9	0.01	0.00181
15.95	0.01	0.00342	15.95	0.01	0.00327	15.95	0.01	0.00236	15.95	0.01	0.0013	15.95	0.01	0.00181
16	0.01	0.00342	16	0.01	0.00327	16	0.01	0.00236	16	0.01	0.0013	16	0.01	0.00181
16.05	0.01	0.00342	16.05	0.01	0.00327	16.05	0.01	0.00236	16.05	0.01	0.0013	16.05	0.01	0.00181
16.1	0.01	0.00342	16.1	0.01	0.00327	16.1	0.01	0.00236	16.1	0.01	0.0013	16.1	0.01	0.00181
16.15	0.01	0.00341	16.15	0.01	0.00327	16.15	0.01	0.00236	16.15	0.01	0.0013	16.15	0.01	0.00181
16.2	0.01	0.00338	16.2	0.01	0.00326	16.2	0.01	0.00236	16.2	0.01	0.0013	16.2	0.01	0.00181
16.25	0.01	0.00334	16.25	0.01	0.00325	16.25	0.01	0.00236	16.25	0.01	0.0013	16.25	0.01	0.00181
16.3	0.01	0.00328	16.3	0.01	0.00322	16.3	0.01	0.00235	16.3	0.01	0.00129	16.3	0.01	0.0018
16.35	0.01	0.00319	16.35	0.01	0.00316	16.35	0.01	0.00233	16.35	0.01	0.00128	16.35	0.01	0.00179
16.4	0.01	0.00308	16.4	0.01	0.00309	16.4	0.01	0.0023	16.4	0.01	0.00127	16.4	0.01	0.00177
16.45	0.01	0.00294	16.45	0.01	0.003	16.45	0.01	0.00226	16.45	0.01	0.00125	16.45	0.01	0.00173
16.5	0.01	0.00277	16.5	0.01	0.00289	16.5	0.01	0.00219	16.5	0.01	0.00121	16.5	0.01	0.00168
16.55	0.01	0.00258	16.55	0.01	0.00277	16.55	0.01	0.00209	16.55	0.01	0.00117	16.55	0.01	0.00161
16.6	0.01	0.0022	16.6	0.01	0.00252	16.6	0.01	0.00187	16.6	0.01	0.00107	16.6	0.01	0.00144
16.65	0.01	0.00184	16.65	0.01	0.00228	16.65	0.01	0.00163	16.65	0.01	0.000954	16.65	0.01	0.00126
16.7	0.01	0.00149	16.7	0.01	0.00204	16.7	0.01	0.00137	16.7	0.01	0.000834	16.7	0.01	0.00106
16.75	0.01	0.00116	16.75	0.01	0.00182	16.75	0.01	0.00109	16.75	0.01	0.000708	16.75	0.01	0.000852
16.8	0.01	0.000852	16.8	0.01	0.00159	16.8	0.01	0.000811	16.8	0.01	0.00058	16.8	0.01	0.000638
16.85	0.01	0.000561	16.85	0.01	0.00138	16.85	0.01	0.000535	16.85	0.01	0.000456	16.85	0.01	0.000431
16.9	0.01	0.000292	16.9	0.01	0.00117	16.9	0.01	0.000317	16.9	0.01	0.000342	16.9	0.01	0.000273
16.95	0.01	4.8e-05	16.95	0.01	0.000964	16.95	0.01	0.00032	16.95	0.01	0.000252	16.95	0.01	0.000267
17	0.01	0.00017	17	0.01	0.000769	17	0.01	0.000529	17	0.01	0.000206	17	0.01	0.000409
17.05	0.01	0.00036	17.05	0.01	0.000582	17.05	0.01	0.000781	17.05	0.01	0.000215	17.05	0.01	0.000586
17.1	0.01	0.000517	17.1	0.01	0.000403	17.1	0.01	0.00103	17.1	0.01	0.000256	17.1	0.01	0.000756
17.15	0.01	0.000644	17.15	0.01	0.000233	17.15	0.01	0.00125	17.15	0.01	0.000302	17.15	0.01	0.000906
17.2	0.01	0.000741	17.2	0.01	7.3e-05	17.2	0.01	0.00144	17.2	0.01	0.000334	17.2	0.01	0.00103
17.25	0.01	0.000806	17.25	0.01	7.8e-05	17.25	0.01	0.00159	17.25	0.01	0.000347	17.25	0.01	0.00112
17.3	0.01	0.000842	17.3	0.01	0.000218	17.3	0.01	0.00169	17.3	0.01	0.000338	17.3	0.01	0.00117
17.35	0.01	0.000851	17.35	0.01	0.000346	17.35	0.01	0.00173	17.35	0.01	0.000309	17.35	0.01	0.00118
17.4	0.01	0.000837	17.4	0.01	0.000461	17.4	0.01	0.00171	17.4	0.01	0.000263	17.4	0.01	0.00114
17.45	0.01	0.000798	17.45	0.01	0.000562	17.45	0.01	0.00162	17.45	0.01	0.000218	17.45	0.01	0.00106
17.5	0.01	0.00074	17.5	0.01	0.000649	17.5	0.01	0.00147	17.5	0.01	0.00021	17.5	0.01	0.000933
17.55	0.01	0.000669	17.55	0.01	0.000717	17.55	0.01	0.00126	17.55	0.01	0.000277	17.55	0.01	0.000753
17.6	0.01	0.000585	17.6	0.01	0.000768	17.6	0.01	0.000996	17.6	0.01	0.000404	17.6	0.01	0.000527
17.65	0.01	0.000495	17.65	0.01	0.0008	17.65	0.01	0.000695	17.65	0.01	0.000565	17.65	0.01	0.000301
17.7	0.01	0.000404	17.7	0.01	0.00082	17.7	0.01	0.000396	17.7	0.01	0.000747	17.7	0.01	0.000322
17.75	0.01	0.000314	17.75	0.01	0.000824	17.75	0.01	0.000325	17.75	0.01	0.000943	17.75	0.01	0.000645
17.8	0.01	0.000228	17.8	0.01	0.000818	17.8	0.01	0.000618	17.8	0.01	0.00115	17.8	0.01	0.00105
17.85	0.01	0.000151	17.85	0.01	0.000806	17.85	0.01	0.00101	17.85	0.01	0.00136	17.85	0.01	0.00148
17.9	0.01	8.1e-05	17.9	0.01	0.000791	17.9	0.01	0.00142	17.9	0.01	0.00157	17.9	0.01	0.00191
17.95	0.01	1.7e-05	17.95	0.01	0.000773	17.95	0.01	0.00184	17.95	0.01	0.00177	17.95	0.01	0.00232
18	0.01	4e-05	18	0.01	0.00075	18	0.01	0.00228	18	0.01	0.00197	18	0.01	0.00268
18.05	0.01	9.2e-05	18.05	0.01	0.000718	18.05	0.01	0.00272	18.05	0.01	0.00215	18.05	0.01	0.00299
18.1	0.01	0.00014	18.1	0.01	0.000671	18.1	0.01	0.00316	18.1	0.01	0.00232	18.1	0.01	0.00324
18.15	0.01	0.000187	18.15	0.01	0.000606	18.15	0.01	0.00359	18.15	0.01	0.00248	18.15	0.01	0.00343
18.2	0.01	0.000232	18.2	0.01	0.00052	18.2	0.01	0.00399	18.2	0.01	0.00262	18.2	0.01	0.00354
18.25	0.01	0.000276	18.25	0.01	0.000413	18.25	0.01	0.00434	18.25	0.01	0.00272	18.25	0.01	0.00358
18.3	0.01	0.000315	18.3	0.01	0.00029	18.3	0.01	0.00463	18.3	0.01	0.00281	18.3	0.01	0.00358
18.35	0.01	0.000348	18.35	0.01	0.000153	18.35	0.01	0.00484	18.35	0.01	0.00287	18.35	0.01	0.00355
18.4	0.01	0.000373	18.4	0.01	1.2e-05	18.4	0.01	0.00497	18.4	0.01	0.0029	18.4	0.01	0.00348
18.45	0.01	0.000388	18.45	0.01	0.000132	18.45	0.01	0.00498	18.45	0.01	0.00287	18.45	0.01	0.0034
18.5	0.01	0.000391	18.5	0.01	0.000266	18.5	0.01	0.00489	18.5	0.01	0.00281	18.5	0.01	0.00332
18.55	0.01	0.000384	18.55	0.01	0.000384	18.55	0.01	0.00473	18.55	0.01	0.00271	18.55	0.01	0.00324
18.6	0.01	0.000366	18.6	0.01	0.000486	18.6	0.01	0.0045	18.6	0.01	0.00257	18.6	0.01	0.00317
18.65	0.01	0.000339	18.65	0.01	0.000564	18.65	0.01	0.00423	18.65	0.01	0.00237	18.65	0.01	0.00309
18.7	0.01	0.000301	18.7	0.01	0.000619	18.7	0.01	0.00393	18.7	0.01	0.00214	18.7	0.01	0.003
18.75	0.01	0.000251	18.75	0.01	0.000651	18.75	0.01	0.00365	18.75	0.01	0.00186	18.75	0.01	0.00289
18.8	0.01	0.000191	18.8	0.01	0.000659	18.8	0.01	0.00338	18.8	0.01	0.00156	18.8	0.01	0.00273
18.85	0.01	0.000122	18.85	0.01	0.000647	18.85	0.01	0.00313	18.85	0.01	0.00123	18.85	0.01	0.00253
18.9	0.01	4.7e-05	18.9	0.01	0.000619	18.9	0.01	0.00288	18.9	0.01	0.000895	18.9	0.01	0.00226
18.95	0.01	3.1e-05	18.95	0.01	0.000578	18.95	0.01	0.00263	18.95	0.01	0.000564	18.95	0.01	0.00193
19	0.01	0.000102	19	0.01	0.000526	19	0.01	0.00236	19	0.01	0.000264	19	0.01	0.00155
19.05	0.01	0.000161	19.05	0.01	0.000466	19.05	0.01	0.00205	19.05	0.01	0.000174	19.05	0.01	0.00111
19.1	0.01	0.000201	19.1	0.01	0.000405	19.1	0.01	0.00169	19.1	0.01	0.000383	19.1	0.01	0.00065
19.15	0.01	0.000221	19.15	0.01	0.000345	19.15	0.01	0.00127	19.15	0.01	0.000589	19.15	0.01	0.000229
19.2	0.01	0.000223	19.2	0.01	0.000287	19.2	0.01	0.000789	19.2	0.01	0.000746	19.2	0.01	0.000385
19.25	0.01	0.00021	19.25	0.01	0.000234	19.25	0.01	0.000305	19.25	0.01	0.000847	19.25	0.01	0.000809
19.3	0.01	0.000187	19.3	0.01	0.000186	19.3	0.01	0.000396	19.3	0.01	0.00089	19.3	0.01	0.00119
19.35	0.01	0.000159	19.35	0.01	0.000143	19.35	0.01	0.000927	19.35	0.01	0.000878	19.35	0.01	0.00151
19.4	0.01	0.000131	19.4	0.01	0.000104	19.4	0.01	0.00146	19.4	0.01	0.000816	19.4	0.01	0.00174
19.45	0.01	0.000104	19.45	0.01	6.9e-05	19.45	0.01	0.00194	19.45	0.01	0.000707	19.45	0.01	0.00187
19.5	0.01	8.2e-05	19.5	0.01	3.6e-05	19.5	0.01	0.00235	19.5	0.01	0.000569	19.5	0.01	0.00188
19.55	0.01	6.4e-05	19.55	0.01	5e-06	19.55	0.01	0.00266	19.55	0.01	0.00042	19.55	0.01	0.00179
19.6	0.01	5.3e-05	19.6	0.01	3.5e-05	19.6	0.01	0.00286	19.6	0.01	0.000278	19.6	0.01	0.0016
19.65	0.01	4.8e-05	19.65	0.01	7.4e-05	19.65	0.01	0.00291	19.65	0.01	0.000174	19.65	0.01	0.00134
19.7	0.01	4.7e-05	19.7	0.01	0.00012	19.7	0.01	0.00281	19.7	0.01	0.000175	19.7	0.01	0.00102
19.75	0.01	4.7e-05	19.75	0.01	0.00017	19.75	0.01	0.00257	19.75	0.01	0.000261	19.75	0.01	0.000667
19.8	0.01	4.7e-05	19.8	0.01	0.000222	19.8	0.01	0.00221	19.8	0.01	0.000358	19.8	0.01	0.000337
19.85	0.01	4.3e-05	19.85	0.01	0.000271	19.85	0.01	0.00178	19.85	0.01	0.000446	19.85	0.01	0.000218
19.9	0.01	3.4e-05	19.9	0.01	0.000316	19.9	0.01	0.00128	19.9	0.01	0.00052	19.9	0.01	0.000458
19.95	0.01	2e-05	19.95	0.01	0.000357	19.95	0.01	0.000774	19.95	0.01	0.000582	19.95	0.01	0.000708
20	0.01	1e-06	20	0.01	0.000393	20	0.01	0.000318	20	0.01	0.000635	20	0.01	0.000897
20.05	0.01	2.1e-05	20.05	0.01	0.000422	20.05	0.01	0.00036	20.05	0.01	0.000682	20.05	0.01	0.00101
20.1	0.01	4.4e-05	20.1	0.01	0.000445	20.1	0.01	0.000738	20.1	0.01	0.000725	20.1	0.01	0.00105
20.15	0.01	6.5e-05	20.15	0.01	0.000458	20.15	0.01	0.00107	20.15	0.01	0.000769	20.15	0.01	0.00102
20.2	0.01	8.3e-05	20.2	0.01	0.000459	20.2	0.01	0.00132	20.2	0.01	0.000824	20.2	0.01	0.000972
20.25	0.01	9.3e-05	20.25	0.01	0.000448	20.25	0.01	0.00147	20.25	0.01	0.000898	20.25	0.01	0.000946
20.3	0.01	9.1e-05	20.3	0.01	0.000421	20.3	0.01	0.00154	20.3	0.01	0.000997	20.3	0.01	0.000971
20.35	0.01	7.6e-05	20.35	0.01	0.000381	20.35	0.01	0.00157	20.35	0.01	0.00113	20.35	0.01	0.00105
20.4	0.01	4.9e-05	20.4	0.01	0.00033	20.4	0.01	0.0016	20.4	0.01	0.00129	20.4	0.01	0.00119
20.45	0.01	1.3e-05	20.45	0.01	0.000272	20.45	0.01	0.00168	20.45	0.01	0.00148	20.45	0.01	0.00138
20.5	0.01	2.3e-05	20.5	0.01	0.000212	20.5	0.01	0.00182	20.5	0.01	0.00169	20.5	0.01	0.0016
20.55	0.01	5.2e-05	20.55	0.01	0.000152	20.55	0.01	0.00201	20.55	0.01	0.00191	20.55	0.01	0.00185
20.6	0.01	7e-05	20.6	0.01	9.2e-05	20.6	0.01	0.00225	20.6	0.01	0.00213	20.6	0.01	0.0021
20.65	0.01	7.5e-05	20.65	0.01	3.5e-05	20.65	0.01	0.00252	20.65	0.01	0.00233	20.65	0.01	0.00236
20.7	0.01	6.8e-05	20.7	0.01	2e-05	20.7	0.01	0.00281	20.7	0.01	0.0025	20.7	0.01	0.00261
20.75	0.01	5e-05	20.75	0.01	7.2e-05	20.75	0.01	0.00309	20.75	0.01	0.00265	20.75	0.01	0.00283
20.8	0.01	2.8e-05	20.8	0.01	0.000121	20.8	0.01	0.00337	20.8	0.01	0.00276	20.8	0.01	0.00304
20.85	0.01	5e-06	20.85	0.01	0.000168	20.85	0.01	0.00362	20.85	0.01	0.00284	20.85	0.01	0.00322
20.9	0.01	1.6e-05	20.9	0.01	0.00021	20.9	0.01	0.00385	20.9	0.01	0.00286	20.9	0.01	0.00336
20.95	0.01	3.4e-05	20.95	0.01	0.000245	20.95	0.01	0.00404	20.95	0.01	0.00283	20.95	0.01	0.00347
21	0.01	4.7e-05	21	0.01	0.000272	21	0.01	0.0042	21	0.01	0.00274	21	0.01	0.00354
21.05	0.01	5.8e-05	21.05	0.01	0.00029	21.05	0.01	0.00431	21.05	0.01	0.0026	21.05	0.01	0.00354
21.1	0.01	6.7e-05	21.1	0.01	0.0003	21.1	0.01	0.00438	21.1	0.01	0.00242	21.1	0.01	0.00348
21.15	0.01	7.5e-05	21.15	0.01	0.000303	21.15	0.01	0.00438	21.15	0.01	0.0022	21.15	0.01	0.00333
21.2	0.01	8.1e-05	21.2	0.01	0.0003	21.2	0.01	0.00431	21.2	0.01	0.00195	21.2	0.01	0.00308
21.25	0.01	8.5e-05	21.25	0.01	0.00029	21.25	0.01	0.00416	21.25	0.01	0.00168	21.25	0.01	0.00274
21.3	0.01	8.6e-05	21.3	0.01	0.000275	21.3	0.01	0.00391	21.3	0.01	0.0014	21.3	0.01	0.00234
21.35	0.01	8.1e-05	21.35	0.01	0.000255	21.35	0.01	0.00356	21.35	0.01	0.00113	21.35	0.01	0.0019
21.4	0.01	6.9e-05	21.4	0.01	0.00023	21.4	0.01	0.00312	21.4	0.01	0.000887	21.4	0.01	0.00144
21.45	0.01	4.7e-05	21.45	0.01	0.000204	21.45	0.01	0.00262	21.45	0.01	0.000695	21.45	0.01	0.001
21.5	0.01	1.9e-05	21.5	0.01	0.000176	21.5	0.01	0.00208	21.5	0.01	0.000559	21.5	0.01	0.000617
21.55	0.01	1.4e-05	21.55	0.01	0.000148	21.55	0.01	0.00155	21.55	0.01	0.000479	21.55	0.01	0.000322
21.6	0.01	4.7e-05	21.6	0.01	0.000119	21.6	0.01	0.00105	21.6	0.01	0.00045	21.6	0.01	0.000172
21.65	0.01	7.6e-05	21.65	0.01	8.9e-05	21.65	0.01	0.000641	21.65	0.01	0.000449	21.65	0.01	0.000148
21.7	0.01	9.9e-05	21.7	0.01	6.1e-05	21.7	0.01	0.000349	21.7	0.01	0.000464	21.7	0.01	0.000172
21.75	0.01	0.000115	21.75	0.01	3.2e-05	21.75	0.01	0.00021	21.75	0.01	0.000485	21.75	0.01	0.000238
21.8	0.01	0.000123	21.8	0.01	5e-06	21.8	0.01	0.000181	21.8	0.01	0.000503	21.8	0.01	0.000335
21.85	0.01	0.00012	21.85	0.01	2.3e-05	21.85	0.01	0.000196	21.85	0.01	0.00051	21.85	0.01	0.000424
21.9	0.01	0.000105	21.9	0.01	5.1e-05	21.9	0.01	0.000241	21.9	0.01	0.000497	21.9	0.01	0.000501
21.95	0.01	8.3e-05	21.95	0.01	7.8e-05	21.95	0.01	0.000289	21.95	0.01	0.000459	21.95	0.01	0.000545
22	0.01	5.8e-05	22	0.01	0.000104	22	0.01	0.000326	22	0.01	0.000394	22	0.01	0.000561
-10	0.06	0.00838	-10	0.06	0.00819	-10	0.06	0.00459	-10	0.06	0.00229	-10	0.06	0.0028
-9.95	0.06	0.00833	-9.95	0.06	0.00823	-9.95	0.06	0.00461	-9.95	0.06	0.00259	-9.95	0.06	0.00276
-9.9	0.06	0.00828	-9.9	0.06	0.00827	-9.9	0.06	0.00465	-9.9	0.06	0.00295	-9.9	0.06	0.00269
-9.85	0.06	0.00823	-9.85	0.06	0.00829	-9.85	0.06	0.00467	-9.85	0.06	0.00333	-9.85	0.06	0.00262
-9.8	0.06	0.00819	-9.8	0.06	0.00831	-9.8	0.06	0.00464	-9.8	0.06	0.0037	-9.8	0.06	0.00259
-9.75	0.06	0.00816	-9.75	0.06	0.00833	-9.75	0.06	0.0046	-9.75	0.06	0.00399	-9.75	0.06	0.00262
-9.7	0.06	0.00814	-9.7	0.06	0.00833	-9.7	0.06	0.00458	-9.7	0.06	0.00417	-9.7	0.06	0.0027
-9.65	0.06	0.00812	-9.65	0.06	0.00833	-9.65	0.06	0.00461	-9.65	0.06	0.00424	-9.65	0.06	0.00284
-9.6	0.06	0.00812	-9.6	0.06	0.00832	-9.6	0.06	0.00468	-9.6	0.06	0.00419	-9.6	0.06	0.00297
-9.55	0.06	0.00812	-9.55	0.06	0.0083	-9.55	0.06	0.0048	-9.55	0.06	0.00405	-9.55	0.06	0.00308
-9.5	0.06	0.00812	-9.5	0.06	0.00826	-9.5	0.06	0.00493	-9.5	0.06	0.00378	-9.5	0.06	0.00315
-9.45	0.06	0.00813	-9.45	0.06	0.00822	-9.45	0.06	0.00501	-9.45	0.06	0.00341	-9.45	0.06	0.00317
-9.4	0.06	0.00813	-9.4	0.06	0.00817	-9.4	0.06	0.00504	-9.4	0.06	0.00295	-9.4	0.06	0.00313
-9.35	0.06	0.00814	-9.35	0.06	0.00812	-9.35	0.06	0.00502	-9.35	0.06	0.00242	-9.35	0.06	0.003
-9.3	0.06	0.00817	-9.3	0.06	0.00808	-9.3	0.06	0.00492	-9.3	0.06	0.00184	-9.3	0.06	0.00282
-9.25	0.06	0.00822	-9.25	0.06	0.00803	-9.25	0.06	0.00474	-9.25	0.06	0.00127	-9.25	0.06	0.00259
-9.2	0.06	0.00829	-9.2	0.06	0.008	-9.2	0.06	0.00449	-9.2	0.06	0.00083	-9.2	0.06	0.00229
-9.15	0.06	0.00837	-9.15	0.06	0.00797	-9.15	0.06	0.00417	-9.15	0.06	0.000775	-9.15	0.06	0.00194
-9.1	0.06	0.00847	-9.1	0.06	0.00796	-9.1	0.06	0.0038	-9.1	0.06	0.00109	-9.1	0.06	0.0016
-9.05	0.06	0.00857	-9.05	0.06	0.00795	-9.05	0.06	0.00336	-9.05	0.06	0.00146	-9.05	0.06	0.00136
-9	0.06	0.00864	-9	0.06	0.00793	-9	0.06	0.0029	-9	0.06	0.00176	-9	0.06	0.00133
-8.95	0.06	0.0087	-8.95	0.06	0.00792	-8.95	0.06	0.00248	-8.95	0.06	0.00196	-8.95	0.06	0.00149
-8.9	0.06	0.00872	-8.9	0.06	0.00791	-8.9	0.06	0.0022	-8.9	0.06	0.00207	-8.9	0.06	0.00164
-8.85	0.06	0.00871	-8.85	0.06	0.0079	-8.85	0.06	0.0021	-8.85	0.06	0.00207	-8.85	0.06	0.00164
-8.8	0.06	0.00866	-8.8	0.06	0.00789	-8.8	0.06	0.00212	-8.8	0.06	0.002	-8.8	0.06	0.00147
-8.75	0.06	0.00859	-8.75	0.06	0.00788	-8.75	0.06	0.00212	-8.75	0.06	0.00187	-8.75	0.06	0.00131
-8.7	0.06	0.0085	-8.7	0.06	0.00788	-8.7	0.06	0.0021	-8.7	0.06	0.0017	-8.7	0.06	0.00141
-8.65	0.06	0.00842	-8.65	0.06	0.00787	-8.65	0.06	0.00214	-8.65	0.06	0.00153	-8.65	0.06	0.00188
-8.6	0.06	0.00835	-8.6	0.06	0.00787	-8.6	0.06	0.00237	-8.6	0.06	0.00136	-8.6	0.06	0.0025
-8.55	0.06	0.0083	-8.55	0.06	0.00786	-8.55	0.06	0.00279	-8.55	0.06	0.00124	-8.55	0.06	0.00304
-8.5	0.06	0.00825	-8.5	0.06	0.00786	-8.5	0.06	0.00328	-8.5	0.06	0.00118	-8.5	0.06	0.00336
-8.45	0.06	0.00821	-8.45	0.06	0.00785	-8.45	0.06	0.00367	-8.45	0.06	0.00123	-8.45	0.06	0.00346
-8.4	0.06	0.00817	-8.4	0.06	0.00785	-8.4	0.06	0.00385	-8.4	0.06	0.00137	-8.4	0.06	0.00337
-8.35	0.06	0.00813	-8.35	0.06	0.00786	-8.35	0.06	0.00384	-8.35	0.06	0.0016	-8.35	0.06	0.00308
-8.3	0.06	0.00811	-8.3	0.06	0.00787	-8.3	0.06	0.00366	-8.3	0.06	0.00189	-8.3	0.06	0.00257
-8.25	0.06	0.0081	-8.25	0.06	0.00788	-8.25	0.06	0.00329	-8.25	0.06	0.00219	-8.25	0.06	0.00187
-8.2	0.06	0.0081	-8.2	0.06	0.00789	-8.2	0.06	0.00278	-8.2	0.06	0.00248	-8.2	0.06	0.00143
-8.15	0.06	0.00812	-8.15	0.06	0.00791	-8.15	0.06	0.0023	-8.15	0.06	0.00275	-8.15	0.06	0.00192
-8.1	0.06	0.00815	-8.1	0.06	0.00794	-8.1	0.06	0.00235	-8.1	0.06	0.00295	-8.1	0.06	0.00285
-8.05	0.06	0.00819	-8.05	0.06	0.00796	-8.05	0.06	0.00302	-8.05	0.06	0.00308	-8.05	0.06	0.00376
-8	0.06	0.00823	-8	0.06	0.00799	-8	0.06	0.00392	-8	0.06	0.0031	-8	0.06	0.00446
-7.95	0.06	0.00827	-7.95	0.06	0.00801	-7.95	0.06	0.00475	-7.95	0.06	0.00298	-7.95	0.06	0.00492
-7.9	0.06	0.00832	-7.9	0.06	0.00804	-7.9	0.06	0.00536	-7.9	0.06	0.00271	-7.9	0.06	0.0051
-7.85	0.06	0.00836	-7.85	0.06	0.00806	-7.85	0.06	0.00569	-7.85	0.06	0.00225	-7.85	0.06	0.00512
-7.8	0.06	0.00841	-7.8	0.06	0.00808	-7.8	0.06	0.00578	-7.8	0.06	0.00163	-7.8	0.06	0.00497
-7.75	0.06	0.00845	-7.75	0.06	0.00809	-7.75	0.06	0.00573	-7.75	0.06	0.000933	-7.75	0.06	0.00468
-7.7	0.06	0.00849	-7.7	0.06	0.0081	-7.7	0.06	0.00551	-7.7	0.06	0.000431	-7.7	0.06	0.00409
-7.65	0.06	0.00851	-7.65	0.06	0.0081	-7.65	0.06	0.00507	-7.65	0.06	0.000876	-7.65	0.06	0.00326
-7.6	0.06	0.00853	-7.6	0.06	0.0081	-7.6	0.06	0.00436	-7.6	0.06	0.00162	-7.6	0.06	0.00232
-7.55	0.06	0.00853	-7.55	0.06	0.00808	-7.55	0.06	0.00349	-7.55	0.06	0.00237	-7.55	0.06	0.00149
-7.5	0.06	0.00852	-7.5	0.06	0.00806	-7.5	0.06	0.00263	-7.5	0.06	0.00309	-7.5	0.06	0.00117
-7.45	0.06	0.00849	-7.45	0.06	0.00805	-7.45	0.06	0.00204	-7.45	0.06	0.00373	-7.45	0.06	0.0016
-7.4	0.06	0.00846	-7.4	0.06	0.00803	-7.4	0.06	0.00199	-7.4	0.06	0.00427	-7.4	0.06	0.00229
-7.35	0.06	0.00842	-7.35	0.06	0.00802	-7.35	0.06	0.00241	-7.35	0.06	0.00466	-7.35	0.06	0.00291
-7.3	0.06	0.00837	-7.3	0.06	0.00801	-7.3	0.06	0.003	-7.3	0.06	0.00485	-7.3	0.06	0.00334
-7.25	0.06	0.00832	-7.25	0.06	0.008	-7.25	0.06	0.00353	-7.25	0.06	0.00484	-7.25	0.06	0.00349
-7.2	0.06	0.00828	-7.2	0.06	0.008	-7.2	0.06	0.00385	-7.2	0.06	0.00467	-7.2	0.06	0.00334
-7.15	0.06	0.00825	-7.15	0.06	0.008	-7.15	0.06	0.00393	-7.15	0.06	0.00439	-7.15	0.06	0.00292
-7.1	0.06	0.00823	-7.1	0.06	0.008	-7.1	0.06	0.0037	-7.1	0.06	0.0041	-7.1	0.06	0.00228
-7.05	0.06	0.00821	-7.05	0.06	0.008	-7.05	0.06	0.00324	-7.05	0.06	0.00382	-7.05	0.06	0.00164
-7	0.06	0.00821	-7	0.06	0.008	-7	0.06	0.00269	-7	0.06	0.00355	-7	0.06	0.00133
-6.95	0.06	0.00821	-6.95	0.06	0.00799	-6.95	0.06	0.00228	-6.95	0.06	0.00333	-6.95	0.06	0.00129
-6.9	0.06	0.00823	-6.9	0.06	0.00799	-6.9	0.06	0.00214	-6.9	0.06	0.00314	-6.9	0.06	0.0013
-6.85	0.06	0.00825	-6.85	0.06	0.00799	-6.85	0.06	0.00213	-6.85	0.06	0.00297	-6.85	0.06	0.00157
-6.8	0.06	0.00827	-6.8	0.06	0.00798	-6.8	0.06	0.00229	-6.8	0.06	0.0028	-6.8	0.06	0.00239
-6.75	0.06	0.00829	-6.75	0.06	0.00798	-6.75	0.06	0.00286	-6.75	0.06	0.00259	-6.75	0.06	0.00359
-6.7	0.06	0.00832	-6.7	0.06	0.00798	-6.7	0.06	0.0039	-6.7	0.06	0.0023	-6.7	0.06	0.00492
-6.65	0.06	0.00834	-6.65	0.06	0.00797	-6.65	0.06	0.00519	-6.65	0.06	0.00195	-6.65	0.06	0.0062
-6.6	0.06	0.00837	-6.6	0.06	0.00797	-6.6	0.06	0.00652	-6.6	0.06	0.00156	-6.6	0.06	0.0072
-6.55	0.06	0.00838	-6.55	0.06	0.00797	-6.55	0.06	0.00766	-6.55	0.06	0.00118	-6.55	0.06	0.00766
-6.5	0.06	0.0084	-6.5	0.06	0.00797	-6.5	0.06	0.0084	-6.5	0.06	0.000909	-6.5	0.06	0.00749
-6.45	0.06	0.00841	-6.45	0.06	0.00797	-6.45	0.06	0.00854	-6.45	0.06	0.000877	-6.45	0.06	0.00687
-6.4	0.06	0.00842	-6.4	0.06	0.00797	-6.4	0.06	0.00811	-6.4	0.06	0.00111	-6.4	0.06	0.00591
-6.35	0.06	0.00843	-6.35	0.06	0.00797	-6.35	0.06	0.00733	-6.35	0.06	0.00148	-6.35	0.06	0.0047
-6.3	0.06	0.00843	-6.3	0.06	0.00797	-6.3	0.06	0.00626	-6.3	0.06	0.00188	-6.3	0.06	0.00332
-6.25	0.06	0.00843	-6.25	0.06	0.00798	-6.25	0.06	0.00498	-6.25	0.06	0.00232	-6.25	0.06	0.00207
-6.2	0.06	0.00842	-6.2	0.06	0.00798	-6.2	0.06	0.00367	-6.2	0.06	0.00276	-6.2	0.06	0.00168
-6.15	0.06	0.0084	-6.15	0.06	0.008	-6.15	0.06	0.00271	-6.15	0.06	0.00317	-6.15	0.06	0.00239
-6.1	0.06	0.00839	-6.1	0.06	0.00801	-6.1	0.06	0.00253	-6.1	0.06	0.00352	-6.1	0.06	0.00338
-6.05	0.06	0.00838	-6.05	0.06	0.00802	-6.05	0.06	0.00302	-6.05	0.06	0.00379	-6.05	0.06	0.0043
-6	0.06	0.00837	-6	0.06	0.00804	-6	0.06	0.00376	-6	0.06	0.00395	-6	0.06	0.00505
-5.95	0.06	0.00836	-5.95	0.06	0.00805	-5.95	0.06	0.00447	-5.95	0.06	0.00399	-5.95	0.06	0.00559
-5.9	0.06	0.00835	-5.9	0.06	0.00806	-5.9	0.06	0.00504	-5.9	0.06	0.00395	-5.9	0.06	0.00587
-5.85	0.06	0.00834	-5.85	0.06	0.00806	-5.85	0.06	0.00543	-5.85	0.06	0.0038	-5.85	0.06	0.0058
-5.8	0.06	0.00834	-5.8	0.06	0.00806	-5.8	0.06	0.00547	-5.8	0.06	0.00359	-5.8	0.06	0.00543
-5.75	0.06	0.00833	-5.75	0.06	0.00806	-5.75	0.06	0.00523	-5.75	0.06	0.00333	-5.75	0.06	0.00473
-5.7	0.06	0.00833	-5.7	0.06	0.00805	-5.7	0.06	0.00468	-5.7	0.06	0.00305	-5.7	0.06	0.00384
-5.65	0.06	0.00833	-5.65	0.06	0.00804	-5.65	0.06	0.00396	-5.65	0.06	0.00272	-5.65	0.06	0.00292
-5.6	0.06	0.00833	-5.6	0.06	0.00803	-5.6	0.06	0.0032	-5.6	0.06	0.00235	-5.6	0.06	0.00211
-5.55	0.06	0.00833	-5.55	0.06	0.00802	-5.55	0.06	0.0026	-5.55	0.06	0.00196	-5.55	0.06	0.00159
-5.5	0.06	0.00833	-5.5	0.06	0.00801	-5.5	0.06	0.00231	-5.5	0.06	0.00155	-5.5	0.06	0.0014
-5.45	0.06	0.00833	-5.45	0.06	0.00801	-5.45	0.06	0.00226	-5.45	0.06	0.00116	-5.45	0.06	0.00137
-5.4	0.06	0.00833	-5.4	0.06	0.008	-5.4	0.06	0.00227	-5.4	0.06	0.000822	-5.4	0.06	0.00139
-5.35	0.06	0.00834	-5.35	0.06	0.008	-5.35	0.06	0.00227	-5.35	0.06	0.000588	-5.35	0.06	0.00149
-5.3	0.06	0.00834	-5.3	0.06	0.008	-5.3	0.06	0.00227	-5.3	0.06	0.000534	-5.3	0.06	0.00173
-5.25	0.06	0.00835	-5.25	0.06	0.008	-5.25	0.06	0.00235	-5.25	0.06	0.000649	-5.25	0.06	0.00206
-5.2	0.06	0.00836	-5.2	0.06	0.008	-5.2	0.06	0.00254	-5.2	0.06	0.000872	-5.2	0.06	0.0023
-5.15	0.06	0.00837	-5.15	0.06	0.00801	-5.15	0.06	0.00273	-5.15	0.06	0.00117	-5.15	0.06	0.0024
-5.1	0.06	0.00838	-5.1	0.06	0.00801	-5.1	0.06	0.00285	-5.1	0.06	0.00154	-5.1	0.06	0.00237
-5.05	0.06	0.00838	-5.05	0.06	0.00801	-5.05	0.06	0.00288	-5.05	0.06	0.00199	-5.05	0.06	0.00214
-5	0.06	0.00839	-5	0.06	0.00802	-5	0.06	0.00276	-5	0.06	0.00246	-5	0.06	0.00171
-4.95	0.06	0.00839	-4.95	0.06	0.00802	-4.95	0.06	0.0025	-4.95	0.06	0.00292	-4.95	0.06	0.00129
-4.9	0.06	0.00838	-4.9	0.06	0.00802	-4.9	0.06	0.00223	-4.9	0.06	0.00334	-4.9	0.06	0.00165
-4.85	0.06	0.00838	-4.85	0.06	0.00802	-4.85	0.06	0.00236	-4.85	0.06	0.00363	-4.85	0.06	0.00267
-4.8	0.06	0.00838	-4.8	0.06	0.00802	-4.8	0.06	0.00305	-4.8	0.06	0.0038	-4.8	0.06	0.00378
-4.75	0.06	0.00837	-4.75	0.06	0.00802	-4.75	0.06	0.00399	-4.75	0.06	0.00387	-4.75	0.06	0.00465
-4.7	0.06	0.00837	-4.7	0.06	0.00802	-4.7	0.06	0.00481	-4.7	0.06	0.00394	-4.7	0.06	0.00522
-4.65	0.06	0.00837	-4.65	0.06	0.00802	-4.65	0.06	0.00538	-4.65	0.06	0.00396	-4.65	0.06	0.00545
-4.6	0.06	0.00837	-4.6	0.06	0.00802	-4.6	0.06	0.00567	-4.6	0.06	0.00396	-4.6	0.06	0.00543
-4.55	0.06	0.00837	-4.55	0.06	0.00802	-4.55	0.06	0.00566	-4.55	0.06	0.00387	-4.55	0.06	0.00522
-4.5	0.06	0.00837	-4.5	0.06	0.00802	-4.5	0.06	0.00554	-4.5	0.06	0.00375	-4.5	0.06	0.00496
-4.45	0.06	0.00837	-4.45	0.06	0.00802	-4.45	0.06	0.00534	-4.45	0.06	0.00356	-4.45	0.06	0.00466
-4.4	0.06	0.00837	-4.4	0.06	0.00802	-4.4	0.06	0.00511	-4.4	0.06	0.00333	-4.4	0.06	0.0043
-4.35	0.06	0.00837	-4.35	0.06	0.00802	-4.35	0.06	0.00484	-4.35	0.06	0.00311	-4.35	0.06	0.00393
-4.3	0.06	0.00836	-4.3	0.06	0.00802	-4.3	0.06	0.00458	-4.3	0.06	0.00293	-4.3	0.06	0.00365
-4.25	0.06	0.00836	-4.25	0.06	0.00802	-4.25	0.06	0.00437	-4.25	0.06	0.00281	-4.25	0.06	0.00344
-4.2	0.06	0.00836	-4.2	0.06	0.00802	-4.2	0.06	0.00424	-4.2	0.06	0.00273	-4.2	0.06	0.00333
-4.15	0.06	0.00837	-4.15	0.06	0.00802	-4.15	0.06	0.00417	-4.15	0.06	0.00269	-4.15	0.06	0.00327
-4.1	0.06	0.00837	-4.1	0.06	0.00802	-4.1	0.06	0.00414	-4.1	0.06	0.00267	-4.1	0.06	0.00324
-4.05	0.06	0.00837	-4.05	0.06	0.00802	-4.05	0.06	0.00413	-4.05	0.06	0.00266	-4.05	0.06	0.00323
-4	0.06	0.00837	-4	0.06	0.00802	-4	0.06	0.00413	-4	0.06	0.00265	-4	0.06	0.00323
-3.95	0.06	0.00837	-3.95	0.06	0.00802	-3.95	0.06	0.00413	-3.95	0.06	0.00265	-3.95	0.06	0.00323
-3.9	0.06	0.00837	-3.9	0.06	0.00802	-3.9	0.06	0.00413	-3.9	0.06	0.00266	-3.9	0.06	0.00323
-3.85	0.06	0.00837	-3.85	0.06	0.00802	-3.85	0.06	0.00413	-3.85	0.06	0.00265	-3.85	0.06	0.00323
-3.8	0.06	0.00837	-3.8	0.06	0.00802	-3.8	0.06	0.00413	-3.8	0.06	0.00265	-3.8	0.06	0.00324
-3.75	0.06	0.00837	-3.75	0.06	0.00802	-3.75	0.06	0.00414	-3.75	0.06	0.00265	-3.75	0.06	0.00325
-3.7	0.06	0.00837	-3.7	0.06	0.00802	-3.7	0.06	0.00416	-3.7	0.06	0.00265	-3.7	0.06	0.00327
-3.65	0.06	0.00837	-3.65	0.06	0.00802	-3.65	0.06	0.00419	-3.65	0.06	0.00265	-3.65	0.06	0.00331
-3.6	0.06	0.00837	-3.6	0.06	0.00802	-3.6	0.06	0.00425	-3.6	0.06	0.00265	-3.6	0.06	0.00337
-3.55	0.06	0.00837	-3.55	0.06	0.00802	-3.55	0.06	0.00432	-3.55	0.06	0.00265	-3.55	0.06	0.00341
-3.5	0.06	0.00837	-3.5	0.06	0.00802	-3.5	0.06	0.00438	-3.5	0.06	0.00266	-3.5	0.06	0.00343
-3.45	0.06	0.00837	-3.45	0.06	0.00802	-3.45	0.06	0.00438	-3.45	0.06	0.00266	-3.45	0.06	0.00343
-3.4	0.06	0.00837	-3.4	0.06	0.00802	-3.4	0.06	0.00438	-3.4	0.06	0.00266	-3.4	0.06	0.00343
-3.35	0.06	0.00837	-3.35	0.06	0.00802	-3.35	0.06	0.00438	-3.35	0.06	0.00266	-3.35	0.06	0.00343
-3.3	0.06	0.00837	-3.3	0.06	0.00802	-3.3	0.06	0.00438	-3.3	0.06	0.00266	-3.3	0.06	0.00343
-3.25	0.06	0.00837	-3.25	0.06	0.00802	-3.25	0.06	0.00438	-3.25	0.06	0.00266	-3.25	0.06	0.00343
-3.2	0.06	0.00837	-3.2	0.06	0.00802	-3.2	0.06	0.00438	-3.2	0.06	0.00266	-3.2	0.06	0.00343
-3.15	0.06	0.00837	-3.15	0.06	0.00802	-3.15	0.06	0.00438	-3.15	0.06	0.00266	-3.15	0.06	0.00343
-3.1	0.06	0.00837	-3.1	0.06	0.00802	-3.1	0.06	0.00438	-3.1	0.06	0.00266	-3.1	0.06	0.00343
-3.05	0.06	0.00837	-3.05	0.06	0.00802	-3.05	0.06	0.00438	-3.05	0.06	0.00266	-3.05	0.06	0.00344
-3	0.06	0.00837	-3	0.06	0.00802	-3	0.06	0.00438	-3	0.06	0.00266	-3	0.06	0.00344
-2.95	0.06	0.00837	-2.95	0.06	0.00802	-2.95	0.06	0.00438	-2.95	0.06	0.00266	-2.95	0.06	0.00344
-2.9	0.06	0.00837	-2.9	0.06	0.00802	-2.9	0.06	0.00438	-2.9	0.06	0.00266	-2.9	0.06	0.00344
-2.85	0.06	0.00837	-2.85	0.06	0.00802	-2.85	0.06	0.00438	-2.85	0.06	0.00266	-2.85	0.06	0.00344
-2.8	0.06	0.00837	-2.8	0.06	0.00802	-2.8	0.06	0.00438	-2.8	0.06	0.00266	-2.8	0.06	0.00344
-2.75	0.06	0.00837	-2.75	0.06	0.00802	-2.75	0.06	0.00438	-2.75	0.06	0.00266	-2.75	0.06	0.00344
-2.7	0.06	0.00837	-2.7	0.06	0.00803	-2.7	0.06	0.00438	-2.7	0.06	0.00266	-2.7	0.06	0.00344
-2.65	0.06	0.00837	-2.65	0.06	0.00803	-2.65	0.06	0.00438	-2.65	0.06	0.00266	-2.65	0.06	0.00344
-2.6	0.06	0.00838	-2.6	0.06	0.00803	-2.6	0.06	0.00438	-2.6	0.06	0.00266	-2.6	0.06	0.00344
-2.55	0.06	0.00838	-2.55	0.06	0.00803	-2.55	0.06	0.00438	-2.55	0.06	0.00266	-2.55	0.06	0.00344
-2.5	0.06	0.00838	-2.5	0.06	0.00803	-2.5	0.06	0.00438	-2.5	0.06	0.00266	-2.5	0.06	0.00344
-2.45	0.06	0.00838	-2.45	0.06	0.00803	-2.45	0.06	0.00439	-2.45	0.06	0.00266	-2.45	0.06	0.00344
-2.4	0.06	0.00838	-2.4	0.06	0.00803	-2.4	0.06	0.00439	-2.4	0.06	0.00266	-2.4	0.06	0.00344
-2.35	0.06	0.00838	-2.35	0.06	0.00803	-2.35	0.06	0.00439	-2.35	0.06	0.00266	-2.35	0.06	0.00344
-2.3	0.06	0.00838	-2.3	0.06	0.00803	-2.3	0.06	0.00439	-2.3	0.06	0.00266	-2.3	0.06	0.00344
-2.25	0.06	0.00838	-2.25	0.06	0.00803	-2.25	0.06	0.00439	-2.25	0.06	0.00266	-2.25	0.06	0.00344
-2.2	0.06	0.00838	-2.2	0.06	0.00803	-2.2	0.06	0.00439	-2.2	0.06	0.00266	-2.2	0.06	0.00344
-2.15	0.06	0.00838	-2.15	0.06	0.00803	-2.15	0.06	0.00439	-2.15	0.06	0.00266	-2.15	0.06	0.00344
-2.1	0.06	0.00838	-2.1	0.06	0.00803	-2.1	0.06	0.00439	-2.1	0.06	0.00266	-2.1	0.06	0.00344
-2.05	0.06	0.00838	-2.05	0.06	0.00803	-2.05	0.06	0.00439	-2.05	0.06	0.00266	-2.05	0.06	0.00344
-2	0.06	0.00838	-2	0.06	0.00803	-2	0.06	0.00439	-2	0.06	0.00266	-2	0.06	0.00344
-1.95	0.06	0.00838	-1.95	0.06	0.00803	-1.95	0.06	0.00439	-1.95	0.06	0.00266	-1.95	0.06	0.00344
-1.9	0.06	0.00838	-1.9	0.06	0.00803	-1.9	0.06	0.00439	-1.9	0.06	0.00266	-1.9	0.06	0.00344
-1.85	0.06	0.00838	-1.85	0.06	0.00803	-1.85	0.06	0.00439	-1.85	0.06	0.00266	-1.85	0.06	0.00344
-1.8	0.06	0.00838	-1.8	0.06	0.00803	-1.8	0.06	0.00439	-1.8	0.06	0.00267	-1.8	0.06	0.00344
-1.75	0.06	0.00838	-1.75	0.06	0.00803	-1.75	0.06	0.00439	-1.75	0.06	0.00267	-1.75	0.06	0.00344
-1.7	0.06	0.00838	-1.7	0.06	0.00803	-1.7	0.06	0.00439	-1.7	0.06	0.00267	-1.7	0.06	0.00344
-1.65	0.06	0.00838	-1.65	0.06	0.00803	-1.65	0.06	0.00439	-1.65	0.06	0.00267	-1.65	0.06	0.00344
-1.6	0.06	0.00838	-1.6	0.06	0.00803	-1.6	0.06	0.00439	-1.6	0.06	0.00267	-1.6	0.06	0.00344
-1.55	0.06	0.00838	-1.55	0.06	0.00803	-1.55	0.06	0.00439	-1.55	0.06	0.00267	-1.55	0.06	0.00344
-1.5	0.06	0.00838	-1.5	0.06	0.00803	-1.5	0.06	0.00439	-1.5	0.06	0.00267	-1.5	0.06	0.00344
-1.45	0.06	0.00838	-1.45	0.06	0.00803	-1.45	0.06	0.00439	-1.45	0.06	0.00267	-1.45	0.06	0.00344
-1.4	0.06	0.00838	-1.4	0.06	0.00803	-1.4	0.06	0.00439	-1.4	0.06	0.00267	-1.4	0.06	0.00344
-1.35	0.06	0.00838	-1.35	0.06	0.00803	-1.35	0.06	0.00439	-1.35	0.06	0.00267	-1.35	0.06	0.00344
-1.3	0.06	0.00838	-1.3	0.06	0.00803	-1.3	0.06	0.00439	-1.3	0.06	0.00267	-1.3	0.06	0.00344
-1.25	0.06	0.00838	-1.25	0.06	0.00803	-1.25	0.06	0.00439	-1.25	0.06	0.00267	-1.25	0.06	0.00344
-1.2	0.06	0.00838	-1.2	0.06	0.00803	-1.2	0.06	0.00439	-1.2	0.06	0.00267	-1.2	0.06	0.00345
-1.15	0.06	0.00838	-1.15	0.06	0.00803	-1.15	0.06	0.00439	-1.15	0.06	0.00267	-1.15	0.06	0.00345
-1.1	0.06	0.00838	-1.1	0.06	0.00803	-1.1	0.06	0.00439	-1.1	0.06	0.00267	-1.1	0.06	0.00345
-1.05	0.06	0.00838	-1.05	0.06	0.00803	-1.05	0.06	0.00439	-1.05	0.06	0.00267	-1.05	0.06	0.00345
-1	0.06	0.00838	-1	0.06	0.00803	-1	0.06	0.00439	-1	0.06	0.00267	-1	0.06	0.00345
-0.95	0.06	0.00838	-0.95	0.06	0.00803	-0.95	0.06	0.00439	-0.95	0.06	0.00267	-0.95	0.06	0.00345
-0.9	0.06	0.00838	-0.9	0.06	0.00803	-0.9	0.06	0.00439	-0.9	0.06	0.00267	-0.9	0.06	0.00345
-0.85	0.06	0.00838	-0.85	0.06	0.00803	-0.85	0.06	0.00439	-0.85	0.06	0.00267	-0.85	0.06	0.00345
-0.8	0.06	0.00838	-0.8	0.06	0.00803	-0.8	0.06	0.00439	-0.8	0.06	0.00267	-0.8	0.06	0.00345
-0.75	0.06	0.00838	-0.75	0.06	0.00803	-0.75	0.06	0.00439	-0.75	0.06	0.00267	-0.75	0.06	0.00345
-0.7	0.06	0.00838	-0.7	0.06	0.00803	-0.7	0.06	0.00439	-0.7	0.06	0.00267	-0.7	0.06	0.00345
-0.65	0.06	0.00838	-0.65	0.06	0.00803	-0.65	0.06	0.0044	-0.65	0.06	0.00267	-0.65	0.06	0.00345
-0.6	0.06	0.00838	-0.6	0.06	0.00803	-0.6	0.06	0.0044	-0.6	0.06	0.00267	-0.6	0.06	0.00345
-0.55	0.06	0.00838	-0.55	0.06	0.00803	-0.55	0.06	0.0044	-0.55	0.06	0.00267	-0.55	0.06	0.00345
-0.5	0.06	0.00838	-0.5	0.06	0.00803	-0.5	0.06	0.0044	-0.5	0.06	0.00267	-0.5	0.06	0.00345
-0.45	0.06	0.00838	-0.45	0.06	0.00803	-0.45	0.06	0.0044	-0.45	0.06	0.00267	-0.45	0.06	0.00345
-0.4	0.06	0.00838	-0.4	0.06	0.00803	-0.4	0.06	0.0044	-0.4	0.06	0.00267	-0.4	0.06	0.00345
-0.35	0.06	0.00838	-0.35	0.06	0.00803	-0.35	0.06	0.0044	-0.35	0.06	0.00267	-0.35	0.06	0.00345
-0.3	0.06	0.00838	-0.3	0.06	0.00803	-0.3	0.06	0.0044	-0.3	0.06	0.00267	-0.3	0.06	0.00345
-0.25	0.06	0.00838	-0.25	0.06	0.00803	-0.25	0.06	0.0044	-0.25	0.06	0.00267	-0.25	0.06	0.00345
-0.2	0.06	0.00838	-0.2	0.06	0.00803	-0.2	0.06	0.0044	-0.2	0.06	0.00267	-0.2	0.06	0.00345
-0.15	0.06	0.00838	-0.15	0.06	0.00803	-0.15	0.06	0.0044	-0.15	0.06	0.00267	-0.15	0.06	0.00345
-0.1	0.06	0.00838	-0.1	0.06	0.00803	-0.1	0.06	0.0044	-0.1	0.06	0.00267	-0.1	0.06	0.00345
-0.05	0.06	0.00838	-0.05	0.06	0.00803	-0.05	0.06	0.0044	-0.05	0.06	0.00267	-0.05	0.06	0.00345
0	0.06	0.00838	0	0.06	0.00803	0	0.06	0.0044	0	0.06	0.00267	0	0.06	0.00345
0.05	0.06	0.00838	0.05	0.06	0.00803	0.05	0.06	0.0044	0.05	0.06	0.00267	0.05	0.06	0.00345
0.1	0.06	0.00838	0.1	0.06	0.00803	0.1	0.06	0.0044	0.1	0.06	0.00267	0.1	0.06	0.00345
0.15	0.06	0.00838	0.15	0.06	0.00803	0.15	0.06	0.0044	0.15	0.06	0.00267	0.15	0.06	0.00345
0.2	0.06	0.00838	0.2	0.06	0.00803	0.2	0.06	0.0044	0.2	0.06	0.00267	0.2	0.06	0.00345
0.25	0.06	0.00838	0.25	0.06	0.00803	0.25	0.06	0.0044	0.25	0.06	0.00267	0.25	0.06	0.00345
0.3	0.06	0.00838	0.3	0.06	0.00803	0.3	0.06	0.0044	0.3	0.06	0.00267	0.3	0.06	0.00345
0.35	0.06	0.00838	0.35	0.06	0.00803	0.35	0.06	0.0044	0.35	0.06	0.00267	0.35	0.06	0.00345
0.4	0.06	0.00838	0.4	0.06	0.00803	0.4	0.06	0.0044	0.4	0.06	0.00267	0.4	0.06	0.00345
0.45	0.06	0.00838	0.45	0.06	0.00803	0.45	0.06	0.0044	0.45	0.06	0.00267	0.45	0.06	0.00345
0.5	0.06	0.00838	0.5	0.06	0.00803	0.5	0.06	0.0044	0.5	0.06	0.00267	0.5	0.06	0.00345
0.55	0.06	0.00838	0.55	0.06	0.00803	0.55	0.06	0.0044	0.55	0.06	0.00267	0.55	0.06	0.00345
0.6	0.06	0.00838	0.6	0.06	0.00803	0.6	0.06	0.0044	0.6	0.06	0.00267	0.6	0.06	0.00345
0.65	0.06	0.00838	0.65	0.06	0.00803	0.65	0.06	0.0044	0.65	0.06	0.00267	0.65	0.06	0.00345
0.7	0.06	0.00838	0.7	0.06	0.00803	0.7	0.06	0.0044	0.7	0.06	0.00268	0.7	0.06	0.00345
0.75	0.06	0.00838	0.75	0.06	0.00803	0.75	0.06	0.0044	0.75	0.06	0.00268	0.75	0.06	0.00345
0.8	0.06	0.00838	0.8	0.06	0.00803	0.8	0.06	0.0044	0.8	0.06	0.00268	0.8	0.06	0.00345
0.85	0.06	0.00838	0.85	0.06	0.00803	0.85	0.06	0.0044	0.85	0.06	0.00268	0.85	0.06	0.00345
0.9	0.06	0.00838	0.9	0.06	0.00803	0.9	0.06	0.0044	0.9	0.06	0.00268	0.9	0.06	0.00345
0.95	0.06	0.00838	0.95	0.06	0.00803	0.95	0.06	0.0044	0.95	0.06	0.00268	0.95	0.06	0.00345
1	0.06	0.00838	1	0.06	0.00803	1	0.06	0.0044	1	0.06	0.00268	1	0.06	0.00345
1.05	0.06	0.00838	1.05	0.06	0.00803	1.05	0.06	0.0044	1.05	0.06	0.00268	1.05	0.06	0.00346
1.1	0.06	0.00838	1.1	0.06	0.00803	1.1	0.06	0.0044	1.1	0.06	0.00268	1.1	0.06	0.00346
1.15	0.06	0.00838	1.15	0.06	0.00803	1.15	0.06	0.0044	1.15	0.06	0.00268	1.15	0.06	0.00346
1.2	0.06	0.00838	1.2	0.06	0.00803	1.2	0.06	0.0044	1.2	0.06	0.00268	1.2	0.06	0.00346
1.25	0.06	0.00838	1.25	0.06	0.00803	1.25	0.06	0.0044	1.25	0.06	0.00268	1.25	0.06	0.00346
1.3	0.06	0.00838	1.3	0.06	0.00803	1.3	0.06	0.0044	1.3	0.06	0.00268	1.3	0.06	0.00346
1.35	0.06	0.00838	1.35	0.06	0.00803	1.35	0.06	0.0044	1.35	0.06	0.00268	1.35	0.06	0.00346
1.4	0.06	0.00838	1.4	0.06	0.00803	1.4	0.06	0.0044	1.4	0.06	0.00268	1.4	0.06	0.00346
1.45	0.06	0.00838	1.45	0.06	0.00803	1.45	0.06	0.0044	1.45	0.06	0.00268	1.45	0.06	0.00346
1.5	0.06	0.00838	1.5	0.06	0.00803	1.5	0.06	0.0044	1.5	0.06	0.00268	1.5	0.06	0.00346
1.55	0.06	0.00838	1.55	0.06	0.00803	1.55	0.06	0.0044	1.55	0.06	0.00268	1.55	0.06	0.00346
1.6	0.06	0.00838	1.6	0.06	0.00803	1.6	0.06	0.0044	1.6	0.06	0.00268	1.6	0.06	0.00346
1.65	0.06	0.00838	1.65	0.06	0.00803	1.65	0.06	0.0044	1.65	0.06	0.00268	1.65	0.06	0.00346
1.7	0.06	0.00838	1.7	0.06	0.00803	1.7	0.06	0.00441	1.7	0.06	0.00268	1.7	0.06	0.00346
1.75	0.06	0.00838	1.75	0.06	0.00803	1.75	0.06	0.00441	1.75	0.06	0.00268	1.75	0.06	0.00346
1.8	0.06	0.00838	1.8	0.06	0.00803	1.8	0.06	0.00441	1.8	0.06	0.00268	1.8	0.06	0.00346
1.85	0.06	0.00838	1.85	0.06	0.00803	1.85	0.06	0.00441	1.85	0.06	0.00268	1.85	0.06	0.00346
1.9	0.06	0.00838	1.9	0.06	0.00803	1.9	0.06	0.00441	1.9	0.06	0.00268	1.9	0.06	0.00346
1.95	0.06	0.00838	1.95	0.06	0.00803	1.95	0.06	0.00441	1.95	0.06	0.00268	1.95	0.06	0.00346
2	0.06	0.00838	2	0.06	0.00803	2	0.06	0.00441	2	0.06	0.00268	2	0.06	0.00346
2.05	0.06	0.00838	2.05	0.06	0.00803	2.05	0.06	0.00441	2.05	0.06	0.00268	2.05	0.06	0.00346
2.1	0.06	0.00838	2.1	0.06	0.00803	2.1	0.06	0.00441	2.1	0.06	0.00268	2.1	0.06	0.00346
2.15	0.06	0.00838	2.15	0.06	0.00803	2.15	0.06	0.00441	2.15	0.06	0.00268	2.15	0.06	0.00346
2.2	0.06	0.00838	2.2	0.06	0.00803	2.2	0.06	0.00441	2.2	0.06	0.00268	2.2	0.06	0.00346
2.25	0.06	0.00838	2.25	0.06	0.00803	2.25	0.06	0.00441	2.25	0.06	0.00268	2.25	0.06	0.00346
2.3	0.06	0.00838	2.3	0.06	0.00803	2.3	0.06	0.00441	2.3	0.06	0.00268	2.3	0.06	0.00346
2.35	0.06	0.00838	2.35	0.06	0.00803	2.35	0.06	0.00441	2.35	0.06	0.00268	2.35	0.06	0.00346
2.4	0.06	0.00838	2.4	0.06	0.00803	2.4	0.06	0.00441	2.4	0.06	0.00268	2.4	0.06	0.00346
2.45	0.06	0.00838	2.45	0.06	0.00803	2.45	0.06	0.00441	2.45	0.06	0.00268	2.45	0.06	0.00346
2.5	0.06	0.00838	2.5	0.06	0.00803	2.5	0.06	0.00441	2.5	0.06	0.00268	2.5	0.06	0.00346
2.55	0.06	0.00838	2.55	0.06	0.00803	2.55	0.06	0.00441	2.55	0.06	0.00268	2.55	0.06	0.00346
2.6	0.06	0.00838	2.6	0.06	0.00803	2.6	0.06	0.00441	2.6	0.06	0.00268	2.6	0.06	0.00346
2.65	0.06	0.00838	2.65	0.06	0.00803	2.65	0.06	0.00441	2.65	0.06	0.00268	2.65	0.06	0.00346
2.7	0.06	0.00838	2.7	0.06	0.00803	2.7	0.06	0.00441	2.7	0.06	0.00268	2.7	0.06	0.00346
2.75	0.06	0.00838	2.75	0.06	0.00803	2.75	0.06	0.00441	2.75	0.06	0.00268	2.75	0.06	0.00346
2.8	0.06	0.00838	2.8	0.06	0.00803	2.8	0.06	0.00441	2.8	0.06	0.00268	2.8	0.06	0.00346
2.85	0.06	0.00838	2.85	0.06	0.00803	2.85	0.06	0.00441	2.85	0.06	0.00268	2.85	0.06	0.00346
2.9	0.06	0.00838	2.9	0.06	0.00803	2.9	0.06	0.00441	2.9	0.06	0.00268	2.9	0.06	0.00346
2.95	0.06	0.00838	2.95	0.06	0.00803	2.95	0.06	0.00441	2.95	0.06	0.00268	2.95	0.06	0.00346
3	0.06	0.00838	3	0.06	0.00803	3	0.06	0.00441	3	0.06	0.00268	3	0.06	0.00346
3.05	0.06	0.00838	3.05	0.06	0.00803	3.05	0.06	0.00441	3.05	0.06	0.00268	3.05	0.06	0.00346
3.1	0.06	0.00838	3.1	0.06	0.00803	3.1	0.06	0.00441	3.1	0.06	0.00268	3.1	0.06	0.00346
3.15	0.06	0.00838	3.15	0.06	0.00803	3.15	0.06	0.00441	3.15	0.06	0.00268	3.15	0.06	0.00346
3.2	0.06	0.00838	3.2	0.06	0.00803	3.2	0.06	0.00441	3.2	0.06	0.00268	3.2	0.06	0.00346
3.25	0.06	0.00838	3.25	0.06	0.00803	3.25	0.06	0.00441	3.25	0.06	0.00268	3.25	0.06	0.00346
3.3	0.06	0.00838	3.3	0.06	0.00803	3.3	0.06	0.00441	3.3	0.06	0.00268	3.3	0.06	0.00346
3.35	0.06	0.00838	3.35	0.06	0.00803	3.35	0.06	0.00441	3.35	0.06	0.00268	3.35	0.06	0.00346
3.4	0.06	0.00838	3.4	0.06	0.00803	3.4	0.06	0.00441	3.4	0.06	0.00268	3.4	0.06	0.00346
3.45	0.06	0.00838	3.45	0.06	0.00803	3.45	0.06	0.00441	3.45	0.06	0.00268	3.45	0.06	0.00346
3.5	0.06	0.00838	3.5	0.06	0.00803	3.5	0.06	0.00441	3.5	0.06	0.00268	3.5	0.06	0.00346
3.55	0.06	0.00838	3.55	0.06	0.00803	3.55	0.06	0.00441	3.55	0.06	0.00268	3.55	0.06	0.00346
3.6	0.06	0.00838	3.6	0.06	0.00803	3.6	0.06	0.00441	3.6	0.06	0.00268	3.6	0.06	0.00346
3.65	0.06	0.00838	3.65	0.06	0.00803	3.65	0.06	0.00441	3.65	0.06	0.00268	3.65	0.06	0.00346
3.7	0.06	0.00837	3.7	0.06	0.00803	3.7	0.06	0.00441	3.7	0.06	0.00268	3.7	0.06	0.00346
3.75	0.06	0.00837	3.75	0.06	0.00803	3.75	0.06	0.00441	3.75	0.06	0.00268	3.75	0.06	0.00346
3.8	0.06	0.00837	3.8	0.06	0.00803	3.8	0.06	0.00441	3.8	0.06	0.00268	3.8	0.06	0.00346
3.85	0.06	0.00837	3.85	0.06	0.00803	3.85	0.06	0.00441	3.85	0.06	0.00268	3.85	0.06	0.00346
3.9	0.06	0.00837	3.9	0.06	0.00803	3.9	0.06	0.00441	3.9	0.06	0.00268	3.9	0.06	0.00346
3.95	0.06	0.00837	3.95	0.06	0.00803	3.95	0.06	0.00441	3.95	0.06	0.00268	3.95	0.06	0.00346
4	0.06	0.00837	4	0.06	0.00803	4	0.06	0.00441	4	0.06	0.00268	4	0.06	0.00346
4.05	0.06	0.00837	4.05	0.06	0.00802	4.05	0.06	0.00441	4.05	0.06	0.00268	4.05	0.06	0.00346
4.1	0.06	0.00837	4.1	0.06	0.00802	4.1	0.06	0.00441	4.1	0.06	0.00269	4.1	0.06	0.00346
4.15	0.06	0.00837	4.15	0.06	0.00802	4.15	0.06	0.00441	4.15	0.06	0.00269	4.15	0.06	0.00346
4.2	0.06	0.00837	4.2	0.06	0.00802	4.2	0.06	0.00441	4.2	0.06	0.00269	4.2	0.06	0.00346
4.25	0.06	0.00837	4.25	0.06	0.00802	4.25	0.06	0.00441	4.25	0.06	0.00269	4.25	0.06	0.00346
4.3	0.06	0.00837	4.3	0.06	0.00802	4.3	0.06	0.00441	4.3	0.06	0.00269	4.3	0.06	0.00346
4.35	0.06	0.00837	4.35	0.06	0.00802	4.35	0.06	0.00441	4.35	0.06	0.00269	4.35	0.06	0.00346
4.4	0.06	0.00837	4.4	0.06	0.00802	4.4	0.06	0.00441	4.4	0.06	0.00269	4.4	0.06	0.00347
4.45	0.06	0.00837	4.45	0.06	0.00802	4.45	0.06	0.00441	4.45	0.06	0.00269	4.45	0.06	0.00347
4.5	0.06	0.00837	4.5	0.06	0.00802	4.5	0.06	0.00441	4.5	0.06	0.00269	4.5	0.06	0.00347
4.55	0.06	0.00837	4.55	0.06	0.00802	4.55	0.06	0.00441	4.55	0.06	0.00269	4.55	0.06	0.00347
4.6	0.06	0.00837	4.6	0.06	0.00802	4.6	0.06	0.00441	4.6	0.06	0.00269	4.6	0.06	0.00347
4.65	0.06	0.00837	4.65	0.06	0.00802	4.65	0.06	0.00441	4.65	0.06	0.00269	4.65	0.06	0.00347
4.7	0.06	0.00837	4.7	0.06	0.00802	4.7	0.06	0.00441	4.7	0.06	0.00269	4.7	0.06	0.00347
4.75	0.06	0.00837	4.75	0.06	0.00802	4.75	0.06	0.00441	4.75	0.06	0.00269	4.75	0.06	0.00347
4.8	0.06	0.00837	4.8	0.06	0.00802	4.8	0.06	0.00441	4.8	0.06	0.00269	4.8	0.06	0.00347
4.85	0.06	0.00837	4.85	0.06	0.00802	4.85	0.06	0.00441	4.85	0.06	0.00269	4.85	0.06	0.00347
4.9	0.06	0.00837	4.9	0.06	0.00802	4.9	0.06	0.00441	4.9	0.06	0.00269	4.9	0.06	0.00347
4.95	0.06	0.00837	4.95	0.06	0.00802	4.95	0.06	0.00441	4.95	0.06	0.00269	4.95	0.06	0.00347
5	0.06	0.00837	5	0.06	0.00802	5	0.06	0.00441	5	0.06	0.00269	5	0.06	0.00347
5.05	0.06	0.00837	5.05	0.06	0.00802	5.05	0.06	0.00441	5.05	0.06	0.00269	5.05	0.06	0.00347
5.1	0.06	0.00837	5.1	0.06	0.00802	5.1	0.06	0.00441	5.1	0.06	0.00269	5.1	0.06	0.00347
5.15	0.06	0.00837	5.15	0.06	0.00802	5.15	0.06	0.00441	5.15	0.06	0.00269	5.15	0.06	0.00347
5.2	0.06	0.00837	5.2	0.06	0.00802	5.2	0.06	0.00441	5.2	0.06	0.00269	5.2	0.06	0.00347
5.25	0.06	0.00837	5.25	0.06	0.00802	5.25	0.06	0.00441	5.25	0.06	0.00269	5.25	0.06	0.00347
5.3	0.06	0.00837	5.3	0.06	0.00802	5.3	0.06	0.00441	5.3	0.06	0.00269	5.3	0.06	0.00347
5.35	0.06	0.00837	5.35	0.06	0.00802	5.35	0.06	0.00441	5.35	0.06	0.00269	5.35	0.06	0.00347
5.4	0.06	0.00837	5.4	0.06	0.00802	5.4	0.06	0.00441	5.4	0.06	0.00269	5.4	0.06	0.00347
5.45	0.06	0.00837	5.45	0.06	0.00802	5.45	0.06	0.00441	5.45	0.06	0.00269	5.45	0.06	0.00347
5.5	0.06	0.00837	5.5	0.06	0.00802	5.5	0.06	0.00441	5.5	0.06	0.00269	5.5	0.06	0.00347
5.55	0.06	0.00837	5.55	0.06	0.00802	5.55	0.06	0.00441	5.55	0.06	0.00269	5.55	0.06	0.00347
5.6	0.06	0.00837	5.6	0.06	0.00802	5.6	0.06	0.00441	5.6	0.06	0.00269	5.6	0.06	0.00347
5.65	0.06	0.00837	5.65	0.06	0.00802	5.65	0.06	0.00441	5.65	0.06	0.00269	5.65	0.06	0.00347
5.7	0.06	0.00836	5.7	0.06	0.00802	5.7	0.06	0.00441	5.7	0.06	0.00269	5.7	0.06	0.00347
5.75	0.06	0.00836	5.75	0.06	0.00802	5.75	0.06	0.00441	5.75	0.06	0.00269	5.75	0.06	0.00347
5.8	0.06	0.00836	5.8	0.06	0.00802	5.8	0.06	0.00441	5.8	0.06	0.00269	5.8	0.06	0.00347
5.85	0.06	0.00836	5.85	0.06	0.00802	5.85	0.06	0.00441	5.85	0.06	0.00269	5.85	0.06	0.00347
5.9	0.06	0.00836	5.9	0.06	0.00802	5.9	0.06	0.00441	5.9	0.06	0.00269	5.9	0.06	0.00347
5.95	0.06	0.00836	5.95	0.06	0.00802	5.95	0.06	0.00441	5.95	0.06	0.00269	5.95	0.06	0.00347
6	0.06	0.00836	6	0.06	0.00802	6	0.06	0.00441	6	0.06	0.00269	6	0.06	0.00347
6.05	0.06	0.00836	6.05	0.06	0.00801	6.05	0.06	0.00441	6.05	0.06	0.00269	6.05	0.06	0.00347
6.1	0.06	0.00836	6.1	0.06	0.00801	6.1	0.06	0.00441	6.1	0.06	0.00269	6.1	0.06	0.00347
6.15	0.06	0.00836	6.15	0.06	0.00801	6.15	0.06	0.00441	6.15	0.06	0.00269	6.15	0.06	0.00347
6.2	0.06	0.00836	6.2	0.06	0.00801	6.2	0.06	0.00441	6.2	0.06	0.00269	6.2	0.06	0.00347
6.25	0.06	0.00836	6.25	0.06	0.00801	6.25	0.06	0.00441	6.25	0.06	0.00269	6.25	0.06	0.00347
6.3	0.06	0.00836	6.3	0.06	0.00801	6.3	0.06	0.00441	6.3	0.06	0.00269	6.3	0.06	0.00347
6.35	0.06	0.00836	6.35	0.06	0.00801	6.35	0.06	0.00441	6.35	0.06	0.00269	6.35	0.06	0.00347
6.4	0.06	0.00836	6.4	0.06	0.00801	6.4	0.06	0.00441	6.4	0.06	0.00269	6.4	0.06	0.00347
6.45	0.06	0.00836	6.45	0.06	0.00801	6.45	0.06	0.00441	6.45	0.06	0.00269	6.45	0.06	0.00347
6.5	0.06	0.00836	6.5	0.06	0.00801	6.5	0.06	0.00441	6.5	0.06	0.00269	6.5	0.06	0.00347
6.55	0.06	0.00836	6.55	0.06	0.00801	6.55	0.06	0.00441	6.55	0.06	0.00269	6.55	0.06	0.00347
6.6	0.06	0.00836	6.6	0.06	0.00801	6.6	0.06	0.00442	6.6	0.06	0.00269	6.6	0.06	0.00347
6.65	0.06	0.00836	6.65	0.06	0.00801	6.65	0.06	0.00442	6.65	0.06	0.00269	6.65	0.06	0.00347
6.7	0.06	0.00836	6.7	0.06	0.00801	6.7	0.06	0.00442	6.7	0.06	0.00269	6.7	0.06	0.00347
6.75	0.06	0.00836	6.75	0.06	0.00801	6.75	0.06	0.00442	6.75	0.06	0.00269	6.75	0.06	0.00347
6.8	0.06	0.00836	6.8	0.06	0.00801	6.8	0.06	0.00442	6.8	0.06	0.00269	6.8	0.06	0.00347
6.85	0.06	0.00836	6.85	0.06	0.00801	6.85	0.06	0.00442	6.85	0.06	0.00269	6.85	0.06	0.00347
6.9	0.06	0.00836	6.9	0.06	0.00801	6.9	0.06	0.00442	6.9	0.06	0.00269	6.9	0.06	0.00347
6.95	0.06	0.00836	6.95	0.06	0.00801	6.95	0.06	0.00442	6.95	0.06	0.00269	6.95	0.06	0.00347
7	0.06	0.00836	7	0.06	0.00801	7	0.06	0.00442	7	0.06	0.00269	7	0.06	0.00347
7.05	0.06	0.00836	7.05	0.06	0.00801	7.05	0.06	0.00442	7.05	0.06	0.00269	7.05	0.06	0.00347
7.1	0.06	0.00835	7.1	0.06	0.00801	7.1	0.06	0.00442	7.1	0.06	0.00269	7.1	0.06	0.00347
7.15	0.06	0.00835	7.15	0.06	0.00801	7.15	0.06	0.00442	7.15	0.06	0.00269	7.15	0.06	0.00347
7.2	0.06	0.00835	7.2	0.06	0.00801	7.2	0.06	0.00442	7.2	0.06	0.00269	7.2	0.06	0.00347
7.25	0.06	0.00835	7.25	0.06	0.00801	7.25	0.06	0.00442	7.25	0.06	0.00269	7.25	0.06	0.00347
7.3	0.06	0.00835	7.3	0.06	0.00801	7.3	0.06	0.00442	7.3	0.06	0.00269	7.3	0.06	0.00347
7.35	0.06	0.00835	7.35	0.06	0.00801	7.35	0.06	0.00442	7.35	0.06	0.00269	7.35	0.06	0.00347
7.4	0.06	0.00835	7.4	0.06	0.00801	7.4	0.06	0.00442	7.4	0.06	0.00269	7.4	0.06	0.00347
7.45	0.06	0.00835	7.45	0.06	0.008	7.45	0.06	0.00442	7.45	0.06	0.00269	7.45	0.06	0.00347
7.5	0.06	0.00835	7.5	0.06	0.008	7.5	0.06	0.00442	7.5	0.06	0.00269	7.5	0.06	0.00347
7.55	0.06	0.00835	7.55	0.06	0.008	7.55	0.06	0.00442	7.55	0.06	0.00269	7.55	0.06	0.00347
7.6	0.06	0.00835	7.6	0.06	0.008	7.6	0.06	0.00442	7.6	0.06	0.00269	7.6	0.06	0.00347
7.65	0.06	0.00835	7.65	0.06	0.008	7.65	0.06	0.00442	7.65	0.06	0.00269	7.65	0.06	0.00347
7.7	0.06	0.00835	7.7	0.06	0.008	7.7	0.06	0.00442	7.7	0.06	0.00269	7.7	0.06	0.00347
7.75	0.06	0.00835	7.75	0.06	0.008	7.75	0.06	0.00442	7.75	0.06	0.00269	7.75	0.06	0.00347
7.8	0.06	0.00835	7.8	0.06	0.008	7.8	0.06	0.00442	7.8	0.06	0.00269	7.8	0.06	0.00347
7.85	0.06	0.00835	7.85	0.06	0.008	7.85	0.06	0.00442	7.85	0.06	0.00269	7.85	0.06	0.00347
7.9	0.06	0.00835	7.9	0.06	0.008	7.9	0.06	0.00442	7.9	0.06	0.00269	7.9	0.06	0.00347
7.95	0.06	0.00835	7.95	0.06	0.008	7.95	0.06	0.00442	7.95	0.06	0.00269	7.95	0.06	0.00347
8	0.06	0.00835	8	0.06	0.008	8	0.06	0.00442	8	0.06	0.00269	8	0.06	0.00347
8.05	0.06	0.00835	8.05	0.06	0.008	8.05	0.06	0.00442	8.05	0.06	0.00269	8.05	0.06	0.00347
8.1	0.06	0.00835	8.1	0.06	0.008	8.1	0.06	0.00442	8.1	0.06	0.00269	8.1	0.06	0.00347
8.15	0.06	0.00835	8.15	0.06	0.008	8.15	0.06	0.00442	8.15	0.06	0.00269	8.15	0.06	0.00347
8.2	0.06	0.00835	8.2	0.06	0.008	8.2	0.06	0.00441	8.2	0.06	0.00269	8.2	0.06	0.00347
8.25	0.06	0.00835	8.25	0.06	0.008	8.25	0.06	0.00441	8.25	0.06	0.00269	8.25	0.06	0.00347
8.3	0.06	0.00834	8.3	0.06	0.008	8.3	0.06	0.00441	8.3	0.06	0.00269	8.3	0.06	0.00347
8.35	0.06	0.00834	8.35	0.06	0.008	8.35	0.06	0.00441	8.35	0.06	0.00269	8.35	0.06	0.00347
8.4	0.06	0.00834	8.4	0.06	0.008	8.4	0.06	0.00441	8.4	0.06	0.00269	8.4	0.06	0.00347
8.45	0.06	0.00834	8.45	0.06	0.008	8.45	0.06	0.00441	8.45	0.06	0.00269	8.45	0.06	0.00347
8.5	0.06	0.00834	8.5	0.06	0.008	8.5	0.06	0.00441	8.5	0.06	0.00269	8.5	0.06	0.00347
8.55	0.06	0.00834	8.55	0.06	0.008	8.55	0.06	0.00441	8.55	0.06	0.00269	8.55	0.06	0.00347
8.6	0.06	0.00834	8.6	0.06	0.008	8.6	0.06	0.00441	8.6	0.06	0.00269	8.6	0.06	0.00347
8.65	0.06	0.00834	8.65	0.06	0.00799	8.65	0.06	0.00441	8.65	0.06	0.00269	8.65	0.06	0.00347
8.7	0.06	0.00834	8.7	0.06	0.00799	8.7	0.06	0.00441	8.7	0.06	0.00269	8.7	0.06	0.00347
8.75	0.06	0.00834	8.75	0.06	0.00799	8.75	0.06	0.00441	8.75	0.06	0.00269	8.75	0.06	0.00347
8.8	0.06	0.00834	8.8	0.06	0.00799	8.8	0.06	0.00441	8.8	0.06	0.00269	8.8	0.06	0.00347
8.85	0.06	0.00834	8.85	0.06	0.00799	8.85	0.06	0.00441	8.85	0.06	0.00269	8.85	0.06	0.00347
8.9	0.06	0.00834	8.9	0.06	0.00799	8.9	0.06	0.00441	8.9	0.06	0.00269	8.9	0.06	0.00347
8.95	0.06	0.00834	8.95	0.06	0.00799	8.95	0.06	0.00441	8.95	0.06	0.00269	8.95	0.06	0.00347
9	0.06	0.00834	9	0.06	0.00799	9	0.06	0.00441	9	0.06	0.00269	9	0.06	0.00347
9.05	0.06	0.00834	9.05	0.06	0.00799	9.05	0.06	0.00441	9.05	0.06	0.00269	9.05	0.06	0.00347
9.1	0.06	0.00834	9.1	0.06	0.00799	9.1	0.06	0.00441	9.1	0.06	0.00269	9.1	0.06	0.00347
9.15	0.06	0.00834	9.15	0.06	0.00799	9.15	0.06	0.00441	9.15	0.06	0.00269	9.15	0.06	0.00347
9.2	0.06	0.00834	9.2	0.06	0.00799	9.2	0.06	0.00441	9.2	0.06	0.00269	9.2	0.06	0.00347
9.25	0.06	0.00834	9.25	0.06	0.00799	9.25	0.06	0.00441	9.25	0.06	0.00269	9.25	0.06	0.00347
9.3	0.06	0.00833	9.3	0.06	0.00799	9.3	0.06	0.00441	9.3	0.06	0.00269	9.3	0.06	0.00347
9.35	0.06	0.00833	9.35	0.06	0.00799	9.35	0.06	0.00441	9.35	0.06	0.00269	9.35	0.06	0.00347
9.4	0.06	0.00833	9.4	0.06	0.00799	9.4	0.06	0.00441	9.4	0.06	0.00269	9.4	0.06	0.00347
9.45	0.06	0.00833	9.45	0.06	0.00799	9.45	0.06	0.00441	9.45	0.06	0.00269	9.45	0.06	0.00347
9.5	0.06	0.00833	9.5	0.06	0.00799	9.5	0.06	0.00441	9.5	0.06	0.00269	9.5	0.06	0.00347
9.55	0.06	0.00833	9.55	0.06	0.00799	9.55	0.06	0.00441	9.55	0.06	0.00269	9.55	0.06	0.00347
9.6	0.06	0.00833	9.6	0.06	0.00799	9.6	0.06	0.00441	9.6	0.06	0.00269	9.6	0.06	0.00347
9.65	0.06	0.00833	9.65	0.06	0.00798	9.65	0.06	0.00441	9.65	0.06	0.00269	9.65	0.06	0.00347
9.7	0.06	0.00833	9.7	0.06	0.00798	9.7	0.06	0.00441	9.7	0.06	0.00269	9.7	0.06	0.00347
9.75	0.06	0.00833	9.75	0.06	0.00798	9.75	0.06	0.00441	9.75	0.06	0.00269	9.75	0.06	0.00347
9.8	0.06	0.00833	9.8	0.06	0.00798	9.8	0.06	0.00441	9.8	0.06	0.00269	9.8	0.06	0.00347
9.85	0.06	0.00833	9.85	0.06	0.00798	9.85	0.06	0.00441	9.85	0.06	0.00269	9.85	0.06	0.00347
9.9	0.06	0.00833	9.9	0.06	0.00798	9.9	0.06	0.00441	9.9	0.06	0.00269	9.9	0.06	0.00347
9.95	0.06	0.00833	9.95	0.06	0.00798	9.95	0.06	0.00441	9.95	0.06	0.00269	9.95	0.06	0.00347
10	0.06	0.00833	10	0.06	0.00798	10	0.06	0.00441	10	0.06	0.00269	10	0.06	0.00347
10.05	0.06	0.00833	10.05	0.06	0.00798	10.05	0.06	0.00441	10.05	0.06	0.00269	10.05	0.06	0.00347
10.1	0.06	0.00833	10.1	0.06	0.00798	10.1	0.06	0.00441	10.1	0.06	0.00269	10.1	0.06	0.00347
10.15	0.06	0.00833	10.15	0.06	0.00798	10.15	0.06	0.00441	10.15	0.06	0.00269	10.15	0.06	0.00347
10.2	0.06	0.00832	10.2	0.06	0.00798	10.2	0.06	0.00441	10.2	0.06	0.00269	10.2	0.06	0.00347
10.25	0.06	0.00832	10.25	0.06	0.00798	10.25	0.06	0.00441	10.25	0.06	0.00269	10.25	0.06	0.00347
10.3	0.06	0.00832	10.3	0.06	0.00798	10.3	0.06	0.00441	10.3	0.06	0.00269	10.3	0.06	0.00347
10.35	0.06	0.00832	10.35	0.06	0.00798	10.35	0.06	0.00441	10.35	0.06	0.00269	10.35	0.06	0.00347
10.4	0.06	0.00832	10.4	0.06	0.00798	10.4	0.06	0.00441	10.4	0.06	0.00269	10.4	0.06	0.00347
10.45	0.06	0.00832	10.45	0.06	0.00798	10.45	0.06	0.00441	10.45	0.06	0.00269	10.45	0.06	0.00347
10.5	0.06	0.00832	10.5	0.06	0.00798	10.5	0.06	0.00441	10.5	0.06	0.00269	10.5	0.06	0.00347
10.55	0.06	0.00832	10.55	0.06	0.00798	10.55	0.06	0.00441	10.55	0.06	0.00269	10.55	0.06	0.00347
10.6	0.06	0.00832	10.6	0.06	0.00797	10.6	0.06	0.00441	10.6	0.06	0.00269	10.6	0.06	0.00347
10.65	0.06	0.00832	10.65	0.06	0.00797	10.65	0.06	0.00441	10.65	0.06	0.00269	10.65	0.06	0.00347
10.7	0.06	0.00832	10.7	0.06	0.00797	10.7	0.06	0.00441	10.7	0.06	0.00269	10.7	0.06	0.00347
10.75	0.06	0.00832	10.75	0.06	0.00797	10.75	0.06	0.00441	10.75	0.06	0.00269	10.75	0.06	0.00347
10.8	0.06	0.00832	10.8	0.06	0.00797	10.8	0.06	0.00441	10.8	0.06	0.00269	10.8	0.06	0.00347
10.85	0.06	0.00832	10.85	0.06	0.00797	10.85	0.06	0.00441	10.85	0.06	0.00269	10.85	0.06	0.00347
10.9	0.06	0.00832	10.9	0.06	0.00797	10.9	0.06	0.00441	10.9	0.06	0.00269	10.9	0.06	0.00347
10.95	0.06	0.00832	10.95	0.06	0.00797	10.95	0.06	0.00441	10.95	0.06	0.00269	10.95	0.06	0.00347
11	0.06	0.00832	11	0.06	0.00797	11	0.06	0.00441	11	0.06	0.00269	11	0.06	0.00347
11.05	0.06	0.00831	11.05	0.06	0.00797	11.05	0.06	0.00441	11.05	0.06	0.00269	11.05	0.06	0.00347
11.1	0.06	0.00831	11.1	0.06	0.00797	11.1	0.06	0.00441	11.1	0.06	0.00269	11.1	0.06	0.00347
11.15	0.06	0.00831	11.15	0.06	0.00797	11.15	0.06	0.00441	11.15	0.06	0.00269	11.15	0.06	0.00347
11.2	0.06	0.00831	11.2	0.06	0.00797	11.2	0.06	0.00441	11.2	0.06	0.00269	11.2	0.06	0.00347
11.25	0.06	0.00831	11.25	0.06	0.00797	11.25	0.06	0.00441	11.25	0.06	0.00269	11.25	0.06	0.00347
11.3	0.06	0.00831	11.3	0.06	0.00797	11.3	0.06	0.00441	11.3	0.06	0.00269	11.3	0.06	0.00347
11.35	0.06	0.00831	11.35	0.06	0.00797	11.35	0.06	0.00441	11.35	0.06	0.00269	11.35	0.06	0.00347
11.4	0.06	0.00831	11.4	0.06	0.00796	11.4	0.06	0.00441	11.4	0.06	0.00269	11.4	0.06	0.00347
11.45	0.06	0.00831	11.45	0.06	0.00796	11.45	0.06	0.00441	11.45	0.06	0.00269	11.45	0.06	0.00347
11.5	0.06	0.00831	11.5	0.06	0.00796	11.5	0.06	0.00441	11.5	0.06	0.00269	11.5	0.06	0.00347
11.55	0.06	0.00831	11.55	0.06	0.00796	11.55	0.06	0.00441	11.55	0.06	0.00269	11.55	0.06	0.00347
11.6	0.06	0.00831	11.6	0.06	0.00796	11.6	0.06	0.00441	11.6	0.06	0.00269	11.6	0.06	0.00347
11.65	0.06	0.00831	11.65	0.06	0.00796	11.65	0.06	0.00441	11.65	0.06	0.00269	11.65	0.06	0.00347
11.7	0.06	0.00831	11.7	0.06	0.00796	11.7	0.06	0.00441	11.7	0.06	0.00269	11.7	0.06	0.00347
11.75	0.06	0.00831	11.75	0.06	0.00796	11.75	0.06	0.00441	11.75	0.06	0.00269	11.75	0.06	0.00347
11.8	0.06	0.0083	11.8	0.06	0.00796	11.8	0.06	0.00441	11.8	0.06	0.00269	11.8	0.06	0.00347
11.85	0.06	0.0083	11.85	0.06	0.00796	11.85	0.06	0.00441	11.85	0.06	0.00269	11.85	0.06	0.00347
11.9	0.06	0.0083	11.9	0.06	0.00796	11.9	0.06	0.00441	11.9	0.06	0.00269	11.9	0.06	0.00347
11.95	0.06	0.0083	11.95	0.06	0.00796	11.95	0.06	0.00441	11.95	0.06	0.00269	11.95	0.06	0.00347
12	0.06	0.0083	12	0.06	0.00796	12	0.06	0.00441	12	0.06	0.00269	12	0.06	0.00347
12.05	0.06	0.0083	12.05	0.06	0.00796	12.05	0.06	0.00441	12.05	0.06	0.00269	12.05	0.06	0.00347
12.1	0.06	0.0083	12.1	0.06	0.00796	12.1	0.06	0.00441	12.1	0.06	0.00269	12.1	0.06	0.00347
12.15	0.06	0.0083	12.15	0.06	0.00796	12.15	0.06	0.00441	12.15	0.06	0.00269	12.15	0.06	0.00347
12.2	0.06	0.0083	12.2	0.06	0.00795	12.2	0.06	0.00441	12.2	0.06	0.00269	12.2	0.06	0.00347
12.25	0.06	0.0083	12.25	0.06	0.00795	12.25	0.06	0.00441	12.25	0.06	0.00269	12.25	0.06	0.00347
12.3	0.06	0.0083	12.3	0.06	0.00795	12.3	0.06	0.00441	12.3	0.06	0.00269	12.3	0.06	0.00347
12.35	0.06	0.0083	12.35	0.06	0.00795	12.35	0.06	0.00441	12.35	0.06	0.00269	12.35	0.06	0.00347
12.4	0.06	0.0083	12.4	0.06	0.00795	12.4	0.06	0.00441	12.4	0.06	0.00269	12.4	0.06	0.00347
12.45	0.06	0.0083	12.45	0.06	0.00795	12.45	0.06	0.00441	12.45	0.06	0.00269	12.45	0.06	0.00347
12.5	0.06	0.00829	12.5	0.06	0.00795	12.5	0.06	0.00441	12.5	0.06	0.00269	12.5	0.06	0.00347
12.55	0.06	0.00829	12.55	0.06	0.00795	12.55	0.06	0.00441	12.55	0.06	0.00269	12.55	0.06	0.00347
12.6	0.06	0.00829	12.6	0.06	0.00795	12.6	0.06	0.00441	12.6	0.06	0.00269	12.6	0.06	0.00347
12.65	0.06	0.00829	12.65	0.06	0.00795	12.65	0.06	0.00441	12.65	0.06	0.00269	12.65	0.06	0.00347
12.7	0.06	0.00829	12.7	0.06	0.00795	12.7	0.06	0.00441	12.7	0.06	0.00269	12.7	0.06	0.00347
12.75	0.06	0.00829	12.75	0.06	0.00795	12.75	0.06	0.00441	12.75	0.06	0.00269	12.75	0.06	0.00347
12.8	0.06	0.00829	12.8	0.06	0.00795	12.8	0.06	0.00441	12.8	0.06	0.00269	12.8	0.06	0.00347
12.85	0.06	0.00829	12.85	0.06	0.00795	12.85	0.06	0.00441	12.85	0.06	0.00269	12.85	0.06	0.00347
12.9	0.06	0.00829	12.9	0.06	0.00795	12.9	0.06	0.00441	12.9	0.06	0.00269	12.9	0.06	0.00347
12.95	0.06	0.00829	12.95	0.06	0.00794	12.95	0.06	0.00441	12.95	0.06	0.00269	12.95	0.06	0.00347
13	0.06	0.00829	13	0.06	0.00794	13	0.06	0.00441	13	0.06	0.00269	13	0.06	0.00347
13.05	0.06	0.00829	13.05	0.06	0.00794	13.05	0.06	0.0044	13.05	0.06	0.00269	13.05	0.06	0.00347
13.1	0.06	0.00829	13.1	0.06	0.00794	13.1	0.06	0.0044	13.1	0.06	0.00269	13.1	0.06	0.00347
13.15	0.06	0.00829	13.15	0.06	0.00794	13.15	0.06	0.0044	13.15	0.06	0.00269	13.15	0.06	0.00346
13.2	0.06	0.00828	13.2	0.06	0.00794	13.2	0.06	0.0044	13.2	0.06	0.00269	13.2	0.06	0.00346
13.25	0.06	0.00828	13.25	0.06	0.00794	13.25	0.06	0.0044	13.25	0.06	0.00269	13.25	0.06	0.00346
13.3	0.06	0.00828	13.3	0.06	0.00794	13.3	0.06	0.0044	13.3	0.06	0.00269	13.3	0.06	0.00346
13.35	0.06	0.00828	13.35	0.06	0.00794	13.35	0.06	0.0044	13.35	0.06	0.00269	13.35	0.06	0.00346
13.4	0.06	0.00828	13.4	0.06	0.00794	13.4	0.06	0.0044	13.4	0.06	0.00269	13.4	0.06	0.00346
13.45	0.06	0.00828	13.45	0.06	0.00794	13.45	0.06	0.0044	13.45	0.06	0.00269	13.45	0.06	0.00346
13.5	0.06	0.00828	13.5	0.06	0.00794	13.5	0.06	0.0044	13.5	0.06	0.00269	13.5	0.06	0.00346
13.55	0.06	0.00828	13.55	0.06	0.00794	13.55	0.06	0.0044	13.55	0.06	0.00269	13.55	0.06	0.00346
13.6	0.06	0.00828	13.6	0.06	0.00794	13.6	0.06	0.0044	13.6	0.06	0.00269	13.6	0.06	0.00346
13.65	0.06	0.00828	13.65	0.06	0.00793	13.65	0.06	0.0044	13.65	0.06	0.00269	13.65	0.06	0.00346
13.7	0.06	0.00828	13.7	0.06	0.00793	13.7	0.06	0.0044	13.7	0.06	0.00269	13.7	0.06	0.00346
13.75	0.06	0.00828	13.75	0.06	0.00793	13.75	0.06	0.0044	13.75	0.06	0.00269	13.75	0.06	0.00346
13.8	0.06	0.00828	13.8	0.06	0.00793	13.8	0.06	0.0044	13.8	0.06	0.00269	13.8	0.06	0.00346
13.85	0.06	0.00827	13.85	0.06	0.00793	13.85	0.06	0.0044	13.85	0.06	0.00269	13.85	0.06	0.00346
13.9	0.06	0.00827	13.9	0.06	0.00793	13.9	0.06	0.0044	13.9	0.06	0.00269	13.9	0.06	0.00346
13.95	0.06	0.00827	13.95	0.06	0.00793	13.95	0.06	0.0044	13.95	0.06	0.00269	13.95	0.06	0.00346
14	0.06	0.00827	14	0.06	0.00793	14	0.06	0.0044	14	0.06	0.00269	14	0.06	0.00346
14.05	0.06	0.00827	14.05	0.06	0.00793	14.05	0.06	0.0044	14.05	0.06	0.00269	14.05	0.06	0.00346
14.1	0.06	0.00827	14.1	0.06	0.00793	14.1	0.06	0.0044	14.1	0.06	0.00269	14.1	0.06	0.00346
14.15	0.06	0.00827	14.15	0.06	0.00793	14.15	0.06	0.0044	14.15	0.06	0.00269	14.15	0.06	0.00346
14.2	0.06	0.00827	14.2	0.06	0.00793	14.2	0.06	0.0044	14.2	0.06	0.00269	14.2	0.06	0.00346
14.25	0.06	0.00827	14.25	0.06	0.00793	14.25	0.06	0.0044	14.25	0.06	0.00269	14.25	0.06	0.00346
14.3	0.06	0.00827	14.3	0.06	0.00792	14.3	0.06	0.0044	14.3	0.06	0.00269	14.3	0.06	0.00346
14.35	0.06	0.00827	14.35	0.06	0.00792	14.35	0.06	0.0044	14.35	0.06	0.00269	14.35	0.06	0.00346
14.4	0.06	0.00827	14.4	0.06	0.00792	14.4	0.06	0.0044	14.4	0.06	0.00269	14.4	0.06	0.00346
14.45	0.06	0.00826	14.45	0.06	0.00792	14.45	0.06	0.0044	14.45	0.06	0.00269	14.45	0.06	0.00346
14.5	0.06	0.00826	14.5	0.06	0.00792	14.5	0.06	0.0044	14.5	0.06	0.00269	14.5	0.06	0.00346
14.55	0.06	0.00826	14.55	0.06	0.00792	14.55	0.06	0.0044	14.55	0.06	0.00269	14.55	0.06	0.00346
14.6	0.06	0.00826	14.6	0.06	0.00792	14.6	0.06	0.0044	14.6	0.06	0.00269	14.6	0.06	0.00346
14.65	0.06	0.00826	14.65	0.06	0.00792	14.65	0.06	0.0044	14.65	0.06	0.00269	14.65	0.06	0.00346
14.7	0.06	0.00826	14.7	0.06	0.00792	14.7	0.06	0.0044	14.7	0.06	0.00269	14.7	0.06	0.00346
14.75	0.06	0.00826	14.75	0.06	0.00792	14.75	0.06	0.0044	14.75	0.06	0.00269	14.75	0.06	0.00346
14.8	0.06	0.00826	14.8	0.06	0.00792	14.8	0.06	0.0044	14.8	0.06	0.00269	14.8	0.06	0.00346
14.85	0.06	0.00826	14.85	0.06	0.00792	14.85	0.06	0.0044	14.85	0.06	0.00269	14.85	0.06	0.00346
14.9	0.06	0.00826	14.9	0.06	0.00791	14.9	0.06	0.0044	14.9	0.06	0.00269	14.9	0.06	0.00346
14.95	0.06	0.00826	14.95	0.06	0.00791	14.95	0.06	0.0044	14.95	0.06	0.00269	14.95	0.06	0.00346
15	0.06	0.00826	15	0.06	0.00791	15	0.06	0.0044	15	0.06	0.00269	15	0.06	0.00346
15.05	0.06	0.00825	15.05	0.06	0.00791	15.05	0.06	0.0044	15.05	0.06	0.00269	15.05	0.06	0.00346
15.1	0.06	0.00825	15.1	0.06	0.00791	15.1	0.06	0.0044	15.1	0.06	0.00269	15.1	0.06	0.00346
15.15	0.06	0.00825	15.15	0.06	0.00791	15.15	0.06	0.0044	15.15	0.06	0.00269	15.15	0.06	0.00346
15.2	0.06	0.00825	15.2	0.06	0.00791	15.2	0.06	0.0044	15.2	0.06	0.00269	15.2	0.06	0.00346
15.25	0.06	0.00825	15.25	0.06	0.00791	15.25	0.06	0.0044	15.25	0.06	0.00269	15.25	0.06	0.00346
15.3	0.06	0.00825	15.3	0.06	0.00791	15.3	0.06	0.0044	15.3	0.06	0.00269	15.3	0.06	0.00346
15.35	0.06	0.00825	15.35	0.06	0.00791	15.35	0.06	0.0044	15.35	0.06	0.00269	15.35	0.06	0.00346
15.4	0.06	0.00825	15.4	0.06	0.00791	15.4	0.06	0.00439	15.4	0.06	0.00269	15.4	0.06	0.00346
15.45	0.06	0.00825	15.45	0.06	0.00791	15.45	0.06	0.00439	15.45	0.06	0.00269	15.45	0.06	0.00346
15.5	0.06	0.00825	15.5	0.06	0.0079	15.5	0.06	0.00439	15.5	0.06	0.00269	15.5	0.06	0.00346
15.55	0.06	0.00825	15.55	0.06	0.0079	15.55	0.06	0.00439	15.55	0.06	0.00269	15.55	0.06	0.00346
15.6	0.06	0.00824	15.6	0.06	0.0079	15.6	0.06	0.00439	15.6	0.06	0.00269	15.6	0.06	0.00346
15.65	0.06	0.00824	15.65	0.06	0.0079	15.65	0.06	0.00439	15.65	0.06	0.00269	15.65	0.06	0.00346
15.7	0.06	0.00824	15.7	0.06	0.0079	15.7	0.06	0.00439	15.7	0.06	0.00269	15.7	0.06	0.00346
15.75	0.06	0.00824	15.75	0.06	0.0079	15.75	0.06	0.00439	15.75	0.06	0.00269	15.75	0.06	0.00346
15.8	0.06	0.00824	15.8	0.06	0.0079	15.8	0.06	0.00439	15.8	0.06	0.00269	15.8	0.06	0.00346
15.85	0.06	0.00824	15.85	0.06	0.0079	15.85	0.06	0.00439	15.85	0.06	0.00268	15.85	0.06	0.00346
15.9	0.06	0.00824	15.9	0.06	0.0079	15.9	0.06	0.00439	15.9	0.06	0.00268	15.9	0.06	0.00346
15.95	0.06	0.00824	15.95	0.06	0.0079	15.95	0.06	0.00439	15.95	0.06	0.00268	15.95	0.06	0.00346
16	0.06	0.00824	16	0.06	0.0079	16	0.06	0.00439	16	0.06	0.00268	16	0.06	0.00346
16.05	0.06	0.00824	16.05	0.06	0.0079	16.05	0.06	0.00439	16.05	0.06	0.00268	16.05	0.06	0.00346
16.1	0.06	0.00823	16.1	0.06	0.0079	16.1	0.06	0.00439	16.1	0.06	0.00268	16.1	0.06	0.00346
16.15	0.06	0.0082	16.15	0.06	0.00789	16.15	0.06	0.00439	16.15	0.06	0.00268	16.15	0.06	0.00346
16.2	0.06	0.00814	16.2	0.06	0.00788	16.2	0.06	0.00439	16.2	0.06	0.00268	16.2	0.06	0.00345
16.25	0.06	0.00804	16.25	0.06	0.00784	16.25	0.06	0.00438	16.25	0.06	0.00268	16.25	0.06	0.00345
16.3	0.06	0.00789	16.3	0.06	0.00777	16.3	0.06	0.00437	16.3	0.06	0.00267	16.3	0.06	0.00344
16.35	0.06	0.00768	16.35	0.06	0.00763	16.35	0.06	0.00434	16.35	0.06	0.00266	16.35	0.06	0.00342
16.4	0.06	0.00741	16.4	0.06	0.00746	16.4	0.06	0.00429	16.4	0.06	0.00265	16.4	0.06	0.00339
16.45	0.06	0.00708	16.45	0.06	0.00724	16.45	0.06	0.00421	16.45	0.06	0.00262	16.45	0.06	0.00334
16.5	0.06	0.00667	16.5	0.06	0.00698	16.5	0.06	0.0041	16.5	0.06	0.00258	16.5	0.06	0.00327
16.55	0.06	0.0062	16.55	0.06	0.00667	16.55	0.06	0.00394	16.55	0.06	0.00254	16.55	0.06	0.00317
16.6	0.06	0.0053	16.6	0.06	0.00608	16.6	0.06	0.00363	16.6	0.06	0.00244	16.6	0.06	0.00297
16.65	0.06	0.00443	16.65	0.06	0.0055	16.65	0.06	0.00334	16.65	0.06	0.00236	16.65	0.06	0.0028
16.7	0.06	0.00359	16.7	0.06	0.00494	16.7	0.06	0.00312	16.7	0.06	0.0023	16.7	0.06	0.00269
16.75	0.06	0.0028	16.75	0.06	0.00439	16.75	0.06	0.00301	16.75	0.06	0.00228	16.75	0.06	0.00266
16.8	0.06	0.00205	16.8	0.06	0.00385	16.8	0.06	0.00306	16.8	0.06	0.0023	16.8	0.06	0.00273
16.85	0.06	0.00135	16.85	0.06	0.00333	16.85	0.06	0.00327	16.85	0.06	0.00236	16.85	0.06	0.00291
16.9	0.06	0.00071	16.9	0.06	0.00283	16.9	0.06	0.00362	16.9	0.06	0.00247	16.9	0.06	0.00318
16.95	0.06	0.000154	16.95	0.06	0.00234	16.95	0.06	0.00407	16.95	0.06	0.00259	16.95	0.06	0.00351
17	0.06	0.000423	17	0.06	0.00187	17	0.06	0.00457	17	0.06	0.00274	17	0.06	0.00387
17.05	0.06	0.000873	17.05	0.06	0.00142	17.05	0.06	0.00508	17.05	0.06	0.00288	17.05	0.06	0.00423
17.1	0.06	0.00125	17.1	0.06	0.000992	17.1	0.06	0.00559	17.1	0.06	0.003	17.1	0.06	0.00458
17.15	0.06	0.00156	17.15	0.06	0.000588	17.15	0.06	0.00606	17.15	0.06	0.00311	17.15	0.06	0.00489
17.2	0.06	0.00179	17.2	0.06	0.00023	17.2	0.06	0.00646	17.2	0.06	0.00318	17.2	0.06	0.00514
17.25	0.06	0.00194	17.25	0.06	0.000219	17.25	0.06	0.00678	17.25	0.06	0.0032	17.25	0.06	0.00532
17.3	0.06	0.00203	17.3	0.06	0.000529	17.3	0.06	0.007	17.3	0.06	0.00318	17.3	0.06	0.00543
17.35	0.06	0.00205	17.35	0.06	0.000831	17.35	0.06	0.00708	17.35	0.06	0.00312	17.35	0.06	0.00545
17.4	0.06	0.00202	17.4	0.06	0.00111	17.4	0.06	0.00704	17.4	0.06	0.00302	17.4	0.06	0.00537
17.45	0.06	0.00192	17.45	0.06	0.00135	17.45	0.06	0.00685	17.45	0.06	0.00289	17.45	0.06	0.00521
17.5	0.06	0.00178	17.5	0.06	0.00156	17.5	0.06	0.00653	17.5	0.06	0.00275	17.5	0.06	0.00495
17.55	0.06	0.00161	17.55	0.06	0.00172	17.55	0.06	0.0061	17.55	0.06	0.0026	17.55	0.06	0.00459
17.6	0.06	0.00141	17.6	0.06	0.00184	17.6	0.06	0.00556	17.6	0.06	0.00249	17.6	0.06	0.00416
17.65	0.06	0.00119	17.65	0.06	0.00192	17.65	0.06	0.00497	17.65	0.06	0.00243	17.65	0.06	0.00369
17.7	0.06	0.000974	17.7	0.06	0.00197	17.7	0.06	0.00439	17.7	0.06	0.00245	17.7	0.06	0.00327
17.75	0.06	0.000758	17.75	0.06	0.00198	17.75	0.06	0.00389	17.75	0.06	0.00257	17.75	0.06	0.00303
17.8	0.06	0.000553	17.8	0.06	0.00196	17.8	0.06	0.00357	17.8	0.06	0.00278	17.8	0.06	0.0031
17.85	0.06	0.000366	17.85	0.06	0.00193	17.85	0.06	0.00352	17.85	0.06	0.00307	17.85	0.06	0.00351
17.9	0.06	0.0002	17.9	0.06	0.0019	17.9	0.06	0.00376	17.9	0.06	0.00342	17.9	0.06	0.00415
17.95	0.06	6.1e-05	17.95	0.06	0.00185	17.95	0.06	0.00426	17.95	0.06	0.00379	17.95	0.06	0.00489
18	0.06	0.000106	18	0.06	0.0018	18	0.06	0.00494	18	0.06	0.00416	18	0.06	0.00562
18.05	0.06	0.000225	18.05	0.06	0.00172	18.05	0.06	0.00575	18.05	0.06	0.00453	18.05	0.06	0.00626
18.1	0.06	0.00034	18.1	0.06	0.00161	18.1	0.06	0.00664	18.1	0.06	0.00489	18.1	0.06	0.00681
18.15	0.06	0.000452	18.15	0.06	0.00145	18.15	0.06	0.00755	18.15	0.06	0.00523	18.15	0.06	0.00722
18.2	0.06	0.000561	18.2	0.06	0.00124	18.2	0.06	0.00843	18.2	0.06	0.00553	18.2	0.06	0.00746
18.25	0.06	0.000665	18.25	0.06	0.000986	18.25	0.06	0.00921	18.25	0.06	0.00577	18.25	0.06	0.00756
18.3	0.06	0.000759	18.3	0.06	0.00069	18.3	0.06	0.00986	18.3	0.06	0.00596	18.3	0.06	0.00756
18.35	0.06	0.000837	18.35	0.06	0.000363	18.35	0.06	0.01035	18.35	0.06	0.0061	18.35	0.06	0.00748
18.4	0.06	0.000898	18.4	0.06	6.3e-05	18.4	0.06	0.01063	18.4	0.06	0.00615	18.4	0.06	0.00733
18.45	0.06	0.000934	18.45	0.06	0.000333	18.45	0.06	0.01066	18.45	0.06	0.0061	18.45	0.06	0.00715
18.5	0.06	0.000941	18.5	0.06	0.000654	18.5	0.06	0.01045	18.5	0.06	0.00596	18.5	0.06	0.00697
18.55	0.06	0.000924	18.55	0.06	0.000937	18.55	0.06	0.01007	18.55	0.06	0.00574	18.55	0.06	0.00679
18.6	0.06	0.000882	18.6	0.06	0.00118	18.6	0.06	0.00955	18.6	0.06	0.0054	18.6	0.06	0.00662
18.65	0.06	0.000815	18.65	0.06	0.00137	18.65	0.06	0.00892	18.65	0.06	0.00497	18.65	0.06	0.00644
18.7	0.06	0.000723	18.7	0.06	0.0015	18.7	0.06	0.00826	18.7	0.06	0.00445	18.7	0.06	0.00624
18.75	0.06	0.000604	18.75	0.06	0.00158	18.75	0.06	0.00761	18.75	0.06	0.00387	18.75	0.06	0.006
18.8	0.06	0.000461	18.8	0.06	0.0016	18.8	0.06	0.00701	18.8	0.06	0.00324	18.8	0.06	0.00566
18.85	0.06	0.000295	18.85	0.06	0.00157	18.85	0.06	0.00645	18.85	0.06	0.00264	18.85	0.06	0.0052
18.9	0.06	0.000114	18.9	0.06	0.0015	18.9	0.06	0.0059	18.9	0.06	0.00214	18.9	0.06	0.00464
18.95	0.06	7.9e-05	18.95	0.06	0.0014	18.95	0.06	0.00537	18.95	0.06	0.00188	18.95	0.06	0.00397
19	0.06	0.000247	19	0.06	0.00128	19	0.06	0.00481	19	0.06	0.00194	19	0.06	0.00324
19.05	0.06	0.000389	19.05	0.06	0.00113	19.05	0.06	0.00419	19.05	0.06	0.00225	19.05	0.06	0.00258
19.1	0.06	0.000484	19.1	0.06	0.000985	19.1	0.06	0.00354	19.1	0.06	0.00265	19.1	0.06	0.00223
19.15	0.06	0.000532	19.15	0.06	0.000841	19.15	0.06	0.00291	19.15	0.06	0.00304	19.15	0.06	0.00244
19.2	0.06	0.000538	19.2	0.06	0.000703	19.2	0.06	0.00252	19.2	0.06	0.00336	19.2	0.06	0.00308
19.25	0.06	0.000506	19.25	0.06	0.000575	19.25	0.06	0.00268	19.25	0.06	0.00356	19.25	0.06	0.0039
19.3	0.06	0.00045	19.3	0.06	0.00046	19.3	0.06	0.00341	19.3	0.06	0.00365	19.3	0.06	0.0047
19.35	0.06	0.000384	19.35	0.06	0.000356	19.35	0.06	0.00444	19.35	0.06	0.00363	19.35	0.06	0.00538
19.4	0.06	0.000316	19.4	0.06	0.000265	19.4	0.06	0.00555	19.4	0.06	0.0035	19.4	0.06	0.0059
19.45	0.06	0.000252	19.45	0.06	0.000184	19.45	0.06	0.00662	19.45	0.06	0.00328	19.45	0.06	0.00617
19.5	0.06	0.000198	19.5	0.06	0.000111	19.5	0.06	0.00754	19.5	0.06	0.00302	19.5	0.06	0.0062
19.55	0.06	0.000156	19.55	0.06	6.2e-05	19.55	0.06	0.00824	19.55	0.06	0.00275	19.55	0.06	0.006
19.6	0.06	0.00013	19.6	0.06	9.7e-05	19.6	0.06	0.00871	19.6	0.06	0.0025	19.6	0.06	0.00559
19.65	0.06	0.000117	19.65	0.06	0.000183	19.65	0.06	0.00882	19.65	0.06	0.0023	19.65	0.06	0.00502
19.7	0.06	0.000114	19.7	0.06	0.00029	19.7	0.06	0.00859	19.7	0.06	0.00216	19.7	0.06	0.00436
19.75	0.06	0.000115	19.75	0.06	0.000408	19.75	0.06	0.00804	19.75	0.06	0.00208	19.75	0.06	0.00369
19.8	0.06	0.000113	19.8	0.06	0.00053	19.8	0.06	0.00724	19.8	0.06	0.00205	19.8	0.06	0.00311
19.85	0.06	0.000104	19.85	0.06	0.000648	19.85	0.06	0.00628	19.85	0.06	0.00205	19.85	0.06	0.00271
19.9	0.06	8.3e-05	19.9	0.06	0.000757	19.9	0.06	0.00526	19.9	0.06	0.00208	19.9	0.06	0.00256
19.95	0.06	4.9e-05	19.95	0.06	0.000854	19.95	0.06	0.00428	19.95	0.06	0.00211	19.95	0.06	0.00262
20	0.06	8e-06	20	0.06	0.00094	20	0.06	0.0035	20	0.06	0.00215	20	0.06	0.00275
20.05	0.06	5e-05	20.05	0.06	0.00101	20.05	0.06	0.00307	20.05	0.06	0.00219	20.05	0.06	0.00288
20.1	0.06	0.000105	20.1	0.06	0.00107	20.1	0.06	0.00305	20.1	0.06	0.00223	20.1	0.06	0.00292
20.15	0.06	0.000157	20.15	0.06	0.0011	20.15	0.06	0.00328	20.15	0.06	0.00227	20.15	0.06	0.00288
20.2	0.06	0.000199	20.2	0.06	0.0011	20.2	0.06	0.00357	20.2	0.06	0.00234	20.2	0.06	0.00283
20.25	0.06	0.000222	20.25	0.06	0.00107	20.25	0.06	0.00379	20.25	0.06	0.00244	20.25	0.06	0.0028
20.3	0.06	0.000218	20.3	0.06	0.00101	20.3	0.06	0.00389	20.3	0.06	0.00258	20.3	0.06	0.00283
20.35	0.06	0.000183	20.35	0.06	0.000911	20.35	0.06	0.00393	20.35	0.06	0.00279	20.35	0.06	0.00292
20.4	0.06	0.000117	20.4	0.06	0.000788	20.4	0.06	0.00399	20.4	0.06	0.00308	20.4	0.06	0.00311
20.45	0.06	3.1e-05	20.45	0.06	0.00065	20.45	0.06	0.00413	20.45	0.06	0.00345	20.45	0.06	0.00341
20.5	0.06	5.6e-05	20.5	0.06	0.000505	20.5	0.06	0.00437	20.5	0.06	0.00388	20.5	0.06	0.0038
20.55	0.06	0.000126	20.55	0.06	0.00036	20.55	0.06	0.00473	20.55	0.06	0.00435	20.55	0.06	0.00427
20.6	0.06	0.000169	20.6	0.06	0.000218	20.6	0.06	0.0052	20.6	0.06	0.00481	20.6	0.06	0.00479
20.65	0.06	0.000181	20.65	0.06	8.3e-05	20.65	0.06	0.00576	20.65	0.06	0.00526	20.65	0.06	0.00534
20.7	0.06	0.000163	20.7	0.06	5.9e-05	20.7	0.06	0.00636	20.7	0.06	0.00566	20.7	0.06	0.00588
20.75	0.06	0.000122	20.75	0.06	0.000181	20.75	0.06	0.00697	20.75	0.06	0.006	20.75	0.06	0.00639
20.8	0.06	6.8e-05	20.8	0.06	0.000299	20.8	0.06	0.00759	20.8	0.06	0.00626	20.8	0.06	0.00685
20.85	0.06	1.3e-05	20.85	0.06	0.000412	20.85	0.06	0.00817	20.85	0.06	0.00642	20.85	0.06	0.00725
20.9	0.06	4e-05	20.9	0.06	0.000513	20.9	0.06	0.00869	20.9	0.06	0.00648	20.9	0.06	0.00759
20.95	0.06	8.1e-05	20.95	0.06	0.000597	20.95	0.06	0.00914	20.95	0.06	0.00641	20.95	0.06	0.00784
21	0.06	0.000114	21	0.06	0.000662	21	0.06	0.0095	21	0.06	0.00621	21	0.06	0.00799
21.05	0.06	0.00014	21.05	0.06	0.000704	21.05	0.06	0.00977	21.05	0.06	0.00589	21.05	0.06	0.008
21.1	0.06	0.000162	21.1	0.06	0.000728	21.1	0.06	0.00991	21.1	0.06	0.00546	21.1	0.06	0.00786
21.15	0.06	0.000181	21.15	0.06	0.000736	21.15	0.06	0.00991	21.15	0.06	0.00494	21.15	0.06	0.00751
21.2	0.06	0.000196	21.2	0.06	0.000727	21.2	0.06	0.00976	21.2	0.06	0.00437	21.2	0.06	0.00693
21.25	0.06	0.000205	21.25	0.06	0.000704	21.25	0.06	0.00941	21.25	0.06	0.00377	21.25	0.06	0.00615
21.3	0.06	0.000206	21.3	0.06	0.000667	21.3	0.06	0.00881	21.3	0.06	0.00316	21.3	0.06	0.00524
21.35	0.06	0.000195	21.35	0.06	0.000619	21.35	0.06	0.008	21.35	0.06	0.00259	21.35	0.06	0.00426
21.4	0.06	0.000165	21.4	0.06	0.000561	21.4	0.06	0.00698	21.4	0.06	0.00213	21.4	0.06	0.00329
21.45	0.06	0.000113	21.45	0.06	0.000497	21.45	0.06	0.00583	21.45	0.06	0.00181	21.45	0.06	0.00247
21.5	0.06	4.4e-05	21.5	0.06	0.00043	21.5	0.06	0.00465	21.5	0.06	0.00163	21.5	0.06	0.00195
21.55	0.06	3.5e-05	21.55	0.06	0.000362	21.55	0.06	0.00353	21.55	0.06	0.00154	21.55	0.06	0.00179
21.6	0.06	0.000113	21.6	0.06	0.000292	21.6	0.06	0.00264	21.6	0.06	0.00151	21.6	0.06	0.00184
21.65	0.06	0.000182	21.65	0.06	0.000222	21.65	0.06	0.00212	21.65	0.06	0.00151	21.65	0.06	0.00187
21.7	0.06	0.000238	21.7	0.06	0.000154	21.7	0.06	0.00198	21.7	0.06	0.00152	21.7	0.06	0.00184
21.75	0.06	0.000278	21.75	0.06	8.9e-05	21.75	0.06	0.00203	21.75	0.06	0.00154	21.75	0.06	0.00181
21.8	0.06	0.000297	21.8	0.06	3.8e-05	21.8	0.06	0.00205	21.8	0.06	0.00157	21.8	0.06	0.0018
21.85	0.06	0.000288	21.85	0.06	6.3e-05	21.85	0.06	0.00203	21.85	0.06	0.00157	21.85	0.06	0.00183
21.9	0.06	0.000254	21.9	0.06	0.000124	21.9	0.06	0.00201	21.9	0.06	0.00156	21.9	0.06	0.00188
21.95	0.06	0.000201	21.95	0.06	0.000187	21.95	0.06	0.002	21.95	0.06	0.00152	21.95	0.06	0.00192
22	0.06	0.000141	22	0.06	0.000249	22	0.06	0.00199	22	0.06	0.00146	22	0.06	0.00193
-10	0.11	0.01111	-10	0.11	0.01071	-10	0.11	0.00484	-10	0.11	0.00251	-10	0.11	0.00296
[truncated: 76,278 more rows]

## Sheet: Fig. 2q
178.059	mean	sd	197.101	mean	sd	203.051	mean	sd	227.079	mean	sd
[truncated: 5 more rows]

## Sheet: Fig. 3a O 1s
moox-0_dark									moox-0_light									moox-2_dark									moox-2_light									moox-5_dark									moox-5_light
[truncated: 101 more rows]
[truncated: 3 more columns]

[truncated: 24 more sheets: Fig. 3a Mo 3d, Fig. 3c, Fig. 3d, Fig. 3e, Fig. 3f, Fig. 3i, Fig. 3j, Fig. 4a, Fig. 4b, Fig. 4c, Fig. 5a, Fig. 5b, Fig. 5c, Fig. 5d, Fig. 5e, Fig. 5f, Fig. 5g, Fig. 6a, Fig. 6b, Fig. 7a …]
